# Supplementary material for: A Global Expression Switch Marks Pachytene Initiation during Mouse Male Meiosis
Source: Genes (Basel). 2010 Dec 13;1(3):469–83. doi: 10.3390/genes1030469 (PMC3966219; doi:10.3390/genes1030469)
Supplement: Supplementary File 1 — Supplementary Dataset S1 (XLS, 2393 KB) [file genes-01-00469-s001.xls]

## Sheet: Set1
Probe Set ID	Gene Symbol	Entrez Gene ID	Spermatogonia-PRJB02	Spermatogonia-PRJB05	Spermatogonia-PRJ07	Spermatogonia-PRJB08	pre-Leptotene-PRJB02	pre-Leptotene-PRJB05	pre-Leptotene-PRJB08	Leptotene/Zygotene-PRJB02	Leptotene/Zygotene-PRJB06	Leptotene/Zygotene-PRJB08	early-Pachytene-PRJB05	mid-Pachytene-PRJB04	mid-Pachytene-PRJB06	late-Pachytene-PRJB02	Diplotene-PRJB04	Diplotene-PRJB06	Round Spermatids-PRJB04	Round Spermatids-PRJB05	Round Spermatids-PRJB06	Round Spermatids-PRJB08
1415684_at	Atg5	11793	149.9	129.553	281.747	452.023	182.068	219.888	514.055	222.675	450.824	551.442	129.488	118.356	104.142	42.3591	23.6457	13.9225	10.8909	5.09913	5.6991	10.8829
1415773_at	Ncl	17975	1535.1	1540.61	2652.99	5829.6	1300.53	1935.1	6531.58	1432.92	2750.16	6198.55	504.288	239.45	915.039	84.4927	31.905	103.805	16.8742	18.9136	48.034	24.5664
1415803_at	Cx3cl1	20312	16.9403	17.1631	45.4686	45.8674	27.6074	46.8791	67.4704	25.2734	13.78	44.9425	6.11982	16.6387	13.09	14.754	13.1908	11.3942	13.0993	11.7401	11.1047	14.5709
1415822_at	Scd2	20250	568.997	319.321	297.837	920.905	738.296	410.403	383.113	1058.1	870.942	942.818	485.789	738.15	399.084	99.4876	359.96	71.1026	509.967	286.988	107.363	49.6883
1415892_at	Sgpl1	20397	900.274	544.097	917.673	1133.31	1198.96	722.644	1235.92	1111.28	1391.1	1263.13	227.639	398.263	220.096	51.202	25.0627	5.89404	30.6745	14.3501	14.7756	6.8531
1415899_at	Junb	16477	134.317	262.455	78.6196	1244.4	55.1734	49.7113	88.258	44.203	15.2639	97.098	17.4831	31.7222	15.7179	8.75835	12.6317	7.46532	16.0096	23.7773	16.6402	34.4953
1415908_at	Tspyl1	22110	301.867	291.004	515.073	515.527	311.225	195.969	680.667	368.421	355.394	680.638	110.1	141.571	83.3102	104.772	85.5219	40.9366	23.2162	70.4151	56.0582	98.4676
1415916_a_at	Mthfd1	108156	349.211	276.322	309.222	234.742	351.743	279.209	238.8	179.189	139.92	113.477	80.7702	37.3836	25.9166	8.31148	20.4551	20.179	40.4804	43.9863	20.4593	20.3584
1415922_s_at	Marcksl1	17357	4517.93	4296.69	5943.53	10387.7	6448.41	5917.3	11200.8	7502.71	10358.3	11997.5	4950.08	3330.85	2838.55	392.575	306.681	83.6743	287.772	56.4804	101.067	15.6524
1415923_at	Ndn	17984	379.541	284.59	352.094	812.774	374.344	195.43	339.107	362.516	390.555	455.757	104.944	139.958	140.079	49.5508	31.9793	14.9997	33.8885	26.8958	26.1049	37.8867
1415951_at	Fkbp10	14230	35.4566	33.753	75.8571	55.6435	35.5768	32.5217	62.1248	26.6957	12.6036	55.2999	12.3109	7.78365	4.55068	3.51739	3.49725	5.43283	10.0218	4.62987	5.62628	3.50702
1416035_at	Hif1a	15251	51.6507	25.7426	47.099	10.8788	58.836	22.7861	22.8826	31.2146	30.4007	9.47427	13.7675	11.7317	6.66202	7.06823	6.95627	6.07265	6.93062	6.34641	6.62961	6.50724
1416041_at	Sgk1	20393	253.487	200.349	151.236	908.246	373.422	175.942	538.423	569.802	534.571	703.329	148.13	325.086	206.015	50.2452	46.0828	125.925	62.0825	32.5554	34.4568	136.123
1416046_a_at	Fuca2	66848	9.67077	9.36149	8.10193	10.5765	9.65282	8.80365	8.85027	44.1378	19.5674	21.4064	8.22011	22.8832	8.03115	8.12206	30.8897	7.07186	19.5049	10.1631	10.208	7.50605
1416052_at	Prps1	19139	1350.72	960.235	1802.65	772.208	1061.81	864.544	1251.58	658.935	566.872	580.953	321.992	127.571	36.0756	11.8466	36.2271	15.4672	120.882	126.758	111.929	81.8874
1416057_at	Ndufb11	104130	996.682	479.341	294.807	1600.21	1186.81	606.219	791.459	1683.26	998.837	1055.45	852.867	964.59	500.278	170.997	151.804	32.223	195.081	82.4847	80.0232	92.9036
1416094_at	Adam9	11502	352.72	364.156	738.029	322.372	273.595	418.759	263.812	264.403	359.994	197.108	127.392	116.32	116.543	34.9387	69.2078	32.2142	40.8125	48.2722	17.5274	14.5313
1416122_at	Ccnd2	12444	176.215	96.4907	64.2418	594.899	307.492	117.932	172.351	496.055	348.559	341.678	127.582	444.79	231.992	59.8439	25.1011	4.58128	22.498	5.16617	3.57253	4.84963
1416123_at	Ccnd2	12444	132.563	53.8039	40.6236	336.038	199.355	41.7736	116.754	325.354	205.448	118.916	50.5925	189.51	65.4715	34.3455	28.9937	21.7449	28.9455	23.5325	46.965	44.3336
1416126_at	Polr1b	20017	56.5795	125.868	219.137	100.999	94.6734	165.66	166.068	54.0227	72.7164	104.71	24.8533	11.6572	22.9988	5.91056	5.65303	5.52818	5.6188	5.6299	5.58004	5.67627
1416173_at	Pes1	64934	73.4731	37.581	53.6251	169.731	110.15	52.2312	112.006	108.813	145.389	162.287	54.5567	53.5249	63.6064	27.2966	52.1969	17.5999	15.8572	13.8176	14.645	19.6721
1416201_at	Crk	12928	124.224	293.4	528.959	429.92	86.517	272.585	440.936	75.248	136.753	282.441	32.933	16.015	32.3654	16.3112	9.00315	37.8433	8.38778	20.8698	22.2251	20.5471
1416239_at	Ass1	11898	73.9524	44.3442	104.749	329.9	105.455	66.1003	251.632	122.157	222.659	315.373	24.2387	36.9248	34.6746	6.59321	6.48694	6.56879	7.61641	8.76	12.4432	27.3489
1416246_a_at	Coro1a	12721	132.647	150.346	148.976	311.203	79.1839	15.5583	41.9706	49.2758	14.8175	26.5384	13.1106	28.0332	14.4645	10.197	13.3378	8.06834	11.8361	9.78002	13.6232	13.8584
1416250_at	Btg2	12227	1043.92	503.91	293.44	802.442	896.479	838.599	622.506	788.309	421.528	220.86	113.941	354.285	191.804	62.5229	99.328	32.6272	135.852	63.6689	83.7309	81.7994
1416256_a_at	Tubb5	22154	2815.21	1438.8	1442.79	6639.98	5325.73	2857.34	4381.61	6425.17	5971.53	6455.17	2994.6	4566.24	2530.12	402.165	323.261	95.1457	341.315	82.3571	26.843	25.5607
1416258_at	Tk1	21877	317.562	441.756	582.119	247.384	228.72	316.753	308.545	142.819	136.736	129.541	49.9161	25.0678	18.9866	5.37332	5.66932	4.79274	7.81483	5.2805	5.41235	5.66857
1416276_a_at	Rps4x	20102	2917.02	1769.05	1007.57	6145.6	2231.25	914.608	1268.15	2466.98	1066.17	1430.67	704.952	2326.7	734.536	237.214	317.217	90.8436	293.86	189.885	160.838	310.509
1416357_a_at	Mcam	84004	253.948	242.503	522.455	630.581	251.734	441.478	710.392	213.02	939.167	772.2	251.39	112.722	159.178	18.63	6.25287	13.7056	4.86646	3.73833	3.98254	3.71334
1416380_at	Mov10	17454	251.324	122.252	195.554	594.897	426.339	174.775	394.909	495.242	334.436	617.475	121.131	300.71	143.411	42.1161	26.8109	23.7356	25.2492	22.0765	49.2653	8.93554
1416429_a_at	Cat	12359	846.24	360.099	557.12	351.454	898.411	263.497	524.693	658.903	292.616	234.733	93.7006	144.662	53.0963	60.812	44.4555	18.6571	40.4452	12.8168	12.6212	14.2151
1416430_at	Cat	12359	1276.35	738.567	1860.26	879.59	1124.76	639.841	1479.14	923.649	1223.55	683.428	249.773	257.469	183.363	84.7727	59.8814	45.2952	30.0956	31.2449	35.1124	58.2708
1416442_at	Ier2	15936	107.023	382.242	180.698	797.951	81.4203	85.1705	145.024	60.1258	58.3452	125.008	76.8885	64.6907	56.5779	31.4527	35.1406	20.5913	53.0941	59.4859	59.9347	58.5153
1416454_s_at	Acta2	11475	1608.86	1524.5	530.329	2329.29	1212.63	529.836	400.444	1374.95	338.564	671.548	423.743	1440.79	1075.84	235.197	182.153	186.679	785.871	270.01	506.178	296.453
1416459_at	Arf2	11841	7.76399	98.1377	274.944	59.9089	5.80871	48.3378	99.6487	5.13947	22.2147	80.4105	6.41295	5.04734	6.51622	5.21894	5.1558	12.0431	5.14107	5.67589	10.8147	11.659
1416467_at	Ddx3x	13205	87.6517	64.3964	64.6362	978.863	114.38	62.9527	306.934	226.157	360.51	399.327	36.9282	176.918	229.424	42.6927	12.0037	19.2459	57.2808	16.4598	65.4721	35.8356
1416482_at	Ttc3	22129	159.647	119.056	60.7528	252.116	146.062	240.03	319.502	159.455	219.732	82.3695	83.661	77.8557	72.3324	42.4555	34.9588	14.792	15.2957	15.2328	7.59157	17.9271
1416484_at	Ttc3	22129	496.703	659.11	180.855	795.33	507.134	636.568	641.916	366.162	321.111	260.765	221.681	121.772	161.398	120.463	67.0098	56.4077	36.3687	45.5985	36.6393	33.1664
1416529_at	Emp1	13730	7.20846	30.4245	8.41883	205.798	7.1722	27.9155	200.907	7.33007	6.27776	53.2327	7.60152	7.51324	6.96839	7.30279	7.19086	6.68366	7.31194	7.05455	7.62539	7.39035
1416531_at	Gsto1	14873	113.435	59.5015	52.8582	259.968	132.337	130.951	191.954	235.359	199.149	206.178	72.0632	125.91	40.1069	13.0249	6.93754	8.58915	26.139	18.3154	8.38128	7.11922
1416558_at	Melk	17279	2507.02	2377.24	5012.08	2022.04	2276.92	2157.13	2638.98	1284.79	1375.35	1368.45	639.214	485.369	203.666	133.068	65.3022	62.677	91.0166	57.2516	83.4718	46.775
1416576_at	Socs3	12702	41.6419	33.7571	27.347	494.845	22.4049	12.5935	60.7459	45.9847	29.7299	65.3454	10.9197	26.0007	10.7295	10.86	10.7993	9.47819	10.6799	10.6073	10.9943	10.8143
1416598_at	Glis2	83396	202.636	92.8812	120.919	267.777	271.557	185.325	204.574	254.422	243.989	153.534	73.7426	60.0019	36.3871	13.6558	7.78407	4.82684	7.60328	4.94392	5.04802	7.79704
1416609_at	BC004004	80748	678.904	819.523	1035.44	696.465	738.063	1038.38	860.955	730.599	1284.78	564.396	1254.62	474.063	590.217	375.072	291.602	177.301	175.052	178.931	103.1	77.1081
1416645_a_at	Afp	11576	859.33	222.606	193.063	1126.36	1077.52	303.073	552.247	1666.49	580.414	810.954	292.82	1159.62	281.022	146.341	43.6519	21.089	53.8113	10.9404	8.10132	21.5116
1416646_at	Afp	11576	168.793	29.9968	46.3885	289.971	206.096	91.386	115.027	406.627	189.002	227.185	115.382	333.471	89.7566	37.4014	13.5767	6.02433	13.5758	5.12693	5.22384	9.02635
1416661_at	Eif3a	13669	711.115	370.226	96.7684	778.117	698.156	503.878	923.138	680.025	491.663	216.377	160.58	227.388	129.904	213.861	157.96	47.6915	186.8	282.344	83.7331	227.506
1416672_s_at	Mcoln1	94178	297.805	304.936	301.933	136.272	277.192	466.903	184.349	185.411	295.561	74.7046	270.102	73.7342	122.06	43.5349	30.8569	10.1332	14.5438	11.1967	9.8055	9.74091
1416693_at	Foxc2	14234	103.621	29.3095	64.3533	146.103	94.695	23.6478	58.7585	87.3621	114.174	93.516	23.6361	56.681	24.6809	11.2875	4.78275	4.4757	5.11141	5.29995	5.44674	4.69019
1416704_at	Mapk14	26416	45.8112	35.5471	67.6693	41.4388	61.1349	55.354	95.3049	33.7641	37.1766	47.5957	11.0827	10.5964	5.6872	8.81082	5.64535	10.2536	8.90104	7.53089	6.4131	8.68943
1416714_at	Irf8	15900	30.644	13.5615	11.698	51.6918	13.7417	10.3058	20.9347	23.009	28.3078	30.3898	6.76191	12.1687	11.4577	7.77742	4.25909	9.24041	7.02225	7.27501	11.6089	6.76907
1416749_at	Htra1	56213	42.096	55.9261	22.4538	520.306	24.7622	24.2199	93.6217	78.6306	25.3767	56.2539	15.7976	30.2744	15.1651	16.1691	18.8837	7.46371	22.536	20.8283	20.8948	27.3187
1416769_s_at	Atp6v0b	114143	520.085	699.779	1020.41	865.253	466.719	981.129	942.485	441.332	1718.24	824.142	971.511	272.647	929.964	109.354	82.364	68.1364	55.3365	94.3633	79.918	44.2884
1416782_s_at	Praf2	54637	49.0441	29.7264	60.2782	47.2444	26.4123	39.7399	53.2369	24.689	31.9068	31.5416	5.34457	10.8693	5.53308	5.18731	10.3842	4.52376	9.12127	6.73269	5.30088	8.23093
1416788_a_at	Idh3g	15929	1877.41	1233.7	1767.2	826.505	1739.57	1528.16	1097.02	1171.16	597.841	440.113	405.012	463.924	141.346	53.1788	94.8878	13.4969	182.782	26.7155	33.7761	32.6943
1416789_at	Idh3g	15929	855.094	942.012	1368.01	688.764	619.6	668.107	884.1	552.45	562.423	427.949	196.154	295.678	91.8294	17.3114	26.7789	5.52369	48.4122	15.8234	10.7773	5.70479
1416800_at	Trpm7	58800	9.39408	41.7327	142.629	98.0599	13.0387	62.3352	94.1769	8.84416	50.8927	69.2566	9.55341	7.42158	20.7629	5.17891	4.97595	5.54427	5.08027	5.58233	5.29059	5.60817
1416801_at	Trpm7	58800	461.169	322.31	287.221	394.379	506.293	449.343	778.359	333.062	402.289	166.542	64.619	106.961	82.3724	29.5619	15.0201	11.2598	11.2168	5.19629	5.37005	6.97454
1416816_at	Nek7	59125	346.776	207.356	357.54	451.305	326.718	119.297	307.861	257.882	295.128	242.209	82.6298	112.809	21.6895	14.3917	24.0316	14.1071	14.7464	13.2746	5.99263	9.00089
1416837_at	Bax	12028	1566.72	3112.65	1636.29	1305.94	1882.45	3826.61	1631.78	2088.53	1080.95	1593.63	2507.08	564.055	264.219	189.054	51.2739	51.6329	39.3819	35.9431	27.8468	17.9129
1416846_a_at	Pdzrn3	55983	332.123	120.918	221.671	768.692	528.738	288.839	839.922	663.425	558.714	776.279	91.1728	252.1	124.375	28.9002	17.6158	26.1517	21.7639	14.2978	33.2202	23.415
1416853_at	Ncdn	26562	74.9671	44.9748	120.92	107.75	68.6606	78.8088	187.659	56.4272	103.078	134.83	10.769	34.2644	31.1672	6.96934	5.71465	5.04776	5.31647	5.36687	4.38021	4.36455
1416872_at	Tspan6	56496	47.8662	21.159	39.6891	14.6229	27.8739	25.2573	19.4141	8.78839	17.8256	13.1551	8.22547	7.15636	6.76499	6.78528	6.52592	5.88499	7.17089	6.39346	6.92023	6.48651
1416895_at	Efna1	13636	22.8879	13.5523	23.2034	33.1063	42.6676	56.0791	71.9421	34.417	62.7057	27.4888	16.7102	11.9471	10.3628	12.889	10.235	10.2845	12.7301	10.1199	11.8679	12.7268
1416897_at	Parp9	80285	52.797	7.16275	20.2879	116.257	62.1839	9.51741	43.1439	75.4308	59.5213	67.9161	7.22632	73.6167	27.2192	11.8856	7.16274	6.63999	6.68683	5.51595	6.63661	6.64102
1416904_at	Mbnl1	56758	373.058	255.703	285.815	1261.05	235.682	95.7596	218.9	198.323	114.031	215.115	33.4567	179.92	55.603	23.4181	48.8556	20.4037	84.9428	9.5023	26.1685	52.6959
1416907_at	Tsn	22099	1528.23	1388.15	2476.57	4245.33	1903.17	1794.95	3900.23	2245.31	4703.83	4412.71	1036.38	1237.55	2668.77	900.457	492.046	628.35	71.4586	84.5654	139.674	131.822
1416918_at	Dlg3	53310	65.7466	32.505	78.6178	21.0756	43.505	48.1111	40.7442	45.5282	29.2694	21.9877	8.59606	8.40792	8.45279	7.14775	7.91934	6.22553	8.00301	7.63353	7.3237	8.19108
1416928_at	Rbm12	75710	1355.07	1082.98	1819.89	2180.89	2086.28	1650.37	2912.35	1888.73	3498.73	3012.69	760.546	705.758	784.822	385.917	179.309	125.852	87.8864	59.8682	47.3924	29.3645
1416929_at	Rbm12	75710	39.009	17.7296	20.887	20.3885	67.3629	17.3766	48.6682	64.1732	50.5331	42.1027	20.7857	18.6573	14.1672	19.3892	14.0114	11.7097	13.7807	13.1747	14.6391	18.2502
1416942_at	Erap1	80898	189.223	67.1675	101.003	716.221	300.133	151.525	294.611	410.271	292.002	526.639	133.073	279.314	147.548	20.6161	4.24222	4.20678	4.43334	8.9428	3.7265	3.78259
1416982_at	Foxo1	56458	244.232	145.154	194.297	520.577	465.305	273.022	406.075	409.395	348.249	421.713	147.628	207.482	162.938	20.4746	13.9792	13.9927	14.3193	6.86642	5.99362	5.86906
1416996_at	Tbc1d8	54610	47.6125	24.6514	38.4766	143.014	50.3177	44.0892	57.5857	112.777	146.052	109.712	19.2477	75.6521	57.4835	14.3748	19.9851	13.3511	26.9695	12.7261	16.0679	7.147
1417019_a_at	Cdc6	23834	1620.61	1739.39	2964.84	1808.14	1094.25	996.98	1398.21	735.604	930.212	902.362	413.035	234.433	155.746	157.918	201.524	214.021	241.845	276.292	333.557	261.212
1417042_at	Slc37a4	14385	67.0078	66.9526	72.5661	35.4168	21.7233	39.7934	44.2622	21.3865	27.0965	20.9963	3.96386	12.7211	5.29181	3.95348	3.63246	3.80983	21.4321	3.9079	21.7261	5.71434
1417065_at	Egr1	13653	2851.6	2656.42	1357.57	11220.3	2443.31	1513.47	2613.04	2023.92	1723.76	2710.37	691.895	1179.29	1132.22	170.881	273.795	96.0253	467.641	374.417	407.827	439.371
1417079_s_at	Lgals2	107753	59.8908	15.1788	10.786	122.421	79.2042	25.7366	35.7286	141.096	63.3766	62.803	17.0083	139.786	33.6628	36.9476	14.9412	4.90304	12.6845	12.2779	6.13962	4.84786
1417084_at	Eif4ebp2	13688	583.699	322.683	171.857	496.317	779.734	325.885	640.527	456.648	163.613	288.441	179.811	167.948	136.211	139.746	116.974	75.412	76.3908	76.1794	50.2228	92.9153
1417090_at	Rcn1	19672	108.533	73.5261	66.4804	242.245	154.835	61.2799	83.7052	231.888	115.83	151.24	76.8346	168.686	69.0652	34.4036	39.5635	51.3832	18.8928	48.5414	15.798	36.3379
1417091_at	Chuk	12675	820.528	1023.53	2605	1119.54	805.225	1118.21	1909.81	543.049	1322.73	1094.65	227.746	157.512	278.193	120.505	78.9362	131.061	29.888	32.4569	45.4711	65.8194
1417124_at	Dstn	56431	1104.63	603.802	755.766	3573.22	1591.57	620.101	1253.03	1648.21	1168.42	2214.07	628.552	1489.76	857.14	253.399	257.635	171.361	238.336	164.526	169.247	187.305
1417133_at	Pmp22	18858	56.6848	30.8402	21.9867	188.838	55.0141	11.0879	15.4439	20.7681	15.9583	28.5757	11.9583	25.731	17.1705	12.9657	11.4032	11.7961	18.1009	19.3519	12.7379	11.4116
1417141_at	Igtp	16145	63.6276	34.913	33.6105	274.51	41.2667	35.6757	70.9366	131.086	50.798	113.098	35.025	131.476	37.9496	23.2304	32.3667	8.89062	32.243	6.281	23.2277	33.125
1417155_at	Mycn	18109	303.697	323.169	520.237	563.222	347.58	372.309	687.639	192.484	451.621	453.476	77.2339	112.629	73.4942	15.3679	13.3855	5.10196	8.80492	4.36485	9.34445	6.17132
1417275_at	Mal	17153	12.2264	12.1744	11.0552	83.0704	12.3978	19.2081	131.598	55.2166	11.5352	67.2514	12.4641	27.0232	11.9909	12.1828	13.0728	11.5435	29.7446	11.8168	12.4761	12.0345
1417279_at	Itpr1	16438	126.314	118.256	164.057	291.594	229.192	230.745	323.245	248.618	376.857	290.507	76.7223	103.037	96.1582	11.7596	12.2813	15.5541	68.3583	20.1797	21.1054	14.3017
1417310_at	Tob2	57259	169.054	141.601	221.338	142.447	148.76	173.718	310.641	104.758	172.157	71.4493	26.0488	49.9195	70.5581	59.5221	56.581	62.7128	43.6383	18.8803	32.6122	18.9067
1417312_at	Dkk3	50781	13.2363	6.87435	7.3921	40.2288	21.7125	7.18451	7.29407	31.0805	16.6205	26.6886	7.03845	19.9415	12.0562	7.61874	6.61403	5.94298	6.61685	6.46425	6.76377	6.13262
1417316_at	Acot13	66834	504.539	132.759	132.614	866.988	591.78	119.534	242.971	747.031	339.39	357.179	212.153	705.101	181.13	84.3957	79.9331	9.81788	48.1456	10.0018	10.7421	9.82557
1417323_at	Psrc1	56742	51.1665	46.251	73.6915	18.8496	88.8338	57.7687	74.5978	52.2132	60.795	67.066	7.85843	14.1507	4.65179	4.45304	4.67645	4.44856	4.2959	4.54568	6.81491	4.66737
1417355_at	Peg3	18616	221.397	186.891	166.555	139.718	136.239	231.917	183.131	90.619	91.5209	70.3806	38.1974	66.9994	50.5039	47.9675	14.3554	11.7786	10.5265	9.87729	10.8701	13.3498
1417381_at	C1qa	12259	176.31	35.3058	5.88744	104.94	147.541	6.05771	3.49748	5.7736	3.41521	3.45301	3.72024	3.59468	3.60881	3.6514	3.6176	3.47388	3.60654	3.59268	3.68222	3.59475
1417388_at	Bex2	12069	451.861	280.534	434.993	134.963	385.421	254.075	142.232	241.246	154.978	132.751	65.9231	70.3588	22.0021	28.1605	21.4149	16.46	27.8216	18.8873	21.387	18.9351
1417440_at	Arid1a	93760	338.818	187.767	766.254	1360	568.399	351.248	1208.22	503.533	1761.2	1226.27	149.776	695.153	789.675	408.305	459.849	292.878	266.917	210.312	215.359	295.063
1417444_at	E2f5	13559	1019.61	1792.98	2706.26	1744.38	864.628	1260.96	1817.02	763.242	1324.89	1312.91	604.772	284.901	265.53	108.617	94.8113	93.9863	249.434	299.955	270.308	202.618
1417454_at	Cul4b	72584	325.317	150.582	265.72	620.292	607.522	211.235	498.706	735.211	361.173	694.968	108.841	337.05	103.58	31.868	43.507	5.91065	49.2646	10.785	5.20788	5.93109
1417500_a_at	Tgm2	21817	9.37767	44.3223	9.56888	144.577	9.09876	24.6072	116.279	35.9262	6.93641	53.6096	9.23292	36.8524	9.18849	9.11931	10.2818	8.55896	15.6962	8.89139	7.9452	9.22556
1417521_at	Efna2	13637	21.2905	39.0633	100.77	32.0188	18.4274	41.913	62.8624	25.8815	43.0482	58.3606	45.2193	12.992	13.0086	13.2179	13.0962	14.1473	13.0192	11.1258	13.2608	30.9422
1417522_at	Fbxo32	67731	90.2351	18.7099	41.0169	239.956	128.157	27.6459	67.3849	91.5452	125.569	77.5614	12.2548	117.732	73.8235	11.3918	5.69201	5.45805	5.67464	10.8527	5.82345	5.66185
1417539_at	LOC100046775 /// Slc35a1	100046775 /// 24060	12.6486	17.5091	83.3417	41.3113	5.49796	22.8691	41.0512	6.23181	20.3708	17.3246	5.15085	5.45984	10.9716	5.06374	4.99187	4.92452	4.96962	5.04964	5.16338	4.96582
1417548_at	Sart3	53890	274.255	159.035	62.9731	163.213	305.561	224.346	287.355	238.602	133.689	61.4107	65.4645	63.4143	67.2292	91.2238	69.8614	35.79	34.2666	35.7818	25.5461	34.8536
1417549_at	Zfp68	24135	217.355	177.934	290.764	235.666	188.92	171.168	246.188	191.438	157.672	103.662	56.3287	61.4689	36.9608	23.4083	14.6361	16.0076	12.44	11.4037	15.2295	18.0914
1417624_at	Nab1	17936	154.792	77.8983	82.7237	421.713	216.912	95.2814	161.79	264.606	188.273	221.82	72.996	245.215	92.0426	35.4402	48.4554	14.3964	81.5489	14.3694	11.066	27.4425
1417629_at	Prodh	19125	89.8812	100.592	118.653	27.9993	87.5671	90.0765	57.2965	39.8269	30.8514	28.9958	30.4709	20.8112	15.6167	11.2323	13.1853	10.6063	20.3728	7.33907	20.286	11.2657
1417649_at	Cdkn1c	12577	1220.34	1762.8	221.373	551.659	288.821	287.228	265.726	420.919	271.664	267.106	246.867	350.384	163.078	97.7305	113.956	40.2389	375.012	254.854	175.852	238.373
1417673_at	Grb14	50915	14.9352	11.8171	11.4677	52.6549	24.5396	12.9619	38.0997	46.3383	37.7597	40.4431	12.531	12	10.8403	11.4566	11.2837	10.3501	11.2795	10.9539	4.8262	11.2722
1417741_at	Pygl	110095	264.476	84.3011	88.4643	668.888	332.555	74.234	107.148	289.633	170.299	210.188	32.0792	461.458	168.645	61.6673	44.4896	9.10637	42.7428	30.3459	16.1511	42.9831
1417752_at	Coro1c	23790	101.6	113.555	244.545	194.884	137.359	105.016	331.063	129.43	252.725	222.122	65.7262	69.4483	44.1024	18.1863	5.05289	9.27127	5.4044	6.13193	6.58864	6.98889
1417811_at	Slc24a6	170756	26.6008	27.5534	26.2209	85.2759	32.4267	27.0379	59.2486	98.0502	36.0527	66.8309	19.8185	44.4061	33.0865	19.7857	19.6246	21.5445	19.5524	20.5495	17.8544	21.7794
1417818_at	Wwtr1	97064	99.0237	88.0699	174.504	200.806	62.9571	81.3091	133.119	37.1408	26.4382	58.5836	18.8744	17.9967	15.0489	14.5726	14.7736	20.4601	16.2655	22.098	24.9013	29.0995
1417821_at	D17H6S56E-5	110956	56.7515	21.039	45.2816	132.506	58.9341	78.8872	150.871	72.5804	28.036	86.1695	7.35977	15.3186	7.04435	7.31748	6.7917	6.40323	6.7738	7.19124	7.3136	7.26345
1417822_at	D17H6S56E-5	110956	94.252	57.721	109.002	200.877	110.76	75.1767	146.914	150.547	116.934	124.381	30.7547	58.8702	17.1129	17.6027	15.5498	11.8838	55.0167	12.273	12.8164	46.4197
1417830_at	Smc1a	24061	453.551	334.59	866.43	436.429	482.516	480.434	497.807	264.411	339.778	227.62	89.1916	113.581	63.8556	23.9148	27.6193	7.14414	30.0553	13.6163	8.49093	8.39769
1417831_at	Smc1a	24061	194.052	123.463	36.304	142.128	134.812	122.033	168.134	80.8867	35.0038	10.7493	44.0016	15.5403	7.10655	9.29422	8.32604	10.1974	11.5592	11.3189	9.54042	11.6161
1417878_at	E2f1	13555	544.103	462.08	529.161	415.286	496.436	241.066	298.306	314.479	209.237	244.797	150.656	146.613	48.3618	20.7635	34.5158	7.2126	14.02	9.69293	10.9582	14.1244
1417921_at	2610029G23Rik	67683	3354.83	1675.4	3218.07	4403.85	2960.1	2317.81	4257.69	3558.81	4314.67	3638.13	967.471	1447.78	1064.38	216.983	131.079	71.2537	274.585	252.516	525.265	445.517
1417927_at	Ddx19a	13680	462.696	302.365	650.745	381.877	377.381	304.426	461.891	306.988	429.896	216.774	53.8732	99.9817	62.5663	26.0001	26.0002	20.5453	24.4435	7.74505	5.17986	4.96962
1417928_at	Pdlim4	30794	39.3351	24.2003	14.3193	81.4839	63.0319	35.6287	68.5356	74.8273	58.5408	74.6878	22.7278	27.8536	14.9167	7.55282	7.43252	3.51031	11.8965	11.8842	4.51249	3.64131
1417960_at	Cpeb1	12877	595.501	1035.17	1158.85	784.959	664.899	999.168	997.778	383.963	772.714	515.434	313.4	161.476	213.047	35.2217	13.6882	8.9533	11.4517	6.72898	6.6495	6.82816
1417985_at	Nrarp	67122	67.072	60.1335	134.066	83.5829	77.5485	97.9324	161.924	34.0915	55.431	80.3605	18.1182	14.2184	10.4878	4.36217	5.21406	4.11197	9.31561	4.20752	4.29238	9.81301
1417987_at	Btd	26363	50.053	13.5347	46.5119	58.6435	55.9958	13.4456	42.8206	37.8833	52.0068	43.9961	13.8221	16.9587	14.5597	9.76637	9.97984	10.229	5.09515	10.1851	12.807	10.0738
1418027_at	Exo1	26909	132.507	110.388	93.2505	177.597	124.967	101.973	214.804	87.7833	117.287	74.5482	18.7897	21.7985	23.5829	23.5857	17.883	7.23515	7.04597	5.1683	5.92141	5.23208
1418070_at	Cdyl	12593	593.412	692.77	937.219	1183.16	744.482	577.461	1433.89	613.96	1100.97	1320.91	125.591	228.601	161.196	55.1871	35.879	16.2536	23.882	9.82406	11.968	12.8202
1418078_at	Psme3	19192	802.387	571.271	1120.86	1409.07	1068.59	717.221	1823.47	1031.8	1569.83	1712.11	373.657	563.332	420.985	308.537	292.515	123.517	81.1812	112.652	83.4997	108.493
1418090_at	Plvap	84094	89.2937	45.7059	59.595	49.6012	50.5426	48.2896	34.9446	52.0085	15.5327	33.7263	9.7092	21.0045	6.78637	15.4412	16.6395	10.9857	16.841	11.7457	12.3409	10.767
1418091_at	Tcfcp2l1	81879	45.8919	36.8027	91.823	53.7974	90.6387	106.42	111.378	60.455	108.055	79.4465	32.3157	31.3244	31.6203	7.83016	5.53517	7.25837	11.6681	29.3331	19.3193	11.6082
1418104_at	Nrip3	78593	55.2955	55.4082	47.3946	32.5402	65.0546	60.1991	40.9457	41.7161	24.5506	13.0012	12.2918	9.46678	9.47904	14.937	10.2578	10.2173	11.216	7.72563	12.7675	11.1259
1418108_at	Rtkn2	170799	162.503	110.783	236.75	127.528	271.663	163.367	201.314	166.87	199.375	219.327	53.6086	57.0437	41.5763	23.8806	22.5993	16.6314	23.1574	16.619	17.8204	17.0671
1418129_at	Dhcr24	74754	281.194	104.194	111.094	429.349	472.096	148.804	539.733	435.503	145.726	268.926	57.0939	140.029	50.4689	30.1149	16.3772	10.0446	15.9291	11.4636	8.37751	12.1806
1418149_at	Chga	12652	200.277	305.153	303.1	56.4499	147.503	240.246	102.67	94.5697	98.4435	55.4062	56.4305	41.4554	16.8988	16.1439	10.2977	7.3462	16.6803	20.7174	16.201	7.80456
1418152_at	Nsbp1	50887	327.44	149.685	247.2	462.469	309.427	140.071	320.458	338.86	387.278	447.655	26.1178	276.505	97.4909	34.0623	60.0428	7.26503	45.0822	8.34056	9.72016	24.4289
1418170_a_at	Zcchc14	142682	108.31	217.935	65.582	246.882	121.741	204.327	220.72	85.7751	92.5007	137.182	57.9858	42.7288	17.4811	50.2769	27.7764	26.8301	10.5347	40.3449	10.7005	37.1339
1418171_at	LOC100045031 /// Tceal8	100045031 /// 66684	62.5623	132.874	118.532	181.018	43.3596	80.5364	67.421	66.5539	95.635	73.1528	32.7084	26.8992	27.2912	6.92166	27.3107	18.443	11.5175	10.8442	25.3586	20.9938
1418188_a_at	Malat1	72289	822.75	1238	151.847	1814.66	677.175	2022.54	1436.5	796.435	450.208	120.645	341.191	244.056	283.14	333.285	182.081	140.313	266.34	1345.3	252.724	391.493
1418202_a_at	Wiz	22404	124.326	125.46	273.384	269.392	229.403	176.804	454.899	191.237	377.795	352.052	87.6392	105.294	114.304	79.7559	73.0337	39.6786	35.4698	28.7035	28.5287	28.8105
1418257_at	Slc12a7	20499	471.327	300.678	322.585	996.668	821.539	601.746	598.754	939.538	781.054	740.457	374.329	437.452	374.113	96.4013	133.687	255.641	171.833	190.667	168.762	237.448
1418294_at	Epb4.1l4b	54357	290.601	228.442	301.85	757.68	520.814	361.007	551.62	677.887	477.387	634.835	171.74	342.519	135.7	26.766	12.3706	10.9982	19.7807	10.8258	8.0974	6.4682
1418329_at	Pgpep1	66522	79.6207	62.4958	140.097	145.738	128.616	67.4511	132.058	124.841	181.863	128.515	61.2616	54.9794	49.3327	10.6216	9.46014	20.1222	7.58485	7.43238	7.63059	35.6481
1418331_at	1110031I02Rik	66179	175.606	149.737	222.376	107.079	247.975	388.306	212.205	202.569	307.803	120.162	250.796	51.1408	49.4144	11.126	5.85911	4.51596	10.0794	5.18966	4.69388	4.63272
1418350_at	Hbegf	15200	21.3237	9.63243	14.1899	104.848	21.1245	23.1345	96.0039	40.507	43.2319	61.1543	8.95383	33.2753	26.4188	20.599	20.7725	27.6616	15.1518	8.0069	12.0746	11.4775
1418359_at	Wbscr27	79565	19.1097	11.0433	36.2233	25.8118	21.0168	24.0931	50.5961	10.8394	48.1025	23.4583	11.8859	8.85788	7.6745	8.43759	8.32466	7.17071	9.128	8.07787	7.70989	7.60122
1418394_a_at	Cd97	26364	105.464	126.32	165.497	220.172	45.5876	121.771	137.248	60.4898	124.838	44.0213	62.5969	47.5813	96.8822	44.5401	44.1459	39.3204	32.5615	43.2511	44.4432	43.3885
1418429_at	Kif5b	16573	798.268	851.961	1875.49	861.938	735.284	851.725	1134.87	602.056	806.029	927.786	198.008	222.589	222.672	139.503	143.33	98.421	68.8	47.8728	41.3535	34.2345
1418431_at	Kif5b	16573	856.535	729.001	202.273	470.933	729.2	706.266	915.645	580.967	692.861	276.575	273.544	137.954	105.389	110.815	88.5661	23.0813	40.0549	37.0375	18.3813	11.082
1418436_at	Stx7	53331	225.082	84.0209	160.688	529.875	220.803	106.37	245.588	275.995	210.336	317.586	102.712	216.517	126.634	38.2674	18.7104	9.66561	11.5474	6.3054	3.87114	4.31127
1418449_at	Lad1	16763	10.9608	7.21927	9.5826	10.1046	54.1179	40.4049	90.3129	50.0833	43.4471	20.7298	6.35365	7.17677	7.17655	5.92614	4.89417	5.87237	5.22278	5.69247	6.13356	5.56479
1418467_at	Smarcd3	66993	285.016	181.219	200.475	490.027	439.141	236.271	374.658	661.341	399.837	376.382	212.114	268.817	100.923	32.3274	21.454	10.1807	34.1461	10.3698	25.5217	10.8295
1418469_at	Nrip1	268903	40.8639	38.5795	16.2664	23.7813	58.9824	49.0557	39.9507	22.8837	21.1707	13.5385	14.784	11.9212	9.35568	11.1145	9.43047	9.41899	9.40397	9.37044	9.68281	9.66853
1418470_at	Yes1	22612	15.5944	38.6668	68.2659	45.9931	13.6825	47.487	106.764	13.9981	22.1515	58.3515	14.6332	13.9635	13.3632	13.5863	14.2924	12.2014	13.4317	12.8649	13.7606	19.2268
1418512_at	Stk3	56274	716.723	479.517	684.565	328.068	604.348	447.131	420.986	397.405	264.11	282.832	160.119	139.766	45.6877	43.677	50.2242	32.5576	141.054	103.786	79.9809	103.49
1418513_at	Stk3	56274	17.3496	46.7117	125.214	171.773	19.4748	48.1526	125.986	9.76583	48.054	146.278	12.0801	11.3992	15.2562	7.60058	7.97867	14.4719	28.8059	28.4972	77.3599	13.9606
1418545_at	Wasf1	83767	2178.81	1325.29	1989.43	2641.9	2859.95	1742.29	2851.42	2803.82	2498.22	3284.62	804.629	1155.36	791.278	223.562	118.39	69.7917	301.135	126.926	135.385	114.276
1418573_a_at	Raly	19383	1153.82	1367.15	589.297	948.14	1311.38	1696.29	1026.21	1487.04	1097.97	584.614	1354.2	517.009	518.289	338.589	133.489	93.4992	75.0893	114.266	95.4659	53.9562
1418587_at	Traf3	22031	151.474	63.0755	162.656	423.42	239.705	111.713	185.094	277.377	390.092	224.497	72.2725	164.897	184.26	14.4426	7.16365	6.9192	8.13092	9.72887	10.9419	6.38923
1418602_at	Cdh15	12555	25.6482	22.7459	25.0514	52.4712	44.1043	29.3213	60.5229	68.1123	57.6219	47.1487	26.2191	28.1936	29.8055	24.2828	24.0316	16.1846	20.4592	7.74915	25.7369	25.6473
1418634_at	Notch1	18128	104.506	87.2952	75.5234	164.694	191.451	188.995	227.536	153.574	203.728	215.978	84.9653	53.6737	37.5589	18.9553	21.0437	17.5672	25.845	17.9313	19.1461	16.9471
1418648_at	Egln3	112407	34.5456	11.6553	21.4827	45.8734	65.3484	19.6926	26.251	52.6722	47.2993	45.0229	8.63112	13.705	10.9351	7.98195	4.26121	6.8798	4.23645	3.54899	4.29507	4.26668
1418649_at	Egln3	112407	206.764	96.8888	114.045	195.002	308.925	132.229	211.153	248.657	211.573	198.672	47.7622	88.6717	20.4215	11.3949	11.2718	11.1203	11.9168	11.1408	11.4165	12.302
1418664_at	Mpdz	17475	879.464	609.143	1193.14	1323.59	1044.51	911.765	1188.85	1009.63	1314.38	1229.99	294.683	458.163	345.935	217.677	146.427	125.142	154.488	148.063	185.116	94.9848
1418709_at	Cox7a1	12865	61.156	22.5621	22.8016	51.9756	79.9375	58.1178	56.2114	98.9775	46.7813	71.8085	46.5592	29.8154	16.6436	17.8992	17.6527	15.5986	17.5917	17.4171	17.7627	8.75676
1418733_at	Twist1	22160	30.5754	11.1987	11.1266	81.4427	25.1534	8.10723	10.351	30.7669	22.7978	27.6114	11.9296	25.8541	10.903	11.4806	12.3891	10.2271	12.5926	11.5359	7.39694	8.66885
1418774_a_at	Atp7a	11977	594.673	279.444	307.368	247.681	837.906	409.113	527.888	590.684	462.708	183.953	148.809	171.491	70.2713	25.3367	25.6765	9.41743	53.3398	13.5845	10.2423	9.92136
1418780_at	Cyp39a1	56050	41.8173	32.0593	38.5589	21.6661	49.7934	61.025	14.5541	28.6733	19.4038	11.089	9.68011	10.0408	7.74322	9.26182	9.12416	7.33723	9.15198	9.26637	9.03661	9.3158
1418792_at	Sh3gl2	20404	83.0705	51.3236	134.336	178.878	90.9874	84.656	156.705	85.6626	170.567	170.075	27.1683	58.0267	26.519	11.7685	28.25	14.4493	18.8936	16.3555	13.6342	20.5267
1418827_at	Eri1	67276	149.496	85.5466	228.659	72.4808	84.1521	46.4208	91.7764	100.259	47.3902	57.7383	15.6971	33.126	18.2081	68.1616	36.5299	10.8259	19.2178	14.5082	15.5926	16.1839
1418835_at	Phlda1	21664	258.535	88.3106	39.4839	309.208	136.711	28.4394	58.8056	56.2545	35.1735	48.1953	13.793	26.3279	13.764	13.7778	13.259	12.1424	22.1209	13.0509	13.8183	30.9447
1418873_at	Sfxn4	94281	34.4015	55.434	76.3791	38.7972	27.8518	30.3072	32.6231	29.8025	32.0353	21.3974	12.9996	12.2281	10.9069	12.7722	12.2327	9.0551	12.4111	9.5846	12.3108	11.9078
1418880_at	Gfra3 /// LOC100045484	100045484 /// 14587	10.4043	10.6282	11.234	15.2767	16.385	9.607	12.423	20.3281	24.9426	31.2689	9.24043	12.4279	8.26655	8.6037	8.52805	7.84989	9.11936	9.09704	9.2601	10.0519
1418901_at	Cebpb	12608	231.301	286.285	258.162	799.108	158.903	125.12	175.056	157.66	131.007	197.245	98.8663	141.56	134.791	43.9254	31.741	23.0378	71.2321	58.0457	55.5868	46.538
1418972_at	Bcl10	12042	7.41662	55.8569	124.453	194.001	7.5422	35.9014	78.9047	7.3614	50.3709	104.845	10.3018	7.22625	25.6061	4.47879	6.4995	20.0941	6.12607	7.87522	20.8629	17.4294
1418982_at	Cebpa	12606	21.5785	15.5473	10.2404	31.686	18.4278	10.8051	30.3259	19.304	19.6056	34.2757	10.6918	10.7032	6.41069	5.11897	4.96713	5.15769	5.07557	6.38929	5.72143	6.41679
1419003_at	Bves	23828	62.4339	51.5055	80.3712	51.1799	48.0699	55.806	74.3881	36.92	41.6559	52.943	11.5831	9.42141	9.10351	8.70433	8.6224	6.58508	6.1924	8.50368	9.0042	8.57175
1419007_at	Zp3	22788	38.2917	59.6814	90.2459	23.549	50.961	90.8129	104.684	37.9784	69.7502	43.0205	10.3102	9.99318	9.04288	6.14895	6.10752	5.74001	6.04258	4.85101	6.43386	4.70454
1419030_at	Ero1l	50527	12.6709	51.2494	68.9491	107.084	33.0753	46.1081	106.574	42.9451	49.5543	103.604	6.92259	16.7064	40.4774	5.80901	4.10774	6.63914	3.34576	3.35007	3.19613	5.41688
1419062_at	Epb4.1l3	13823	60.2586	81.834	119.938	481.841	131.002	145.435	194.404	162.054	306.378	392.276	107.501	125.405	134.065	17.3031	12.0112	11.8918	31.6049	7.52056	5.95851	10.201
1419066_at	Ier5l	72500	32.0584	41.1525	22.7364	85.882	84.7136	101.096	213.366	87.1667	36.1222	147.223	91.9805	25.6672	8.30194	13.6503	19.8033	8.28166	24.9444	34.4491	8.48659	21.9971
1419108_at	Ophn1	94190	205.611	109.829	168.288	152.986	334.573	171.958	372.585	267.508	288.97	210.138	91.503	81.9047	33.0242	11.1863	10.875	9.79873	11.0104	10.9403	11.3103	10.9607
1419137_at	Shank3	58234	68.2806	14.4297	22.2553	89.3119	101.983	21.5389	89.989	138.032	51.4031	63.1683	23.9361	118.735	27.5953	12.969	20.2294	7.78626	20.3718	4.98671	8.57547	5.02071
1419155_a_at	Sox4	20677	525.808	304.491	232.071	818.192	925.336	454.495	897.206	775.713	595.248	721.138	287.442	255.74	146.308	25.7845	28.6774	10.1422	30.2774	14.5874	11.0362	28.5355
1419156_at	Sox4	20677	709.057	345.676	225.976	748.714	1015.13	396.114	660.551	780.602	520.909	517.318	255.241	253.013	147.129	49.9247	22.8983	9.3685	51.5853	10.9371	22.6519	24.9767
1419172_at	Dhfr	13361	2308.97	1557.59	2467.51	845.055	1311.87	925.28	964.538	703.323	698.73	635.557	559.351	211.192	156.85	178.24	134.078	62.4376	82.1163	63.858	60.7544	126.456
1419180_at	Bcl9l	80288	90.5326	52.7425	85.1947	141.647	259.422	101.074	308.807	164.814	184.392	154.781	51.799	48.216	47.8568	7.02632	10.1622	9.60174	27.5082	6.55531	6.62682	6.31458
1419217_at	Sergef	27414	43.69	39.7092	23.3558	55.0899	32.9041	22.6398	33.5097	52.5978	42.1724	54.0862	16.5616	16.6843	15.5871	16.1736	15.9753	14.8457	21.3806	17.1434	16.4959	15.7066
1419228_at	Elac1	114615	89.3791	150.798	176.489	77.8555	59.3601	102.614	105.818	75.2171	111.598	70.2578	30.2075	28.5527	32.321	29.7379	14.9637	11.2282	6.96177	10.5021	10.6618	12.3446
1419229_at	Rhox4a /// Rhox4b /// Rhox4c /// Rhox4d /// Rhox4e /// Rhox4f /// Rhox4g	194856 /// 434759 /// 57737 /// 636177 /// 664608 /// 664609 /// 664610	23.1875	11.281	14.4449	24.9797	35.9515	15.6706	13.1806	106.41	60.3063	26.0829	26.9347	58.8156	18.5242	16.2813	16.0744	15.2981	51.1771	20.9039	11.4594	9.02162
1419238_at	Abca7	27403	85.4282	127.172	137.101	46.8605	59.241	113.411	70.4843	50.4652	40.2581	47.7039	15.2808	13.554	10.943	9.79188	10.6226	10.4692	9.61184	12.0729	11.3632	11.3531
1419247_at	Rgs2	19735	226.516	150.473	154.548	490.379	127.141	80.1323	146.591	68.9199	56.9735	92.3892	25.3657	40.2313	11.0983	9.4726	10.7747	5.92585	17.1339	7.74795	8.37759	6.71786
1419248_at	Rgs2	19735	362.594	150.283	233.826	386.27	183.988	63.9992	121.709	99.61	54.2895	55.6227	46.4729	46.5909	21.4368	11.5523	15.2928	10.3788	31.8672	11.8576	11.7578	31.1044
1419289_a_at	Syngr1	20972	428.322	270.552	321.436	83.4493	168.062	261.134	228.127	139.404	135.107	76.1988	106.363	17.7075	14.4316	17.016	11.4934	11.3031	11.4451	11.4512	17.0473	12.5694
1419301_at	Fzd4	14366	45.9885	41.0027	53.2658	40.3175	57.738	30.6511	34.8975	19.7811	18.6291	16.871	13.1312	12.4008	12.4071	8.76451	12.0177	11.7526	12.864	11.0154	12.4687	12.5886
1419309_at	Pdpn	14726	27.6712	21.7311	15.7653	135.68	34.7956	18.4803	21.4938	65.7028	35.8995	46.2929	20.8926	28.8186	12.5683	19.5947	16.5287	10.8815	23.6745	24.9851	8.9652	11.5314
1419328_at	Sema4f	20355	52.1384	25.8363	77.0849	16.4413	45.953	69.9964	60.3892	18.0476	38.8081	23.7164	11.675	7.75534	8.35915	7.81976	6.67821	7.61551	5.39986	4.39528	7.84831	7.81927
1419355_at	Klf7	93691	59.2495	19.9151	44.0598	168.657	92.2611	36.1823	128.834	74.6599	132.704	112.262	13.9254	25.8965	18.2049	5.8906	4.45015	2.66993	4.43246	4.40812	4.51498	4.43256
1419357_at	Isy1	57905	75.3377	84.4697	163.66	241.087	53.5853	120.404	196.408	93.0817	139.096	195.608	55.728	51.9193	48.9543	62.4645	30.0298	13.5585	11.7861	13.1899	12.1081	9.20647
1419359_at	Hexim1	192231	20.2214	44.4014	60.1038	215.034	13.9768	184.426	482.321	14.2599	115.342	203.666	16.9677	13.6269	13.7345	12.201	13.8336	20.2748	13.8576	14.2011	14.2622	78.0194
1419418_a_at	Morc1	17450	444.083	181.97	284.812	1057.84	571.539	241.506	531.287	727.62	547.759	689.034	182.755	617.591	283.136	135.557	67.6377	52.2026	47.3135	63.8949	51.9963	18.2175
1419459_a_at	Magt1	67075	226.393	191.065	133.925	171.065	174.697	203.456	148.045	110.229	114.108	55.6173	14.5015	18.3101	13.2509	7.93661	7.95219	10.3221	8.75272	7.85916	8.00107	8.04319
1419466_at	Nkd2	72293	45.5536	86.6982	134.332	57.0739	93.6086	164.65	149.42	52.4329	132.832	74.2652	35.2135	14.3919	20.478	10.2189	14.5872	9.78047	15.6608	9.94856	24.0586	17.0743
1419554_at	Cd47	16423	72.78	54.6924	81.123	239.92	35.4489	44.0491	65.2209	52.2818	41.644	43.6762	24.6952	28.0969	20.0799	11.9227	15.7699	18.5037	23.7547	31.2709	18.7724	17.589
1419561_at	Ccl3	20302	1135.51	102.391	58.8343	480.752	459.807	4.40195	4.40385	28.7745	4.19933	4.85288	4.57863	4.52801	4.42586	4.63326	4.57333	4.36824	4.62286	4.5192	4.65651	4.56937
1419568_at	Mapk1	26413	773.353	1670.73	497.764	396.452	832.16	1672.4	590.825	752.15	425.881	294.169	855.926	83.075	75.7903	92.9954	44.7463	124.901	268.143	173.607	91.4677	36.2919
1419574_at	Zfp292	30046	367.857	381.305	973.079	724.572	562.081	615.869	1098.39	511.756	1142.5	958.224	167.716	152.406	202.114	45.8617	39.2946	35.443	39.395	36.8325	41.6309	18.3226
1419575_s_at	Zfp292	30046	619.98	544.592	897.917	858.673	873.828	966.934	1058.19	908.183	1302.01	911.35	353.949	316.028	211.787	44.7726	16.2514	32.9548	72.2236	27.6612	21.9718	19.3056
1419589_at	Cd93	17064	18.0299	21.3507	15.3062	90.5881	9.84025	10.7004	76.5592	13.5377	10.0023	40.7138	9.92113	17.8206	9.65715	9.85441	9.94028	9.29453	9.7821	9.61744	9.9776	9.67175
1419645_at	Cstf2	108062	1185.47	1125.12	1724.18	1175.11	1477.52	1191.69	1376.16	1202.05	840.688	603.139	396.011	385.484	198.98	67.9699	42.9534	18.5467	45.0588	24.4057	19.5789	19.2385
1419647_a_at	Ier3	15937	120.75	140.857	60.138	533.146	63.5469	58.9837	168.956	150.191	64.5503	144.297	82.1567	66.9904	25.3724	10.8127	30.342	9.39222	57.3439	28.7219	12.472	13.2187
1419669_at	Prtn3	19152	97.4693	98.7307	100.468	109.894	79.9165	48.8231	48.5175	58.3701	44.8853	35.1033	13.7191	47.0606	19.2876	14.0726	11.1655	10.4459	12.128	11.6591	12.1419	12.1492
1419690_at	2610002M06Rik	67028	173.306	193.169	228.735	196.621	147.56	154.868	221.854	94.16	157.894	152.995	36.9398	53.6118	21.6963	12.7894	12.8453	11.099	46.5876	45.1353	59.1856	24.9236
1419714_at	Cd274	60533	77.239	46.5624	51.6103	369.157	69.9767	75.3202	131.835	120.362	238.707	197.581	52.1471	186.949	191.776	53.1289	43.0515	26.8738	21.2158	20.8377	21.591	17.0895
1419811_at	Adcy9	11515	94.4823	24.2439	74.6937	83.7766	124.993	68.5968	90.9026	94.9333	109.871	95.5474	26.1888	22.8665	24.0021	8.05832	10.1404	9.15624	7.97638	7.97944	8.90413	9.40044
1419816_s_at	Errfi1	74155	14.2945	66.8117	156.73	256.01	13.0004	60.3271	132.816	15.3128	56.9711	115.509	12.3691	11.8975	28.6563	11.9391	11.6479	18.1269	10.9066	10.4627	24.1221	11.4347
1419823_s_at	Ksr1	16706	40.7937	41.3041	40.9443	92.7031	60.3715	53.3237	89.9215	93.7987	124.758	109.499	27.5837	46.7056	40.6913	41.6476	37.5267	12.2442	21.489	24.4855	21.0588	21.0852
1419911_at	Coro1c	23790	59.6453	29.4969	12.2383	58.1527	113.657	29.3531	24.1058	69.3386	7.87296	27.6837	8.05334	21.0976	8.4756	9.75224	12.4181	6.19177	12.5097	8.18655	8.31895	11.948
1419998_at	---	---	114.927	92.2165	91.4643	37.6545	101.978	104.973	85.2944	91.9851	22.167	70.038	33.6374	28.552	8.88539	25.6807	10.7624	8.55059	17.5625	12.2569	11.2315	11.4631
1420000_s_at	Igbp1	18518	234.362	69.7535	116.952	197.575	111.106	33.987	51.8294	94.8818	38.4616	45.7954	23.5257	87.0412	32.0368	19.577	32.8278	19.1648	50.8467	20.3541	38.995	22.4172
1420022_s_at	---	---	300.768	137.284	60.9279	158.295	213.234	201.003	239.308	202.953	39.7358	129.836	55.5385	65.0913	23.2182	68.636	52.7044	25.4134	61.0761	49.1034	35.5443	59.3961
1420136_a_at	---	---	162.001	120.228	265.465	37.2727	250.948	568.98	141.581	200.669	497.415	81.8905	182.884	44.9813	99.3292	42.9292	44.58	31.2147	53.4897	87.4803	49.5959	31.5775
1420170_at	Myh9	17886	45.0953	42.6413	84.2353	181.181	106.41	51.7844	154.621	75.0405	92.3488	115.986	21.537	36.7485	28.7644	8.43357	9.39644	8.57182	5.94272	6.76551	9.47178	6.9646
1420342_at	Gdap10	14546	141.1	96.9863	56.6985	118.508	213.236	345.54	191.866	152.859	166.602	92.5223	55.3337	56.2572	45.0057	14.5453	14.3503	16.7227	11.7803	6.10374	5.23343	6.13706
1420363_at	Bik	12124	48.6038	54.6039	129.747	116.344	36.3867	39.2303	167.266	73.4193	98.4898	167.794	25.7582	42.9331	15.4763	11.0265	7.61896	7.32932	7.51356	8.44849	14.5899	7.52311
1420367_at	Denr	68184	30.1196	20.3659	98.2276	22.6063	50.45	13.1332	56.6988	18.6624	41.9409	41.2753	14.5257	12.5766	11.6688	13.5681	12.8219	10.7819	13.0276	12.1925	13.8025	14.1946
1420386_at	Seh1l	72124	394.259	359.744	713.789	448.465	377.283	299.501	526.766	257.748	395.819	515.447	85.8881	81.0488	73.0701	24.8716	14.27	14.2387	17.5043	17.7022	12.1011	14.0868
1420410_at	Nr5a2	26424	11.3156	11.2138	7.8872	33.2626	28.1905	14.2342	20.6924	27.1528	23.7992	28.3946	6.33912	45.7135	8.14167	7.54035	7.55009	9.61322	9.47172	7.61826	8.0342	66.7881
1420454_at	Rai1	19377	92.748	113.078	88.6519	173.104	189.248	238.019	191.036	103.373	237.029	105.929	56.6408	50.3484	26.6578	12.4304	12.2353	11.6126	8.48226	8.8866	10.2975	4.88094
1420498_a_at	Dab2	13132	33.9464	14.5825	8.5615	90.6577	20.4717	6.33192	10.8578	10.4035	9.8766	21.9386	6.80627	8.28164	6.42063	6.92299	6.8004	6.50275	7.11191	6.96581	6.8685	6.79033
1420502_at	Sat1	20229	160.995	244.905	195.24	989.409	106.686	99.7295	275.299	143.093	155.005	267.766	46.6255	121.805	50.6984	27.9346	23.7443	19.7412	27.5658	21.1374	32.3046	55.8064
1420514_at	---	---	226.192	83.0709	262.524	136.851	164.376	91.3697	93.8212	101.895	48.7112	72.0045	53.9962	32.3665	25.1605	29.1464	28.3461	7.32441	34.6786	9.39516	18.4244	32.5034
1420539_a_at	Chrdl2	69121	39.8207	47.478	66.4467	28.3463	89.4477	49.4639	82.9513	54.1142	63.7399	54.9032	16.637	6.69792	5.42283	4.28863	4.04143	3.90075	3.96255	3.97412	4.10725	4.03996
1420565_at	Hoxa1	15394	25.369	9.10915	8.90263	36.146	54.2837	11.3832	17.4512	74.8124	27.1631	35.1409	9.94946	30.895	9.27119	10.5523	9.47502	8.86971	9.10973	7.70381	9.87438	9.97385
1420592_a_at	Anp32e	66471	1850.63	883.878	1091.27	2489.74	2090.28	1323.18	1911.18	2730.78	2208.8	2099.53	801.553	1561.54	723.348	216.074	113.763	35.9371	118.104	21.5386	29.9527	16.2216
1420611_at	Prkacb	18749	681.017	890.142	1017.41	875.595	643.126	839.818	952.858	368.228	475.076	480.469	292.519	96.1438	133.416	52.044	59.9737	31.9262	34.4467	17.5129	20.8111	15.6088
1420612_s_at	Ptp4a2	19244	22.3763	33.308	82.7744	188.739	22.6321	23.508	74.346	22.9035	39.6903	56.8958	22.7654	13.588	25.1376	21.3825	20.0065	29.7885	15.4914	22.6619	16.9001	23.5088
1420614_at	Dynlt3	67117	76.8611	87.664	53.9838	185.514	58.6903	86.1556	70.5542	62.7938	23.1653	39.5379	39.654	22.0017	6.57121	7.06549	6.31745	5.18645	8.56326	29.4105	5.58272	18.5001
1420636_a_at	Dusp12	80915	197.59	259.735	353.407	120.586	129.255	246.622	209.607	94.7392	119.856	84.6851	21.9918	41.2834	23.0097	24.2517	18.203	12.4879	42.7449	15.3542	14.6995	6.89435
1420645_at	Pcgf2	22658	97.1561	138.942	174.882	99.7274	127.371	87.2639	261.485	49.0552	77.4299	118.233	39.9527	37.4387	37.4063	18.5031	35.7671	30.7447	42.5213	17.2428	34.5282	38.3079
1420654_a_at	Gbe1	74185	32.1258	19.8733	50.0577	28.5757	20.5853	18.1538	49.9882	39.1944	33.6478	53.678	19.0158	15.9123	16.369	16.5935	15.7767	13.7957	14.5198	14.7222	9.88701	16.2719
1420667_at	Doc2b	13447	19.9843	10.2688	22.0677	25.6982	17.9995	37.2144	49.0508	45.3434	69.8464	37.4994	8.61433	12.5411	7.8538	7.5827	7.51047	7.27553	7.46713	7.45422	7.61551	7.47905
1420710_at	Rel	19696	245.184	195.756	353.131	134.155	258.498	281.447	242.552	104.228	124.003	123.241	59.8932	52.5081	13.9081	6.40836	6.30108	6.09019	8.01187	6.1607	12.509	8.89632
1420739_at	Cntn3	18488	81.2308	58.5956	130.327	21.1524	69.838	75.8625	64.9767	55.0548	48.729	19.4988	18.6803	20.4211	11.8044	7.208	7.71194	6.65286	32.2316	19.625	27.9491	17.9669
1420760_s_at	Ndrg1	17988	250.912	209.308	269.709	478.697	361.703	269.54	433.177	436.945	585.917	408.528	202.159	194.451	135.065	43.6162	12.0128	9.50867	9.81661	9.74051	9.93579	9.79125
1420772_a_at	Tsc22d3	14605	1147.01	1354.6	2796.02	3953.76	1336.62	1586.46	3022.27	1563.72	3553.88	3104.6	954.518	775.788	831.352	92.0614	31.1304	24.7985	29.4745	13.7378	17.226	22.0527
1420817_at	Ywhag	22628	19.2424	29.9202	125.552	184.868	19.2576	40.897	117.267	19.1261	128.967	134.497	19.2386	14.8072	22.6801	15.1794	15.045	14.5098	14.9622	14.855	15.4884	14.9579
1420827_a_at	Ccng1	12450	438.388	294.284	454.186	195.899	274.965	190.454	244.067	233.242	139.612	154.025	79.427	91.6653	26.3893	52.2017	41.3093	14.9944	36.3062	8.16047	8.8575	18.2813
1420839_at	Plekha3	83435	295.444	508.187	316.613	305.717	88.1678	130.786	270.863	86.5349	195.807	261.477	123.947	55.8555	120.001	18.5363	17.6118	45.1247	127.47	102.735	120.519	71.503
1420841_at	Ptprf	19268	30.1483	286.05	340.161	545.258	61.182	346.094	360.484	48.1481	11.8473	547.313	151.049	7.6385	116.678	3.57741	4.49094	13.5652	2.96516	31.4131	23.647	11.7485
1420864_at	Zfp161	22666	32.8493	52.9779	85.3531	73.4145	33.5518	28.8578	52.2086	8.97594	27.6498	35.98	8.52114	10.7473	8.58847	7.87331	8.7461	7.03388	7.9044	7.60124	8.25197	8.32117
1420866_at	Zfp161	22666	67.8784	144.277	256.485	269.554	98.6208	125.735	244.867	39.6599	70.3095	139.939	27.748	27.9197	28.2116	15.8557	7.40373	28.0423	10.836	22.3501	7.87552	36.7057
1420889_at	Hccs	15159	4.83283	55.4075	154.807	266.436	7.6277	22.7332	216.241	4.7339	25.7248	203.85	4.91184	4.43774	4.75477	4.82429	4.78033	4.47134	4.74268	4.67928	4.83713	4.73345
1420899_at	Rab18	19330	24.4537	57.6533	143.581	249.769	22.8402	42.3212	164.677	21.0273	47.6485	288.892	28.3308	21.5006	32.0902	22.8068	8.75217	27.4913	9.43848	14.3519	23.602	10.299
1420903_at	St6galnac3	20447	29.8961	20.3832	55.005	72.2756	26.8298	37.1494	50.1748	36.1332	59.8715	82.2502	23.0522	18.2089	14.6564	13.4408	13.254	11.7004	13.4039	12.9081	13.7166	13.5613
1420922_at	Usp9x	22284	82.2501	50.334	127.791	220.702	123.408	93.9127	128.692	114.117	121.904	191.525	28.8232	58.2878	32.0286	13.314	13.0871	14.6195	12.9649	12.839	12.9748	15.0818
1420946_at	Atrx	22589	139.851	67.0029	8.90362	18.4421	104.423	78.0715	55.4738	71.546	25.0256	8.16324	7.08838	10.0793	5.96709	6.2497	6.17192	5.55518	6.15158	6.3479	6.48214	6.48662
1420947_at	Atrx	22589	315.114	262.001	79.8443	421.274	373.535	365.692	743.076	234.547	201.983	86.8567	76.1396	63.4831	18.8691	9.06685	6.29859	9.82565	7.30815	8.61167	9.15579	6.34103
1420953_at	Add1	11518	7.82148	32.3097	63.7866	43.4914	6.54303	32.8253	42.0313	7.02894	40.0061	54.4012	7.86146	7.56466	7.72311	5.48412	5.47409	3.67468	3.31511	3.76084	3.83712	3.31479
1420954_a_at	Add1	11518	106.986	68.9399	21.0769	102.105	89.5682	85.1013	147.279	79.515	44.4818	64.4467	21.973	31.3908	32.0989	20.2288	31.6644	15.173	16.0521	10.4865	31.3449	24.2735
1420956_at	Apc	11789	1334.95	1020.39	1682.15	1832.95	1821.57	1847.78	2041.89	1740.35	2288.1	1821.55	588.827	651.938	522.039	233.195	132.605	105.931	65.858	45.4019	36.9319	17.8321
1420957_at	Apc	11789	278.321	96.1998	41.9043	44.147	498.511	138.748	86.5671	420.021	74.7029	24.9234	53.8743	88.1068	27.6849	59.0335	32.1882	5.91382	12.2819	19.6891	8.32922	50.5395
1420965_a_at	Enc1	13803	628.336	165.592	148.831	1347.63	962.166	255.637	398.225	1014.22	539.879	728.237	290.602	1520.61	437.353	152.023	188.108	68.3168	265.402	41.1963	58.7371	9.64862
1420967_at	Slc25a15	18408	34.7288	9.03806	9.674	62.1933	64.9485	7.00893	27.2424	85.0774	42.213	93.3847	15.1619	39.5811	11.8826	8.53942	8.3816	6.84329	13.5278	8.27832	7.29783	8.23796
1420996_at	Plxna3	18846	8.25204	6.77093	12.8735	31.078	10.2203	14.1448	40.5706	15.4834	22.4336	35.0408	6.59263	7.84207	7.34034	6.10126	7.41493	6.96349	5.91005	5.97517	7.73409	6.00079
1421030_at	Zfp64	22722	126.793	104.779	209.734	47.6111	87.5828	77.4991	90.3915	77.5997	59.7522	42.4982	8.7764	9.32778	6.44843	6.55649	6.48271	6.99066	6.45615	6.42293	6.62138	6.45016
1421035_a_at	Magi3	99470	52.1299	50.9884	8.7106	18.0214	96.3059	56.0176	26.4281	34.0537	11.0738	7.75848	13.1759	9.65833	5.64496	14.2092	10.1589	5.56059	5.77597	8.58978	9.19412	6.5209
1421045_at	Mrc2	17534	102.624	73.8871	175.014	56.2972	69.935	72.2668	69.7892	25.0188	42.3662	34.4865	17.3506	11.4304	11.5743	12.6007	6.00131	10.8987	12.7833	11.7536	12.4321	12.0534
1421052_a_at	Sms	20603	678.882	744.055	1308.35	739.777	456.547	674.858	1151.92	387.228	819.638	557.956	164.659	94.4109	101.562	29.5239	22.0135	32.4539	15.9638	20.3389	31.9401	17.1573
1421065_at	Jak2	16452	93.084	98.1586	244.25	212.069	98.1349	143.858	241.389	77.4373	144.125	117.621	26.6964	33.7208	15.3836	6.09191	6.16786	5.92437	5.80544	5.78725	6.74659	6.13809
1421088_at	Gpc4	14735	246.811	142.008	175.885	224.105	316.75	208.248	267.566	296.238	251.252	256.886	101.127	99.4023	56.2227	15.0249	20.5043	7.15846	17.6982	15.3775	7.03477	6.97652
1421094_at	Zbtb33	56805	20.7029	21.8717	21.532	81.3779	35.4481	36.7337	110.486	107.157	47.985	78.3931	11.9754	23.6471	7.2099	7.76139	6.16493	6.74345	7.0959	6.51718	8.2135	6.72981
1421100_a_at	Dab1	13131	107.693	67.8986	91.4517	129.759	126.571	80.6853	137.818	131.049	149.498	171.809	37.7941	15.374	15.593	15.4168	9.33703	11.3737	9.29563	6.14402	7.36845	15.6123
1421106_at	Jag1	16449	30.7561	47.4054	82.119	108.319	40.093	107.317	130.887	15.978	44.1327	95.8785	9.43113	8.63463	7.80979	7.21085	6.35397	7.65203	7.52969	7.31959	7.96136	9.56897
1421237_at	Tmpo	21917	6.41783	6.90303	24.5374	50.3824	6.28149	14.9611	50.5762	6.87644	23.9727	64.878	6.00023	6.02827	6.37381	6.89202	6.68559	7.45988	7.17759	6.52783	8.87477	6.22392
1421297_a_at	Cacna1c	12288	237.224	181.526	321.451	480.632	202.397	498.899	493.103	274.699	739.428	478.029	84.4569	76.1667	88.4662	14.9794	12.247	11.9877	7.69747	7.6003	25.9691	25.0967
1421315_s_at	Cttn	13043	30.9578	212.991	391.597	196.88	29.8518	171.385	183.762	30.2685	125.242	195.866	56.8191	36.1676	54.5847	37.8788	22.9795	41.6882	13.2199	15.1321	22.016	12.847
1421333_a_at	Mynn	80732	20.2693	40.1684	210.574	146.341	20.2683	111.216	132.055	16.6264	41.3976	98.7855	38.0738	10.9112	20.7221	15.5663	13.7311	26.0652	10.9932	28.2611	32.6769	26.6839
1421340_at	Map3k5	26408	143.265	67.6481	85.5342	635.39	202.965	123.058	341.363	236.753	255.646	453.356	109.92	124.528	105.112	12.8528	11.7917	14.7629	80.3878	92.4616	144.806	96.721
1421344_a_at	Jub	16475	423.746	657.799	1081.44	818.452	620.681	745.757	1457.9	497.075	991.27	1049.33	280.798	208.374	120.946	17.0125	35.9526	31.2825	41.7768	13.464	6.78858	6.56228
1421376_at	Traf6	22034	19.2513	15.416	59.0683	12.6981	33.6213	20.6322	28.6927	10.7089	12.7524	17.6585	5.81925	9.14448	7.10205	6.38295	6.50975	7.85671	9.23823	5.71904	7.68926	9.21219
1421389_a_at	Eif2ak4	27103	51.0819	53.6486	100.307	97.8311	58.1645	46.6791	72.0959	85.1811	143.725	88.9843	21.5191	47.3337	45.372	21.3629	17.1435	11.1133	14.1978	3.72744	15.0014	44.6591
1421392_a_at	Birc3	11796	37.1394	33.6096	42.4507	112.613	18.5105	7.96833	35.2676	27.7134	13.2285	13.824	7.68403	7.53998	7.03242	7.1329	7.07401	6.91715	7.14564	7.04231	7.4237	7.20114
1421424_a_at	Anpep	16790	39.1379	16.4566	39.5826	29.132	53.4503	33.7816	59.0157	42.7397	74.7026	63.0038	6.76453	13.6897	12.9408	4.94591	4.87414	4.56432	4.73939	4.11683	4.34283	4.74565
1421425_a_at	Rcan2	53901	38.6965	12.6045	13.2821	108.759	12.8396	8.71552	10.8216	23.1477	9.8638	20.4121	9.12132	49.7177	9.13398	8.9854	8.86369	3.64376	19.6651	8.7295	9.09556	8.81346
1421462_a_at	Lepre1	56401	102.361	223.736	294.224	84.3995	86.9328	268.203	156.859	68.9886	127.525	47.4249	96.8834	26.3461	45.7087	15.2329	15.192	14.8742	10.023	14.8556	15.2853	13.7494
1421498_a_at	2010204K13Rik	68355	51.6925	21.1563	26.3775	57.8339	46.9551	29.4599	34.8779	80.1582	34.5355	64.6875	19.6981	31.5984	19.1495	14.2461	18.4092	11.8497	23.9835	12.9063	13.633	14.1571
1421504_at	Sp4	20688	77.9792	77.2576	27.2205	110.452	111.543	94.748	154.683	62.4003	28.7985	19.6749	37.8111	13.1144	12.4087	6.46259	8.89254	5.44786	8.04099	8.79762	9.02382	8.29781
1421519_a_at	Zfp120	104348	45.6922	56.7746	111.516	37.0978	30.1922	21.7549	39.9119	25.4887	18.4311	25.7668	14.2989	14.6555	10.8334	15.6674	12.9826	10.9386	13.9141	8.57376	13.7666	15.3013
1421582_a_at	Creb1	12912	29.469	74.3399	186.58	158.579	37.1215	121.173	200.504	33.8615	141.915	152.949	15.6359	18.6911	17.7397	12.9625	8.34222	30.7957	8.00913	46.9884	47.7085	9.75332
1421595_at	Fam184b	58227	27.4019	8.11016	11.1983	24.6205	53.9786	14.5573	18.9681	26.9457	40.7775	15.7658	9.32739	12.0015	10.5641	8.19097	8.08466	7.68821	9.75316	7.98707	4.97491	8.07232
1421721_a_at	Arnt	11863	61.0029	53.6422	133.715	67.7685	76.2587	70.7269	152.113	46.3504	86.2238	86.6437	22.7874	19.0534	13.9374	7.89558	14.5414	11.5464	17.8042	22.5189	15.1619	14.8004
1421797_a_at	Snx12	55988	99.2131	80.158	218.455	283.266	87.2727	163.811	349.461	161.856	303.456	341.929	91.7984	114.133	60.3775	12.2075	8.28938	6.78391	11.9126	7.06644	7.33721	7.1331
1421813_a_at	Psap	19156	126.126	763.979	482.836	628.619	117.108	980.883	478.912	88.5702	173.302	475.16	412.528	102.452	282.421	9.77258	47.749	67.5836	7.21991	68.5545	27.7443	11.5429
1421814_at	Msn	17698	339.698	127.374	196.652	615.352	146.974	76.5783	200.869	190.523	96.1471	195.835	71.4959	170.221	62.6283	63.6178	69.3517	59.6591	62.9262	46.646	64.1708	62.8033
1421816_at	LOC630729	630729	81.0701	360.348	1049.33	2109.15	112.201	361.665	1452.75	112.745	852.706	1952.36	203.982	63.7886	240.205	6.53114	6.3848	18.9003	7.12291	8.78392	31.0096	5.77461
1421829_at	Ak3l1 /// LOC100047616	100047616 /// 11639	16.7629	16.65	53.7879	96.3315	16.8331	19.1157	50.1825	16.9281	71.4924	89.6566	16.8526	16.8844	16.5649	16.9148	16.674	14.9744	18.6851	16.9046	17.1737	16.6612
1421830_at	Ak3l1 /// LOC100047616	100047616 /// 11639	227.695	154.369	410.531	670.197	329.958	183.997	383.606	286.149	443.983	507.178	118.733	122.508	121.999	39.5295	24.8694	41.8747	7.72515	15.5225	34.7	15.1778
1421840_at	Abca1	11303	2149.55	901.781	1665.95	4411.91	3307.53	1351.04	2813.3	2666.78	1932.45	3416.42	766.43	1638.27	878.204	179.877	115.793	69.9918	159.347	159.645	39.6877	187.967
1421880_at	Mtmr1	53332	14.2372	28.2048	66.8108	30.8742	15.1112	39.929	20.9751	9.63573	15.4239	11.2883	10.3884	8.09145	8.19851	9.12541	6.21739	9.39583	9.73308	9.80573	9.84816	6.42906
1421881_a_at	Elavl2	15569	657.12	1034.43	184.05	360.386	464.07	799.741	410.273	351.64	251.896	246.97	157.755	65.4886	51.0809	12.0701	12.3658	11.4551	12.3241	7.62382	10.2386	11.0854
1421882_a_at	Elavl2	15569	4108.96	4444.18	4338.58	2775.93	3962.6	4984.44	4299.59	2177.2	3391.99	2189.67	1082.86	605.58	468.069	79.6735	61.9468	27.2909	50.0353	11.7827	14.2865	39.8743
1421883_at	Elavl2	15569	5368.14	4152.74	4334.5	1856.15	4521.36	3861.4	3393.84	3038.69	2108.87	1674.54	1225.65	834.68	306.091	126.285	116.549	28.807	157.245	9.60477	8.52557	24.4538
1421884_at	Sos1	20662	10.3061	9.31462	10.1142	57.0816	10.3336	9.5456	26.6158	28.0299	32.2369	51.0121	8.07112	21.2181	10.248	6.11947	7.63841	6.80562	10.1705	8.97446	8.5828	10.2955
1421905_at	Tgs1	116940	613.425	334.246	94.6814	341.271	611.316	428.902	468.624	433.635	255.239	77.4916	116.409	84.3129	57.6388	27.8213	18.3462	26.897	19.5129	18.7439	20.4165	16.7368
1421923_at	Sh3bp5	24056	464.478	355.825	424.19	131.015	426.665	446.483	356.834	225.938	227.881	120.8	116.624	105.48	25.7108	29.9812	140.256	17.9501	145.189	52.4748	28.4085	27.2303
1421940_at	LOC100045442 /// Stag1	100045442 /// 20842	113.92	310.388	704.534	578.163	179.655	288.709	591.019	118.445	412.927	613.03	33.5011	64.1264	114.297	29.871	16.2328	29.8097	9.3069	22.0397	25.8386	12.4737
1421955_a_at	Nedd4	17999	1305.05	825.014	1660.61	2609.31	1394.4	1143.42	2784.2	1166.21	1651.68	917.65	389.695	316.605	340.942	52.2828	28.9563	13.7636	30.025	7.57379	11.4127	13.7028
1421963_a_at	Cdc25b	12531	108.427	73.211	144.491	50.6361	181.242	124.497	194.945	85.8167	139.895	145.22	24.6795	25.4283	5.81608	5.4101	4.57951	4.79233	7.03769	6.76982	8.57047	9.16843
1421972_s_at	Hcfc1	15161	19.1104	57.8449	167.455	122.969	19.7943	60.6268	102.02	19.4967	22.1818	99.2218	19.7528	19.3053	19.4703	10.0475	19.6076	13.6378	9.65379	19.451	10.1964	9.24196
1422016_a_at	Cenph	26886	377.758	701.488	939.243	708.082	259.955	477.291	568.47	239.918	423.183	428.715	172.055	232.571	224.724	163.52	106.05	96.4944	50.6065	73.8823	74.4797	77.6202
1422018_at	Hivep2	15273	153.561	57.802	96.4598	457.774	288.975	94.9816	220.197	381.382	268.477	329.037	36.5671	179.338	98.9914	12.9867	5.80607	6.22881	6.75181	5.50336	6.07043	12.1273
1422050_at	Nkx1-2	20231	10.3291	8.8669	7.88545	33.2122	26.1548	23.35	32.7434	65.4763	40.3094	47.1609	7.83587	7.64633	7.11062	7.58648	7.36823	6.83114	7.36973	7.23801	7.80409	7.12148
1422054_a_at	Skil	20482	181.974	308.711	618.938	525.141	233.791	300.002	588.899	200.082	397.056	432.603	67.9032	83.6579	60.2264	21.7615	9.15543	16.719	21.0663	19.5054	21.8604	21.0337
1422064_a_at	Zbtb20	56490	106.325	64.2784	62.4258	186.528	146.424	169.965	149.678	151.681	232.389	117.932	59.1799	62.987	93.2362	52.5845	65.1826	54.9096	25.0095	26.8565	15.7914	70.2567
1422068_at	LOC100045707 /// Pou3f1	100045707 /// 18991	148.68	140.818	129.479	418.138	278.733	365.079	585.86	321.39	353.571	510.41	186.919	75.0952	69.5126	26.1763	8.83159	11.1053	12.5777	5.06821	8.97695	8.83562
1422072_a_at	Gstm6	14867	8.3953	8.62083	10.669	16.7536	8.43651	19.7369	14.3568	29.8451	42.2223	39.2922	12.3666	37.0027	11.3014	5.8828	44.5397	9.6634	14.9079	6.22571	9.28655	8.3658
1422134_at	Fosb	14282	107.024	273.425	243.376	2489.17	95.6878	95.5007	223.542	74.2556	126.41	288.646	15.2908	39.5464	78.9512	8.99906	15.1123	16.3927	15.7004	56.2279	80.8383	67.8301
1422357_at	Magea6	17142	67.2679	52.8547	96.0145	15.7975	42.9041	48.8695	45.9945	55.1674	30.6655	33.2195	4.35438	8.96185	5.31324	4.30842	4.25449	4.2703	4.23657	4.22954	4.36312	4.24696
1422444_at	Itga6	16403	222.386	47.4603	67.611	193.937	252.618	71.176	121.416	239.717	177.353	164.843	37.6398	88.9855	31.5771	42.835	18.634	14.5947	21.8076	28.3133	15.8486	18.4703
1422445_at	Itga6	16403	153.17	64.8288	78.3303	319.473	215.631	108.386	173.14	231.251	166.245	197.068	86.5387	152.62	84.1265	38.5886	37.9163	26.9035	29.6902	12.7939	8.91479	11.4933
1422455_s_at	Nsf	18195	403.733	303.676	452.832	251.607	356.972	452.586	669.725	189.938	282.937	283.201	86.5321	50.3654	33.1325	15.323	21.5376	20.8305	42.461	40.9082	25.4333	17.0574
1422456_at	Nsf	18195	705.841	729.961	1488.95	569.68	769.798	981.747	1214.09	491.003	720.78	606.918	226.023	195.906	179.608	97.7693	72.6299	88.0798	46.5819	62.644	82.87	59.8859
1422458_at	Tcl1	21432	41.0349	12.1414	20.9073	48.7775	34.1011	11.8571	16.1114	32.902	39.7114	25.0926	6.21207	30.2448	14.7588	5.44789	5.996	4.7637	5.97074	5.90134	5.70078	8.2055
1422477_at	Cables1	63955	106.824	99.7104	163.354	191.535	164.386	169.504	257.869	148.979	217.724	167.103	40.8384	43.1449	45.2902	19.9503	20.545	13.2351	14.3979	17.7288	8.77552	10.1066
1422492_at	Cpox	12892	271.047	259.731	391.912	144.498	240.904	178.628	209.711	156.94	132.133	137.643	40.2726	57.0202	23.9948	16.8734	14.7549	12.3734	13.2915	13.3566	13.9441	13.9257
1422513_at	Ccnf	12449	254.067	208.582	215.273	440.856	634.035	626.276	659.246	692.096	755.157	697.797	529.48	238.701	172.81	63.0595	81.1182	78.5344	245.813	368.447	233.584	312.519
1422519_at	Cask	12361	58.3875	52.8075	148.329	55.2884	42.6959	62.0474	77.7727	34.5255	49.6916	44.5483	6.05122	7.25104	5.78924	5.08827	3.02441	5.10241	3.16623	5.1416	5.19246	6.0243
1422520_at	Nefm	18040	74.0364	19.8064	21.1966	28.7955	35.2337	28.3946	64.2537	114.745	108.608	58.5788	14.4021	51.5745	13.9965	14.5049	13.8065	12.7312	13.7552	13.643	14.3818	13.7785
1422528_a_at	Zfp36l1	12192	646.657	518.351	263.891	1084.82	768.58	602.135	730.309	426.364	293.856	443.125	125.694	123.381	117.597	27.9244	31.0201	36.3706	142.548	152.843	118.596	141.973
1422533_at	Cyp51	13121	111.354	57.1488	82.1439	86.1102	130.036	51.2644	104.463	121.906	72.667	102.596	10.5274	14.8354	8.79125	7.15004	7.79674	6.39233	6.91528	6.92355	7.37774	7.09773
1422537_a_at	Id2	15902	115.743	135.066	73.3539	745.272	73.3411	78.7268	117.603	63.4614	83.968	74.4368	25.31	51.6544	24.7365	19.2445	23.9307	24.4091	28.6339	24.8928	25.3671	25.0385
1422540_at	Fbln1	14114	125.2	208.022	320.14	446.139	191.167	233.192	312.593	195.298	331.412	280.087	111.448	87.4155	91.9928	19.511	16.5294	12.2118	13.9551	17.2107	13.007	8.20725
1422544_at	Myo10	17909	14.3934	9.14082	63.8862	124.728	9.27874	27.5088	91.3024	18.0116	66.1464	103.901	8.46758	5.98619	8.905	5.72927	5.62384	7.91995	7.0631	5.66021	5.92128	9.35914
1422560_at	Ddi2 /// Rsc1a1	68817 /// 69994	231.412	220.22	493.323	453.049	361.143	382.871	539.456	317.572	606.011	464.558	124.111	156.575	115.359	81.3883	63.6051	34.4935	18.7017	16.5914	19.4592	13.1549
1422612_at	Hk2	15277	329.399	153.943	220.852	697.466	580.306	327.588	496.05	572.123	570.884	594.728	183.81	268.526	111.106	39.3892	60.9966	10.0127	87.4518	11.4366	10.3814	11.7456
1422615_at	Map4k4	26921	102.812	89.387	94.5492	320.066	173.466	125.932	203.698	243.607	179.62	211.615	64.9426	144.499	69.403	19.8892	12.2035	8.58663	17.8404	13.6671	8.84243	10.1474
1422631_at	Ahr	11622	241.886	199.007	275.667	121.072	226.37	166.034	163.913	116.687	82.7326	58.9395	44.0807	42.0307	14.7197	8.16036	8.13443	6.70915	7.32173	7.30105	7.4456	7.44423
1422646_at	Mga	29808	129.174	74.5919	21.249	74.683	162.841	135.619	142.113	182.219	117.293	44.6245	45.0727	46.775	61.3293	28.5404	16.5553	15.4654	15.5256	25.3857	24.3667	18.0067
1422743_at	Phka1	18679	190.068	158.406	316.267	332.018	322.656	396.094	431.529	262.131	381.661	308.091	122.898	75.7558	40.0915	5.48028	4.06136	3.84657	4.64606	4.05337	4.10835	3.9879
1422763_at	Gipc1	67903	76.9479	211.564	290.146	168.468	62.5109	111.515	174.313	58.0993	129.794	117.199	98.296	32.2822	53.5773	31.1257	12.505	16.321	10.0758	17.923	24.365	11.0558
1422769_at	Syncrip	56403	501.559	589.12	919.495	979.739	513.004	923.34	1172.24	395.548	685.867	869.868	144.683	111.239	212.3	92.2593	58.1809	151.997	28.6689	148.842	200.159	195.357
1422780_at	Pxmp4	59038	63.6738	58.508	65.9607	30.7586	44.075	40.1846	37.3399	35.9357	26.6492	17.2291	4.45474	5.34244	4.35114	4.25425	4.20764	4.09281	5.09708	10.5843	4.30408	4.19682
1422825_at	Cartpt	27220	15.4683	9.587	13.8112	63.0939	25.3217	24.0461	47.3721	47.9866	102.09	86.2479	13.6734	24.8038	20.759	5.65172	5.37154	5.33061	4.48038	5.25997	5.89903	4.73024
1422854_at	Shc1	20416	111.542	128.892	264.716	424.501	132.682	166.777	358.766	136.164	475.481	438.717	111.058	111.697	194.192	102.211	77.7111	119.376	11.9073	11.7692	30.9819	17.6064
1422880_at	Sypl	19027	1606.84	2620.96	3459.78	2824.64	1656.33	3936.46	2766.89	1547.36	3189.12	2156.12	3132.65	1208.9	3900.51	779.167	381.16	1125	179.612	403.352	248.996	501.831
1422892_s_at	H2-Ea	14968	959.16	299.635	58.3982	942.053	539.925	17.4112	6.20543	43.6524	5.68447	5.49406	7.07099	7.04046	6.35753	4.76627	4.85013	5.17383	6.3811	4.70829	7.00053	6.73149
1422902_s_at	Mgea5	76055	16.4484	122.309	327.039	594.776	31.7341	159.865	365.029	16.8839	203.816	461.424	41.377	8.42149	177.536	7.33737	4.11843	67.2298	4.10227	13.9008	42.166	23.9122
1422945_a_at	Kif5c	16574	55.2447	36.0286	16.4142	181.846	88.1837	27.4346	98.0443	72.9444	87.5306	88.3018	21.6848	40.823	34.6617	11.8166	8.97884	8.538	16.1473	11.7929	9.22212	17.5772
1422966_a_at	Tfrc	22042	795.014	579.141	1093.36	264.333	823.41	1307.05	721.702	479.719	440.586	338.084	319.805	70.9499	48.8174	30.0237	15.4745	13.7917	12.2697	5.39238	3.0386	4.19663
1422967_a_at	Tfrc	22042	15.248	55.7999	51.6259	32.2323	8.31224	88.921	74.0909	7.5019	16.2431	18.6144	9.60606	7.20851	11.544	4.51373	4.5482	5.06749	4.46104	6.72383	4.47845	4.52023
1423006_at	Pim1	18712	610.753	886.893	176.412	381.573	320.874	209.403	238.187	322.839	95.7891	156.455	138.916	254.947	93.5067	72.8579	59.3616	39.8001	173.771	178.956	102.344	127.472
1423042_at	Ddx3x	13205	876.141	292.329	414.834	2816.32	1076.36	337.696	893.786	1435.48	948.66	1245.93	256.723	1084.76	727.251	159.638	142.664	63.2475	166.12	53.4571	82.7934	32.3552
1423043_s_at	Ddx3x	13205	1190.23	443.398	486.646	3221.84	1911.41	417.222	1139.87	2310.74	1680.69	1739.42	290.061	1515.46	815.014	215.325	207.257	32.5918	205.858	61.6483	52.1594	56.0411
1423049_a_at	Tpm1	22003	21.2423	13.6788	22.0392	219.653	21.1405	33.2581	52.1705	59.7576	64.6448	104.283	17.4237	41.7313	53.9942	17.911	10.0483	13.2117	16.301	9.9573	29.4707	11.888
1423065_at	Dnmt3a	13435	220.073	140.353	88.9662	141.708	276.243	209.543	160.242	193.768	124.469	68.4002	34.3383	60.4772	21.9335	12.9058	4.88208	4.48832	4.71929	4.66463	4.83514	4.76022
1423078_a_at	Sc4mol	66234	230.939	168.991	348.148	417.222	251.923	194.317	336.167	236.558	358.081	361.222	34.2702	109.703	105.881	15.1717	16.0011	13.8371	14.1914	21.6249	6.59519	20.6703
1423162_s_at	Spred1	114715	32.0056	65.8813	13.7295	11.0578	53.3343	75.4822	29.3608	13.1875	9.68858	11.7631	11.6047	10.1352	6.59476	10.4783	10.3771	9.12826	10.3431	10.0365	10.5595	10.7346
1423184_at	Itsn2	20403	1091.21	756.93	156.959	325.968	1282.51	1335.41	787.286	933.196	430.012	104.374	451.993	195.485	43.9307	45.6097	37.3947	6.126	28.7217	6.70226	5.01328	13.1219
1423266_at	2810405K02Rik	66469	27.1432	4.57536	11.2295	40.4234	29.0184	11.3823	21.3653	39.9643	19.0237	26.4683	26.0277	50.9594	8.21927	8.06144	4.57764	4.10804	4.55756	6.54999	4.69577	4.15295
1423269_a_at	Nedd4l	83814	88.6541	69.0881	68.5938	333.527	150.892	104.413	194.313	202.635	169.228	230.761	34.0367	118.658	81.3278	21.4784	15.158	13.121	21.885	19.7676	23.9365	4.57522
1423271_at	Gjb2	14619	22.3268	13.8412	15.084	34.3226	27.7726	14.5222	21.0125	72.4837	25.1793	54.3728	14.1658	18.1383	13.9074	12.4513	13.9972	13.0018	14.0444	6.24922	14.5889	16.1868
1423294_at	Mest	17294	17.1	15.1437	26.1932	36.2409	22.2569	13.6065	33.725	31.5199	32.8029	50.7907	14.0869	13.1967	13.411	14.0927	11.782	12.7013	13.6241	13.5319	13.9317	13.916
1423311_s_at	Tpbg	21983	135.512	198.045	243.535	472.817	196.496	189.962	480.751	221.357	262.167	614.628	129.691	81.6833	80.3999	16.3114	18.4446	21.0094	19.8308	12.326	17.6129	29.1884
1423345_at	Degs1	13244	169.722	295.176	371.767	459.227	199.783	483.297	404.005	202.191	652.091	369.945	406.478	157.756	627.457	60.6338	36.7276	66.1504	12.8781	15.0988	21.5218	14.0869
1423389_at	Smad7	17131	90.5789	75.0409	62.9103	93.8466	135.786	99.132	132.646	121.986	51.1533	105.057	28.1279	38.5163	13.783	14.2938	9.46213	13.0543	10.1871	9.09709	6.33138	10.3562
1423399_a_at	Yaf2	67057	2094.85	2136.33	3418.54	2281.5	1458.07	1627.17	2543.76	1193.29	2042.95	2333.24	674.75	487.497	398.631	198.938	145.76	158.161	112.477	145.451	166.19	82.801
1423413_at	Ndrg1	17988	27.4886	7.77171	18.5263	62.0626	16.6363	16.4285	69.3403	44.0419	52.8415	47.6549	4.28188	9.3358	4.35809	4.25375	4.19188	3.98941	4.17456	4.14812	4.28991	4.22004
1423417_at	Smarcc1	20588	497.171	401.461	67.5188	563.354	651.755	567.717	804.32	571.661	419.403	171.678	216.49	164.265	123.977	103.723	33.2686	17.1978	20.0213	56.2116	17.5626	61.1353
1423433_at	Trove2	20822	24.5754	38.8918	69.7997	35.116	13.4528	23.5341	41.453	10.4366	9.46792	10.6595	9.94851	9.54478	7.80526	9.53132	9.75041	9.381	7.81866	9.08899	11.2042	14.2181
1423436_at	Gsta3	14859	14.6659	10.0729	12.0239	61.9531	15.6234	13.8123	16.6318	30.0699	40.9987	57.8292	13.7138	33.7186	21.4549	15.6962	17.014	14.8006	13.1686	14.418	15.2852	18.0628
1423440_at	1110001A07Rik	66140	312.066	384.786	481.827	144.424	330.232	533.534	406.209	232.141	248.215	142.183	80.9497	129.926	110.853	144.725	128.394	88.719	48.6708	14.3814	49.9254	48.6749
1423477_at	Zic1	22771	100.52	56.9437	43.6604	117.875	92.6339	28.7859	91.4376	146.662	98.7394	105.933	14.7875	84.2606	19.2691	8.18721	7.86242	7.17419	7.92513	7.24481	8.39499	9.00833
1423488_at	Mmd	67468	44.3496	82.1799	198.26	132.231	30.9825	56.9975	89.0764	16.8958	50.5601	99.0514	6.36313	8.03977	5.50845	4.26927	4.31342	4.06431	5.44151	4.17237	4.30646	4.21586
1423489_at	LOC100047565 /// Mmd	100047565 /// 67468	331.006	222.072	266.027	234.498	294.374	182.808	169.758	253.897	104.538	203.94	50.5778	82.3339	30.4314	20.706	14.0543	10.518	29.6808	10.6024	11.427	10.9803
1423493_a_at	Nfix	18032	128.16	66.8418	186.189	247.727	139.988	39.9389	214.449	135.033	160.464	176.437	18.631	50.3241	45.4485	12.634	10.7005	9.76066	11.3828	11.1033	14.8335	10.4315
1423525_at	Mastl	67121	193.97	120.187	275.918	96.1453	198.429	219.802	273.844	119.101	161.767	147.01	32.3709	66.1127	20.9791	35.8307	26.105	19.1814	22.7585	24.5261	17.8828	23.7544
1423532_at	Rnf44	105239	1021.65	1044.24	1582.62	3013.69	1465.78	1653.38	2216.94	1699.94	2565.29	2626.29	878.409	910.398	1052.05	359.305	373.175	486.006	482.93	521.913	722.067	799.465
1423540_at	Rbms2	56516	48.2483	26.9001	25.0403	155.675	80.6723	36.6465	49.3044	130.429	94.6762	107.508	36.0591	134.63	65.2672	30.8052	34.4315	39.8433	30.4229	17.4753	21.8486	17.5566
1423570_at	Abcg1	11307	220.745	97.9954	97.6099	443.789	285.963	100.059	178.458	348.701	163.013	213.266	119.059	225.717	96.0326	25.0434	15.0814	11.5266	20.9483	13.4819	21.5896	32.3987
1423596_at	Nek6	59126	32.0745	32.8267	75.1296	105.222	67.45	63.6379	86.7081	65.8309	104.792	89.6837	20.7088	32.1732	18.8205	8.91794	8.84571	12.3118	8.91699	13.2683	6.71973	6.18442
1423599_a_at	Pdcl	67466	111.849	166.588	394.23	255.695	117.072	221.597	402.307	97.7888	203.593	177.166	65.4282	63.3303	65.2581	69.7653	43.2486	70.1611	24.8684	31.0831	65.3279	62.6594
1423608_at	Itm2a	16431	30.8562	67.5038	51.235	209.853	33.6048	20.5923	79.1578	22.5595	16.9173	42.2295	15.6937	10.961	8.1941	6.37968	6.31651	8.60889	23.5654	26.0689	16.7157	12.3328
1423613_at	Ssfa2	70599	257.178	457.035	574.743	675.641	267.054	508.812	688.641	212.056	362.062	474.021	144.289	121.769	117.822	37.4563	19.5781	17.5631	17.4794	17.3733	18.4252	17.4662
1423644_at	Aco1	11428	57.2776	20.731	23.1021	157.175	108.862	45.3788	72.9154	103.593	110.428	79.5456	10.8056	80.9065	22.8439	7.14259	6.11453	5.72402	8.97818	5.96696	6.115	5.54702
1423647_a_at	Zdhhc3	69035	117.834	89.9916	111.867	219.167	159.545	139.644	300.155	230.484	187.929	210.654	83.8621	66.8667	56.7364	60.352	57.12	20.2046	40.0763	26.0996	33.4776	27.3628
1423677_at	Fkbp9	27055	514.903	417.553	499.227	2018.65	850.504	732.311	938.529	823.229	1141.61	962.057	425.855	371.548	400.776	58.8513	29.4875	13.278	37.7965	19.4547	14.5052	13.9953
1423680_at	Fads1	76267	462.062	405.428	677.706	285.126	323.75	356.495	361.566	237.737	258.059	195.152	79.7887	116.677	57.2789	27.9563	51.1456	10.1588	51.7957	28.3577	4.88277	7.55547
1423699_at	Ncaph2	52683	164.561	245.552	366.137	135.144	140.354	221.358	199.009	77.9827	168.145	160.61	64.0029	50.512	80.0494	61.966	39.3175	34.0114	21.1461	25.7242	16.858	25.8326
1423747_a_at	Pdk1	228026	174.109	43.4837	64.4347	204.433	190.711	33.1171	97.7008	175.656	142.838	123.241	30.7693	129.888	40.7714	15.4679	22.3488	8.65552	21.8093	7.86988	8.89522	9.24419
1423754_at	Ifitm3	66141	335.209	264.281	150.307	1293.99	132.349	88.4093	358.347	272.979	18.4994	246.266	64.7338	171.241	17.7295	26.4151	104.916	11.4459	224.371	78.2236	34.6834	64.4861
1423809_at	Tcf19	106795	838.962	1113.95	1200.4	381.91	460.327	565.132	391.201	231.781	164.332	118.673	90.1213	65.3247	12.5006	35.1873	34.1011	10.638	13.9142	11.2423	8.25433	11.4507
1423836_at	Zfp503	218820	32.9137	18.1419	19.2108	124.533	39.0767	42.0263	107.437	43.4488	40.7018	46.8821	18.9518	19.0849	18.1878	19.6363	18.4012	17.3534	17.8746	12.5148	12.5584	19.5531
1423895_a_at	Cugbp2	14007	775.043	498.881	776.267	1643.81	1272.09	956.376	1386.21	1341.06	1109.76	1257.53	539.728	495.449	383.692	83.95	42.5575	26.8205	69.015	27.4806	20.8237	19.5816
1423915_at	Olfml2b	320078	10.6718	16.1569	5.46024	151.985	28.9886	11.7429	24.0037	32.5296	59.1015	51.4044	10.3286	25.7071	21.0275	5.38319	6.07833	5.16112	5.23025	5.29504	4.4076	6.69172
1423924_s_at	Tspan14	52588	580.383	434.839	626.459	832.355	747.009	627.099	698.988	707.17	901.41	696.904	254.802	238.574	210.658	36.1055	9.63879	5.33152	15.8158	3.15857	3.22907	3.16858
1423927_at	Slc35b2	73836	127.621	218.438	223.127	97.2342	89.7135	118.394	133.094	43.181	85.037	48.887	60.0121	12.1668	32.3524	10.2667	10.2546	8.5875	5.94707	7.68435	8.63199	8.5653
1423951_at	Tm2d3	68634	522.276	654.01	634.187	522.602	351.876	733.75	525.98	419.503	545.265	336.837	715.546	1214.27	2206.67	693.195	446.216	487.095	19.1678	50.2989	26.3932	9.12159
1423963_at	Wdr26	226757	9.87496	11.3939	103.132	79.4763	11.8488	15.1476	57.893	9.73811	46.9848	92.8543	11.1563	11.3713	18.6223	10.7956	9.83371	21.1481	9.80542	9.77707	12.6327	11.0433
1423966_at	Cd99l2	171486	23.9386	35.1365	7.12719	35.3053	29.3017	23.7918	20.949	32.1062	20.6284	16.6301	5.60912	5.93941	7.18845	4.63677	4.64398	4.39318	4.95055	4.74637	5.62236	4.56016
1423978_at	Sbk1	104175	541.114	292.908	449.969	997.736	656.272	286.82	653.281	605.444	739.823	732.238	125.13	318.065	237.359	56.8035	21.7935	6.4337	28.833	8.01537	8.6364	6.74819
1424050_s_at	Fgfr1	14182	267.411	134.74	246.592	301.679	325.692	247.423	340.025	317.939	373.997	316.835	60.8066	132.566	79.7342	22.4993	17.0886	14.316	17.4978	19.1877	18.4095	49.1672
1424062_at	Ube2d1	216080	13.1243	13.1009	16.7877	82.5928	29.3999	18.7201	45.5221	49.457	67.2442	95.9017	8.75449	14.6997	25.4339	7.15824	7.92183	6.42516	7.9333	7.19812	7.85305	7.01947
1424065_at	Edem1	192193	550.342	498.505	903.076	431.585	401.06	460.481	488.573	297.062	352.856	283.235	114.244	100.001	71.4292	29.6848	42.4525	16.4676	129.977	120.926	92.5389	17.6896
1424072_at	2010107G23Rik	69894	258.174	138.988	173.965	682.868	413.65	152.108	265.994	529.288	317.477	448.171	191.562	403.285	151.365	57.0141	48.3642	40.3379	50.5984	58.5643	39.6435	31.5629
1424113_at	Lamb1-1	16777	228.181	155.951	161.894	792.413	336.259	127.522	135.833	275.127	406.017	328.008	96.3447	287.918	176.743	77.1295	35.702	35.674	62.477	57.7532	46.7134	72.2216
1424114_s_at	Lamb1-1	16777	219.136	112.67	92.697	724.544	297.949	76.0835	148.451	277.066	275.308	200.773	57.3676	338.943	148.66	29.0848	18.078	11.7131	41.9401	31.5661	41.956	31.5224
1424142_at	Ikbkap	230233	136.112	95.6857	11.3163	110.99	138.356	113.794	143.694	143.782	51.9785	40.7875	11.7429	20.3363	9.77332	12.5139	11.3265	6.31111	8.96481	7.19807	6.02483	11.2796
1424152_at	Sall4	99377	1028.51	704.16	888.618	3143.48	1812.33	1242.45	1497.66	2026.68	1496.71	2149.13	641.944	1284.74	685.732	116.634	63.6716	26.3378	110.934	17.6469	16.769	6.99159
1424176_a_at	Anxa4	11746	95.1941	65.4304	95.8141	150.433	134.621	103.211	178.869	182.027	183.064	178.81	93.6929	55.9262	23.6829	7.90436	7.47394	5.40981	17.4467	7.71962	9.40853	8.621
1424208_at	Ptger4	19219	44.5378	21.1065	15.7858	51.9383	40.9193	11.1788	24.5423	10.6698	15.4666	10.852	8.25976	10.8835	8.45837	11.3311	11.2018	14.4306	9.38343	6.63435	7.09176	11.897
1424221_at	Susd4	96935	146.292	68.2796	46.8959	311.887	238.34	47.2522	97.7063	176.231	143.265	118.351	37.9663	179.431	57.5517	35.327	14.6623	6.53848	12.8054	12.0068	9.97775	9.62308
1424232_a_at	Ftsjd1	234728	23.9901	43.043	64.191	15.8377	11.0668	30.9088	44.5634	12.5077	17.9202	23.7255	9.46673	7.40106	5.83964	9.63492	9.55008	8.98083	7.52362	6.21252	6.31651	9.49886
1424240_at	Arfip2	76932	261.628	337.033	396.236	129.856	227.059	253.141	190.658	188.18	137.833	162.823	79.4139	59.9121	62.355	53.6764	69.1917	55.1897	43.0524	48.6819	53.7387	44.6269
1424265_at	Npl	74091	63.0872	101.732	70.6575	147.08	99.3392	93.2888	147.357	167.806	159.923	138.631	134.642	63.3361	47.5445	13.7368	30.9988	9.25124	35.3049	26.4487	21.9847	9.86996
1424292_at	Depdc1a	76131	24.7095	19.7106	41.614	27.5605	38.1416	16.337	60.6775	62.3938	73.8113	78.6109	18.1769	16.6986	13.6314	15.5589	15.577	12.7956	14.8693	14.2933	15.7549	16.1274
1424295_at	Dppa3	73708	9.56102	5.68015	5.23539	23.8948	23.1922	8.98983	12.783	32.1338	34.6564	33.1825	4.86511	9.20091	9.56444	6.81993	4.6974	4.58289	5.69081	5.68561	4.87224	4.54142
1424299_at	Oma1	67013	213.497	167.507	211.581	59.0617	212.671	177.593	130.942	118.184	118.06	63.2024	86.7872	48.5397	37.4226	26.2884	20.9794	9.05047	39.6932	41.1375	23.3104	8.94139
1424306_at	Elovl4	83603	9.48659	8.47693	19.7999	20.2821	29.8638	11.7574	22.1388	12.4598	23.1731	37.3705	8.6169	7.41976	9.03672	8.45447	9.04679	12.0788	9.01256	7.31971	10.1452	9.5877
1424318_at	1110067D22Rik	216551	220.277	140.929	142.05	501.937	461.426	219.698	398.406	428.766	291.883	417.52	147.585	189.305	70.3705	23.0724	21.5375	6.30557	14.9097	6.20484	5.22575	3.40549
1424325_at	Esco1	77805	1239.23	915.415	711.481	1891.59	1362.59	1436.03	3693.04	1216.86	1159.16	931.799	413.278	301.35	504.527	548.747	402.902	315.953	270.113	380.95	178.552	405.42
1424353_at	Lrpprc	72416	685.432	638.575	1726	2107.92	1096.98	1104.3	2270	878.136	1652.43	2101.96	447.754	560.59	616.769	378.328	316.376	287.36	75.9769	154.564	167.905	333.199
1424367_a_at	Homer2	26557	287.286	216.621	247.231	688.134	508.287	314.246	359.043	616.871	487.676	491.899	199.827	296.158	151.957	27.7954	19.3765	8.04824	18.5193	4.93961	3.46417	10.2636
1424376_at	Cdc42ep1	104445	220.125	139.12	129.632	165.807	360.583	153.083	278.669	328.416	276.343	214.238	56.3913	84.5064	42.7947	36.5601	29.6885	33.9058	28.4423	30.0864	36.9472	36.5278
1424378_at	Ldlrap1	100017	170.154	191.278	236.411	204.339	255.642	241.546	267.353	202.472	93.1899	141.811	70.0632	55.742	20.1242	6.77574	7.66827	5.88755	5.95555	7.50209	6.17339	5.95207
1424420_at	Ccpg1	72278	767.904	451.389	877.864	805.308	962.253	730.871	1029.71	863.622	930.639	714.09	277.942	280.236	196.626	61.158	33.4625	13.683	43.1819	11.0165	9.0674	16.727
1424425_a_at	Mtap	66902	241.429	131.873	223.086	69.962	338.768	135.64	70.6617	217.12	114.566	47.9056	27.7578	66.6511	32.3149	19.0008	39.0867	13.6764	39.4148	18.9006	16.5949	17.325
1424431_at	Csgalnact2	78752	216.166	236.068	330.872	189.923	179.707	198.317	252.637	150.661	156.814	108.992	67.0993	44.7252	50.1466	45.5308	26.6831	26.3751	18.0258	9.77436	15.1124	26.5813
1424443_at	Tm6sf1	107769	51.4869	10.6084	28.143	25.4707	9.82375	9.59445	13.3925	13.2911	9.00648	25.1229	11.0654	10.5957	7.7164	8.7197	8.8449	7.41186	9.86781	9.82461	9.35154	10.1617
1424459_at	Lpcat1	210992	73.7413	31.3374	39.3324	110.091	86.5793	32.4158	47.3341	92.9879	94.8697	90.8558	33.9066	46.1578	36.3678	36.5903	31.8798	21.8313	36.0363	26.0776	35.5193	37.203
1424472_at	Nol6	230082	91.1871	45.3116	202.587	219.369	111.73	62.2617	247.537	103.867	252.199	165.234	31.3051	68.3029	81.4212	56.9153	40.3432	46.0489	40.6155	8.88705	20.237	10.8983
1424475_at	Camkk2	207565	119.42	48.7645	49.2409	168.763	166.813	67.1877	94.7972	165.531	98.6753	118.864	41.1377	49.7501	49.3728	28.713	14.1725	25.62	51.5068	65.7107	48.489	44.9524
1424483_at	Mobkl1b	232157	275.557	390.777	373.827	358.257	181.939	342.46	306.999	141.372	251.324	225.856	126.546	63.3424	91.9733	68.5203	35.9682	34.9791	11.2314	23.5947	29.0155	17.0775
1424498_at	Atl3	109168	99.9333	56.8409	180.835	37.2269	83.5577	70.6227	100.38	26.062	59.8982	43.1713	20.3734	12.9022	12.3763	13.5412	13.271	12.1019	13.5783	13.1537	14.4039	13.195
1424499_s_at	Atl3	109168	225.848	205.62	335.252	153.671	180.413	197.498	210.729	113.674	139.762	115.218	63.9602	46.3187	28.423	9.18023	9.06146	6.95933	9.2022	7.64608	6.88964	9.4448
1424515_at	B230354K17Rik	320063	1174.41	1562.36	2359.98	2272.16	1956.5	3354.54	3054.26	2033.26	3238.45	2894.22	1120.46	518.577	604.907	106.3	68.0158	76.4887	49.2686	54.5911	29.633	54.0435
1424531_a_at	Tcea3	21401	207.866	177.943	241.034	350.678	252.725	236.892	376.825	201.636	353.095	313.213	72.374	33.2822	47.3418	26.9307	24.1454	24.8805	28.3844	26.1343	27.418	17.5858
1424544_at	Nrbp2	223649	130.958	158.953	203.884	105.681	103.778	194.497	113.799	52.8711	103.218	40.3315	25.5761	42.8784	32.7108	21.1656	27.3377	26.1969	25.5896	26.2011	10.1349	9.64771
1424595_at	F11r	16456	226.9	107.064	142.575	797.516	349.477	181.012	260.36	285.592	585.657	481.195	157.17	349.105	434.915	92.9179	82.4797	53.9419	59.6733	35.4799	32.4806	35.2885
1424630_a_at	Brca1	12189	20.1118	144.988	345.872	364.02	32.7008	88.6712	195.058	10.687	64.9151	220.998	17.7556	9.56806	51.1585	11.207	9.91342	34.8048	7.51879	46.9744	57.7801	20.0065
1424639_a_at	Hmgcl	15356	258.077	455.103	520.019	148.318	204.276	288.23	201.857	146.244	116.14	120.251	111.571	152.379	104.217	76.3215	112.818	67.4792	22.9151	36.6005	26.7784	19.8312
1424649_a_at	Tspan8	216350	9.34209	9.12203	8.96284	29.5189	10.9772	8.22538	8.58049	10.0067	33.4057	45.1454	11.3846	10.0313	8.81188	9.77417	10.3979	8.92122	9.82698	10.5643	9.72398	9.42394
1424670_s_at	Zfyve21	68520	1937.41	1623.76	1770.2	1173.12	1494.51	1208.05	933.068	1071.69	721.437	639.05	564.585	418.603	197.079	96.8097	105.099	15.9184	128.506	19.8611	9.22195	5.97015
1424683_at	Fam134b	66270	666.426	508.604	872.876	486.789	652.159	538.881	651.749	347.83	432.428	367.167	119.084	116.331	52.5326	13.3466	27.5641	10.4456	46.8319	47.8609	19.8942	10.7222
1424726_at	Tmem150	232086	137.217	90.9743	119.641	268.731	271.774	183.74	304.238	180.432	253.131	251.387	84.5842	96.1447	58.7013	31.9109	33.9074	30.343	21.5993	26.6408	18.5835	40.1869
1424748_at	Galnt11	231050	261.85	461.291	554.09	484.196	197.195	396.452	402.773	168.056	389.526	278.229	158.242	61.6583	67.5168	17.3795	11.6001	11.8453	6.92666	10.4603	18.2118	7.81694
1424750_at	Zbtb1	268564	115.978	150.559	162.497	115.898	137.772	113.887	145.193	65.6915	90.918	93.5705	30.5331	24.1087	13.3349	27.282	14.9275	8.70435	15.1574	8.67802	8.69196	8.70705
1424778_at	Reep3	28193	46.7622	14.884	22.0806	86.8791	34.3332	44.7549	75.0999	26.8876	15.2849	22.9302	7.30565	12.9273	7.1906	3.84033	3.54114	4.60187	4.57134	3.54893	4.95467	7.28744
1424801_at	Enah	13800	173.598	108.629	160.218	745.045	211.622	145.571	301.098	297.435	371.299	506.816	90.051	204.744	74.5064	20.2704	46.7857	15.7193	20.0816	19.4081	24.5799	19.2887
1424826_s_at	Mtss1	211401	42.5966	91.6337	206.13	330.034	42.3291	135.115	303.343	23.4818	191.079	267.954	20.3481	29.8225	55.8274	8.55815	8.42235	31.388	5.15535	8.58979	15.9933	12.2248
1424831_at	Cpne2	234577	35.7839	29.3385	107.579	61.5284	33.746	34.4877	74.3038	20.4449	60.8631	51.796	20.1354	12.2094	7.76443	7.24735	7.13493	6.18468	6.51829	6.45407	7.5198	6.50347
1424843_a_at	Gas5	14455	48.1407	70.3339	181.63	276.275	38.2803	216.384	331.964	65.8336	236.274	276.446	57.2913	43.0866	115.631	28.1613	26.5239	193.064	23.9056	27.426	36.4674	20.6072
1424847_at	Nefh	380684	408.017	293.684	384.885	597.177	583.599	395.759	612.666	743.969	805.627	720.378	238.356	295.241	170.52	101.24	106.388	84.0025	101.131	95.0475	118.878	117.075
1424850_at	Map3k1	26401	287.94	293.386	279.305	277.667	374.314	307.783	460.153	243.016	150.076	159.403	95.9193	90.6765	42.8699	19.7301	17.9513	20.7424	21.664	16.267	14.2743	11.2183
1424890_at	Bnc1	12173	1293.62	790.004	1288.44	2266.8	1968.41	1468.52	2485.33	1862.77	1730.86	2477.36	487.838	601.93	358.767	116.57	28.7599	8.75549	25.8401	7.64279	8.54655	15.0196
1424893_at	Ndel1	83431	73.8922	47.4464	43.9144	72.4805	104.061	171.987	154.003	73.9242	168.885	37.7989	32.631	21.056	56.5901	25.0415	16.5943	31.7893	25.3671	43.0844	21.0528	25.7888
1424900_at	LOC100048058 /// Slc29a4	100048058 /// 243328	48.1252	25.1544	32.597	55.8619	72.7201	40.0484	77.5049	69.2286	67.661	66.158	17.5478	30.6072	16.3244	15.3049	15.0683	14.0557	15.01	13.6669	15.6216	11.0385
1424919_at	Erbb2	13866	114.513	79.8702	84.3984	182.65	226.495	159.998	197.214	203.955	219.142	234.072	97.5893	84.1926	69.0071	19.8255	32.2476	24.8466	26.5639	47.5931	19.9535	9.59058
1424921_at	Bst2	69550	209.755	204.736	124.762	26.7164	136.868	258.059	100.039	123.356	34.8992	47.3871	67.6115	46.6689	15.9555	17.1307	14.2529	13.4375	16.9271	16.8387	14.3403	8.09604
1424929_a_at	Trim26	22670	377.847	367.306	596.162	408.56	300.97	322.336	295.665	240.591	235.824	271.19	101.633	109.702	28.3755	16.9707	13.5107	8.00579	38.2	6.90345	7.93682	7.93158
1424938_at	Steap1	70358	126.485	155.519	372.698	130.38	80.8645	146.549	246.303	52.1606	133.405	110.026	41.0257	21.1567	30.7071	14.2587	18.3914	22.0787	12.0962	14.5901	25.7842	10.8415
1424947_at	Dync1li1	235661	122.566	234.071	346.143	411.724	130.98	225.785	439.23	100.177	150.425	223.391	96.4677	44.2242	48.6012	34.4844	56.7732	44.664	25.1708	49.4815	23.6574	25.1525
1424954_a_at	Pip5k1c	18717	955.368	540.783	768.583	1191.56	1524.45	847.642	1232.91	1398.23	1359.3	1155.98	373.714	557.14	261.328	110.167	61.8784	29.7764	62.1854	15.8597	14.5231	8.75372
1425007_at	Zfp566	72556	113.307	47.2668	88.9018	81.0511	134.86	95.9714	114.313	146.111	140.548	103.458	31.0741	50.8649	24.2379	15.1994	9.08007	7.01094	9.04855	5.87949	6.16357	5.07902
1425019_at	Ubxn2a	217379	151.978	158.196	171.704	149.189	167.636	130.66	158.462	98.1938	91.114	58.8537	30.8129	30.2247	28.0041	36.2507	21.8693	13.4754	24.8997	6.33851	7.50144	29.2439
1425020_at	EG621629 /// Ubxn2a	217379 /// 621629	333.88	230.772	434.908	190.769	282.784	320.488	214.491	202.294	178.555	120.43	38.533	83.217	103.719	39.3313	38.2199	18.9887	18.6848	7.56952	8.20613	21.525
1425052_at	---	---	145.022	155.659	230.119	159.337	153.898	122.791	138.599	149.209	81.1201	71.3646	43.3741	41.5226	29.6661	26.1213	10.1035	7.17008	9.6882	11.0201	5.25081	9.01663
1425094_a_at	Lhx6	16874	52.4367	54.2257	71.4185	124.468	66.3139	63.7946	190.168	81.603	141.463	115.472	8.96458	19.9867	12.1906	11.9804	8.50206	8.11279	13.3823	8.37273	8.90652	8.53064
1425140_at	Lactb2	212442	126.397	44.0524	135.112	27.4051	90.5426	22.7431	52.0264	47.3246	25.6034	19.5021	6.43966	23.0281	6.42467	6.41501	6.0892	5.7818	6.28686	5.76816	5.86313	6.13585
1425148_a_at	LOC100047864 /// Snx6	100047864 /// 72183	1083.23	361.682	213.232	994.486	1476.83	775	1035.81	1865.72	1057.92	836.525	459.798	566.647	369.376	241.085	129.836	30.2832	93.8104	19.8206	8.30969	7.09068
1425166_at	Rbl1	19650	82.3881	53.8914	198.675	74.9589	124.559	94.253	194.121	53.3331	97.1905	84.2914	11.7259	27.6069	28.1348	16.5327	13.5628	28.8587	9.60404	9.23399	10.5338	8.70065
1425196_a_at	Hint2	68917	888.349	736.575	667.73	313.356	678.677	536.394	445.374	446.176	198.982	208.952	212.176	212.137	56.455	91.5333	80.8144	25.0472	91.5034	49.2258	27.8919	18.0769
1425197_at	Ptpn2	19255	148.869	71.3199	114.706	182.737	179.757	161.365	234.423	249.212	171.095	235.935	93.4757	75.6118	38.7318	14.7194	11.4975	6.19639	6.1601	6.14879	6.26983	6.01156
1425209_at	Zfp84	74352	32.1998	24.003	38.2679	19.5011	55.5696	33.0388	58.9688	39.5313	42.039	27.4207	9.55599	14.6703	5.8987	9.22936	5.97575	11.3623	5.96761	6.40981	6.4957	5.96666
1425270_at	Kif1b	16561	169.73	110.536	41.2294	54.6778	166.31	170.251	138.82	146.726	71.1403	36.8622	38.98	17.9894	18.3569	29.9349	14.5837	15.5969	27.3834	37.8532	13.3809	29.0148
1425279_at	Pdik1l	230809	77.7629	75.8228	49.3652	23.1588	33.1295	54.4289	34.4779	31.5539	30.6478	18.2794	18.5368	18.4263	16.3337	20.1201	16.6816	17.7233	20.7485	18.5015	18.8717	19.3667
1425326_at	Acly	104112	74.0584	278.062	660.83	2078.93	141.633	340.441	1008.4	133.766	1605.03	1232.47	185.004	87.8506	612.216	27.9705	14.8966	65.3114	17.7425	17.6425	18.3865	29.0889
1425331_at	Zfp106	20402	364.515	130.812	241.129	729.711	538.161	187.745	479.332	655.574	603.211	593.15	162.06	464.724	323.553	111.545	69.8921	36.6347	153.936	125.508	118.449	46.9251
1425360_at	Mllt6	246198	144.862	77.02	164.35	308.571	206.8	141.24	257.625	239.577	237.682	266.166	42.2198	65.5517	80.5481	23.2351	21.7585	19.3947	21.71	22.8839	21.8395	23.13
1425362_at	Agfg2	231801	177.371	122.681	161.266	77.4201	189.426	248.512	166.873	95.9808	105.598	70.9821	22.0483	23.4615	13.9168	7.44298	7.03458	13.1644	13.5937	7.41157	9.34504	13.8974
1425378_at	Herc1	235439	95.8794	58.736	122.326	40.1406	70.1527	69.994	74.3692	61.8346	63.7504	25.8975	12.9578	28.0912	12.1507	14.9859	10.7835	9.64402	10.0505	9.98779	10.3273	10.7147
1425404_a_at	Tmem110	69179	117.807	139.68	189.384	101.542	88.3521	102.023	117.011	86.5828	102.98	65.5426	37.5211	31.8495	19.3509	7.82055	6.4643	6.56298	6.45998	6.32558	7.00511	6.51616
1425422_a_at	Parn	74108	308.299	191.502	325.079	498.754	315.158	224.953	470.476	312.069	358.617	463.491	74.8888	108.422	93.7694	22.3605	16.6159	19.7424	30.8555	78.692	45.4388	11.116
1425496_at	Abca3	27410	38.781	58.3854	179.823	89.7678	28.4063	100.072	77.2944	30.2408	31.8279	60.8133	27.8887	13.2904	13.7619	29.0942	10.7334	9.64479	14.224	13.3071	11.3231	13.3675
1425514_at	Pik3r1	18708	36.8767	11.123	34.1748	23.5679	39.2349	14.7051	45.2628	24.8921	25.7468	29.785	6.40701	11.2674	7.14514	6.69164	6.11179	7.92711	6.79902	6.56742	6.93689	6.77183
1425517_s_at	Ogt	108155	45.8369	50.6317	141.476	158.464	19.473	48.6454	98.9793	19.1801	67.0698	86.613	10.0647	11.8196	19.1574	6.51197	6.97645	9.24449	5.44418	6.38085	13.6329	12.6071
1425519_a_at	Cd74	16149	2892.83	1032.49	386.837	3575.57	1317.6	53.5187	25.4345	136.257	10.7279	30.3053	9.43414	23.9163	13.2484	13.4551	10.5964	12.8495	28.693	13.218	13.5689	13.2587
1425532_a_at	Bin1	30948	11.9433	15.0293	21.9231	41.3734	9.16911	10.8021	15.3708	31.2658	24.9662	33.2854	9.71029	14.1309	9.08714	9.80977	9.59721	8.7539	9.24836	9.03987	13.0007	9.29058
1425536_at	Stx3	20908	209.728	79.7769	69.6909	440.416	285.838	161.894	206.352	435.101	272.859	312.688	165.972	255.159	84.874	32.4451	13.085	10.2421	17.5372	15.9939	12.1381	36.7409
1425545_x_at	H2-D1	14964	600.531	717.852	709.508	2009.46	459.668	562.046	452.634	461.036	1389.19	349.365	783.717	240.885	343.147	132.091	167.963	154.626	86.921	101.894	134.352	125.047
1425565_at	Rest	19712	685.55	284.404	221.309	1269.18	911.028	346.396	850.378	828.088	838.706	543.853	196.225	397.644	354.614	153.809	89.6322	51.7362	43.3038	30.9085	27.2619	27.6636
1425607_at	Hlcs	110948	26.1943	42.7665	80.3238	35.6616	18.7607	43.7211	40.2196	17.435	27.8541	18.7266	13.1728	14.7993	9.52505	6.71586	9.153	6.98817	6.01134	10.8849	12.4788	5.48126
1425646_at	BC016495	225994	141.42	98.4735	189.176	74.8291	107.485	43.3418	83.6097	80.2078	57.0896	40.4047	21.1515	40.8173	23.533	17.9155	19.7203	16.7944	28.6584	43.4079	19.6722	21.1753
1425650_at	Tle4	21888	81.4387	87.544	224.058	61.294	54.0776	47.3488	125.015	25.4776	74.7606	33.3248	10.6406	12.9469	8.44777	9.49795	8.93679	7.39844	13.2218	11.366	8.84194	8.67568
1425673_at	Lpp	210126	12.2269	12.4726	16.8775	18.3921	56.9497	79.4242	22.3571	36.1556	61.2671	21.3153	13.0809	12.0816	8.47747	8.71877	6.27708	9.97183	12.3404	13.9666	10.5542	12.9351
1425681_a_at	Prnd	26434	22.3655	21.8856	35.4392	60.1393	16.5368	24.3106	31.3871	20.9382	72.5834	96.9448	11.9302	59.9107	40.115	11.6128	67.1025	22.7836	21.8011	24.0593	12.1808	10.2392
1425710_a_at	Homer1	26556	168.555	114.472	41.209	28.0555	100.572	78.2611	58.622	91.8282	28.2563	28.4985	26.6064	15.3427	13.0151	9.92762	8.56915	9.08198	31.1897	27.8395	27.3325	23.8096
1425711_a_at	Akt1	11651	15.0132	75.2872	103.84	312.482	21.2766	52.0669	136.945	34.467	9.58429	219.852	72.038	22.9527	25.6491	9.0644	12.525	19.6288	8.63023	31.9957	42.7595	24.5404
1425719_a_at	Nmi	64685	33.8115	16.6588	16.6948	132.116	43.8268	21.9203	39.2773	77.8563	72.8517	73.4848	33.9713	80.4311	44.271	18.6371	25.3298	9.39889	19.3845	10.1232	9.51973	10.6807
1425745_a_at	Tacc2	57752	526.593	392.138	574.225	1087.13	785.692	846.504	1027.19	827.455	966.534	1055.45	339.918	313.177	194.367	31.7804	33.0089	16.6291	33.8274	6.27859	4.41436	9.7343
1425747_at	Dock5	68813	167.234	66.2241	121.121	264.127	254.45	140.92	187.746	293.477	201.248	184.499	35.6448	99.2743	41.0971	15.6694	18.8926	17.4932	68.0528	20.1342	15.8034	19.9012
1425821_at	Clcn7	26373	24.0687	18.5973	34.6759	23.4535	55.3549	95.8017	77.7474	28.2172	30.3553	29.4423	24.1881	10.0134	17.4294	9.13731	10.0898	7.65338	9.21405	4.82532	8.01156	7.75527
1425844_a_at	Rngtt	24018	218.173	233.582	394.549	181.286	205.631	264.222	266.205	110.331	157.475	139.874	74.6622	46.554	38.909	39.5446	39.1178	44.2502	71.4715	38.8695	44.6917	27.956
1425850_a_at	Nek6	59126	16.1575	20.0744	57.7202	54.2507	17.9223	27.9918	50.9602	13.7607	44.8165	50.9186	14.6049	10.0978	12.8455	7.59888	8.20359	7.92334	8.22185	8.42821	13.3701	8.22281
1425862_a_at	Pik3c2a	18704	131.076	82.4521	216.07	187.804	168.466	171.856	357.492	76.7771	116.484	147.989	73.4691	40.8666	47.9614	55.6926	41.5754	72.0204	72.7951	72.7772	84.9113	69.1291
1425869_a_at	Psen2	19165	43.2023	40.5939	40.2002	39.4783	46.0073	27.4272	39.195	35.9903	31.173	15.7762	7.87869	12.2464	9.69239	7.51049	7.2552	7.25007	6.94808	6.91022	6.88024	7.24595
1425895_a_at	Id1	15901	17.7057	42.3388	34.499	427.149	17.4632	79.7475	184.19	35.0872	44.1428	148.381	24.0267	41.757	19.2843	11.8864	12.5981	10.1934	11.6175	17.1135	17.4437	11.8547
1425913_a_at	2810022L02Rik	67198	47.3957	10.0018	27.4583	35.9051	56.501	36.2408	98.2903	69.5	58.1688	55.2446	15.6644	28.4797	14.4961	13.9126	14.7946	9.26869	14.6229	14.0881	15.0965	15.4763
1425934_a_at	B4galt4	56375	8.73374	26.1224	72.5377	106.989	11.2684	31.7109	76.741	8.64219	84.6873	70.6469	9.41322	6.77576	7.80281	7.2141	7.06074	6.49867	7.02982	6.99003	7.42722	7.01813
1425940_a_at	Ssbp3	72475	584.475	750.338	1691.55	1839.55	738.925	874.887	2318.45	707.704	2008.79	2037.64	491.579	391.651	505.763	117.683	126.593	135.4	122.272	174.936	173.251	90.3504
1425972_a_at	Zfx	22764	201.28	140.944	259.649	230.634	285.123	233.689	357.185	249.804	235.994	259.327	42.2291	33.5659	16.9756	8.65402	8.17664	7.30626	11.7778	9.0174	12.1118	11.7896
1425974_a_at	Trim25	217069	212.194	298.473	593.299	429.506	175.247	174.831	374.194	150.096	276.24	236.439	24.6449	44.0902	42.309	13.0636	11.8295	8.60691	10.3256	10.2054	8.04011	12.5472
1425991_a_at	Kank2	235041	165.942	62.9932	33.1581	101.545	300.484	71.1178	116.029	212.393	84.8293	45.7724	39.3318	97.2278	46.1191	20.9833	6.29545	4.99648	33.33	7.01628	14.2406	5.70504
1426010_a_at	Epb4.1l3	13823	786.467	614.401	352.664	1598.01	1052.75	518.051	992.233	1161	1061.96	1160.33	347.32	554.628	417.746	76.5525	91.4681	39.5003	404.151	190.765	178.098	183.118
1426015_s_at	Asph	65973	103.346	72.1875	139.402	56.4035	63.716	32.0088	38.4369	50.0721	51.6395	43.0163	22.4599	23.6457	11.1899	20.9133	19.1337	15.5023	14.9563	11.1495	14.7794	11.703
1426021_a_at	Cdc7	12545	14.8103	48.2541	62.5456	90.8989	15.1549	33.9485	49.5229	15.1099	36.6101	33.1769	15.627	14.631	15.1851	17.3817	15.0518	41.2767	14.869	16.1636	19.6826	14.958
1426049_a_at	Terf2ip	57321	128.574	124.391	267.683	203.903	118.695	89.2273	231.539	75.2739	144.364	176.411	20.1044	62.7688	33.0231	34.577	39.2223	38.7013	30.8164	27.6803	36.7871	48.0183
1426062_a_at	Casp7	12369	20.0073	52.402	133.136	224.525	20.1753	36.4994	158.058	20.5326	98.4977	171.864	20.8242	18.7897	28.8961	7.29424	12.9922	7.95846	7.15538	12.5099	7.31864	8.53028
1426107_at	Prdm9	213389	41.791	58.29	62.6396	17.9248	36.3599	40.723	34.775	23.9177	24.5038	19.5437	5.61847	4.69036	4.38758	4.88048	4.8114	4.51327	5.42668	4.73431	6.15128	4.54035
1426208_x_at	Plagl1	22634	100.508	80.5432	120.167	327.35	195.204	140.159	272.555	253.952	258.286	326.919	65.9317	97.2171	115.884	8.96605	24.8846	69.2593	21.0643	6.66257	10.7395	53.4249
1426214_at	Imp4	27993	20.8831	14.4185	42.275	29.3659	23.1398	12.496	24.3496	26.0772	33.383	34.7995	13.0311	14.885	10.6064	13.0034	12.9004	10.8182	12.43	10.654	10.3863	12.7294
1426247_at	Stk24	223255	535.465	242.012	270.981	1142.97	672.709	331.651	552.241	830.161	644.563	624.601	196.566	483.625	229.698	76.5617	44.75	25.8793	60.2219	13.0216	15.6151	9.2489
1426259_at	Pank3	211347	269.87	372.953	205.181	145	214.18	464.87	301.07	160.821	59.3412	72.4669	107.805	63.154	19.5039	22.8085	24.1607	14.9915	8.69604	11.1135	13.9589	22.6892
1426269_at	Vamp7	20955	154.98	119.909	144.392	105.313	102.8	62.6315	72.7663	114.69	45.5718	65.7154	31.7694	35.4527	11.1167	7.48895	13.617	6.51136	13.5495	10.4221	11.5317	8.56704
1426293_at	Zfp790	233056	83.794	28.5128	78.0613	96.2582	78.6094	59.7275	142.09	41.3208	55.0876	67.7114	23.0124	19.6918	17.3718	16.1333	14.6374	9.09291	14.5652	9.54042	10.5155	22.3944
1426300_at	Alcam	11658	188.607	244.438	407.904	91.7071	176.058	325.914	201.509	69.7577	251.846	66.8503	85.445	10.5635	33.1969	19.2393	9.89527	10.4098	11.0407	10.8155	13.9558	19.6441
1426301_at	Alcam	11658	133.788	107.3	117.408	35.2233	107.728	155.443	51.1186	70.5239	85.2855	32.3717	128.5	29.7402	13.1174	9.35702	12.2426	11.7948	13.3033	8.38974	13.9572	15.915
1426395_s_at	Eif3j	78655	336.933	191.085	605.21	247.789	346.632	182.527	527.911	352.359	469.436	381.547	54.7069	160.225	162.276	175.89	156.731	84.3465	65.3696	52.1466	89.0466	72.0833
1426397_at	Tgfbr2	21813	149.349	109.015	89.0086	279.677	87.2317	45.7106	100.579	44.3234	59.738	69.8629	14.8353	36.7623	20.6019	7.37451	14.442	25.3283	24.2949	41.2906	25.5475	27.4569
1426415_a_at	Trim25	217069	171.016	127.728	237.463	217.427	246.597	179.253	424.795	216.999	274.676	231.608	59.2927	87.5876	31.5382	10.9684	7.90461	6.31992	6.63208	4.82313	6.89881	5.45312
1426431_at	Jag2	16450	637.725	777.259	728.788	305.077	595.845	848.569	569.933	365.869	329.637	220.083	241.226	187.537	167.256	137.801	110.406	107.139	88.1503	46.2027	51.5551	33.2561
1426434_at	Tmem43	74122	161.785	182.894	320.845	197.521	159.267	228.078	230.794	81.7763	214.416	130.067	43.934	25.1664	45.0177	16.6182	20.4015	19.6054	20.0447	17.8178	14.695	10.4459
1426438_at	Ddx3y	26900	826.475	518.158	1075.95	424.08	632.314	354.056	557.838	378.564	406.167	204.107	124.493	129.561	47.2818	22.5735	44.2373	7.8933	52.5113	9.10433	12.8735	10.0273
1426439_at	Ddx3y	26900	171.895	155.078	328.76	124.752	106.73	160.588	200.038	88.0393	101.876	79.0771	48.3612	21.3914	17.9763	16.8403	21.0054	12.3428	14.2796	14.9896	17.2376	19.3927
1426446_at	6430548M08Rik	234797	36.2745	26.463	24.3277	28.3853	111.043	66.7417	78.9151	37.4071	42.0737	18.6632	8.60208	11.0491	7.37939	7.47254	7.44337	7.11331	8.89766	7.52318	7.66785	7.5652
1426529_a_at	Tagln2	21346	21.3106	13.5362	12.0833	89.8617	21.5028	17.0153	64.3101	34.1319	32.6826	67.9254	24.5236	23.37	15.9506	13.5953	12.4477	11.8482	17.1841	13.5004	11.5812	12.1553
1426563_at	Zfp553	233887	33.9964	20.3055	15.1645	54.5794	54.528	19.2615	56.944	75.3542	32.2778	41.4247	14.3073	15.9653	13.8721	8.19852	6.42774	10.1573	11.2135	6.0013	8.26109	7.64441
1426597_s_at	Iffo2	212632	212.184	122.829	106.547	430.168	423.8	216.273	393.21	367.622	330.443	338.667	81.6121	99.3319	81.7654	14.3924	9.084	13.3636	14.1407	7.53653	9.34363	14.1125
1426598_at	Uty	22290	78.5749	54.5037	92.3008	59.7681	64.9127	25.2294	75.4858	48.1212	25.4492	59.1733	9.6622	10.8009	8.07739	8.23891	8.11168	7.15326	11.9474	8.17533	8.37097	11.6392
1426602_at	Araf	11836	46.9935	70.7769	141.954	71.7418	31.6995	90.5024	61.9626	28.8199	66.4794	74.415	25.5523	31.1966	15.6091	14.5269	15.4846	15.0132	16.6018	16.4873	18.1656	15.4291
1426714_at	Slc46a1	52466	42.9213	18.1049	26.0743	42.0881	78.4528	31.4153	49.4514	68.799	64.9727	63.1526	29.9358	13.41	13.0952	12.0836	13.8527	10.2528	8.56547	13.5602	11.8892	11.3817
1426715_s_at	Slc46a1	52466	21.4442	14.3325	25.3906	31.2387	51.5761	33.2615	41.7457	52.5757	40.3885	37.7284	19.2943	14.8666	9.41804	9.52853	12.4602	9.92665	10.8991	11.4347	9.50131	9.58619
1426724_at	Cnn3 /// LOC100047856	100047856 /// 71994	189.799	150.091	173.428	702.514	268.534	200.769	396.963	336.643	376.117	529.486	142.918	339.163	185.43	50.6094	25.7968	21.7134	9.23697	9.00876	30.6857	6.66064
1426735_at	Iars2	381314	318.811	187.075	329.635	815.311	415.032	255.52	539.395	559.175	703.755	772.671	234.611	390.526	545.951	292.822	187.636	175.083	142.23	105.581	130.538	64.9736
1426818_at	Arrdc4	66412	240.102	249.687	353.456	247.595	163.598	160.812	261.992	87.4525	94.5955	170.737	28.018	54.12	15.5166	10.6845	10.5409	15.7137	13.6161	10.2284	19.0544	7.48369
1426832_at	Ddx26b	236790	93.7699	161.631	256.858	144.133	109.186	199.309	168.242	67.0537	97.7076	82.4341	32.6662	26.2944	16.2436	9.24651	8.61713	8.28196	15.0689	11.9344	12.8397	10.199
1426914_at	Marveld2	218518	204.155	121.79	191.512	261.817	245.051	198.091	324.944	314.424	242.58	232.767	96.7655	87.2241	53.8854	20.8864	13.1715	9.56883	17.1016	10.0861	10.322	7.3103
1426926_at	Plcg2	234779	311.476	117.419	125.063	439.29	449.148	93.2346	203.997	439.741	212.357	289.826	95.5237	354.432	107.857	100.512	87.8982	24.9538	130.036	48.9609	20.3093	16.754
1426938_at	Nova1	664883	58.68	49.9457	92.2373	72.8456	38.7727	26.2923	81.1193	34.9429	32.7756	49.6953	14.6472	13.705	18.6638	14.8593	14.2949	7.53428	6.48808	5.56006	7.2449	7.53158
1426950_at	Parp16	214424	41.3629	56.1867	63.9444	118.273	71.4988	41.1617	63.4365	76.8944	101.372	116.871	29.3213	39.8072	36.1975	16.5062	4.84172	11.4095	13.1185	12.8263	5.4903	16.6926
1426958_at	Rps9	76846	12.6924	6.83765	27.721	13.1627	9.96625	37.261	67.584	11.9427	31.2178	7.23607	7.13009	7.32961	6.67811	6.94728	5.7198	5.54825	5.54821	5.6545	5.66083	5.43984
1426978_at	Klhl2	77113	82.5066	69.8905	117.068	95.5953	45.4022	51.8974	99.818	42.9405	52.3365	30.7574	21.6317	23.2692	10.2507	8.45299	8.87443	8.13508	10.0199	9.5285	10.0938	32.2512
1426983_at	Fnbp1	14269	28.0176	23.6892	42.2698	122.776	37.7716	27.0098	65.3682	31.1936	63.1446	82.9612	16.5994	24.3546	18.9071	20.8792	18.4694	16.7405	9.04752	10.7794	9.32461	13.646
1427009_at	Lama5	16776	61.9735	42.8034	119.228	185.365	103.908	101.094	190.195	84.1388	158.546	179.617	20.9038	57.0471	58.1531	19.5181	29.9683	4.26413	18.7125	19.1882	19.6088	4.6373
1427041_at	BC013712	230787	108.769	27.6952	31.817	188.594	103.962	41.5428	96.0726	177.693	111.988	158.732	28.2353	138.197	39.0921	35.4416	26.5346	21.3393	21.8649	21.4151	22.9912	26.9094
1427048_at	Smo	319757	63.2694	7.98732	70.8061	201.374	96.715	36.4976	134.19	91.3644	191.829	171.747	6.51558	25.3205	13.9892	5.49766	5.28432	4.99868	5.21736	5.27878	5.6355	5.39764
1427049_s_at	Smo	319757	557.965	242.081	282.282	573.511	784.187	310.069	458.727	872.372	677.93	586.6	185.905	227.104	88.2936	26.0323	10.5726	5.98673	21.43	8.47805	5.61102	12.7842
1427059_at	Tmem184b	223693	113.346	96.3031	197.875	190.896	184.87	139.477	241.109	150.126	189.571	184.603	38.8018	37.1951	37.2538	9.23329	7.24616	4.44829	5.4853	3.96525	4.25392	4.99256
1427126_at	Hspa1b	15511	235.571	257.805	384.968	702.032	350.991	445.087	949.175	332.895	819.533	777.071	183.226	109.685	95.5544	15.489	16.8125	14.0694	9.69062	9.59528	11.0299	11.0097
1427127_x_at	Hspa1b	15511	358.878	320.765	392.134	629.544	422.868	454.807	934.919	475.604	929.504	789.5	171.532	147.361	91.4151	20.8477	17.129	14.8207	22.6912	8.10106	10.778	8.40752
1427150_at	Mll3	231051	323.606	122.014	119.829	621.817	640.197	311.928	391.032	727.627	735.274	442.68	176.884	431.094	263.973	97.0203	100.336	63.3183	88.3164	88.9719	46.1886	63.9889
1427153_at	Bckdhb	12040	248.971	407.9	483.724	290.47	240.887	266.858	285.093	126.698	181.362	159.779	105.404	47.3812	35.6699	10.8249	11.43	4.44336	13.6491	5.29918	6.91973	4.66348
1427161_at	Cenpf	108000	5038.06	3099.8	5115.96	6013.9	8266.97	7777.34	9976.52	7954.76	12332.2	10992.8	4161.6	3548.82	3822.43	2457.66	2416.44	3138.74	4286.46	3037.04	4286.73	5773.19
1427163_at	Ubr2	224826	105.252	67.2804	127.11	155.307	167.192	131.987	132.105	145.469	198.966	108.872	37.0831	53.2682	28.3063	18.5343	11.3661	4.25924	13.094	5.34565	12.6383	4.01965
1427167_at	Armcx4	102910	34.8031	8.73678	48.4184	138.744	47.3861	19.6202	91.9226	67.2995	87.7515	69.3882	7.30805	43.5773	29.6699	6.64637	6.6526	6.46723	6.79676	6.41659	6.88498	6.71593
1427172_at	Ofd1	237222	1259.58	681.606	1290.59	937.876	1416.55	991.998	1441.81	1562.71	1180.08	1243.04	383.935	382.601	139.453	75.6648	40.4896	31.6567	149.173	85.3048	110.347	96.4472
1427180_at	Slc27a3	26568	37.4212	22.1911	30.0262	119.792	92.4443	34.8546	55.1649	109.033	59.0613	103.192	39.8599	34.7874	18.6844	23.1941	8.344	7.76609	8.37501	8.35362	8.50419	8.0032
1427231_at	Robo1	19876	236.732	99.6642	101.961	328.673	363.968	203.889	267.735	462.512	160.937	311.41	109.298	183.96	70.8949	145.92	61.9932	34.4679	18.3604	14.335	15.5778	19.2323
1427235_at	Kdm6a	22289	251.436	231.211	449.955	88.8923	228.377	201.267	236.228	128.09	165.117	99.8343	49.0626	20.8096	7.35768	8.82145	8.19231	5.31613	9.56484	7.64819	8.39264	5.63026
1427283_at	Mll1	214162	256.591	247.225	421.235	336.42	364.899	415.666	443.169	173.619	395.366	273.345	115.999	104.354	39.8202	13.2097	11.0505	6.60958	21.6697	12.0977	6.84827	6.63944
1427296_at	Fam120a	218236	575.529	1034.83	1958.8	1617.55	623.128	1165.55	1678.75	413.146	1009.21	1268.39	467.998	162.156	364.015	39.6163	55.0914	62.3605	11.7025	9.35708	9.25845	45.9653
1427300_at	Lhx8	16875	208.621	135.898	146.305	765.982	454.043	327.635	594.367	616.768	562.371	688.254	269.423	202.698	142.592	38.5735	12.3351	9.58883	8.54154	8.0459	9.01418	8.60635
1427307_a_at	Dab1	13131	25.1972	17.1474	16.7504	89.9895	75.3453	28.3196	68.0784	73.4666	99.4759	106.585	9.6442	21.2443	22.1758	9.53271	12.0625	9.09728	9.44379	4.89623	7.09623	9.4163
1427308_at	Dab1	13131	31.0127	12.764	15.0767	54.6786	57.3207	16.903	39.4574	68.3601	53.1576	35.0522	9.41998	15.7065	12.3473	7.23465	7.15391	6.32308	7.11557	7.08667	7.2906	7.14741
1427309_at	Pars2	230577	42.9795	17.0825	39.3939	65.5483	63.3803	28.8771	45.8969	82.5026	43.1411	65.8728	12.881	35.7985	19.6872	25.516	8.14577	19.3183	7.57821	7.56493	7.91795	10.4859
1427319_at	A230046K03Rik	319277	68.0218	94.1371	39.4985	59.6067	61.5238	151.151	86.5108	66.0298	43.8519	37.1794	13.3784	23.7699	14.8599	19.7496	11.7148	8.22573	10.9692	27.0948	11.576	14.0135
1427334_s_at	2810474O19Rik	67246	349.741	180.662	108.02	391.832	334.258	325.62	425.676	459.239	285.673	250.873	132.144	121.494	69.0957	67.2392	27.1881	23.0488	14.1135	23.8206	14.9544	57.427
1427343_at	Rasd2	75141	213.637	136.162	168.119	397.953	318.059	162.922	434.421	414.525	264.727	419.043	143.652	148.425	54.5115	31.9819	18.8543	4.3558	12.4066	18.533	4.62365	4.89362
1427367_at	Efcab4a	213573	26.0618	37.0159	68.7632	20.6216	30.48	45.3331	37.6782	8.55083	17.8151	10.9771	9.26987	4.84794	4.84556	4.14159	4.13586	3.93931	5.64778	3.9001	4.62336	5.59687
1427384_at	Chd6	71389	133.037	48.2207	103.458	125.262	168.968	80.4439	90.4136	161.346	117.363	123	12.0428	57.2445	32.7285	10.6402	8.89691	8.96676	11.7484	6.39023	9.9371	11.6552
1427386_at	Arhgef16	230972	82.9253	41.5163	102.8	44.2419	87.6294	50.9545	43.1927	34.2805	25.2124	24.9109	27.7901	21.5867	21.5389	11.7262	7.64914	13.31	21.6281	11.531	21.9063	11.5685
1427408_a_at	Thrap3	230753	151.234	96.8162	83.064	246.068	157.111	190.133	317.624	142.301	119.547	102.544	37.7559	48.581	67.3767	60.7427	48.5808	39.1799	24.4254	63.9745	26.6078	21.7199
1427449_a_at	Adprhl2	100206	112.453	171.627	96.3111	78.4497	97.8696	152.892	91.747	99.303	29.4742	58.5162	100.828	39.0898	9.22112	7.89909	7.06743	6.06292	7.04471	10.2827	7.05354	7.89985
1427460_at	LOC100046932 /// Taf4a	100046932 /// 228980	101.575	372.9	630.38	295.253	99.4174	386.185	404.302	93.9429	386.869	315.399	132.889	55.7333	110.291	78.3402	51.6193	43.6842	13.9868	18.9437	14.208	15.5057
1427482_a_at	Car8	12319	123.732	64.02	147.806	26.2172	86.8066	59.1699	79.8159	54.8373	28.7079	34.157	21.1895	14.0369	12.6854	10.1402	13.9013	11.9817	17.2645	14.3741	14.9042	19.0452
1427484_at	Eml5	319670	131.833	118.735	207.489	111.508	189.619	339.098	118.845	164.719	162.771	84.3	19.2776	51.2768	24.6712	10.2236	11.4586	5.00036	5.69429	5.35633	5.24529	6.67884
1427506_at	Ppil5	69706	231.71	224.655	357.463	216.823	176.714	253.029	386.212	119.632	203.365	236.51	77.8332	29.143	14.2532	10.4519	14.6705	41.5659	10.0721	9.30206	17.8962	11.6875
1427509_at	Baiap3	545192	112.344	103.693	124.027	25.7487	89.4977	121.169	68.0412	38.0429	35.4219	30.4535	31.4798	20.2042	19.5601	20.3709	25.7231	16.9056	27.4931	31.5853	20.4984	25.9368
1427510_at	Gnai1	14677	217.717	225.313	163.68	241.136	222.54	298.622	390.333	175.159	158.113	126.55	59.0387	33.424	19.9204	18.0252	20.2276	11.6737	15.2824	12.885	9.51981	11.5596
1427512_a_at	Lama3	16774	27.3636	5.12153	6.38957	71.3724	47.9828	5.71873	56.5622	59.2668	67.8092	74.7612	5.5215	42.658	6.52037	5.43508	5.25132	4.55374	6.46787	4.25048	5.50705	5.3285
1427518_at	D10627	234358	27.3529	20.1383	111.446	43.2881	26.8441	28.4743	60.7961	17.9715	15.6646	48.601	13.9792	14.5972	13.8312	10.0973	14.065	10.219	13.3424	12.1537	14.603	14.0074
1427657_at	Ccdc134	76457	15.66	13.6127	8.55938	12.0492	21.2193	58.2737	39.902	11.7702	26.4894	11.7123	12.9555	9.0031	16.8244	6.22069	9.01475	12.245	9.01645	12.5029	7.36801	9.01272
1427672_a_at	Kdm6a	22289	183.431	204.947	210.117	119.112	160.459	232.577	164.792	90.9641	61.3203	88.629	38.5774	22.9799	6.77102	6.90812	6.97279	6.74056	15.3143	11.6925	5.87118	7.99825
1427680_a_at	Nfib	18028	17.9695	10.6921	8.30353	98.6655	21.953	13.7223	47.9495	77.9468	35.0887	65.7808	9.84161	29.0424	10.8108	7.70682	6.99673	5.63108	9.90981	6.15525	7.74055	13.0004
1427682_a_at	Egr2	13654	375.862	107.112	164.573	498.864	237.716	34.0388	59.1354	155.227	70.1716	90.3846	32.2856	49.6439	29.8756	15.8997	12.7859	9.55065	21.3858	19.3872	30.1735	30.074
1427683_at	Egr2	13654	456.956	209.845	160.552	588.181	249.704	67.0788	114.675	185.58	126.563	106.585	70.0735	117.75	41.0274	16.1718	11.428	14.452	21.4878	13.0983	34.5882	66.0868
1427699_a_at	Ptpn11	19247	196.011	141.972	81.348	267.724	208.757	186.195	387.327	155.447	157.911	142.623	42.7124	49.1558	25.632	10.5568	14.639	5.29478	7.85561	8.7129	5.13251	5.30551
1427742_a_at	Klf6	23849	43.5025	103.814	80.3228	246.918	30.9973	66.2717	92.3102	9.62155	44.9421	62.8228	10.2021	9.19104	9.67282	6.12369	6.66912	6.16507	7.25361	7.17476	10.206	8.47523
1427744_at	Ccnb3	209091	16.3556	9.77504	55.0864	7.40803	28.1974	47.7209	37.6812	34.0406	59.1256	11.7765	28.3968	7.38489	5.55285	5.0984	5.85838	4.77783	5.69968	5.08196	5.20305	7.67699
1427764_a_at	Tcfe2a	21423	254.907	1125.32	1118.19	1254.26	330.802	1185.46	1316.24	307.875	235.317	1261.44	448.673	158.409	197.237	43.0485	32.2377	20.3272	11.95	15.8905	22.0873	21.2719
1427937_at	2610030H06Rik	67048	103.611	116.612	163.722	245.939	85.448	95.3671	343.104	98.2702	110.781	73.3153	10.8904	7.50395	6.91591	7.13457	7.05919	6.88956	7.05617	7.14397	7.15468	7.11281
1427940_s_at	Mycbp	56309	235.954	92.7596	258.713	431.686	350.057	178.847	492.878	356.513	322.957	516.725	141.94	170.522	102.305	117.917	71.3495	55.8157	29.1297	16.2921	33.4413	32.0477
1428046_a_at	Zfx	22764	168.499	130.786	189.191	175.223	141.701	174.837	355.493	169.432	265.057	188.149	25.9197	42.721	29.8022	10.0536	9.76157	8.06522	11.0539	25.0216	20.5298	12.602
1428065_at	Slc44a2	68682	24.1924	23.5415	20.7211	83.3449	25.4198	22.8323	23.7996	32.9008	87.5794	56.9724	23.8289	60.1039	39.2894	24.4776	41.8791	25.6386	24.0085	27.4255	21.6304	21.7936
1428066_at	Ccdc120	54648	51.409	33.8699	58.2327	103.238	73.2325	58.2491	96.9471	76.6192	71.6386	79.528	23.1713	22.8676	13.4362	6.65151	6.97508	7.02322	6.30285	7.36588	5.58561	6.6767
1428107_at	Sh3bgrl	56726	74.6975	53.4128	25.8843	191.018	37.057	17.1824	32.1679	34.5413	15.8491	36.6026	22.0966	21.6788	13.1583	7.11397	15.2519	7.44019	24.3851	19.9237	5.54927	28.7038
1428118_at	Lingo1	235402	29.9964	24.4507	30.6268	53.893	51.1746	45.4361	76.373	77.4998	61.0663	80.1208	30.6389	27.399	32.8195	19.1482	17.3699	20.7359	23.5404	18.1955	17.5899	30.668
1428122_s_at	Fam125b	72543	96.0383	72.7037	97.6721	57.2506	144.379	89.4254	137.903	87.4553	91.1224	83.2477	22.0899	12.6918	16.6221	20.5461	11.8993	7.55361	8.93087	11.6342	15.3979	11.341
1428142_at	Etv5	104156	88.8829	68.6107	117.313	242.606	77.1657	77.1134	85.7666	109.974	176.784	188.902	29.8026	55.7719	70.8212	12.8128	25.2019	68.6209	25.1131	18.4678	26.3095	30.1422
1428167_a_at	Mpzl1	68481	1052.24	446.041	556.168	857.088	1291.39	450.722	608.587	1591.56	1157.02	978.594	536.947	1016.86	799.953	396.971	275.397	169.768	242.6	138.751	59.1349	43.7387
1428187_at	Cd47	16423	61.9543	81.9527	93.2642	183.523	46.3879	55.1451	41.0544	35.0412	30.3585	52.3816	11.1967	11.0728	10.8554	4.84007	5.72252	16.0631	6.44266	15.6218	6.30024	12.366
1428210_s_at	Chuk	12675	1261.2	933.116	2156.69	629.982	985.41	797.942	1414.91	714.262	846.668	795.129	65.8809	181.21	132.507	87.4352	67.356	40.6879	40.8693	25.063	23.2022	33.6181
1428281_at	Trub1	72133	60.8415	50.4544	153.817	93.0405	35.4147	44.8113	64.5801	30.2864	60.9785	58.7682	25.7174	30.1432	31.1204	20.816	8.26198	13.7884	11.1713	16.0071	7.89106	7.5572
1428306_at	Ddit4	74747	255.797	153.267	89.9701	264.391	284.85	107.782	96.6566	157.796	62.8045	63.4937	21.7107	282.532	58.377	34.1895	51.8913	20.7195	31.8647	11.821	11.7289	9.46717
1428312_at	Lrrc57	66606	29.0821	93.9587	163.295	75.1804	25.5585	75.7545	107.569	36.2337	54.6405	58.3207	21.407	22.5248	11.6709	12.5438	9.76176	11.0483	13.6427	12.7716	14.4771	15.2206
1428326_s_at	Hrsp12	15473	149.074	79.479	123.597	164.867	154.604	70.5763	164.41	180.22	164.998	148.618	57.3041	69.9553	27.4758	16.7316	9.5411	7.8255	7.49951	6.3291	6.88823	9.43198
1428333_at	2900062L11Rik /// 6530401D17Rik	76219 /// 76976	115.578	87.2464	105.585	152.79	129.445	74.8906	131.783	163.093	119.596	159.901	21.7872	46.3156	16.33	10.6445	19.6576	6.55467	16.3085	16.7913	9.27774	7.71996
1428334_at	Ostm1	14628	346.665	379.952	483.94	250.486	196.928	263.722	269.893	194.712	129.183	151.009	35.9603	130.369	202.487	114.813	81.1878	68.7263	22.6718	6.5876	6.0698	7.62406
1428349_s_at	Ebf3	13593	188.182	209.643	301.644	342.827	279.514	265.348	515.031	276.147	347.197	374.119	73.7276	81.0141	79.2846	8.64483	6.80126	61.4584	7.11877	6.55497	6.96779	25.6185
1428368_at	Arhgap21	71435	395.492	286.002	826.574	1050.99	365.766	285.095	726.851	388.766	1036.68	966.466	125.669	216.612	188.798	17.2397	15.7392	10.3962	12.0403	7.4263	9.0564	10.9745
1428369_s_at	Arhgap21	71435	793.096	485.018	871.385	862.99	957.268	557.183	853.458	904.677	917.609	861.526	218.443	293.35	165.77	35.4359	15.2204	5.59047	16.3441	5.85514	6.10898	6.39221
1428378_at	Zc3hav1	78781	11.6243	12.2685	79.1427	24.9094	27.2721	36.7699	34.3212	15.841	15.2318	23.971	9.74274	8.70383	8.25139	9.56468	9.76251	8.8399	9.57974	9.24538	9.76606	9.58394
1428380_at	0610007C21Rik	381629	413.523	382.609	390.784	528.733	329.243	416.14	376.476	443.783	707.346	371.667	555.355	794.025	1835.94	416.247	307.503	275.372	72.2266	59.0488	63.7687	21.9343
1428404_at	2410025L10Rik	381668	177.822	264.36	266.637	424.705	222.063	355.134	516.259	171.131	205.991	255.367	82.6697	79.1622	83.8117	36.5219	29.1362	16.0866	19.6338	19.4992	9.33538	9.10372
1428436_at	Lsm14a	67070	1051.59	1229.67	2236.14	1533.32	984.546	1134.53	1844	744.053	1377.44	1107.89	377.286	203.965	263.677	67.6502	57.3216	71.7903	149.06	141.737	169.651	119.536
1428457_at	Ttpal	76080	60.62	48.9752	133.229	41.5741	34.7348	40.2202	46.0146	28.7854	34.315	28.1869	9.23142	15.34	11.9624	16.9675	8.52661	5.53983	8.65629	5.78969	6.0487	8.70768
1428459_at	Pramef12	77632	273.793	110.972	142.389	822.743	450.934	266.426	438.111	641.715	616.698	613.967	223.98	363.232	212.515	29.0437	7.27775	6.0624	11.1767	6.41125	5.45113	6.14653
1428460_at	Syn2	20965	65.3913	40.015	86.3784	58.8611	38.5401	21.1537	16.7522	17.3113	26.8511	23.8682	9.57455	17.0861	10.7964	7.31449	9.04548	15.7615	8.57486	9.01142	9.51006	8.56305
1428484_at	Osbpl3	71720	82.9848	32.1316	46.2293	192.525	104.764	23.6931	46.0917	107.744	79.1803	73.0252	27.8994	78.0036	40.8492	15.9495	17.2212	20.4752	21.6686	21.0689	21.9386	21.9498
1428493_at	Sipa1l3	74206	664.947	334.367	505.778	773.34	936.514	530.039	723.807	955.448	862.263	766.506	184.678	386.431	285.901	245.476	179.492	85.9277	189.325	147.125	111.881	116.516
1428514_at	Cpne3	70568	55.0929	50.2103	93.0073	50.8587	33.2409	66.4985	79.5721	30.131	41.6128	48.137	16.1221	8.07082	8.49553	6.69269	7.70338	5.79528	5.50889	7.84294	8.76803	8.97611
1428521_at	Thap3	69876	42.1215	78.2724	78.5889	52.0868	28.8265	59.1839	44.296	26.5365	21.547	27.2619	13.465	12.8414	19.2174	19.8925	19.7181	19.3144	19.6533	21.0709	6.51553	20.1797
1428545_at	0610007L01Rik	71667	15.703	64.6158	216.291	179.63	26.8326	100.163	91.1442	15.9171	102.4	158.067	40.4179	21.2393	33.5974	17.4265	9.39883	19.7265	11.3688	22.052	9.94338	15.178
1428551_at	Trmt11	73681	679.851	494.281	1249.97	1060.48	626.331	373.533	766.32	559.819	370.467	668.588	120.989	211.098	86.9505	90.4681	47.6805	17.7735	19.6829	4.62061	4.92413	11.7838
1428565_at	Unkl	74154	814.607	548.035	1168.15	1278.2	1122.42	966.598	1252.37	839.666	1227.32	1094.31	337.355	389.569	335.837	98.8264	59.3568	86.7088	60.6084	56.39	64.0212	48.6206
1428622_at	Depdc6	97998	116.227	87.5153	147.388	73.8297	103.663	81.2173	96.8433	46.9607	42.9532	58.6722	19.5993	18.9437	20.376	19.6012	19.3525	18.4445	19.1022	18.9708	19.6425	19.3117
1428624_at	2810482I07Rik	67243	390.003	240.968	387.955	307.482	295.244	218.961	289.883	188.767	225.165	151.06	82.037	84.88	55.7097	34.6387	39.437	16.9075	53.5994	31.9171	18.3666	18.6803
1428663_at	Sgms2	74442	67.1215	13.0905	47.7545	53.0897	46.6471	25.3232	54.2923	41.0722	46.0631	63.519	9.99581	9.24704	8.07293	8.48556	7.88461	6.01706	8.30738	7.35314	8.73226	8.36121
1428669_at	Bmyc	107771	77.7914	49.4611	98.2303	23.2728	63.5861	37.1447	43.6156	19.1748	16.0495	20.1222	15.7598	7.20068	5.20878	5.40642	5.39613	5.1319	5.36451	5.36451	5.41667	5.38261
1428738_a_at	D14Ertd449e /// ENSMUSG00000072676	100039192 /// 66039	23.9042	21.7845	72.4478	58.3994	22.1358	31.0264	81.6602	41.2673	58.162	76.6367	19.5975	18.7592	14.349	4.16494	4.11172	10.1672	20.0669	51.8314	48.1373	19.8981
1428739_at	Enho	69638	186.027	75.4849	96.6023	156.171	342.245	66.5708	120.392	326.65	85.1324	137.724	63.4297	87.1336	55.0511	35.6495	25.8571	20.7734	24.9879	5.9565	38.8209	13.1277
1428743_at	Bri3bp	76809	410.888	574.78	418.004	408.743	188.822	319.861	400.361	171.001	309.084	292.98	111.167	95.6567	111.898	15.4323	18.2699	11.591	36.5183	35.6207	15.9163	13.5744
1428759_s_at	Ccdc49	67480	181.643	191.182	446.299	401.463	155.932	222.234	437.813	109.468	271.766	291.296	92.5979	108.646	106.245	83.9879	94.4265	96.4101	41.6796	88.0803	110.009	86.1941
1428771_at	Klhdc10	76788	421.184	280.614	366.998	702.817	789.381	434.811	616.927	871.924	656.726	664.274	291.712	412.208	158.545	48.5354	33.5326	15.9487	64.0111	32.9132	10.0811	6.77464
1428779_at	Zbtb41	226470	204.473	176.091	325.687	150.794	188.168	143.672	198.054	64.4364	109.604	147.058	9.09913	37.0709	29.2056	6.58195	4.91702	37.9833	6.46137	3.71189	13.8596	32.4555
1428797_at	Setd6	66083	910.608	744.156	1276.84	376.09	630.664	720.82	641.461	371.329	368.85	264.888	135.648	164.308	152.86	113.017	78.7994	43.8767	45.1738	23.2085	39.322	18.477
1428798_s_at	Setd6	66083	1096.86	1293.22	2208.82	731.625	792.148	1194.96	1009.16	513.855	704.79	496.287	183.575	195.802	238.925	150.307	83.0742	71.6038	30.0658	34.8536	39.0016	25.8981
1428822_a_at	Snx24	69226	105.773	76.9074	141.134	211.173	172.613	195.844	205.761	131.406	195.291	127.636	46.8825	48.4147	23.4175	9.05076	14.6757	9.43694	8.53455	7.38094	8.1001	37.8126
1428848_a_at	Macf1	11426	363.23	320.59	585.308	1406.76	504.672	539.924	1029.4	659.065	1412.72	920.836	340.712	361.213	326.347	65.8309	92.1147	85.9286	93.6038	69.5216	68.9462	53.1633
1428852_at	Dock3	208869	196.803	171.398	264.319	667.107	456.972	541.428	563.861	463.396	834.69	548.797	281.879	228.91	444.618	115.407	64.3997	97.7127	88.055	137.148	106.534	29.1356
1428853_at	Ptch1	19206	167.366	43.2647	72.0647	534.242	224.975	34.7623	108.383	196.214	176.327	231.873	70.6353	203.462	77.6181	20.1922	10.1556	8.15698	25.8203	23.1772	10.0803	21.8714
1428868_a_at	ENSMUSG00000043801 /// Oaz1	100041965 /// 18245	3857.19	8211.13	6562.22	6939.8	3774.48	9482.48	6920.66	4377.94	6709.28	6216.43	8000.84	3685.9	3684.09	1694.78	1518.57	1397.1	880.015	1626.89	1560.73	811.175
1428897_at	2610029I01Rik	77032	94.8972	90.5845	176.952	38.8907	33.8452	47.2733	41.3524	18.972	23.3561	19.7198	12.3362	11.5375	11.7025	12.716	11.9046	6.7525	19.1476	20.0594	20.331	20.2059
1428902_at	Chst11	58250	35.8098	11.5416	22.034	32.6802	62.0049	16.5682	30.28	49.3797	20.6014	35.592	8.12979	34.8277	10.5248	8.45978	7.09338	6.28182	10.5414	6.92773	7.68997	5.84889
1428930_at	Tmem29	382245	156.168	82.638	120.068	199.294	230.007	106.935	165.693	309.37	208.047	233.537	92.7852	103.812	26.0733	18.135	17.4456	8.16234	13.5298	8.81547	9.39393	7.33433
1428936_at	Atp2b1	67972	1805.48	1177.79	349.746	1236.76	1914.84	1644.7	1471.16	1340.08	930.066	525.274	275.927	253.227	142.618	69.7711	40.7956	10.394	54.5432	26.3188	11.7244	13.6258
1428938_at	Gnaq	14682	36.746	27.1119	53.1885	102.714	42.9151	36.9238	112.193	42.843	70.7465	99.601	15.9347	20.2611	20.3785	13.3546	9.55108	10.5758	6.61999	7.47843	8.08206	7.59185
1428939_s_at	Gnaq	14682	131.242	51.2575	80.4735	123.794	139.279	42.9369	142.754	129.767	108.45	109.822	36.2043	54.8695	42.7964	32.7522	29.1014	13.4226	20.4215	10.9515	17.0934	34.6562
1428967_at	Igf1r	16001	502.76	275.997	338.668	920.506	740.889	516.91	700.396	678.539	654.394	578.864	94.3462	230.14	158.916	38.0465	15.8915	11.3483	12.2414	9.72172	8.86598	21.0784
1428996_at	4833426J09Rik	382051	61.0521	25.429	43.9865	57.8554	76.1625	27.5295	44.1344	74.3093	66.7522	59.7435	13.1865	58.3111	28.8309	25.764	16.2382	15.8092	9.08227	12.181	13.2105	13.5406
1429001_at	Pir	69656	23.9582	24.4277	43.4986	53.9883	12.4788	15.8768	33.6415	37.7195	23.5924	30.496	7.7192	12.7222	7.39678	12.7606	7.48896	7.04777	11.9886	7.382	8.03027	7.41315
1429007_at	Slc35b2	73836	130.837	130.4	159.277	47.4252	80.2973	91.5612	99.5911	43.6363	56.7814	43.2715	23.3621	25.9678	13.7897	12.0343	10.5182	9.75712	11.849	10.2397	7.13252	10.922
1429087_at	1110054O05Rik	66209	190.858	115.997	226.296	208.798	199.892	125.845	224.001	235.504	197.232	195.181	60.3803	70.559	45.1866	23.5367	18.7885	12.0557	17.9192	12.998	18.6235	6.67358
1429113_at	2900092E17Rik /// Prrt2	67278 /// 69017	32.2036	20.0915	15.1845	51.1646	73.5904	28.4577	41.6608	45.3468	21.8719	15.1149	12.3726	20.7779	10.1143	5.79175	5.70654	10.5782	5.73021	5.61174	8.0859	10.4527
1429134_at	Hivep3	16656	16.7759	12.9649	15.716	50.0354	24.8511	15.2703	45.1062	35.0388	54.6682	55.5901	14.2129	23.6663	13.502	13.2434	13.6936	11.5147	5.17082	12.4284	13.2845	13.6201
1429145_at	Nhlrc2	66866	227.487	131.738	201.577	253.128	357.391	217.631	320.12	294.722	267.905	250.818	34.5437	69.3251	32.6545	21.8479	19.9879	12.0069	14.073	11.8372	12.7357	18.6189
1429154_at	LOC100048307 /// Slc35f2	100048307 /// 72022	102.025	47.9053	66.0027	288.739	168.717	96.3078	139.593	217.941	232.481	331.717	107.171	175.684	110.019	32.6282	30.2844	14.0154	35.479	18.9699	11.6651	18.2614
1429185_at	4631416L12Rik	622434	430.168	601.059	698.297	353.626	494.905	536.473	602.675	263.864	237.487	277.15	138.153	69.9256	40.9446	20.5917	13.45	19.5734	20.0832	11.0713	21.4351	64.198
1429213_at	2310030N02Rik	76947	119.493	83.4193	107.013	81.1304	82.9694	58.5504	98.5224	69.2333	68.1784	44.0891	31.1319	28.628	26.25	10.5983	11.4742	5.61713	5.77779	5.7107	5.7248	5.71611
1429217_at	Zfp655	72611	119.97	70.1988	82.8339	154.79	136.511	102.712	189.582	165.29	212.216	180.854	59.5397	81.8361	62.0055	12.2846	7.51073	7.30574	7.57048	7.45846	7.57848	7.51165
1429261_at	2210411K11Rik	664968	46.537	49.7771	41.0228	17.1373	27.3768	46.2371	17.8187	13.9098	13.3464	14.3752	13.4278	8.85312	4.67039	5.74221	4.9592	5.11868	5.47947	6.0611	6.27364	4.95544
1429264_at	C030044B11Rik	68128	409.088	317.172	514.633	327.958	213.298	228.485	206.609	200.62	215.206	184.367	103.591	82.2323	68.0791	33.0272	25.4693	16.8735	12.8409	14.8911	15.8526	16.7737
1429267_at	Acot11	329910	25.3637	14.9002	38.9799	42.0043	38.5222	25.6058	82.1404	88.2861	59.0695	38.2454	22.9154	48.1885	10.289	20.8575	18.699	11.3195	11.7687	11.6981	13.0513	20.1151
1429276_at	Lba1	320429	430.435	409.425	643.416	143.859	444.185	602.43	252.665	379.232	173.692	117.117	228.996	116.756	85.289	37.3428	79.5689	39.8319	127.471	82.1258	61.405	33.3547
1429298_at	Ddah1	69219	238.062	60.5152	66.5873	719.3	505.139	227.51	318.499	848.408	478.895	441.397	245.314	493.839	250.034	42.0005	41.4157	9.0305	37.0629	9.22019	4.74688	4.06958
1429308_at	Prdm16	70673	23.3254	17.7543	42.8212	33.9093	36.1173	56.3991	60.7763	20.9762	35.3758	10.6673	11.1645	10.909	10.9428	6.2617	9.45619	8.10577	9.41406	11.1851	11.1567	11.0169
1429332_at	4632427E13Rik	666737	11.3869	11.6319	17.931	27.7775	14.4583	64.1346	61.4658	11.9507	55.441	10.5785	19.5994	10.4134	39.789	9.27924	11.7076	10.6832	9.7931	8.24422	9.12962	14.8782
1429336_at	Tmem87b	72477	134.144	266.094	244.426	324.803	120.773	302.919	380.325	62.3265	133.671	202.728	97.609	51.2233	71.6228	20.1196	26.2352	40.2748	12.7962	27.8843	19.7911	34.7188
1429351_at	Klhl24	75785	453.321	370.564	585.364	1236.05	637.316	446.847	1019.27	715.823	957.858	1260.33	226.222	328.187	370.432	151.38	106.994	109.436	16.797	52.4924	23.0936	20.0856
1429359_s_at	Rbpms	19663	83.7239	45.0182	33.6137	222.308	86.1803	36.2244	84.4345	144.1	62.9795	69.1881	20.6031	64.7822	34.0184	23.6829	19.6681	15.2502	16.7125	12.4749	13.4429	14.155
1429400_at	Clcn5	12728	232.423	239.566	230.705	142.853	290.341	300.922	256.488	157.916	165.176	127.1	82.3387	62.5293	44.1286	13.7551	16.9639	6.96981	29.2026	13.1827	13.8718	23.4356
1429404_at	2010317E24Rik	72080	30.5307	24.6445	27.9372	46.3522	71.9311	76.0036	100.804	107.302	74.6428	113.557	35.2297	31.3062	18.7802	10.5222	4.92341	7.08659	9.29263	8.14846	10.6286	7.58412
1429418_at	Cdc14b	218294	440.259	221.744	336.041	763.668	629.668	395.36	552.389	762.043	841.708	679.035	177.636	424.827	271.028	258.253	222.986	161.276	122.141	113.401	96.6489	44.1467
1429429_s_at	Pcmtd1	319263	178.457	123.139	185.753	148.446	113.987	117.879	135.609	95.285	73.4581	94.8808	53.3281	32.8856	10.5951	12.0359	12.656	10.1527	16.7718	11.2754	10.8632	19.488
1429432_at	Bat2d	226562	251.219	88.9878	42.5958	294.905	271.001	150.463	397.548	230.001	334.137	67.8202	84.2526	75.6998	66.3233	81.2682	50.0743	25.8335	32.0448	23.6162	24.5152	35.1601
1429489_at	Rexo1	66932	324.273	166.305	110.31	351.905	554.817	244.174	517.549	384.161	379.67	138.97	125.511	127.895	113.57	153.457	115.771	36.7355	86.9168	67.2718	50.7599	70.3537
1429494_at	Trim35	66854	14.5073	9.04157	24.4327	9.76939	16.0872	31.4609	37.8058	8.92319	11.2043	12.5779	8.40174	8.98366	12.5576	9.14222	8.5878	10.3674	7.382	5.49022	7.69849	7.37843
1429497_s_at	Snx6	72183	377.929	258.486	414.073	938.303	652.741	453.458	728.238	794.439	634.041	733.574	309.907	330.614	263.611	157.271	77.2433	31.5017	48.8336	33.6271	21.825	12.2417
1429501_s_at	Ppm1a	19042	33.7468	13.4053	33.1668	79.7396	46.1749	13.6983	41.5849	42.0741	87.7121	45.0072	8.11815	43.4227	21.6337	14.1198	7.81567	7.26173	6.21686	7.33401	8.11231	6.3625
1429504_at	Rnpc3	67225	35.0971	136.432	261.874	129.589	47.5508	160.504	165.44	55.2717	248.731	124.396	55.0353	24.3565	46.6411	38.2221	18.3019	78.9841	12.7097	37.1501	16.4348	32.6793
1429529_at	Tsen54	76265	243.413	375.302	393.263	204.38	278.069	319.208	366.481	186.659	91.0021	203.855	134.77	74.8188	38.2656	30.523	15.9619	7.87571	12.247	7.58978	4.59421	4.47822
1429536_at	Fam83g	69640	100.773	77.4708	46.486	42.8223	107.1	103.7	54.7863	90.321	20.7361	31.5078	77.6586	26.7964	8.54519	7.88102	9.27015	6.29937	7.32172	8.50837	7.12155	11.7192
1429588_at	2810474O19Rik	67246	451.351	255.247	429.501	516.096	524.961	322.031	463.568	662.864	735.531	495.434	238.673	239.297	183.937	107.21	72.5114	36.7017	79.9645	33.5813	40.8589	33.3341
1429617_at	Cyld	74256	416.427	428.218	539.945	218.412	351.808	454.172	384.989	213.509	215.905	213.925	89.1089	70.5675	33.5174	36.993	45.5094	33.3689	51.3847	50.3677	47.2215	37.3578
1429618_at	Cyld	74256	483.501	245.823	570.12	220.001	453.127	376.468	367.942	316.916	234.825	159.058	100.116	107.999	47.2424	97.4662	79.6967	35.3853	30.4474	12.2581	9.51582	9.21364
1429631_at	Sirt6	50721	170.864	112.405	126.732	75.5984	97.5166	133.76	80.5267	79.7561	49.1851	40.969	35.3704	56.4555	21.5758	44.7522	19.7656	10.4356	12.1011	10.8076	11.1749	34.1263
1429658_a_at	Smc2	14211	986.565	989.366	410.392	1246.18	1053.41	1375.06	2439.47	944.232	1183.5	345.017	592.226	294.094	389.419	334.222	302.724	501.099	135.21	659.976	437.927	385.186
1429667_at	Pou4f1	18996	659.231	675.549	1227.46	311.059	581.032	1111.35	572.383	304.775	611.665	344.031	182.022	48.2018	113.672	24.9432	8.42603	20.6317	23.4667	11.3524	22.4388	60.3875
1429668_at	Pou4f1	18996	171.877	247.256	350.752	73.9011	114.502	253.4	209.039	71.2255	119.958	58.5053	10.661	6.82757	8.12602	6.22005	6.1218	7.63658	6.61323	6.00339	6.37898	6.72583
1429690_at	1300003B13Rik	74149	70.3995	46.0036	82.8984	73.6469	53.5625	25.7929	37.6301	40.9993	46.2259	24.9295	18.0506	29.5948	9.51294	14.7364	15.4059	9.89157	19.7213	9.37026	6.97135	15.7916
1429759_at	Rps6ka6	67071	1382.94	1833.6	3962.14	1766.47	1464.03	2270.57	3228.78	831.153	1333.43	1750.02	567.761	175.302	101.096	23.5396	21.1827	10.6899	22.9565	14.0762	11.1519	10.8906
1429775_a_at	Gpr137b /// Gpr137b-ps /// LOC100044979	100044979 /// 664862 /// 83924	50.6679	30.9101	123.052	169.314	38.1521	48.8814	123.621	39.8201	124.453	122.977	14.1837	19.2887	14.5324	8.73984	8.59309	7.47022	6.21626	11.3004	9.02276	18.1365
1429782_at	Grcc10	14790	106.521	124.736	121.572	198.346	77.8441	407.972	475.658	60.7002	294.746	369.614	21.9082	13.0097	36.3886	13.2699	10.2625	11.1688	77.6024	114.599	85.6797	21.2941
1429784_at	Mapk1ip1l	218975	165.463	164.446	191.3	131.547	184.23	299.341	235.8	123.933	148.128	58.2862	46.8971	45.0156	74.2387	28.1112	32.3534	72.8731	27.1067	39.6929	36.2045	44.6515
1429810_at	4921505C17Rik	78757	84.2612	84.8187	20.4315	44.773	111.835	135.954	68.2085	98.5928	35.4074	13.9483	23.3862	21.8127	14.6776	22.4564	22.6106	15.0518	6.16404	8.90533	5.46538	27.818
1429818_at	2410012M07Rik	71979	86.38	128.924	207.198	355.942	118.949	97.761	262.065	99.2465	237.161	207.441	31.4605	53.3139	59.2165	13.8975	12.3655	42.0981	14.9325	7.96742	10.3735	26.2858
1429831_at	Pik3ap1	83490	143.748	46.2229	96.932	195.294	249.825	115.98	193.088	178.398	176.351	203.54	31.816	39.7793	8.03084	6.83551	7.90568	6.02457	7.83896	18.2983	7.18686	6.30256
1429895_at	2310010G23Rik	69591	104.416	37.2531	136.696	60.0087	98.336	68.8481	73.899	61.2103	52.6853	46.2313	8.74494	6.45401	4.95549	5.10244	6.78639	4.73334	7.2335	4.93497	7.44749	7.20742
1429951_at	Ssbp2	66970	46.2003	20.0782	35.4399	22.7939	72.4341	85.6493	62.5093	40.1348	102.293	26.9461	22.9607	19.6199	19.8555	6.78784	6.38084	7.37335	6.46535	6.24112	6.70706	16.5657
1429967_at	2600002B07Rik	72343	42.6621	28.1439	29.3895	53.682	87.1698	89.9342	62.7912	45.8574	28.1172	46.4986	31.0937	30.4228	26.6001	26.1995	23.178	25.5519	20.0728	17.2745	23.2463	18.1867
1430053_a_at	Ola1	67059	1190.99	1042.82	1748.57	3197.38	1222.41	1480.38	3203.75	1951.63	2625.09	2351.95	911.122	998.996	942.347	559.499	385.878	374.485	98.2945	188.445	243.606	205.254
1430117_a_at	Zfp64	22722	37.2554	41.865	72.4115	16.3274	7.69802	41.2333	36.6105	10.4045	9.02814	9.05535	6.3681	6.17256	6.20487	6.36148	6.30434	5.96352	6.28483	6.18467	6.35815	6.31603
1430127_a_at	Ccnd2	12444	88.1338	81.7719	64.6581	618.818	169.068	91.4964	190.107	314.542	342.024	299.259	69.0523	264.402	143.786	27.9608	15.951	21.4446	7.73271	5.93552	35.5693	5.99352
1430133_at	Tbc1d8b	245638	400.128	342.018	603.748	239.868	351.524	285.948	395.418	257.949	317.515	157.847	110.702	73.7774	18.3766	8.92816	16.7969	4.66721	10.7414	5.15536	5.17867	4.97632
1430144_at	Avl9	78937	85.4547	74.6392	155.627	64.6056	76.0336	66.3598	92.5538	53.2812	64.064	67.172	11.7393	10.3735	7.51947	5.78919	5.46411	5.44006	9.30602	7.50375	8.82243	6.10902
1430150_at	Dcp2	70640	274.74	277.607	483.75	154.782	169.789	261.14	302.365	139.976	140.703	145.374	79.0669	41.5389	17.8081	10.2225	11.0333	9.79318	21.2082	28.9393	16.3589	6.58115
1430151_at	Nisch	64652	63.5487	75.5283	35.1239	26.1504	69.3635	214.632	93.5713	31.2572	101.472	16.255	7.96468	9.23401	11.3017	5.72985	5.67363	6.27095	5.6528	5.54119	5.80468	5.67847
1430160_at	Ankib1	70797	383.947	375.286	528.678	145.299	277.797	291.362	250.642	197.977	168.39	164.599	108.718	86.0006	57.9956	60.1454	57.7723	40.1119	53.7405	34.6454	40.849	59.2795
1430195_at	2810043O03Rik	72697	128.857	49.8933	88.1737	29.7021	205.63	242.742	32.5619	120.536	160.736	47.7406	37.1672	38.7491	22.9624	6.7046	5.61554	6.69387	18.3086	16.7822	13.4878	18.2497
1430264_at	2610030P05Rik	69258	50.3885	42.3967	24.702	22.9576	62.2075	314.867	22.3277	28.1147	128.322	23.7672	40.123	27.8099	40.8895	25.4971	21.8076	24.2314	22.1835	25.7507	15.5876	23.5763
1430291_at	Dock5	68813	58.6223	15.7264	60.4102	165.781	84.9878	28.7118	43.6665	82.2505	76.7153	91.3015	23.0202	50.8461	20.641	16.3153	18.9052	10.9601	6.42794	5.80129	7.68134	5.53218
1430328_at	Polr3f	70408	92.7777	63.9451	42.9767	30.3997	165.26	177.44	70.304	101.995	65.6488	36.8237	52.729	25.6397	19.3385	5.96467	11.0786	15.7763	15.431	9.78234	5.17307	19.4962
1430353_at	Glis3	226075	313.942	67.3093	92.2786	333.928	328.398	52.2195	86.8565	274.343	173.596	126.686	55.1539	379.13	118.281	46.1974	41.7766	70.4416	52.3914	50.8429	38.1656	36.7947
1430357_at	H3f3b	15081	53.661	144.286	192.517	209.584	75.8488	280.98	424.389	51.1789	120.13	161.603	66.4562	21.3417	42.4846	11.4614	9.16123	61.1975	20.3921	32.0569	33.4281	54.2576
1430384_at	Tle4	21888	8.97293	8.96754	16.0506	7.68215	10.655	65.2057	28.3878	8.54676	24.2511	8.12944	11.2298	8.86868	7.96875	8.83881	8.02413	8.10191	8.62339	8.48877	8.86102	9.46242
1430401_at	3110045C21Rik	67303	102.518	33.9884	62.5172	104.806	89.7272	16.2269	30.4395	119.714	44.2878	51.9721	14.952	38.037	7.3654	6.66411	5.80288	5.34552	5.51302	5.38044	5.95501	5.58797
1430491_at	Bop1	12181	106.207	128.638	245.126	162.352	201.45	441.934	385.465	102.638	519.62	163.522	53.2178	42.8126	234.631	28.1686	19.5501	88.9047	36.0371	68.279	179.251	72.8116
1430533_a_at	Ctnnb1	12387	13.0792	40.7277	63.6652	151.696	8.35351	82.0046	65.5998	8.66352	35.5856	54.4995	6.56312	7.8271	57.6102	7.941	7.04471	7.54004	6.33123	7.71882	8.073	6.48905
1430538_at	2210013O21Rik	70123	276.234	244.478	277.681	129.956	177.467	144.231	115.602	142.913	79.2802	71.6226	67.8683	41.3577	6.87325	4.77434	8.18832	4.45043	8.03098	5.43443	4.81896	4.86212
1430568_at	Zc3h13	67302	532.777	203.401	176.831	648.036	616.542	322.154	1091.81	376.083	334.762	213.682	25.7145	52.413	63.2261	40.4977	20.8014	19.2205	19.5838	16.7613	19.3328	21.1795
1430577_at	Haus2	66296	445.294	336.04	443.541	202.844	332.329	253.366	412.358	154.364	186.157	90.8755	53.4307	42.1485	53.4391	47.9683	12.4598	11.9901	12.2337	16.7893	12.4222	17.9028
1430697_at	Ammecr1	56068	370.003	201.281	158.889	165.066	361.807	258.525	302.982	239.426	158.693	54.4783	21.1643	23.4729	16.6798	12.7973	6.08821	4.60185	8.69682	3.43184	3.69335	6.68128
1430701_a_at	5730528L13Rik	66665	150.994	234.82	526.289	619.816	200.237	313.647	734.525	222.096	549.323	635.203	139.551	58.3435	110.547	9.37242	9.26705	35.7418	27.4361	18.5475	42.9942	14.4872
1430775_at	Wdr44	72404	33.4598	65.7822	30.1645	13.2114	58.3967	72.4109	93.4597	20.717	29.4675	14.1832	24.4946	16.2687	12.0692	17.2225	10.7199	8.6365	13.7421	10.1354	9.92088	29.0429
1430955_at	2810403A07Rik	74200	12.4505	13.1248	43.16	14.4238	23.9321	35.9001	44.9748	19.1417	46.1283	12.4985	10.9492	9.31081	25.6779	9.55433	8.43349	11.164	8.49693	7.40903	7.94063	9.98714
1430971_a_at	Aqr	11834	49.2529	14.6529	8.1309	16.164	41.1262	18.0683	42.4079	57.2126	21.3402	27.6036	10.3812	10.877	6.9538	23.8051	7.86436	5.30181	7.24717	8.01518	7.82708	6.70831
1430980_a_at	Eif4a1	13681	1699.3	6187.96	8233.65	14988.3	2242.94	9908.14	12380.5	2432.57	12706.3	12653.3	3290.77	1250.39	6912.55	500.61	290.657	1455.68	81.3532	609.04	1256.07	728.28
1430982_at	LOC100048559 /// Sfrs1	100048559 /// 110809	512.763	2624.29	3751.75	3307.35	585.452	2348.91	3810.48	555.388	949.45	3555.76	1134.07	649.32	1225.38	619.775	359.238	588.587	48.5535	329.543	179.176	186.726
1431032_at	Agl	77559	678.026	597.045	1640.01	704.041	481.271	472.328	1186.43	297.231	572.556	554.967	126.518	165.022	157.639	168.972	110.67	43.77	22.7352	16.541	9.69172	16.0065
1431033_x_at	Agl	77559	614.152	547.964	1440.53	632.202	541.876	541.338	1118.63	346.45	599.092	592.168	57.9905	156.377	133.958	179.496	77.6572	35.803	19.8325	21.1955	7.9127	25.4596
1431047_at	Chd6	71389	42.8533	22.194	6.74889	26.26	44.1681	30.0493	37.0999	35.9656	14.2616	6.24527	7.44817	6.71752	6.78651	7.57913	6.9453	6.41982	7.27156	6.81612	7.11174	6.91804
1431062_a_at	Exoc4	20336	63.5479	25.848	46.238	53.4058	63.8023	74.3761	125.061	92.8881	68.7965	72.7054	23.9872	35.4436	9.50887	11.858	18.1725	16.46	15.6666	14.6806	19.9437	17.4349
1431068_at	LOC100047670 /// Rmnd5a	100047670 /// 68477	41.9725	28.1797	44.1194	27.5402	27.8133	33.1395	40.5367	23.9837	14.4747	15.967	6.79797	6.78609	3.88864	10.3671	6.58451	4.16884	6.93853	3.87979	4.4033	4.09082
1431098_at	Clip1	56430	215.128	167.825	60.6168	250.557	216.569	262.785	485.228	186.751	203.398	74.3663	53.686	31.263	29.4415	9.20297	10.8664	21.2262	105.689	197.208	40.9396	73.4172
1431115_at	Tgif2	228839	5.98082	25.7069	37.7068	100.682	6.69796	30.8247	60.2379	5.97933	22.2445	53.7323	7.60531	4.67197	8.51918	6.08903	6.03293	6.29514	6.14304	6.57723	7.62327	6.8143
1431160_x_at	LOC100043371	100043371	169.434	143.558	206.153	129.731	64.4823	126.171	114.919	41.2156	60.8842	55.4866	15.9301	7.42034	14.8513	5.70091	5.61809	14.3651	5.1409	5.04115	5.29153	11.8261
1431212_a_at	Trmt6	66926	655.466	448.956	141.535	874.248	533.242	449.259	834.687	518.832	219.988	394.099	213.513	164.647	73.8091	34.2394	25.3543	10.5303	32.5537	34.0166	7.28198	10.9533
1431225_at	---	---	82.2386	96.1654	29.6207	48.7835	95.7421	188.765	81.1432	40.4501	75.6012	25.7361	15.7694	6.85775	6.98701	6.87406	7.91495	14.7226	4.46184	5.3498	11.3507	28.6667
1431305_at	Mcoln1	94178	30.7667	82.3034	102.437	33.4667	14.1516	137.832	22.7178	18.3155	33.1504	17.4769	16.3167	11.7289	13.3147	13.4496	13.1954	12.8597	13.9758	13.2197	13.5545	14.1687
1431320_a_at	Myo5a	17918	137.165	82.8767	181.987	180.467	131.373	109.448	228.209	149.307	247.019	241.84	32.9854	77.0227	59.2935	29.3941	24.1517	19.113	21.299	6.60833	8.71825	7.76791
1431347_at	5730407M17Rik	70480	78.6253	83.042	33.998	105.579	91.5888	323.759	349.955	81.5254	257.183	143.155	117.438	49.9816	94.5455	58.9396	31.1473	32.314	27.1548	28.8677	24.9373	27.1726
1431355_s_at	Trpm7	58800	225.75	196.899	271.253	97.1372	246.712	602.646	210.334	190.189	182.885	101.712	126.648	36.3449	75.5339	22.5111	28.7144	21.9817	50.1137	26.6177	22.5608	122.689
1431385_a_at	Mbtps1	56453	275.244	233.743	360.324	169.889	225.792	236.163	212.737	178.318	177.638	87.0486	71.8682	73.7334	26.6933	40.4962	26.4497	24.2556	48.2741	60.3307	37.3588	12.103
1431386_s_at	Mbtps1	56453	155	101.811	134.978	31.0751	143.156	88.466	63.2578	93.4203	50.4771	40.193	17.9665	33.8622	11.1755	8.59382	8.38857	7.41199	11.5424	8.49896	9.91553	5.75619
1431403_a_at	Mtap7d2	78283	3097.73	1250.28	1639.35	3065.71	3060.85	1621.61	3471.78	2340.48	2867.51	2147.93	660.415	732.462	409.955	87.2487	79.8693	10.2822	39.7695	18.0039	26.6332	10.777
1431422_a_at	Dusp14	56405	129.445	113.247	324.379	278.714	116.224	199.512	319.629	122.17	246.227	264.515	46.2186	63.2214	56.9059	7.36759	7.19244	4.9759	4.92694	4.84384	6.30957	4.8461
1431597_a_at	Nrip3	78593	87.7808	121.195	193.393	41.8317	74.5313	137.585	173.984	43.6502	126.363	58.0828	44.721	10.7981	14.3276	17.2513	16.6508	15.2602	12.1449	8.80526	9.83842	10.8728
1431707_a_at	Cyth3	19159	90.5893	102.876	28.5199	26.9343	16.1166	24.2331	28.2417	25.567	13.5965	13.294	3.83826	9.16393	6.42842	12.5169	12.1194	5.91987	20.8084	11.0894	8.75332	12.0658
1431711_a_at	9030409G11Rik	71529	18.5385	15.3306	11.8862	39.1108	25.4874	17.3517	20.4721	27.5869	28.3223	48.0167	12.7304	13.6095	9.66257	5.03712	9.00085	4.63552	8.94735	5.00643	7.88501	5.71942
1431768_a_at	Prmt3	71974	45.3258	75.5289	92.3423	48.0287	25.0095	36.4794	78.4928	34.7557	33.1388	80.6423	24.3496	18.3504	17.9837	21.0288	19.7422	16.902	20.6632	19.074	18.2401	22.7711
1431804_a_at	Sp3	20687	1106.91	1246.2	1919.05	1417.99	1452.12	1396.17	1833.78	1277.29	510.523	1355.92	509.166	289.194	191.139	248.986	148.445	95.5194	69.8052	46.9521	30.1833	76.7365
1431805_a_at	Rhpn2	52428	248.143	157.126	336.532	368.578	267.136	269.269	468.967	276.205	537.535	423.852	96.4948	83.4375	24.3793	13.7135	14.8938	13.2134	16.4121	12.8082	13.8148	13.5529
1431875_a_at	E2f1	13555	545.944	499.861	673.729	551.607	313.502	272.745	498.079	328.68	195.148	281.467	152.084	148.806	72.0085	46.0031	34.8683	34.327	47.8113	34.6595	49.2978	34.612
1431892_a_at	Plcd3	72469	54.4086	40.9223	45.3827	27.5837	51.6217	71.2734	57.5779	20.7414	22.6123	30.6642	15.6682	10.2829	10.3967	14.6738	13.6583	11.4984	15.7066	9.1314	14.5903	20.8892
1431893_a_at	Pdss1	56075	248.127	203.808	371.663	148.985	224.261	220.875	233.012	165.279	218.15	106.684	23.9669	65.5097	54.0358	26.2211	6.65466	6.1122	6.60704	4.90585	6.91501	7.73948
1432006_at	Ap2a2	11772	58.4235	31.8982	35.171	36.733	75.7322	80.7299	75.5503	47.2192	50.4764	49.8945	22.6429	20.366	14.928	5.57532	15.332	11.0374	5.59285	5.46671	5.93363	10.3232
1432007_s_at	Ap2a2	11772	290.614	161.713	227.684	183.336	424.448	377.928	366.913	240.118	201.614	185.789	81.7281	53.6902	96.1043	21.6495	8.00223	23.0392	15.1783	16.9237	11.1693	22.0379
1432018_at	Ascl2	17173	94.4302	44.9715	44.4126	97.8833	157.341	85.4278	171.471	160.899	141.38	186.616	71.8582	47.2158	20.9701	10.436	7.59421	7.24416	12.2546	9.85963	10.4732	7.54305
1432034_at	Neurog3	11925	47.2914	5.40994	7.21147	47.2735	99.4655	9.62745	14.5082	59.8838	10.9769	18.3279	7.08567	66.5397	12.4486	6.23266	4.87831	5.51816	5.2149	4.84504	5.42758	5.65444
1432052_at	Exosc1	66583	49.3225	23.8919	70.9784	79.986	55.8855	19.7524	67.6289	47.5557	46.4845	66.867	14.591	31.7233	13.5166	6.90666	6.76243	5.09395	5.41337	5.54719	5.59214	5.39943
1432158_a_at	Trappc2	66226	936.823	662.711	960.616	478.931	746.223	468.391	552.525	566.827	451.779	428.571	140.023	117.431	49.3611	10.276	14.1066	10.8023	15.7279	7.93972	8.54031	6.87697
1432410_a_at	Bmp7	12162	7.7201	8.92671	89.8345	115.841	15.5451	15.7822	109.516	8.65748	35.296	115.608	8.15153	6.24587	9.20446	6.87669	6.34666	7.19089	6.31959	6.61376	7.06801	7.67404
1432411_a_at	Fbxw2	30050	47.2964	209.096	345.461	224.577	65.2978	245.955	162.938	41.5286	165.87	199.633	57.5364	21.0071	47.9477	21.3971	16.194	15.7491	16.8493	16.7454	16.489	18.2336
1432421_at	Pms2	18861	10.8806	18.8421	13.546	22.6009	20.85	43.3622	29.4271	13.9448	21.8459	9.58746	5.71702	5.25341	5.34926	5.34116	5.28854	5.09245	5.26008	5.24036	5.38579	5.3659
1432489_a_at	Wdyhv1	76773	32.5603	41.9254	217.693	198.092	39.1503	46.8469	149.995	52.7795	133.681	141.435	31.9186	17.8579	33.3729	10.1341	9.25098	9.94782	4.60986	8.99752	12.4104	10.71
1432910_at	Btbd7	238386	88.3631	70.7777	106.53	35.6958	150.889	364.646	76.4898	58.3719	71.1706	34.339	43.9266	54.5463	44.3572	32.2423	35.9796	36.3493	28.8055	29.5838	27.6446	36.8682
1432995_at	2900057E15Rik	73021	25.6215	27.0904	81.5826	17.8168	47.5235	68.2572	40.5108	21.3074	47.6593	28.0513	15.4314	14.2927	15.0393	15.2985	10.7896	8.72732	10.3228	10.5892	15.4573	10.7558
1433184_at	6720477C19Rik	77731	81.5662	131.448	61.4891	62.5268	121.792	377.271	92.3322	111.966	102.389	68.0167	55.0039	37.4168	13.9706	4.87632	5.16554	5.01088	8.99061	5.43486	7.01396	27.2147
1433446_at	Hmgcs1	208715	59.2142	212.868	533.244	351.382	60.9912	159.971	305.175	52.6469	166.241	380.716	63.2996	37.5586	72.9871	37.5212	27.4384	51.5292	10.9757	52.6246	53.6345	52.8832
1433450_at	Cdk5r1	12569	105.431	111.978	368.08	257.774	125.994	169.393	291.982	104.477	270.295	251.465	58.6153	62.4733	43.7672	44.7989	31.4595	29.8427	30.6661	17.3247	22.1791	28.5498
1433453_a_at	Abtb2	99382	836.22	309.759	527.851	154.399	944.585	207.48	486.213	721.744	405.526	308.02	148.137	192.57	42.5364	47.6006	62.0969	27.8999	240.731	124.01	68.1675	32.9475
1433460_at	Ttc7b	104718	47.0999	25.3434	155.789	80.0788	34.8699	32.6397	67.4691	21.7845	116.941	37.408	10.5284	9.69671	11.3569	9.02665	9.42057	9.34118	9.03969	7.54671	9.42484	7.57768
1433468_at	6430527G18Rik	238330	6.27997	5.34384	23.2407	139.727	12.6073	23.4862	111.677	8.61085	105.602	130.857	6.35965	6.58559	27.3373	4.60035	4.43109	4.46252	4.4122	4.47453	4.53281	4.1882
1433471_at	Tcf7	21414	644.138	704.221	1028.85	2134.32	937.284	933.712	1851.09	1073.45	2073.33	2021.35	593.058	563.529	547.777	138.72	55.4791	62.0742	45.1122	35.3579	45.2325	23.4204
1433506_at	Lrrc8d	231549	52.1769	25.0917	60.167	120.083	71.7965	19.1507	73.2964	98.3697	79.304	95.9243	20.2156	42.4809	23.599	15.4828	11.9337	10.26	12.2786	6.19519	4.99871	4.81011
1433508_at	Klf6	23849	36.8745	41.5594	39.7205	95.3863	23.0117	25.8152	42.579	14.4188	13.9981	29.0097	15.1727	10.0734	7.83998	8.07633	8.39095	7.01056	9.74198	8.00634	6.76415	11.3348
1433532_a_at	Mbp	17196	20.5079	6.18103	6.0096	49.7556	29.7165	6.11664	8.4344	33.3105	24.1932	23.8249	5.66673	20.8394	13.5063	6.09839	5.86421	5.03038	5.41273	5.22675	5.45915	5.25715
1433555_at	Eaf1	74427	624.791	664.793	1608.25	899.672	521.148	560.245	1027.9	372.766	797.692	666.652	137.278	215.611	282.045	184.498	109.097	95.8781	27.6967	38.8993	29.9568	30.7654
1433576_at	Mat2a	232087	384.765	1336.85	1645.2	1643.6	454.512	1598.4	2357.25	543.87	2955.73	1998.08	968.059	315.459	1260.51	239.923	208.259	494.526	47.7563	155.11	141.251	259.419
1433581_at	1190002N15Rik /// LOC100044725	100044725 /// 68861	183.372	63.8808	207.668	161.075	203.07	97.2964	169.592	164.29	51.8207	111.788	25.0661	45.5425	37.6724	37.2931	25.2142	28.8003	22.9147	15.7912	15.3338	15.1026
1433589_at	D6Wsu116e	28006	85.3779	96.0926	26.1481	103.868	97.715	99.7751	127.719	69.6697	35.3273	33.5812	21.4395	34.5655	10.6729	9.5849	6.54126	6.3857	6.19996	5.51936	5.04915	9.43849
1433590_at	Herc3	73998	53.7961	52.9535	92.875	70.2729	51.6117	25.6553	109.317	38.1146	45.0578	24.388	25.0651	16.2762	10.1257	18.2543	11.1033	8.81377	12.4764	10.0486	10.8525	15.4518
1433613_at	Pank3	211347	681.126	688.413	1584.16	672.158	639.955	941.105	865.826	383.208	720.734	460.735	238.888	212.641	129.502	102.707	60.062	23.5865	31.7028	4.60369	5.49863	5.45165
1433628_at	Coq10a	210582	55.7334	71.5998	100.945	24.8476	38.3511	26.6391	24.6923	27.4878	18.7606	17.9061	14.8128	12.0016	8.1037	11.2536	5.89609	8.10605	12.8074	15.6334	11.2443	13.7626
1433640_at	Fubp1	51886	137.018	177.314	339.444	151.021	121.772	194.203	224.673	117.574	310.59	57.6032	66.483	52.6028	57.9038	42.1027	36.1913	32.136	39.4931	69.6283	64.8045	40.8361
1433672_at	Trmt2b	215201	157.667	139.245	253.055	143.53	94.7748	87.0048	141.21	160.081	82.9622	111.592	52.1189	46.478	28.0294	26.0342	18.7772	20.3178	29.06	16.5913	25.9189	25.5541
1433682_at	Arhgef17	207212	218.622	110.777	275.069	127.749	175.416	123.15	117.298	84.1162	95.4497	67.1965	19.9829	49.137	16.2838	12.789	9.07237	4.27198	12.5504	12.5072	4.51841	4.67622
1433687_at	AI662250	106639	80.3588	98.604	131.389	46.3987	58.7696	28.7075	33.1883	27.9102	47.0386	38.1933	23.1163	22.995	21.3896	22.3006	27.1837	11.9659	9.66998	13.3936	17.7698	12.0586
1433691_at	Ppp1r3c	53412	41.2457	28.5302	43.3462	78.603	33.2265	61.3286	67.9726	88.8796	99.7797	85.4796	13.8154	32.8715	12.68	9.49528	9.6388	9.18818	11.1306	5.10022	9.25933	9.3652
1433696_at	Hn1l	52009	1229.36	1160.82	2617.28	1744.23	1109.49	1040.99	1656.51	862.298	1204.28	1405.35	290.219	370.974	295.777	110.958	27.7406	28.7252	21.2143	13.6074	15.5961	21.6449
1433699_at	Tnfaip3	21929	65.1043	38.1237	89.5859	145.588	38.5891	26.6333	40.6791	23.9054	47.7652	45.0563	20.8437	8.01378	9.0672	9.23427	7.29912	8.19857	22.6216	21.1676	35.0171	19.6568
1433715_at	Cpne7	102278	8.98731	28.508	28.4506	18.3985	26.5782	18.2895	25.1696	38.9468	26.6923	32.2097	13.1449	8.79009	8.77464	8.88648	8.82645	8.03233	8.76127	8.4248	9.0165	8.78027
1433739_at	Nol10	217431	725.383	336.85	650.952	580.383	1047.25	663.026	856.932	960.268	740.92	773.527	348.332	271.447	135.134	123.041	88.5394	111.005	94.679	106.135	110.979	109.257
1433742_at	Kank1	107351	21.9978	12.9691	17.5659	80.542	18.1807	16.8303	43.8515	33.6961	59.045	36.9541	8.6114	13.5026	12.318	8.59573	9.7087	9.24597	13.6806	9.59292	9.86843	10.6532
1433757_a_at	Nisch	64652	369.351	141.106	122.747	117.193	366.5	190.456	167.746	180.22	170.681	53.3572	15.6979	41.9733	14.5583	10.9068	13.7152	8.23309	37.4182	8.67621	9.15864	12.0306
1433758_at	Nisch	64652	84.4944	114.652	99.6482	106.474	100.177	228.849	116.722	76.6363	136.028	30.6139	29.841	24.5271	31.0189	18.0212	13.9278	49.7424	5.38217	4.24679	16.2897	5.39994
1433804_at	Jak1	16451	378.275	172.093	16.1492	86.0257	396.071	186.377	161.16	337.154	180.758	23.2721	108.358	96.9712	36.7586	20.1136	9.69356	7.05731	9.92169	9.68654	7.41862	7.26477
1433825_at	Ntrk3	18213	22.21	18.1574	31.846	22.7691	65.2922	63.9031	78.0172	28.2947	81.6764	45.561	26.7122	17.4047	12.4165	12.8218	8.74889	13.7173	12.643	8.32871	13.0037	16.4818
1433844_a_at	Dusp9	75590	187.951	113.377	176.799	317.315	239.738	165.413	366.65	344.273	511.453	349.42	170.863	111.131	93.1533	40.9275	28.4067	22.052	24.7323	31.6182	26.1256	14.0556
1433845_x_at	Dusp9	75590	637.915	465.975	534.611	928.524	1123.66	624.069	1159.22	1229.9	1369.4	942.393	469.547	346.673	182.679	41.1174	23.9241	11.3578	13.461	11.8961	7.78293	7.35743
1433883_at	Tpm4	326618	371.366	392.374	588.638	542.958	210.404	210.87	390.07	142.355	82.8617	110.578	66.552	54.6865	27.2786	10.976	13.4862	12.9345	26.6839	25.0282	13.9517	53.4518
1433924_at	---	---	387.298	324.385	533.391	237.847	226.425	281.426	183.336	146.354	193.155	86.9337	50.1582	114.161	112.173	107.515	46.6906	16.0198	13.1277	6.97694	7.23068	11.8584
1433931_at	C030046I01Rik	109284	224.983	212.403	761.8	276.857	189.255	63.3341	390.115	57.9718	216.335	213.611	43.5276	44.8349	63.7283	52.0526	47.4393	51.9492	47.2285	41.2661	44.2652	16.4716
1433932_x_at	C030046I01Rik	109284	254.399	173.429	648.268	286.017	181.019	171.747	437.637	92.6866	236.097	201.461	39.0461	46.4789	88.5329	47.2078	38.5532	29.8239	38.3481	30.8033	32.2241	40.8134
1433938_at	Trp53bp2	209456	28.8481	77.5116	182.901	146.793	27.8895	63.9446	161.728	25.9759	141.869	152.898	48.8825	9.5928	31.5133	12.235	12.298	13.6893	12.4529	11.5783	12.7295	12.7997
1433939_at	Aff3	16764	336.463	65.8134	88.699	990.7	625.327	84.8536	228.167	634.68	382.193	469.744	45.4738	551.352	224.682	51.6982	30.0454	18.5533	29.9142	12.5506	20.1098	18.9622
1433962_at	Trmt61a	328162	336.61	370.948	335.88	160.954	287.446	262.396	203.688	230.677	193.112	105.184	76.8474	112.389	62.4892	100.841	77.1593	37.5709	53.138	30.1519	30.5264	53.1621
1433971_at	Camta1	100072	80.2191	36.8225	78.379	217.007	108.863	63.0394	106.934	116.915	128.562	114.708	28.9102	111.507	43.54	17.1576	12.0235	6.43848	12.1461	10.0458	12.9469	6.74685
1433972_at	Camta1	100072	103.321	38.5784	62.4123	200.887	139.516	83.876	152.057	176.602	137.624	145.85	37.8213	110.111	67.8874	33.8762	18.1274	17.0333	14.7027	13.5157	13.3515	29.7613
1433979_at	Rbms2	56516	17.1426	10.9554	8.09758	62.7731	20.5396	10.5197	11.3638	25.7132	25.0706	40.6514	6.17829	30.2274	10.983	7.80977	9.09602	7.80913	11.0071	8.80372	7.83995	4.40241
1434002_at	Foxn3	71375	269.061	137.253	202.699	430.275	365.352	180.028	340.763	316.741	305.035	244.654	68.1337	118.182	85.6295	17.5655	40.684	23.7401	74.719	18.3724	17.7794	53.8242
1434007_at	Gyltl1b	228366	182.054	59.0842	65.4981	604.847	187.544	67.1379	170.022	212.898	230.947	215.668	68.9634	230.359	103.805	24.6771	21.1767	16.6729	53.9107	42.4483	45.3288	41.1708
1434027_at	Rcan3	53902	182.909	50.4587	146.997	495.718	213.553	79.011	211.887	218.135	273.096	246.009	13.0439	113.123	80.9245	13.0669	6.30059	4.54349	5.14871	4.61262	4.63556	4.11435
1434029_at	---	---	149.722	74.0821	157.282	184.199	203.462	112.905	235.883	195.461	262.23	187.066	68.0327	67.4817	65.2402	23.1199	24.1682	13.3617	9.04959	5.14515	7.28951	14.5782
1434045_at	Cdkn1b	12576	72.7932	24.1781	35.6354	190.086	88.7318	22.1153	29.2535	109.105	105.092	94.1401	28.2935	83.4866	28.6622	20.1676	22.1872	15.8173	31.5682	19.0699	19.4355	19.1808
1434050_at	Vps8	209018	89.2068	208.705	160.559	164.304	124.976	251.483	125.721	88.087	92.5767	132.39	201.2	57.7673	57.7791	23.3885	16.0066	26.5712	20.8038	27.2127	24.2851	34.9789
1434061_at	Rp2h	19889	16.977	17.4407	58.2447	28.4759	25.3513	15.4554	10.5973	13.9596	9.38672	9.86036	7.60885	8.96538	7.88503	9.60963	6.79066	5.39655	7.05722	9.22587	8.37202	9.91698
1434067_at	AI662270	103814	269.379	43.0675	126.831	154.708	133.493	30.0449	38.8927	203.463	54.3088	135.936	33.8811	83.9477	28.38	30.9243	11.7727	26.6313	11.2621	21.0782	32.8818	35.0623
1434068_s_at	AI662270	103814	38.4561	19.0592	46.1609	109.047	16.6196	9.14887	31.6119	47.4942	32.8282	47.574	15.7929	28.3077	9.81259	6.13305	8.71826	6.20185	11.0772	8.62778	8.78872	11.6828
1434070_at	Jag1	16449	687.16	498.005	634.453	427.412	657.7	540.837	526.163	513.247	446.945	162.437	89.4763	138.466	74.7353	21.2926	19.5728	38.6835	33.7761	12.6128	20.5876	17.2348
1434097_at	D10627	234358	57.0057	27.393	106.165	35.2424	57.2566	51.8053	44.9229	44.3137	23.5402	25.589	10.4747	12.4909	7.5624	8.09689	7.82423	6.82135	7.83843	7.573	8.24332	7.94036
1434123_at	Fut11	73068	56.8515	20.8029	73.8727	72.1362	56.2865	21.3146	47.1108	62.2289	63.4196	42.5118	19.645	30.8469	19.2996	19.8795	19.4301	9.59045	9.70018	18.3318	19.6728	12.5106
1434129_s_at	Lhfpl2	218454	17.7958	9.51967	9.64246	68.7845	27.5373	9.57165	25.5695	22.3033	40.7038	25.2764	9.93551	10.7056	16.1778	9.76189	8.77478	8.33001	8.74861	8.10291	8.63475	8.81935
1434144_s_at	Wdyhv1	76773	373.106	347.484	669.751	601.814	289.503	286.316	456.471	215.659	403.995	393.57	147.054	124.986	144.048	33.0786	24.8203	20.8974	17.8054	11.2343	15.2092	11.3868
1434153_at	Shb	230126	173.267	118.847	97.314	320.531	321.337	143.626	252.61	289.013	327.969	310.984	125.43	189.478	110.109	29.1692	23.609	24.8132	46.7029	61.21	37.6576	27.894
1434178_at	Mll3	231051	407.651	178.046	233.117	1123.4	639.534	581.568	714.722	829.411	1113.01	1078.8	355.969	707.858	431.166	124.462	140.996	105.04	115.1	83.3543	94.8754	101.145
1434179_at	Mll3	231051	386.043	226.157	347.922	1165.09	658.063	545.048	631.913	888.07	1154.63	930.829	389.175	752.084	499.029	180.844	163.589	168.772	72.1271	80.5379	134.68	86.0372
1434180_at	Fermt2	218952	596.631	507.635	779.633	466.566	491.605	491.59	586.017	422.722	304.395	230.127	96.8264	145.384	47.0844	16.3841	35.623	8.1523	41.1883	11.1983	10.3707	5.37591
1434184_s_at	Map4k4	26921	199.692	61.3807	145.35	716.276	285.221	148.332	228.538	308.091	333.616	377.956	88.6704	308.875	149.479	46.2384	59.1276	13.2239	54.0106	34.706	10.6812	10.226
1434200_at	BC010981	407830	111.199	69.624	181.421	85.5208	107.057	88.0783	88.9136	38.0665	85.7484	58.5311	34.7011	41.2867	14.4314	19.4574	13.0747	12.2499	9.91238	9.28161	10.1447	9.85618
1434201_at	Chrdl1	83453	33.726	20.0498	36.933	37.4663	29.9184	24.5495	39.852	63.8796	25.6006	63.5967	16.7643	19.6082	10.992	13.325	13.6421	10.8996	14.1731	12.8049	13.7407	19.0389
1434202_a_at	Fam107a	268709	16.2769	8.27575	7.651	45.3233	7.04444	17.9039	80.4797	38.2058	7.0101	48.2855	9.76134	32.6166	6.27646	6.11843	25.8434	5.08417	19.9338	6.36257	5.43389	6.08206
1434208_at	Rnf169	108937	75.1937	47.9643	33.9613	19.7591	85.3527	71.7833	37.1641	68.7173	31.056	21.896	11.2418	18.0075	11.6849	18.5859	10.2926	7.26214	7.48356	3.86607	8.26247	7.9112
1434219_at	Stim2	116873	225.369	243.589	394.667	208.718	211.016	278.482	319.588	112.651	208.308	210.142	55.0758	51.538	47.1787	21.6076	24.9259	19.4226	23.1927	18.5143	7.39022	12.5908
1434221_at	Mical3	194401	104.262	118.767	249.077	236.509	192.149	133.934	227.197	185.828	278.862	236.46	44.6845	103.043	67.5464	16.7375	12.6363	19.8994	32.7169	34.7219	41.036	29.3569
1434232_a_at	2610030H06Rik	67048	70.0556	17.5916	67.3782	24.5188	86.5859	28.8296	27.3938	60.3342	37.5267	39.7619	5.36288	15.7997	5.16755	5.41584	5.22948	5.12136	5.53134	5.034	5.2663	5.00783
1434288_at	Bivm	246229	17.9421	29.2555	39.3936	32.7671	25.6232	25.0949	31.056	23.2378	13.6563	24.7431	6.52075	8.15283	4.58509	4.65667	4.61914	4.49206	4.60023	4.59426	4.64157	4.62525
1434294_at	---	---	99.2996	140.147	246.061	119.241	169.932	196.727	217.012	96.1477	134.653	119.605	29.1933	25.8692	18.3461	13.6435	15.3399	10.8504	14.9	13.0296	15.2511	17.4742
1434337_at	ENSMUSG00000051554	791360	93.5785	169.003	199.223	146.792	100.129	149.276	152.682	55.8201	139.643	98.455	54.7598	28.4275	50.8566	13.0514	17.3208	12.3763	11.3754	11.9189	16.6197	24.8515
1434348_at	Fez2	225020	102.731	98.3695	140.554	104.281	76.2958	65.3638	83.242	63.0391	59.7916	43.7198	18.4974	42.3168	21.8608	12.908	12.9217	11.5585	12.5271	12.2575	7.85628	12.7229
1434361_at	Snx33	235406	27.6887	9.2564	12.6619	62.2349	57.2758	6.20782	23.5927	70.7661	23.0744	45.7802	5.51696	28.2854	5.42496	5.50771	4.14211	5.3539	5.44421	4.31416	5.5214	3.92866
1434374_at	Fam168a	319604	183.27	123.986	132.114	226.775	253.351	201.242	300.769	184.154	162.403	99.087	76.8024	63.2847	48.2105	19.595	23.2235	9.81523	9.85601	16.1941	10.3422	22.4963
1434375_at	Fam168a	319604	156.235	185.325	137.718	104.316	174.063	346.512	169.015	138.235	136.133	106.114	55.8271	31.6299	23.6473	13.0808	11.4304	12.1609	24.2459	28.6693	9.57469	4.95637
1434384_at	Nrip1	268903	259.538	288.519	451.599	293.721	256.471	251.075	323.759	161.546	182.265	192.648	38.6865	31.5373	15.6132	10.3919	10.1778	57.3305	10.3617	6.85582	15.4878	18.2024
1434418_at	Lass6	241447	172.584	77.9667	143.56	280.734	211.195	100.958	163.479	254.82	199.374	269.085	41.1131	142.667	28.941	22.5099	16.8428	32.7132	32.0049	21.7399	21.5691	26.3438
1434436_at	Morc4	75746	173.147	97.2471	206.686	106.193	103.807	95.6775	174.199	84.1738	89.0734	85.3225	8.07244	11.8269	7.66451	7.52981	7.25675	7.31001	11.7824	7.60939	8.89982	7.49945
1434440_at	Gnai1	14677	189.431	295.474	474.24	259.127	210.644	253.598	331.771	128.517	136.511	211.851	52.0125	22.3339	12.3941	14.5831	4.33825	5.23641	6.80841	8.22563	4.15354	19.7585
1434447_at	Met	17295	258.425	142.752	269.652	504.82	378.777	293.374	485.805	398.675	400.229	524.905	100.71	117.663	81.1519	15.8923	7.15429	6.51958	7.37485	6.96439	7.30008	7.05782
1434458_at	Fst	14313	80.185	45.749	83.1687	196.898	116.767	36.031	90.6539	176.109	124.259	99.0664	57.285	54.3548	33.9356	21.6223	10.5538	7.78218	10.3723	15.7918	10.8449	20.366
1434469_at	Otud4	73945	95.2456	153.886	385.85	558.499	153.786	205.297	411.354	57.861	72.0781	517.929	32.0581	25.08	23.3216	8.98034	6.28474	8.05937	5.4083	11.4786	6.12909	17.5413
1434480_at	4930402E16Rik	319518	554.542	438.08	354.904	701.301	621.915	592.459	732.626	552.973	674.962	252.628	131.673	155.417	173.315	52.3463	41.215	26.9278	27.7062	7.2821	6.44602	7.47645
1434559_at	Stx3	20908	28.2567	13.6861	16.352	56.846	28.4771	9.59434	35.4914	35.7333	84.7355	63.0977	15.0161	49.9325	28.5757	10.0484	9.81827	8.24176	9.92733	9.62167	10.5168	14.3403
1434564_at	E2f3	13557	126.972	171.585	282.708	71.5509	67.7473	97.7785	71.8209	19.6981	64.1513	60.7631	19.8241	18.3729	14.2789	7.19622	7.20267	11.1323	9.05784	6.85199	7.81478	8.46554
1434606_at	Erbb3	13867	81.4221	19.8653	18.151	152.404	114.662	39.6795	98.1019	161.507	103.861	102.321	19.5479	60.8748	48.1626	11.9404	5.69397	71.3672	8.79678	8.7287	18.5394	24.9651
1434628_a_at	Rhpn2	52428	952.603	557.186	904.669	792.438	1224.16	716.921	1191.96	1213.27	1139.05	859.928	327.626	350.203	77.9738	49.2489	43.5254	14.1782	57.2505	15.3442	7.66639	12.006
1434644_at	Tbl1x	21372	92.111	48.9423	25.0823	121.682	84.8435	58.2415	126.733	47.7992	63.3383	51.271	14.2078	11.5285	9.3027	7.47876	7.39667	6.31194	8.99466	6.70729	12.6842	10.9751
1434650_at	Pogz	229584	902.158	740.593	1353.52	1800.24	1541.04	1382.72	2134.25	1045.74	1946.18	1512.6	506.086	444.297	517.001	149.246	106.653	118.933	120.06	117.631	136.407	98.8993
1434659_at	Avl9	78937	277.297	355.276	457.687	220.238	289.964	242.786	265.629	197.524	165.445	151.311	74.3442	54.8442	25.7893	21.2934	7.50125	6.40022	8.2341	5.92653	7.11747	6.22425
1434668_at	Nucks1	98415	58.0402	116.226	149.899	50.3638	92.411	102.653	137.175	26.4385	59.6036	53.5511	19.4219	32.9909	10.2428	25.4488	13.4685	11.9607	9.27872	11.9548	22.5117	34.6642
1434678_at	Mbnl3	171170	128.173	71.2776	157.015	100.347	151.205	121.47	118.639	86.6944	74.1	65.0891	9.21532	24.8539	8.30039	4.94219	4.90938	4.88823	4.88436	4.85874	4.95826	4.87871
1434709_at	Nrcam	319504	199.905	105.503	168.598	39.8379	203.166	174.092	114.06	89.08	85.7086	53.1231	42.4027	13.3291	8.3749	6.01865	7.39134	3.9777	8.65832	4.83266	6.81601	6.53832
1434736_at	Hlf	217082	255.28	141.579	145.4	144.43	233.28	181.367	203.461	208.706	206.477	110.087	37.7274	37.7808	18.7369	10.5771	6.12374	13.1306	10.3428	6.7708	6.13185	19.5825
1434745_at	Ccnd2	12444	504.059	160.629	113.688	1152.23	745.695	178.926	305.707	1003.14	440.846	488.908	165.526	701.341	220.248	62.7201	23.7656	10.9192	35.8923	11.4361	7.67563	6.90372
1434746_at	Mga	29808	878.109	612.685	1138.34	1439.64	1305.42	924.425	1792.02	1381.9	1270.9	1099.04	373.584	514.922	363.821	167.363	163.291	137.415	232.255	181.71	182.89	187.79
1434767_at	C79407	217653	770.929	466.242	614.603	788.584	1504.89	1184.04	1333.61	1732.53	1235.78	1190.43	538.53	713.147	341.375	253.891	153.922	38.1331	53.7616	27.0782	13.1322	9.13539
1434832_at	Foxo3	56484	111.479	137.887	222.764	362.611	129.506	152.054	250.694	131.157	240.597	287.015	54.9416	75.9436	65.0783	11.0077	10.7016	36.5007	27.9083	20.16	17.998	12.7935
1434841_at	Ino80d	227195	84.5729	47.2812	86.2623	84.3935	99.8838	102.247	130.739	86.3165	128.552	107.761	39.8859	46.6909	44.5781	32.5509	19.5866	21.1135	6.92434	6.65903	7.20695	6.93864
1434848_at	---	---	44.3142	15.4076	31.2651	62.9692	64.9663	14.6658	49.7031	60.0373	65.7255	61.5206	8.62475	35.4289	12.6416	8.39765	7.96874	8.56349	7.96508	7.68827	7.72468	7.98514
1434850_at	Iqgap3	404710	18.9248	11.3968	15.5545	54.1006	47.3688	14.1116	47.9444	64.3415	53.8958	59.8834	5.37738	36.2099	11.3304	8.64653	5.22049	5.06006	7.19964	6.31955	6.55946	4.45031
1434875_a_at	Hmgn3	94353	1456.45	1141.12	1671.76	1082.18	1019.97	743.002	699.634	897.901	550.917	611.462	326.006	510.63	252.822	474.284	420.884	245.625	323.645	214.313	273.469	165.684
1434877_at	Nptx1	18164	8.92946	6.7945	7.69812	12.5356	7.30107	6.67434	13.4065	25.9751	46.6145	13.3327	7.48415	6.90335	6.33869	7.3014	6.91178	6.38806	6.73058	6.37826	7.47392	7.11632
1434881_s_at	Kctd12	239217	118.264	70.973	66.5532	231.657	78.5253	15.0819	36.1025	28.354	16.8977	39.2141	12.7996	15.6869	8.68432	12.6807	17.6477	7.40981	18.3461	7.76701	9.07343	6.92977
1434889_at	Plekha7	233765	162.433	160.547	246.444	79.3508	94.1909	185.633	187.942	70.4125	136.728	74.8305	14.8503	31.2454	11.692	9.65341	8.49518	7.9463	8.02478	5.04299	5.26961	8.341
1434891_at	Ptgfrn	19221	58.2189	30.2275	38.3501	135.569	78.326	41.5326	89.5417	90.6665	122.213	126.155	25.5594	68.236	34.8641	9.52123	5.81571	12.7787	10.5197	5.98348	6.12155	11.1834
1434909_at	Rragd	52187	180.166	28.7571	45.5168	369.998	222.865	37.005	154.993	265.305	178.61	275.389	21.3998	229.222	91.3441	72.3305	60.9497	31.6056	13.7839	10.3108	9.8847	11.4935
1434917_at	Cobl	12808	52.9184	50.1481	77.2663	120.795	126.395	115.562	146.27	95.5365	140.915	105.037	9.57428	14.5437	9.6104	12.7508	8.89861	23.0875	9.21796	5.98787	5.43719	7.72818
1434939_at	Foxf1a	15227	85.6546	41.5853	38.112	486.739	123.844	38.9927	57.9308	79.2188	131.437	162.604	42.8885	104.61	107.042	12.454	10.3469	21.9117	14.4708	9.14821	15.4769	16.9196
1434977_at	4933403F05Rik	108654	20.8796	10.8642	24.0317	20.8973	27.6092	11.2588	14.3056	28.672	20.382	27.5015	20.881	10.1604	9.05022	11.2614	9.35352	8.77063	10.416	8.33526	9.28783	8.68005
1434978_at	4933403F05Rik	108654	19.9442	23.0606	40.7125	33.0314	25.3072	28.9637	42.6248	40.4931	38.62	67.1165	7.90702	14.7747	11.4123	9.83646	8.2064	6.53197	8.61294	6.80553	7.54781	7.37407
1434984_at	Plk5	216166	79.6325	132.769	178.071	83.5795	92.8151	195.389	226.068	86.8258	100.972	69.5473	44.5331	18.418	21.4437	16.41	15.3643	14.6211	17.7819	16.1241	15.7616	16.0903
1435008_at	Slc9a6	236794	831.237	547.114	626.026	1512.05	1789.18	1353.83	1854.02	1865.11	1559.36	1702.05	1009.25	690.321	368.561	115.938	42.766	10.3943	47.6444	19.0937	12.5002	6.59096
1435023_at	Itsn2	20403	409.95	329.386	452.271	158.371	401.098	305.735	282.544	232.114	276.196	163.681	55.9853	73.881	65.7213	24.817	26.4256	21.0926	31.2321	23.6069	45.2423	25.1305
1435044_at	Ebf4	228598	116.96	108.715	228.047	62.3803	70.6848	64.4093	64.1611	65.7412	62.7773	28.1993	70.6567	21.552	29.5164	12.0408	14.4703	11.5147	18.0005	28.3132	18.5965	11.8051
1435051_at	Wdr44	72404	415.304	255.477	427.599	145.795	371.787	255.31	290.223	200.442	109.808	106.517	55.9971	33.8111	10.0373	7.61744	8.88803	3.76032	10.8271	4.32936	4.14477	4.12221
1435053_s_at	Plekhh1	211945	90.5821	162.398	413.865	184.779	78.1831	145.337	292.354	74.1802	145.265	181.462	51.3149	49.2429	22.3616	25.7666	39.1977	37.8078	17.0953	22.5136	28.3826	56.8122
1435068_at	Pip4k2b	108083	472.401	173.933	246.332	1029.12	832.012	246.458	493.109	898.888	564.584	716.452	90.5289	587.451	236.358	69.617	35.8238	18.6071	63.494	18.1942	18.9636	18.3566
1435110_at	Unc5b	107449	59.6542	52.8215	68.3005	50.4587	92.4875	110.976	96.2498	52.7931	93.4896	92.4303	19.1852	16.3841	16.1419	14.628	10.2783	14.5071	13.1814	11.3556	14.9084	14.4794
1435163_at	9030612M13Rik	208292	195.729	138.436	128.191	86.8095	163.721	223.407	131.443	156.063	58.2779	68.5382	18.9462	12.8894	5.53243	5.90677	5.15123	6.37561	5.20599	6.69312	6.07849	9.00291
1435168_at	Zfp710	209225	363.805	145.013	150.069	520.498	529.256	165.855	323.683	544.423	371.056	447.478	130.622	303.379	133.489	43.3543	42.6178	41.7048	43.0147	31.8842	43.5054	47.5271
1435170_at	Tsr2	69499	38.6538	8.75784	61.3898	30.5199	35.7611	23.0046	30.9138	26.0684	26.5138	21.286	7.49023	6.48137	6.42788	6.26537	7.09613	6.02062	6.32583	6.64482	6.70075	7.13134
1435172_at	Eomes	13813	13.7095	10.8724	12.7351	10.2817	14.3559	9.99283	11.6845	33.1579	37.2329	10.1216	10.5893	11.1156	10.3426	10.4981	10.4418	9.89357	10.4964	10.234	10.5436	10.5161
1435176_a_at	Id2	15902	288.027	283.22	183.363	974.631	175.485	109.859	199.758	153.326	111.268	135.354	50.1056	81.4061	60.6335	27.616	41.7415	23.0634	83.0949	42.2754	43.3444	41.4474
1435183_at	Tbkbp1	73174	131.944	69.4519	155.444	147.138	131.484	70.3516	236.134	176.757	135.53	166.637	44.867	45.7586	45.1161	50.9389	27.1827	14.3925	45.3201	11.4406	32.4542	47.4801
1435189_at	Frmpd1	666060	30.5304	15.5693	16.979	71.291	70.2979	32.7745	50.1347	53.9974	48.9653	44.6577	17.4929	26.66	15.682	10.9499	12.082	10.0631	10.3977	10.3593	4.03623	10.396
1435192_at	Sox3	20675	1163.49	722.476	941.848	2424.89	2016.26	998.88	2409.78	2190.4	2021.71	2179.08	742.299	1021.74	923.435	170.027	57.2172	21.8212	37.0237	4.89172	37.6855	23.2759
1435213_at	Nhlrc1	105193	49.9973	12.1249	29.6295	72.9209	36.4382	10.0321	18.9197	29.7043	22.5156	11.7949	9.44528	35.5229	9.47273	11.03	10.9588	8.83077	12.0924	6.113	11.6958	11.082
1435284_at	Rtn4	68585	382.61	306.462	174.257	262.154	474.413	997.738	512.567	392.461	304.52	349.103	177.63	165.268	139.252	54.2923	36.6651	32.5699	24.1586	49.0117	28.3254	29.2666
1435285_at	Mpped2	77015	61.3438	28.866	84.4661	64.7172	88.6599	31.1637	71.7197	73.8491	109.601	86.2813	15.2708	39.0203	15.0524	20.1776	13.7561	11.2583	9.30103	8.45348	10.3044	9.91738
1435290_x_at	H2-Aa	14960	2935.6	871.886	150.477	2248.27	1676.66	36.8177	16.5544	127.92	6.54801	13.7035	7.37959	24.8595	7.09197	8.27628	6.47663	6.30061	19.0878	6.43442	5.93876	5.17489
1435307_at	Ankrd34b	218440	29.4317	18.8286	20.403	87.4169	69.222	19.3256	34.8873	57.9304	75.682	60.4565	19.9107	19.3004	19.6214	19.1002	15.4203	12.5098	17.6537	14.2836	16.0384	17.6716
1435337_at	Tshz3	243931	47.302	21.4947	38.294	17.0831	55.0933	23.8029	17.2421	11.9507	18.8866	8.58649	10.6954	8.46181	6.41732	8.14829	5.83558	6.78656	8.95644	8.48429	8.57434	8.63499
1435339_at	Kctd15	233107	319.481	247.117	249.795	484.47	568.758	429.796	436.198	596.001	508.254	484.181	229.056	181.853	89.1009	24.077	8.66396	8.2693	11.6221	8.57335	7.17451	8.53387
1435355_at	Neb	17996	8.08421	8.0815	8.09363	16.5443	8.34514	7.75031	9.86943	19.5737	42.1389	14.2044	8.41184	21.7094	8.19263	8.36497	7.58665	7.72296	7.7044	7.3264	8.33944	8.2338
1435382_at	Ndn	17984	706.349	516.238	485.444	1117.24	670.915	269.392	496.441	810.463	496.803	585.068	147.522	247.435	163.656	48.0107	16.7614	9.96806	41.4807	19.4111	14.6871	22.4268
1435389_at	Reps2	194590	188.272	153.541	318.088	129.218	246.25	126.297	170.582	151.825	103.74	119.704	30.865	35.1992	9.34944	9.23247	9.43995	7.70331	24.752	10.0172	15.444	9.44952
1435436_at	Epas1	13819	222.875	213.781	138.866	1158.95	317.009	310.696	722.035	616.467	292.752	737.449	73.9584	461.39	124.161	45.8586	182.67	38.592	256.817	41.9457	45.971	54.1297
1435450_at	Cpne3	70568	330.896	266.662	383.892	166.325	272.617	327.598	228.583	248.74	135.378	182.39	60.9333	84.1058	25.3922	11.1815	20.3657	10.1315	24.9436	10.4339	10.7259	10.4723
1435455_at	Iffo2	212632	67.127	42.2093	57.6443	125.273	108.44	75.5087	105.676	116.42	133.552	112.507	35.8191	39.6215	6.89912	7.00902	6.94455	6.6832	7.73208	6.88928	7.05652	6.90662
1435491_at	9830167H18Rik	620419	11.513	15.8215	41.2884	51.3399	21.8445	29.2825	23.7588	11.6926	27.2135	29.2857	8.0189	6.89986	6.57767	7.29408	6.26623	6.34996	6.60551	6.59009	6.3226	7.35041
1435492_at	Socs6	54607	61.3042	31.2556	74.4513	35.1594	55.9948	14.3567	68.0098	27.5316	31.8763	37.109	13.4356	10.6589	11.4839	11.6896	8.76001	8.70295	8.81361	8.12003	8.7201	8.75258
1435497_at	5730590G19Rik /// LOC100047683	100047683 /// 77011	290.548	223.491	680.83	259.125	275.372	346.791	441.349	134.467	342.541	239.897	27.0589	89.5256	72.1278	84.2988	61.9376	27.3592	26.0082	25.0178	21.9321	15.1873
1435500_at	Rab26	328778	54.254	70.719	94.6745	18.0269	23.1663	50.2464	41.2894	15.0996	22.9729	25.6515	13.4913	11.6127	11.4138	11.8391	12.8471	8.62377	11.6473	11.7326	12.2157	11.8103
1435566_s_at	Araf	11836	13.7932	18.6919	59.176	41.4115	13.7429	15.2502	57.3057	28.5389	52.8721	36.4877	10.0675	13.6155	10.2515	11.7841	13.678	8.33488	9.8161	9.24745	10.0415	9.66741
1435597_at	Atad5	237877	445.469	415.162	770.669	378.392	395.821	490.569	441.893	236.407	280.825	310.062	113.74	76.6116	35.9605	8.01805	7.59062	5.51689	8.69284	5.57408	6.00984	5.82471
1435634_at	Pcmtd1	319263	123	118.766	114.038	114.368	96.7962	123.936	101.954	77.4749	60.9425	51.4578	12.917	30.8264	11.1623	10.7273	10.6378	10.3826	10.6077	4.89886	5.30753	11.8988
1435635_at	Pcmtd1	319263	138.186	154.673	98.4432	69.9486	94.9621	144.775	88.3333	84.6549	51.5395	49.0539	12.1382	38.0238	23.6221	15.283	15.0519	11.4201	14.9938	16.4222	13.6674	15.9059
1435655_at	Rpl12	269261	58.1763	42.4452	92.9992	10.5485	45.1376	46.5219	10.7167	33.3305	28.9444	11.0478	6.17005	10.6201	17.0933	4.77391	5.54995	5.11088	4.69289	4.70678	4.73514	4.68186
1435667_at	Rims1	116837	181.199	66.5797	126.412	197.624	255.912	102.648	256.299	332.656	243.215	237.019	42.4008	106.577	41.5591	28.812	25.2016	11.8641	27.2374	18.7326	19.6968	13.4959
1435669_at	Zfp532	328977	192.4	115.828	199.251	402.978	330.225	221.124	337.265	274.181	382.961	378.283	112.859	120.321	91.0366	22.4739	13.0774	34.3192	15.6324	10.7321	8.93331	12.8472
1435680_a_at	Dpp7	83768	74.3985	89.296	155.397	127.568	34.8587	115.289	91.4033	60.3489	92.3194	53.5282	29.4098	33.9382	30.3289	20.5734	20.1811	16.9052	17.36	16.617	17.6671	17.165
1435697_a_at	Cytip	227929	108.338	126.273	167.25	309.696	61.2944	40.3021	32.7243	67.5794	35.4275	24.9824	17.2423	37.7488	5.37958	4.35962	32.8129	4.88036	69.7339	4.79639	5.33961	19.2611
1435720_at	Kcnd3	56543	90.3922	56.7839	143.585	128.189	144.217	151.128	182.325	120.516	182.802	177.097	29.9915	39.6302	12.4446	15.895	26.8293	9.64927	9.46101	9.17995	8.98706	8.28137
1435727_s_at	Lima1	65970	38.98	18.7871	21.0805	115.767	57.2083	35.5453	40.5986	107.068	60.3143	70.1202	17.5008	62.5756	31.205	16.7081	22.7683	10.4775	19.9249	9.91804	13.7263	13.8157
1435728_at	Tyw3	209584	58.8758	25.1422	19.1591	40.0987	81.3664	19.4347	44.0133	62.8954	47.9904	51.4371	15.1551	28.3327	13.2384	17.9836	16.821	12.7061	13.5024	13.3142	14.0058	12.5947
1435740_at	ENSMUSG00000072684	100038401	230.4	135.212	242.867	504.094	319.921	123.659	526.626	395.977	455.436	449.655	48.3243	132.821	145.761	7.68919	10.2291	30.3694	7.35162	9.29524	13.1242	14.6299
1435744_at	6720401G13Rik	103012	27.3445	42.8599	144.68	79.1079	89.4039	65.3659	52.9109	71.3987	109.695	76.7396	10.4453	27.1609	13.375	10.3456	10.3491	9.77365	10.748	10.1172	10.459	10.1594
1435758_at	---	---	37.8539	13.215	15.1746	43.8498	49.9204	18.3138	16.3544	54.4773	70.3756	34.3129	13.4938	24.0424	20.4581	18.3024	14.7788	19.0295	25.2453	10.0728	13.512	13.2858
1435769_at	Akap9	100986	780.395	692.721	1188.13	1040.94	962.943	1135.65	1358.02	1018.39	1388.41	1353.76	305.2	375.622	301.295	127.253	87.3312	66.4704	107.348	29.496	22.7814	56.3164
1435787_at	Ppm1l	242083	22.6679	15.2918	42.7073	38.2748	40.73	44.9525	45.2887	27.2291	54.4926	38.6656	9.89689	15.0187	15.0757	11.5174	9.34072	12.1645	11.3518	7.63877	11.1814	15.5866
1435795_at	Glb1	12091	21.7568	13.4775	19.2898	66.2763	33.9286	15.8598	24.53	27.5118	43.7374	42.0522	9.08262	12.7745	13.4428	7.56843	6.4129	8.32766	6.47571	7.18256	7.77411	7.59064
1435826_at	Rad18	58186	66.3548	43.3302	72.5343	70.8836	74.57	67.0618	88.8598	104.152	93.0128	90.0572	43.9946	41.6331	34.7514	26.8048	12.3268	12.0221	5.89676	5.24632	5.26848	5.26616
1435829_at	Zmat1	215693	401.598	284.383	502.667	214.084	340.741	300.25	313.474	222.951	160.158	127.312	49.4289	48.9054	31.8864	11.8478	22.9627	5.83069	35.1311	16.327	3.73725	3.58145
1435860_at	Slc5a6	330064	132.656	101.263	187.341	217.696	221.861	217.907	240.986	194.53	252.869	210.286	92.9407	58.0559	51.4767	10.6864	13.5678	6.98319	6.37951	6.36156	13.3598	6.24247
1435861_at	Ppfia1	233977	47.7063	82.343	61.701	63.6521	61.2274	141.403	90.4126	50.5287	36.5034	64.8419	30.4443	17.9848	27.5508	13.8023	21.6773	28.0974	8.13352	21.0511	26.127	9.71292
1435871_at	Elavl3	15571	26.8034	16.5907	41.0265	17.5625	31.0442	56.048	29.444	46.3041	95.8859	25.7344	23.2184	7.66577	7.68954	8.22761	7.50333	4.27705	7.68002	7.38875	7.53947	7.73573
1435890_at	Atl3	109168	129.469	95.783	180.402	78.9787	97.2726	69.1658	69.3741	53.0869	64.4806	37.2701	8.7392	25.3377	15.8851	6.38263	6.18785	5.15172	6.03317	4.96718	5.09976	4.98318
1435906_x_at	Gbp2	14469	35.559	17.0702	14.2757	91.8306	48.6964	17.7004	20.3351	54.2282	30.0348	45.8378	19.555	83.8089	15.9653	11.8034	11.7265	9.53966	14.872	7.81702	17.0588	5.8824
1435909_at	C030034I22Rik	77533	19.6728	12.7183	18.9187	41.6467	19.1444	11.1273	41.6017	39.9363	31.8947	19.5533	6.79052	17.1769	12.6365	10.6875	6.71883	12.2449	6.62451	8.77336	12.4345	8.73491
1435926_at	Chml	12663	479.031	297.713	621.175	746.914	571.162	465.305	663.323	642.97	868.053	788.151	186.489	332.442	259.735	266.149	191.731	101.687	44.6647	47.6819	61.2557	29.7124
1435931_at	---	---	84.232	142.772	262.147	155.519	135.481	420.249	172.61	107.907	189.047	139.819	73.887	35.262	19.8171	5.08587	5.14184	5.7499	5.46992	5.85628	5.13078	9.21141
1435971_at	Rims3	242662	84.267	177.438	202.059	136.015	65.9451	192.77	103.236	71.9217	105.348	49.5324	94.4925	41.9806	38.3701	43.7819	37.0179	30.9381	33.6309	30.8174	32.7953	40.8446
1436001_at	2310028O11Rik	433771	140.505	95.3097	207.06	120.039	58.1205	90.1472	72.4253	66.48	128.805	83.6489	18.5006	32.3849	22.3854	15.1796	18.6404	23.2014	14.9136	11.9586	14.2594	17.2594
1436002_at	Scube3	268935	47.3139	45.1727	75.9668	94.5464	83.8184	80.4335	97.8449	69.4985	118.02	57.2562	22.7696	23.4117	19.7586	10.9322	10.8181	10.1322	12.3596	10.5621	10.6875	10.1867
1436004_at	Usp27x	54651	126.117	79.8893	100.578	124.519	202.595	96.0688	183.474	174.657	184.396	146.811	23.4078	55.5653	18.2698	10.6073	12.8841	10.0963	13.7901	7.19846	5.82515	5.82343
1436010_at	Lrrc16b	268747	129.377	106.016	187.071	59.6141	174.215	201.14	156.425	93.5611	86.4634	87.6608	68.0302	30.5421	17.739	11.0767	16.8203	26.2619	31.2503	8.22664	50.6621	8.45845
1436058_at	Rsad2	58185	42.2659	26.4078	40.8318	128.05	73.0844	41.136	110.968	120.265	97.9079	140.601	42.5534	53.5611	41.7374	31.1673	26.2766	40.5877	26.2819	22.9418	42.5534	25.9452
1436074_at	Nfkbid	243910	104.559	18.9116	74.4235	154.313	110.011	42.182	103.853	112.514	68.9254	85.803	21.0697	42.1066	20.7006	12.8671	11.9069	7.19218	11.9203	11.6315	8.96117	12.084
1436136_at	Noc2l	57741	57.2763	59.5961	117.685	47.0478	106.943	188.308	95.1495	62.1464	118.857	37.8837	16.116	18.7225	18.5718	10.6354	5.34829	10.8876	7.28915	11.2387	8.63174	13.8862
1436145_at	---	---	110.65	56.9236	112.364	57.3288	155.269	109.348	99.6176	105.424	119.087	39.3498	35.3824	35.5428	38.2526	14.4529	13.3119	15.6858	6.826	6.85866	5.28073	8.74377
1436173_at	Dlc1	50768	94.2652	46.5644	56.0481	167.2	155.967	91.0583	151.859	118.132	125.605	122.801	26.4564	54.4594	20.0745	21.8613	18.2633	14.335	21.5023	18.2264	22.1311	21.4401
1436181_at	Ddef2	211914	54.2883	29.9921	157.807	90.598	73.2952	110.699	136.074	51.4023	113.609	81.6346	14.136	14.696	13.6868	7.81868	7.54226	7.32408	7.74356	7.48858	9.02867	7.97711
1436183_at	Zc3hav1	78781	537.472	404.341	533.758	240.687	468.771	429.743	324.586	218.698	176.48	103.856	76.8409	74.0734	14.6628	20.5625	24.0722	10.0958	51.4571	14.724	14.5559	12.3347
1436188_a_at	Ndrg4	234593	2418.93	1747.89	2060.1	4792.02	3368.61	2418.3	3603.9	3579.57	4732.33	4150.46	1193.21	1688.08	1026.49	239.497	107.715	39.8391	119.126	45.1572	34.2486	13.2196
1436193_at	Man1c1	230815	163.692	107.837	211.981	273.63	195.136	138.391	236.592	158.79	217.592	173.279	38.7301	52.3401	28.4618	23.7812	5.93204	15.3613	4.13071	3.97944	4.17149	5.11515
1436195_at	BC046404	192976	37.6067	12.3993	12.2026	85.8614	62.2548	35.038	26.9248	66.0638	34.8679	35.7581	22.5145	31.9306	8.77573	7.25219	7.12548	6.59751	9.47388	7.8745	7.45048	7.19967
1436196_at	C030046G05	327885	156.581	152.521	245.441	96.7813	132.987	144.411	142.107	64.6511	75.9394	94.5481	9.08011	13.1657	10.504	6.61918	7.39269	6.96541	7.36874	7.7839	12.3448	7.61425
1436200_at	Lonrf3	74365	1626.67	942.694	1782.2	3019.2	2654.24	1979.79	3613.63	2612.21	2709.87	3449.37	895.307	1012.31	514.727	129.227	223.63	42.4419	237.857	38.4577	13.3163	7.12521
1436202_at	Malat1	72289	100.464	114.27	304.977	59.7883	84.3427	274.446	146.411	43.0357	66.531	44.168	31.5692	24.5258	26.0825	12.4957	12.203	24.395	54.912	71.2064	56.7435	26.1484
1436222_at	Gas5	14455	41.735	61.723	100.643	138.896	47.0273	172.817	245.871	44.941	143.35	168.18	24.3428	26.454	87.9212	45.077	41.2649	189.324	6.21323	14.2846	35.0114	17.2305
1436244_a_at	Tle2	21886	68.5396	115.334	123.738	28.1637	96.5175	134.129	61.4686	14.6393	39.9072	27.9442	14.3057	12.0275	12.1611	6.14886	7.89787	5.75911	11.3177	12.9407	9.50869	6.19708
1436250_at	5430405G05Rik	108832	48.7711	20.423	30.8904	73.5902	83.1493	27.3643	57.1954	134.057	60.4273	72.975	31.9509	46.22	36.6687	9.8187	5.56161	10.4828	11.7456	20.881	17.4759	8.38703
1436308_at	Zfp292	30046	133.83	94.9564	192.023	176.441	184.896	219.862	263.381	196.178	233.086	217.406	41.1151	46.8946	74.907	16.5481	10.6691	11.9105	15.2408	10.4048	10.806	10.4056
1436335_at	Plch2	269615	13.8141	11.191	7.63298	17.685	104.778	25.8549	47.3887	31.8615	32.9117	31.7508	23.1174	8.90518	6.57889	8.20469	9.13175	6.29004	7.23989	8.03499	6.65986	6.50224
1436354_at	Dzip1l	72507	35.9675	55.3655	93.6811	61.6012	75.7746	91.7098	133.563	49.7325	67.7431	67.9366	35.9706	21.3559	19.8847	12.9625	13.6758	21.3626	13.809	15.3099	22.4487	16.4287
1436359_at	Ret	19713	134.756	36.5403	74.9036	301.867	157.981	39.9862	94.0262	147.139	190.22	205.441	28.9584	118.938	48.0477	24.2008	22.4427	20.5958	24.1506	17.8841	29.4601	20.5379
1436368_at	Slc16a10	72472	520.183	545.267	638.611	186.77	436.148	701.144	365.365	216.371	244.197	111.983	137.661	47.0765	68.6533	17.4402	21.784	20.3579	37.348	18.6242	8.86819	7.69358
1436382_at	Zbtb12	193736	109.101	93.5343	33.7536	97.9682	164.192	105.337	161.042	89.0522	44.6615	56.0258	8.13256	6.54176	5.43628	5.22181	5.17549	4.99262	5.44106	5.1325	5.74837	6.13027
1436387_at	C330006P03Rik	320588	121.46	42.6034	96.3256	164.656	175.688	39.2582	135.055	211.206	145.274	188.124	33.1749	78.8289	25.8929	17.5038	18.5561	12.591	20.9213	20.2066	14.0828	21.0951
1436389_at	---	---	142.046	114.327	285.238	114.811	72.4545	89.971	144.689	74.1119	152.865	74.7925	25.6655	24.1889	25.5526	20.0021	17.5539	18.4024	17.9588	17.108	18.7031	10.669
1436400_at	Fxr1	14359	35.9447	18.0262	30.5574	30.0258	46.011	12.6232	34.2556	50.3928	33.355	35.4543	11.0713	12.9974	10.6442	13.8362	11.8627	9.71714	10.5119	10.222	11.0275	13.9499
1436434_at	E2f2	242705	254.272	378.001	586.07	112.98	90.4935	176.6	147.497	18.0912	19.379	21.9224	18.4864	8.18508	7.09537	11.0047	7.6619	7.6675	11.2971	7.14008	7.39122	8.37006
1436442_at	Ptpn14	19250	42.6427	27.5823	31.7732	39.259	63.3239	39.3978	72.9135	51.6949	87.5629	56.9632	30.0061	23.0951	26.2888	15.5092	7.50492	11.2922	25.7247	27.9395	26.7609	25.6075
1436446_at	2310007O11Rik	74177	691.561	570.656	787.159	280.731	574.955	705.83	479.973	329.091	369.527	193.574	197.232	186.085	189.062	243.308	118.035	40.3507	28.056	12.4281	15.2019	12.8927
1436459_at	---	---	50.2747	23.1683	63.3761	63.2141	47.6326	30.4534	69.8978	57.2464	70.4643	38.1843	7.39702	11.2256	7.86534	5.2075	4.20831	5.6962	4.19455	4.1549	5.32083	4.28324
1436503_at	BC048546	232400	34.9347	14.1386	18.3623	36.8623	47.9663	19.3646	32.1503	68.2647	34.0342	54.5415	21.7494	36.9234	21.1885	21.5347	15.6142	13.7414	16.3099	11.6033	11.8266	21.1188
1436513_at	Tanc2	77097	728.659	368.681	349.863	866.875	1340.49	1090.87	1194.11	1067.44	1266.26	798.136	208.341	435.361	338.207	153.77	86.9049	26.2477	148.46	127.476	89.5553	54.0474
1436533_at	Trove2	20822	29.2859	41.148	20.6805	33.0714	9.92858	41.4421	48.3383	9.71673	8.44287	12.0554	13.9482	8.30067	8.61434	8.8059	8.49682	8.07097	8.54733	8.38463	8.87163	9.44173
1436534_at	Trove2	20822	137.098	106.363	241.079	66.1122	88.5742	99.9177	108.484	47.7473	44.073	41.5469	28.551	18.2403	17.737	16.1161	17.3	15.3597	17.978	15.8164	16.2559	23.4289
1436535_at	Trove2	20822	88.7634	77.5861	56.1653	36.7623	46.203	50.0897	71.3983	16.7288	25.1999	17.4328	8.5413	9.05911	8.84925	5.14587	4.83022	5.1684	5.45579	7.87062	4.86508	12.4651
1436573_at	Scrn3	74616	45.65	22.7322	94.7808	32.1097	46.4389	45.4185	44.3284	34.4305	37.0535	22.1998	6.45757	7.58239	6.31834	6.34023	5.60522	5.88023	6.22674	5.89181	7.64881	7.82071
1436583_at	Dscc1	72107	35.6458	60.006	56.42	27.6392	26.4546	62.8393	31.7166	11.6471	25.1175	10.9715	11.1808	9.52774	9.60702	10.2776	9.88859	9.11337	11.6161	5.5942	10.7161	11.2519
1436584_at	Spry2	24064	137.846	100.089	113.554	222.691	113.038	68.3696	95.9544	105.418	55.5335	71.2181	16.494	47.6852	19.4814	18.2027	14.6395	20.0001	16.0611	13.9806	13.2534	11.9262
1436602_x_at	Cacna1b	12287	23.1749	23.7767	24.4806	39.2602	29.6862	50.7176	82.4862	34.5562	128.271	52.3528	29.3152	36.2011	22.1232	10.0994	9.9549	9.45063	9.92068	11.3901	10.7695	13.6825
1436666_at	---	---	21.281	55.4785	81.5691	15.3056	60.2312	155.541	61.462	44.4526	68.8215	47.4767	15.586	12.6316	18.2468	8.53628	8.15362	23.608	8.15317	7.96995	8.56691	9.09333
1436708_x_at	Mcm4	17217	3673.57	2410.61	3474.69	1561.41	3340.73	1370.85	2178.29	2329.75	1475.74	1773.77	620.198	475.01	167.946	132.987	49.9588	12.6985	70.2129	12.3118	10.6287	6.23199
1436714_at	Lpp	210126	40.7505	55.9639	56.0076	126.641	70.8117	98.9509	75.1237	88.8693	168.09	84.8472	8.33737	48.8953	24.0889	8.19183	9.60697	35.5467	18.4667	43.0707	28.994	20.9699
1436759_x_at	Cnn3 /// LOC100047856	100047856 /// 71994	333.27	98.8682	99.3351	298.792	357.133	69.1548	156.518	444.699	224.809	326.594	34.4548	194.018	38.1844	33.2114	16.0987	7.97445	22.1315	7.62641	7.49184	7.95176
1436775_a_at	Ankrd17	81702	4084	2973.34	1995.57	7574.44	5023.67	4479.61	6976.19	3947.65	5738.47	5233	1142.03	1902.44	1656.72	1234.36	867.305	606.99	483.855	539.87	445.047	774.735
1436789_at	Ccnjl	380694	42.033	10.5798	11.9289	79.0361	116.662	14.1384	15.346	121.926	57.1052	23.7754	15.7535	148.377	26.6335	25.8868	15.1253	5.73486	21.5997	10.4234	10.8557	9.58712
1436790_a_at	Sox11	20666	244.268	247.36	365.3	244.423	396.95	305.606	468.217	224	392.017	348.581	45.9096	26.2454	32.7783	5.89632	4.69039	16.6537	11.5459	5.88304	6.1728	17.7435
1436796_at	Matr3	17184	563.474	377.227	492.764	1108.03	491.684	449.245	707.315	615.061	923.814	907.133	222.758	297.69	265.892	55.3341	17.327	76.731	17.0969	10.1569	17.6071	18.4238
1436845_at	Axin2	12006	150.521	65.8072	123.151	266.278	236.968	159.976	257.747	231.133	326.518	226.744	93.3857	116.632	84.1857	43.5463	25.5602	18.974	42.7078	26.4006	44.6946	13.8392
1436849_x_at	Gaa	14387	2156.76	1494.41	1578.28	866.567	2048.28	2083.15	1199.32	1115.2	1043.58	562.864	550.922	422.015	197.152	140.534	122.203	60.0886	126.719	86.3951	79.6026	49.1503
1436860_at	Senp7	66315	291.321	301.724	264.127	147.879	125.007	228.008	188.858	86.0454	72.9888	80.7571	57.0104	63.3076	52.5037	65.4749	75.5436	74.1996	86.4179	101.51	87.4992	79.8015
1436883_at	Mbtps2	270669	294.273	165.937	362.417	96.9438	280.467	218.382	231.365	147.492	143.288	95.961	46.3983	41.2252	11.1486	8.03043	8.8434	7.08421	18.094	14.8317	19.036	10.9178
1436892_at	Spred2	114716	138.512	86.8783	51.6357	78.9221	143.504	121.822	144.046	62.3961	34.7106	52.2968	31.2638	13.3313	8.28468	8.45463	8.2507	7.7877	8.22752	8.13911	9.30326	11.3656
1436895_at	Arap2	212285	43.5519	45.8328	6.43111	39.3675	54.665	36.5952	52.5006	40.0189	15.8601	22.5354	19.4656	11.9757	13.3562	6.37022	6.50138	5.99568	12.0627	13.4212	6.45126	14.673
1436898_at	Sfpq	71514	1742.04	1629.56	998.143	1337.88	2227.3	3402.18	2295.15	1674.74	1284.38	773.487	1133.28	544.09	881.054	642.317	441.77	574.764	273.095	346.497	183.131	288.189
1436907_at	Nav1	215690	30.0285	9.78862	18.7703	110.95	83.0493	33.4192	50.0741	71.1123	89.7705	83.1777	15.078	19.8839	5.27696	4.85731	4.60468	4.61519	4.78158	4.87366	4.88846	4.82721
1436917_s_at	Gpsm1	67839	485.502	274.605	410.106	204.971	526.556	257.113	353.727	382.596	329.684	297.242	97.6431	75.4936	37.2739	34.6501	17.782	7.44275	40.8217	8.51678	7.08764	6.87322
1436922_at	Ppil5	69706	103.431	102.482	142.557	77.9689	67.207	34.1007	90.4494	68.1279	35.4347	52.7136	30.4672	23.4822	19.1911	30.804	11.2458	8.59743	7.63822	6.90606	5.80768	7.66055
1436925_at	Foxn3	71375	717.621	416.4	533.102	841.787	1015.16	545.84	800.873	808.344	741.694	741.251	146.985	214.434	126.051	40.7877	36.0536	10.1915	64.874	18.8846	24.8341	36.4699
1436932_at	Grhl3	230824	15.7826	16.4067	23.0897	14.9682	30.1975	12.9853	42.1062	22.0963	44.0314	33.2963	8.17867	4.35309	2.93017	3.06327	3.02213	3.91032	3.02424	2.95294	3.06508	3.03369
1436933_at	---	---	37.3141	22.4629	43.3235	17.8788	81.161	167.313	19.513	25.71	55.2512	19.1042	20.0615	19.1572	19.4329	11.2449	13.3043	16.1922	14.0738	12.824	20.1856	21.1409
1436978_at	Wnt9a	216795	72.8286	64.6088	101.486	29.0408	78.8297	98.407	64.8081	51.6049	79.7668	38.4595	28.4445	14.096	11.7732	13.4625	7.73384	11.5851	11.2308	9.00152	9.09516	7.97512
1436983_at	Crebbp	12914	2278.49	915.189	900.44	5202.77	3218.08	1467.55	5193.59	2234.75	3327.51	2466.28	425.582	810.781	826.645	349.428	265.204	227.602	259.644	248.17	210.33	536.847
1436997_x_at	Sh3bgrl	56726	116.434	21.5658	30.217	103.761	70.2254	9.52707	20.2873	58.4981	16.7349	23.8877	8.10769	31.7572	7.15385	5.52021	15.6112	3.99506	28.0877	8.31906	8.06556	8.81033
1437017_at	AI480653 /// LOC100047112	100047112 /// 268880	29.3182	26.8085	57.2303	55.7757	48.403	43.8529	62.8369	27.5394	61.4157	54.7225	9.27021	8.08505	9.04255	9.25591	7.81046	7.62936	7.76279	7.76659	7.9541	9.11004
1437101_at	Lats2	50523	287.062	272.944	494.191	1391.01	413.038	430.746	1199.77	515.949	914.718	1194.04	181.157	171.236	229.869	39.9837	40.9049	63.5415	85.2398	99.1385	111.793	115.498
1437103_at	Igf2bp2	319765	34.5538	12.231	11.1095	68.7735	38.7366	15.1078	20.9589	54.8241	34.9066	48.3763	18.3608	24.5738	22.4652	13.2173	12.9128	11.31	7.72237	15.4584	8.46869	16.385
1437106_at	Kdm5a	214899	758.214	462.585	327.475	552.827	950.542	521.335	878.369	848.51	768.066	186.25	221.373	305.868	196.101	229.063	138.553	91.732	175.807	116.438	102.527	98.7755
1437110_at	2810474O19Rik	67246	515.897	313.449	212.197	604.092	570.158	447.582	695.503	702.518	662.904	288.643	197.478	252.351	183.234	74.9466	52.6871	25.2424	24.0951	33.294	15.6419	17.9891
1437119_at	Ern1	78943	120.014	86.5518	151.076	64.5955	101.856	115.338	119.477	70.1777	110.987	42.3761	16.4282	32.8567	22.4866	6.44169	12.6587	5.79988	15.2769	6.47354	12.678	9.81084
1437166_at	Tinf2	28113	45.2938	83.2476	143.505	112.527	20.3989	123.232	121.4	19.5411	95.7993	58.7954	10.1706	17.7146	18.1379	4.75147	12.0895	6.98201	9.96656	10.2981	5.82552	10.3714
1437175_at	Pdik1l	230809	768.737	588.981	897.305	420.493	555.725	690.59	562.55	344.339	283.72	278.621	167.282	209.869	143.229	198.685	186.754	103.574	54.836	14.389	11.5534	11.4782
1437199_at	---	---	236.205	419.699	279.478	487.152	137.421	362.168	420.019	101.416	133.385	181.32	70.6284	62.4992	52.9506	37.4206	43.5482	40.9215	49.4337	43.0976	47.6771	58.9729
1437202_at	Mysm1	320713	213.207	155.16	424.921	299.404	303.261	334.733	533.896	251.446	402.497	462.902	54.4095	77.7286	101.539	66.2329	41.7807	21.4675	9.56816	4.5645	4.78437	8.39489
1437205_at	Tcf25	66855	155.384	183.491	136.25	313.674	286.761	345.032	402.191	201.866	206.688	211.271	88.179	94.523	86.329	87.5381	87.289	66.1603	85.6878	31.3515	73.9532	44.5212
1437217_at	Ankrd6	140577	43.716	26.361	26.9566	110.172	81.8626	28.2641	63.1419	84.0849	81.4044	80.0775	14.7905	53.2871	34.3609	14.6527	12.1965	18.099	9.87285	3.50794	13.9709	11.8031
1437218_at	Fn1	14268	65.4766	102.47	212.61	96.4355	54.9579	121.01	82.3681	36.0458	94.2777	26.9683	19.1503	12.5676	12.5882	13.2777	13.0488	11.8093	14.0776	12.7654	14.7092	18.0078
1437219_at	---	---	126.681	91.5158	65.2746	58.6572	240.984	427.615	105.312	201.236	207.488	87.9298	25.2564	110.577	48.5571	21.599	13.1755	20.8224	8.34974	6.90951	13.4068	17.8463
1437247_at	Fosl2 /// LOC634417	14284 /// 634417	82.345	143.321	216.094	494.879	72.0037	169.313	267.05	91.9137	134.14	158.253	21.8338	45.569	25.6655	8.70692	17.7314	11.0531	17.8071	8.33181	20.0309	20.2371
1437252_at	Gatsl2	80909	387	224.834	505.54	227.482	246.273	227.242	304.825	200.284	149.068	157.08	65.8647	23.96	22.1699	10.5919	22.4763	21.3573	25.1605	22.1994	21.9362	35.5019
1437277_x_at	Tgm2	21817	20.21	44.6142	8.08867	206.918	19.5269	36.5646	184.929	110.407	9.74078	86.3902	7.42472	34.0309	7.69503	5.06579	12.5176	7.01598	57.2353	8.90092	7.34331	9.41253
1437291_at	2700081O15Rik	108899	134.988	88.9625	187.075	250.151	164.31	162.445	286.668	157.698	308.63	165.546	75.9244	57.2625	41.057	14.4188	12.0588	9.73768	16.8657	16.1883	17.3314	12.0619
1437303_at	Il6st	16195	78.0816	17.7846	12.1438	55.4986	82.424	27.1754	25.4721	56.4078	37.3884	25.1716	9.56864	11.9194	7.89398	6.62926	6.63172	6.94006	8.09922	6.87584	6.99905	9.0649
1437311_at	Snhg11	319317	53.609	62.5881	76.3015	161.794	45.1417	92.9725	219.953	52.3769	158.392	121.14	28.7277	43.5272	39.1095	29.1799	28.9491	26.0766	26.8238	11.8076	24.5374	28.9961
1437322_at	Rbm4	19653	108.03	105.608	24.9026	54.2018	170.672	271.083	114.976	112.213	127.339	49.2486	99.8245	41.7724	100.272	56.0407	34.3891	61.8801	25.0129	40.9683	20.7608	24.278
1437325_x_at	Aldh18a1	56454	418.844	146.835	245.504	352.236	461.695	106.824	230.528	459.561	245.899	257.068	65.0249	329.081	112.575	116.794	105.867	25.7226	50.2771	14.5936	14.0527	7.04419
1437360_at	Pcdh19	279653	36.9521	24.6326	49.2742	44.7861	51.4971	31.9136	89.0688	37.7426	83.5988	57.7675	5.90618	6.37483	5.35961	5.45708	5.7524	6.05793	5.72732	6.32138	5.62444	6.37874
1437388_at	Fut10	171167	12.3032	9.45702	9.39605	37.3264	12.2507	10.732	33.9511	17.2918	31.1078	39.8571	10.9307	24.1009	9.40007	9.68329	9.48396	9.14078	10.0218	9.63246	9.79197	9.86569
1437396_at	Creb3l2	208647	145.921	93.2298	228.436	191.782	219.619	132.827	271.657	143.517	245.882	163.673	55.9603	66.2947	43.4482	15.3697	11.9682	44.6114	14.6097	13.2885	17.3804	26.3259
1437415_at	4933427D06Rik	232217	628.409	564.262	1438.5	678.554	703.093	576.406	1446.54	649.262	846.846	803.668	60.2667	103.092	75.9077	18.6064	18.1109	12.7593	18.5587	14.1378	15.8116	14.5453
1437467_at	Alcam	11658	43.3611	12.114	24.7735	10.5146	43.5231	59.4805	13.7403	24.008	39.7117	11.0815	11.5748	10.1826	9.60363	10.6492	10.4665	10.2688	10.6862	10.1819	11.0975	13.8206
1437474_at	Gatad2b	229542	575.745	435.67	916.841	977.119	780.661	619.406	1308.47	618.282	1037.32	864.915	201.732	239.933	298.278	119.152	93.4567	80.2942	107.769	132.924	141.426	212.252
1437487_at	Myst3	244349	49.1813	32.9019	8.1282	43.524	65.7767	61.7864	61.317	59.5367	24.5536	7.58899	7.2531	22.6802	6.94121	16.2064	6.99321	4.97747	6.94198	4.90278	5.2335	6.0507
1437495_at	Mbtps2 /// Yy2	100073351 /// 270669	602.958	365.592	658.874	173.3	452.439	204.617	399.913	329.035	204.178	229.353	112.342	53.2732	16.5449	12.6437	13.1433	5.8316	11.0563	4.11783	11.3968	11.7968
1437503_a_at	Shisa5	66940	233.79	142.696	149.058	511.802	215.322	65.5575	94.3516	166.242	88.1994	58.1939	59.5256	140.067	101.615	61.1128	70.4944	44.2777	79.9804	55.4784	57.5316	56.7642
1437533_at	Xiap	11798	529.076	532.751	645.351	473.153	484.574	544.29	431.456	385.777	353.299	226.127	179.762	120.39	46.1395	27.2451	9.19123	5.70084	6.22987	6.00842	5.67131	11.2202
1437543_at	Fubp1	51886	326.596	547.642	278.071	262.783	525.386	1741.99	723.631	629.251	849.757	192.44	380.325	197.911	513.271	162.193	109.812	240.108	174.387	231.825	117.26	153.697
1437557_at	D3Ertd254e	241944	30.4717	27.992	73.6383	14.8841	18.7243	22.4697	21.3766	10.153	26.3246	20.5299	8.02432	17.3954	7.87789	8.64245	8.12397	5.75761	5.24415	4.36519	5.49	5.96168
1437584_at	---	---	68.0899	20.5324	45.8323	170.274	203.057	147.64	121.414	193.609	230.36	138.793	92.414	147.198	57.415	14.5531	6.61422	9.2725	10.1124	6.20287	6.41303	25.532
1437585_x_at	Zfp161	22666	759.089	389.805	571.165	290.183	871.202	346.653	344.806	485.663	215.758	206.922	92.6887	116.467	59.6797	33.5901	18.0052	143.965	43.1874	14.9969	61.0374	146.603
1437591_a_at	Wdr1	22388	77.539	264.642	408.671	749.343	113.261	275.293	465.482	53.4708	290.467	643.292	84.9283	19.7359	123.793	14.9566	18.2568	36.1456	20.2145	105.932	119.133	29.3323
1437634_at	Thoc2	331401	24.1583	17.8163	76.6744	24.3432	27.07	32.0516	37.922	12.7474	19.5849	13.1111	9.67963	8.66362	5.53064	5.89545	5.64564	4.00704	5.73985	6.50742	6.08428	9.27484
1437658_a_at	Snhg1	83673	51.7105	36.2586	79.2066	16.2325	52.7824	66.257	15.1729	51.4607	54.077	13.862	13.8698	22.48	9.13265	10.453	8.31253	6.75626	8.53248	7.87286	9.02262	9.71666
1437667_a_at	Bach2	12014	35.0947	12.1196	12.2775	56.8153	54.0811	30.0675	45.4089	30.081	35.6423	22.1539	10.3144	8.63326	9.93481	8.25805	7.80814	7.91477	12.509	10.6112	8.16668	12.6343
1437687_x_at	Fkbp9	27055	4366.87	2166.38	2125.27	7159.36	6306.02	3183.78	4390.65	6488.14	4479.61	4872.81	1878.74	2629.19	1662.56	373.988	214.591	47.465	392.663	106.232	50.7506	60.8119
1437694_at	---	---	135.862	107.185	119.791	60.878	81.829	37.0204	130.169	36.6342	31.4842	43.5087	31.0812	26.6113	18.5651	32.6959	27.1823	16.6567	13.2666	14.0585	22.0829	16.2726
1437709_x_at	Ttc13	234875	873.331	626.249	844.332	624.254	811.151	598.845	548.287	648.115	459.309	305.607	203.621	246.405	207.625	90.061	74.7518	30.0258	49.4192	9.25529	4.91938	9.80325
1437719_x_at	A230046K03Rik	319277	432.453	286.639	110.605	285.09	471.85	314.936	332.128	333.532	185.439	199.241	132.197	118.53	55.2724	89.2899	37.4574	47.1665	59.6335	48.7075	19.3365	52.9503
1437738_at	Atp2c1 /// LOC100045884	100045884 /// 235574	1242	1831.79	2494.64	1227.31	1260.51	2429.02	1942.92	693.76	1340.37	1279.63	430.522	245.131	215.363	60.0181	79.7775	64.887	156.625	206.752	88.9215	103.435
1437752_at	Lin28	83557	997.49	266.264	244.52	2159.92	1653.7	405.536	838.018	1651.55	1484.72	1558.9	309.455	1223.5	732.414	125.546	44.6536	12.8701	42.7964	11.5416	26.5919	14.6762
1437829_s_at	Eef2k	13631	3312.63	1726.59	1468.51	3332.23	4777.29	2638.29	3642.05	4282.33	3311.3	3619.9	1416.58	1501.87	822.133	477.716	467.018	331.345	504.193	358.932	360.19	305.112
1437834_s_at	Pacsin3	80708	94.5649	46.4889	114.584	26.1286	84.9604	79.3052	87.2963	31.3555	36.7951	39.0828	8.63438	4.26988	3.78423	3.84707	4.37931	3.65565	3.85695	3.86487	8.67104	4.79237
1437865_at	Spata13	219140	20.1572	10.5772	34.0523	30.1046	37.0587	16.1752	38.7786	13.1638	28.6047	33.88	10.0671	9.55288	9.51779	9.37409	9.2294	8.07355	9.60558	8.97675	9.85131	9.63679
1437869_at	3222402P14Rik	235542	201.059	167.963	73.5665	104.06	213.52	253.465	176.367	215.04	151.538	79.8767	68.2539	57.1812	7.18865	18.4431	10.7829	7.43993	55.1334	19.5941	16.0361	19.077
1437873_at	Zfp799	240064	43.2516	14.3182	31.2902	34.0991	19.494	8.83469	10.9891	28.7775	17.0232	18.8664	9.10852	15.2696	8.49147	8.77458	8.84575	8.24042	8.96202	8.74343	9.04705	8.67789
1437874_s_at	Hexb	15212	812.726	188.227	73.037	414.331	442.138	20.4494	20.1808	64.3915	32.9579	37.2328	25.0496	30.0152	10.5143	17.1633	8.82685	10.675	25.9015	20.0046	18.2659	9.72147
1437878_s_at	Ttc14	67120	480.303	1199.28	1724.3	1408.92	678.809	2477.64	2536.37	562.545	1085.73	1300.08	705.947	262.674	467.734	111.456	125.289	153.831	108.268	408.771	198.455	293.771
1437917_at	D530037H12Rik	96893	52.4322	61.4876	52.7919	93.6387	108.594	205.855	165.875	83.4435	121.027	101.976	23.102	25.8468	13.0444	10.5033	11.0526	5.83154	9.28447	10.5212	6.45904	10.7945
1437957_at	7030407O06Rik	320392	303.309	119.262	206.441	117.845	333.451	261.22	186.188	223.015	290.977	52.3369	42.9857	64.1909	90.2985	70.5312	34.835	74.6157	50.6557	33.5981	71.7379	34.7281
1437965_at	Heatr1	217995	33.3466	72.1908	135.221	47.8537	64.0753	196.223	93.5047	48.7462	36.1896	50.0466	26.3371	25.942	24.1264	22.0483	9.76439	22.4768	9.72572	15.4447	10.488	16.3193
1437983_at	Sall1	58198	32.481	14.5425	14.5919	12.6634	50.0045	12.4311	29.736	59.3974	33.1979	27.8869	16.1913	36.0878	14.5317	17.0518	15.1128	14.7049	15.1249	14.763	12.7338	15.3321
1438012_at	Ppm1l	242083	57.3426	46.4594	32.9125	106.646	76.2913	89.0592	154.726	94.7644	121.815	76.1916	16.4624	15.6359	23.2761	8.98788	4.53452	6.07827	5.31974	5.2393	5.5526	9.33131
1438015_at	Dkc1	245474	1162.25	463.592	438.766	792.616	1070.05	652.796	1014.12	812.099	774.169	418.5	171.881	197.199	105.028	45.2213	26.1854	14.9974	19.0175	8.25084	17.7405	18.3478
1438032_at	Lrch1	380916	103.308	20.7073	44.6584	126.889	95.8908	26.8197	66.8247	107.11	67.7179	78.2446	10.8025	57.4205	28.8448	20.4423	19.4182	12.7811	25.2124	26.2774	39.0868	13.6997
1438033_at	Tef	21685	164.478	127.953	68.829	182.917	199.325	230.547	343.184	122.412	176.702	58.9756	122.347	30.7144	51.2834	24.7227	19.3802	31.0057	21.1359	23.2096	25.693	24.5831
1438131_at	Fbxw2	30050	126.638	81.3324	121.214	219.155	151.427	248.99	456.196	116.75	257.66	74.5723	72.6943	36.2625	69.6244	16.0766	15.536	21.3299	17.6998	16.5044	16.6433	31.7815
1438137_at	---	---	65.8447	58.9841	46.5292	98.337	136.712	269.858	212.369	57.7957	135.817	23.2446	66.9271	35.2026	52.4977	24.2457	19.5643	26.0456	39.2053	72.3119	20.3702	31.8864
1438195_at	Gpd1l	333433	9.81234	6.73554	11.1139	39.4505	15.5021	6.58517	19.3537	25.697	21.1718	27.5834	4.38455	8.69202	4.42194	4.33171	4.27446	6.40764	4.76413	5.05035	4.31393	6.75647
1438200_at	Sulf1	240725	33.6929	20.2298	17.9208	78.8108	52.5886	31.9033	28.7441	77.5143	60.8779	55.8136	21.9749	63.3309	20.2775	20.753	20.4624	28.5204	30.0806	38.3113	19.5406	20.9241
1438224_at	Zswim5	74464	650.484	359.405	534.822	909.843	1099.99	698.556	1210.93	1120.22	1170.22	1039.84	325.609	368.349	263.951	69.2987	47.4361	20.9739	53.9272	36.2023	35.54	8.72467
1438237_at	OTTMUSG00000010655 /// OTTMUSG00000010694 /// OTTMUSG00000011070 /// Rex2	100041379 /// 100043034 /// 19715 /// 667666	399.659	135.61	247.04	720.356	547.692	163.64	337.614	755.832	592.29	578.252	99.3853	544.338	289.537	198.794	204.426	121.517	248.441	112.419	117.209	304.579
1438239_at	Mid1	17318	40.4376	57.4142	116.683	77.3301	48.6963	153.853	93.8611	52.4295	23.7079	51.0493	15.4042	11.8825	6.19765	6.29118	9.63769	9.32613	8.18852	7.19305	6.31511	155.617
1438247_at	Klhl15	236904	247.833	149.05	191.273	266.722	469.615	416.617	655.338	503.374	664.924	396.231	199.846	132.152	81.3589	23.5721	12.7222	13.1392	101.324	163.823	93.1218	19.2841
1438255_at	Foxn3	71375	311.892	236.472	236.466	370.847	477.574	279.408	388.767	482.101	280.273	386.547	73.5918	92.2382	63.2234	25.4331	13.8512	12.2158	27.3966	25.9722	14.0152	21.2959
1438257_at	---	---	88.5347	113.754	63.3337	52.1941	120.13	281.528	108.706	79.1673	158.614	43.2918	45.2989	46.0511	99.8783	44.2974	39.9288	56.1249	20.2446	27.4481	21.5496	18.7987
1438277_at	E130308A19Rik	230259	69.9518	70.8331	30.9253	89.6888	100.66	192.916	76.1039	63.0475	84.5431	62.2786	19.8097	18.2801	18.9323	4.71282	5.29294	8.41343	6.95418	4.32653	5.43791	8.63222
1438305_at	Rims1	116837	145.772	66.2991	75.1404	180.707	244.628	128.025	184.039	311.752	213.354	212.077	59.769	66.0277	33.905	13.6348	7.49832	10.1296	12.0124	11.0725	8.06891	16.9851
1438333_at	Prtg	235472	11.1871	9.29742	10.1544	85.0616	15.3186	10.0007	58.1462	24.4254	18.9234	52.0186	14.0906	10.807	10.0943	10.1843	9.4869	9.81882	9.10839	8.93049	9.98691	16.4198
1438349_at	Zfp229	381067	105.19	33.1292	123.234	27.1009	81.6704	31.4458	37.6314	64.417	40.8576	31.3608	13.1461	20.2473	12.6352	13.0844	12.0908	11.1969	12.036	11.956	12.3753	12.0082
1438391_x_at	Hsd17b10	15108	302.632	157.104	241.54	130.682	208.318	87.2014	181.318	147.62	86.0402	107.045	44.5634	53.9792	12.2936	9.90005	12.4743	6.13381	16.6484	10.9945	9.93523	8.94114
1438398_at	---	---	685.903	552.878	848.485	338.793	910.74	1521.92	643.376	655.785	1122.12	371.65	343.787	222.568	641.467	193.488	140.471	264.313	83.8995	73.7856	100.535	91.543
1438402_at	Fam171a1	269233	121.252	108.281	260.618	366.647	223.813	139.29	332.881	191.534	322.818	316.026	64.6395	62.6994	33.2638	7.71677	7.00292	5.20435	6.98149	5.31606	5.52354	8.1657
1438410_at	Prtg	235472	105.62	26.3225	51.1621	359.53	178.302	73.093	165.557	239.227	310.522	272.841	19.0313	128.328	144.669	20.1631	10.0979	11.1677	10.2295	6.85602	10.866	10.3085
1438412_at	---	---	722.254	553.18	927.421	1041.54	1004.28	752.405	1082.21	902.575	1247.21	987.504	307.518	322.966	236.756	49.8222	18.9819	6.30285	12.8346	5.4269	6.91092	6.24634
1438413_at	Senp7	66315	105.18	83.6654	236.19	81.474	59.8027	57.1676	97.6064	30.7567	33.7669	53.7998	11.4155	24.2479	15.9816	34.9806	29.4673	23.557	9.21983	25.0369	34.9904	31.7553
1438434_at	Arhgap11a	228482	333.563	297.851	736.675	435.536	517.23	560.717	1117.34	495.515	1006.81	1005.32	177.124	275.979	276.799	159.443	215.552	251.215	155.634	138.957	196.113	200.592
1438454_at	B430203M17Rik	320193	280.896	168.333	126.655	36.324	350.957	372.09	161.829	172.568	269.7	47.0502	39.3709	74.2525	204.989	89.4257	102.142	87.4032	39.7819	35.389	20.6813	37.8494
1438477_a_at	Mcee	73724	80.1911	47.0544	59.5529	34.6613	24.846	27.8153	14.2287	43.557	23.903	14.3162	18.5439	24.8327	8.423	13.5593	10.5511	10.1586	17.1099	11.0416	4.57791	10.9851
1438494_at	Hrh1 /// LOC100041871	100041871 /// 15465	47.3941	23.9766	24.7558	55.6236	96.288	57.323	70.889	92.1641	101.131	64.6077	31.9878	36.2512	31.2769	7.12539	29.145	6.91666	7.05779	7.0379	8.67067	6.70554
1438501_at	100040123 /// EG383032 /// EG665772 /// Rps17	100040123 /// 20068 /// 383032 /// 665772	39.3491	39.9331	74.2319	35.1733	41.5549	55.058	23.6453	16.5607	40.3808	13.538	10.4882	6.93271	9.72291	8.67619	8.61108	9.65452	7.5066	6.51753	15.7536	9.72755
1438504_x_at	Tm7sf3	67623	1059.33	694.903	922.221	291.228	771.702	497.72	309.66	381.243	230.966	155.45	226.884	121.221	78.6699	61.5866	73.5848	45.6751	185.498	107.066	79.9654	24.3242
1438527_at	EG242809 /// EG545545 /// EG545864 /// EG547402 /// OTTMUSG00000008543 /// Rpl3	242809 /// 27367 /// 433745 /// 545545 /// 545864 /// 547402	94.1953	182.017	144.297	145.395	154.385	696.54	510.098	120.594	306.133	185.037	215.454	29.76	14.8249	10.1961	11.5826	8.02539	9.60509	6.23263	9.58909	9.26982
1438533_at	Myo9b	17925	41.6818	50.3898	43.7254	69.7886	47.2952	79.2925	54.3366	16.1446	28.9086	23.7536	9.26542	8.99101	16.0492	7.38645	7.4356	5.53547	5.67751	4.89272	6.91503	10.4278
1438541_at	4933439F18Rik	66771	30.8068	39.7791	30.3845	33.2339	55.6006	158.879	87.4759	29.3212	74.123	26.0997	34.1125	22.837	52.6425	17.1364	16.8305	23.4377	22.0733	27.9774	24.0525	23.9748
1438543_at	---	---	8.16855	8.60176	8.10658	40.4693	25.7073	46.4305	26.5885	13.6739	19.3685	7.79817	8.24369	8.13283	7.76906	8.09597	7.93004	6.99192	8.40403	7.19149	8.23971	15.3606
1438567_at	Vwa2	240675	20.3546	9.11066	8.96904	57.3389	23.8174	8.12048	17.091	26.9693	21.8625	31.0499	11.0612	30.322	8.97592	8.90249	9.63354	8.24863	8.6753	8.64866	8.53688	8.52835
1438629_x_at	Grn	14824	2069.23	1045.85	1273.26	1132.35	2012.07	1505.83	1265.87	1173.66	868.933	753.862	375.905	345.265	138.913	79.3399	88.6718	42.7677	140.372	55.5914	43.7624	57.7607
1438634_x_at	Lasp1	16796	916.909	335.411	345.953	1139.42	1250.61	278.873	456.703	1633.13	978.609	930.411	358.212	1025.91	307.01	279.417	449.439	136.554	635.347	253.009	189.064	118.684
1438640_x_at	Pgk1	18655	713.226	411.907	513.436	301.24	622.195	382.05	368.615	445.298	236.779	189.278	179.3	128.214	60.5941	33.5624	71.458	32.5801	95.272	31.5349	3.36804	3.31751
1438666_at	Ldlrad3	241576	120.38	75.3299	136.422	242.162	161.308	113.784	205.783	146.26	183.685	202.308	58.902	68.2304	69.5717	13.2618	6.3926	11.3902	6.30589	12.7362	13.7483	13.2158
1438671_at	Ppp2r2c	269643	83.5288	189.21	141.509	328.691	138.634	144.441	276.825	117.354	266.161	142.853	66.191	58.771	53.5625	11.4945	11.6671	28.4199	12.972	10.2413	13.9698	12.1856
1438690_at	Tyms	22171	45.0068	75.4352	58.3775	41.7693	29.157	109.058	35.6179	16.7435	24.5591	20.8816	11.8775	11.6869	8.81891	10.0946	10.3073	8.00145	10.7547	10.9044	11.1952	13.8159
1438691_at	Zzef1	195018	298.447	166.144	297.06	183.712	389.451	395.256	253.093	231.059	297.165	85.7072	125.428	115.286	99.6612	85.6468	81.2525	66.9542	95.244	87.1214	63.2832	31.876
1438705_at	Cbfa2t3	12398	58.0794	39.0633	61.3505	52.8781	115.676	51.7502	182.911	119.472	138.681	146.352	36.457	26.4214	20.0673	16.2256	14.5469	13.2932	20.1301	14.3739	13.2047	20.1189
1438719_at	Map3k2	26405	154.877	115.108	69.4171	81.3143	116.833	142.599	87.1678	93.2707	41.0809	29.677	45.7644	34.6238	24.9259	43.2448	24.7274	16.7295	29.8258	23.7996	15.2995	25.8495
1438736_at	Thoc2	331401	540.482	368.078	198.303	358.078	640.22	447.951	497.954	426.824	383.552	197.036	155.719	128.539	79.6162	42.8807	55.8817	16.7973	121.177	92.5754	71.483	103.604
1438762_at	---	---	47.9059	117.83	137.334	35.0787	159.636	400.086	110.355	125.759	173.933	69.6657	71.8479	34.4727	27.8938	11.7775	11.7139	10.0558	12.9843	11.633	13.4069	16.1484
1438788_at	D5Wsu152e	28022	93.3217	119.747	94.4073	36.4903	124.242	603.828	45.0437	96.6246	304.08	30.4747	67.6523	39.5349	128.182	13.582	13.0832	37.5691	6.72164	20.9828	13.7507	4.96321
1438798_at	4931406P16Rik	233103	183.89	168.865	17.9171	128.401	168.057	180.804	167.166	243.292	49.1424	51.5168	49.7635	51.9481	11.701	33.7617	17.0784	8.23274	10.2054	10.1016	10.7558	10.8918
1438803_s_at	Snx16	74718	1082.12	815.793	1172.59	383.947	957.654	706.884	623.561	626.872	464.332	258.675	265.735	124.749	67.9309	53.3622	28.2259	7.06076	28.543	11.8781	8.815	11.4003
1438805_at	Ccnd3	12445	74.8194	32.1433	26.5737	143.918	92.5177	32.7885	38.3177	171.833	156.139	86.5278	92.2162	148.513	40.9693	35.0158	24.0853	20.835	19.9962	19.9417	25.3195	24.6811
1438824_at	Slc20a1	20515	39.0937	113.794	58.8507	62.8306	59.2457	251.195	168.81	31.5253	41.3984	39.3193	36.0547	26.4292	20.885	5.36823	8.71835	23.1074	8.69916	8.57008	7.58155	7.22552
1438833_at	Casc5	76464	204.612	118.342	80.117	86.0814	241.605	245.262	405.296	244.875	149.934	19.0992	103.11	51.2644	76.5528	153.898	96.0042	83.7366	47.6105	169.601	54.4835	102.593
1438848_at	---	---	52.3255	45.3615	33.4983	20.891	72.7449	240.583	63.7798	29.7024	100.742	17.582	21.0857	16.2776	49.3407	26.5333	17.9766	50.3647	12.937	12.2648	11.2116	12.9801
1438858_x_at	H2-Aa	14960	1321.51	334.787	72.3604	802.026	771.641	20.3529	13.0016	83.1186	5.05525	12.083	16.133	18.3428	7.91234	14.9591	9.13062	5.25942	17.8617	9.12851	10.4327	6.06407
1438861_at	Bnc2	242509	1444.96	461.386	434.236	2429.33	2436.12	795.184	1440	3099.23	1676.77	1755.33	651.811	1929.31	755.964	202.661	126.936	52.2885	608	412.465	291.089	256.889
1438900_at	Sacm1l	83493	83.7538	57.6498	76.4077	75.7094	115.951	214.781	140.265	67.5259	147.793	75.9744	33.1242	39.8321	47.4088	20.6883	9.16017	24.3777	7.18426	7.92146	7.6735	9.65291
1438912_at	Hdgfrp2	15193	62.7025	229.486	281.007	138.592	56.1423	449.805	212.89	50.7107	224.185	63.7383	119.803	42.5475	206.877	23.5444	38.0693	75.54	20.2031	39.5691	42.9845	27.252
1438976_x_at	Mat2a	232087	378.56	344.026	483.557	202.442	557.934	501.576	608.706	651.986	576.973	391.48	231.865	193.705	229.742	150.247	157.99	139.05	86.2003	60.4534	52.2252	37.6436
1439012_a_at	Dck	13178	4613.61	3710.98	5059.98	2656.12	4129.16	2366.65	2029.88	2652.39	2071.23	373.573	859.01	452.072	262.886	199.692	135.593	65.0911	163.645	75.4204	64.2753	104.52
1439015_at	Gfra1	14585	88.8474	45.6392	57.8449	166.312	99.9633	29.1042	76.7589	100.899	98.3516	104.874	44.016	56.7284	23.8407	12.1402	6.67557	5.99092	7.2152	17.8713	6.40793	12.2032
1439023_at	Ddx55	67848	446.091	324.781	260.373	208.755	504.092	352.798	405.022	211.651	158.354	139.187	102.578	121.384	115.227	106.639	75.6633	39.0634	40.3455	16.361	18.2052	23.4284
1439032_at	Haus2	66296	552.773	628.537	1144.54	438.856	420.603	444.333	605.466	375.017	341.256	291.797	61.048	156.02	111.1	97.3934	69.8639	25.8911	25.8048	23.6064	15.1825	25.8339
1439059_at	BC031748	245622	525.439	287.65	549.827	172.774	656.045	256.333	327.311	361.526	338.03	185.659	87.6785	9.88058	25.9277	15.8052	10.9139	9.28973	11.7117	10.2341	11.7321	13.9218
1439068_at	Erap1	80898	37.7035	8.66197	14.21	92.6957	58.4267	17.9024	53.4731	91.4639	68.8534	53.2644	13.4293	30.8203	22.0987	9.46917	8.59675	6.18393	8.54771	8.5411	7.24353	6.96139
1439082_at	Ddx50	94213	251.225	251.52	185.069	248.258	354.122	950.561	419.049	231.234	434.225	157.776	154.979	88.3248	313.618	88.4	75.4375	134.727	104.38	126.94	120.619	111.786
1439106_at	Zfp462	242466	315.601	62.2459	37.2748	443.68	555.356	66.1006	143.97	498.091	239.072	255.833	69.3558	347.474	145.371	51.1987	10.7531	24.998	10.2007	10.031	8.90076	51.207
1439126_at	1110007A13Rik	210711	125.216	117.063	178.29	67.7937	217.008	218.704	153	163.035	104.235	77.0998	66.7829	18.4374	28.0483	15.4446	14.8973	14.3372	17.4873	13.2921	14.6711	15.1413
1439127_at	AI314180	230249	116.475	29.0704	54.0812	71.6622	139.589	36.1589	118.988	110.69	255.784	19.7549	29.5398	33.4823	28.6692	66.3856	25.8171	13.8699	12.0026	8.88113	9.32888	9.31053
1439136_at	---	---	71.3978	55.7103	95.5282	73.7074	144.075	178.851	98.9953	89.1179	154.116	87.6411	9.84007	34.6081	29.2335	7.91704	7.37111	10.2157	5.77144	5.38413	6.94325	8.94906
1439158_at	Tlk1	228012	49.1489	41.8588	16.9508	67.8394	54.8969	28.0654	81.4058	40.8008	35.5796	34.9938	15.4024	15.2796	13.0565	18.7179	13.7001	7.65274	8.10895	10.057	8.15414	6.77802
1439163_at	Zbtb16	235320	991.758	311.559	380.278	1502.68	1635.57	428.305	918.285	1614.68	1183.04	924.441	244.737	911.275	690.911	84.374	20.7492	11.4779	48.5629	5.69159	6.95638	5.72339
1439166_at	Nol11	68979	47.8202	23.7535	26.6346	18.7564	64.3565	77.4337	44.3351	23.8603	54.0435	22.0193	22.2819	20.8554	29.6568	21.3821	21.1092	22.7928	20.1041	16.6889	6.67755	17.154
1439170_at	---	---	30.8569	19.9573	13.8844	10.1521	33.1348	54.371	25.523	21.3983	26.7799	9.64432	7.1058	7.29746	7.67697	4.76664	5.89385	6.96862	4.32328	4.67271	4.76638	7.2203
1439180_at	Ino80d	227195	373.236	219.779	132.372	248.689	481.017	261.464	438.546	385.631	327.779	201.057	138.252	132.548	116.822	83.2711	41.1855	45.4033	36.6556	11.2089	16.9646	15.411
1439189_at	Fnip2	329679	215.929	500.722	879.553	853.925	461.114	592.035	1309.87	274.747	610.569	1048.83	179.716	123.755	131.361	33.7379	18.3296	18.3441	24.4252	8.45652	8.67673	11.8786
1439209_at	Tcf12	21406	225.318	112.679	80.4298	58.4271	282.059	298.405	115.096	190.842	218.158	61.3255	61.3972	77.7212	80.4486	17.1466	21.4593	8.83001	76.5751	51.5908	38.3557	60.5402
1439252_at	---	---	100.508	61.9765	131.775	54.2185	173.64	233.694	146.691	127.252	163.939	52.8249	46.6733	29.8713	59.9336	17.9891	16.0364	54.2888	15.988	30.8675	38.5834	19.2886
1439276_at	Adar	56417	103.67	88.0482	99.0227	35.0951	146.08	170.439	82.451	92.9369	180.659	55.7372	28.8801	20.6396	38.2312	9.4625	7.40214	8.47032	7.4327	7.20882	7.85914	6.22801
1439300_at	Chic1	12212	83.6646	119.188	52.398	29.2494	61.7208	113.974	47.8199	37.0461	22.9052	9.65604	21.3624	17.0027	7.38532	7.82647	7.69203	6.82455	7.69293	6.87877	8.0054	8.51387
1439301_at	---	---	58.2947	49.1737	22.1218	19.0357	53.7668	209.614	15.3043	31.6686	65.1803	19.3603	20.949	20.2782	19.3522	14.4824	5.90051	13.7137	20.4088	20.3138	20.6835	20.3956
1439316_at	Rbm39	170791	62.109	31.1189	37.2344	17.7299	78.7613	146.659	31.0438	61.803	112.236	10.8985	28.4543	24.0696	57.7523	16.2181	11.5003	20.5805	7.94822	16.1521	5.94875	5.36512
1439324_at	B430006D22Rik /// Tet3	194388 /// 320786	138.232	24.115	30.9159	230.869	144.724	52.4276	289.878	34.8044	89.914	94.0505	20.8439	52.8213	20.7962	21.6794	22.6004	19.9677	24.2003	19.0995	22.9264	24.1658
1439341_at	AK220484	381157	125.419	73.5937	89.8988	70.8711	187.589	167.891	89.0667	73.056	53.3848	41.661	27.0379	26.326	11.9933	12.2334	12.0792	11.5094	15.4767	9.69931	12.546	12.0043
1439344_at	---	---	34.2613	26.8116	74.0333	8.74351	48.5841	103.341	17.2055	16.3618	47.543	18.4851	9.1344	7.69457	5.57871	5.01533	4.96921	6.15189	5.58047	5.83034	5.06623	5.57954
1439349_at	Sbno2	216161	49.4101	42.7214	77.3878	81.2399	97.6592	118.378	109.988	64.9547	66.653	52.9905	16.6169	22.8923	16.2097	13.4451	13.2342	9.77025	11.5112	13.0875	14.0933	13.0447
1439363_at	1200014J11Rik	66874	22.2381	14.7168	18.1286	8.75643	43.5826	80.7466	24.3467	24.7723	25.1316	7.4013	6.95776	10.0237	9.55556	7.73249	8.44472	11.3253	13.8211	8.72661	5.71175	7.08272
1439364_a_at	Mmp2	17390	18.0232	10.9016	7.98137	96.5795	41.7479	9.70609	13.2712	45.4506	16.0474	29.0374	9.34199	30.7521	15.8727	11.3906	9.00639	8.39069	10.9828	11.2921	9.34358	8.14241
1439408_a_at	Med1	19014	203.696	74.6342	183.811	25.029	157.985	84.9819	95.417	71.0845	50.5988	37.0937	21.4439	11.3116	10.354	10.7969	10.6366	9.94475	10.5885	10.2607	11.4984	10.5833
1439428_x_at	Gmds	218138	103.654	46.2983	101.875	25.6693	168.216	82.7027	45.8395	130.419	31.0832	29.4697	23.0153	31.1155	17.489	24.8523	27.2333	16.2409	32.678	21.1328	24.0085	27.9254
1439441_x_at	Lats2	50523	515.681	288.149	433.365	615.982	805.843	350.138	613.078	725.4	510.828	615.157	269.134	190.66	115.1	73.5187	58.5457	37.0354	199.392	97.748	87.366	78.123
1439450_x_at	A230046K03Rik	319277	409.337	402	113.476	327.225	416.007	340.496	279.22	358.639	175.157	163.566	131.668	105.773	48.2332	81.4318	47.2294	13.113	27.8863	24.028	14.8431	14.4807
1439470_at	---	---	39.1963	54.7266	64.4575	20.992	44.0042	220.166	53.3988	27.9372	45.0485	43.4567	29.3788	8.08371	16.5066	16.7488	8.04555	24.9026	14.3507	13.1028	9.84912	14.3592
1439478_at	Acot2	171210	166.203	66.3446	194.229	86.6818	206.269	112.416	184.369	86.8864	74.0495	93.8209	15.6918	18.5584	14.0787	14.6119	13.992	13.5525	36.1389	14.2942	38.2421	16.3309
1439510_at	Sgol1	72415	58.7194	40.5379	57.3541	49.0951	105.611	73.6244	116.508	119.636	60.8339	119.079	28.5629	37.6407	11.4903	9.10157	6.07758	8.65514	8.24782	7.00231	9.18109	8.9543
1439523_at	D330027G24Rik	399584	5.28324	18.2048	100.88	150.826	5.3759	25.9984	101.741	5.23938	7.08861	106.026	5.41863	5.18262	5.34331	5.36067	5.31874	5.8211	5.27287	5.23571	5.43328	5.28481
1439540_at	2010-03-02	224703	23.6749	36.9461	25.1659	31.5245	37.58	60.8783	51.7645	20.2575	52.3962	11.6817	9.81259	9.59099	7.50809	10.3235	8.82424	6.91969	10.1398	10.0254	7.25823	10.0096
1439545_at	---	---	10.4081	32.2559	26.5057	8.71525	10.3856	65.249	38.2771	7.49068	21.5797	18.9837	6.14811	6.46677	7.54734	4.35885	5.85103	5.34774	5.6696	4.80921	6.1192	6.4344
1439555_at	Rlf	109263	83.1569	29.8831	25.6711	28.8759	101.574	45.0665	52.8565	57.399	31.3775	10.2543	20.7802	12.8729	10.1331	20.2756	10.8442	9.16519	10.7323	15.9084	11.3901	19.897
1439562_at	F730047E07Rik	212377	1202.41	1458.51	1840.67	840.911	789.882	830.275	941.934	649.601	779.282	508.352	506.22	251.126	130.126	64.1382	64.6814	31.6238	40.9682	9.34287	11.2128	9.38194
1439570_at	Fam59b	242915	79.2339	57.4694	78.6799	218.898	154.624	71.5016	151.661	133.318	181.371	200.25	28.3943	57.1301	53.2086	13.2985	10.3403	11.883	8.46148	8.42966	11.3322	14.6859
1439582_at	Macf1	11426	18.6496	7.73094	8.77142	10.0702	97.1637	46.9316	10.281	53.9656	12.4775	7.35374	16.98	10.5144	11.8492	7.66342	6.72816	29.1753	9.28517	10.7658	9.7046	22.4501
1439612_at	Cacna1b	12287	22.3859	34.9508	35.4995	74.7018	51.1956	88.7458	53.1325	50.389	152.483	84.9502	34.6834	21.7724	29.0839	17.1106	16.8253	14.7196	16.8093	9.16278	14.1432	16.3287
1439619_at	Tcf12	21406	62.7673	36.2694	59.7831	22.2836	78.8454	85.4298	35.4076	36.704	38.5562	17.7259	23.0437	20.6051	16.685	6.13758	11.2877	5.75953	15.0721	13.7142	11.8325	16.223
1439639_at	---	---	36.3577	19.424	18.5189	24.7653	56.832	61.8112	44.4209	20.5806	61.4059	15.2944	10.7914	12.5886	15.4106	8.89556	8.12586	7.55994	8.09656	7.0578	8.43344	8.09417
1439650_at	Rtn4	68585	49.7134	39.2494	14.2047	26.2323	65.1055	117.126	56.5378	36.6448	31.9927	16.8404	17.2793	14.5911	10.0589	9.29967	5.39566	13.4977	15.2787	14.7819	15.766	15.6786
1439662_at	Homer1	26556	183.496	126.236	270.549	140.22	185.655	173.857	196.911	111.109	138.211	80.3789	38.8142	41.5397	22.6636	13.4123	10.9947	7.9283	45.8369	41.6036	45.0375	22.0109
1439678_at	---	---	329.009	355.921	419.56	165.755	511.346	1368.69	613.192	305.526	620.057	369.484	300.389	85.0191	165.823	18.3282	12.5171	25.0376	12.4631	12.3976	13.2966	20.8165
1439687_at	Rab14	68365	75.9584	17.2432	6.54617	5.38905	82.9552	106.81	6.7423	53.3728	16.6201	5.07046	14.1208	9.81336	7.037	8.68912	6.54811	6.48596	7.28697	6.59	6.62186	13.8072
1439705_at	---	---	16.1541	11.6048	13.8817	6.89518	31.926	54.5882	13.8368	13.882	11.9543	11.7518	5.61815	7.52636	7.43452	7.34915	6.98634	7.30831	7.26566	7.24463	7.37574	7.61076
1439739_at	LOC100047259 /// Tsp50	100047259 /// 235631	987.915	1263.52	1317.26	118.069	916.192	2294.8	507.259	639.448	1631.02	192.081	2093.12	156.916	178.684	16.0515	36.141	8.34855	36.6771	8.28558	7.39424	7.21923
1439754_at	Sox12	20667	97.9832	34.3311	62.0318	89.8486	121.902	44.1372	103.902	77.1147	62.0161	65.4974	24.2071	19.5345	14.0856	23.4642	11.9124	10.9865	21.0921	11.2204	14.6976	16.1599
1439764_s_at	Igf2bp2	319765	29.9516	13.9601	8.05376	73.7817	50.8381	10.6014	13.4666	68.6391	23.2839	35.0654	15.7283	55.0338	9.44434	27.7059	8.37384	8.54131	9.44024	7.71436	10.4592	9.78659
1439768_x_at	Sema4f	20355	832.72	619.985	794.564	274.483	877.042	818.088	543.263	449.626	484.657	243.775	232.55	48.3521	35.8845	29.8604	7.67504	6.76022	12.5175	8.49703	6.35312	7.53237
1439775_at	Brwd3	382236	35.8669	11.5632	16.8911	31.7439	35.2095	10.9916	17.3221	31.0225	35.7468	32.4119	12.7079	12.7242	10.5986	9.39403	12.4486	7.92255	11.7319	12.4002	12.2513	19.2587
1439784_at	2310046O06Rik	78323	162.167	146.372	214.795	46.1791	122.642	138.562	104.08	89.6159	85.5678	44.342	34.3307	15.8594	15.6258	19.621	15.7465	8.77847	14.9106	10.0092	9.93339	5.59399
1439793_at	Gja3	14611	49.0326	31.203	54.8218	48.2918	63.5461	34.164	76.3056	66.9974	76.1389	78.8199	37.0493	17.9879	15.4695	17.7826	11.4654	13.4452	9.84476	10.8747	12.6088	20.4246
1439805_at	Nfat5	54446	160.292	195.053	169.139	107.331	268.862	446.222	228.535	161.545	435.961	98.6733	82.8821	84.9382	146.301	74.9313	83.1645	112.635	15.8286	30.1368	16.2081	23.1739
1439806_at	Pogk	71592	32.2808	36.5204	82.8525	55.4235	20.3214	45.0053	62.0844	17.3062	22.9715	28.1299	5.12385	16.9295	17.1729	8.44514	7.74676	16.2531	4.81492	11.6059	8.1242	17.3487
1439830_at	Map3k5	26408	429.089	161.578	165.157	817.99	808.702	333.884	496.178	857.928	584.067	613.463	331.191	579.508	252.084	74.6403	45.4101	64.7509	226.877	139.266	118.549	145.392
1439837_at	Gigyf2	227331	14.2701	10.192	13.6552	15.5492	19.5444	32.7455	25.9209	51.8245	50.2326	21.2048	14.0703	10.0486	9.51557	9.82908	10.4561	8.11903	10.4465	9.82223	9.73585	10.4966
1439871_at	---	---	123.109	106.56	47.3053	151.603	179.013	526.579	251.857	83.907	202.962	94.7258	46.7485	24.835	111.991	47.2482	51.1081	140.862	12.9889	47.2953	29.3691	27.7118
1439937_at	Tm9sf1	74140	23.4023	17.0668	27.5638	17.2517	17.1583	18.0486	17.5696	29.6612	41.3094	32.2004	7.42292	6.6333	6.74357	7.80434	6.94831	7.36558	7.21369	7.07529	7.45359	7.72232
1439945_at	Zfp449	78619	27.5891	12.5632	12.5456	22.579	19.8307	15.9235	16.8783	46.502	58.5651	16.8626	9.27369	27.9266	8.81426	8.16684	9.08672	7.04899	12.636	7.8609	8.53458	8.83839
1439950_at	Dync1h1	13424	47.4801	66.6709	30.8018	67.2794	54.1855	261.195	249.445	44.507	75.3398	42.1401	23.1052	22.2457	22.3819	25.0206	26.0626	28.821	19.2121	22.2007	14.7307	13.4972
1439952_at	Ddx23	74351	31.7408	24.7274	37.8157	18.1949	33.8531	131.288	44.389	26.3273	75.9598	14.6451	13.6869	13.415	32.4978	12.5916	10.3638	18.2862	5.44517	5.19531	5.38976	5.45508
1439960_at	Rpusd2	271842	153.977	85.9359	117.28	59.0872	217.797	97.0721	135.001	168.219	132.605	95.5055	12.3211	58.5793	11.9159	35.7932	29.2215	11.3134	7.26136	5.57623	8.07272	7.79589
1439970_at	---	---	133.812	76.8645	39.065	30.7731	170.469	348.391	76.023	92.394	140.97	21.1434	55.971	34.1024	57.3603	30.3105	32.2554	43.9014	31.4381	28.8783	12.8156	29.7047
1439986_at	Dgki	320127	18.1184	8.65594	9.70827	53.6705	32.2827	12.8614	19.7343	53.2314	46.1647	23.234	9.89399	23.1222	15.7274	9.73517	7.73124	7.78567	7.50176	9.92258	9.91151	7.01022
1439992_at	---	---	15.3428	10.3115	11.5014	47.0004	26.0203	39.3962	66.8229	30.2406	77.4958	55.8027	11.8194	20.578	13.9039	4.22403	6.8853	6.89166	4.79394	3.20106	7.13328	9.25718
1439999_at	---	---	22.2074	69.6039	98.8231	40.4378	14.4883	214.73	49.8143	12.611	17.8078	20.3662	15.2237	12.5183	7.51841	13.8898	12.7397	12.4706	12.8046	12.5559	12.9673	26.7752
1440022_at	Poldip3	73826	127.059	111.926	68.0447	136.325	177.871	416.809	238.724	117.863	149.582	127.927	24.6771	59.8768	44.0887	41.1361	33.8962	40.1683	38.2992	43.9058	37.9909	36.9134
1440047_at	Socs1	12703	39.2517	78.5977	40.5092	117.339	41.0594	161.035	203.702	39.1022	123.754	124.379	54.0166	40.4885	39.2088	31.3856	41.1341	44.6319	40.9493	21.6704	41.0409	66.1322
1440065_at	Polr2j	20022	9.00335	9.79541	7.78161	18.3676	19.665	67.1295	49.6227	9.67311	13.9732	23.7552	8.28798	7.68973	15.9979	8.84518	8.5262	7.75071	4.45833	8.2979	8.9463	8.56766
1440076_at	---	---	53.7516	48.8674	41.8633	150.902	83.2088	202.149	190.9	71.3674	108.099	125.468	61.9089	30.84	21.8716	14.2136	9.83098	13.437	10.3872	13.903	10.4262	11.7879
1440104_at	Ranbp2	19386	42.2531	11.1103	12.5455	6.87314	71.7713	33.6088	11.3626	22.2815	32.9121	8.04489	9.28415	9.56687	14.9452	8.02471	8.92203	10.3973	8.95353	21.0742	8.67574	7.99641
1440125_at	A530054K11Rik	212281	146.825	73.9645	172.688	119.479	140.909	59.5459	144.091	166.858	149.255	125.411	20.9959	80.5044	27.7109	56.1837	45.1315	19.8944	12.733	10.7922	11.1945	11.7245
1440177_at	9630027E11 /// Grik3	14807 /// 329940	153.023	55.9709	175.391	78.5559	242.572	85.6692	207.281	179.06	214.517	175.371	21.9992	44.4831	16.7285	14.5844	12.2983	9.04608	18.6049	11.2837	12.9492	20.5745
1440222_at	---	---	192.535	244.86	75.0907	231.854	251.529	989.463	576.814	217.835	438.338	146.925	275.025	91.283	124.002	15.7674	10.1543	49.1256	76.8846	127.07	81.269	45.0271
1440244_at	Erg	13876	132.129	25.9382	47.6509	360.413	255.854	47.8016	243.589	342.66	289.999	292.222	45.7194	121.602	51.4615	15.0454	12.9472	26.4408	13.2319	10.9974	12.7137	13.242
1440267_at	Pex1	71382	17.7196	37.9956	99.1309	61.1526	24.2759	102.451	89.7354	21.4741	76.7673	35.0329	17.2882	15.4688	38.4896	9.59928	9.65686	19.6574	8.37433	11.8611	10.1951	19.9367
1440275_at	Runx3	12399	523.129	201.349	403.261	282.663	535.418	352.392	546.235	314.621	337.195	341.637	140.929	48.4095	39.5168	46.4589	46.5344	73.8972	116.869	101.876	87.2926	59.5529
1440277_at	AU041474	99229	30.908	57.1772	83.0636	60.974	63.76	156.198	81.7957	29.4946	95.8309	45.2099	11.1618	22.8423	78.598	10.7072	10.4064	18.4244	10.2206	9.52235	11.3342	37.9195
1440328_at	Nasp	50927	59.99	85.7757	48.7449	39.9325	68.6158	322.639	94.8288	44.6165	39.3124	43.7696	45.3701	32.5523	58.8394	43.5725	42.4621	139.792	18.5386	36.0645	35.3214	18.0437
1440346_at	Kdm6b	216850	245.585	242.911	69.4802	101.384	284.252	420.199	142.499	232.987	42.8928	62.9305	156.897	64.4836	27.095	37.516	27.5188	5.44118	36.9224	86.5538	29.0831	18.9718
1440381_at	2410085M17Rik	73706	80.2202	33.2544	39.5806	52.5521	73.6451	27.0676	30.7071	101.709	76.112	59.7957	10.8771	80.8344	27.5693	36.3503	24.3887	11.5634	22.9818	6.92177	7.46174	10.3955
1440400_at	Rnf157	217340	155.887	184.233	283.691	194.318	190.611	454.936	233.871	130.813	217.126	168.989	46.9986	28.4425	14.3891	6.65255	6.6302	6.32649	6.56583	6.3953	6.71044	8.22174
1440457_at	---	---	10.6629	9.99447	32.1539	13.5912	26.8692	45.2886	29.6798	10.5789	28.8428	20.8631	10.1475	10.394	12.6214	10.8133	9.51029	10.6364	9.51009	10.5245	9.55457	19.5653
1440461_at	---	---	409.115	256.079	58.4347	125.273	494.772	633.419	215.971	321.189	354.628	59.9486	124.369	141.563	160.853	141.368	78.121	113.365	40.5712	59.1992	33.038	61.874
1440464_at	Elavl1	15568	26.033	10.8339	16.9159	9.07999	40.5377	71.2313	23.6566	17.8767	59.2484	9.86014	13.4002	9.96462	44.5215	11.8681	9.97448	38.1722	7.31714	15.2172	10.1198	8.81594
1440522_at	ENSMUSG00000073019	331484	50.7351	24.1168	83.4138	12.2635	13.0703	19.7187	14.196	18.002	24.9456	8.76314	7.10623	8.73811	8.77734	5.52721	6.66913	5.98567	5.7288	6.55948	6.74297	6.58308
1440530_at	AU019752	101756	52.9151	24.6985	76.1961	60.9491	47.6684	114.361	139.931	24.7966	49.8091	74.3964	23.5947	9.54652	14.1062	14.3268	15.3461	7.23558	15.2942	14.6641	7.15125	24.7745
1440553_at	Mecr	26922	53.0374	68.7145	79.7278	98.7914	52.8051	254.644	218.136	50.2261	125.195	46.1437	33.1924	12.3289	37.329	6.63132	10.685	12.501	12.4963	42.5877	6.70687	23.9484
1440596_at	Cabin1	104248	18.221	31.7446	17.5315	26.6177	27.5733	97.1737	65.424	15.9061	25.0752	14.9937	16.7508	9.37748	33.0487	12.722	6.83866	31.2522	14.4459	21.3367	12.7736	36.6461
1440641_at	Vps29	56433	50.2116	50.5415	51.5056	44.915	68.1922	143.154	68.1339	32.2387	87.1666	16.0336	32.1959	23.1699	31.1675	18.6658	8.03981	19.0557	8.00511	7.95655	15.1446	20.7095
1440681_at	Chrna7	11441	42.1688	35.2582	66.8705	43.1207	66.2618	40.4656	65.0921	47.6828	28.3459	27.9445	13.1724	6.93313	7.39427	5.65871	4.92621	7.77269	4.92234	4.87103	7.22964	5.94676
1440688_at	Arhgap26	71302	89.3924	138.622	59.6663	20.9127	39.3809	35.0372	29.8436	34.2623	31.42	24.3896	5.68589	21.6712	7.84667	15.4187	14.7892	8.63996	29.3934	14.602	25.4141	21.8998
1440692_at	Gm364	245423	2834.84	3356.57	3629.69	1382.96	2496.41	4675.95	2662.46	1861.34	4040.19	1523.5	3327.94	350.861	488.148	84.6923	78.8538	90.3432	187.57	418.01	319.794	170.833
1440745_at	Prdm16	70673	152.516	73.3798	109.535	80.0749	170.698	144.739	116.713	126.718	110.643	49.4895	27.6936	45.9722	23.0745	10.2903	8.66965	10.8683	14.147	7.43422	10.3572	10.1412
1440789_at	Neo1	18007	93.3649	22.0411	37.8055	15.0844	122.421	177.387	20.4715	79.7581	43.4263	15.4192	21.9906	17.8632	16.2548	13.0142	14.5626	11.2116	16.0161	13.674	15.8072	20.7619
1440804_at	Nktr	18087	148.34	171.906	13.921	38.0596	184.725	374.69	54.1962	118.389	85.3975	8.25469	75.4232	48.3302	43.9126	44.5883	44.5154	42.9093	18.9706	49.1485	13.0067	8.64846
1440847_at	Mtss1	211401	58.8059	42.1931	46.7266	27.6047	65.1712	68.3933	98.3798	33.9594	17.8774	39.7906	12.7564	10.4687	7.46767	6.35079	8.00056	7.67828	6.2368	6.16561	8.09199	8.17111
1440858_at	Crkrs	69131	410.74	203.665	338.093	374.14	740.394	593.7	626.011	579.079	552.681	538.654	155.541	266.11	157.136	181.175	158.632	83.9455	99.4093	72.7161	65.8901	50.4003
1440868_at	Gabpb2	213054	103.329	73.0154	45.0252	79.1009	103.787	91.8219	136.651	83.5764	54.1533	20.138	21.049	9.98506	8.93755	20.4144	7.6464	13.4494	5.98486	7.0826	6.98984	9.93039
1440870_at	Prdm16	70673	92.7818	56.2876	162.083	92.1489	111.112	110.918	129.232	74.7934	82.6299	70.3103	7.78845	26.8644	7.51938	6.78327	7.49904	10.7838	6.67604	6.65108	5.81863	6.90734
1440881_at	Brwd3	382236	156.244	88.8141	99.8488	275.647	294.135	93.6178	267.261	278.678	262.616	205.088	36.3425	193.027	90.2051	90.8247	89.7819	85.6571	114.425	88.7615	74.4447	97.7873
1440892_at	---	---	63.1503	51.0612	74.353	43.0759	122.607	176.904	61.7379	53.9242	96.3689	32.6253	13.2135	21.993	48.0974	4.70767	7.86236	21.1823	9.38636	6.00153	7.74425	7.91811
1440896_at	---	---	32.9456	13.7922	43.4249	26.7493	72.1556	66.7423	24.6428	64.8593	110.757	28.3242	14.0766	16.0109	15.3593	13.7164	17.2773	8.69094	10.4843	7.09546	8.92791	8.63246
1440910_at	C77370	245555	188.502	150.971	336.616	94.9249	192.074	222.66	237.525	95.3821	152.371	123.569	26.4515	5.48901	5.87568	5.63632	5.55497	5.05148	5.73206	5.54707	5.75224	5.89567
1440924_at	Kif20b	240641	318.338	149.1	38.3251	174.343	406.543	266.691	612.19	376.182	126.846	71.9645	127.046	76.1535	71.4351	164.632	79.8531	58.8301	29.3424	219.019	44.6775	138.708
1440935_at	---	---	39.3154	32.8719	47.3685	42.6137	86.3678	130.669	55.9014	65.5853	88.3352	49.6095	23.0917	18.3441	21.6219	13.8992	7.01979	14.1389	6.89056	5.75909	9.10308	29.271
1440960_at	---	---	43.6032	26.5895	23.721	66.6365	66.0419	73.7966	86.8239	61.2712	67.5085	44.4319	27.6749	21.7602	25.8269	6.3229	10.9222	22.0082	10.762	17.4412	5.26124	30.0894
1440972_at	Nsd1	18193	127.266	98.2024	113.19	181.717	132.202	192.159	261.547	119.903	114.853	71.2853	42.585	57.9941	28.5112	30.9728	18.9209	7.77558	8.04658	7.5694	12.1572	10.596
1440990_at	Kif26b	269152	22.8448	15.2082	8.41426	61.1744	70.8178	13.4978	56.5965	71.6647	63.7434	58.1419	8.42675	14.9766	16.5217	8.59788	8.26826	7.82531	10.376	7.65046	9.09519	7.75461
1441029_at	---	---	10.4866	7.061	38.2978	11.2678	21.521	25.923	45.1363	13.0481	30.4368	7.30672	7.32286	8.44586	7.7541	7.8051	7.58584	8.90161	7.35863	5.51656	9.28872	9.14083
1441050_at	---	---	48.4769	39.9184	26.6342	9.84526	101.056	176.604	32.2343	43.8085	67.0158	7.84816	25.4959	28.2956	32.9317	15.7394	20.6148	29.8861	12.3942	14.1343	14.5811	26.9388
1441052_at	---	---	82.6834	40.3033	40.5132	9.33147	132.418	146.653	43.2046	47.3228	71.7561	14.7481	30.5588	5.94563	16.0888	5.89722	6.19979	13.0412	5.14291	5.12258	5.83567	5.9222
1441072_at	---	---	45.009	54.8305	61.8348	42.7359	101.76	277.093	79.5096	77.084	190.152	46.9898	42.4578	33.4046	56.4236	5.85734	7.23628	6.8053	7.21202	5.73775	7.04124	18.0215
1441089_at	Eif2c3	214150	149.921	77.7989	125.417	76.0346	189.546	165.902	199.958	184.695	115.204	92.8401	60.6276	50.6107	37.0737	38.5995	50.9074	20.0927	25.1279	24.8649	26.592	19.9415
1441114_at	9330156P08Rik	320141	45.7611	36.6519	22.416	13.2283	63.8597	119.256	18.5857	35.5632	32.3532	16.9398	24.069	19.5062	18.1936	17.1508	12.1124	17.7819	17.6523	15.9209	13.0819	13.9274
1441138_at	Foxn2	14236	26.7223	13.7027	13.3551	11.4735	90.815	48.4895	17.0369	27.9488	13.802	12.1966	18.6973	13.4188	11.2441	13.9909	14.1954	12.1374	13.7662	13.6718	15.8205	22.3245
1441161_at	B230216G23Rik	319552	50.4096	70.8104	164.729	29.024	14.8251	76.7208	40.73	10.1267	20.792	21.6122	16.5535	13.9215	7.78645	7.82925	7.57076	7.2017	7.54903	15.2037	9.68665	12.1037
1441231_at	100042016	100042016	154.981	203.444	154.181	97.7862	280.69	868.548	198.879	214.09	301.937	70.0412	224.055	66.7549	87.5002	13.2643	18.6918	48.7724	15.5073	11.8551	8.08294	13.2419
1441268_at	---	---	41.9709	117.281	133.012	165.737	62.26	163.331	186.795	57.6454	233.693	200.184	66.2888	23.9817	34.8644	7.80619	7.78495	24.7689	7.13202	7.85388	7.82247	16.2129
1441272_at	Matr3	17184	9.9052	6.55225	6.1259	22.4636	29.9552	44.9029	55.2756	36.5188	41.5641	33.4115	6.6139	7.43472	5.84303	4.2352	4.20993	4.11052	4.2502	4.18403	4.25122	4.21981
1441274_at	---	---	80.8031	106.013	92.4414	103.118	126.665	296.119	181.608	75.3855	95.7992	64.7539	40.7805	42.1095	47.9223	33.9117	34.7342	58.9745	15.8183	22.6189	6.06754	32.4002
1441275_at	Kbtbd8	243574	47.5941	15.7855	39.4402	33.0538	52.2926	39.8127	43.2615	35.362	18.5729	35.6435	6.23242	10.0134	7.51474	9.18358	5.58871	3.83086	4.40238	4.29904	4.58415	4.40185
1441297_at	---	---	12.7026	15.2519	30.8542	69.7478	23.0776	96.5169	99.9446	12.7989	41.2625	44.911	12.4206	6.71618	14.7691	6.62129	6.49909	6.94294	6.62295	6.60425	6.91165	16.9804
1441347_at	---	---	13.0595	20.0741	22.3225	16.6271	18.8272	73.116	45.7952	12.1175	32.219	17.6322	10.0749	12.3741	12.0861	12.275	12.19	12.4997	12.9204	12.1117	12.8675	12.5512
1441360_at	---	---	24.6736	37.7543	67.3153	22.8565	34.5884	144.903	75.895	16.0304	25.678	20.6077	8.81844	9.64916	8.17111	8.10186	7.98024	7.78095	8.0496	8.22832	8.52415	10.7209
1441435_at	---	---	111.218	131.174	69.0852	65.8459	194.133	377.708	170.466	99.1614	146.58	99.6392	27.1448	35.7623	32.694	39.4979	61.4259	36.2415	56.0877	39.0604	23.9462	22.9634
1441442_at	---	---	18.5364	73.2935	70.0694	16.2251	28.4182	186.736	42.7129	16.2959	33.3319	18.6761	24.3998	16.11	35.7237	14.7808	14.6638	14.9152	14.5922	14.1752	17.502	15.7099
1441465_at	Cnot3	232791	20.193	28.6597	61.4126	29.5584	61.1632	190.133	67.3031	24.9116	95.9575	30.9467	25.3027	9.49113	57.0533	8.1845	7.79401	21.802	6.50558	7.85385	7.92659	8.10169
1441477_at	Calu	12321	118.74	164.58	229.922	286.417	174.618	590.507	481.01	124.224	280.462	241.907	56.5018	50.6147	73.9376	12.3249	12.1473	33.9469	11.1966	11.1677	11.383	28.44
1441530_at	---	---	27.8407	39.0055	15.0657	20.5783	42.4723	217.183	43.3154	35.4278	24.6686	10.4842	12.1265	12.042	9.73016	10.1762	9.9384	10.0961	9.86804	10.2705	10.3419	10.3685
1441544_at	---	---	46.4468	94.505	101.881	84.6574	91.61	368.702	178.44	41.786	157.484	74.6839	15.0968	10.7227	78.9477	5.75556	5.55082	14.6408	4.09055	4.89227	4.19552	2.97881
1441549_at	Pi4kb	107650	20.5806	23.0022	45.3702	22.5968	37.7364	114.562	56.3617	19.1119	65.2892	34.0518	11.7545	14.157	43.263	9.86182	9.76643	23.3764	4.1826	5.55354	6.02948	2.93071
1441679_at	---	---	195.756	172.541	102.588	53.9212	375.209	535.074	104.601	180.409	174.986	58.1827	58.2186	30.8866	18.0533	21.2452	18.7069	16.9414	25.1631	15.1258	19.6649	9.47996
1441684_at	Ttc3	22129	134.258	40.472	104.835	22.8896	150.315	185.539	35.3974	80.4186	48.1427	13.1666	30.1817	35.4479	26.6606	10.5191	14.9047	10.1356	10.4435	10.3536	10.5534	18.5067
1441688_at	6430537I21Rik	319654	40.9568	34.6047	11.6666	17.5592	44.5952	142.361	36.4142	32.3211	85.0073	12.9342	21.4616	10.2923	63.8912	19.865	10.7153	36.1109	5.80841	13.6051	7.68054	5.80411
1441698_at	---	---	13.8929	9.88633	6.80636	18.483	21.6596	45.7968	25.3566	19.0398	6.88214	7.43773	7.79859	7.62792	7.37076	7.72874	7.56717	7.1243	6.55516	4.99321	7.79818	7.69089
1441722_at	---	---	188.949	221.441	225.495	136.599	396.159	599.329	257.811	280.313	239.581	142.698	136.453	112.785	134.235	76.6168	33.2776	47.1469	25.7726	44.0713	36.8805	57.1538
1441724_at	Stag1	20842	36.178	24.8594	64.7027	18.0249	72.0651	100.229	48.9083	31.7454	31.5475	31.6794	16.3912	10.5061	14.7018	8.19922	6.52243	7.95149	8.09996	8.10909	9.89428	17.3025
1441771_at	---	---	50.4765	19.8116	9.40329	8.24828	106.952	71.0455	8.8174	27.6303	17.4734	9.42463	14.1693	8.94393	8.38673	8.91732	8.90084	8.42161	8.87631	8.82248	8.91771	10.2929
1441779_at	9530006C21Rik	77393	20.8509	18.4677	24.0464	40.1656	40.7104	28.1638	47.9512	63.6036	112.833	58.0846	28.3773	67.455	21.3736	20.7965	29.5976	17.2676	30.5203	18.4344	19.6485	19.0937
1441793_at	Rnf39	386454	13.8596	10.442	12.9429	36.1285	53.5577	20.4432	23.6844	63.1449	24.9347	20.0163	17.9672	22.3224	13.1188	12.4925	13.1934	7.71642	8.40466	8.25803	7.93424	12.2472
1441799_at	6030422H21Rik	402765	46.3847	36.4349	71.6501	26.175	128.635	84.0488	33.2119	56.8432	47.0356	24.6565	29.0111	18.2916	11.7145	12.0498	15.2661	11.0016	11.218	10.3183	11.8146	15.3245
1441869_x_at	---	---	151.615	111.811	40.8881	29.6339	156.277	353.28	60.9505	111.939	91.0721	19.5539	22.6743	23.2816	14.9567	15.6001	10.6338	17.568	15.3071	10.1077	11.515	15.3459
1441906_x_at	Syap1	67043	74.6683	64.2619	70.2775	20.5231	60.0043	28.4794	24.2728	63.1564	19.0156	15.1762	14.7898	14.8874	4.96121	4.55107	5.91569	4.37877	8.24213	4.47604	4.56442	4.5514
1441927_at	Syt7	54525	141.52	108.233	125.655	23.5656	103.869	113.326	50.523	58.9404	52.7173	28.6846	28.4928	25.7639	10.6839	23.5955	31.2485	6.82231	31.1213	21.1351	9.81759	6.4741
1441963_at	RP23-100C5.8	241638	219.298	173.06	237.158	80.9547	216.142	270.915	199.156	142.6	140.856	113.297	11.1694	22.4204	11.941	5.39008	8.32859	9.99858	5.33757	5.62523	5.63777	10.7823
1441980_at	C030007I09Rik	109250	61.4932	37.0906	43.9332	20.7958	69.1642	36.5639	42.82	58.6802	42.2515	24.3267	13.7506	14.2689	8.66541	9.60352	12.5561	4.54456	5.1198	5.13326	4.74612	7.38918
1441984_at	Clspn	269582	451.718	198.732	63.6258	295.565	529.433	286.675	467.919	315.235	118.03	76.5113	52.8662	81.3229	19.3103	21.2838	21.118	19.2119	20.341	21.3414	10.1967	14.7252
1441992_at	Rab14	68365	174.853	96.4956	28.0123	41.1537	173.369	258.216	52.9133	140.308	114.283	31.1297	40.1084	39.3955	65.4345	39.7223	28.3577	29.4261	28.2686	27.7892	29.163	39.1295
1442014_at	---	---	128.07	101.187	17.3171	25.2926	144.413	218.045	27.6448	132.243	58.0607	11.8586	68.3853	24.0183	13.2399	12.5117	10.4613	11.9035	42.0425	75.8269	29.1083	9.00069
1442018_at	Btg1	12226	19.2714	9.70153	6.2385	34.2769	23.3919	24.6046	50.0194	12.4199	8.13441	20.8966	5.05758	5.5576	5.28772	4.64384	4.47266	17.8184	7.25864	15.6742	7.18255	7.9171
1442026_at	---	---	140.262	55.0686	92.5493	138.801	186.609	63.0435	100.446	179.531	130.24	116.614	27.9209	107.483	47.2276	12.6333	7.61883	7.74663	8.80984	7.95564	11.37	8.78897
1442046_at	Shroom2	110380	29.6469	44.0991	70.5919	34.6621	43.163	27.1903	46.1089	10.3972	32.8504	37.9968	6.13685	5.26142	5.13601	6.05604	5.38039	6.36853	6.83987	4.90939	7.13147	5.32829
1442047_at	Rreb1	68750	76.8544	41.4831	70.1024	31.4933	116.177	93.022	96.4513	49.1327	53.6576	53.1411	32.5945	24.3903	18.0012	19.3804	21.4665	9.87069	20.6955	21.3128	13.6667	10.2337
1442054_at	---	---	79.5957	59.9565	36.1079	96.8418	111.669	204.217	160.403	58.9303	133.606	35.1698	51.4031	18.5284	76.6945	11.3745	7.43602	25.9937	8.77129	5.04944	13.7485	22.5299
1442095_at	Asxl3	211961	19.718	16.5175	39.002	50.4343	50.2921	53.0951	47.983	37.486	41.2194	28.2244	7.69306	15.4481	15.0226	12.2058	7.2357	6.47576	9.79832	8.77686	10.5849	10.1676
1442100_at	Inpp5f	101490	69.0192	28.1717	20.9904	41.4922	76.3175	50.8196	23.0166	63.2766	33.7351	9.4831	9.36199	11.4267	7.05219	9.30113	7.59071	7.16946	9.12667	7.48488	7.8245	9.12284
1442102_at	---	---	34.7955	20.0753	16.395	12.7064	42.4963	46.6221	29.9381	29.7168	14.4489	15.8403	6.25149	9.77747	14.0461	11.522	7.56133	9.54213	6.14034	5.82372	8.6517	14.0183
1442109_at	---	---	140.096	82.589	50.6752	25.4921	198.169	306.785	88.0098	161.043	116.498	17.3191	46.6623	39.2618	40.9723	35.6231	31.8289	25.1184	37.9933	18.5008	19.716	19.694
1442112_at	Vps18	228545	47.8411	41.807	28.6518	20.343	57.9122	110.444	56.2925	48.9978	41.3165	14.4835	19.156	14.5111	15.7251	13.7637	21.9554	11.414	14.4989	10.5407	11.3599	11.8781
1442142_at	2700050L05Rik	214764	200.674	231.996	137.592	182.199	223.151	289.037	389.852	206.231	221.315	70.8112	59.8105	24.236	42.9244	17.0451	10.2913	7.80606	27.7931	71.4094	28.8943	47.3695
1442145_at	Atp13a3	224088	1435.55	2181.34	2749.09	1211.8	1023.3	2101.45	1740.12	739.188	1344.8	1032.83	621.176	253.512	310.757	141.306	144.745	252.255	359.832	408.931	445.81	346.932
1442150_at	---	---	18.4816	41.9213	86.5525	87.2965	42.9944	162.563	115.059	35.7225	58.803	67.754	32.8027	16.3785	28.1037	14.2777	10.6822	13.5307	4.21057	5.16736	7.33691	5.28819
1442178_at	---	---	21.2172	17.565	16.9826	7.13829	24.5508	178.753	9.64228	10.9384	35.2866	7.33294	9.17189	7.37347	7.3929	6.62099	3.21816	7.24543	7.41481	6.5409	5.54942	8.44455
1442222_at	Ifnar1	15975	71.6651	108.3	32.164	78.5496	95.6947	200.881	111.729	65.3003	63.1253	31.4157	47.5952	29.1106	19.4436	14.0983	11.5078	25.7081	10.3359	10.2644	10.601	17.8003
1442281_at	---	---	65.0107	53.2839	127.684	62.5217	67.4195	96.5988	85.6611	37.7337	74.6274	45.1132	16.6262	19.8651	22.9589	15.0027	15.679	15.8675	15.6338	12.6795	14.0048	13.5369
1442302_at	Mpg	268395	50.6561	63.6116	39.615	56.8062	56.8863	88.283	94.2214	22.9064	77.7864	43.8039	9.98148	19.5382	23.4389	7.77853	4.83785	6.32494	8.80442	4.72559	5.34771	6.19439
1442325_at	Tbc1d24	224617	90.4452	109.651	131.231	72.0551	109.428	155.579	152.034	108.894	104.994	77.0866	15.1295	17.6945	12.5655	15.6613	15.4907	8.87771	12.8507	11.808	14.1316	11.5294
1442358_at	AA409587	101447	142.716	228.241	237.537	176.055	224.63	778.253	360.412	124.382	498.827	106.47	184.866	50.1201	198.271	16.6254	7.36096	31.6432	5.86298	5.75676	5.84952	11.0445
1442365_at	---	---	33.3032	30.422	80.5271	19.2908	37.1383	150.717	38.7713	19.1242	59.1785	22.5933	18.5351	13.8378	17.5681	10.9031	7.50962	15.6878	6.60062	15.8009	9.03435	8.83666
1442447_at	---	---	37.8811	51.0994	29.8328	16.776	70.2229	281.344	36.549	45.5941	105.155	20.8428	48.1115	24.6749	46.5022	6.8008	6.84279	9.48614	6.67243	6.58367	6.88634	6.99939
1442454_at	Top2a	21973	359.062	299.192	275.605	217.101	563.098	914.796	567.242	394.923	347.343	163.289	239.112	149.612	184.748	156.146	128.615	174.237	68.7844	155.973	138.431	237.704
1442494_at	C79242	98068	34.841	8.10895	19.7723	9.7376	35.859	35.2688	26.0122	17.4774	38.4586	14.1402	8.25927	7.84489	7.31005	6.63506	6.54174	6.98969	6.85539	6.45347	6.74019	7.40484
1442497_at	Smchd1	74355	28.7795	32.0498	33.2594	57.6854	39.726	80.6588	135.276	28.7502	65.4639	25.4914	15.1079	10.8177	18.9723	14.2769	12.4624	18.1924	12.3887	10.832	11.1652	30.2567
1442513_at	BC016423	105203	46.1625	67.0363	23.2814	47.9131	86.3316	245.484	89.7246	60.1819	63.9483	41.7521	45.081	27.1376	12.206	6.83441	6.757	14.4549	43.5975	49.8416	25.5094	14.0879
1442535_at	---	---	52.0597	84.3061	136.025	35.971	92.7868	466.449	99.1085	58.1195	267.404	64.0522	52.7053	49.7934	237.023	31.5167	40.8861	199.251	6.67797	25.5096	19.8835	23.5733
1442569_at	---	---	93.203	89.9019	82.6664	74.2863	87.7246	193.361	127.926	61.9351	49.9364	35.2892	69.8977	23.9748	45.0635	35.7783	27.5971	34.7674	20.8927	28.5962	24.5808	39.6915
1442599_at	Slc12a9	83704	91.401	43.8936	79.0757	114.422	118.039	162.281	178.206	87.8173	180.447	79.6284	15.4828	13.3349	23.8356	12.7231	13.2073	12.2184	13.3511	10.346	15.5964	15.8315
1442603_at	---	---	32.574	20.1608	10.8142	9.28572	59.2914	47.9682	23.2874	22.7295	30.5586	11.3844	11.8905	10.802	13.9917	15.2042	11.0851	10.4342	10.581	10.9341	11.5197	11.0595
1442625_at	---	---	39.7698	29.8184	44.8794	48.8802	50.1589	178.648	110.366	31.2083	69.4491	53.47	18.0516	17.0802	17.0047	16.0011	15.7589	14.6741	13.6146	14.1471	16.3488	17.9969
1442626_at	---	---	39.7525	11.7833	18.8063	20.2971	53.8528	50.5715	55.953	20.9583	52.1363	18.4026	12.5668	8.74426	42.5255	9.0687	10.8821	30.2075	4.34106	8.05155	6.43458	13.2715
1442632_at	---	---	46.6064	50.3601	32.2708	18.5775	55.0477	161.797	31.438	18.4092	50.9874	23.2921	9.92992	12.4151	7.16231	8.64963	7.13052	6.9853	7.09191	5.73744	7.41029	8.56757
1442641_at	---	---	40.5632	17.3801	9.19888	11.8346	77.2495	116.423	27.609	39.8412	37.5803	11.7447	13.5124	6.76586	7.16473	5.71943	5.6586	5.2345	6.87234	5.62327	5.75148	6.16292
1442655_at	Dnmt3b	13436	19.5854	39.1432	16.4204	51.2691	62.4198	139.642	50.8653	40.6354	58.4767	28.9598	15.5245	14.2906	15.1281	9.62485	14.7779	11.3529	9.62855	10.0186	15.4211	15.1654
1442679_at	---	---	48.0946	43.7581	38.837	63.4398	118.616	179.071	60.3499	58.1983	90.6903	47.7591	42.0824	16.1582	23.2714	9.97729	9.63359	8.35171	9.73085	6.44583	12.1603	26.5591
1442710_at	---	---	191.397	113.325	81.2624	185.968	279.144	694.877	200.165	246.136	279.465	160.207	103.807	104.177	41.7236	13.2035	16.519	13.6947	30.0037	30.4709	23.2315	54.4085
1442760_x_at	---	---	157.955	183.946	58.4389	53.9412	250.254	516.289	105.332	160.446	135.977	48.2217	183.04	70.3166	39.1157	51.1511	14.9119	12.5582	9.77201	11.9544	10.1605	10.2137
1442811_at	Rgmb	68799	29.5161	13.3026	19.607	25.4006	40.0876	41.5264	47.3695	26.7445	33.3703	25.1512	11.478	13.9822	9.21472	9.96625	13.2738	8.59294	9.84866	8.98854	10.4227	13.8782
1442865_at	Dgkk	331374	61.4245	13.0046	34.6353	40.841	43.9938	11.0564	21.7703	46.783	27.6591	22.188	7.8385	23.0054	9.79913	9.20341	5.25614	7.00672	4.68387	4.68501	4.755	4.24019
1442867_at	---	---	9.57517	19.4952	6.95689	10.4706	16.0908	77.0904	36.8668	4.81851	12.4339	4.58128	4.8727	4.6355	4.73224	4.81676	4.75065	4.62089	4.74344	4.69031	4.72973	4.73258
1443003_at	---	---	40.1817	15.171	17.2033	10.5226	45.1928	51.5035	33.2779	10.2261	23.5173	7.78943	9.06999	7.51634	7.40515	7.96831	7.82622	7.15798	7.95411	8.61623	9.22462	19.7715
1443070_at	---	---	62.588	115.803	30.9384	36.9208	122.867	361.88	58.8025	86.5199	75.551	30.8113	27.6649	35.4426	22.0168	10.9434	11.6092	15.7903	18.5908	10.7718	11.6369	27.339
1443086_at	Alcam	11658	8.34851	8.72897	6.9614	20.4056	12.3578	64.0754	39.6555	7.07795	10.4578	7.0071	8.01091	6.99801	7.02277	7.50726	7.40716	6.81864	7.23991	7.06196	7.63076	7.56128
1443134_at	---	---	8.8336	8.8211	15.0843	16.1754	8.97008	15.5043	26.8822	20.6453	18.2619	29.1661	9.20996	8.63918	8.84637	9.02697	8.93795	8.49375	8.868	8.80704	9.1282	8.31435
1443172_at	Orc1l	18392	62.8249	44.0562	58.6227	50.8232	82.9749	170.534	55.4926	64.5016	65.6249	26.3328	25.552	22.4456	29.4848	18.7759	18.59	21.4543	21.2651	15.2364	21.828	21.2342
1443212_at	---	---	52.7783	59.7163	17.8155	32.9107	74.5515	249.074	60.1437	47.0595	28.1314	17.1816	20.7967	9.8565	13.3438	7.88209	8.86893	9.14936	7.82302	6.6664	10.1858	9.6329
1443231_at	---	---	50.9275	59.8294	51.4557	31.4924	53.5791	378.1	54.9805	32.7374	102.259	30.4572	40.5607	28.9437	17.1406	7.99093	18.8675	18.3483	22.9191	18.7001	25.8261	25.2005
1443241_at	---	---	100.826	21.3327	16.2132	67.3906	183.305	161.12	76.3405	118.037	61.8699	32.2589	29.6714	15.7353	14.1032	9.9445	9.7801	13.6259	9.76054	9.58239	15.2298	24.9248
1443248_at	Tmco3	234076	35.7932	36.5433	57.2918	30.91	70.3045	125.501	69.2171	36.1782	45.3372	36.2157	18.3061	21.4365	30.2638	25.358	19.6256	22.2173	17.5503	14.0604	16.7	19.4162
1443293_at	---	---	67.9269	25.2871	22.6456	26.8993	69.5068	121.68	56.6369	42.7874	45.2827	19.6018	8.93779	12.5974	22.9412	13.6705	5.92275	8.43151	9.71224	22.8556	9.75933	9.07068
1443311_at	Thap4	67026	140.73	79.4645	137.018	207.588	194.518	139.149	192.525	222.616	219.794	162.418	45.9679	98.4425	22.6993	9.42578	10.6493	8.72623	43.8871	10.4733	11.3816	7.76998
1443340_at	Cbara1	216001	9.47113	10.7232	11.9357	31.9285	15.2385	27.8299	48.1183	11.8111	56.3269	28.5037	14.2128	10.0398	22.6191	9.62537	8.45724	10.8859	10.1206	8.82948	11.5783	12.3979
1443383_at	---	---	46.4984	96.348	114.497	22.9354	78.0045	162.662	56.4691	44.5443	77.97	16.3369	25.1462	19.1608	12.8476	12.6531	12.9964	10.8453	13.1409	13.5094	13.9411	23.141
1443399_at	AU021001	99801	33.272	25.0431	81.3086	15.7445	45.9717	152.662	53.1839	27.5023	47.2603	14.4695	49.6592	10.2899	13.1527	10.7142	10.7192	8.96887	8.14463	13.4101	11.4537	13.9271
1443436_at	---	---	65.0529	84.5905	78.0419	76.1767	85.9195	206.211	156.892	50.2996	125.367	88.3936	46.5027	38.433	20.7462	16.9593	20.7318	16.5182	12.9684	20.3201	12.3491	20.8243
1443445_at	---	---	16.4456	14.5779	16.2255	13.6575	34.1593	78.3074	30.0875	20.0971	34.391	13.9551	14.4371	12.9828	12.0838	12.9172	12.808	8.71267	14.9592	12.396	13.7987	13.9728
1443512_at	---	---	31.3302	10.9988	22.528	19.1463	89.9564	84.7082	22.5018	49.5261	59.4492	10.658	11.1623	17.6624	35.3974	11.1404	12.2632	17.3498	11.7691	14.9283	5.64029	15.5045
1443513_at	---	---	288.71	284.971	343.971	160.157	339.127	763.394	373.984	186.629	227.105	232.054	118.3	92.0792	137.682	95.9263	76.7225	166.095	54.0252	73.6835	59.0808	56.3728
1443533_at	---	---	50.1495	92.0382	59.4521	48.5293	78.2699	559.284	93.631	43.4399	211.286	55.7233	106.977	45.7319	115.06	15.2029	8.67916	50.4464	8.82731	14.7849	22.9609	25.9203
1443554_at	Ssbp3	72475	159.744	131.542	80.1103	109.686	209.921	310.997	221.456	165.038	214.413	132.61	40.8481	52.9541	48.8385	39.5304	24.9108	14.5973	19.947	16.6963	40.682	32.7135
1443592_at	---	---	164.137	140.558	175.767	129.061	254.019	464.977	328.258	90.2203	233.53	139.572	73.0009	33.709	81.2351	43.4151	19.1079	74.8813	17.7193	26.3543	44.5124	28.9574
1443603_at	---	---	10.4578	33.963	17.6238	21.3825	17.5818	54.6832	20.7798	12.7615	18.3614	12.1269	8.52637	7.26818	7.32299	7.75961	7.62563	6.89526	7.0365	6.21594	7.99313	8.93176
1443628_at	---	---	33.1653	26.9264	32.4926	16.4049	28.6443	145.89	42.6743	11.1856	21.0064	14.9119	18.1055	9.76598	12.6082	8.65658	8.21989	7.62004	8.55241	11.071	8.55147	11.5409
1443632_at	Obscn	380698	112.351	88.3037	161.513	136.891	234.897	256.348	402.922	221.032	311.197	361.881	48.0372	52.7319	41.9456	41.3856	38.0008	35.7589	39.6271	35.4818	12.5351	11.9014
1443654_at	Ankfy1	11736	36.8818	18.416	22.5537	20.4881	65.9573	112.716	51.1531	42.7388	54.1487	13.5131	17.6876	16.7794	18.1457	12.801	12.9955	11.3273	9.67941	11.5466	14.0239	12.0289
1443669_at	---	---	36.0033	25.1719	21.6082	48.6482	63.8223	41.4026	135.917	115.394	128.836	90.4285	19.9125	42.0585	21.2167	19.7511	18.9789	19.3107	19.5562	27.1017	20.3465	19.3837
1443729_at	Mtss1	211401	119.065	28.048	88.4804	23.3115	133.168	143.973	50.2898	99.9377	40.7871	25.0132	26.8273	21.894	14.4872	16.4632	16.4406	15.1929	16.3698	12.3805	16.5314	16.3297
1443765_at	1810058N05Rik	69808	48.4483	18.1799	26.9609	40.9243	35.569	23.7391	28.4248	40.2976	20.4212	25.9144	42.6486	13.1733	10.6272	12.3022	4.69502	10.4419	4.8661	4.62813	4.84746	10.6992
1443768_at	Rhoa	11848	35.847	7.69726	5.84996	16.837	21.7032	50.0724	34.5045	22.7314	9.39865	6.06978	6.46021	5.8998	5.77595	6.13374	6.00911	6.1731	6.00797	5.8734	6.09821	6.50282
1443807_x_at	Ccnf	12449	68.1357	31.07	37.9097	38.2809	140.382	61.4559	105.563	163.709	97.2833	117.496	44.3866	27.2857	26.9617	26.9535	14.0044	19.3499	44.2931	53.7769	44.4116	38.9683
1443858_at	9230105E10Rik	319236	68.5744	24.2999	23.9195	59.624	80.3481	20.9684	23.1844	91.5236	58.0277	89.3473	17.697	74.054	24.2124	21.3635	18.2259	11.1047	25.3005	10.8339	11.9357	11.7049
1443868_at	Atp13a3	224088	63.5362	83.6484	71.0229	36.658	51.2697	55.6239	52.2951	35.6781	24.5044	34.7374	16.7349	16.025	10.0356	14.1729	13.8593	8.62699	24.6047	22.6504	23.8387	14.0153
1443870_at	Abcc4	239273	686.418	263.976	496.025	826.23	1065.72	466.419	706.928	903.711	746.459	563.693	286.362	311.935	163.654	47.4939	18.5666	26.3552	47.2882	8.89844	12.5498	38.5089
1443877_a_at	Rapgef6	192786	361.267	93.4133	64.4645	200.991	406.736	195.553	475.894	451.148	149.984	53.5979	65.745	125.092	97.4139	176.682	111.815	55.899	80.2766	92.433	26.0572	97.6613
1443892_at	I1C0022H11Rik /// LOC100045488	100045488 /// 435970	25.5728	13.1563	26.8007	29.9033	45.2861	35.4557	44.0105	69.6603	68.5066	74.127	12.6744	33.8324	25.7963	51.4157	40.4086	17.9678	13.1674	6.93927	10.793	23.3274
1443897_at	Ddit3	13198	26.0926	29.7145	11.6652	96.9503	25.2645	104.085	172.113	18.6187	111.235	20.1425	20.019	15.4673	30.2522	20.9234	17.4883	18.7562	13.575	12.9333	10.456	18.0362
1443898_at	Bcl7c	12055	58.6031	50.5594	36.4188	236.194	113.926	73.4648	221.645	120.535	154.661	113.305	18.3398	41.5349	41.665	50.5607	34.8499	22.1079	17.3659	24.0352	9.66799	17.6681
1443923_at	Akap13	75547	213.518	129.541	14.5786	116.212	274.037	162.516	144.232	253.336	61.1506	31.4729	58.9458	55.2664	14.8272	30.1152	8.797	8.35197	15.4888	20.4382	14.4995	14.4768
1443968_at	Adarb1	110532	65.996	41.9814	63.4421	45.9826	111.757	158.938	113.174	37.6694	85.1268	29.4126	29.4891	8.8917	8.28571	6.11246	8.53199	6.42814	29.7645	28.1779	8.9361	20.8425
1443988_at	Rbm39	170791	21.4181	18.0693	12.3482	12.476	23.4137	27.5443	31.2431	9.95593	8.58859	10.3612	9.70016	8.44281	7.69632	7.90909	4.96983	7.1983	5.82263	8.7625	5.176	9.06127
1444004_at	Thoc2	331401	1217.7	825.214	456.611	564.941	1322.2	1394.51	1030.08	1043.2	871.898	311.101	579.563	325.073	165.606	65.306	83.3478	44.4602	254.938	273.047	100.112	162.466
1444086_at	E030049G20Rik	210356	129.302	77.4143	131.923	124.259	187.725	121.041	234.782	161.946	230.132	162.894	48.6695	59.836	30.0481	29.7741	7.83234	8.92571	13.642	7.68868	13.5295	11.4683
1444107_at	C130039O16Rik	238317	71.2488	71.3233	108.583	76.8074	39.9107	57.7195	61.451	31.8696	48.2603	48.7132	9.79837	11.343	6.68515	10.226	6.93113	6.26934	8.52611	9.11934	7.2876	10.0689
1444119_at	Fam168a	319604	44.6939	37.3054	59.2087	32.0127	50.1798	142.97	85.3266	30.307	46.8751	32.118	13	14.1919	11.8378	12.4883	4.11899	13.6842	12.2961	11.8089	12.7932	27.0489
1444152_at	Cugbp2	14007	14.1176	11.8834	11.1311	11.1115	27.7905	71.9605	16.7536	25.0562	11.4688	12.8176	10.5892	11.5712	11.4631	12.1448	12.336	9.81743	11.9503	11.6337	12.0602	11.9277
1444188_at	---	---	10.688	11.1108	40.0498	38.16	9.60242	84.8018	64.5041	12.5775	66.0308	27.1458	9.80021	6.55429	72.5352	5.71811	6.49133	35.2306	5.81662	5.81469	6.82145	5.80187
1444228_s_at	Herc2	15204	172.958	127.181	7.95876	26.1442	142.149	116.318	77.5592	127.635	29.888	11.716	35.0242	9.49259	9.24263	35.2261	28.8701	10.2589	35.7703	163.107	33.7139	20.6711
1444248_at	Rcn2	26611	94.6668	51.314	84.9559	48.4989	136.475	306.23	199.171	63.0833	73.9181	51.3515	53.6913	38.2413	29.8761	35.4312	43.0925	31.006	17.8186	13.2229	12.6742	39.673
1444256_at	Rae1	66679	136.129	96.7279	78.7492	94.1234	196.439	203.412	206.77	147.37	124.567	41.399	37.7244	40.3687	46.8196	36.3995	35.562	31.1942	40.4801	35.1947	13.75	23.3057
1444258_at	---	---	99.5183	75.0759	113.556	163.095	118.262	386.007	271.542	38.9734	190.279	134.286	95.8921	21.0576	86.6182	8.59825	11.3888	20.9724	8.03046	14.6562	11.3701	11.3159
1444260_at	---	---	8.885	19.215	36.1368	74.1437	15.0819	29.9411	42.0072	8.79509	65.7611	40.0603	9.20166	8.19654	8.49983	8.4484	9.20723	6.2477	8.31802	8.27902	8.76093	8.77307
1444268_at	BC004004	80748	73.3796	86.739	87.1058	80.7263	86.1864	184.814	94.9807	41.7192	108.028	44.0558	9.59633	27.0689	97.1695	12.6465	8.87999	19.9991	10.4834	7.3459	9.82652	9.10764
1444279_at	Huwe1	59026	29.2322	49.6327	20.5559	14.843	29.9871	125.766	46.0211	26.607	11.4408	12.4296	7.39774	6.16234	6.24556	5.62465	6.28062	6.01087	6.25297	6.21952	5.81172	6.2448
1444295_at	Neo1	18007	55.4381	32.2474	9.73997	10.7311	91.5696	128.534	23.9766	89.9674	19.4844	9.9614	11.7164	10.2499	6.78238	7.00027	6.2174	7.38953	7.07778	6.78014	7.26767	9.05063
1444320_at	Ddhd2	72108	410.759	332.848	282.476	302.772	448.91	737.044	522.764	300.257	322.479	142.473	179.713	76.2789	112.925	19.9259	13.1274	18.0407	8.56608	6.92621	7.59015	10.3247
1444326_at	---	---	33.0476	17.9425	7.38667	15.1625	58.4557	33.0557	23.2365	12.1979	35.1899	7.1077	7.24543	6.8837	7.264	8.24339	6.65417	7.6438	8.1006	6.60297	6.52134	6.91308
1444343_at	A130064L14Rik	320257	34.1509	17.5441	42.1791	37.1023	33.7833	44.4081	32.2382	37.33	62.0987	58.1966	9.42664	12.7556	11.0706	9.11707	8.16142	8.0937	5.16613	8.77586	9.38819	15.1125
1444377_at	---	---	36.6298	34.4273	33.4963	40.9761	36.7961	120.262	48.7997	30.9461	55.6095	17.0732	18.6342	10.841	12.8828	6.90528	10.8979	10.0061	10.4064	5.52715	4.48174	4.37386
1444408_at	B130040O20Rik	320962	52.6345	39.3896	68.8494	13.1505	37.7804	68.5048	41.9	15.156	43.1024	16.3472	17.9036	9.31438	10.1169	9.80545	8.50562	6.86678	9.13812	4.83933	9.67858	9.46581
1444416_at	Cenpa	12615	43.2794	41.9327	38.1636	50.3752	146.309	216.429	181.917	127.363	113.637	51.5767	33.9368	30.2813	20.64	10.7459	7.14943	6.2729	7.05391	6.78641	7.5349	12.3356
1444456_at	9030425P06Rik	319680	84.5923	22.6516	62.1509	20.9226	97.4311	68.0842	37.2758	30.756	58.3382	15.5112	7.66327	20.012	19.7767	9.53804	14.4496	17.6337	7.48315	19.7077	7.0792	11.2316
1444485_at	Shq1	72171	94.8181	109.131	90.5173	100.359	140.312	255.948	205.751	90.9149	207.351	106.126	39.7079	34.2602	30.8335	13.0216	12.8831	8.18018	12.8175	13.5548	15.9746	45.4225
1444498_at	---	---	93.267	100.466	66.6163	88.3294	97.8607	265.656	193.567	60.3838	95.3704	73.6716	51.4245	12.1016	48.4136	8.96376	9.27619	71.5671	17.644	47.1661	20.1904	33.4496
1444507_at	Usp53	99526	62.2931	96.9346	25.423	47.4227	70.9961	374.107	99.382	51.1253	178.647	51.0701	34.2541	23.2542	64.917	23.4063	9.65062	22.7305	8.18363	20.4537	26.007	15.4055
1444508_s_at	Arrdc1	215705	52.5675	65.0011	56.7272	23.8222	74.317	74.1312	53.7482	34.3644	38.6931	42.5087	12.6769	11.2171	8.4165	6.76513	6.67452	6.41255	6.64119	6.72833	6.76845	6.51702
1444538_at	---	---	60.6778	56.1509	29.9463	22.7161	66.5744	180.606	42.1303	61.6948	83.2083	25.3995	15.0133	22.0203	22.1043	18.8863	14.5764	13.2565	16.4776	14.1082	14.9933	14.9816
1444557_at	---	---	68.7	60.4772	40.2682	29.1636	73.6002	186.388	73.6756	67.9859	92.7556	11.5185	72.9888	18.953	19.8626	19.1135	15.9981	17.9061	26.4316	20.327	13.4504	19.151
1444585_at	Adc	242669	27.2956	46.7621	32.3004	31.9638	47.6943	160.266	101.867	29.7512	46.9117	21.2279	32.1443	7.84643	6.16481	5.08061	5.06321	4.80727	5.26711	6.31522	5.10241	5.5944
1444604_at	---	---	21.9297	14.1177	14.5427	20.1935	38.8983	42.5819	41.0134	22.4568	38.2295	13.5189	20.8221	14.7444	12.9927	6.87478	4.755	7.05363	4.73769	6.97848	5.26058	12.5899
1444620_at	---	---	38.7863	40.5232	15.9283	16.9731	90.1911	124.37	15.2202	19.9377	24.5937	14.589	23.8538	16.3356	11.4044	15.7274	15.7107	13.7433	16.2538	14.4725	17.2652	17.1197
1444646_at	8430420F16Rik	71498	65.2783	19.7239	33.2594	192.483	101.674	39.4858	107.007	129.289	153.701	195.152	38.866	93.9104	35.5815	11.6084	9.52545	14.0607	9.69217	9.13186	13.6163	15.4723
1444647_at	Plaa	18786	44.6324	33.179	58.794	35.6502	52.1817	89.6121	59.2644	39.539	24.2847	15.4668	28.2958	19.9623	15.5044	14.4138	14.2396	10.7567	14.4392	13.7317	15.0381	23.9882
1444670_at	A130004G11Rik	319715	11.0278	30.6893	7.83207	9.29236	12.1388	152.971	19.5995	22.9185	16.0042	10.9434	8.00514	14.5079	7.90714	7.81693	7.64373	7.6407	7.80256	7.75395	8.13329	15.0891
1444677_at	C77673	97696	241.107	118.363	60.561	118.045	325.239	397.657	214.641	287.778	138.435	92.9222	138.408	108.936	95.1116	80.3169	61.3156	101.501	80.1136	76.1668	61.8884	98.0526
1444699_at	Sf4	70616	10.9865	12.8689	30.1281	20.6372	11.4811	73.0896	63.8555	10.5808	20.1062	30.8945	16.6344	9.04317	11.2808	9.41841	11.3577	10.8616	9.13851	10.0657	8.98473	9.23578
1444701_at	Mex3c	240396	49.3359	67.7382	19.5744	27.5753	69.5513	165.545	75.0734	19.8512	67.8004	22.9145	43.0798	8.96858	21.7901	7.25903	9.73583	20.2012	9.70985	82.2841	36.9912	23.4364
1444722_at	---	---	11.6417	18.9516	60.3696	4.56131	25.0739	121.839	33.9173	12.3686	68.6391	13.4359	9.71874	9.28907	68.2056	5.07701	9.48972	87.7562	6.68105	30.7363	29.7418	6.63755
1444728_at	---	---	14.9239	78.5303	14.4117	21.529	27.3333	264.016	33.1678	24.3593	46.0442	13.9838	19.6092	14.397	14.5857	9.8072	8.09562	9.52099	9.32868	10.2173	8.77751	14.7103
1444743_at	---	---	49.9877	42.4686	90.362	53.4971	74.0734	55.1426	65.7497	76.4084	102.464	64.7823	29.8349	23.9352	20.596	22.7574	19.9253	19.3519	22.0389	22.2993	24.5575	23.8484
1444757_at	---	---	17.9475	24.049	27.2085	23.7607	18.1911	101.449	76.0585	9.22376	33.7376	12.7526	7.52491	10.7348	9.18987	7.50263	4.05678	5.53088	4.26163	4.03328	9.23044	7.2805
1444811_at	Sec62	69276	90.7914	54.8917	36.3422	24.9713	93.9453	135.865	84.5749	51.6997	67.3932	15.2152	41.4633	20.4026	34.9598	19.4435	17.4881	19.4834	20.5331	23.0746	14.8656	20.5429
1444855_at	---	---	27.2224	23.4889	30.9522	28.7956	48.0182	73.886	86.7882	31.4902	15.576	20.4742	13.6567	13.4343	13.2731	16.0292	13.3694	12.2817	13.3092	13.221	12.9312	12.6543
1444856_at	---	---	60.9262	23.7425	44.0263	21.2919	82.1791	105.563	92.9032	67.4861	89.8603	44.6145	18.7803	22.0401	65.5877	23.7177	18.4382	16.054	10.8935	17.28	8.27715	23.2275
1444886_at	---	---	45.4542	41.6398	54.0149	21.9253	58.7135	94.4445	68.5656	51.3431	60.8701	19.0027	12.7256	26.7197	25.9775	17.2765	11.0474	45.7685	18.0179	19.3864	12.6675	8.6119
1444908_at	Habp4	56541	20.7669	7.66294	11.4215	34.0536	32.9459	11.1147	14.7834	29.3218	41.7735	25.513	12.1228	21.6604	11.5592	11.459	8.64049	13.126	8.60295	8.55659	12.1271	11.6733
1445081_at	A930041I02Rik	320271	28.9172	41.483	9.17816	42.4071	26.4131	38.1056	31.4123	28.45	8.98536	7.83039	20.3885	8.50452	8.44686	10.3018	11.0632	8.30055	8.72599	10.845	10.537	12.4982
1445181_at	Eml5	319670	50.845	39.8261	34.0152	31.3141	46.3056	134.258	44.6683	51.556	35.6584	25.7671	13.2319	21.4681	12.3802	13.0095	12.8635	10.9246	11.6028	11.305	11.5323	12.803
1445241_at	Rab11fip4	268451	356.698	295.705	468.753	858.938	598.346	507.571	786.36	596.627	861.731	1107.65	225.198	240.007	277.482	52.2171	13.3692	35.6861	64.0343	66.6497	73.8477	12.2967
1445273_at	D10Ertd638e	52658	55.5548	26.6628	17.0781	28.2775	132.46	169.941	56.2933	82.7401	21.4217	16.33	17.9812	30.3605	11.1783	14.5293	13.357	15.4299	14.4714	13.2138	13.6647	10.2238
1445307_at	---	---	28.1147	21.6015	16.3358	13.989	33.4837	175.917	22.8044	28.545	19.347	9.84579	6.98983	8.11198	6.1731	4.84923	4.77321	4.77202	4.85681	5.5753	4.8808	6.93667
1445350_at	---	---	25.7311	25.9045	7.7975	18.7069	35.9657	24.9501	44.2569	33.8119	30.3258	9.54465	9.60952	6.71346	8.72945	7.28305	7.09779	6.92754	7.13503	7.18282	7.52455	7.31481
1445375_at	Itsn2	20403	10.2985	13.8799	18.1295	6.39445	21.1804	63.385	14.8193	9.70835	12.2288	9.31655	15.3435	6.61863	6.67974	6.79314	7.54789	6.45226	6.75219	5.28071	8.21316	8.97092
1445381_at	---	---	199.989	128.795	193.449	402.628	277.781	183.419	305.041	308.529	407.016	302.416	116.736	109.188	85.01	41.1541	20.8715	14.4831	21.7989	6.6711	7.44749	20.1507
1445461_at	---	---	35.66	68.2538	129.978	102.177	46.6954	189.719	223.432	32.8304	88.0452	105.177	29.4576	17.4221	26.8166	20.1961	23.314	17.6677	10.9613	18.2517	11.324	10.937
1445499_at	Zc3h13	67302	697.324	531.286	279.187	638.145	803.863	993.165	883.731	680.751	444.316	283.956	234.293	213.76	156.954	88.1974	57.0234	27.321	47.2518	13.0553	17.4956	24.0259
1445503_at	Gm715	279618	382.071	215.922	290.971	297.067	434.986	267.659	452.492	408.266	355.667	350.365	82.7101	98.047	31.5962	6.67427	7.47624	5.27108	12.6456	4.82575	5.07391	5.49809
1445831_at	---	---	54.7802	43.4408	51.9201	29.9122	119.915	135.504	56.1724	59.4595	46.5514	36.8269	10.5595	18.5899	7.43437	3.79552	4.38065	5.40406	10.1223	15.5007	10.0599	10.3469
1445881_at	2310035P21Rik	75683	113.765	161.116	52.0462	248.518	202.127	953.218	698.388	115.413	532.221	223.745	47.163	44.3732	117.516	35.576	29.736	64.1996	11.434	38.041	28.4099	27.2045
1445884_at	---	---	48.3353	25.4423	41.2899	17.9246	104.768	114.653	29.0291	36.2651	38.9165	16.9504	16.5362	16.4856	13.6543	14.5706	16.1885	15.9732	14.8228	15.0573	15.3469	16.0793
1445897_s_at	Ifi35	70110	154.745	30.3992	33.297	235.963	222.658	38.1179	49.0829	251.988	62.6211	89.8514	28.8461	232.316	48.5036	13.1057	27.3605	6.13511	59.6098	14.8569	5.94929	9.8216
1445933_at	---	---	21.3951	51.7741	78.8657	23.4284	70.0845	208.647	66.6955	36.2257	66.2763	45.6336	19.2338	7.00899	6.6446	5.05874	5.02833	4.83919	4.78894	3.78991	3.86214	3.81207
1445957_at	---	---	13.9002	10.5087	5.32997	5.18079	20.1034	138.125	12.5426	16.0155	23.0943	5.23258	11.8636	5.40331	5.30081	5.38428	5.32717	5.54276	4.92403	4.72955	5.43028	5.37521
1446012_at	---	---	20.9255	12.0467	27.196	10.0346	50.5481	69.7348	11.9506	26.8283	27.6546	12.9918	15.292	10.1029	19.0739	9.81545	7.91955	13.9503	7.24586	5.4604	7.28265	7.34035
1446086_s_at	Gli2	14633	57.4837	62.7331	122.404	82.6293	137.913	197.49	218.89	107.03	145.192	132.081	34.6943	22.3186	14.3376	40.6845	36.527	18.2413	49.0284	21.8682	16.8338	10.2662
1446127_at	Zeb1	21417	24.7378	15.8128	10.4053	11.7666	43.4625	76.8329	11.3565	29.1339	46.8497	10.31	19.7954	10.9336	20.0436	12.3458	11.1199	10.0897	11.4465	8.64477	11.336	11.1489
1446146_at	---	---	81.8193	167.003	35.2318	28.72	106.028	236.142	120.983	108.001	46.6237	28.5344	56.6393	26.3945	17.9773	17.5907	12.2713	21.6123	11.5674	35.7166	20.5466	25.4292
1446147_at	Rbm39	170791	219.687	737.437	1680.06	1133.62	348.379	1992.6	2148.46	189.623	1679.72	1018.87	656.396	87.9159	1014.27	59.8843	64.3481	477.796	28.7152	136.234	144.195	118.786
1446158_at	---	---	16.2011	12.2035	12.6855	14.4819	44.3211	61.0109	38.3732	28.3052	32.2865	18.2547	14.1607	13.3101	12.5764	5.61267	9.8787	5.44616	8.94529	5.38711	4.23281	28.3951
1446164_at	Tgs1	116940	91.7805	47.9077	70.1721	55.7261	157.632	237.259	115.443	91.6582	164.899	50.2204	18.711	21.1798	31.8955	12.9336	9.6006	17.4657	11.9541	6.50028	17.8316	18.1968
1446234_at	---	---	32.824	14.351	7.49716	7.99854	14.7804	73.717	17.7473	13.8781	10.2708	7.08864	8.38169	7.50827	7.02396	7.80916	7.64614	6.90724	7.61345	7.65215	7.81448	7.78654
1446268_at	Cyth3	19159	16.4762	16.0715	9.8802	24.8553	20.8294	55.9332	42.0966	13.3614	25.0921	11.672	13.8787	11.421	12.977	11.535	10.139	12.6758	12.2732	9.92854	13.0087	21.8818
1446269_at	Hbp1	73389	35.3791	11.4721	21.0248	49.8653	48.2115	20.3661	46.652	55.0649	37.0254	41.5929	14.2125	17.2958	15.5214	10.18	13.5778	14.071	13.5324	13.3076	14.8004	19.3865
1446345_at	---	---	13.7839	26.5911	52.2753	20.8165	36.6562	74.841	68.0295	21.8704	47.2607	39.4909	9.3973	13.1829	7.06833	5.7459	5.69972	5.5724	5.97056	5.6668	8.04558	11.7199
1446365_at	Vti1a	53611	81.3303	46.913	17.0181	32.3609	155.368	210.967	35.4609	87.7916	132.846	19.1891	35.7555	26.9232	57.1887	32.2068	31.2754	43.5372	10.8281	7.03654	10.6594	40.5087
1446407_at	Mysm1	320713	31.7824	18.5751	28.4832	16.3856	44.1494	71.8354	36.6262	36.7138	40.4852	17.7694	17.1684	18.3845	25.9503	16.3947	8.46125	17.9629	8.42581	8.32646	8.74746	8.80069
1446409_at	Gtdc1	227835	18.304	24.71	23.24	12.3989	43.4724	91.2934	26.8942	21.175	66.799	12.1474	16.778	13.8528	22.9156	14.6539	14.3989	16.4165	14.588	13.0057	15.2728	17.0164
1446426_at	---	---	32.2703	30.3069	7.4767	16.7027	92.6538	145.058	22.8636	79.9803	34.0648	21.9768	11.7209	20.9081	11.0124	6.74744	6.67046	8.06153	25.635	22.6541	18.655	24.6143
1446427_at	Glp1	100009600	198.943	346.871	274.465	137.334	153.353	282.046	196.043	120.468	62.2957	110.926	113.384	29.3266	7.15334	7.21367	7.97515	6.35194	6.8038	6.7112	7.08813	6.80248
1446434_at	---	---	57.3198	72.0383	20.322	37.8823	54.0271	161.974	71.1422	57.3256	58.0824	21.3837	26.999	19.0172	23.6349	25.422	6.48878	11.449	6.4869	6.00881	11.7437	25.7602
1446512_at	Zc3h15	69082	113.997	116.221	48.7488	58.9384	121.142	299.488	163.552	96.8763	75.0354	27.3973	71.7677	17.7074	43.3243	14.7615	18.3479	7.70933	15.3934	36.0002	7.23168	61.3667
1446518_at	---	---	19.7004	20.7219	8.72813	9.75816	15.7696	55.3695	31.0245	10.6016	14.4719	8.4431	9.35042	8.41945	5.87127	7.74975	8.9454	6.74339	7.66937	8.8045	8.1197	9.41649
1446550_at	Gspt1	14852	158.643	92.4883	58.7797	120.056	187.793	329.923	284.432	130.916	436.533	91.724	67.5325	71.0332	242.126	65.4348	66.9498	206.995	26.8751	62.8377	69.1247	46.1091
1446614_at	Dgkz	104418	5.94258	13.1047	11.9551	19.8751	11.5884	45.2615	49.539	5.88387	8.28758	22.4816	5.75849	5.14071	5.60393	5.62967	5.17991	5.27088	5.1591	5.63991	5.75448	5.92262
1446730_at	---	---	12.6634	12.6623	9.43712	68.2007	13.7896	52.3841	144.595	15.4196	69.7828	63.7734	20.5945	9.39475	12.474	11.3201	10.2548	11.999	10.4615	12.4291	11.1047	15.5237
1446735_at	---	---	138.181	67.6297	92.998	33.3524	112.655	253.531	146.99	94.9883	85.3492	47.9025	28.8919	16.202	10.9195	6.17148	10.7293	5.99144	8.66801	8.99363	6.19797	20.4846
1446761_at	D8Ertd56e	52067	24.658	27.0783	49.6893	107.342	26.7837	119.318	150.118	25.9765	199.132	121.337	32.0901	24.1421	127.622	18.4884	22.3268	26.4531	23.362	20.3973	23.1792	35.5849
1446883_at	4933427D06Rik	232217	32.1936	33.5478	5.47532	52.6486	44.2733	23.7292	68.7162	18.0756	5.63646	16.09	5.44435	5.34308	5.35213	4.902	3.96516	5.23436	3.93757	3.93655	4.02143	3.94924
1446920_at	---	---	23.2789	24.4107	16.2072	12.2319	39.6485	85.9597	11.4582	16.0197	22.4193	11.8616	12.766	11.8618	9.73426	11.4341	11.6556	7.2151	7.24601	7.51746	12.3682	12.22
1446929_at	D130062J21Rik	100038651	34.2504	18.8281	18.2723	33.8869	67.7595	132.426	52.2141	50.2257	68.4535	31.472	13.7518	24.4561	8.48966	8.62493	8.58173	9.41182	8.56283	8.49104	8.77872	8.52655
1446946_at	---	---	27.4004	13.033	13.1919	13.0937	46.2427	97.3301	13.0414	25.6083	36.9906	12.4963	13.0308	13.1865	45.5307	13.0054	8.70006	13.2981	12.8382	14.2128	13.2533	12.8773
1446948_at	---	---	79.7012	61.3106	66.3838	62.0484	107.535	109.596	183.718	33.2791	85.5076	24.4787	16.7448	14.1667	19.9009	9.67516	8.576	9.05847	7.06905	7.09089	6.38033	7.63639
1447139_at	Bcl7c	12055	61.4092	47.3394	75.0764	105.801	120.237	122.745	137.581	124.319	156.857	134.878	18.2699	49.0281	40.4113	35.1467	58.9802	55.5403	28.6688	25.6941	22.1413	41.5787
1447156_at	---	---	20.5234	27.1996	34.9873	15.1291	26.1235	37.2667	26.1747	28.8232	22.5124	8.19595	9.76791	9.62752	6.48005	6.66313	6.22261	6.12267	7.21578	7.01109	7.6317	9.45901
1447164_at	---	---	25.3321	47.439	22.3534	19.94	59.0737	116.314	42.6001	10.2596	13.3869	8.9784	13.4947	9.18003	9.09854	7.93122	9.75715	8.58408	10.2992	24.1361	10.4661	12.9433
1447207_at	Zyg11b	414872	31.3255	27.1749	59.4682	84.3775	30.2717	47.9602	116.105	55.0376	50.5035	103.565	25.4941	25.073	11.1774	8.86637	13.0444	9.51879	11.5238	9.69838	11.8483	9.30949
1447234_s_at	Snx6	72183	1692.52	912.42	1321.72	2089.25	2568.02	1080.57	1933.64	3257.72	1852.42	2309.94	889.983	1271.61	648.099	539.532	314.352	124.523	242.455	125.553	88.1326	121.418
1447270_at	---	---	65.0862	102.918	80.6332	35.25	99.1128	314.691	90.2788	69.9286	90.8535	44.6272	42.6562	44.0007	43.9363	25.8777	24.6035	68.767	19.2346	51.8744	18.1334	28.6066
1447364_x_at	Myo1b	17912	62.4682	17.1168	60.7341	31.7001	36.0172	36.4281	50.433	69.6584	37.42	46.3427	13.2266	16.5649	12.7389	11.9378	11.7467	9.11725	13.5269	11.2171	11.8347	12.4704
1447448_s_at	Klf6	23849	52.1496	61.754	51.2835	120.704	28.8323	38.6719	49.1897	11.8128	15.075	23.4223	16.0678	11.8512	10.5783	11.3254	11.2615	10.2395	11.4069	11.0757	11.6583	11.4551
1447500_at	Cux2	13048	83.6396	35.9783	76.3708	42.8765	88.9982	73.1755	83.4582	52.5599	62.0829	40.5298	22.2342	16.8163	14.9254	9.98874	9.94603	7.79498	9.6814	5.87484	10.276	9.8414
1447509_at	---	---	15.2313	10.8829	29.0285	70.5325	37.1663	17.4691	60.9389	14.4036	41.9348	44.7202	6.25903	13.4769	13.6666	6.36812	6.25883	10.5411	13.3954	11.8365	6.75038	10.8935
1447526_at	D5Ertd255e	52183	38.1742	59.1346	14.1069	10.1628	26.0359	121.921	12.5866	15.0455	19.3828	10.281	17.1983	10.7552	13.9339	12.1778	12.2284	11.8804	12.1414	12.1228	12.2182	11.9204
1447540_at	Tigd3	332359	403.515	293.228	268.28	89.9446	320.54	185.955	163.529	273.891	100.29	95.3618	87.884	63.5175	26.8318	69.2277	28.1761	22.7119	25.6692	6.2483	9.77491	6.671
1447564_x_at	Piwil4	330890	55.5325	14.6789	14.4942	21.2719	46.2507	12.8382	14.2873	83.1136	53.9954	26.0729	14.8447	39.8155	14.5962	16.6715	10.8677	10.115	16.7122	15.8845	11.7664	15.0627
1447725_at	C030034E14Rik	77469	25.2435	6.99626	24.3513	24.0852	48.4038	17.041	21.6423	40.5714	43.4146	31.6553	11.3032	16.8829	6.97442	6.52007	6.26514	5.78438	6.23923	6.15837	6.3993	6.23506
1447788_s_at	Tspyl3	241732	53.0341	9.48903	50.6896	14.8013	38.8124	12.245	12.53	24.8028	18.1193	7.86509	5.24961	5.98465	4.4332	4.51434	5.51944	4.28225	5.8338	4.41766	4.56562	4.43505
1447830_s_at	Rgs2	19735	250.996	75.8345	106.749	198.765	130.959	25.8609	55.8178	66.0462	24.0748	26.603	8.82972	30.6755	8.21439	12.4641	28.7985	8.72682	45.0432	17.2925	9.30096	22.6768
1447863_s_at	Nr4a2	18227	109.583	180.167	75.6709	582.674	46.5975	40.9062	117.643	34.998	25.2092	41.072	14.9656	39.4541	20.8949	7.27562	7.15803	6.68308	10.3728	10.2473	11.0353	10.6042
1447924_at	Nucks1	98415	545.167	549.285	730.424	323.857	537.619	560.883	723.656	357.302	339.457	427.549	116.74	86.6705	85.617	91.8567	85.7977	57.4989	104.939	85.1933	87.0172	85.4628
1447933_at	Kif26a	668303	372.322	123.231	118.602	574.674	618.731	255.313	334.432	561.862	305.96	437.516	132.298	374.087	156.069	53.1819	27.206	13.1744	22.9039	12.1786	9.2367	3.67537
1447970_at	Rpp30	54364	28.1273	13.8811	16.5114	17.6904	51.3863	62.781	79.1101	30.9522	33.9136	17.6605	4.49287	9.5853	15.8769	5.91502	9.37071	9.7779	3.59487	3.41311	5.92008	5.85765
1448012_at	EG546524	546524	88.7893	39.8647	75.4236	48.3727	91.5693	98.1915	45.2774	40.8374	46.4905	26.9941	25.0498	16.9261	5.08235	7.65953	4.68248	3.81895	4.80182	8.59248	5.07945	17.1473
1448018_at	---	---	16.17	16.4835	41.7803	16.3202	30.5815	79.189	29.7421	14.3082	48.8001	23.5613	15.0446	13.1065	14.8203	11.3055	11.1242	10.1633	6.92266	7.31155	14.2195	14.9265
1448026_at	Chd7	320790	46.3793	22.2496	54.2543	250.186	89.5513	40.4291	78.8477	77.5469	156.37	90.495	22.4697	101.18	78.3429	9.66033	9.63749	30.9183	13.8029	20.7992	22.9342	14.2305
1448029_at	Tbx3	21386	59.2398	16.9093	21.2432	93.6369	127.425	19.0321	24.3405	131.905	39.0735	51.4013	16.2569	55.7455	19.3073	19.5893	14.9329	17.4846	13.5104	12.4788	16.2533	17.7442
1448050_s_at	Map4k4	26921	40.5929	20.5519	30.9196	133.325	87.86	44.7545	48.5842	132.126	64.052	65.7681	31.9215	66.8186	25.3396	12.8841	6.83893	6.29875	6.81708	6.48028	4.7761	6.50149
1448134_at	X99384	27355	261.06	159.378	134.227	482.56	331.501	158.433	267.498	388.574	331.227	328.105	168.346	266.37	145.212	36.7589	28.3566	43.8723	27.0977	18.6608	32.0121	10.304
1448148_at	Grn	14824	715.617	742.468	923.294	562.621	557.482	791.433	589.04	362.656	515.681	349.702	237.888	120.498	81.4658	12.209	10.2121	7.18061	14.2638	30.6666	12.2643	16.0019
1448201_at	Sfrp2	20319	21.3279	7.69109	12.9017	125.223	37.6481	21.9562	80.7166	47.4622	135.942	111.656	14.1127	26.8765	15.9572	6.53816	6.47572	6.9104	6.448	6.10597	6.55807	8.1931
1448205_at	Ccnb1	268697	1125.44	549.118	882.921	921.785	2278.96	1754.4	2147.25	3109.62	2185.9	2367.15	1502.99	945.527	351.779	152.056	104.939	103.051	182.883	161.724	131.16	154.71
1448218_s_at	Ywhaz	22631	238.241	318.467	582.765	1267.99	367.054	349.377	943.044	441.459	921.567	1065.16	253.083	294.825	367.082	87.9684	52.6815	48.9043	28.6083	21.071	23.0419	31.5684
1448226_at	Rrm2	20135	1199.03	1834.16	2928.43	1094.96	835.502	1000.12	1478.73	478.787	801.649	723.512	509.949	116.165	102.362	62.2718	87.5473	196.187	250.081	625.034	561.394	694.209
1448227_at	Grb7	14786	89.9346	24.9905	41.0158	118.91	132.714	52.5006	90.2431	118.942	79.5711	110.48	36.1457	57.9668	33.4183	6.35499	13.6953	8.58165	32.3669	15.206	17.4546	11.9039
1448229_s_at	Ccnd2	12444	468.499	118.003	67.4999	707.985	713.062	156.886	271.71	1074.76	452.04	320.782	107.423	552.824	174.881	103.823	32.6824	15.7339	38.3327	19.2745	13.5412	17.3176
1448235_s_at	100039943 /// 100040234 /// 100041386 /// 100041667 /// 100042549 /// 100043683 /// 4932431P20Rik /// EG432959 /// EG545506 /// EG545555 /// EG546331 /// EG666011 /// EG666969 /// Hmg1l1 /// Hmgb1 /// Hmgb1l /// LOC100045876 /// LOC637733 /// OTTMUSG00000007611 /// OTTMUSG00000015121	100039943 /// 100040234 /// 100041386 /// 100041667 /// 100042549 /// 100043427 /// 100043683 /// 100045876 /// 114675 /// 15289 /// 432959 /// 434174 /// 545506 /// 545555 /// 546331 /// 625781 /// 637733 /// 666011 /// 666969 /// 667879	2215.39	1736.84	3381.85	2864.2	2167.47	1676.59	4345.46	2091.22	2947.39	3167.88	590.337	487.195	786.197	362.295	142.384	208.623	158.63	143.541	202.347	380.555
1448239_at	Hmox1	15368	35.4905	45.9086	45.2798	129.281	44.2629	62.871	137.816	62.578	129.027	150.538	46.6234	22.4906	24.0459	21.4691	11.9094	10.2243	20.7505	15.5758	10.7328	23.3709
1448248_at	Crk	12928	1205.55	1199.68	2098.78	1247.03	983.466	1131.01	1300.55	699.431	835.371	947.82	221.823	300.717	180.842	227.3	172.344	150.059	116.957	76.1707	105.157	146.665
1448261_at	Cdh1	12550	82.4971	25.2996	39.5048	90.5097	118.72	26.4548	74.764	97.8808	103.161	86.4496	22.0677	69.4236	26.5634	18.4456	19.2934	10.1316	12.6711	11.0268	11.9405	10.9341
1448269_a_at	Klhl13	67455	725.07	172.449	401.553	733.609	1096.97	261.276	694.312	1128.17	474.12	700.135	112.162	304.405	128.569	64.158	32.6256	15.498	30.8416	11.0069	15.6227	13.2775
1448272_at	Btg2	12227	129.752	108.31	154.066	700.206	116.107	142.717	220.713	81.6289	101.816	106.353	33.6728	68.2044	30.3124	11.6485	19.4246	18.9782	18.1978	17.6194	17.8296	20.2393
1448288_at	Nfib	18028	30.2943	17.4315	11.1295	92.3204	45.203	20.2402	34.4336	85.55	38.6105	32.9798	8.23614	63.6616	27.0634	7.05392	7.67516	6.32435	15.3004	6.55884	6.79973	13.2184
1448297_a_at	Tnk2	51789	717.798	284.06	471.724	654.417	981.757	428.036	550.614	696.711	476.733	552.932	88.9018	203.716	145.049	109.129	96.9547	52.7301	103.055	58.9731	84.4653	32.0108
1448328_at	Sh3bp2	24055	66.52	54.4733	70.82	33.1307	80.3812	64.2033	77.7281	51.9697	29.3718	43.5696	16.8416	13.4799	6.40092	4.45772	7.06639	4.13037	15.6182	5.14001	4.52134	4.96478
1448346_at	Cfl1	12631	342.732	403.148	1199.27	1015.08	343.753	356.048	1445.57	342.57	1528.93	1235.65	417.609	383.553	641.629	325.09	250.473	296.755	177.596	276.744	429.122	234.397
1448393_at	Cldn7	53624	65.0062	61.9487	69.4288	19.7127	30.8914	55.4347	51.9655	17.3062	35.7835	14.9229	42.4778	10.8032	38.622	14.4764	10.2668	14.1944	7.52736	6.70507	10.424	7.6079
1448405_a_at	Eid1	58521	623.687	390.901	496.789	313.012	418.749	242.927	313.389	390.528	267.083	208.999	53.5771	112.337	74.3224	39.7968	62.3083	8.3685	70.1047	11.6698	7.43456	7.04415
1448411_at	Wfs1	22393	68.1388	29.8903	70.8036	46.0923	75.7064	55.1597	65.3787	47.331	49.9616	49.3607	14.6565	16.4024	7.23414	7.51737	7.3944	6.84637	7.48266	7.25858	4.82298	10.4327
1448436_a_at	Irf1	16362	166.713	115.068	114.801	881.838	286.576	176.298	359.933	298.904	282.156	481.551	154.703	343.718	144.898	25.8101	22.2152	16.0498	32.8669	13.9324	13.7684	30.5672
1448465_at	Nipsnap1	18082	69.8293	36.0807	53.0308	126.332	88.2453	50.8646	101.366	98.7178	79.9658	109.602	17.9041	44.8264	34.1179	6.37308	6.29898	5.97774	9.26867	8.51846	12.9945	36.1188
1448474_at	Nek7	59125	169.418	190.602	213.96	315.316	187.058	182.044	246.762	96.4952	131.519	195.988	67.4332	40.6558	33.021	9.84304	24.8319	21.7961	28.526	9.10742	15.628	57.9975
1448519_at	Tead2	21677	205.579	123.204	121.176	539.046	311.809	177.227	407.768	510.195	448.768	416.872	214.436	191.562	77.2902	26.6294	12.5334	11.87	42.6728	52.2042	39.2586	14.1786
1448546_at	Rassf3	192678	110.947	86.8518	141.438	436.392	90.9969	84.079	310.512	128.803	222.475	263.215	53.3184	70.6112	90.7474	13.8812	13.9646	7.23848	14.3993	10.9307	8.96456	14.8252
1448547_at	Rassf3	192678	130.362	55.2531	87.5007	254.465	100.014	77.3442	171.21	165.083	101.828	131.756	49.3126	33.1902	49.3738	11.6333	6.29379	16.9357	11.464	5.92343	6.05741	5.94179
1448549_a_at	Dpagt1	13478	76.6818	72.344	107.282	29.7578	92.4743	88.841	87.5517	29.9898	60.2833	25.9917	14.7273	22.1688	14.5895	12.1102	12.6631	11.438	13.3957	12.9827	12.5773	13.1279
1448553_at	Myh7	140781	47.8963	24.5751	25.4506	39.2088	81.4765	45.883	67.9505	130.334	74.0096	49.5324	5.39847	20.5549	14.2746	5.55995	4.99327	4.71691	4.97601	4.92624	5.14036	4.71058
1448554_s_at	Myh6 /// Myh7	140781 /// 17888	243.42	92.432	138.181	391.76	529.134	233.333	381.383	678.5	482.759	479.541	124.225	267.877	140.156	54.0346	22.2645	6.5959	92.585	46.3254	13.9517	5.25898
1448562_at	Upp1	22271	112.746	66.5555	37.4593	399.523	298.247	71.8626	102.045	297.682	154.117	199.497	77.6642	445.842	197.274	80.0926	45.0894	16.8987	30.355	20.165	16.9175	20.7117
1448621_a_at	Smpd1	20597	120.872	149.577	161.184	38.7995	71.5237	126.052	34.9535	54.788	104.426	22.4476	54.4001	18.4416	18.2488	16.3648	18.4134	17.5188	12.2149	18.4758	18.6632	18.4437
1448634_at	Ralbp1	19765	232.727	300.327	430.231	1030.06	400.288	454.522	662.043	367.673	663.533	747.078	205.253	228.234	190.562	47.8721	34.5551	22.0969	22.2345	16.0509	21.7311	21.2909
1448647_at	Man2a1	17158	114.953	114.854	67.161	293.304	97.8792	203.385	107.093	276.133	239.983	267.211	95.6881	167.307	129.316	27.9808	108.26	43.188	163.622	129.985	47.2366	25.4856
1448661_at	Plcb3	18797	197.982	174.221	397.083	132.291	183.241	184.985	194.968	71.5636	134.11	110.368	45.7308	47.3327	34.6422	26.3491	23.4078	31.5878	16.4805	9.37139	13.4884	13.5379
1448688_at	Podxl	27205	125.473	140.507	97.4991	306.371	223.311	216.278	268.01	278.022	188.936	334.764	68.1535	50.6679	58.8686	11.9626	12.4896	40.0397	10.8142	7.29516	38.355	9.61344
1448694_at	Jun	16476	182.135	66.5283	39.7748	312.808	66.7479	26.3157	49.1617	99.2453	35.3285	68.614	27.7738	49.6594	34.0636	29.3028	50.3093	28.9954	65.5976	28.1391	24.7776	36.4755
1448698_at	Ccnd1	12443	911.09	1017.36	1297.87	816.015	998.472	1705.07	1329.09	635.573	816.526	802.731	306.196	140.4	70.852	27.9622	18.6958	9.89905	23.5723	8.59421	4.95013	7.5586
1448710_at	Cxcr4	12767	34.1571	28.2459	53.7804	69.422	19.3675	30.6556	51.6999	20.4987	35.0378	24.7627	9.97925	11.2264	9.69422	5.77329	6.96806	11.441	8.68625	8.01636	9.01624	8.81705
1448711_at	Mcm3ap	54387	2053.73	1289.49	1951.3	2266.06	2688.65	1891.37	2776.53	2311.55	2865.28	2481.32	808.566	929.033	922.625	569.674	476.563	459.083	416.66	351.587	381.901	418.62
1448732_at	Ctsb	13030	34.4366	171.913	477.797	448.59	32.2436	116.868	289.912	21.1523	281.107	419.771	49.9043	19.182	55.9353	4.08026	4.61067	5.70499	3.8705	4.5883	4.43073	4.07481
1448737_at	Tspan7	21912	58.1204	25.8739	36.961	107.792	42.2257	49.1303	123.931	46.6402	75.9858	40.1498	16.0938	14.9574	12.0639	10.0817	17.3079	14.4288	18.3457	10.7863	8.01664	14.0844
1448747_at	Fbxo32	67731	228.292	64.2098	72.7304	567.396	250.793	82.4446	203.891	206.496	243.046	191.742	71.2358	215.233	113.025	13.454	5.26787	7.22296	5.67936	6.37014	7.80468	7.49588
1448754_at	Rbp1	19659	296.747	158.21	122.725	889.013	404.294	258.038	348.823	920.475	466.68	581.137	336.281	491.141	260.229	77.3715	99.7496	11.2457	47.6133	45.5621	15.1407	9.23825
1448826_at	Myh6	17888	960.17	296.021	337.322	1245.44	1833.45	469.611	1173.82	2360.75	1451.04	1714.67	573.222	1031.4	462.289	130.776	41.7663	22.5857	279.563	92.7542	129.986	28.5973
1448873_at	Ocln	18260	13.5968	11.0715	10.7333	50.6288	13.2271	9.42353	23.5869	23.1222	35.9079	28.3145	13.3503	10.378	13.567	9.48019	9.64923	9.1575	9.60598	9.57714	9.77402	9.60476
1448885_at	Rap2b	74012	18.4813	15.7689	9.65165	61.1947	38.0314	19.6076	37.381	35.8114	30.313	33.2306	9.99888	11.9983	17.2737	6.41172	7.82745	7.76685	9.78436	9.72567	10.3088	9.82073
1448893_at	Ncor2	20602	794.182	485.529	836.617	1896.32	1440.73	807.943	1435.72	1342.87	1548.18	1460.94	367.296	705.426	439.572	101.105	89.1097	26.8478	86.5938	41.1008	23.8512	19.958
1448905_at	Nme3	79059	491.199	498.164	406.643	158.515	314.797	335.376	199.485	202.672	130.999	133.672	135.397	92.8252	54.127	104.745	121.737	71.0299	66.1316	86.757	36.9617	40.2806
1448910_at	Pecr	111175	49.7333	25.2796	35.7067	88.6293	71.3183	50.3492	79.4696	78.3358	83.223	87.281	24.5307	53.6874	24.4531	21.7711	8.23257	6.19636	24.5423	8.23432	6.9604	7.7933
1448940_at	Trim21	20821	31.7426	10.2704	11.753	72.6702	40.4252	14.2879	17.399	83.8539	41.6898	59.6557	8.98429	75.7513	18.137	8.71372	8.64221	8.10933	6.77192	4.54016	8.7469	8.62186
1448948_at	Rag1ap1	19729	90.2347	123.96	137.034	92.7472	55.809	118.345	136.32	55.5802	70.6157	77.2615	9.18455	32.4823	8.06694	8.24578	8.11233	7.59887	8.16039	8.05793	8.57129	8.19745
1448965_at	Ino80	68142	75.763	21.5342	14.3707	95.7964	95.5715	64.5467	160.365	65.5666	67.9467	39.5266	6.37561	22.6715	21.5693	48.1292	32.2606	22.1882	6.95216	20.5898	7.25745	6.39676
1448989_a_at	Myo1b	17912	55.1634	47.0091	88.1259	94.1801	39.0355	49.8296	112.016	71.9541	87.9935	98.4283	32.9314	30.1038	12.4106	27.9303	17.8274	18.7927	20.072	14.7071	13.8791	26.2969
1448991_a_at	Ina /// LOC100047943	100047943 /// 226180	78.3879	5.5723	17.3322	82.9525	111.121	7.99095	42.2287	128.159	66.9768	33.9938	5.43253	96.0496	22.8623	6.22675	5.29608	5.22849	4.87895	4.87481	4.90395	5.33911
1448992_at	Ina /// LOC100047943	100047943 /// 226180	33.5789	10.8748	16.4023	47.8175	33.876	15.6601	22.3307	47.2102	38.4932	29.5762	17.6556	49.3007	17.0494	10.0877	11.7532	5.32436	9.63374	7.4423	4.62554	8.59262
1449029_at	Mknk2	17347	50.7898	146.041	226.549	249.502	41.6397	122.185	225.562	40.2368	35.8817	254.965	44.7163	56.4547	68.372	42.2884	44.2175	42.6566	32.8875	41.9049	67.3127	44.113
1449036_at	Rnf128	66889	1033.14	749.706	1740.33	556.846	659.605	714.815	1236.64	536.605	903.043	643.958	106.332	78.1635	103.81	30.4602	31.4185	26.8087	33.559	21.0585	33.3744	33.6588
1449052_a_at	Dnmt3b	13436	2392.86	1508.27	2042.24	4092.19	3545.16	2158.06	3010.68	3502.23	3736.97	3231.38	1299.01	1240.53	850.058	254.818	129.621	69.3274	92.1245	15.8888	20.5228	7.69998
1449061_a_at	Prim1	19075	4156.88	2592.5	4547.98	1698.33	3767.96	1813.16	2447.03	2817.67	1476.35	1014.34	325.223	810.735	323.583	720.006	363.481	143.874	364.745	159.99	145.101	104.273
1449084_s_at	Sh3d19	27059	173.999	52.5138	58.5077	434.926	380.473	107.689	162.02	512.471	289.074	311.8	26.8241	301.634	160.785	49.5071	51.8678	12.4872	45.7738	7.94337	7.88158	7.19363
1449106_at	Gpx3	14778	47.7782	37.7811	70.5038	88.0891	46.5472	29.8473	37.6836	28.3378	44.9591	47.0966	15.1284	13.1688	17.0308	9.14769	8.47652	12.0758	8.44058	4.89002	10.1391	7.96947
1449118_at	Dbt	13171	103.751	73.1692	77.8097	72.09	83.7045	42.715	73.3937	52.9488	24.0317	33.5706	13.958	20.0028	11.7082	12.7289	11.3521	8.34119	12.7316	20.3489	10.7739	12.7132
1449129_a_at	Kcnip3	56461	15.1988	12.5301	12.5516	33.7419	31.5402	18.6806	23.4272	27.749	41.0172	29.7504	29.9096	8.61686	8.01107	6.51854	6.2364	6.52512	10.7099	8.53848	8.63742	8.49346
1449145_a_at	Cav1	12389	117.001	113.959	36.7323	211.275	67.0986	37.2506	91.1568	145.522	15.6988	45.1915	38.0916	145.912	29.8292	35.5424	34.6846	21.6603	68.8026	34.1483	33.8179	13.4333
1449149_at	Traf3	22031	33.5375	25.5264	27.7206	56.6279	37.0764	33.1854	41.3119	64.102	39.6683	60.4031	22.0671	17.5335	14.5886	10.9417	11.1757	10.6601	10.1638	8.77369	11.4467	11.1003
1449254_at	Spp1	20750	7.22583	5.86801	5.66475	14.8177	10.5926	5.56833	10.2576	31.7547	15.8871	22.5217	6.08263	15.4533	6.96203	5.94925	6.09064	5.50748	6.05042	5.74964	6.07874	5.83072
1449283_a_at	Mapk12	29857	13.4839	13.1932	15.6872	51.4204	33.0798	7.98388	11.4382	21.4929	18.2648	30.4699	7.72084	23.5826	9.29318	5.99841	7.44368	6.01325	7.41659	7.3173	8.62719	9.11749
1449289_a_at	B2m	12010	832.594	493.46	342.86	2126.43	448.861	117.236	329.387	324.44	239.03	366.883	74.911	429.744	408.331	218.944	211.407	147.872	189.176	187.393	140.563	87.2511
1449302_at	Abca2	11305	159.629	208.997	289.77	136.445	115.804	360.827	227.392	85.6976	80.3347	126.475	71.4864	42.7028	7.76762	10.3205	6.02592	10.6544	5.13219	8.24834	6.71455	6.78473
1449311_at	Bach1	12013	92.6277	101.676	31.024	125.912	87.6838	128.559	130.54	109.216	50.2662	22.0723	50.8382	27.7446	20.9507	10.2402	5.45059	5.02952	9.2494	5.1496	5.67717	5.43921
1449329_at	Zfp235	56525	22.3306	25.7451	41.7185	29.4003	18.8166	23.1322	20.7669	11.5872	14.7149	11.9475	6.42216	10.4314	9.82066	9.59642	10.3794	9.06494	6.44271	9.23362	5.973	9.83346
1449363_at	Atf3	11910	555.933	295.379	104.711	1009.36	332.121	56.6529	119.638	114.918	27.4411	130.6	40.8278	81.1655	31.6974	35.0998	31.1354	28.7803	54.5714	44.8048	44.3355	42.6897
1449370_at	Sox4	20677	14.4105	19.6436	16.446	65.8165	26.7588	16.8264	60.7708	43.3835	48.5754	50.107	5.88588	13.4178	13.5806	4.81025	6.68383	6.39889	4.75355	5.71153	6.6703	6.56825
1449414_at	Zfp53	24132	37.5062	17.2022	44.7737	42.153	41.6403	16.4944	23.7164	28.1129	13.3202	20.794	13.345	13.0762	8.7804	11.5008	10.1127	8.22322	10.0837	8.98636	9.73807	12.4456
1449440_at	Lpin3	64899	82.8524	125.975	93.9766	71.285	79.8662	91.6769	43.2128	40.0951	26.3832	38.6906	18.0541	30.148	13.4122	14.0126	12.8883	9.16568	30.3514	13.1251	8.3189	16.5876
1449455_at	Hck	15162	55.0239	27.1309	57.6076	47.5921	31.7931	48.9935	82.0589	30.2297	53.7701	58.6042	8.88675	8.66974	8.13978	5.74109	3.52093	3.42073	3.8199	3.80883	3.88383	3.82342
1449470_at	Dlx1	13390	106.765	81.7668	91.9547	452.357	269.147	163.138	457.477	399.376	425.039	359.421	175.169	127.744	81.3199	27.6424	9.7645	15.8165	20.6586	23.1715	9.93407	25.1159
1449475_at	Atp12a	192113	85.3835	30.9073	133.027	94.6748	106.904	104.955	226.943	99.3287	135.247	69.3003	9.256	29.8821	12.9061	8.99589	8.98181	6.17951	8.56846	8.81591	9.08383	9.03158
1449480_at	Sap18	20220	21.9675	42.7849	31.3147	71.6195	31.2009	163.163	145.097	12.1894	88.1284	62.4789	10.0157	8.95098	10.8093	9.73648	9.11157	8.07932	8.88865	11.4708	10.0323	9.2963
1449491_at	Card10	105844	154.391	86.4226	94.48	337.684	374.262	192.52	310.857	413.739	282.342	293.471	106.288	170.132	66.2333	11.9459	9.74415	5.54582	40.8099	12.9591	5.44809	6.6654
1449519_at	Gadd45a	13197	313.682	618.366	867.151	362.654	307.308	577.877	710.295	231.894	566.752	264.833	161.87	54.3361	51.9639	15.5548	13.0913	13.0803	10.9263	10.9441	14.5869	11.6083
1449578_at	Supt16h	114741	138.402	53.4885	22.8985	37.1307	134.245	56.8047	120.088	158.926	26.3748	21.0897	11.923	38.4123	25.7345	52.0662	26.6074	11.1841	8.3953	12.4667	21.7435	12.0978
1449620_s_at	Adcy9	11515	17.2193	12.7548	24.465	30.3322	23.8056	10.9189	32.533	28.4802	44.4828	21.1117	9.73756	12.9464	8.88143	9.69213	9.62359	7.23672	9.56555	8.11939	9.03065	9.58584
1449626_s_at	Acbd4	67131	110.923	85.4108	84.0488	56.1881	54.816	77.0103	47.5618	32.2439	25.0755	19.8572	29.5903	20.2145	15.7212	17.7016	26.448	16.6658	26.1377	17.2873	26.5836	22.2699
1449731_s_at	Nfkbia	18035	485.017	172.673	134.597	582.652	315.31	145.432	242.722	375.88	355.994	356.871	60.3021	171.236	141.944	35.7321	125.245	36.2501	170.595	63.6484	102.531	63.3885
1449750_at	AA407331	106839	24.4596	10.3461	24.5528	8.9349	29.5525	41.8959	18.3333	11.153	16.3004	9.8772	9.88133	10.1213	7.63286	8.69128	8.65182	7.20807	8.30189	9.73694	9.56622	10.1083
1449773_s_at	Gadd45b	17873	189.442	325.354	116.707	543.038	223.867	714.846	866.351	214.192	412.473	541.463	303.837	88.8165	50.1957	45.6762	53.4205	13.2131	48.1197	18.9014	26.5938	11.6829
1449827_at	Acan	11595	12.301	10.538	9.99897	16.843	13.6623	9.0575	19.4553	18.9082	36.5381	15.7352	7.1992	7.97677	8.95901	7.09393	7.18551	8.08329	9.14226	7.11837	7.20751	9.75215
1449839_at	Casp3	12367	64.1683	47.5958	68.9835	41.5688	50.3067	32.3535	32.9008	16.5408	30.588	18.5245	14.921	14.7318	6.66664	6.63833	6.60378	6.02378	6.56432	7.01664	6.96636	6.69223
1449845_a_at	Ephb4	13846	102.597	88.0154	288.178	233.553	152.792	60.3432	437.669	111.877	206.466	223.801	14.6333	24.407	37.5483	16.3472	11.5344	9.1219	9.44864	11.9689	11.7557	11.6013
1449885_at	Tmem47	192216	228.06	140.178	263.554	99.3061	147.778	113.06	195.732	65.7393	51.2008	71.7678	7.3438	18.9079	6.10474	6.32363	6.2343	5.84021	6.21966	6.07974	6.5132	6.31006
1449893_a_at	Lrig1	16206	495.342	519.264	1057.39	709.745	579.687	796.001	889.726	367.266	610.289	484.199	170.598	153.121	111.445	23.9848	29.9859	17.3747	19.7952	16.0559	19.9141	16.3679
1449939_s_at	Dlk1	13386	68.8505	24.335	31.2198	296.509	226.378	83.8088	210.597	225.088	225.441	282.24	62.4634	110.738	55.4748	14.5757	11.1461	8.46353	14.6843	8.87954	8.97634	9.82573
1449949_a_at	Cxadr	13052	71.6536	104.352	159.246	80.2754	42.6209	132.286	89.904	31.6461	35.9764	51.5863	25.0406	24.6483	13.2672	9.86334	19.972	21.6198	24.6898	10.7608	14.7462	14.2181
1449998_at	Nkx3-1	18095	46.5702	24.9068	36.07	175.208	111.049	46.2965	132.498	161.594	112.929	182.899	37.1772	84.1275	56.1853	20.3826	7.89437	19.3604	16.8859	16.8742	17.666	16.9268
1450008_a_at	Ctnnb1	12387	133.445	605.532	1027.29	1134.51	139.958	642.068	906.764	122.459	923.972	931.971	119.193	86.5723	585.721	66.1364	34.7284	114.135	12.4564	39.0563	56.2215	30.6005
1450047_at	Hs6st2	50786	434.208	390.454	476.972	292.626	522.914	523.551	546.348	363.425	246.212	303.899	109.821	87.5156	19.1382	9.3991	15.5114	7.04314	21.4979	7.80254	6.47623	22.7306
1450050_at	Hira	15260	262.009	314.905	93.7772	156.842	238.602	300.902	173.473	137.541	115.671	69.2769	73.6607	43.0193	52.2957	44.296	43.2993	17.0227	11.4887	8.10097	9.01416	8.58625
1450051_at	Atrx	22589	63.4649	87.6381	73.6615	281.524	62.2475	131.52	429.815	47.0109	76.7079	43.0103	22.984	18.6293	8.74099	8.22322	8.36333	6.3164	8.1056	8.29443	6.80912	8.10274
1450056_at	Apc	11789	5.48046	22.2636	62.9396	80.6636	5.58988	42.7749	95.1789	7.99285	113.979	81.4382	5.87807	5.39948	28.8282	5.5731	5.50078	5.2087	5.48193	5.45083	5.65765	5.47374
1450061_at	Enc1	13803	100.074	37.4544	52.5301	352.105	121.951	62.3142	110.965	161.201	124.408	165.466	39.546	171.97	130.749	47.8762	30.5705	29.2946	50.2262	22.8291	26.4017	35.7371
1450067_a_at	1810034K20Rik	67881	486.305	330.171	416.313	141.05	492.174	444.983	348.112	257.336	204.222	152.006	172.395	60.7079	25.5334	17.5218	30.9429	11.6535	13.2369	11.8143	13.0065	11.8718
1450068_at	Baz1b	22385	49.7338	23.2103	14.6964	83.6515	35.9514	68.699	87.2007	71.4608	33.9806	11.4553	25.5515	25.3986	10.99	12.0814	16.4017	10.3914	11.4452	6.61464	6.91815	6.67207
1450069_a_at	Cugbp2	14007	1431.37	807.541	870.176	1918.45	2096.51	1393.02	2176.8	2303.8	1242.89	2313.79	528.559	544.983	396.748	147.76	82.1313	47.7483	90.2253	34.1332	24.8699	40.1561
1450079_at	Nrk	27206	91.1557	31.8399	27.5622	700.039	68.2709	20.2365	36.0056	81.2378	35.895	59.2521	17.2698	36.5867	16.9594	5.51877	17.067	4.98133	17.751	16.9443	18.1815	25.0486
1450090_at	Zfp101	22643	66.7988	91.3919	157.103	77.6985	35.7992	140.33	127.705	30.8797	49.9831	41.7642	17.8287	24.2969	24.6435	14.7375	17.4409	21.0112	7.33658	14.3316	14.9426	18.8075
1450105_at	Adam10	11487	8.77739	23.7631	165.804	199.246	4.92682	30.0042	209.753	4.72146	14.3712	155.927	4.96714	4.51215	4.39206	4.7919	4.71108	4.28968	4.79967	4.7467	4.94159	4.81974
1450129_a_at	Socs6	54607	95.4321	277.864	593.321	474.094	111.864	312.577	650.064	113.144	519.928	460.414	62.3431	31.6842	64.6157	7.68881	5.05314	12.1027	3.58598	4.99699	3.82346	5.36629
1450173_at	Ripk2	192656	188.233	245.625	330.832	207.495	155.323	205.158	210.129	102.245	146.954	172.098	64.5443	41.5071	14.0906	11.828	11.721	11.4005	12.0387	11.6443	11.876	11.6927
1450191_a_at	Sox13	20668	139.242	37.2138	44.8291	212.326	194.904	42.2849	94.3056	156.823	167.96	132.001	47.3106	179.641	68.7801	47.8482	16.1316	15.7401	30.7234	17.5979	15.0989	8.34389
1450236_at	Foxo3	56484	42.5197	43.5743	31.5664	108.099	37.8752	52.4872	83.8091	56.213	98.9188	72.7649	32.2527	35.2439	31.7952	30.1092	21.801	26.3884	31.5931	31.7039	32.3045	31.4836
1450253_a_at	Map3k4	26407	128.521	445.739	645.176	400.465	139.301	638.282	378.827	121.286	232.079	424.953	198.379	132.49	198.429	59.8531	48.5268	52.8558	10.2506	26.7327	54.7012	24.7586
1450336_at	Setd1a	233904	22.0288	30.3681	12.26	26.21	28.5453	71.7265	46.7412	34.4472	21.237	10.5934	17.8078	11.3949	10.4012	12.2278	11.6776	10.2417	11.6932	11.5943	12.3316	11.7767
1450339_a_at	Bcl11b	58208	59.6963	51.504	42.1095	54.9376	88.1889	69.1613	58.2172	26.4853	25.5468	37.7183	10.0276	12.759	7.23053	7.46777	7.38182	7.00888	6.69423	7.64877	7.55165	7.96889
1450387_s_at	Ak3l1 /// LOC100047616	100047616 /// 11639	622.324	326.568	451.94	1003.37	784.577	414.276	706.659	757.482	606.78	702.952	212.929	289.146	220.81	76.4497	61.3003	66.2239	18.4089	37.1523	46.5527	10.4838
1450397_at	Mtap1b	17755	156.482	63.739	48.5414	257.56	194.563	133.808	305.043	196.505	244.749	169.438	37.9705	73.7489	38.9811	36.6756	32.296	17.44	29.8301	23.5199	24.758	14.8999
1450400_at	Tgs1	116940	238.804	326.795	553.786	425.295	206.014	345.084	645.485	180.87	329.732	348.783	53.8857	79.9943	64.3487	14.6608	9.45792	14.1138	10.6459	9.93874	22.0249	32.1166
1450414_at	Pdgfb	18591	144.024	76.4147	99.1803	169.374	129.905	82.9485	151.047	141.538	198.597	148.17	67.5341	68.8847	30.069	7.32322	7.05652	6.89831	7.02107	7.17367	7.34758	7.24637
1450422_a_at	Kdelc1	72050	21.6874	43.6728	63.9782	63.2949	8.97674	40.6919	36.0871	23.6719	21.7478	19.124	13.0255	12.867	11.6252	8.51844	8.10324	7.41734	7.60237	7.32611	7.46098	9.01404
1450461_at	Tcf7	21414	7.67591	20.537	58.9771	131.703	6.58948	15.3499	85.9231	7.14248	12.0477	131.524	35.7735	7.10099	14.3431	6.8934	7.21459	6.8866	10.9333	7.15242	14.8983	6.55821
1450478_a_at	Ptpn12	19248	84.007	481.85	1069.7	918.278	98.5859	639.286	1070.49	65.8739	1147.01	1164.65	102.853	86.9246	205.892	38.4609	33.4167	104.953	19.8181	19.8089	32.9775	21.3943
1450522_a_at	H1f0	14958	57.1391	77.4841	75.5079	27.8337	29.7753	56.3706	55.5541	18.3054	16.3468	16.5676	13.3821	8.6438	8.56705	9.42177	8.28441	8.49077	7.21117	6.43639	3.70783	4.30037
1450537_at	Mid2	23947	24.6931	12.0956	37.5878	10.9297	34.2343	28.7625	30.4327	24.8047	13.6505	10.3942	7.83	5.63257	6.77866	6.95597	6.69116	5.53035	6.8378	7.17894	7.38734	6.82045
1450542_s_at	Magea1 /// Magea2 /// Magea3 /// Magea5 /// Magea6 /// Magea8	17137 /// 17138 /// 17139 /// 17141 /// 17142 /// 17144	182.98	208.72	610.999	326.886	177.225	212.618	413.703	221.611	411.385	458.41	105.688	71.677	125.085	26.0304	10.3791	12.9208	6.393	8.69004	33.7172	21.4457
1450555_at	Tex13	83555	7272.04	6111.2	10247.9	4933.36	6685.56	6149.36	7314.82	4696.01	5454	3907.79	1633.56	785.956	549.597	176.41	101.756	57.8112	147.255	78.6327	79.7591	39.938
1450629_at	Lima1	65970	62.5521	21.275	18.5473	254.276	68.1893	33.1891	81.1654	141.168	74.3505	169.305	19.1089	104.068	27.8248	15.5526	22.9551	14.3006	20.5539	14.1196	15.645	18.6774
1450641_at	Vim	22352	388.755	660.998	326.026	3260.49	240.096	513.904	1193.17	511.814	199.804	729.669	201.753	583.4	226.475	74.0861	183.058	51.2674	206.315	94.5614	167.545	136.916
1450644_at	Zfp36l1	12192	2855.4	1984.46	1591.07	3505.22	2868.49	2267.37	2784.42	1993.37	1111.11	1316.26	618.904	643.367	386.308	145.742	133.971	103.551	493.647	509.824	459.615	337.829
1450661_x_at	Nfic	18029	20.3678	11.3659	11.2864	48.7981	30.321	16.3553	90.4353	13.6487	15.2962	11.084	11.3644	13.3436	10.6802	11.2188	11.3911	10.4794	11.357	10.6406	11.7908	10.9959
1450692_at	Kif4	16571	359.739	252.983	650.984	212.305	392.106	573.836	512.394	380.948	437.285	380.879	109.972	78.8516	29.4215	12.4729	11.304	10.1172	15.9928	16.9235	15.3471	14.7678
1450710_at	Jarid2	16468	941.475	847.147	1907.19	2747.57	1424.68	1552.67	3040.89	1314.44	3483.83	3352.37	973.602	431.114	853.519	85.329	61.8752	146.213	258.221	274.167	355.225	154.518
1450716_at	Adamts1	11504	56.3808	88.9834	43.5859	647.237	25.8309	108.944	200.21	74.7541	41.6591	166.744	35.5331	66.6682	44.013	16.506	18.5658	23.294	27.0935	25.1031	36.6067	35.7332
1450718_at	Sh2b2	23921	52.17	19.4197	47.1784	78.7615	82.5922	37.8367	103.668	56.6013	57.5433	80.0864	10.7668	11.0645	7.40991	6.44982	6.64077	6.17842	6.90284	6.52661	6.89179	7.85513
1450744_at	Ell2	192657	980.667	656.092	1234.58	272.161	708.09	475.416	552.363	370.596	260.541	277.042	67.8062	80.6704	46.8344	45.9733	41.4188	23.661	155.951	128.741	87.6633	95.5234
1450840_a_at	Rpl39	67248	22091.2	20510.7	21355.2	11601.3	15473.6	15745.4	10901.6	13251.4	6508.08	6200.3	7364.65	4937.45	1026.19	602.595	1551.26	301.196	1942.69	538.469	410.498	740.18
1450846_at	Bzw1	66882	1192.09	5129.25	4875.3	5819.89	664.885	2037.75	4702.87	761.435	4812.48	5526.39	1042.88	315.266	1620.03	99.7864	85.1551	451.791	109.538	471.998	938.444	829.013
1450881_s_at	Gpr137b	83924	47.4699	15.0459	29.571	61.7971	51.2179	12.2045	20.97	42.6361	17.4775	30.3387	4.82224	21.0099	6.83839	4.29608	4.39447	6.76466	4.54946	4.23667	4.31295	4.36619
1450882_s_at	Gpr137b /// Gpr137b-ps /// LOC100044979	100044979 /// 664862 /// 83924	49.114	43.2453	44.1435	80.8601	58.3525	47.6728	61.1684	76.9245	60.5538	67.1585	11.7709	13.3615	9.77877	7.95577	6.99809	7.84382	6.21834	7.97286	9.79331	7.9597
1450918_s_at	Src	20779	108.706	46.694	39.2753	169.127	197.417	79.6336	139.753	237.435	148.585	179.866	90.0682	169.621	60.4131	41.6091	67.0892	14.976	70.1995	80.4632	32.6258	55.088
1450931_at	Dock9	105445	178.321	124.803	364.663	557.116	282.085	132.76	455.137	211.315	619.834	602.738	38.9451	67.2151	63.9648	10.937	7.54003	6.76121	9.09327	8.91217	10.4778	10.3795
1450932_s_at	Dock9	105445	883.174	636.547	1041.79	1546.19	1218.11	890.61	1688.15	1172.92	1749.08	1630.22	363.759	422.996	291.606	51.1523	22.0465	8.2573	32.1874	33.739	22.0203	10.1063
1450958_at	Tm4sf1	17112	15.4053	62.2586	6.64204	291.778	6.11431	68.9623	259.516	66.348	6.84591	137.982	8.00362	85.0716	8.31389	5.90056	18.0402	6.48727	6.90152	6.31664	6.33666	4.44669
1450971_at	Gadd45b	17873	299.825	787.62	278.795	1428.28	334.702	2108.5	2389.95	525.83	757.955	1081.04	888.032	198.038	143.053	44.8061	70.9745	64.3719	87.1982	128.078	54.549	30.5951
1450976_at	Ndrg1	17988	60.3431	96.1475	105.078	193.622	65.184	59.516	212.442	81.1862	219.963	150.494	74.013	58.0185	56.2014	17.6718	13.0289	14.1247	17.9159	12.6903	14.5427	27.3459
1450981_at	Cnn2	12798	205.27	219.955	203.992	325.167	200.048	120.838	274.115	102.635	91.8035	133.08	28.9396	49.9874	31.3824	20.4465	18.7519	14.5106	19.8749	17.5243	20.3147	38.7351
1451099_at	Mbc2	23943	17.4204	33.5361	47.0472	91.5559	17.6497	22.9239	42.161	16.851	9.02637	19.1639	8.58424	11.3544	7.4723	8.0815	7.86969	6.88353	20.3559	7.81399	7.91234	7.9299
1451115_at	Pias3	229615	160.46	193.83	322.451	69.6874	127.436	141.276	209.224	53.163	74.2752	79.6087	36.3526	20.0778	13.9364	14.662	16.935	14.5391	7.91505	7.01237	6.55656	7.55996
1451127_at	AW146242	232023	131.174	102.464	331.608	206.818	95.6506	106.725	192.442	105.993	214.217	206.355	11.0178	31.5367	28.5885	7.11071	5.51421	6.91186	5.69309	5.47881	7.19608	8.66499
1451150_at	Zfp410	52708	300.375	346.525	585.659	198.257	295.802	251.019	332.984	131.962	260.347	158.932	76.7531	113.768	90.7778	127.563	97.5605	58.4288	32.6136	50.6793	28.8361	8.64163
1451151_s_at	Zfp410	52708	1188.57	976.477	1722.16	613.798	1012.02	1025.61	999.069	545.749	669.26	526.437	287.289	311.95	234.431	310.701	234.328	172.109	56.3882	66.4103	82.5971	67.2045
1451154_a_at	Cugbp2	14007	714.379	328.548	549.883	1221.24	1258.37	529.895	1039.93	1185.13	748.099	1405.47	243.462	391.633	214.333	83.6858	68.198	17.0116	42.7505	14.7876	21.1357	16.4524
1451190_a_at	Sbk1	104175	2128.95	696.961	1299.09	1687.26	2999.5	632.126	1476.43	2575.52	1353.59	1480.58	397.29	1131.96	557.061	239.695	99.3522	17.2473	104.594	7.64822	6.02773	13.7996
1451230_a_at	Wbp5	22381	2301.59	1967.24	1985.96	1946.2	1329.34	1337.77	1367.79	1223.24	678.065	818.281	753.386	534.626	195.409	75.6071	229.687	64.2743	384.404	73.5609	85.3327	133.482
1451246_s_at	Aurkb	20877	286.438	228.027	353.545	308.548	487.749	390.513	572.937	448.762	526.4	640.031	186.779	168.153	75.6703	52.6849	89.4293	169.732	83.8364	125.55	129.653	167.15
1451310_a_at	Ctsl	13039	1595	3042.79	3627.83	4423.68	1381.33	4973.31	2986.34	2092.73	7758.32	3928.66	4504.32	1549.93	3528.87	306.755	868.465	729.714	878.178	929.079	663.03	136.74
1451313_a_at	1110067D22Rik	216551	306.789	88.804	149.048	410.315	538.63	145.618	315.17	516.856	238.076	372.721	66.0119	166.722	67.3829	29.9379	13.288	7.02958	17.2665	7.59557	8.90926	7.9571
1451315_at	Tmem101	76547	359.321	222.208	304.187	301.74	431.25	348.524	343.249	414.512	575.705	297.589	256.864	578.797	1382.99	388.47	262.255	350.901	48.9483	32.349	26.3271	14.1684
1451331_at	Ppp1r1b	19049	43.223	32.283	55.8019	21.3302	35.3616	31.4391	52.8658	13.059	22.7621	42.5283	13.8243	7.34534	7.64331	7.42343	7.40928	6.92774	7.65512	7.42186	8.45111	7.64313
1451338_at	Nisch	64652	74.637	86.4172	125.605	31.4679	63.1228	61.1115	64.2978	36.8574	64.1741	36.1653	13.6153	12.9581	13.1435	8.84098	11.1989	10.7382	11.1503	8.41055	6.37532	10.7169
1451345_at	Mtap	66902	33.9104	88.3528	206.362	231.376	49.9768	79.9023	220.767	24.2669	173.725	145.496	13.6135	28.5266	33.9704	5.78819	5.84296	6.51496	5.68941	5.74578	6.04534	4.13214
1451348_at	Depdc6	97998	39.3202	18.0693	67.3814	27.8288	36.4168	26.606	50.3837	11.9079	27.7218	31.4326	13.1977	9.58502	8.79107	9.80621	9.69852	7.81062	10.1243	9.54294	9.91701	9.63945
1451383_a_at	Chuk	12675	853.663	983.248	1353.49	954.72	972.019	1794	1621.16	637.515	1156.32	865.662	263.248	161.577	297.084	130.81	77.7969	61.6309	43.5973	47.5582	46.1494	46.3873
1451417_at	Brca1	12189	23.8431	152.403	267.23	296.446	23.6639	91.5973	162.826	15.5896	160.318	154.68	16.5575	14.9437	18.3138	6.40022	6.04566	13.8446	15.2037	37.5081	21.7464	12.8622
1451447_at	Cuedc1	103841	68.7279	69.3701	70.4835	64.1158	81.308	104.691	95.8504	29.3522	68.3795	41.0367	18.7683	17.8005	18.91	18.0068	18.0084	18.856	17.8769	17.9814	35.6945	19.1147
1451456_at	6430706D22Rik	381280	209.642	219.601	64.5454	131.571	254.258	428.862	186.832	114.535	67.1325	39.8361	97.2388	49.2774	55.9584	50.7651	33.2168	57.5355	18.3575	41.1259	13.9356	75.9706
1451461_a_at	Aldoc	11676	713.817	334.847	245.228	1349.89	1244.67	497.487	750.196	1408.27	920.598	1110.44	484.612	1016.45	368.785	122.433	101.028	36.3727	111.464	39.7069	26.6621	5.30036
1451463_at	Prr5	109270	126.055	68.9907	107.227	186.546	225.181	114.617	168.149	258.235	173.679	218.065	51.842	85.4921	23.8595	6.29652	7.47016	5.39407	11.5305	6.09403	8.16244	6.51065
1451475_at	Plxnd1	67784	307.689	281.524	300.01	783.646	540.139	300.917	583.981	600.88	572.723	620.045	227.783	195.55	126.602	35.8391	15.4242	10.0676	29.7228	22.1604	20.158	6.18568
1451499_at	Cadps2	320405	679.315	433.234	644.013	406.412	802.464	403.65	663.085	409.163	222.222	340.301	81.3722	93.2745	38.943	43.2901	36.407	35.7258	37.9866	41.2484	19.8875	48.8302
1451516_at	Rhebl1	69159	68.1147	43.4844	47.25	308.62	79.2855	46.5098	92.6679	138.294	193.395	203.723	92.9351	129.116	93.6137	22.9028	14.1731	21.2621	41.0951	79.2462	106.265	54.8992
1451525_at	Arhgap12	75415	763.473	615.937	1081.15	501.787	672.741	613.779	757.92	442.101	502.723	317.22	126.885	106.507	49.7035	21.9044	44.165	14.676	17.336	10.5006	12.9614	11.4223
1451532_s_at	Steap1	70358	419.437	385.45	573.09	177.47	332.661	449.282	334.328	174.784	221.594	199.059	97.8156	83.6426	101.249	39.746	56.1992	57.991	96.8367	93.6947	80.1937	74.1528
1451560_at	Prr12	233210	151.553	160.148	221.193	128.487	208.082	108.233	208.005	97.4478	74.8368	90.3449	56.1502	35.6999	35.3866	30.3875	30.1338	29.4104	29.1052	29.9653	37.3619	36.2115
1451561_at	Prr12	233210	158.71	43.8573	92.2049	155.085	385.183	104.445	170.673	177.063	156.248	126.817	41.3446	60.3835	35.0027	35.7662	37.3819	35.8201	35.9008	35.39	36.0609	35.0722
1451574_at	Bcl9	77578	93.9273	98.7384	167.435	170.482	91.5795	142.335	255.914	170.261	258.771	150.818	55.025	54.4216	48.0639	20.6794	14.3047	9.36096	14.2594	10.9472	11.0799	10.7478
1451583_a_at	Mmgt2	216829	13.1116	7.45311	7.45533	36.9761	18.4893	7.38191	14.1554	26.659	24.5517	19.1302	7.57417	15.7383	7.41911	5.97741	6.14622	5.68451	5.78902	5.73699	6.12697	5.83075
1451601_a_at	Spns2	216892	107.125	90.5619	100.782	208.035	144.045	123.315	179.431	189.469	193.742	172.778	57.8656	74.2037	26.9352	28.2138	25.538	21.3822	44.1044	40.4728	29.3027	62.7266
1451602_at	Snx6	72183	526.74	183.643	239.524	546.174	886.26	497.911	839.024	1404.68	804.723	929.682	358.436	474.713	142.602	106.079	53.0548	9.22889	31.6316	8.98221	15.5602	16.9732
1451611_at	Pla2g16	225845	27.4078	10.4151	31.0138	18.8146	28.6084	24.7326	33.8831	22.9459	19.1163	26.5892	9.18809	9.89305	9.65296	6.41742	9.06058	5.99356	6.32522	5.40732	8.72402	10.614
1451641_at	Dbr1	83703	804.781	657.355	1165.34	287.495	652.549	584.868	657.029	554.343	406.623	367.625	144.473	114.168	75.6031	86.0478	49.043	24.5119	28.2456	17.7682	16.7034	26.3483
1451797_at	Smg5	229512	70.6906	109.095	115.354	108.477	53.0323	213.369	178.756	53.5243	41.2654	93.7257	46.0121	40.1489	38.3869	30.88	13.693	40.7088	10.7581	10.664	15.1946	16.2935
1451803_a_at	Vegfb	22340	278.095	292.611	369.979	231.022	273.254	247.58	444.368	145.067	125.643	191.5	84.5398	56.7048	32.8133	35.0907	49.5466	18.2765	30.5141	29.9689	29.572	34.7679
1451828_a_at	Acsl4	50790	257.883	238.349	379.605	140.959	166.697	194.025	226.085	113.103	128.828	101.721	30.4568	28.5317	11.1664	7.30648	5.60058	5.28389	8.04707	8.82435	7.31032	7.46848
1451870_a_at	Brd4	57261	8.86846	21.1227	8.05647	74.5088	44.155	32.2823	73.8067	8.15301	28.8315	21.7632	9.03433	7.3764	8.13244	5.91551	7.78807	7.38032	5.55991	5.71642	5.78953	9.03106
1451887_at	Lrba	80877	24.9406	12.8961	9.41423	10.5777	68.3621	57.4134	11.3116	20.5675	19.6249	15.5957	17.4315	12.5715	9.70544	12.6945	12.4712	11.1658	12.8216	12.1806	13.1813	25.6553
1451895_a_at	Dhcr24	74754	350.246	285.045	457.576	736.481	594.149	446.656	694.555	481.895	797.793	662.033	155.247	187.299	138.792	26.2373	17.1785	14.103	20.2961	10.6242	7.3221	7.05534
1451927_a_at	Mapk14	26416	49.3089	27.5268	84.049	14.4889	26.8839	29.4588	83.4446	12.864	52.6445	22.5723	9.03108	7.50545	7.10408	7.87946	8.08486	6.95305	7.96152	8.06888	8.4015	8.57566
1451936_a_at	Txnrd2	26462	13.0105	53.3723	72.065	22.8413	12.0642	41.0861	59.1808	11.6773	27.0591	43.4687	22.4542	6.41189	6.88086	12.9505	10.3202	7.09521	7.3523	7.28063	5.97282	6.86138
1452007_at	Vamp7	20955	264.279	180.582	259.507	205.273	268.451	109.863	242.1	294.558	114.805	221.306	66.6874	47.1707	27.2215	12.6536	10.0092	8.91151	9.97828	9.60213	10.3265	10.8533
1452021_a_at	Hes6	55927	24.7777	73.7437	101.76	32.6091	16.8892	72.463	71.3265	18.9111	26.2369	55.91	24.9564	9.9988	9.91876	9.63903	9.57251	9.05088	9.47364	9.51848	9.6766	9.53317
1452073_at	6720460F02Rik	109212	20.1326	20.001	37.1534	30.1309	36.1917	28.6969	83.57	42.4518	99.2913	74.981	21.3714	20.9693	20.6288	12.7291	11.8571	7.5459	10.5181	15.3678	8.12436	11.8221
1452077_at	Ddx3y	26900	378.842	326.375	282.774	182.432	217.257	229.923	239.942	132.72	95.0499	88.6053	90.2128	13.6424	14.5939	8.76818	7.67537	5.73832	10.9354	17.1048	7.87217	7.39395
1452105_a_at	Tsc2	22084	339.738	418.425	891.232	876.091	488.699	596.027	959.964	444.603	915.692	843.865	283.484	262.577	262.971	140.491	116	78.9625	27.6447	74.8402	62.6588	36.5248
1452106_at	Npnt	114249	51.5209	31.4337	98.9772	118.639	48.1815	36.0905	137.56	52.8842	133.291	107.868	12.4034	25.4383	32.1672	12.2587	12.1716	11.4208	17.4727	11.8553	12.6855	12.0206
1452107_s_at	Npnt	114249	82.7942	44.7339	110.909	72.7917	70.6231	51.1887	26.2941	70.1523	69.4508	45.1006	23.8564	24.6233	13.7004	13.6399	16.196	11.0984	14.1291	12.7478	14.7529	16.233
1452141_a_at	Sepp1	20363	1198.56	590.533	276.08	2732.35	792.449	254.818	507.118	871.932	200.856	711.812	313.703	597.96	118.079	50.4764	268.959	46.372	717.567	296.617	171.005	316.54
1452146_a_at	Cox15	226139	71.7929	34.8878	99.9009	61.7038	88.2603	35.1969	85.6088	94.6419	100.938	120.49	44.6371	57.6606	42.6152	46.5006	40.5188	21.0337	26.1091	8.02474	14.1232	38.9538
1452154_at	Iars	105148	1563.65	651.362	2333.92	2789.15	1921.5	934.844	2863.18	1570.94	2950.26	2562.66	449.52	1176.69	1025.85	741.597	627.417	423.975	344.223	220.457	396.529	386.58
1452175_at	1810026J23Rik	69773	94.1456	164.229	228.476	194.186	90.3942	130.078	183.666	76.6189	127.618	141.785	28.7769	29.5926	54.2237	11.0329	10.9568	27.2089	10.8659	10.8429	5.36192	10.8701
1452180_at	Phf17	269424	441.271	419.709	329.029	616.608	362.893	507.384	577.31	161.041	376.732	360.787	131.381	70.2832	58.5017	19.5936	21.2328	23.5886	24.278	18.5225	19.261	37.9593
1452246_at	Ostf1	20409	341.856	422.223	794.237	380.879	196.685	312.599	470.14	176.802	335.503	241.774	162.744	61.6283	47.9326	36.7769	31.2558	17.1011	11.1232	7.34516	9.45642	15.943
1452268_at	Fam76b	72826	218.772	329.836	822.962	401.141	162.131	359.848	451.615	150.241	278.514	321.62	154.641	110.124	173.539	110.753	78.9415	131.141	50.5365	152.885	140.165	126.146
1452291_at	Arap2	212285	80.6474	119.534	225.096	183.417	129.721	147.253	211.985	95.3021	169.156	131.149	31.1454	38.2232	17.9342	6.65254	11.6922	7.68733	9.04547	8.18638	7.5013	9.24427
1452314_at	Kif11	16551	273.674	195.654	326.513	239.303	462.798	426.201	697.926	468.2	464.114	415.665	188.304	120.918	132.976	86.5117	43.152	109.309	26.2327	69.728	65.4111	16.1773
1452318_a_at	Hspa1b	15511	1086.16	731.311	805.028	1287.68	1619.96	1182.34	1715.29	1288.68	1104.28	1415.47	365.697	394.292	191.162	69.2305	47.6035	43.3976	87.8773	26.3102	27.0261	22.6276
1452340_at	Zfp518b	100515	728.558	731.493	1215.48	1400.49	1120.2	898.153	1597.53	1053.51	1738.41	1847.95	467.774	435.036	320.551	80.6495	21.7594	24.2126	21.105	9.8123	10.7547	15.4831
1452341_at	Echs1	93747	46.8923	166.612	285.488	188.264	45.8482	100.752	167.541	27.0691	151.513	125.556	51.0941	23.6883	41.5785	6.23508	8.71878	5.89813	6.12689	7.68364	12.7117	6.15391
1452342_at	Apbb2	11787	37.4559	8.79925	20.6331	60.9914	37.1368	18.7789	40.0401	42.764	29.1967	31.1855	6.39918	8.27292	5.86938	4.11526	4.07067	5.6113	5.90886	5.62512	4.15118	5.78473
1452346_at	B3gnt1	108902	18.8807	18.4986	23.2605	55.9002	27.8786	19.6655	57.2665	31.3859	81.7292	51.1784	14.3774	10.5644	14.581	21.1668	16.2357	17.841	9.98406	21.6445	12.8015	10.6164
1452351_at	Parp4	328417	27.4109	17.0886	38.9702	46.5214	28.9378	9.6033	28.8542	6.42128	29.373	18.0625	7.2981	9.362	6.4132	6.34867	6.22871	5.79446	6.55286	6.12763	6.45048	6.22521
1452360_a_at	Kdm5a	214899	2294.2	1692.87	774.21	1999.09	2724.38	2670.53	3129.34	2036.06	2374.16	770.633	932.882	787.257	847.819	449.567	301.272	148.278	228.392	340.822	144.132	175.181
1452361_at	Rnf20	109331	89.5994	39.2998	11.1353	27.2006	112.888	60.1284	85.777	48.1288	21.6995	13.4701	22.8713	10.6829	10.8104	26.0476	10.8883	10.3939	11.6369	10.7513	11.0481	8.86291
1452364_at	Suz12	52615	415.781	828.404	964.203	1343.57	417.29	1038.23	1816.32	349.698	586.75	966.192	318.657	115.33	205.615	109.009	80.0114	150.115	28.0149	201.127	150.404	334.935
1452377_at	Mll1	214162	328.344	595.338	1007.48	851.567	488.977	1000.18	956.103	251.074	861.584	592.587	101.396	144.049	143.474	29.0286	16.6479	37.8601	17.046	20.1129	13.2526	19.4827
1452379_at	Auts2	319974	106.883	38.0589	52.6347	110.913	232.011	119.559	126.217	192.057	64.1436	54.4397	21.3176	64.0771	30.3684	28.9149	28.8873	12.0682	22.7591	6.04438	19.8573	15.9768
1452381_at	Creb3l2	208647	25.3469	26.9914	69.4343	56.925	30.9875	17.7088	40.5243	13.3802	25.2486	24.4955	4.9795	12.2919	8.92816	5.63586	5.61543	4.46647	4.81132	4.76577	5.33026	5.59373
1452388_at	Hspa1a	193740	70.7341	16.1696	26.9882	170.948	81.1249	21.7339	101.399	74.4593	111.148	94.9606	11.7799	33.237	22.0518	9.66028	10.5767	3.41132	16.012	13.1987	14.0246	13.0903
1452416_at	Il6ra	16194	147.759	100.625	33.434	148.021	230.544	218.404	263.176	186.286	125.857	115.999	76.6399	16.6678	18.5256	12.2286	16.7741	13.4321	25.4546	13.1231	13.9822	32.2544
1452428_a_at	B2m	12010	631.371	406.458	323.261	1808.54	268.689	124.101	265.206	238.068	205.41	285.297	131.124	374.87	423.057	143.886	217.843	142.019	102.891	144.478	131.775	68.7225
1452430_s_at	LOC100048559 /// Sfrs1	100048559 /// 110809	1440.43	1179.89	2448.72	3371.97	1651.21	1939.68	4231.34	1207.7	2485.9	4620.46	636.044	391.026	866.509	155.867	133.938	454.284	161.465	331.017	358.524	265.547
1452438_s_at	LOC100046932 /// Taf4a	100046932 /// 228980	1221.26	1716.71	3105.05	1607.93	977.785	1736.34	2271.6	645.786	1849.49	1482.15	424.157	234.884	446.319	433.468	186.998	205.58	36.2702	50.3269	45.4629	20.3076
1452458_s_at	Ppil5	69706	1420.8	1053.52	1206.68	886.653	1341.68	1125.76	1143.59	868.44	527.846	574.948	369.454	265.029	87.0662	83.7555	72.768	9.36567	33.5519	6.59681	5.84039	3.98419
1452459_at	Aspm	12316	236.193	100.39	179.463	188.629	367.624	277.499	580.217	306.082	396.949	93.2948	92.3325	99.7927	98.4066	103.017	68.3398	29.1068	42.2969	40.8618	17.2914	77.4539
1452462_a_at	Banp	53325	122.58	81.4308	132.588	132.942	243.796	389.577	267.737	268.581	410.437	215.969	162.916	106.948	88.4098	63.4395	50.4447	43.0082	34.4592	45.2224	34.9217	34.7904
1452506_a_at	Ilkap	67444	696.049	1154.71	2681.69	1532.36	602.092	1273.49	1864.72	469.212	2120.46	1064.17	356.144	294.16	490.361	122.198	85.9031	88.3886	29.5681	35.807	55.9994	19.0615
1452514_a_at	Kit	16590	1454.6	1574.57	2886.47	2244.67	1971.26	2525.52	3836.51	1567.36	4777.88	3867.44	873.058	409.09	522.61	59.8548	28.0798	36.3004	28.1899	28.1018	28.6404	11.3208
1452517_at	Plekhh1	211945	12.0959	52.7942	111.252	50.5166	37.3509	22.4748	75.8428	16.8474	21.223	21.4172	10.7587	11.0975	10.1461	10.3173	10.2223	9.64361	10.1523	9.77515	10.5727	10.2229
1452519_a_at	Zfp36	22695	845.375	364.003	313.68	1856.18	562.388	131.26	387.519	343.672	194.218	324.323	16.397	270.373	97.3815	50.5524	89.8063	29.6919	158.725	41.2539	75.4427	107.95
1452542_x_at	Tcfe2a	21423	22.3017	123.462	155.525	164.619	38.878	133.305	165.106	28.8763	23.1561	117.255	17.5854	12.9246	16.926	6.5263	6.41245	5.78354	6.1869	5.94831	6.35356	6.1758
1452545_a_at	Itgb1	16412	188.783	455.856	806.265	939.364	213.902	651.932	797.248	201.048	648.679	833.05	178.458	86.4497	154.207	7.41075	11.7396	18.429	4.49889	11.0049	15.1764	13.5658
1452589_at	Ptk7	71461	284.367	355.763	446.247	439.486	343.894	321.237	532.544	194.64	172.227	366.335	104.955	61.5733	58.0665	11.6373	14.914	8.62005	6.14484	13.1513	15.2531	14.0345
1452606_at	Mnd1	76915	25.3022	9.0221	11.4783	32.7061	15.8693	11.2348	11.2313	38.8279	48.124	18.9305	8.91696	20.5542	11.6295	12.3743	7.63228	6.23372	4.72784	6.82268	7.47656	7.58739
1452650_at	Trim62	67525	48.3608	24.9768	73.8309	127.582	86.0401	39.2896	99.2596	90.0625	120.613	101.791	42.9076	24.317	17.8246	10.087	9.92982	7.97221	42.4483	31.5605	26.8148	13.7305
1452670_at	Myl9	98932	207.046	221.719	159.211	949.722	163.728	62.8768	106.401	300.167	134.315	240.151	58.1421	540.806	438.198	61.8417	131.023	41.3875	135.014	40.6126	200.479	53.6952
1452682_at	Fam122b	78755	23.2617	15.6239	66.9327	30.1657	17.3818	7.2035	24.8053	22.9167	23.421	19.1539	11.4424	6.05129	4.1938	4.26085	4.41067	3.977	6.11948	4.14481	4.25802	4.19833
1452688_at	Prpf39	328110	22.9106	17.9666	17.2134	43.3235	8.77432	31.9746	72.0103	15.4896	12.3817	35.1589	8.2358	5.77216	7.95675	8.14805	5.98869	7.49251	4.64086	4.59075	4.81577	4.63095
1452750_at	5530601H04Rik	71445	76.0417	39.5195	94.0447	126.318	65.4931	48.3979	97.2211	112.177	54.3837	94.7455	10.5883	30.815	13.6962	8.20264	5.61272	5.30651	8.08238	7.96677	8.7411	8.09392
1452769_at	Rnf145	74315	997.14	869.021	1099.28	2382.47	1395.67	1299.95	1804.75	1549.46	2727.46	1998.12	826.874	802.188	961.479	493.461	347.451	374.672	114.543	207.725	160.687	106.348
1452784_at	Itgav	16410	434.859	300.627	523.054	172.592	290.929	295.853	221.765	115.004	82.7156	66.5952	86.5369	44.7006	18.6032	7.91935	34.7346	11.6611	85.5034	49.153	30.0105	39.875
1452812_at	Lphn1	330814	671.301	392.776	521.481	792.285	1028.48	876.562	1152.64	717.921	692.969	816.446	196.998	250.109	175.186	15.1603	15.3213	12.5347	29.0416	14.8352	13.2242	12.9277
1452830_s_at	Cad	69719	2968.1	1495.86	1891.67	3237.3	4539.76	2620.73	3507.95	4026.82	3289.23	3320.34	1412.11	1669.66	820.77	331.73	199.47	51.5171	107.58	32.2617	37.4272	30.6067
1452885_at	Sfrs2ip	72193	896.225	870.451	301.171	1422.62	1212.56	1280.83	2049.7	1212	789.401	337.001	607.442	313.093	269.868	66.8411	54.0701	13.7669	26.9581	13.8902	15.7922	11.162
1452893_s_at	Enho	69638	13.5488	11.9001	12.0504	43.3502	15.8301	19.1685	27.7289	35.7966	16.8015	31.737	11.9527	15.6788	9.17031	6.68822	5.11596	10.1599	5.50269	4.90314	6.97772	5.24046
1452898_at	Vps36	70160	175.923	127.666	203.503	49.1865	137.673	138.546	136.677	109.967	95.8231	67.4312	22.4347	36.4389	34.6767	35.875	28.2964	19.9881	23.9896	22.1205	23.2669	22.5435
1452913_at	Pcp4l1	66425	8.92844	9.41646	7.44453	121.187	7.86415	6.8155	50.1695	17.8568	13.3341	51.9329	7.04004	29.9939	17.5932	4.24016	6.98339	4.62494	7.10452	4.1206	7.04272	7.0898
1452924_at	Fam83d	71878	186.741	182.587	312.948	245.244	324.149	438.097	654.432	324.926	712.171	604.556	197.729	113.488	156.715	66.3153	95.1271	143.454	33.0971	98.5324	74.6275	113.944
1452954_at	Ube2c	68612	1451.28	1497.16	2187.08	1934.06	2608.17	3825.8	5972.44	3167.9	4798.49	5466.48	3329.63	1330.19	1402.61	486.039	697.879	1063.1	745.613	1866.49	2123.12	1820.37
1452958_at	Asphd2	72898	57.5858	26.4275	25.5735	264.19	112.421	37.2515	89.2524	150.15	84.2103	169.493	62.5566	135.969	54.821	15.3133	12.5392	14.7584	15.1212	15.0611	15.33	15.1465
1452968_at	Cthrc1	68588	10.9207	9.02837	5.78446	79.3656	24.9992	8.7308	36.8616	36.5541	26.7756	33.5242	9.13375	14.168	18.9869	6.62927	6.25507	5.69407	6.02703	5.83826	6.32549	6.4769
1452987_at	Taf1d	75316	40.9739	28.7443	19.1353	19.2939	36.7844	90.1771	85.1869	20.5873	56.8827	18.2933	14.7593	12.9307	21.5422	13.5041	13.1125	14.2301	12.8854	12.5079	14.0435	13.4706
1452995_at	Nudt17	78373	125.804	182.53	220.644	17.3394	56.3945	206.361	26.3773	33.03	30.4349	13.951	26.8382	18.3569	18.6501	19.0744	19.0961	17.5261	13.1908	18.5838	12.2831	15.6524
1453015_at	4933407C03Rik	74440	196.647	58.1595	68.4233	626.887	440.874	74.6692	160.945	416.784	314.315	222.478	46.6197	363.686	220.577	20.6243	43.7275	20.052	54.1979	18.728	16.4856	20.537
1453040_at	Mcart6	67062	187.288	66.5766	148.232	94.6485	179.099	79.3958	157.846	222.05	152.953	88.7173	43.1401	48.4827	21.5713	21.3779	13.2146	25.6739	18.5701	21.4706	24.0594	17.3288
1453077_a_at	Snapc3	77634	119.926	161.234	469.57	443.568	128.913	247.605	519.868	131.188	502.32	389.899	71.0939	119.9	198.199	127.922	138.593	87.4937	19.8966	50.8279	49.3464	29.7514
1453125_at	Sox11	20666	188.913	171.49	221.599	140.305	248.953	221.745	252.159	138.329	196.265	157.233	13.5448	18.5542	13.5077	7.91476	7.1174	6.80791	7.21761	5.12198	5.4135	9.39496
1453140_at	9030612M13Rik	208292	156.346	120.386	99.1778	48.6431	157.972	172.467	76.1311	82.3059	136.879	35.672	40.8581	26.3655	27.6319	15.7306	12.8873	25.3647	8.75621	4.59559	6.55425	18.9835
1453181_x_at	Plscr1	22038	49.7582	76.9432	104.352	70.8321	43.8434	36.8047	55.9971	33.2678	25.7651	35.0831	16.9743	11.2912	11.3076	11.947	11.7395	10.5008	11.763	12.3228	12.4071	15.2031
1453196_a_at	Oasl2	23962	59.4032	10.0588	11.0785	185.164	113.416	8.76937	31.5955	121.815	71.6239	103.332	15.4209	152.678	67.6623	10.7849	8.92934	7.20031	14.481	5.31872	5.64962	5.45604
1453269_at	Unc5b	107449	151.29	45.6394	43.8475	77.721	189.673	114.576	173.394	133.705	129.438	84.132	24.1875	19.9447	14.3543	6.56036	4.78543	5.25318	4.88503	5.65801	13.6158	15.1579
1453277_at	3021401N23Rik	70680	28.8283	18.4607	35.076	70.2767	24.9743	13.9903	18.6611	35.6272	63.372	49.5527	19.1027	18.2093	18.4606	12.1064	12.1475	34.1123	7.74073	8.58975	18.0744	7.97926
1453282_at	Cxadr	13052	53.4255	67.9778	163.815	81.3769	45.7208	55.7664	97.8181	35.0632	56.3675	74.2017	11.5984	8.92845	9.53578	8.72294	7.55213	7.43962	7.52154	8.31115	8.95725	8.9826
1453290_at	Hmgxb4	70823	279.802	123.831	47.0026	174.346	300.602	199.229	209.788	265.564	142.961	62.5836	26.945	104.591	91.0205	73.4826	29.5355	28.635	29.6624	19.3494	15.9696	7.7146
1453304_s_at	Ly6e	17069	128.727	145.931	121.627	470.456	81.2615	51.0517	202.019	116.562	37.4498	134.581	11.2905	94.9179	11.7818	6.73715	22.6028	9.98157	59.7709	21.2272	9.7865	12.7024
1453307_a_at	Anapc5	59008	26.3254	167.809	150.809	219.968	26.845	171.273	130.201	26.5788	22.709	192.901	36.8045	20.158	22.146	12.0746	9.92178	23.3756	7.3306	18.4857	14.2819	9.79266
1453332_at	2410002O22Rik /// LOC100044479	100044479 /// 66975	38.0314	16.3712	47.0359	20.3085	45.0327	19.8617	28.7462	28.6632	28.7882	11.0489	7.48615	11.0667	6.33176	6.52673	6.47416	5.78412	6.48743	6.26949	6.64683	6.58074
1453359_at	Exosc1	66583	33.7369	45.7788	57.5214	49.5945	61.1823	140.669	74.7422	30.3479	85.4145	29.8514	24.8143	19.0559	52.3486	17.4093	12.1694	29.2037	10.3393	8.98253	10.6422	10.3003
1453361_at	Hells	15201	297.599	294.501	416.479	165.812	339.036	490.808	225.746	241.095	386.859	97.43	77.4126	66.6487	78.3632	15.756	27.6583	53.0408	21.6374	22.6049	16.1081	30.7542
1453369_a_at	Fundc1	72018	172.106	188.979	259.542	187.811	80.1863	153.288	157.891	105.058	87.3701	85.9519	64.9852	33.0545	15.4683	19.8836	20.4876	15.7904	24.5681	14.5161	20.3737	18.8966
1453416_at	Gas2l3	237436	25.1559	9.70693	13.7093	23.1674	54.6187	12.3828	44.0393	68.9078	52.8341	36.0613	15.7503	42.1399	12.135	11.5832	9.74697	10.8868	8.21669	8.29223	8.61846	8.5126
1453433_at	Wdr89	72338	61.6013	90.6871	98.4593	73.6258	51.5251	53.2819	46.3481	37.8274	34.6898	38.147	28.5884	17.6773	10.2198	6.8589	5.96147	8.57404	8.55932	9.90566	10.8315	10.4821
1453534_at	2810004I08Rik	69932	12.0371	10.8456	19.2812	68.8573	25.0275	10.133	18.9056	35.9526	32.4721	29.6484	11.4391	28.5605	10.7388	8.01254	4.86989	3.50805	4.52222	7.88521	4.18802	7.95688
1453562_a_at	Nmral1	67824	46.7757	56.8791	83.9791	128.907	77.0577	66.092	107.522	120.019	139.204	94.7672	73.6923	41.7318	41.8751	36.2881	19.6078	17.074	33.2203	19.178	29.6005	20.8998
1453571_at	Depdc6	97998	102.519	91.3872	93.7088	61.0863	124.729	100.553	68.4241	85.0351	25.4348	18.8219	56.893	23.4792	11.5391	11.7255	11.6095	10.4381	12.0602	11.5278	11.431	10.5244
1453572_a_at	Plp2	18824	389.38	447.077	708.854	327.842	291.569	435.283	460.539	221.006	267.599	222.796	100.398	69.1609	27.8965	6.06449	7.46827	10.8738	14.5626	6.59586	6.92019	12.0454
1453583_at	Zzef1	195018	41.524	31.1222	93.7571	18.5109	70.4985	117.671	49.0271	34.7364	71.8681	27.0739	20.2792	17.908	31.2034	10.0512	10.9606	18.3958	20.7329	15.1541	7.44734	15.0314
1453599_at	Trim71	636931	1516.13	360.407	572.405	2470.39	2733.61	812.516	1683.54	3045.54	2629.49	1990.96	335.372	1592.31	1077.01	209.613	64.7502	75.0591	47.306	4.14027	37.3962	12.0724
1453636_at	Pcgf5	76073	78.4133	25.1222	33.025	150.526	175.824	131.674	132.673	163.927	180.743	85.0282	44.9857	72.6999	28.5293	17.5113	16.8014	16.6417	19.5229	16.7589	16.8767	43.4205
1453709_at	Grit	330914	57.6706	42.1689	102.327	28.1349	74.6875	76.9996	97.3374	40.3484	80.6508	28.231	25.2486	49.8737	15.1052	14.2667	7.90624	14.2534	7.72937	12.4678	11.6296	18.2778
1453737_at	Wipf2	68524	182.204	161.969	349.068	270.837	220.944	157.434	387.875	182.293	297.58	392.137	79.9795	77.2034	69.4053	20.6979	47.4702	45.5065	12.0048	20.21	14.8531	32.3936
1453849_s_at	Hnrnpab	15384	4675.44	6540.49	11862.9	15789.5	5247.13	8640.66	16095.9	5299.33	14276.7	13159.4	4143.8	3485.34	3872.83	1702.57	1583.11	1850.46	2221.94	2410.39	3034.54	3019.28
1453915_a_at	Slc37a3	72144	33.9197	27.9279	66.3725	40.8132	40.2516	25.3538	30.1537	18.0839	26.3259	15.2532	13.956	14.5735	16.0656	12.4588	6.11404	12.9199	13.9667	8.6806	12.6568	12.2308
1454008_at	Prmt3	71974	99.8201	85.753	89.1358	36.2353	102.337	103.53	107.078	104.122	63.8557	60.3783	6.84157	5.73747	5.73277	5.78961	5.77568	5.26045	5.69972	5.66466	5.8355	5.68812
1454011_a_at	Rpa2	19891	213.636	1332.24	2647.87	2455.33	192.953	1235.75	1744.18	171.352	657.59	1687.39	372.133	56.7808	537.001	57.2438	29.3612	160.717	14.8705	40.8702	90.5108	57.1098
1454030_at	Saps3	52036	24.7124	24.1101	26.5878	22.8986	34.501	102.886	63.2446	26.8486	21.9183	11.8031	10.1692	5.83916	24.3319	7.99436	11.2973	25.3413	5.79813	15.7131	9.52842	9.19607
1454311_at	---	---	28.4789	21.0087	50.0327	11.0093	47.9785	62.0655	21.4514	19.6978	41.2881	12.5545	16.3612	11.443	12.8134	9.01039	8.36473	11.216	8.94326	11.7573	9.49981	12.9649
1454343_at	6430710M23Rik	76214	22.4476	29.9587	27.9408	16.4186	22.5174	68.1921	37.2823	11.658	21.6513	9.99748	13.7658	6.79896	12.0947	5.59527	4.10953	10.057	4.59333	3.96967	5.65774	7.0031
1454454_at	---	---	198.437	103.907	33.816	57.7565	124.587	102.14	88.5971	103.175	42.7736	28.7217	5.39741	9.20291	5.02794	5.17517	3.62395	25.7717	4.2447	5.02111	7.55	5.33369
1454609_x_at	6430527G18Rik	238330	652.11	573.594	529.747	1456.41	1126.65	936.848	1354.19	1097.49	1621.92	1184.16	566.25	489.909	520.813	116.711	77.1948	44.5841	67.0174	73.2794	84.9855	80.9498
1454632_at	6330442E10Rik	268567	25.5194	13.5421	16.5782	66.0265	31.6487	17.9878	34.8287	59.4817	38.3416	50.1102	14.0126	31.9357	16.5718	12.3739	12.3122	8.99567	12.6161	12.4669	13.2898	13.3862
1454659_at	Dctd	320685	224.436	130.244	152.629	565.258	316.551	167.362	250.263	283.596	336.382	323.222	46.1807	249.497	129.699	16.6962	9.57295	33.8443	8.98426	6.00934	8.07302	7.33029
1454667_at	Snx8	231834	459.334	351.007	383.366	312.38	423.053	380.082	274.741	313.107	142.263	223.462	130.103	138.449	31.3125	16.1107	8.79369	5.13177	9.8416	5.21192	8.90083	5.23398
1454681_at	Esrp1	207920	785.595	616.815	853.038	1550.57	1196.96	875.139	1421.08	1043.93	1216.85	1438.69	305.094	446.146	239.071	48.9009	26.6553	12.4502	46.6367	24.9761	21.7758	7.26666
1454731_at	Myo10	17909	145.713	347.997	471.956	750.356	192.203	431.397	720.002	237.523	539.213	752.642	195.229	130.737	165.077	38.9774	73.5847	91.8027	38.7999	55.3039	95.9572	117.583
1454736_at	Ankrd57	268301	130.299	205.77	220.192	107.508	111.533	77.5539	121.535	62.998	60.738	69.675	56.9312	44.8954	18.9237	36.7327	53.37	36.8998	48.1876	15.1214	28.3533	28.5367
1454737_at	Dusp9	75590	724.408	497.549	657.691	1027.82	1265.42	719.439	1420.9	1528.39	1572.03	807.943	576.462	410.543	227.257	71.5031	13.9537	6.34416	14.2477	7.99477	7.57191	7.3161
1454741_s_at	Tmem164	209497	16.5571	6.42601	9.82613	48.3723	9.98822	9.67901	17.777	24.0523	21.9087	26.3967	9.56862	22.3462	8.38743	9.11762	9.30695	7.88542	9.07155	9.84791	9.34539	8.03664
1454769_at	Tatdn2	381801	661.144	1402.68	238.191	385.745	833.019	1208.08	526.347	628.879	261.574	280.617	807.93	187.718	133.208	222.508	125.024	67.591	141.856	267.129	84.8674	44.3829
1454783_at	Il13ra1	16164	17.6467	11.4682	12.3649	34.6342	31.8554	10.7877	24.8571	34.0235	31.2031	25.7851	9.41184	13.5114	9.69854	9.3362	9.23023	7.24567	11.3646	9.14804	12.1979	9.18648
1454795_at	Cobll1	319876	191.018	129.834	252.553	305.776	229.377	131.837	298.592	230.374	191.763	283.357	81.0516	77.0125	29.4773	24.401	13.8628	10.0783	20.5004	19.6956	13.5358	36.6336
1454806_at	Fam49a	76820	61.6405	13.6224	46.8158	46.386	82.2633	25.6814	85.6056	62.4247	88.0816	59.5651	21.6054	20.6934	10.7361	13.8504	11.045	10.1009	14.5711	10.8226	11.5482	12.6327
1454810_s_at	Vps8	209018	433.886	172.523	327.616	359.041	472.486	360.701	368.788	451.88	351.587	335.059	147.247	148.781	88.8284	96.7551	61.2239	40.2203	62.7767	39.0693	30.9762	34.4047
1454866_s_at	Clic6	209195	245.137	66.7022	75.6551	661.152	553.108	146.444	210.411	557.173	263.269	304.228	93.2614	375.249	151.651	31.92	14.9455	42.0016	24.1948	6.70422	7.01679	6.55774
1454867_at	Mn1	433938	15.4436	6.80996	9.52605	51.2472	42.2743	8.25311	9.50467	35.971	27.3126	12.0381	5.4367	8.57437	8.50092	5.34769	5.29821	8.71821	8.218	5.23297	7.5458	5.26793
1454877_at	Sertad4	214791	1367.94	757.82	970.624	2662.39	2242.05	1207.53	2250.84	2775.27	2329.98	2538.29	699.067	1143.89	542.319	159.036	59.9022	18.172	91.5552	27.6365	9.96671	40.5684
1454880_s_at	Bmf	171543	83.0894	37.8132	41.9829	64.4259	106.583	41.4084	70.7765	126.643	72.2303	88.4661	42.8723	57.0847	14.2675	15.7636	16.247	16.6638	24.823	11.6587	17.6681	35.0936
1454890_at	Amot	27494	193.643	36.0973	111.186	309.925	237.265	99.6936	119.36	266.222	203.929	221.377	29.1914	246.361	57.7405	20.9107	53.0195	17.7719	51.8582	13.7083	14.3393	6.97419
1454946_at	Mybl2	17865	118.482	190.773	383.324	298.488	104.996	130.485	197.108	86.8842	93.127	125.309	87.3033	95.7802	75.5247	62.6897	35.6123	46.3371	27.0395	54.2135	37.4129	23.1201
1454960_at	Smad3	17127	156.818	32.7971	70.8256	265.005	234.335	68.4404	98.139	289.308	168.983	199.332	60.1455	192.786	80.0156	23.932	28.1333	17.2947	31.9082	14.858	10.5031	8.12369
1454974_at	Ntn1	18208	25.2715	22.822	23.6699	135.851	51.1687	28.2087	67.5057	38.7559	57.8897	70.6778	20.4255	23.7943	24.3252	20.3759	16.8685	22.9413	22.9549	22.9205	25.4839	23.9918
1454976_at	Sod2	20656	52.1932	28.3489	33.4195	71.1643	48.2847	22.4019	37.6191	73.5899	74.2553	52.0035	29.4201	29.6304	23.1864	29.0685	16.0129	7.0422	7.51612	8.26789	7.94571	7.55509
1454995_at	Ddah1	69219	44.228	21.4966	20.8994	163.316	83.2399	38.7627	62.8044	130.96	110.061	117.485	33.2496	90.4827	51.5448	11.5815	22.4395	14.8981	17.7496	6.95132	15.96	8.5207
1455007_s_at	Gpt2	108682	30.3203	38.7926	34.7866	141.092	37.3829	28.4356	46.886	57.0389	64.5215	98.8466	37.0094	41.9067	30.3322	11.5129	17.8787	17.9141	14.4816	18.8452	19.3876	27.2045
1455034_at	Nr4a2	18227	65.1555	128.126	166.643	395.48	38.9747	40.0393	92.9801	43.3303	49.2997	78.3658	26.3091	32.9258	40.2347	10.3074	9.48008	34.2954	11.2235	8.84719	43.2901	39.5075
1455040_s_at	Nhsl2	621083	25.2996	12.5089	47.8035	24.3384	36.3495	31.4981	44.5732	20.7041	39.0076	21.4124	10.4873	8.98153	8.82558	9.43411	8.96925	7.72413	9.28141	9.01794	9.88546	9.63938
1455048_at	Igsf3	78908	712.018	244.314	351.254	1393.08	1173.23	461.344	717.591	1238.52	1258.8	1103.19	321.797	681.922	418.38	74.9644	40.214	40.8044	108.378	154.602	164.453	49.3312
1455049_at	Igsf3	78908	195.613	59.9551	60.5917	439.744	365.972	179.132	316.148	364.916	342.742	313.946	73.2378	109.436	110.607	13.166	4.54835	8.0536	20.369	40.9744	41.651	8.9625
1455080_at	Ppp1r16b	228852	31.7682	45.9368	52.223	56.055	58.2995	63.331	113.354	41.9838	73.2461	45.9882	13.0822	18.0016	11.56	11.0116	11.6955	12.0675	13.071	11.3852	11.4606	18.4015
1455091_at	3222402P14Rik	235542	222.093	134.429	390.774	191.117	262.792	206.723	358.961	175.85	401.528	212.014	15.4158	57.467	20.8655	12.8117	12.3898	11.394	28.2909	17.579	13.9634	11.3381
1455111_at	Yipf6	77929	664.469	401.145	791.154	291.3	587.242	497.894	704.403	354.555	353.072	393.848	88.1883	73.9874	21.8418	10.09	13.1417	6.98455	12.2655	9.66229	10.5957	29.8404
1455114_at	Ccno	218630	83.6342	49.6288	76.7461	176.559	132.214	115.048	222.313	144.67	190.892	218.28	40.2404	54.6646	39.5203	38.3296	32.1571	38.525	55.0164	37.796	37.1563	32.3344
1455121_at	Lcor	212391	266.851	234.847	681.04	435.164	368.604	270.91	518.428	343.098	580.519	471.587	122.359	113.251	60.8842	19.1707	13.1617	19.2982	11.5096	12.6906	22.1088	22.1306
1455137_at	Rapgef5	217944	20.8221	11.1421	18.2472	49.4701	26.1735	23.6673	24.4236	52.2618	39.2486	43.6459	3.72528	31.3917	13.0476	5.54246	11.3904	6.46993	12.6252	15.4611	7.4544	7.44355
1455154_at	Gli3	14634	300.618	156.365	352.769	580	450.4	260.211	447.391	385.129	484.402	418.499	50.5293	120.989	137.616	26.8515	9.99816	25.2101	16.9142	5.94351	14.6226	26.3342
1455172_at	AU020094	105596	47.6685	22.251	19.3775	97.6535	83.2503	38.0187	62.6558	134.945	114.082	118.552	18.1733	42.3373	17.6461	11.7084	12.2573	6.68169	12.5381	10.2817	8.80141	9.34567
1455180_at	Gcom1	102371	14.6095	13.5034	17.364	53.6563	34.3306	15.5184	37.537	18.7648	42.1814	68.8762	14.5759	15.9255	12.4735	11.3647	12.5697	8.60868	9.33806	9.18617	12.8966	7.24111
1455182_at	Kif1b	16561	126.11	96.7261	260.539	118.389	154.842	141.68	196.475	152.545	144.493	131.498	25.89	26.7536	15.7233	16.4687	13.8148	14.4698	16.2004	13.5481	12.1373	11.969
1455206_at	---	---	231.574	163.32	248.329	153.632	207.975	200.761	189.844	113.72	111.148	104.437	17.7848	39.7593	7.17523	7.56392	8.7658	5.64301	21.7131	6.75575	4.6098	5.25068
1455230_at	---	---	14.6529	12.8109	11.8655	61.0221	23.5225	10.9959	36.1057	32.8818	57.5044	36.2293	12.1941	22.7463	11.4962	11.4785	11.731	11.3238	11.69	11.3834	12.1856	11.215
1455269_a_at	Coro1a	12721	147.262	93.5982	82.3383	151.31	77.8214	17.6087	17.7647	41.9983	18.3782	17.6004	19.2707	32.9063	13.4104	17.5434	18.396	6.72456	19.2248	6.7833	15.8426	18.2979
1455333_at	Tns3	319939	272.938	95.7404	117.268	756.78	474.485	180.718	330.833	508.586	547.651	543.982	117.632	468.748	204.99	50.2688	46.6792	16.3115	54.8543	6.45317	16.0896	16.2508
1455345_at	Phf15	76901	412.462	216.778	267.084	546.934	883.757	463.277	516.096	673.953	563.929	545.019	241.529	191.657	123.797	41.2035	11.2996	5.05786	22.4566	5.14579	5.16416	7.46655
1455388_at	Pcmtd1	319263	151.009	175.898	146.115	146.03	187.029	210.365	187.216	111.7	78.3368	90.795	17.6635	35.9816	13.3185	7.23508	21.8076	6.51443	13.8676	5.46948	6.26212	57.3731
1455397_at	Caskin1	268932	221.243	71.9916	174.813	106.967	150.757	87.0306	283.661	132.011	124.415	143.753	41.2646	38.8922	36.3514	36.8322	40.3076	25.7794	36.6555	27.2569	35.724	27.621
1455400_at	Ddah1	69219	23.5101	4.22083	9.94857	64.4717	68.9758	15.9293	36.9969	95.5729	57.8324	59.3293	10.0579	51.5907	23.5213	4.68919	7.26121	4.62163	8.74202	4.77116	3.09039	3.62848
1455409_at	Spire1	68166	62.3212	40.9306	103.112	28.4256	64.6662	52.9052	75.767	82.6464	54.4969	37.0823	9.56175	21.8738	11.9749	8.88845	9.27856	12.1388	11.5046	10.3284	13.174	12.074
1455419_at	D630045J12Rik	330286	93.7095	16.6918	67.4902	100.511	192.007	97.9587	111.603	203.508	116.465	112.166	52.507	81.2627	25.6449	12.0601	17.4295	6.52868	13.9042	6.45505	7.22829	7.00363
1455434_a_at	Ktn1	16709	77.4748	39.5947	67.6154	130.518	89.994	71.6717	65.5779	129.767	192.961	96.3377	114.338	207.446	292.833	57.4088	37.2234	27.4492	25.8637	13.8464	10.3734	10.0565
1455447_at	D430019H16Rik	268595	11.6247	9.35149	10.0019	67.8738	10.2138	9.8522	36.1506	13.5352	53.9543	29.4044	9.83312	11.9036	19.1428	8.90116	9.51002	8.96666	7.67105	9.16066	9.5362	9.45673
1455468_at	Dpy19l3	233115	20.7692	11.8417	52.7298	13.4527	32.001	19.1986	35.6206	28.8426	51.7232	16.8189	12.311	11.2441	11.9361	6.32466	6.05982	5.86981	11.8139	5.681	6.12207	9.03522
1455470_x_at	Lasp1	16796	134.524	39.0651	64.5552	213.57	164.357	44.4596	89.115	239.316	175.177	163.929	55.2925	144.517	54.929	77.9298	94.638	28.4876	61.465	49.2611	42.7299	57.9714
1455474_at	D6Wsu116e	28006	17.4817	47.2242	149.607	119.822	23.4678	107.525	105.213	21.1338	101.303	43.4498	12.4796	20.9688	20.2539	6.61691	10.7449	22.0632	6.74442	10.2281	11.6303	13.6223
1455481_at	Ids	15931	445.487	332.705	570.505	391.111	498.743	510.77	453.143	345.51	372.187	281.91	46.0684	50.2119	11.6323	6.23544	7.53124	3.16359	8.3987	3.22606	3.28737	3.17511
1455513_at	Taf1	270627	1853.44	1345.94	2810.29	3911.12	2399.59	1696.54	3686.93	1968.44	2279.23	2321.9	381.051	635.58	448.969	97.6923	55.7751	21.8993	46.8475	10.4382	20.6801	66.1402
1455523_at	Cstf2	108062	16.5764	10.7902	21.584	13.3147	26.3225	10.5605	41.3678	33.4689	15.9191	21.9908	8.91601	8.63515	6.10228	7.11615	7.01124	6.56121	6.98042	5.57653	8.81551	8.74196
1455529_at	Mex3a	72640	271.101	298.793	388.104	529.131	416.743	308.098	499.324	385.045	599.483	550.586	148.505	168.808	116.646	22.0648	13.2735	8.14212	14.8367	9.39216	10.5353	12.3047
1455547_at	Zc3h7b	20286	395.686	298.623	234.328	671.355	563.985	327.857	498.215	552.398	592.74	450.608	185.934	240.637	189.218	55.3491	60.6111	19.7933	78.2245	16.5186	12.8044	15.6719
1455553_at	Tmem194b	227094	25.3187	33.0314	49.4383	24.6495	14.2848	18.6058	19.4502	9.54181	10.2153	11.5567	8.41152	7.54506	4.17042	4.77263	5.061	4.48229	6.7671	10.0801	8.4314	9.39421
1455570_x_at	Cnn3 /// LOC100047856	100047856 /// 71994	432.949	107.152	116.758	515.123	452.295	121.695	279.184	567.214	275.811	438.803	37.212	357.327	76.8267	41.9331	17.8113	7.98789	29.0709	7.17218	8.80006	10.8
1455665_at	LOC631639 /// Lonrf1	244421 /// 631639	1464.46	946.559	1329.31	2078.11	1924.23	1231.02	2127.48	1953.78	2050.03	2157.65	641.624	774.817	550.828	448.173	441.197	288.971	180.312	103.907	86.4201	79.2459
1455667_at	Preb	50907	25.1807	9.77717	62.5709	27.4744	22.1296	23.6819	58.7724	15.2718	37.3375	32.2385	5.6764	6.33085	6.68675	5.8782	5.67745	5.33066	4.59275	4.55231	4.67675	4.51799
1455682_at	Abl2	11352	563.768	404.898	143.759	484.606	771.008	621.71	592.84	703.058	421.331	196.319	165.888	225.092	116.788	179.797	88.2204	60.2355	59.528	57.8846	19.0763	52.2492
1455694_at	Nbeal2	235627	80.8657	107.455	158.489	57.8298	95.3613	161.712	129.778	56.4724	73.8658	67.2155	23.7302	8.24644	9.67351	5.00317	6.51861	6.04232	4.88549	5.48224	6.60209	6.17067
1455697_at	---	---	62.4295	29.4018	36.7223	110.054	124.866	57.7596	96.6803	129.76	98.463	88.7352	16.9628	28.9306	26.7476	16.3796	11.4142	20.113	45.639	26.3575	31.5447	22.3991
1455710_x_at	Mtcp1	17763	25.1851	12.091	21.5376	28.0885	30.3831	12.9684	22.044	53.6574	26.4541	16.8463	12.794	12.6478	12.5302	4.8509	7.52178	4.30037	4.76671	4.21099	4.80664	5.21385
1455719_at	Tubb5	22154	173.333	32.6533	49.8257	293.372	260.298	65.5165	154.9	236.41	124.183	125.736	65.4414	116.671	45.3568	17.6309	37.6738	22.8783	56.6219	8.84694	5.43849	15.6711
1455727_at	Zrsr2	22184	2638.81	1980.12	2977.51	4965.94	3853.47	3455.8	5092.86	4702.8	5437.94	5124.06	2020.92	1971.24	1124.86	248.628	118.524	54.6832	105.571	21.7556	30.812	19.0173
1455735_at	Ap1s3	252903	178.308	118.51	252.742	46.5736	138.505	56.9119	114.219	65.7322	52.7004	32.6562	12.0657	12.4094	4.24337	4.35011	4.43445	4.03684	10.2779	4.32808	4.67772	11.1135
1455741_a_at	Ece1	230857	974.984	497.136	728.016	981.668	1051.65	605.217	795.766	971.046	848.894	900.882	235.063	310.756	211.493	67.3049	52.7182	18.1389	62.9864	53.3201	14.8581	14.4754
1455765_a_at	Abcc8	20927	64.599	34.8214	53.9196	196.742	102.694	95.8022	148.232	119.743	178.79	212.571	42.4632	88.6811	60.2708	42.479	32.4894	32.1565	31.2861	25.2199	32.615	33.0929
1455778_at	Zfp192	93681	76.7852	37.9938	79.934	140.981	119.195	44.3946	81.3509	124.798	83.9604	73.4817	33.4722	58.925	16.5348	10.0474	7.89338	3.35117	13.9537	11.1378	11.5126	4.28194
1455790_at	E2f2	242705	112.525	95.3799	170.944	63.0751	72.0597	49.7747	75.202	11.8645	25.8927	9.05916	8.12154	5.00668	4.243	4.4884	5.05157	8.5046	5.18367	4.01296	4.64334	6.77209
1455826_a_at	Bace1	23821	37.4855	76.309	26.3859	28.5621	56.912	147.366	34.4705	22.7495	19.302	18.267	27.0239	10.244	8.84189	13.7471	20.0303	13.7865	11.5619	10.8152	9.41174	14.7176
1455854_a_at	Ssh1	231637	417.423	75.6174	75.8964	537.233	617.678	132.509	178.462	567.604	316.041	270.702	25.6955	540.083	142.507	29.0353	57.6071	13.3814	119.647	7.7934	8.98447	4.53586
1455863_at	Spata5l1	214616	40.6388	62.0222	58.2161	21.3103	38.3567	13.538	24.3857	25.3447	21.3851	18.6331	19.8488	10.5133	9.49766	11.4669	9.95008	9.61612	14.3067	13.1296	10.7442	14.9055
1455893_at	Rspo2	239405	30.3094	10.4848	12.109	41.8081	66.6259	24.0224	45.5508	68.6628	66.702	55.9676	15.8238	34.408	11.6451	3.73178	4.45334	4.3531	4.43369	4.42158	4.5136	4.43715
1455899_x_at	Socs3	12702	435.982	338.893	167.711	1572.35	362.119	144.433	315.33	456.085	129.059	294.162	168.462	410.849	50.4931	45.073	69.2863	22.5002	151.278	80.6561	42.7858	49.8097
1455904_at	Gas5	14455	79.1766	97.9965	118.183	267.586	97.8363	397.442	401.397	109.705	187.467	219.082	74.2889	59.7632	25.9066	62.8815	79.0288	65.1374	18.4892	12.6193	13.0975	5.45066
1455956_x_at	Ccnd2	12444	309.378	80.6115	54.6547	591.03	605.908	100.35	193.492	855.052	284.513	280.307	133.599	458.883	231.346	90.3225	53.0039	20.2409	70.5172	12.7073	33.352	10.1925
1455980_a_at	Gas2l3	237436	56.2948	10.5811	13.8366	36.1933	93.4359	32.6445	80.3022	112.049	115.198	77.3226	12.0216	42.8426	19.7318	23.4562	16.8674	10.1913	8.72419	14.6303	8.97542	29.0661
1456005_a_at	Bcl2l11	12125	191.346	79.9327	107.095	145.631	277.245	163.23	257.646	211.145	115.142	129.825	16.7348	50.6793	16.1389	5.79987	5.92284	17.126	5.791	6.06566	7.96375	9.16338
1456014_s_at	Fermt3	108101	160.006	59.7236	57.3831	85.4328	83.3997	15.1928	26.068	7.62163	20.654	7.74509	7.82632	8.63161	7.21549	7.63553	7.4376	6.8397	16.9992	7.49281	9.16188	7.41616
1456036_x_at	Gsto1	14873	212.455	70.5128	75.3005	288.801	395.061	136.477	230.613	419.449	171.951	223.308	105.13	190.2	63.884	27.6805	21.5702	11.2731	37.7316	19.1786	13.3633	12.3496
1456041_at	Snx16	74718	1152.08	709.245	1089.45	383.695	913.381	588.94	678.745	606.079	382.465	286.881	170.64	83.6023	40.8119	22.6269	27.4187	7.62663	19.1293	8.03746	9.95195	19.0575
1456063_at	Fam120c	207375	71.059	92.0654	144.9	107.084	52.9246	47.9521	64.7485	29.1674	38.7308	38.8857	5.20037	5.90316	5.05253	5.01074	4.7535	4.7446	5.06885	5.00844	5.14932	5.16564
1456088_at	Xiap	11798	122.661	98.3285	51.994	94.6271	93.0415	134.236	158.318	74.4728	24.5742	27.2646	30.72	17.5592	8.80485	11.7892	8.32345	8.63052	11.7919	7.70639	9.56661	14.346
1456094_at	Usp36	72344	254.675	110.076	61.7371	260.285	321.367	206.186	276.418	159.084	145.907	85.4541	50.5254	91.02	77.4375	39.8075	17.7654	6.38947	19.8005	6.98398	18.2933	9.42653
1456110_at	Ankrd11	77087	740.085	414.264	232.263	2609.23	1076.17	764.342	2602.31	925.425	999.152	522.192	253.994	488.867	346.366	311.104	373.871	137.066	192.664	143.792	66.3299	260.219
1456120_at	Secisbp2l	70354	92.3036	50.6406	17.8951	12.1371	76.9961	59.038	29.1146	74.4648	29.4131	6.33146	13.2492	12.6579	6.92954	12.8547	7.42516	5.40354	6.14847	5.5283	5.55006	4.20872
1456201_at	4632427E13Rik	666737	55.3379	54.084	51.8305	52.3677	93.5713	128.951	125.797	54.3771	167.532	46.4223	113.152	27.0036	169.291	16.1748	6.68542	23.2276	6.37881	6.4218	6.37128	8.34572
1456232_at	Gmeb1	56809	25.4876	45.3387	23.6269	46.0442	34.6262	82.1678	53.5727	19.2872	41.2418	18.0459	19.4186	7.67525	16.9392	7.69481	7.62197	12.494	16.9971	12.9145	17.2691	19.0988
1456256_at	Eif5	217869	354.284	404.015	191.795	330.979	331.334	1146.84	815.665	278.471	303.609	227.606	188.05	93.7068	160.663	72.5566	41.4639	77.2463	54.8407	85.471	35.4182	38.6379
1456281_at	Fbxl18	231863	76.1797	109.056	76.3489	63.6757	89.812	88.9665	72.7335	65.705	36.7433	46.3438	24.9563	21.5882	12.4731	6.94136	9.53555	6.1814	5.9232	6.3022	7.52675	6.28691
1456307_s_at	Adcy7	11513	154.264	82.3749	81.9849	331.936	120.521	40.9194	35.155	59.6319	26.6871	27.1924	27.4244	27.1346	9.82573	7.23961	5.99802	11.8157	38.5235	19.1844	27.5613	17.5794
1456329_at	Prtg	235472	270.944	80.3958	87.8179	665.486	482.942	188.619	333.56	612.52	581.582	537.935	155.933	313.842	206.366	48.5857	20.3882	36.0129	19.2137	9.51477	12.7976	20.139
1456415_at	Zfp451	98403	55.8533	35.9372	74.062	82.6748	100.129	51.1553	79.1244	86.5701	58.5291	98.5355	23.9743	32.571	23.7131	27.7564	20.1345	18.4325	16.114	14.5149	16.9874	23.7829
1456430_at	Ttc14	67120	124.23	383.437	481.155	256.549	194.419	526.681	358.412	125.425	292.89	240.043	244.056	53.014	55.8615	26.5504	25.8885	26.3277	84.0844	125.88	48.7116	55.6457
1456433_at	Rcbtb1	71330	96.2418	188.354	347.724	232.156	148.151	203.32	259.924	85.5108	136.557	169.838	63.9042	55.5852	50.6325	16.6835	15.7612	14.6521	16.9667	15.1012	15.7748	22.7108
1456444_at	Fbxo41	330369	147.273	73.1422	70.5125	335.036	232.11	91.3517	157.532	205.958	145.687	161.554	16.141	137.421	65.7896	22.5209	12.9351	18.6387	12.8634	12.8249	13.1464	27.5355
1456506_at	Prpf38b	66921	145.601	90.8147	28.8045	111.366	133.086	178.19	177.795	102.027	104.26	75.6798	55.0987	34.7045	37.2105	47.8383	23.5653	56.0292	18.3046	22.2133	20.9714	49.0299
1456511_x_at	Eras	353283	113.671	33.9803	46.264	10.8309	112.516	56.9832	18.2333	69.9484	21.7415	19.494	15.3234	13.3346	9.32955	11.2927	13.4768	7.68822	9.13605	8.70633	9.70501	14.9013
1456514_at	---	---	69.1647	79.0899	101.306	33.9714	137.905	301.468	72.4665	64.4423	177.937	41.2122	65.0671	29.2824	96.2114	16.7709	12.9282	43.5866	7.64691	7.78045	10.9819	9.67268
1456567_x_at	Grn	14824	1226.85	820.82	897.615	675.873	1169.85	896.89	688.528	725.706	581.999	418.188	277.505	259.495	118.302	24.0161	40.7238	9.35214	75.2476	41.1811	23.7234	9.06051
1456597_at	Heatr3	234549	134.328	246.378	592.581	186.096	180.796	257.683	182.692	95.5256	106.199	110.703	34.6749	26.0087	23.6618	23.3574	14.1271	12.6678	13.673	13.7973	14.2181	14.1701
1456603_at	Fam101b	76566	87.3435	101.434	129.208	96.5815	45.4056	82.3275	145.147	44.9963	68.4062	84.987	26.7376	15.652	15.076	24.625	10.3229	22.522	24.3	7.88851	8.55441	25.461
1456638_at	Wdr59	319481	77.6732	20.0765	66.8086	47.859	76.3624	19.8645	53.5193	46.4815	38.4251	33.271	14.925	16.9365	6.42054	16.3483	14.748	6.28859	10.4962	6.42139	5.11575	4.90616
1456639_at	Zfp398	272347	41.188	44.5746	24.8732	37.3947	48.6767	190.083	53.4194	25.521	26.5244	19.8131	27.3888	18.7846	18.0206	29.0936	22.4056	20.291	22.2045	22.2067	22.5339	22.4621
1456655_at	---	---	215.421	90.1569	107.226	122.826	324.499	449.454	173.819	221.267	155.617	146.511	75.5818	100.029	62.1204	41.1989	40.7331	36.6516	40.5649	20.2274	52.4721	44.9459
1456657_at	AA415437	106493	14.9231	9.62414	7.45876	17.33	26.97	36.7566	34.2567	18.9923	25.7085	6.41916	8.12355	6.36543	7.55122	5.53513	6.31782	5.04927	5.21182	5.13361	5.22369	5.43529
1456673_at	---	---	108.665	50.1844	71.4555	495.998	234.845	181.043	230.509	350.82	283.942	352.224	72.8926	224.932	137.267	16.7688	7.38915	13.3446	6.89183	6.87374	7.00649	7.65126
1456724_x_at	Wrap53	216853	115.902	89.2399	134.885	32.4841	145.24	74.8524	43.8714	117.425	62.0818	32.3633	41.8782	32.4982	15.9244	24.2138	14.867	6.38607	9.90725	9.86534	6.00157	5.85703
1456728_x_at	Aco1	11428	584.666	131.726	270.238	708.212	922.8	137.963	345.062	875.604	374.192	463.464	57.2816	543.064	168.946	81.6571	52.7815	14.1667	91.7067	16.2246	5.96795	5.71452
1456739_x_at	Armcx2	67416	550.884	184.927	314.238	401.194	627.311	114.456	218.752	585.453	341.871	320.753	124.785	297.319	117.329	45.4502	23.2512	4.41719	42.7822	8.70455	4.84632	6.16156
1456748_a_at	Nipsnap1	18082	122.686	20.1106	52.9567	104.145	155.959	30.5535	96.292	116.153	58.7434	81.3676	15.7945	54.4005	9.6525	9.7861	7.95332	6.08271	9.68666	6.33574	9.82203	21.5373
1456756_at	E430016P22Rik	320578	451.259	296.668	581.956	315.27	443.606	351.811	420.128	311.39	295.793	214.561	75.7217	68.7006	44.318	10.0825	9.6934	62.1225	9.7474	9.53843	29.8734	64.8632
1456765_at	6430511F03	331475	128.145	54.6348	90.3225	89.3467	255.419	144.688	177.417	202.145	185.227	85.3392	20.2721	53.1484	9.3177	11.2949	9.39153	5.68798	10.2834	5.86971	3.62409	3.61085
1456789_at	Zfp462	242466	137.371	16.4241	40.0343	210.544	211.226	20.3487	80.0962	195.097	151.789	119.792	17.7428	153.023	52.9451	13.7601	10.2238	20.0501	12.7947	7.53467	7.37789	21.1508
1456808_at	---	---	35.3886	22.9408	50.4391	20.6891	35.6448	181.835	36.5305	40.0544	95.714	19.7437	28.548	14.1736	15.4259	8.50362	7.23838	7.4931	11.4307	15.836	10.5596	18.2469
1456855_at	---	---	15.7516	27.4413	27.5395	8.94993	35.6864	88.0259	29.2684	16.1882	38.3116	9.65592	10.4456	9.61926	9.75968	10.0383	9.86452	8.72821	9.86545	9.52571	10.1579	9.83916
1456864_at	---	---	188.582	112.174	174.645	49.1619	239.089	168.338	78.8067	128.975	125.215	54.1222	27.1511	50.3317	95.5632	34.851	27.6946	46.7848	11.5492	8.73734	8.75789	19.8311
1456871_a_at	Phf20l1	239510	467.597	408.902	151.079	293.207	563.198	633.968	464.603	312.387	346.307	189.178	282.639	137.374	172.675	177.576	153.474	48.448	79.5537	40.0826	11.3345	10.8791
1456880_at	---	---	112.781	178.431	215.454	131.325	204.569	655.842	318.148	135.038	315.309	152.854	121.269	61.0598	142.099	48.396	49.0974	101.824	74.9098	112.621	98.5573	104.83
1456913_at	---	---	44.2986	61.5628	66.5584	66.4655	62.8865	104.295	81.7763	46.5435	77.3359	45.188	15.2166	11.7115	14.9514	15.1093	8.56419	11.6684	6.95201	8.32756	7.34501	9.29446
1456914_at	Slc16a4	229699	43.6398	42.713	115.102	67.301	65.604	153.186	106.088	48.9518	97.5542	60.1439	14.735	16.4394	11.6767	9.24802	9.52008	13.9773	17.5352	19.1672	14.7697	15.3199
1456960_at	---	---	49.8058	39.6273	29.1035	11.2906	49.4852	155.308	14.0986	42.4916	34.7298	10.4312	14.4243	13.2773	9.31597	8.14011	8.80117	8.49379	13.1311	13.8145	8.29262	16.0282
1457027_at	Dhtkd1	209692	163.136	53.6154	167.225	78.1604	123.086	72.3925	75.5823	76.745	56.3949	62.8182	12.5244	29.5905	10.266	5.29637	10.3518	4.95331	10.2329	10.2603	5.05577	10.332
1457039_at	Cecr2	330409	60.5031	36.7074	94.2298	120.91	94.2756	80.9207	115.679	81.3606	131.322	94.3885	14.5816	46.363	29.5791	33.2994	9.11957	12.2951	12.628	11.7111	9.7224	12.5033
1457046_s_at	C77370	245555	128.997	55.8588	24.4412	24.2237	116.709	87.6986	98.3701	50.4055	36.4146	47.084	38.3953	20.8987	12.7551	10.1515	13.2776	9.09388	18.6504	9.59256	20.906	27.0046
1457064_at	D030002E05Rik	319780	60.8742	93.2612	64.481	59.7591	83.4869	310.371	102.643	45.3042	66.8983	47.8138	51.1626	32.9079	82.1425	13.6164	11.4756	50.0284	9.53825	34.3766	18.3852	37.3829
1457100_at	AW552889	102787	311.199	294.325	463.027	83.1685	278.455	512.772	149.53	220.409	193.459	108.075	83.094	79.5371	41.4744	31.0894	36.4969	25.5999	30.1717	10.2153	10.2998	5.20445
1457107_at	---	---	52.5782	69.7404	24.352	21.5818	78.5822	308.859	82.762	78.0059	76.4087	20.4108	35.3517	16.7628	11.5966	11.3644	4.45669	5.41365	11.3386	14.3685	8.56419	11.6045
1457113_at	Nasp	50927	81.2501	94.7179	76.207	33.7641	89.4698	180.055	100.868	52.1722	48.4975	46.3073	31.1774	26.3811	38.2212	26.8449	38.803	125.66	10.5279	22.5031	19.6548	12.8231
1457117_at	Nfe2l2	18024	43.4515	24.7331	24.3852	55.5933	43.5535	28.7501	31.1849	85.2396	65.84	32.1488	18.2549	25.1976	14.0936	17.0946	16.4257	12.8908	16.7849	14.3022	13.5641	13.2755
1457184_at	---	---	8.49429	24.356	7.54016	27.0347	40.3197	40.2002	39.9358	19.557	41.0891	14.9198	12.574	7.91091	7.96022	7.80594	7.60213	7.97981	8.12488	7.46425	7.694	7.77037
1457193_at	Mll3	231051	47.1005	26.3224	10.9649	54.6647	51.4734	56.3737	46.8816	78.3838	38.808	15.847	20.0203	29.214	12.1392	12.7919	14.9815	10.8007	12.5051	12.1528	12.2341	12.2691
1457209_at	Ddhd2	72108	46.1953	133.486	85.849	76.6237	62.365	258.189	157.459	39.4688	75.3731	35.4963	18.3925	16.5577	22.075	16.7662	33.3447	10.413	26.0926	11.3009	14.6877	25.9472
1457254_x_at	6330442E10Rik	268567	33.1092	6.92307	10.1882	21.685	59.3213	9.30404	12.1893	73.9371	12.709	24.6771	6.78798	17.9858	6.17944	6.73348	6.6315	6.09659	6.20138	6.18677	6.75819	6.72429
1457265_at	Sfrs17b	338351	727.998	453.144	644.169	1054.27	1100.97	796.761	1226.75	1002.44	934.238	989.257	356.848	391.594	221.614	103.358	44.0193	17.3346	49.0313	22.4011	14.5252	15.5556
1457324_at	---	---	34.4344	53.1618	28.1006	91.172	42.9457	220.39	104.54	41.0001	82.0723	46.1268	19.4316	16.8914	20.4331	12.5518	12.3349	25.9165	12.6621	26.9565	13.5359	34.1574
1457338_at	---	---	35.3045	66.9558	83.1358	31.6797	58.4089	220.601	116.473	34.3228	92.068	54.7605	37.0276	21.1834	21.1824	14.2522	15.0399	16.1991	28.9198	26.5698	23.5847	35.347
1457344_at	Neto2	74513	64.963	56.6415	78.9774	39.3454	112.54	325.25	98.8915	71.2026	153.084	57.2104	37.0223	19.387	25.345	5.9079	4.89991	5.89136	6.36487	5.48046	5.61334	14.99
1457360_at	---	---	22.8653	25.2556	37.1767	22.2952	19.5894	120.043	49.1401	15.6444	37.4898	17.6445	12.9745	13.8756	17.4437	7.94064	7.72005	23.0339	9.77988	9.97139	14.4264	17.6809
1457390_at	---	---	227.615	110.177	125.873	50.2328	212.299	280.397	135.501	142.844	149.086	39.9587	38.5539	38.3277	89.6076	20.9318	21.8541	62.0012	35.937	22.4692	19.8449	17.3818
1457458_at	Zc3h4	330474	18.2402	8.83077	8.31725	11.8901	45.6678	51.131	26.63	17.3784	37.0353	8.40968	9.57622	6.65184	41.0097	9.02515	9.10461	26.1629	5.55208	9.31689	10.0924	9.66797
1457464_at	C130015C19	403342	14.7087	17.848	38.6528	10.65	16.7976	70.8403	14.4329	21.6665	26.3652	8.62052	23.8608	8.98398	9.6299	8.48184	6.54413	7.42587	8.00169	6.2897	8.32334	7.99931
1457465_at	Shroom4	208431	95.6122	70.3762	114.082	119.323	156.102	100.312	134.111	134.51	176.547	126.481	52.4958	49.4858	43.8694	12.3248	12.114	8.74171	13.5962	5.74571	12.6192	23.8502
1457468_at	---	---	32.9044	10.9399	32.1427	14.656	37.0115	48.0954	22.8476	23.4479	23.3465	10.1362	14.5115	11.2371	10.3191	10.1424	10.0485	10.1542	7.73999	9.98681	8.16299	11.6763
1457480_at	---	---	69.4149	27.7945	71.2198	50.5714	80.3987	113.027	80.3997	58.5778	64.9569	35.0285	8.59692	17.6972	15.5449	6.54993	4.32641	6.17603	4.40681	6.40097	4.54822	4.50954
1457484_at	D930050J11	414326	27.7559	15.6331	6.9365	41.2044	15.8264	130.065	27.071	19.0547	30.7519	8.03377	7.54456	6.49938	6.59555	4.96191	6.33516	6.24697	4.95126	5.0578	6.50124	6.69291
1457488_at	B230339M05Rik	228850	34.4655	30.086	25.834	22.3285	76.6932	164.302	47.4319	36.9478	50.7623	18.0456	27.0736	25.8865	33.233	18.4295	23.2972	24.5974	20.8166	22.5735	21.1553	27.3368
1457500_at	Depdc5	277854	35.6538	24.7015	6.10809	16.9516	84.1573	73.5671	16.2819	49.854	20.93	7.94993	8.88224	22.7056	12.6806	16.2916	6.50895	9.07179	8.4423	7.42118	7.70228	17.5878
1457508_at	C430003N24Rik	320358	23.4404	55.9348	12.32	19.062	43.9312	170.48	32.3147	34.3441	96.3664	13.3892	17.5464	36.018	89.7501	6.57486	8.50766	41.1104	6.40126	6.00063	9.06924	21.997
1457513_at	Fam40a	229707	76.0326	39.1602	55.419	23.9706	90.3052	185.546	52.5196	50.345	59.753	18.5937	6.88839	23.7754	24.7196	26.0979	37.0233	40.5168	24.999	12.4966	33.2138	28.1625
1457522_at	Smek1	68734	64.339	62.7199	138.863	29.1642	87.7779	229.66	92.0614	49.2579	162.298	33.8605	65.3637	23.3019	48.2115	10.7984	12.3189	30.8319	12.2821	10.1867	6.19639	8.60762
1457531_a_at	A930017K11Rik	100034748	84.6035	24.8533	68.7463	24.5585	191.901	78.6985	49.8941	118.518	66.2749	29.2134	52.9983	21.6503	18.0921	19.1505	24.8894	16.897	23.3499	18.3858	19.5916	19.0915
1457539_at	D10Ertd709e	52701	48.0255	43.3837	46.572	31.9231	88.4983	192.317	82.0726	39.5954	84.8718	43.5396	44.3945	14.847	43.4413	14.3702	10.2353	13.8339	12.5363	6.71447	7.45991	14.7499
1457562_at	Rps6kb1	72508	53.8936	19.4393	17.9101	18.1177	63.1228	125.506	22.3701	50.1911	33.1738	15.1086	32.3729	13.8835	20.0766	19.9444	11.859	16.4138	14.3326	9.42944	10.5367	14.7842
1457586_at	---	---	98.9183	41.5897	90.2329	25.3324	132.549	139.637	74.1561	83.4637	80.2184	34.2106	39.4833	32.9579	25.5282	15.0659	22.6286	19.349	24.898	14.6554	15.2983	27.2743
1457635_s_at	Nr3c1	14815	107.197	26.7869	117.005	37.8336	84.7353	26.1893	41.5397	48.5019	36.9053	15.8195	18.1739	15.6504	12.8663	16.8097	17.0508	13.4422	17.352	15.8768	17.8756	19.991
1457678_at	2310035C23Rik	227446	93.4368	76.4562	55.7662	60.4346	118.393	267.604	142.975	92.8444	125.775	41.7958	50.5022	27.4736	31.1073	28.6013	15.731	21.1509	7.22552	7.0131	15.1159	22.0735
1457692_at	---	---	57.1373	92.071	114.095	78.9455	25.8901	126.988	110.961	17.334	45.8111	30.7893	15.8472	12.5943	10.6192	13.3702	13.2742	10.8345	13.2175	12.6583	14.4064	15.4411
1457736_at	Vps37d	194309	13.9344	6.58877	21.3716	35.1396	23.3433	26.7925	32.3547	21.8962	24.9072	39.2577	10.3728	9.05146	5.62349	5.47983	5.66085	5.07109	5.63071	5.5369	5.99265	4.98149
1457768_at	Prune	229589	39.5765	23.2845	16.0891	27.2406	57.0034	94.2751	97.238	23.1806	41.765	36.9716	16.8115	17.4072	21.6127	14.9033	10.0435	22.5077	12.9778	23.2351	22.1808	13.8605
1457814_at	---	---	48.6062	30.0536	14.1889	43.4817	25.7036	120.271	46.0655	26.484	42.8869	17.0183	16.3687	8.74967	28.0978	10.7407	8.55288	14.3586	8.73437	8.16757	9.0102	14.0391
1457842_at	---	---	117.416	129.531	181.241	65.4406	186.747	334.952	106.358	91.9167	172.551	47.2114	70.6673	32.439	55.6613	8.40967	5.54025	7.82521	8.38935	8.34575	8.74396	8.52577
1457851_at	---	---	59.1187	66.7195	23.6192	35.3406	82.6239	271.482	82.3304	40.1344	103.444	11.8066	9.01537	5.77488	8.7049	5.84501	5.76393	5.61767	5.745	5.48407	5.93051	8.60298
1457901_at	D4Ertd76e	52058	9.46226	13.5968	7.88096	8.77278	18.1661	117.423	10.018	13.1845	18.2693	7.73585	8.05363	5.20115	7.06139	7.66967	5.31123	6.88522	7.378	7.28563	7.76485	7.94505
1457908_at	---	---	65.8862	92.7334	17.5722	17.0979	81.45	410.072	57.3179	73.0837	124.822	19.6458	52.5759	35.0195	53.1687	23.5271	26.1571	49.5029	16.4714	16.318	16.0695	19.0971
1457913_at	5730601F06Rik	77519	139.867	100.56	81.9243	126.188	219.77	192.766	183.179	115.441	208.067	50.9795	34.4318	14.0244	39.214	8.66504	5.61776	10.374	6.19396	7.91547	5.79748	10.6493
1457915_at	4833442J19Rik	320204	31.6079	14.7911	23.7011	40.011	26.3465	19.6454	34.4837	74.5962	54.2824	37.1519	10.714	29.1078	13.7443	20.552	6.85564	7.33814	28.5239	25.0945	20.2717	8.89879
1457922_at	Ung	22256	69.9383	68.972	74.2882	55.7061	68.8702	123.879	89.0151	52.2673	43.1438	29.4047	12.0577	10.6199	13.6055	10.7719	9.4798	10.0774	9.44505	9.37377	9.72267	10.5585
1457934_at	---	---	10.5567	18.2672	6.60379	23.8785	16.0025	42.0611	36.7395	6.39287	11.4738	7.06515	7.43757	6.57151	6.0894	6.36251	6.1247	7.09201	6.65035	6.12363	6.67554	7.29889
1457988_at	---	---	189.668	197.417	143.138	192.488	369.64	840.193	379.533	139.007	368.81	157.001	119.005	72.1015	130.686	43.4809	49.615	137.38	44.1587	51.2419	60.9142	42.3962
1458003_at	Zfp398	272347	88.0397	76.8978	77.8171	13.6681	77.894	261.954	26.6369	42.7878	26.8976	9.8388	37.755	11.6237	14.9153	15.1532	12.4458	11.9106	12.2146	10.5741	10.6859	35.3213
1458023_at	Gpkow	209416	32.6446	10.4576	41.695	9.5498	31.5943	43.9825	31.1016	14.5961	20.7791	11.7857	21.9897	9.48572	7.45954	8.22877	9.85829	7.41043	10.2231	7.77566	9.9996	8.0817
1458125_at	---	---	12.8268	21.7004	57.7292	16.929	23.8798	73.7829	27.618	13.8901	20.2411	12.3593	12.937	12.0519	10.2344	5.84545	5.77021	5.4322	10.5972	10.8077	5.95442	12.6623
1458156_at	E230012J19Rik	319664	49.7176	26.7222	35.7987	19.1222	62.5594	130.918	27.1905	27.4112	124.037	17.8524	46.8354	20.85	46.256	10.1141	9.15203	11.7684	9.61107	13.6439	9.97073	12.0288
1458176_at	Per3	18628	58.8935	59.0636	62.5033	55.6418	71.1061	148.348	85.978	27.5156	122.118	38.1906	27.2025	19.5793	26.7283	10.9753	7.58366	7.04246	7.36528	5.64633	7.59436	18.7838
1458186_at	---	---	59.2425	38.2061	46.9673	27.3764	85.2282	239.666	35.0701	55.4476	175.012	25.2488	26.0285	29.5096	14.3566	9.42628	9.34021	12.7969	14.2788	9.29033	9.45853	9.42242
1458222_at	---	---	15.8811	15.9644	110.396	42.6475	21.4398	71.6962	70.6358	15.4937	69.0292	40.3449	16.5657	15.6202	16.0192	12.9298	13.1207	36.7105	16.1074	14.7808	16.6913	16.0463
1458268_s_at	Igfbp3	16009	12.0246	11.8772	16.9694	131.513	11.1649	49.5178	110.003	20.2073	32.0229	65.7582	11.1004	13.8374	10.8949	10.4383	10.1873	9.7888	10.546	6.93156	10.4132	11.9278
1458294_at	---	---	70.2794	64.4433	69.4372	17.2641	92.8866	113.559	56.0473	20.8171	43.4948	29.5838	41.6759	22.8425	51.8779	8.59744	7.47497	25.6214	7.47684	7.30359	7.88453	7.34954
1458296_at	---	---	73.8985	41.8713	140.907	42.8284	118.089	171.92	130.108	56.3605	112.929	116.961	47.3358	34.9314	28.6318	15.4121	14.4013	26.6734	20.081	22.8059	30.7001	64.549
1458305_at	Tmtc3	237500	38.0186	31.6103	130.531	29.8633	51.9826	105.69	83.6984	25.5251	47.4493	47.0799	14.7162	14.413	21.5692	10.5776	13.5108	32.552	10.5752	14.1371	11.2151	19.0293
1458308_at	Sbno2	216161	15.2518	13.4323	19.2771	15.7471	26.6739	36.4543	31.1782	10.3081	27.1269	10.8429	7.2596	11.0162	7.56513	6.61777	6.72746	5.88841	5.96802	6.86508	6.26433	6.56027
1458309_at	---	---	36.8802	56.67	23.4441	16.4464	29.4599	387.444	21.3394	36.7475	77.0242	20.6056	41.3344	21.4827	25.1142	21.4275	15.3677	14.4927	21.1015	15.0718	21.746	37.3218
1458335_x_at	Urm1	68205	52.0485	34.0023	54.898	43.3331	99.2013	201.618	78.3423	61.0754	74.7266	43.8676	40.4965	15.0464	22.5204	11.4895	11.5715	11.2321	15.2074	7.61624	6.7539	11.5326
1458374_at	C79407	217653	2058.5	1180.35	1171.98	2072.04	3193.7	2759.46	3390.84	3039	2933.45	2024.99	1267.99	1146.61	878.921	591.222	329.927	352.843	344.61	411.94	279.114	358.674
1458410_at	Garnl1	56784	71.8148	66.8334	123.785	27.853	67.9609	82.8941	61.2607	34.4932	51.1656	30.8878	13.0338	11.8121	8.46095	16.0488	8.06916	6.5805	6.86092	7.40968	6.9467	8.97619
1458417_at	Kdm3b	277250	90.1371	72.3047	129.074	80.4096	149.684	127.578	163.071	151.632	247.465	125.061	37.3786	41.9386	35.866	9.61648	5.58241	11.391	7.4865	6.60043	5.33018	5.27103
1458427_at	Brip1	237911	161.556	128.266	295.667	187.374	182.464	119.845	215.696	139.019	125.237	95.2946	23.4779	45.2933	16.3482	16.6468	19.1151	10.0666	26.697	28.8135	27.8468	29.8154
1458452_at	Ankrd11	77087	143.043	141.204	246.624	216.877	227.623	412.435	279.512	128.611	192.999	138.353	88.6189	71.721	74.9657	40.3831	55.2058	50.859	14.5069	27.0392	16.6402	41.0303
1458480_at	Topbp1	235559	31.0756	15.9509	49.9268	26.2203	50.7532	186.523	53.9953	33.8665	53.0508	30.5982	16.4757	15.8834	15.8461	7.67803	6.88607	10.0406	4.3515	3.79308	3.90902	3.79544
1458489_at	---	---	32.2424	21.3431	8.3138	14.1948	35.2298	83.2596	26.4389	22.046	13.9397	6.56264	8.66505	10.0537	14.5942	15.7257	13.6125	14.9884	7.47739	13.3175	6.86562	12.8022
1458512_at	Tle3	21887	70.8518	32.9208	66.1605	49.037	153.294	137.551	124.626	88.0914	83.2664	58.4883	32.2263	37.9612	28.4894	25.2356	28.9665	21.5307	53.7213	37.014	37.4727	30.2261
1458525_at	---	---	24.9026	20.0771	10.8282	11.2032	42.8853	85.3668	19.7714	26.5968	24.7477	8.55066	11.7056	11.3883	11.485	7.05249	6.93435	6.43532	6.92864	6.53769	11.7338	17.4721
1458532_at	Mtr	238505	229.944	62.1522	23.099	96.4178	242.541	101.234	130.357	143.161	53.6218	27.5024	26.8566	91.2656	30.4742	77.4019	56.237	24.2847	26.1296	11.9474	11.9964	46.5813
1458550_at	Myo1d	338367	10.5837	8.05023	28.0684	11.5435	18.4782	83.0483	13.3711	7.58318	25.0064	6.9828	7.0497	8.3854	6.85277	6.56708	5.97843	6.97792	5.9554	6.25783	6.77037	7.65592
1458592_at	---	---	7.68521	15.7221	15.5024	8.59648	21.8228	111.736	18.061	14.6171	18.6877	7.59456	6.8074	7.41948	7.52786	6.53447	6.44434	6.09472	6.42173	6.34545	6.66758	7.76609
1458618_at	---	---	47.0349	68.1454	113.342	36.9752	68.7988	188.613	103.127	23.9465	33.4823	49.511	18.1965	15.9852	17.772	6.4852	6.1828	8.17059	17.78	7.64127	7.77264	30.0055
1458628_at	---	---	23.1044	19.1922	14.4397	33.316	31.0102	80.7389	44.0528	16.0954	29.9877	10.2841	5.52937	5.35638	5.31374	6.55209	5.37584	4.71503	5.23423	4.6543	5.46637	8.03414
1458661_at	---	---	134.286	108.283	207.359	100.839	255.523	353.843	183.148	184.878	91.2135	115.766	53.1908	74.3783	43.4745	26.7928	40.7474	16.9231	35.5865	12.4137	30.6923	17.2707
1458663_at	---	---	38.9164	17.3644	35.4428	14.3043	69.8762	125.324	21.8141	47.5912	52.281	20.0476	15.5644	16.2667	12.788	14.9067	14.6951	12.2537	16.0192	12.619	13.2118	19.9181
1458701_at	Prei4	74182	8.24	10.1117	11.8964	7.34063	13.5983	69.219	21.5613	7.60326	8.86427	7.18574	7.96571	7.55151	8.14714	7.67289	6.74918	5.81083	5.13205	6.4024	5.69308	7.70703
1458703_at	---	---	19.504	6.49179	18.5159	22.5993	50.1087	33.3047	22.8421	34.5553	26.6553	28.4265	5.37403	8.77964	6.33843	5.45186	4.32801	5.10483	4.62841	5.24784	5.53854	8.64221
1458708_at	---	---	67.9148	171.97	270.547	181.999	86.376	512.351	337.393	52.2997	346.543	118.894	51.0782	29.5906	106.941	16.1303	12.9681	45.8657	9.69242	9.5588	10.1022	9.69242
1458802_at	Hivep3	16656	519.017	327.662	452.546	519.044	775.361	542.111	698.032	767.476	665.601	665.9	166.543	232.569	100.513	54.6208	23.6558	29.7202	24.7507	8.24534	10.9907	36.1014
1458813_at	Scn5a	20271	277.443	200.317	180.195	461.221	540.574	320.926	363.603	488.407	204.632	477.671	109.462	133.818	114.921	47.8091	22.909	31.1206	25.4972	11.9653	28.4413	21.9711
1458847_at	---	---	70.4323	20.8589	78.5768	31.0899	70.8332	46.9169	77.9694	41.7923	78.5538	19.4654	9.84634	11.3691	8.56189	7.20245	6.56687	6.76676	11.5474	8.66752	12.0699	11.6251
1458879_at	C76798	97127	217.035	150.411	103.484	58.7433	273.999	353.786	108.277	229.405	97.6576	41.1196	56.1687	78.6201	44.1374	28.8015	25.6243	41.407	59.4877	49.7395	58.1448	34.8521
1458917_at	---	---	21.7191	20.9484	18.7131	28.3432	46.3865	169.88	32.299	22.6641	39.2859	16.8323	27.4206	20.9678	22.9583	8.63213	8.08606	17.8902	15.9775	21.6788	16.7075	24.7975
1458924_at	D430013B06Rik	399594	60.8925	39.4425	13.1553	27.2984	70.4817	117.205	73.409	31.9845	61.1606	14.6592	15.4073	14.959	10.3485	8.6482	8.4703	9.32448	10.0979	12.0185	8.66388	14.8367
1458969_at	AU019559	102225	72.9184	97.9984	148.743	103.457	133.809	277.941	164.059	63.7049	103.256	102.59	43.8536	37.1197	47.7617	15.6879	22.6665	46.5744	6.8256	10.2561	15.6854	16.7656
1458980_at	---	---	17.7705	30.9639	28.3181	84.5202	23.3491	58.3525	88.9618	12.8944	44.2104	53.2381	8.89871	7.12492	8.65455	5.94041	3.31898	5.70877	4.10596	7.18801	7.39494	12.5029
1459143_at	Chchd3	66075	66.6282	50.7984	139.069	99.1284	94.5869	211.574	157.214	69.3381	190.228	118.692	45.2858	27.1031	43.9494	19.9239	19.6678	22.4777	19.6105	19.2874	17.2253	19.5412
1459185_at	Npat	244879	49.9909	12.7094	46.4125	15.8404	74.7134	104.307	42.2489	14.4475	12.6322	9.89618	15.2698	11.7226	5.44605	12.9225	5.2801	9.56589	5.82992	12.2801	9.77657	5.72032
1459202_at	---	---	197.67	106.395	133.741	89.5746	458.601	432.103	195.465	270.049	277.83	103.349	110.737	103.589	51.9823	20.371	13.5122	8.02731	34.4612	12.8237	8.42101	8.46861
1459205_at	---	---	64.5648	45.9659	80.9015	27.356	89.4493	298.901	64.2101	63.0163	114.969	29.5276	31.076	13.5812	9.50816	9.86624	10.3241	8.56158	9.7496	9.49502	9.90464	9.58941
1459211_at	Gli2	14633	165.702	101.837	200.979	78.4056	344.974	220.621	335.087	154.659	221.14	198.681	15.8863	20.2736	15.7033	15.1166	6.96507	9.05138	6.9273	6.90172	7.09335	11.8522
1459243_at	100042016	100042016	101.963	112.856	45.8325	47.0667	112.787	633.289	80.0921	142.546	215.656	25.6783	92.7891	38.9671	63.1945	36.7314	13.8892	46.7645	14.0008	13.8422	40.3679	39.4011
1459283_at	6430510B20Rik	320025	53.7159	35.6482	42.0582	93.3827	101.518	153.852	97.0278	37.846	62.7189	33.1609	28.8504	12.7708	35.0583	14.9001	10.6998	29.6983	6.48912	12.2741	15.8147	86.0704
1459329_at	Ttc7	225049	12.0404	20.0225	24.8852	10.7402	20.5706	79.0816	47.6048	10.2796	23.4313	12.8021	7.46167	7.10087	6.67814	6.75118	4.57587	6.58034	11.3658	12.0023	11.0994	9.16602
1459338_at	---	---	58.9616	103.942	50.4945	25.8128	113.645	517.828	24.9098	81.4724	63.0617	24.3096	7.62718	30.2776	5.58307	5.692	5.62718	5.35802	5.63568	5.56919	5.75484	5.62453
1459346_at	Tsen2	381802	49.4698	20.129	21.9352	23.8655	79.7957	70.6639	14.8236	44.3229	38.7048	12.7262	21.4056	10.3842	11.2625	11.1614	11.4436	12.0979	13.1372	10.8404	12.409	16.675
1459434_at	---	---	16.4706	11.7606	43.9329	15.8464	22.9068	55.5036	36.8091	9.21997	31.366	10.3261	12.451	11.5725	16.8793	10.7629	11.476	27.6022	5.41715	7.46288	5.8687	7.55898
1459463_at	---	---	36.0046	68.8365	128.967	69.0485	39.2569	143.896	213.441	36.9091	141.086	40.399	33.0346	19.6328	37.1646	22.8221	22.2705	15.498	23.7041	20.7067	33.0064	36.4615
1459469_at	C78516	97147	46.9924	31.2522	23.0438	22.5557	77.6226	205.545	72.3914	50.28	68.3317	18.6832	40.1215	19.5946	24.7846	12.8779	17.6015	19.6066	17.1268	20.3977	18.6438	12.847
1459485_at	---	---	8.64455	11.542	6.60805	9.27831	33.8205	92.5617	18.2676	11.159	6.93231	6.56028	7.29225	6.89427	6.65209	7.01452	6.93481	6.20363	6.8903	6.86935	7.08631	6.91882
1459488_at	---	---	147.704	128.778	32.7768	50.7252	200.962	344.909	86.0745	126.57	79.9919	20.829	75.4721	19.2858	22.9593	16.0166	14.0157	15.2508	15.4437	13.2623	16.8601	16.1418
1459522_s_at	Gyg	27357	119.409	32.9093	93.1425	53.4011	73.2888	34.2026	40.5697	43.172	37.9814	34.5702	66.3839	34.0674	6.28295	5.66722	8.60561	5.19825	16.958	5.55065	5.8953	6.99834
[truncated: 49 more rows]

## Sheet: Set2
Probe Set ID	Gene Symbol	Entrez Gene ID	Spermatogonia-PRJB02	Spermatogonia-PRJB05	Spermatogonia-PRJ07	Spermatogonia-PRJB08	pre-Leptotene-PRJB02	pre-Leptotene-PRJB05	pre-Leptotene-PRJB08	Leptotene/Zygotene-PRJB02	Leptotene/Zygotene-PRJB06	Leptotene/Zygotene-PRJB08	early-Pachytene-PRJB05	mid-Pachytene-PRJB04	mid-Pachytene-PRJB06	late-Pachytene-PRJB02	Diplotene-PRJB04	Diplotene-PRJB06	Round Spermatids-PRJB04	Round Spermatids-PRJB05	Round Spermatids-PRJB06	Round Spermatids-PRJB08
1416076_at	Ccnb1 /// EG434175 /// EG667005	268697 /// 434175 /// 667005	1457.44	2263.55	2919.94	3126.68	1983.46	4092.49	5151.14	2873.6	5962.44	7032.69	7057.78	1121.1	2307.58	433.862	840.025	3023.74	2987.8	6118.42	7484.07	7926.83
1416183_a_at	Ldhb	16832	76.2985	92.0751	52.232	99.0115	71.6086	99.0905	33.1579	120.906	104.845	98.3484	248.319	120.823	64.1527	23.2784	151.399	22.1706	164.712	85.9814	53.0751	22.4902
1416401_at	Cd82	12521	129.065	146.199	120.764	189.572	169.653	190.264	171.297	199.056	383.31	151.247	379.033	177.913	655.211	51.8417	34.5561	47.321	189.244	213.543	194.314	108.191
1416513_at	Lamb2	16779	145.994	124.414	106.849	175.241	98.2532	208.322	69.6035	75.7427	93.6178	48.0617	187.232	76.4103	59.7828	30.5667	22.8102	16.7168	72.8217	58.7521	40.9284	20.5892
1416589_at	Sparc	20692	376.914	862.468	304.477	1566.38	335.975	877.056	477.068	978.025	914.21	767.58	1602.02	1018.03	506.318	117.886	717.086	215.618	896.785	883.779	340.382	210.229
1416713_at	Tppp3	67971	39.6487	115.229	102.977	96.5173	58.681	200.455	80.0494	75.4217	54.5032	97.8242	180.283	76.4458	58.6474	15.0487	38.8685	28.4602	161.498	198.486	139.508	73.604
1417322_at	Dohh	102115	670.041	1004.72	688.423	768.53	891.493	1236.52	755.512	978.375	456.301	603.138	1116.04	428.316	233.373	481.845	350.86	182.803	350.919	482.24	173.962	259.813
1417606_a_at	Calr	12317	9949.55	9621.89	12822.7	8343.86	10002	17101.1	10108	11334.7	23626.3	11263.4	22509.5	13749.2	27682	8966.21	11164.1	16352.9	8972.07	9036.54	9336.32	8813.36
1417609_at	Ube2a	22209	26.4994	15.9577	16.1728	50.2957	21.4204	27.2331	18.8401	105.587	79.9821	31.0255	61.5262	28.2015	15.5146	7.595	7.65877	6.69735	14.2978	6.57067	7.22947	6.8317
1417703_at	Pvrl2	19294	45.9337	41.8762	47.7739	57.1817	57.8941	63.3987	46.6789	90.3993	164.877	60.3842	131.644	93.0311	79.1004	35.3177	86.8621	42.115	127.714	115.225	53.4326	53.2508
1418626_a_at	Clu /// LOC100046120	100046120 /// 12759	535.204	1077.22	646.366	938.193	668.123	2061.08	625.524	1546.01	2381.08	1689.27	2415.07	1591.81	1157.11	236.613	1305.68	485.94	1313.04	1276.81	510.543	90.4407
1418712_at	Cdc42ep5	58804	11.91	14.1384	9.96073	15.2543	14.5476	14.4276	13.206	20.3742	17.6735	21.5332	28.3417	44.222	14.7575	10.4	40.1332	13.0788	25.2949	13.7195	27.0916	9.19655
1418813_at	Serpina5	268591	74.7068	99.6807	72.3284	114.061	34.3039	129.908	56.5485	163.31	143.34	134.223	263.38	176.079	40.4503	26.4563	151.783	22.8261	139.43	163.549	27.0733	41.1678
1419072_at	Gstm7	68312	24.5675	9.56927	19.6511	16.9759	17.4811	14.7491	17.177	52.2755	43.8673	32.1925	32.681	58.6322	11.9269	11.897	40.6645	9.35753	32.8901	10.8771	11.8375	11.3483
1419223_a_at	Dtna	13527	11.5631	8.59927	6.6468	42.946	26.8017	8.05945	17.2909	50.4498	30.6672	38.2278	28.4772	63.6228	8.75891	6.94065	6.50954	5.09654	6.35798	5.26494	6.96691	6.37613
1419534_at	Olr1	108078	7.66161	7.76377	7.69693	7.06346	7.88402	7.47924	7.19578	7.73886	6.87566	7.27365	22.5892	7.68844	7.53296	8.30225	8.14278	7.15928	8.2175	7.94786	8.70542	8.67204
1419788_at	---	---	7.43884	7.42308	7.1044	7.53847	6.88575	6.56705	6.43395	6.7973	6.30077	6.37731	43.3735	6.74391	6.88112	7.11748	7.30506	6.06451	7.45041	6.83531	7.17647	6.97953
1419955_at	Zfand3	21769	13.8202	14.0334	13.6924	12.6394	14.3514	13.2903	13.9768	15.1612	12.0442	13.2724	36.319	14.8645	14.108	14.4178	14.1869	12.7632	15.4726	12.6331	17.0383	14.1126
1420211_at	---	---	17.9529	18.0405	17.4592	12.7697	15.8869	18.5624	16.0363	19.9923	11.8685	14.4712	107.227	20.0732	57.6182	20.3498	22.3718	16.7177	22.433	20.892	22.8707	26.9493
1420688_a_at	Sgce	20392	12.2103	15.5125	14.5389	45.1068	20.0007	24.9447	11.8773	28.3406	169.897	21.0183	88.8325	48.7614	263.385	17.1337	22.0441	25.1063	17.4724	21.1473	26.9915	14.5144
1420931_at	Mapk8	26419	109.511	375.188	221.309	70.6442	88.9764	468.085	164.948	53.7567	118.686	101.3	287.087	34.9973	79.6993	18.4173	35.3782	105.272	166.245	270.919	217.629	69.1161
1421754_at	AY036118	170798	1132.17	5564.6	276.687	658.858	1125.55	10757.6	712.857	1862.28	336.544	611.316	5954.92	1048.2	233.481	629.052	676.162	247.614	859.699	668.387	206.422	344.557
1422622_at	Nos3	18127	38.495	42.9564	44.1246	30.2612	32.1095	58.8675	45.3722	45.6336	29.2302	29.0763	73.4002	29.99	31.1153	15.3576	30.5508	13.0124	80.4766	63.0899	37.4369	31.2442
1422728_at	Inha	16322	129.182	145.667	103.433	84.5003	144.306	249.411	68.9671	348.453	277.676	161.965	564.396	286.847	133.625	59.3426	327.217	124.104	454.571	312.638	160.695	100.744
1423242_at	Mrps36	66128	1335.09	1119.04	701.757	772.042	1242.06	926.078	873.452	1398.65	660.987	865.654	1510.66	605.002	243.692	211.656	241.373	115.639	1256.07	648.849	566.848	615.106
1423346_at	Degs1	13244	476.137	397.473	409.086	341.509	470.546	540.406	372.61	567.056	850.815	243.37	868.658	412.334	777.934	278.43	169.278	94.9747	109.927	66.412	19.7734	15.017
1423446_at	Dapk3	13144	74.7019	277.087	202.169	210.762	76.6545	261.607	150.553	65.5222	20.4494	176.496	229.253	92.1647	100.56	83.9898	59.6521	129.121	45.2788	256.207	94.0739	82.6371
1423522_at	LOC639633 /// Npm3 /// Npm3-ps1	108176 /// 18150 /// 639633	1395.8	2420.63	417.904	499.532	1152.3	1970.5	416.224	991.293	630.189	310.958	2171.75	1254.05	752.932	1565.82	1444.37	562.252	991.879	1996.84	760.273	270.664
1423648_at	Pdia6	71853	1265.91	2150.87	3207.15	1855.17	1270.48	4168.7	2206.89	1113.43	5820.44	1773.21	4772.02	1472.82	7860.86	1041.14	969.648	4540.88	642.501	1918.82	2732.39	1738.46
1423887_a_at	Telo2	71718	445.434	469.124	394.651	249.812	439.846	537.234	331.328	350.352	250.849	287.447	1241.8	273.732	126.76	190.144	228.409	168.569	230.42	178.295	188.713	269.997
1423955_a_at	Lass2	76893	24.8056	23.616	19.0414	24.2526	22.4502	41.4088	13.3946	51.1884	142.123	26.2393	126.848	68.8502	109.552	39.5632	30.9462	13.2881	25.482	15.1566	10.7439	12.8272
1424293_s_at	Tmem55a	72519	14.6182	9.29721	30.9467	37.5633	15.36	18.5715	13.8879	9.67013	9.79506	17.2344	41.3446	8.19364	6.68924	6.96203	8.74471	8.17274	7.95775	7.29049	7.10248	7.53551
1424627_at	Cst12	69362	746.421	742.866	477.409	524.747	696.513	1290.74	321.106	1973.75	1554.18	943.335	2616.62	1886.55	776.81	313.324	2105.75	483.201	2159.48	868.03	405.051	67.5048
1424834_s_at	Itpr2	16439	14.6345	10.632	13.9953	17.9043	14.7674	15.1278	13.741	14.4409	13.1596	13.4616	36.3459	14.2517	14.4869	14.8034	14.8906	13.9207	22.8936	20.2019	37.6384	14.4376
1425614_x_at	H2-D1	14964	80.4198	106.533	68.986	193.577	65.8255	133.069	64.0781	78.9488	254.355	28.4248	195.105	58.9398	62.5786	44.0809	29.5629	41.4395	15.6154	60.5497	65.366	58.5778
1425845_a_at	Shoc2	56392	37.1125	38.3404	85.975	27.6957	27.7803	35.563	62.9136	13.8635	20.3072	29.571	67.0461	7.60885	7.52815	8.99584	8.84903	8.88725	11.9832	18.8344	21.4035	18.9664
1425935_at	Hspb11	72938	11.6276	11.9283	12.2392	9.38767	11.9749	23.0636	11.9967	11.2852	11.3971	10.218	23.8807	11.1688	11.3563	12.0853	11.7837	10.8282	11.8232	12.365	14.1132	19.1144
1426069_s_at	Slc7a4	224022	16.1219	21.5987	15.8149	14.2696	16.9549	21.798	11.8769	15.9785	17.9228	17.7789	57.3483	15.9104	14.8156	10.6271	22.3067	10.1365	36.3669	15.8291	6.852	6.54024
1426215_at	Ddc	13195	10.2937	7.29325	7.02109	63.4036	21.3857	10.087	19.5274	73.1	26.7166	49.5535	25.8441	52.4067	13.7996	12.3579	11.0019	9.37369	12.8895	16.2236	11.2826	10.3163
1426531_at	Zmynd11	66505	79.3657	64.3463	37.348	155.573	109.627	163.161	36.3445	141.175	195.646	88.7248	214.419	132.825	210.211	108.137	87.0428	88.7786	84.9937	35.1212	105.084	35.4218
1426916_at	Scrn3	74616	45.5167	66.5533	28.7325	29.1006	41.1685	59.0589	32.6854	35.0998	28.1713	25.6682	72.5772	26.417	29.3478	22.7978	21.3347	26.799	29.4354	25.6229	29.8849	29.6595
1427100_at	Metrn	70083	436.163	748.119	470.844	271.607	492.57	754.057	399.863	284.78	182.507	248.53	535.845	156.76	116.192	102.139	100.881	86.3119	150.396	317.82	206.379	108.325
1427320_at	Copg2as2	100044236	15.4804	27.5088	9.36355	37.1417	13.5306	133.479	16.9172	14.4998	10.0706	16.7017	97.5349	10.0417	15.2157	20.6533	36.0988	138.716	10.198	16.2286	11.5983	94.1874
1427651_x_at	H2-D1 /// H2-L /// LOC636948	14964 /// 14980 /// 636948	60.0487	58.2417	41.9996	153.024	41.0734	86.3214	60.9239	70.0337	146.459	26.6346	125.317	35.697	29.2307	41.1503	35.4484	29.8633	38.7707	36.9464	41.3973	27.7475
1427838_at	Tubb2a	22151	21.5536	19.2035	9.64825	11.1282	13.9255	11.0567	14.1674	26.6405	9.43282	14.1007	25.1713	9.02573	9.40243	12.2749	10.4785	10.9816	19.6311	26.5611	10.7267	9.38019
1427989_at	Amhr2	110542	65.4689	118.198	95.2939	98.7847	46.676	188.373	79.3758	159.009	183.419	179.967	301.934	239.204	95.11	56.0331	228.064	46.3256	240.257	186.597	62.9896	25.091
1428434_at	Zcchc12	72693	52.122	34.2004	26.8089	85.6607	69.6782	33.0213	83.3629	140.601	99.7671	107.721	85.5392	80.6346	43.3294	36.2886	34.8383	21.3419	97.8666	46.1817	37.765	24.9167
1429065_at	1200009F10Rik	67454	14.3116	18.2576	24.0338	35.4627	8.84066	24.8215	10.3919	8.14287	93.7126	8.94752	76.1269	10.9739	52.0222	8.55856	7.30666	9.30014	8.20837	8.28507	8.61964	7.39732
1429292_a_at	2310046K01Rik	69698	36.5318	38.1366	33.8171	34.13	39.1728	48.6464	34.719	114.496	73.0274	41.6425	85.194	81.4824	35.9949	23.6148	102.507	33.3054	109.291	46.9503	30.3918	36.5292
1429331_at	4632427E13Rik	666737	76.3874	102.253	37.5065	125.836	92.1408	399.327	186.934	62.5912	158.856	73.5002	172.874	26.9854	187.099	26.2068	24.008	32.1551	24.0358	23.762	42.1637	58.6869
1429735_at	1110003F05Rik	66145	27.9195	48.428	33.9452	39.2132	42.2884	181.12	57.0184	35.8467	161.848	32.2923	102.096	35.1984	203.86	34.1186	35.9741	83.6454	27.3288	33.6255	15.9536	28.5374
1429880_at	4921531C22Rik	66730	342.404	604.864	262.078	361.402	312.029	1947.51	1160.05	320.298	912.427	479.395	821.254	111.861	222.851	176.535	239.082	299.069	609.499	733.084	564.724	509.888
1430216_at	Zfp292	30046	43.1629	64.807	16.4886	41.627	51.6427	107.791	127.83	58.7851	37.9044	9.98927	66.8423	11.5586	10.8812	11.9918	11.0331	10.6106	11.5231	10.6614	11.4754	10.9715
1430585_at	5930436O19Rik	77068	27.4742	15.4506	17.6522	13.9103	34.457	95.5537	9.15907	21.2585	130.522	9.34041	63.5403	29.2911	125.674	20.4241	16.3556	48.7353	5.23278	10.5528	9.52316	11.3982
1431890_a_at	Mllt3	70122	13.7242	9.89937	11.7638	39.0763	31.1546	12.1283	14.9535	35.4649	13.4971	42.2453	27.7106	17.1195	12.0351	10.1767	8.45852	7.10913	12.0967	8.11992	9.12	10.0171
1432643_at	4933411E06Rik	71181	4.95155	5.41068	4.79185	4.40103	5.04394	4.83523	4.52035	4.92079	4.58409	4.52319	21.299	5.15013	4.93706	5.10463	5.41768	4.50633	5.72482	5.29164	5.37529	5.08177
1433209_at	2210017G18Rik	70386	23.5799	15.1888	15.9319	29.0504	48.3383	79.396	29.3933	74.0145	186.469	42.0693	90.0008	45.7134	22.4194	16.4529	10.036	15.5094	15.754	9.84411	11.9064	20.1437
1433510_x_at	100043718 /// LOC100048508 /// OTTMUSG00000012957 /// Rpl36	100043718 /// 100048508 /// 54217 /// 622534	10095.3	10898.2	7718.16	5004.32	7748.19	7235.39	4960.36	7562.7	4398.64	4589.87	11316.2	4900.8	2730.03	5414.98	4860.73	3015.37	6512.42	5803.04	3915.22	4478.26
1433806_x_at	Calr	12317	4635.89	4192.74	6190.73	3471.76	5061.18	7869.51	5138.99	5716.96	12625	4787.32	11682.1	6514.3	16113.6	4760.5	5727.91	7454.14	4602.9	4242.99	4259.75	3577.61
1433950_at	Igsf21	230868	19.9824	14.8492	9.28535	17.5214	33.6293	8.91113	8.93822	34.0555	8.3169	11.0608	32.8898	25.0223	7.18261	8.47171	7.3732	6.73427	9.02087	8.28937	10.186	6.13924
1434276_x_at	BC004004	80748	73.8554	74.2088	57.8476	39.077	69.4886	65.0175	51.6471	74.9295	66.1779	36.2182	96.4928	43.7802	40.3828	35.1933	26.2261	16.7728	37.4401	12.5482	18.0017	16.333
1434542_at	Gpt2	108682	15.9185	23.8394	23.9419	34.5634	24.7855	21.9252	23.3594	22.0437	22.4295	22.7965	48.26	23.7625	24.2821	24.8858	25.1487	22.3196	24.4629	24.5009	28.2786	24.395
1434739_at	Fmr1nb	207854	1250.89	862.929	1134.7	493.8	898.081	1641.43	702.516	1083.11	2130.74	481.334	1661.47	213.027	257.159	86.2588	90.0452	104.497	293.91	446.031	573.862	178.584
1435129_at	---	---	2139.1	4197.28	705.378	1260.11	2051.69	5228.52	1418.47	3024.95	1879.89	1447.8	2781.41	912.26	616.979	1007.77	914.972	567.075	896.721	1618.15	459.665	815.17
1435318_at	E130218I03Rik	77490	14.9169	5.60599	5.72859	9.28479	5.92281	6.20925	5.65156	13.4741	5.25443	13.155	37.4875	8.31443	5.80898	5.93771	5.64059	5.47927	9.47601	18.0912	6.00598	5.77165
1435651_a_at	Smarcad1	13990	31.5297	33.5086	38.1228	45.8434	45.7626	36.0703	54.247	73.1694	49.9163	95.7241	93.6201	53.4546	16.5121	22.9358	39.3741	55.7042	41.5688	35.3833	59.0852	38.9635
1436257_at	Ss18	268996	38.8408	28.8072	31.5846	68.2641	63.2265	145.844	197.252	51.2774	54.7084	25.3246	91.6126	21.8902	45.7696	24.0929	20.0104	28.7543	18.6759	37.9779	19.3527	84.1639
1436631_at	Ctnna1	12385	55.3487	34.9311	60.1003	20.7501	60.3259	175.045	20.3044	42.7671	101.776	19.1229	80.7241	12.2507	9.09406	8.56545	8.4442	7.37969	8.1554	8.32725	8.57807	9.63689
1436660_at	Rrbp1	81910	12.9229	14.4329	23.1278	20.6728	22.0986	63.9308	38.8633	23.2942	38.5413	11.2893	32.4431	10.4442	23.7178	12.3655	10.6018	14.1031	10.2206	7.56224	7.67752	14.3597
1436683_at	1700011M02Rik	75443	85.6364	122.969	54.0023	43.9851	56.1881	96.3825	48.2173	255.866	68.4518	63.8833	440.648	214.381	35.1405	39.6007	219.372	6.95605	261.673	36.2086	20.7207	4.73342
1436692_at	---	---	36.5553	49.8174	21.2146	21.906	36.7482	83.6107	18.6255	17.1157	27.3257	13.4071	43.564	12.6396	11.7578	13.325	12.6207	13.4482	13.317	12.3053	14.7495	15.0847
1436844_at	---	---	27.1191	29.6089	30.3481	20.0167	72.2078	113.156	29.1752	29.544	66.2473	13.3189	56.5951	26.2203	61.0397	29.9009	26.0512	37.901	26.2898	26.9735	19.8368	29.7185
1436948_a_at	Fam70a	245386	66.6972	101.066	67.8452	19.2166	129.144	135.01	30.5072	312.801	171.179	88.142	271.771	204.302	21.346	27.0662	246.496	18.941	340.811	107.443	26.9579	7.82372
1437454_a_at	Txndc14	66958	1378.68	1085.65	1166.18	793.704	1048.08	1248.68	727.004	1055.09	841.812	593.991	1655.56	1261.25	2200.87	799.65	752.076	804.042	702.532	686.23	553.196	382.023
1437458_x_at	Clu /// LOC100046120	100046120 /// 12759	1833.68	2056.33	1211.4	1245.36	1964.5	3286.5	1123.93	3928.94	3819.05	2270.21	5552.35	3731.61	1425.8	569.651	3221.5	630.104	3884.3	1779.9	586.148	207.95
1437544_at	Fubp1	51886	182.362	297.78	186.536	664.426	299.876	1334.73	1159.5	320.154	838.709	247.619	531.298	112.83	421.844	161.114	119.209	231.729	89.1648	191.634	111.361	262.95
1437638_at	Srrm2	75956	430.242	385.778	83.8509	125.111	491.545	987.748	150.847	431.655	291.918	53.2076	331.706	122.148	284.752	141.998	76.0765	142.678	77.7935	128.797	54.0201	113.479
1437689_x_at	Clu /// LOC100046120	100046120 /// 12759	2952.38	3358	2123.82	2547.88	3071.38	4930.26	1954.21	6169.88	6234.59	4505.32	5856.74	6153.95	2345.31	856.462	4754.83	1143.02	5230.81	2790.27	951.854	388.284
1437951_at	Dis3l2	208718	20.245	31.35	8.83709	29.7172	46.3213	60.8842	37.1528	32.4621	47.2342	20.3907	60.6596	21.6074	21.6545	20.3723	12.6624	43.4108	27.2393	53.4905	32.0053	24.8675
1438265_at	---	---	10.1349	9.79141	9.17985	8.50414	9.93597	10.4198	9.41436	12.3676	8.58404	8.91778	23.0224	10.4104	11.7971	12.0517	14.3978	15.2888	10.3919	18.2465	10.0102	10.4595
1438635_x_at	B930041F14Rik	230991	51.0038	16.8912	15.9719	62.576	76.3338	12.4987	16.961	50.6106	16.8728	16.7253	48.5159	23.2253	16.6318	11.4939	15.6913	10.8692	16.8055	14.3245	16.2815	16.7972
1438714_at	---	---	44.2599	177.068	43.4922	20.6107	59.6649	633.652	26.7109	58.2491	111.501	27.2992	180.624	46.9095	141.925	50.477	62.782	97.7828	26.9744	111.646	27.6966	20.444
1438807_at	Hnrnpr	74326	27.1027	56.3012	28.9021	29.3905	34.2074	205.427	74.342	19.5212	88.3597	14.4603	60.3705	12.382	73.9235	16.3591	17.8556	55.7075	12.448	38.6621	15.4221	19.4211
1438871_at	---	---	62.4297	162.423	133.974	80.9859	69.6773	369.876	142.094	40.4103	286.859	49.0119	171.906	50.3755	243.417	53.4135	61.6916	185.793	19.0618	109.03	88.8655	82.8828
1438908_at	Map3k12	26404	247.914	271.461	124.948	68.8769	231.812	269.666	124.053	354.457	73.7439	128.986	548.505	198.303	93.8444	182.831	157.584	127.025	366.525	295.95	131.572	128.016
1438967_x_at	Amhr2	110542	317.3	477.192	249.362	264.937	416.086	783.352	186.545	866.76	739.216	501.741	1601.78	874.645	430.96	129.481	812.395	154.285	1389.33	618.566	230.069	59.572
1439005_x_at	Ywhaz	22631	478.727	848.526	356.14	393.695	526.983	959.532	560.837	680.53	263.343	453.113	1008.93	469.222	311.751	518.266	441.25	324.65	445.396	558.758	397.717	521.365
1439096_at	Ddo	70503	6.109	6.10844	6.00187	6.0848	6.17246	5.7595	5.90285	6.14803	5.35862	5.65399	28.8272	6.02958	6.07039	6.43102	6.75187	5.76817	6.30788	6.17472	6.99572	10.2025
1439400_x_at	5430433E21Rik	74492	19.4318	31.4462	15.355	11.2553	15.45	16.6468	9.82559	15.4081	29.8841	9.0895	68.9883	12.735	41.4583	10.1284	8.91106	21.2402	15.1966	14.0434	15.4461	15.2444
1439453_x_at	Rnaseh2c	68209	1219.21	1088.07	693.703	531.065	1273.01	974.99	632.416	1539.7	481.943	580.787	1811.41	1293.35	440.262	1606.38	1631.58	441.331	1237	831.526	379.385	316.211
1439473_at	---	---	9.52484	9.27898	9.42102	8.02124	9.74947	14.6719	9.10598	9.57849	10.2738	12.4465	21.1952	9.52717	9.30273	8.46445	9.79757	16.4383	9.79524	9.30476	10.8375	10.8741
1439599_at	Gal3st2	381334	15.2652	12.7875	13.8797	15.037	15.0866	14.8415	12.5623	15.1075	13.4296	17.9573	50.6132	15.4274	14.7732	14.0827	14.7174	12.1603	22.3081	16.2152	28.6557	29.5801
1439643_at	---	---	43.1569	70.3812	34.9733	8.29578	74.8155	282.815	28.9331	32.9751	113.948	8.1766	100.993	35.2453	139.427	35.0034	50.443	95.1389	36.2958	97.6694	42.827	53.1304
1439860_at	Eef2k	13631	17.8415	18.1152	15.3198	63.2246	34.1454	52.2361	49.9466	25.5092	39.3019	47.2559	41.9545	15.14	12.5705	15.5041	12.5639	14.8548	9.95683	15.2442	16.6622	15.9569
1440143_at	Pigz	239827	5.21026	5.31454	5.08318	4.90773	5.38146	5.15629	5.0436	5.18883	4.7639	4.96946	25.1595	6.29419	7.6977	5.47761	5.32867	5.24242	5.99569	5.28333	5.46633	5.29681
1440287_at	---	---	24.8574	40.7757	34.0495	21.5838	32.1081	172.692	21.6569	25.2522	97.4553	21.1706	87.8553	24.9741	46.3713	13.0743	5.96006	28.2239	6.63058	6.759	7.6193	19.307
1440373_at	---	---	166.311	139.279	109.525	117.155	259.684	352.977	217.129	149.571	425.3	107.019	293.912	95.1968	433.175	115.664	108.185	245.507	79.5088	122.239	96.8674	83.0178
1440439_at	---	---	9.30545	10.3178	7.54118	17.2246	9.3747	58.7998	13.7828	18.1792	17.5793	8.57667	44.8221	9.19771	30.1991	9.32384	8.93076	10.2162	9.21252	6.68661	7.25271	9.23767
1440513_at	C80258	97540	22.3495	36.3072	36.4974	15.3113	30.4012	151.399	32.9825	16.1481	85.2202	22.1228	71.9467	24.6069	139.974	36.5981	17.5986	120.634	35.9942	36.7386	60.2707	38.0079
1440579_at	---	---	62.5588	52.4169	51.3404	51.9418	101.112	202.788	112.648	97.192	159.207	29.0486	120.376	62.4581	121.701	37.1404	41.0871	84.8996	21.0411	40.9599	41.5844	41.0693
1440587_at	---	---	27.1213	31.7998	26.0304	11.9503	44.8179	293.653	20.9083	25.665	200.501	20.7485	128.385	21.462	120.505	18.3758	17.7142	53.3009	18.4463	16.0972	18.712	22.8997
1441008_at	Dym	69190	17.6456	18.3574	13.3376	16.4106	19.3922	15.3758	14.2905	19.8763	17.257	16.5005	38.8344	18.4017	16.9548	19.694	19.2096	26.128	20.0155	21.8525	21.8874	19.7233
1441177_at	---	---	24.0903	75.5756	9.20724	46.2382	23.7074	233.015	100.616	29.8065	50.9165	15.3223	54.7575	11.2302	17.1791	12.7625	10.5788	22.6507	11.3472	13.9189	12.4791	11.4199
1441320_a_at	AI413194	100620	8.85127	8.53392	8.2845	9.01712	8.71328	8.06623	7.94753	8.73896	8.00611	8.6512	21.9294	8.53069	10.083	8.6891	7.81636	8.06827	8.9851	9.31949	9.3229	8.79336
1441370_at	Tmcc1	330401	11.7104	34.6176	5.34453	15.9846	19.5908	168.11	17.4399	11.1058	34.6621	12.4356	37.4983	13.107	27.4924	10.009	11.9851	48.956	4.99404	12.9132	12.455	12.6789
1441444_at	Nbeal1	269198	53.8351	37.0091	19.3471	10.6381	43.4498	72.097	14.4842	28.7905	34.4972	7.53395	104.828	14.328	41.5561	26.289	21.7997	25.9862	9.07288	8.40383	7.22375	9.43199
1441556_at	---	---	21.0473	17.4418	19.9253	25.5551	26.9844	69.6946	26.6844	26.2416	139.235	29.9928	93.6732	17.8502	275.461	39.0191	10.6875	161.338	19.126	38.4398	24.1099	47.5697
1441564_at	---	---	8.54472	8.36271	10.1165	7.98994	10.2679	10.6382	7.77568	71.6016	72.2774	12.0682	70.5876	8.677	8.17647	8.65449	8.87971	7.68193	34.4545	58.7897	22.5468	52.2722
1441567_at	---	---	12.0325	13.3407	5.52344	3.44551	13.6664	59.096	8.06035	16.9146	13.3146	5.23258	22.4035	8.15679	12.1751	9.39136	8.36059	8.84196	6.79104	13.427	8.73686	8.36142
1441578_at	Ccdc86	108673	11.0862	16.0279	38.6883	16.1442	12.3193	9.66628	19.9943	9.35627	27.4816	16.3962	37.5954	9.98901	12.8762	11.9387	8.68047	6.661	9.76805	8.47678	8.69595	8.4954
1441643_at	2010-03-03	320253	8.43608	5.25444	4.57936	11.7325	12.0431	129.955	66.2666	16.2806	37.5772	10.228	24.9368	10.7592	66.2281	11.1331	10.8993	30.7188	4.59124	5.81496	4.68839	10.9131
1441656_at	B930068K11Rik	320622	10.4284	9.14528	5.14247	5.06095	11.1937	318.564	4.29684	8.82494	91.9371	5.15548	43.764	5.25844	5.21399	5.442	5.2985	5.17722	5.33864	5.19907	5.29297	5.26872
1441861_at	1700018G05Rik	69388	35.4225	56.4048	32.26	31.0689	46.8668	46.0503	18.855	114.773	31.709	28.5398	167.191	108.609	26.7611	27.1523	142.456	5.36092	191.714	26.8272	27.2492	4.71535
1441952_x_at	Lynx1	23936	33.9707	21.2844	21.4963	11.514	89.0641	47.1383	32.6657	81.5223	40.6446	22.931	129.406	11.2975	8.41437	8.60878	5.10714	6.93077	4.40713	8.28311	5.2729	5.08489
1442197_at	AI480624	102540	117.792	83.6542	18.3281	82.7047	137.069	283.64	73.3835	114.495	89.897	43.8986	149.009	64.5619	92.6401	67.1971	59.555	69.2831	36.821	69.1506	40.8526	70.8979
1442251_at	Vcpip1	70675	21.2702	22.9531	16.2002	17.087	30.2918	90.5332	25.2019	22.6175	32.4023	14.5166	55.5679	17.4801	57.1786	22.358	16.5914	46.5408	16.3812	20.7705	17.3646	20.1382
1442270_at	---	---	8.13499	6.25484	9.04383	5.02793	17.6821	225.945	5.44125	5.99083	66.4417	5.10581	29.9366	5.23324	6.17752	5.36452	5.48232	5.86812	5.77655	5.25965	5.4187	5.76056
1442484_at	D9Ertd306e	52203	116.37	178.022	87.8106	34.7454	207.97	529.687	71.7784	156.638	163.364	37.952	208.441	58.7396	171.109	47.928	29.8955	82.1904	11.1366	64.9332	23.8707	15.9598
1442489_at	D1Ertd564e	52347	76.7041	77.8052	23.3136	33.4488	101.996	228.057	35.8953	57.4343	58.7286	20.2317	138.252	33.6103	51.5559	37.4623	27.4906	43.3155	21.7901	43.0535	17.4462	30.4074
1442897_at	Fam13b	225358	68.8312	170.913	43.8609	68.6323	92.6344	432.165	80.2502	98.2731	130.361	41.9212	311.13	40.9943	226.662	69.294	41.1681	132.46	57.508	91.1938	23.8544	52.4047
1443037_at	---	---	49.2215	108.928	33.6966	30.4922	56.5013	413.983	39.408	84.4218	171.585	22.2056	107.816	33.4208	33.0475	8.20808	9.90377	7.14044	11.5096	7.53874	14.4247	28.4611
1443067_at	---	---	6.49576	5.77658	6.51137	5.9029	6.81212	6.31963	6.39963	6.58879	6.16268	6.2508	19.6776	6.53878	6.62152	6.89255	6.87162	6.28556	6.91009	6.65368	7.28109	11.9172
1443128_at	Ints6	18130	26.7992	18.933	27.7437	9.791	41.8708	135.958	37.7427	23.4475	103.22	19.7839	48.1342	27.3322	44.8982	13.059	15.4759	23.4941	9.36047	13.8041	10.9138	9.36004
1443180_at	---	---	151.876	99.8929	39.9667	40.8158	201.57	343.203	82.8356	133.328	152.891	36.8253	170.481	34.5879	51.0499	51.9099	39.6538	37.796	41.4034	60.773	31.7995	24.352
1443323_at	Ccdc76	229780	15.9149	14.2269	17.8852	9.79879	20.7287	41.2718	12.7708	17.3216	14.9118	10.4558	30.9498	13.092	14.1807	14.5587	14.7551	13.2881	16.3639	14.1854	15.2608	14.9685
1443520_at	---	---	12.4044	11.7914	23.402	11.882	15.9096	23.2223	8.38885	13.3538	11.1267	7.89809	31.9007	12.1207	20.6196	17.2218	12.3554	24.3769	12.1745	9.26497	10.2473	12.3613
1443621_at	Xaf1	327959	30.25	11.8005	11.2586	24.6091	17.9289	17.8248	11.6577	15.2511	10.1321	13.8532	31.2222	15.316	9.21677	10.5324	11.9394	8.59045	14.0164	11.8559	9.97733	11.7547
1443719_x_at	Ddx42	72047	9.0269	4.95207	9.22729	5.48331	22.1082	30.483	9.19702	9.83056	7.20044	8.1334	50.6863	7.48477	16.0143	9.30722	9.31787	8.85388	10.1766	43.904	9.28515	9.0186
1443798_at	Pik3cd	18707	6023.75	11231.4	5067.79	4983.44	9389.27	12749.4	7547.32	10364.3	4727.63	8712.1	25642.7	8529.2	11459.7	7459.09	4626.85	3437.46	6820.45	5436.01	2875.4	9055.89
1443830_x_at	Rnf103	22644	162.41	150.634	159.258	117.743	181.12	189.363	126.356	228.145	192.272	116.148	310.198	175.656	227.915	201.148	182.133	146.725	145.852	135.62	115.617	77.6311
1443862_at	Mbtd1	103537	136.825	113.018	86.0366	170.664	195.127	468.422	198.341	229.826	604.021	173.515	415.115	182.089	1230.3	183.762	182.047	609.455	92.8023	130.168	96.9955	74.3801
1443893_at	---	---	10.5053	10.5151	10.0745	9.53715	10.7772	10.5441	9.82894	10.4767	7.67123	9.70694	20.2012	10.6904	10.3676	10.7029	10.6963	9.37802	10.6638	10.527	11.5338	13.4375
1443905_at	---	---	102.864	45.5379	60.9202	46.1133	147.682	146.435	119.999	126.114	147.193	35.544	143.999	24.3634	88.8409	65.0142	22.1615	58.2943	32.443	48.3356	49.2651	48.5938
1444001_at	---	---	6.65892	22.216	5.51115	4.95544	6.80845	173.668	5.40087	9.57271	6.45532	5.77352	19.0211	6.78286	6.87352	8.20473	8.24109	13.6011	6.14774	37.1644	7.08633	11.3055
1444114_at	---	---	72.6533	29.693	31.1318	21.5199	84.8474	94.3852	37.7737	56.3274	53.5811	23.9931	105.029	31.2894	59.8967	41.616	31.7591	60.2777	24.9123	26.8299	29.0168	84.8048
1444151_at	---	---	11.5091	18.2493	11.2467	17.5392	12.2474	231.029	123.489	17.4023	38.1103	16.6198	38.8226	7.86445	11.2631	7.83317	4.78901	13.2698	7.5161	4.48759	7.90018	7.67744
1444157_a_at	Kdm5c	20591	30.6028	22.6829	33.1592	11.9056	28.4355	17.2245	16.2792	20.1811	21.933	15.157	58.9003	14.0557	8.11018	8.27943	12.1612	10.155	61.1447	52.0456	87.2036	36.4387
1444251_x_at	D4Ertd111e	52427	13.6956	13.6631	13.566	12.5915	13.5319	19.7568	13.4651	14.4452	13.0084	12.4752	27.075	13.5524	13.7059	13.9334	13.693	13.2414	13.7459	13.6549	14.1347	13.7168
1444384_at	---	---	31.3512	30.2844	60.4096	37.8372	82.7582	290.629	64.2578	58.6555	239.753	47.3075	123.249	46.3425	331.066	35.1349	24.2402	65.8504	29.7196	18.1591	7.42577	31.3484
1444482_at	A130078K24Rik	399616	48.2024	35.2283	21.6346	21.4867	52.78	235.854	42.1901	27.0972	35.1881	9.52009	44.8164	23.2493	46.9857	26.8556	14.87	23.6322	11.1028	27.5363	21.5034	24.274
1444738_at	5730419I09Rik	74741	15.1276	39.1128	31.8607	13.2173	15.0583	147.959	36.292	15.5897	39.1682	13.2788	41.9202	8.48815	43.3454	9.37504	10.2454	21.1079	10.4818	9.91436	7.94033	11.3147
1444827_at	---	---	16.2505	17.6744	10.2855	15.5053	21.473	182.309	15.8721	18.4017	72.4537	8.61097	38.5645	13.8511	59.5444	13.5875	10.3477	18.4366	14.2906	39.1479	14.66	16.1893
1445211_at	---	---	49.0309	45.485	44.0896	31.1561	58.363	251.466	31.1169	43.918	202.77	33.0273	174.299	56.9982	327.29	58.5123	57.7478	230.95	44.7867	77.8553	80.6924	57.3941
1445229_at	Dgat1	13350	61.0909	96.02	56.0668	76.9099	78.3537	347.879	163.349	71.8388	112.749	78.8963	142.422	33.3046	69.2293	39.1707	34.5513	72.1827	34.4359	29.3232	25.5005	43.712
1445512_at	---	---	27.3265	26.4879	14.0389	17.3348	67.1974	128.474	34.4898	16.9799	26.1172	16.4579	44.1217	17.0548	21.1125	8.74867	8.84003	14.9578	11.7334	7.77542	9.05065	17.102
1445618_at	---	---	24.5169	24.4947	29.0575	54.8439	25.1803	43.819	57.6553	12.3621	117.878	27.7008	86.5384	26.2474	386.441	31.2824	25.0785	204.514	24.9872	27.1872	33.2428	28.7489
1445651_at	---	---	19.8086	10.1971	12.8538	8.84125	20.5568	40.6084	12.7511	16.3501	49.08	10.3212	34.6769	13.3676	22.0712	7.5718	7.85095	12.087	6.78027	4.35867	8.19501	8.16753
1445710_x_at	Duxbl	278672	34.9317	96.0048	50.3799	47.0466	52.0751	97.8477	49.809	71.5031	37.0096	26.4481	164.428	51.2736	51.0455	52.2437	51.5295	64.7523	52.6185	82.6573	54.6622	78.464
1446067_at	---	---	49.1357	66.6326	56.7518	57.7472	71.6539	346.885	89.6348	51.3774	243.584	65.9382	357.625	81.7141	634.229	50.1584	42.9615	279.669	49.3545	73.2508	55.9975	43.2441
1446168_at	LOC100041495	100041495	33.6892	33.5565	33.0466	23.2228	34.7267	44.7687	30.4412	33.3095	41.0884	28.5606	75.7399	32.8319	34.9043	36.1898	35.5944	35.866	36.2894	34.6274	36.7544	41.1744
1446182_at	---	---	6.22327	6.24481	6.2356	5.67855	7.71305	37.5817	6.05997	9.55369	68.2229	6.47848	21.9349	6.99288	62.5129	10.4319	7.31408	26.1442	6.37245	6.91834	7.74475	25.6417
1446219_at	D930015E06Rik	229473	47.5	31.755	50.9483	33.8698	56.2256	90.3656	52.5699	56.9814	70.5033	43.371	126.412	48.5936	47.113	29.7482	25.4428	24.4763	57.1024	64.6848	76.9976	71.9227
1446222_at	---	---	25.1663	58.0768	19.0499	14.9806	27.3583	183.804	28.3474	24.9681	43.6555	12.2502	52.9932	19.9256	50.3461	26.896	18.2366	60.5614	18.6959	44.6076	19.7821	29.2403
1446280_at	---	---	4.77923	7.10596	4.64615	7.11534	7.33611	7.10129	4.67468	11.3099	6.30388	6.5589	36.963	7.19651	7.09574	8.17256	8.39722	13.4712	11.9419	7.20551	7.47688	7.22018
1446330_at	---	---	6.61482	9.56037	6.54091	7.28807	8.22405	23.4565	7.69808	7.96805	31.5771	7.36718	20.7458	8.01213	44.017	8.40141	8.083	24.0256	8.10133	8.21689	8.40381	6.86073
1446384_at	---	---	7.93782	17.3745	6.04535	12.129	17.7794	58.5261	41.9596	6.11081	12.2787	7.98024	17.7644	5.38405	5.70666	5.69311	5.64884	5.37243	5.64279	5.51696	5.76204	6.27502
1446693_at	Frg1	14300	25.282	41.125	68.827	37.4775	23.7648	125.682	33.3733	34.5522	150.935	32.3221	93.3769	34.2198	140.154	18.5392	19.4855	53.0871	16.6868	21.4298	24.1624	46.9363
1446854_at	---	---	11.9624	11.9639	11.7899	10.6522	11.5184	11.4085	10.7284	11.9308	10.7347	11.0542	30.3996	11.8278	11.9283	12.4372	12.307	27.9269	14.5557	13.0816	15.3345	18.6931
[truncated: 74 more rows]

## Sheet: Set3
Probe Set ID	Gene Symbol	Entrez Gene ID	Spermatogonia-PRJB02	Spermatogonia-PRJB05	Spermatogonia-PRJ07	Spermatogonia-PRJB08	pre-Leptotene-PRJB02	pre-Leptotene-PRJB05	pre-Leptotene-PRJB08	Leptotene/Zygotene-PRJB02	Leptotene/Zygotene-PRJB06	Leptotene/Zygotene-PRJB08	early-Pachytene-PRJB05	mid-Pachytene-PRJB04	mid-Pachytene-PRJB06	late-Pachytene-PRJB02	Diplotene-PRJB04	Diplotene-PRJB06	Round Spermatids-PRJB04	Round Spermatids-PRJB05	Round Spermatids-PRJB06	Round Spermatids-PRJB08
[truncated: 544 more rows]

[truncated: 5 more sheets: Set4, Set5, Set6, Set7, Set8]
