# Supplementary material for: A Global Expression Switch Marks Pachytene Initiation during Mouse Male Meiosis
Source: Genes (Basel). 2010 Dec 13;1(3):469–83. doi: 10.3390/genes1030469 (PMC3966219; doi:10.3390/genes1030469)
Supplement: Supplementary File 2 — Supplementary Dataset S2 (XLS, 1109 KB) [file genes-01-00469-s002.xls]

## Sheet: Set1-GO
GO ACCESSION	GO Term	p-value	corrected p-value	Count in Selection	% Count in Selection	Count in Total	% Count in Total
GO:0050789	regulation of biological process	4.83699e-30	1.08082e-25	565	39.9576	4593	26.6709
GO:0050794	regulation of cellular process	6.11048e-30	1.08082e-25	511	36.1386	4021	23.3494
GO:0065007	biological regulation	4.51308e-28	5.32183e-24	588	41.5842	4919	28.564
GO:0005634	nucleus	1.10458e-24	9.76888e-21	556	39.3211	4706	27.3271
GO:0019222	regulation of metabolic process	2.90079e-22	2.05237e-18	368	26.0255	2819	16.3695
GO:0031323	regulation of cellular metabolic process	5.17899e-22	3.05353e-18	346	24.4696	2607	15.1385
GO:0003677	DNA binding	2.40152e-18	1.21366e-14	255	18.0339	1838	10.673
GO:0006139	nucleobase, nucleoside, nucleotide and nucleic acid metabolic process	3.64682e-18	1.61262e-14	379	26.8034	3089	17.9374
GO:0044424	intracellular part	5.7127e-18	1.79406e-14	997	70.5092	10328	59.9733
GO:0000402	crossed form four-way junction DNA binding	6.09475e-18	1.79406e-14	20	1.41443	25	0.145172
GO:0000401	open form four-way junction DNA binding	6.09475e-18	1.79406e-14	20	1.41443	25	0.145172
GO:0003681	bent DNA binding	6.09475e-18	1.79406e-14	20	1.41443	25	0.145172
GO:0043229	intracellular organelle	6.59283e-18	1.79406e-14	843	59.6181	8391	48.7254
GO:0043226	organelle	7.13339e-18	1.80251e-14	843	59.6181	8393	48.737
GO:0048518	positive regulation of biological process	1.51427e-17	3.57125e-14	228	16.1245	1606	9.32582
GO:0043227	membrane-bound organelle	1.63362e-17	3.61193e-14	768	54.314	7503	43.5689
GO:0043231	intracellular membrane-bound organelle	2.33225e-17	4.1059e-14	767	54.2433	7500	43.5515
GO:0031329	regulation of cellular catabolic process	2.43735e-17	4.1059e-14	20	1.41443	26	0.150978
GO:0005981	regulation of glycogen catabolic process	2.43735e-17	4.1059e-14	20	1.41443	26	0.150978
GO:0031331	positive regulation of cellular catabolic process	2.43735e-17	4.1059e-14	20	1.41443	26	0.150978
GO:0045819	positive regulation of glycogen catabolic process	2.43735e-17	4.1059e-14	20	1.41443	26	0.150978
GO:0048856	anatomical structure development	3.41223e-17	5.48687e-14	199	14.0735	1346	7.81604
GO:0019219	regulation of nucleobase, nucleoside, nucleotide and nucleic acid metabolic process	6.31869e-17	9.71869e-14	300	21.2164	2330	13.53
GO:0045449	regulation of transcription	1.33028e-16	1.92884e-13	291	20.5799	2252	13.0771
GO:0006355	regulation of transcription, DNA-dependent	1.3631e-16	1.92884e-13	276	19.5191	2103	12.2118
GO:0003676	nucleic acid binding	3.76989e-16	5.12937e-13	367	25.9547	3050	17.7109
GO:0000400	four-way junction DNA binding	8.33415e-16	1.0913e-12	20	1.41443	29	0.168399
GO:0048522	positive regulation of cellular process	8.63763e-16	1.0913e-12	192	13.5785	1322	7.67667
GO:0050793	regulation of developmental process	1.01719e-15	1.24083e-12	90	6.36492	449	2.60728
GO:0030295	protein kinase activator activity	3.14842e-15	3.71261e-12	22	1.55587	37	0.214854
GO:0045637	regulation of myeloid cell differentiation	4.15535e-15	4.74193e-12	33	2.3338	84	0.487777
GO:0000217	DNA secondary structure binding	4.5324e-15	5.01057e-12	21	1.48515	34	0.197433
GO:0048731	system development	1.61477e-14	1.73104e-11	74	5.23338	348	2.02079
GO:0009896	positive regulation of catabolic process	1.7445e-14	1.76324e-11	23	1.62659	43	0.249695
GO:0019209	kinase activator activity	1.7445e-14	1.76324e-11	23	1.62659	43	0.249695
GO:0045639	positive regulation of myeloid cell differentiation	1.80723e-14	1.7759e-11	25	1.76803	51	0.29615
GO:0043566	structure-specific DNA binding	3.02126e-14	2.88865e-11	37	2.61669	110	0.638755
GO:0045931	positive regulation of progression through mitotic cell cycle	3.46075e-14	3.22177e-11	20	1.41443	33	0.191627
GO:0030335	positive regulation of cell migration	6.31555e-14	5.72869e-11	30	2.12164	76	0.441322
GO:0045595	regulation of cell differentiation	1.2291e-13	1.08701e-10	68	4.80905	317	1.84078
GO:0006350	transcription	1.34037e-13	1.15651e-10	232	16.4074	1779	10.3304
GO:0050930	induction of positive chemotaxis	1.67059e-13	1.40711e-10	20	1.41443	35	0.20324
GO:0030324	lung development	1.73926e-13	1.43088e-10	36	2.54597	110	0.638755
GO:0006109	regulation of carbohydrate metabolic process	2.03855e-13	1.63899e-10	21	1.48515	39	0.226468
GO:0045913	positive regulation of carbohydrate metabolic process	3.46934e-13	2.72736e-10	20	1.41443	36	0.209047
GO:0050920	regulation of chemotaxis	3.96067e-13	2.91901e-10	21	1.48515	40	0.232275
GO:0050921	positive regulation of chemotaxis	3.96067e-13	2.91901e-10	21	1.48515	40	0.232275
GO:0032392	DNA geometric change	3.96067e-13	2.91901e-10	21	1.48515	40	0.232275
GO:0019207	kinase regulator activity	4.48261e-13	3.18797e-10	34	2.40453	102	0.5923
GO:0051272	positive regulation of cell motility	4.59596e-13	3.18797e-10	30	2.12164	81	0.470356
GO:0040017	positive regulation of locomotion	4.59596e-13	3.18797e-10	30	2.12164	81	0.470356
GO:0019887	protein kinase regulator activity	6.30107e-13	4.28666e-10	31	2.19236	87	0.505197
GO:0009653	anatomical structure morphogenesis	6.63713e-13	4.43009e-10	142	10.0424	947	5.4991
GO:0002053	positive regulation of mesenchymal cell proliferation	7.27497e-13	4.76591e-10	22	1.55587	45	0.261309
GO:0009893	positive regulation of metabolic process	9.25122e-13	5.95038e-10	117	8.2744	729	4.2332
GO:0050927	positive regulation of positive chemotaxis	1.35805e-12	8.42851e-10	20	1.41443	38	0.220661
GO:0050926	regulation of positive chemotaxis	1.35805e-12	8.42851e-10	20	1.41443	38	0.220661
GO:0030334	regulation of cell migration	1.52926e-12	9.32743e-10	38	2.68741	129	0.749085
GO:0048513	organ development	2.44401e-12	1.46541e-09	125	8.84017	810	4.70356
GO:0051270	regulation of cell motility	3.30104e-12	1.94629e-09	39	2.75813	138	0.801347
GO:0040012	regulation of locomotion	1.40461e-11	8.14582e-09	39	2.75813	144	0.836188
GO:0032502	developmental process	1.43288e-11	8.17575e-09	342	24.1867	3007	17.4612
GO:0005488	binding	1.54889e-11	8.69739e-09	1092	77.2277	11985	69.5953
GO:0045597	positive regulation of cell differentiation	1.77165e-11	9.79279e-09	39	2.75813	145	0.841995
GO:0005515	protein binding	3.57615e-11	1.94631e-08	690	48.7977	6983	40.5493
GO:0048519	negative regulation of biological process	3.97834e-11	2.13239e-08	185	13.0835	1411	8.19348
GO:0031325	positive regulation of cellular metabolic process	4.723e-11	2.49374e-08	105	7.42574	667	3.87318
GO:0045787	positive regulation of progression through cell cycle	4.97097e-11	2.58607e-08	24	1.69731	63	0.365832
GO:0051094	positive regulation of developmental process	5.43747e-11	2.78777e-08	44	3.11174	183	1.06266
GO:0007399	nervous system development	9.32181e-11	4.71097e-08	51	3.60679	235	1.36461
GO:0051726	regulation of cell cycle	2.0069e-10	9.99946e-08	68	4.80905	370	2.14854
GO:0005737	cytoplasm	2.48846e-10	1.22266e-07	441	31.1881	4166	24.1914
GO:0016043	cellular component organization and biogenesis	2.58618e-10	1.25327e-07	231	16.3366	1906	11.0679
GO:0008047	enzyme activator activity	2.88964e-10	1.3814e-07	57	4.03112	287	1.66657
GO:0007423	sensory organ development	3.21827e-10	1.51799e-07	28	1.9802	90	0.522618
GO:0051384	response to glucocorticoid stimulus	3.38297e-10	1.57468e-07	21	1.48515	53	0.307764
GO:0001654	eye development	3.45257e-10	1.58621e-07	26	1.83876	79	0.458742
GO:0009894	regulation of catabolic process	4.51553e-10	2.04796e-07	24	1.69731	69	0.400674
GO:0007346	regulation of progression through mitotic cell cycle	1.08313e-09	4.85021e-07	22	1.55587	61	0.354219
GO:0043283	biopolymer metabolic process	1.29344e-09	5.7196e-07	330	23.338	2988	17.3509
GO:0042127	regulation of cell proliferation	1.99926e-09	8.73157e-07	92	6.50636	595	3.45508
GO:0042476	odontogenesis	2.15489e-09	9.29649e-07	18	1.27298	43	0.249695
GO:0048523	negative regulation of cellular process	2.23702e-09	9.53456e-07	166	11.7397	1293	7.50827
GO:0003700	transcription factor activity	5.04377e-09	2.12415e-06	108	7.63791	751	4.36095
GO:0000074	regulation of progression through cell cycle	6.54309e-09	2.72316e-06	58	4.10184	319	1.85239
GO:0044238	primary metabolic process	9.09505e-09	3.68161e-06	675	47.7369	6994	40.6132
GO:0006521	regulation of amino acid metabolic process	9.15823e-09	3.68161e-06	31	2.19236	122	0.708437
GO:0001932	regulation of protein amino acid phosphorylation	9.15823e-09	3.68161e-06	31	2.19236	122	0.708437
GO:0044464	cell part	1.029e-08	4.09011e-06	1226	86.7044	14001	81.3019
GO:0065009	regulation of a molecular function	1.07837e-08	4.23872e-06	79	5.58699	500	2.90343
GO:0048545	response to steroid hormone stimulus	1.27604e-08	4.96056e-06	27	1.90948	98	0.569073
GO:0005625	soluble fraction	1.49221e-08	5.73787e-06	32	2.26308	131	0.760699
GO:0008201	heparin binding	1.7342e-08	6.59667e-06	29	2.05092	112	0.650369
GO:0000902	cell morphogenesis	1.9055e-08	7.17116e-06	47	3.3239	241	1.39945
GO:0045764	positive regulation of amino acid metabolic process	2.24677e-08	8.21094e-06	24	1.69731	82	0.476163
GO:0001934	positive regulation of protein amino acid phosphorylation	2.24677e-08	8.21094e-06	24	1.69731	82	0.476163
GO:0022402	cell cycle process	2.25142e-08	8.21094e-06	97	6.85997	670	3.8906
GO:0042475	odontogenesis (sensu Vertebrata)	2.4008e-08	8.6664e-06	16	1.13154	39	0.226468
GO:0051093	negative regulation of developmental process	2.9574e-08	1.05678e-05	39	2.75813	184	1.06846
GO:0019220	regulation of phosphate metabolic process	4.75574e-08	1.66573e-05	34	2.40453	151	0.876836
GO:0051174	regulation of phosphorus metabolic process	4.75574e-08	1.66573e-05	34	2.40453	151	0.876836
GO:0005539	glycosaminoglycan binding	6.75398e-08	2.32581e-05	32	2.26308	139	0.807154
GO:0042325	regulation of phosphorylation	6.77179e-08	2.32581e-05	33	2.3338	146	0.847802
GO:0007167	enzyme linked receptor protein signaling pathway	7.8237e-08	2.66126e-05	46	3.25318	244	1.41687
GO:0030247	polysaccharide binding	8.05438e-08	2.71364e-05	33	2.3338	147	0.853609
GO:0030528	transcription regulator activity	1.01048e-07	3.37233e-05	151	10.6789	1214	7.04953
GO:0006259	DNA metabolic process	1.29697e-07	4.28801e-05	99	7.00141	713	4.14029
GO:0045941	positive regulation of transcription	1.37436e-07	4.5018e-05	76	5.37482	503	2.92085
GO:0050790	regulation of catalytic activity	1.56372e-07	5.07505e-05	72	5.09194	469	2.72342
GO:0045596	negative regulation of cell differentiation	1.79435e-07	5.77063e-05	34	2.40453	159	0.923291
GO:0005694	chromosome	1.82851e-07	5.82751e-05	44	3.11174	235	1.36461
GO:0008270	zinc ion binding	2.10177e-07	6.6386e-05	235	16.6195	2100	12.1944
GO:0006357	regulation of transcription from RNA polymerase II promoter	2.41634e-07	7.56463e-05	86	6.08204	601	3.48993
GO:0044237	cellular metabolic process	2.44444e-07	7.58549e-05	672	47.5248	7086	41.1474
GO:0001871	pattern binding	3.01491e-07	9.2744e-05	33	2.3338	155	0.900064
GO:0045935	positive regulation of nucleobase, nucleoside, nucleotide and nucleic acid metabolic process	3.56431e-07	0.000108699	78	5.51627	533	3.09506
GO:0009987	cellular process	4.63405e-07	0.000140115	964	68.1754	10701	62.1392
GO:0016477	cell migration	4.70142e-07	0.000140947	51	3.60679	300	1.74206
GO:0009887	organ morphogenesis	4.74845e-07	0.00014116	66	4.66761	429	2.49114
GO:0045893	positive regulation of transcription, DNA-dependent	5.0939e-07	0.000150168	65	4.59689	421	2.44469
GO:0030234	enzyme regulator activity	6.03814e-07	0.000176533	100	7.07214	746	4.33192
GO:0046914	transition metal ion binding	7.65757e-07	0.000222044	277	19.5898	2589	15.034
GO:0043005	neuron projection	1.06702e-06	0.000306887	37	2.61669	194	1.12653
GO:0006996	organelle organization and biogenesis	1.52901e-06	0.000436212	142	10.0424	1178	6.84049
GO:0006928	cell motility	1.67134e-06	0.000473002	55	3.88967	347	2.01498
GO:0007169	transmembrane receptor protein tyrosine kinase signaling pathway	1.78127e-06	0.000500112	33	2.3338	167	0.969746
GO:0009725	response to hormone stimulus	1.86613e-06	0.000519814	34	2.40453	175	1.0162
GO:0045859	regulation of protein kinase activity	2.9124e-06	0.000798787	37	2.61669	202	1.17299
GO:0043549	regulation of kinase activity	2.91281e-06	0.000798787	38	2.68741	210	1.21944
GO:0051338	regulation of transferase activity	3.64125e-06	0.000990867	39	2.75813	220	1.27751
GO:0008152	metabolic process	4.16999e-06	0.00112609	700	49.505	7546	43.8186
GO:0005524	ATP binding	5.55606e-06	0.00148902	170	12.0226	1497	8.69288
GO:0003682	chromatin binding	8.77027e-06	0.00233276	29	2.05092	148	0.859416
GO:0035239	tube morphogenesis	9.13848e-06	0.00241256	20	1.41443	83	0.48197
GO:0030554	adenyl nucleotide binding	2.09709e-05	0.0054953	175	12.3762	1585	9.20388
GO:0008284	positive regulation of cell proliferation	2.41079e-05	0.00627089	53	3.74823	361	2.09628
GO:0009790	embryonic development	2.64322e-05	0.00682529	44	3.11174	282	1.63754
GO:0030029	actin filament-based process	2.81988e-05	0.0072287	38	2.68741	231	1.34139
GO:0007049	cell cycle	2.85426e-05	0.00726419	69	4.87977	512	2.97311
GO:0043687	post-translational protein modification	3.73768e-05	0.00944459	124	8.76945	1065	6.18431
GO:0043067	regulation of programmed cell death	4.44015e-05	0.01114	78	5.51627	606	3.51896
GO:0043392	negative regulation of DNA binding	4.52763e-05	0.0112795	4	0.282885	4	0.0232275
GO:0006793	phosphorus metabolic process	4.9187e-05	0.0120836	94	6.64781	766	4.44806
GO:0006796	phosphate metabolic process	4.9187e-05	0.0120836	94	6.64781	766	4.44806
GO:0043412	biopolymer modification	5.17484e-05	0.012586	154	10.8911	1387	8.05412
GO:0043085	positive regulation of enzyme activity	5.19436e-05	0.012586	39	2.75813	246	1.42849
GO:0042995	cell projection	6.10931e-05	0.0147022	70	4.9505	534	3.10087
GO:0048598	embryonic morphogenesis	6.42329e-05	0.0153534	33	2.3338	197	1.14395
GO:0009966	regulation of signal transduction	6.48055e-05	0.0153863	70	4.9505	535	3.10667
GO:0021884	forebrain neuron development	6.76177e-05	0.015947	5	0.353607	7	0.040648
GO:0005622	intracellular	7.12962e-05	0.0167031	212	14.9929	2022	11.7415
GO:0043167	ion binding	7.5626e-05	0.017601	383	27.0863	3948	22.9255
GO:0046872	metal ion binding	7.63075e-05	0.0176435	376	26.5912	3868	22.4609
GO:0042981	regulation of apoptosis	7.97458e-05	0.0183187	76	5.37482	597	3.4667
GO:0032259	methylation	8.05122e-05	0.0183755	17	1.20226	74	0.429708
GO:0030154	cell differentiation	8.49883e-05	0.0191785	119	8.41584	1033	5.99849
GO:0043565	sequence-specific DNA binding	8.51147e-05	0.0191785	69	4.87977	530	3.07764
GO:0030036	actin cytoskeleton organization and biogenesis	8.65821e-05	0.0193856	35	2.47525	217	1.26009
GO:0006073	glucan metabolic process	8.79152e-05	0.019438	10	0.707214	30	0.174206
GO:0005977	glycogen metabolic process	8.79152e-05	0.019438	10	0.707214	30	0.174206
GO:0044428	nuclear part	9.12217e-05	0.0200439	141	9.97171	1265	7.34568
GO:0006469	negative regulation of protein kinase activity	0.00010445	0.0228088	14	0.990099	55	0.319377
GO:0030155	regulation of cell adhesion	0.000114628	0.0248371	17	1.20226	76	0.441322
GO:0007507	heart development	0.000115752	0.0248371	28	1.9802	161	0.934905
GO:0009719	response to endogenous stimulus	0.000115845	0.0248371	64	4.52617	487	2.82794
GO:0005856	cytoskeleton	0.000116718	0.0248735	71	5.02122	555	3.22281
GO:0045944	positive regulation of transcription from RNA polymerase II promoter	0.000126658	0.0268303	50	3.53607	356	2.06724
GO:0007242	intracellular signaling cascade	0.000131748	0.0277424	105	7.42574	899	5.22037
GO:0048754	branching morphogenesis of a tube	0.000137864	0.0288584	16	1.13154	70	0.40648
GO:0006730	one-carbon compound metabolic process	0.000142838	0.0297237	21	1.48515	107	0.621334
GO:0016563	transcriptional activator activity	0.000147902	0.0304806	39	2.75813	258	1.49817
GO:0016301	kinase activity	0.000148198	0.0304806	98	6.93069	830	4.8197
GO:0045892	negative regulation of transcription, DNA-dependent	0.000161424	0.0330088	42	2.9703	286	1.66076
GO:0043414	biopolymer methylation	0.000164118	0.0331763	15	1.06082	64	0.371639
GO:0016331	morphogenesis of embryonic epithelium	0.000164118	0.0331763	15	1.06082	64	0.371639
GO:0000146	microfilament motor activity	0.000168067	0.0337814	5	0.353607	8	0.0464549
GO:0008092	cytoskeletal protein binding	0.00017198	0.0343727	58	4.10184	436	2.53179
GO:0007411	axon guidance	0.00017963	0.0356999	20	1.41443	101	0.586493
GO:0043232	intracellular non-membrane-bound organelle	0.000181659	0.0357021	179	12.6591	1693	9.83102
GO:0043228	non-membrane-bound organelle	0.000181659	0.0357021	179	12.6591	1693	9.83102
GO:0043069	negative regulation of programmed cell death	0.000189239	0.0369862	41	2.89958	279	1.62011
GO:0051348	negative regulation of transferase activity	0.000192799	0.037475	14	0.990099	58	0.336798
GO:0016310	phosphorylation	0.000205672	0.0397587	76	5.37482	615	3.57122
GO:0043169	cation binding	0.000206964	0.0397911	346	24.4696	3569	20.7247
GO:0001725	stress fiber	0.000227394	0.0432488	8	0.565771	22	0.127751
GO:0035097	histone methyltransferase complex	0.000227394	0.0432488	8	0.565771	22	0.127751
GO:0031941	filamentous actin	0.000230804	0.0436627	7	0.495049	17	0.0987167
GO:0042221	response to chemical stimulus	0.000259849	0.0488958	83	5.86987	690	4.00674
GO:0007010	cytoskeleton organization and biogenesis	0.000264994	0.0496001	66	4.66761	521	3.02538
GO:0001701	embryonic development (sensu Mammalia)	0.000283172	0.0524683	29	2.05092	178	1.03362
GO:0006112	energy reserve metabolic process	0.000283284	0.0524683	10	0.707214	34	0.197433
GO:0044451	nucleoplasm part	0.000299743	0.0552276	68	4.80905	543	3.15313
GO:0045860	positive regulation of protein kinase activity	0.000308812	0.0566037	24	1.69731	137	0.79554
GO:0005938	cell cortex	0.000311937	0.0568819	12	0.848656	47	0.272923
GO:0001892	embryonic placenta development	0.000323713	0.0584269	8	0.565771	23	0.133558
GO:0032432	actin filament bundle	0.000323713	0.0584269	8	0.565771	23	0.133558
GO:0030099	myeloid cell differentiation	0.000326544	0.0586387	18	1.27298	90	0.522618
GO:0030097	hemopoiesis	0.000334354	0.0597378	15	1.06082	68	0.394867
GO:0000122	negative regulation of transcription from RNA polymerase II promoter	0.000342534	0.0608919	32	2.26308	206	1.19621
GO:0009792	embryonic development (sensu Metazoa)	0.000348813	0.0614322	33	2.3338	215	1.24848
GO:0009250	glucan biosynthetic process	0.00035252	0.0614322	5	0.353607	9	0.0522618
GO:0021953	central nervous system neuron differentiation	0.00035252	0.0614322	5	0.353607	9	0.0522618
GO:0005978	glycogen biosynthetic process	0.00035252	0.0614322	5	0.353607	9	0.0522618
GO:0006468	protein amino acid phosphorylation	0.000391569	0.0679027	72	5.09194	588	3.41444
GO:0035108	limb morphogenesis	0.000432608	0.0742534	18	1.27298	92	0.534231
GO:0035107	appendage morphogenesis	0.000432608	0.0742534	18	1.27298	92	0.534231
GO:0002573	myeloid leukocyte differentiation	0.000434488	0.0742534	11	0.777935	42	0.243888
GO:0000166	nucleotide binding	0.000441109	0.0750225	225	15.9123	2232	12.9609
GO:0019899	enzyme binding	0.000470415	0.0796238	40	2.82885	282	1.63754
GO:0030864	cortical actin cytoskeleton	0.000511179	0.0857036	6	0.424328	14	0.0812961
GO:0008045	motor axon guidance	0.000511179	0.0857036	6	0.424328	14	0.0812961
GO:0043009	embryonic development (sensu Vertebrata)	0.000526942	0.0879296	32	2.26308	211	1.22525
GO:0043066	negative regulation of apoptosis	0.0005521	0.0909069	39	2.75813	275	1.59689
GO:0030857	negative regulation of epithelial cell differentiation	0.000552493	0.0909069	3	0.212164	3	0.0174206
GO:0021910	smoothened signaling pathway in ventral spinal cord patterning	0.000552493	0.0909069	3	0.212164	3	0.0174206
GO:0051347	positive regulation of transferase activity	0.000565346	0.0925911	25	1.76803	151	0.876836
GO:0016772	transferase activity, transferring phosphorus-containing groups	0.000570979	0.0930827	108	7.63791	967	5.61524
GO:0006464	protein modification	0.000579534	0.0940439	141	9.97171	1319	7.65925
GO:0016740	transferase activity	0.000583242	0.0942135	180	12.7298	1744	10.1272
GO:0016481	negative regulation of transcription	0.000588242	0.0945254	49	3.46535	370	2.14854
GO:0051100	negative regulation of binding	0.000593189	0.0945254	4	0.282885	6	0.0348412
GO:0005883	neurofilament	0.000593189	0.0945254	4	0.282885	6	0.0348412
GO:0016773	phosphotransferase activity, alcohol group as acceptor	0.000601502	0.0954204	80	5.65771	678	3.93705
GO:0044422	organelle part	0.000629959	0.0990463	369	26.0962	3888	22.5771
GO:0044446	intracellular organelle part	0.000629959	0.0990463	369	26.0962	3888	22.5771
GO:0048568	embryonic organ development	0.00063282	0.0990559	9	0.636492	31	0.180013
GO:0046983	protein dimerization activity	0.000667121	0.103965	52	3.67751	401	2.32855
GO:0001763	morphogenesis of a branching structure	0.000686883	0.106575	16	1.13154	80	0.464549
GO:0051276	chromosome organization and biogenesis	0.000698954	0.107925	55	3.88967	431	2.50276
GO:0003779	actin binding	0.000701682	0.107925	41	2.89958	297	1.72464
GO:0002009	morphogenesis of an epithelium	0.000718914	0.110097	17	1.20226	88	0.511004
GO:0016568	chromatin modification	0.000729808	0.111283	34	2.40453	233	1.353
GO:0051128	regulation of cell organization and biogenesis	0.00078588	0.119319	22	1.55587	129	0.749085
GO:0007243	protein kinase cascade	0.000791016	0.119375	26	1.83876	163	0.946519
GO:0021954	central nervous system neuron development	0.000793002	0.119375	6	0.424328	15	0.087103
GO:0048666	neuron development	0.000820081	0.122929	11	0.777935	45	0.261309
GO:0015629	actin cytoskeleton	0.000862875	0.128798	15	1.06082	74	0.429708
GO:0048534	hemopoietic or lymphoid organ development	0.000904411	0.133868	21	1.48515	122	0.708437
GO:0002520	immune system development	0.000904411	0.133868	21	1.48515	122	0.708437
GO:0043122	regulation of I-kappaB kinase/NF-kappaB cascade	0.000927188	0.1361	14	0.990099	67	0.38906
GO:0009791	post-embryonic development	0.000927188	0.1361	14	0.990099	67	0.38906
GO:0004672	protein kinase activity	0.00093799	0.137117	68	4.80905	566	3.28668
GO:0048869	cellular developmental process	0.00102547	0.149289	155	10.9618	1490	8.65223
GO:0009892	negative regulation of metabolic process	0.00104229	0.151115	65	4.59689	538	3.12409
GO:0044430	cytoskeletal part	0.00105935	0.152962	88	6.22348	774	4.49451
GO:0035162	embryonic hemopoiesis	0.00112382	0.160957	5	0.353607	11	0.0638755
GO:0042551	neuron maturation	0.00112382	0.160957	5	0.353607	11	0.0638755
GO:0043123	positive regulation of I-kappaB kinase/NF-kappaB cascade	0.0011511	0.164199	13	0.919378	61	0.354219
GO:0051015	actin filament binding	0.00120893	0.171607	11	0.777935	47	0.272923
GO:0017076	purine nucleotide binding	0.00121274	0.171607	195	13.7907	1938	11.2537
GO:0045786	negative regulation of progression through cell cycle	0.00124665	0.175703	26	1.83876	168	0.975553
GO:0001843	neural tube closure	0.00131577	0.184709	9	0.636492	34	0.197433
GO:0031324	negative regulation of cellular metabolic process	0.00140739	0.19679	58	4.10184	474	2.75245
GO:0008286	insulin receptor signaling pathway	0.00141738	0.197406	8	0.565771	28	0.162592
GO:0045934	negative regulation of nucleobase, nucleoside, nucleotide and nucleic acid metabolic process	0.00142342	0.19747	50	3.53607	395	2.29371
GO:0030326	embryonic limb morphogenesis	0.00151606	0.207877	15	1.06082	78	0.452935
GO:0035091	phosphoinositide binding	0.00151606	0.207877	15	1.06082	78	0.452935
GO:0035113	embryonic appendage morphogenesis	0.00151606	0.207877	15	1.06082	78	0.452935
GO:0016569	covalent chromatin modification	0.00157421	0.215016	13	0.919378	63	0.365832
GO:0030879	mammary gland development	0.00164395	0.222821	9	0.636492	35	0.20324
GO:0042552	myelination	0.00164395	0.222821	9	0.636492	35	0.20324
GO:0043405	regulation of MAPK activity	0.0017426	0.23529	17	1.20226	95	0.551652
GO:0008150	biological_process	0.00177157	0.238293	1130	79.9151	13223	76.7842
GO:0045736	negative regulation of cyclin-dependent protein kinase activity	0.00179683	0.240775	5	0.353607	12	0.0696824
GO:0035137	hindlimb morphogenesis	0.00181821	0.242721	8	0.565771	29	0.168399
GO:0048468	cell development	0.00186473	0.247994	77	5.44554	674	3.91383
GO:0021700	developmental maturation	0.00197339	0.261463	15	1.06082	80	0.464549
GO:0002521	leukocyte differentiation	0.00206091	0.263938	21	1.48515	130	0.754892
GO:0019904	protein domain specific binding	0.00206219	0.263938	33	2.3338	238	1.38203
GO:0050432	catecholamine secretion	0.00207414	0.263938	3	0.212164	4	0.0232275
GO:0042921	glucocorticoid receptor signaling pathway	0.00207414	0.263938	3	0.212164	4	0.0232275
GO:0031958	corticosteroid receptor signaling pathway	0.00207414	0.263938	3	0.212164	4	0.0232275
GO:0051171	regulation of nitrogen metabolic process	0.00207414	0.263938	3	0.212164	4	0.0232275
GO:0042800	histone lysine N-methyltransferase activity (H3-K4 specific)	0.00207414	0.263938	3	0.212164	4	0.0232275
GO:0014037	Schwann cell differentiation	0.00207414	0.263938	3	0.212164	4	0.0232275
GO:0035140	arm morphogenesis	0.00207414	0.263938	3	0.212164	4	0.0232275
GO:0032234	regulation of calcium ion transport via store-operated calcium channel	0.00207414	0.263938	3	0.212164	4	0.0232275
GO:0035117	embryonic arm morphogenesis	0.00207414	0.263938	3	0.212164	4	0.0232275
GO:0007417	central nervous system development	0.00210109	0.266409	10	0.707214	43	0.249695
GO:0003674	molecular_function	0.00215997	0.272897	1246	88.1188	14738	85.5816
GO:0048469	cell maturation	0.0022066	0.27681	14	0.990099	73	0.423901
GO:0001764	neuron migration	0.0022066	0.27681	14	0.990099	73	0.423901
GO:0043086	negative regulation of enzyme activity	0.00224192	0.280247	15	1.06082	81	0.470356
GO:0008285	negative regulation of cell proliferation	0.00226084	0.281618	32	2.26308	230	1.33558
GO:0030695	GTPase regulator activity	0.00233068	0.289298	45	3.18246	355	2.06144
GO:0030968	unfolded protein response	0.00237376	0.293165	6	0.424328	18	0.104524
GO:0000188	inactivation of MAPK activity	0.00241983	0.293165	4	0.282885	8	0.0464549
GO:0004176	ATP-dependent peptidase activity	0.00241983	0.293165	4	0.282885	8	0.0464549
GO:0031398	positive regulation of protein ubiquitination	0.00241983	0.293165	4	0.282885	8	0.0464549
GO:0014066	regulation of phosphoinositide 3-kinase cascade	0.00241983	0.293165	4	0.282885	8	0.0464549
GO:0043491	protein kinase B signaling cascade	0.00241983	0.293165	4	0.282885	8	0.0464549
GO:0045995	regulation of embryonic development	0.00241983	0.293165	4	0.282885	8	0.0464549
GO:0045785	positive regulation of cell adhesion	0.00246531	0.297655	7	0.495049	24	0.139365
GO:0008366	axon ensheathment	0.00249578	0.299291	9	0.636492	37	0.214854
GO:0007272	ensheathment of neurons	0.00249578	0.299291	9	0.636492	37	0.214854
GO:0016504	protease activator activity	0.00272369	0.323333	5	0.353607	13	0.0754892
GO:0030856	regulation of epithelial cell differentiation	0.00272369	0.323333	5	0.353607	13	0.0754892
GO:0031532	actin cytoskeleton reorganization	0.00272369	0.323333	5	0.353607	13	0.0754892
GO:0000785	chromatin	0.00279773	0.331012	19	1.34371	116	0.673596
GO:0016458	gene silencing	0.00300881	0.354798	10	0.707214	45	0.261309
GO:0008134	transcription factor binding	0.0030513	0.358614	40	2.82885	311	1.80593
GO:0007001	chromosome organization and biogenesis (sensu Eukaryota)	0.00309298	0.362309	48	3.39463	390	2.26468
GO:0048593	camera-type eye morphogenesis	0.00318462	0.370589	7	0.495049	25	0.145172
GO:0031032	actomyosin structure organization and biogenesis	0.00318462	0.370589	7	0.495049	25	0.145172
GO:0005070	SH3/SH2 adaptor activity	0.00323093	0.373987	6	0.424328	19	0.11033
GO:0051789	response to protein stimulus	0.00323497	0.373987	15	1.06082	84	0.487777
GO:0016741	transferase activity, transferring one-carbon groups	0.00336979	0.388305	25	1.76803	171	0.992974
GO:0006479	protein amino acid methylation	0.00366452	0.419534	9	0.636492	39	0.226468
GO:0008213	protein amino acid alkylation	0.00366452	0.419534	9	0.636492	39	0.226468
GO:0048646	anatomical structure formation	0.00382824	0.436864	27	1.90948	191	1.10911
GO:0042593	glucose homeostasis	0.00391303	0.444812	11	0.777935	54	0.313571
GO:0000267	cell fraction	0.00393625	0.444812	76	5.37482	683	3.96609
GO:0005768	endosome	0.00394498	0.444812	35	2.47525	267	1.55043
GO:0005057	receptor signaling protein activity	0.00394819	0.444812	16	1.13154	94	0.545845
GO:0000079	regulation of cyclin-dependent protein kinase activity	0.00405363	0.450346	7	0.495049	26	0.150978
GO:0035035	histone acetyltransferase binding	0.00407369	0.450346	4	0.282885	9	0.0522618
GO:0046626	regulation of insulin receptor signaling pathway	0.00407369	0.450346	4	0.282885	9	0.0522618
GO:0042640	anagen	0.00407369	0.450346	4	0.282885	9	0.0522618
GO:0048011	nerve growth factor receptor signaling pathway	0.00407369	0.450346	4	0.282885	9	0.0522618
GO:0030517	negative regulation of axon extension	0.00407369	0.450346	4	0.282885	9	0.0522618
GO:0010008	endosome membrane	0.00421972	0.465036	20	1.41443	129	0.749085
GO:0009967	positive regulation of signal transduction	0.00424763	0.466659	25	1.76803	174	1.01039
GO:0051301	cell division	0.00434676	0.476071	37	2.61669	288	1.67238
GO:0022404	molting cycle process	0.00439047	0.477899	9	0.636492	40	0.232275
GO:0022405	hair cycle process	0.00439047	0.477899	9	0.636492	40	0.232275
GO:0030246	carbohydrate binding	0.00454144	0.492816	41	2.89958	328	1.90465
GO:0006897	endocytosis	0.00463538	0.499943	24	1.69731	166	0.963939
GO:0010324	membrane invagination	0.00463538	0.499943	24	1.69731	166	0.963939
GO:0005384	manganese ion transporter activity	0.00486803	0.514064	3	0.212164	5	0.0290343
GO:0006828	manganese ion transport	0.00486803	0.514064	3	0.212164	5	0.0290343
GO:0048532	organization of an anatomical structure	0.00486803	0.514064	3	0.212164	5	0.0290343
GO:0001957	intramembranous ossification	0.00486803	0.514064	3	0.212164	5	0.0290343
GO:0007431	salivary gland development	0.00486803	0.514064	3	0.212164	5	0.0290343
GO:0048596	embryonic eye morphogenesis (sensu Actinopterygii)	0.00486803	0.514064	3	0.212164	5	0.0290343
GO:0006346	methylation-dependent chromatin silencing	0.00486803	0.514064	3	0.212164	5	0.0290343
GO:0044440	endosomal part	0.00503443	0.529694	20	1.41443	131	0.760699
GO:0006325	establishment and/or maintenance of chromatin architecture	0.00506831	0.529694	42	2.9703	340	1.97433
GO:0006323	DNA packaging	0.00506831	0.529694	42	2.9703	340	1.97433
GO:0051130	positive regulation of cell organization and biogenesis	0.00509091	0.529694	7	0.495049	27	0.156785
GO:0045638	negative regulation of myeloid cell differentiation	0.00509091	0.529694	7	0.495049	27	0.156785
GO:0007059	chromosome segregation	0.00532748	0.551067	8	0.565771	34	0.197433
GO:0003705	RNA polymerase II transcription factor activity, enhancer binding	0.00532748	0.551067	8	0.565771	34	0.197433
GO:0008168	methyltransferase activity	0.00539588	0.556515	24	1.69731	168	0.975553
GO:0005637	nuclear inner membrane	0.00553279	0.568976	5	0.353607	15	0.087103
GO:0042060	wound healing	0.00560656	0.574892	6	0.424328	21	0.121944
GO:0005730	nucleolus	0.00562948	0.575574	32	2.26308	244	1.41687
GO:0016798	hydrolase activity, acting on glycosyl bonds	0.00581604	0.592935	18	1.27298	115	0.667789
GO:0042303	molting cycle	0.00617427	0.627646	9	0.636492	42	0.243888
GO:0008637	apoptotic mitochondrial changes	0.00631542	0.634693	7	0.495049	28	0.162592
GO:0048009	insulin-like growth factor receptor signaling pathway	0.00635124	0.634693	4	0.282885	10	0.0580686
GO:0045671	negative regulation of osteoclast differentiation	0.00635124	0.634693	4	0.282885	10	0.0580686
GO:0004861	cyclin-dependent protein kinase inhibitor activity	0.00635124	0.634693	4	0.282885	10	0.0580686
GO:0031401	positive regulation of protein modification	0.00635124	0.634693	4	0.282885	10	0.0580686
GO:0031116	positive regulation of microtubule polymerization	0.00635124	0.634693	4	0.282885	10	0.0580686
GO:0043170	macromolecule metabolic process	0.00645223	0.635591	429	30.3395	4728	27.4549
GO:0007015	actin filament organization	0.00666651	0.635591	10	0.707214	50	0.290343
GO:0005667	transcription factor complex	0.0067182	0.635591	36	2.54597	286	1.66076
GO:0001946	lymphangiogenesis	0.00673752	0.635591	2	0.141443	2	0.0116137
GO:0004822	isoleucine-tRNA ligase activity	0.00673752	0.635591	2	0.141443	2	0.0116137
GO:0030264	nuclear fragmentation during apoptosis	0.00673752	0.635591	2	0.141443	2	0.0116137
GO:0021776	smoothened signaling pathway involved in spinal cord motor neuron cell fate specification	0.00673752	0.635591	2	0.141443	2	0.0116137
GO:0021775	smoothened signaling pathway involved in ventral spinal cord interneuron specification	0.00673752	0.635591	2	0.141443	2	0.0116137
GO:0032796	uropod organization and biogenesis	0.00673752	0.635591	2	0.141443	2	0.0116137
GO:0030540	female genitalia development	0.00673752	0.635591	2	0.141443	2	0.0116137
GO:0015410	manganese-transporting ATPase activity	0.00673752	0.635591	2	0.141443	2	0.0116137
GO:0050918	positive chemotaxis	0.00673752	0.635591	2	0.141443	2	0.0116137
GO:0005697	telomerase holoenzyme complex	0.00673752	0.635591	2	0.141443	2	0.0116137
GO:0019166	trans-2-enoyl-CoA reductase (NADPH) activity	0.00673752	0.635591	2	0.141443	2	0.0116137
GO:0030050	vesicle transport along actin filament	0.00673752	0.635591	2	0.141443	2	0.0116137
GO:0030026	manganese ion homeostasis	0.00673752	0.635591	2	0.141443	2	0.0116137
GO:0008356	asymmetric cell division	0.00673752	0.635591	2	0.141443	2	0.0116137
GO:0006428	isoleucyl-tRNA aminoacylation	0.00673752	0.635591	2	0.141443	2	0.0116137
GO:0032468	Golgi calcium ion homeostasis	0.00673752	0.635591	2	0.141443	2	0.0116137
GO:0032472	Golgi calcium ion transport	0.00673752	0.635591	2	0.141443	2	0.0116137
GO:0032495	response to muramyl dipeptide	0.00673752	0.635591	2	0.141443	2	0.0116137
GO:0005925	focal adhesion	0.00688813	0.648071	11	0.777935	58	0.336798
GO:0008544	epidermis development	0.00691187	0.648579	12	0.848656	66	0.383253
GO:0055010	ventricular cardiac muscle morphogenesis	0.00718222	0.670391	6	0.424328	22	0.127751
GO:0048286	alveolus development	0.00718222	0.670391	6	0.424328	22	0.127751
GO:0006306	DNA methylation	0.00751081	0.697382	5	0.353607	16	0.0929098
GO:0006305	DNA alkylation	0.00751081	0.697382	5	0.353607	16	0.0929098
GO:0007160	cell-matrix adhesion	0.00769692	0.712791	10	0.707214	51	0.29615
GO:0016459	myosin complex	0.00785422	0.725459	11	0.777935	59	0.342605
GO:0005125	cytokine activity	0.00802224	0.739049	32	2.26308	250	1.45172
GO:0005543	phospholipid binding	0.00832055	0.76454	19	1.34371	128	0.743279
GO:0043406	positive regulation of MAPK activity	0.00879048	0.805627	12	0.848656	68	0.394867
GO:0044264	cellular polysaccharide metabolic process	0.00884583	0.806521	10	0.707214	52	0.301957
GO:0005976	polysaccharide metabolic process	0.00884583	0.806521	10	0.707214	52	0.301957
GO:0017124	SH3 domain binding	0.00904617	0.818831	14	0.990099	85	0.493583
GO:0048538	thymus development	0.00905439	0.818831	6	0.424328	23	0.133558
GO:0042979	ornithine decarboxylase regulator activity	0.00914288	0.818831	3	0.212164	6	0.0348412
GO:0051879	Hsp90 protein binding	0.00914288	0.818831	3	0.212164	6	0.0348412
GO:0032331	negative regulation of chondrocyte differentiation	0.00914288	0.818831	3	0.212164	6	0.0348412
GO:0005606	laminin-1 complex	0.00914288	0.818831	3	0.212164	6	0.0348412
GO:0045792	negative regulation of cell size	0.00914288	0.818831	3	0.212164	6	0.0348412
GO:0016328	lateral plasma membrane	0.00933833	0.827952	4	0.282885	11	0.0638755
GO:0048594	eye morphogenesis (sensu Actinopterygii)	0.00933833	0.827952	4	0.282885	11	0.0638755
GO:0030728	ovulation	0.00933833	0.827952	4	0.282885	11	0.0638755
GO:0031112	positive regulation of microtubule polymerization or depolymerization	0.00933833	0.827952	4	0.282885	11	0.0638755
GO:0017015	regulation of transforming growth factor beta receptor signaling pathway	0.0094029	0.831593	7	0.495049	30	0.174206
GO:0001666	response to hypoxia	0.00949955	0.836275	13	0.919378	77	0.447128
GO:0009888	tissue development	0.00950312	0.836275	32	2.26308	253	1.46914
GO:0008033	tRNA processing	0.00986783	0.865421	12	0.848656	69	0.400674
GO:0031396	regulation of protein ubiquitination	0.00993219	0.865421	5	0.353607	17	0.0987167
GO:0006304	DNA modification	0.00993219	0.865421	5	0.353607	17	0.0987167
GO:0045661	regulation of myoblast differentiation	0.00993219	0.865421	5	0.353607	17	0.0987167
GO:0004702	receptor signaling protein serine/threonine kinase activity	0.0101216	0.879757	10	0.707214	53	0.307764
GO:0001974	blood vessel remodeling	0.0112507	0.973382	6	0.424328	24	0.139365
GO:0004713	protein-tyrosine kinase activity	0.0112538	0.973382	23	1.62659	169	0.98136
GO:0005924	cell-substrate adherens junction	0.011392	0.982936	11	0.777935	62	0.360026
GO:0045321	leukocyte activation	0.0114913	0.989094	29	2.05092	227	1.31816
GO:0048589	developmental growth	0.0115326	0.990238	10	0.707214	54	0.313571
GO:0007165	signal transduction	0.0119522	1	217	15.3465	2295	13.3268
GO:0001501	skeletal development	0.0124629	1	15	1.06082	97	0.563266
GO:0016055	Wnt receptor signaling pathway	0.0125205	1	18	1.27298	124	0.720051
GO:0051098	regulation of binding	0.012536	1	8	0.565771	39	0.226468
GO:0006342	chromatin silencing	0.0128393	1	5	0.353607	18	0.104524
GO:0019903	protein phosphatase binding	0.0128393	1	5	0.353607	18	0.104524
GO:0031399	regulation of protein modification	0.0128393	1	5	0.353607	18	0.104524
GO:0042169	SH2 domain binding	0.0128393	1	5	0.353607	18	0.104524
GO:0045670	regulation of osteoclast differentiation	0.0128393	1	5	0.353607	18	0.104524
GO:0007215	glutamate signaling pathway	0.0131091	1	4	0.282885	12	0.0696824
GO:0030010	establishment of cell polarity	0.0131091	1	4	0.282885	12	0.0696824
GO:0045309	protein phosphorylated amino acid binding	0.0131091	1	4	0.282885	12	0.0696824
GO:0001772	immunological synapse	0.0131091	1	4	0.282885	12	0.0696824
GO:0002244	hemopoietic progenitor cell differentiation	0.0131091	1	4	0.282885	12	0.0696824
GO:0030705	cytoskeleton-dependent intracellular transport	0.0133301	1	19	1.34371	134	0.77812
GO:0004553	hydrolase activity, hydrolyzing O-glycosyl compounds	0.0134005	1	14	0.990099	89	0.516811
GO:0030176	integral to endoplasmic reticulum membrane	0.0134687	1	7	0.495049	32	0.18582
GO:0006984	ER-nuclear signaling pathway	0.0137979	1	6	0.424328	25	0.145172
GO:0002478	antigen processing and presentation of exogenous peptide antigen	0.0137979	1	6	0.424328	25	0.145172
GO:0005096	GTPase activator activity	0.0146983	1	26	1.83876	202	1.17299
GO:0051336	regulation of hydrolase activity	0.0146983	1	26	1.83876	202	1.17299
GO:0016070	RNA metabolic process	0.0147139	1	69	4.87977	647	3.75704
GO:0005912	adherens junction	0.0148866	1	15	1.06082	99	0.574879
GO:0042110	T cell activation	0.0149117	1	16	1.13154	108	0.627141
GO:0008593	regulation of Notch signaling pathway	0.0150296	1	3	0.212164	7	0.040648
GO:0014068	positive regulation of phosphoinositide 3-kinase cascade	0.0150296	1	3	0.212164	7	0.040648
GO:0032469	endoplasmic reticulum calcium ion homeostasis	0.0150296	1	3	0.212164	7	0.040648
GO:0043256	laminin complex	0.0150296	1	3	0.212164	7	0.040648
GO:0043583	ear development	0.0150296	1	3	0.212164	7	0.040648
GO:0045084	positive regulation of interleukin-12 biosynthetic process	0.0150296	1	3	0.212164	7	0.040648
GO:0003774	motor activity	0.0150669	1	20	1.41443	145	0.841995
GO:0048592	eye morphogenesis	0.0159147	1	7	0.495049	33	0.191627
GO:0043065	positive regulation of apoptosis	0.0161118	1	33	2.3338	273	1.58527
GO:0031047	RNA-mediated gene silencing	0.0162708	1	5	0.353607	19	0.11033
GO:0031507	heterochromatin formation	0.0162708	1	5	0.353607	19	0.11033
GO:0035116	embryonic hindlimb morphogenesis	0.0162708	1	5	0.353607	19	0.11033
GO:0045763	negative regulation of amino acid metabolic process	0.0162708	1	5	0.353607	19	0.11033
GO:0001933	negative regulation of protein amino acid phosphorylation	0.0162708	1	5	0.353607	19	0.11033
GO:0007162	negative regulation of cell adhesion	0.0167212	1	6	0.424328	26	0.150978
GO:0042733	embryonic digit morphogenesis	0.0167212	1	6	0.424328	26	0.150978
GO:0055008	cardiac muscle morphogensis	0.0167212	1	6	0.424328	26	0.150978
GO:0006366	transcription from RNA polymerase II promoter	0.0168387	1	8	0.565771	41	0.238081
GO:0030863	cortical cytoskeleton	0.0168387	1	8	0.565771	41	0.238081
GO:0048167	regulation of synaptic plasticity	0.0168387	1	8	0.565771	41	0.238081
GO:0003690	double-stranded DNA binding	0.0168387	1	8	0.565771	41	0.238081
GO:0007178	transmembrane receptor protein serine/threonine kinase signaling pathway	0.0168627	1	12	0.848656	74	0.429708
GO:0005516	calmodulin binding	0.017317	1	17	1.20226	119	0.691017
GO:0031113	regulation of microtubule polymerization	0.0177248	1	4	0.282885	13	0.0754892
GO:0043198	dendritic shaft	0.0177248	1	4	0.282885	13	0.0754892
GO:0002762	negative regulation of myeloid leukocyte differentiation	0.0177248	1	4	0.282885	13	0.0754892
GO:0043068	positive regulation of programmed cell death	0.0186457	1	33	2.3338	276	1.60269
GO:0048771	tissue remodeling	0.0186595	1	7	0.495049	34	0.197433
GO:0004560	alpha-L-fucosidase activity	0.0191076	1	2	0.141443	3	0.0174206
GO:0006089	lactate metabolic process	0.0191076	1	2	0.141443	3	0.0174206
GO:0006808	regulation of nitrogen utilization	0.0191076	1	2	0.141443	3	0.0174206
GO:0007098	centrosome cycle	0.0191076	1	2	0.141443	3	0.0174206
GO:0007442	hindgut morphogenesis	0.0191076	1	2	0.141443	3	0.0174206
GO:0009405	pathogenesis	0.0191076	1	2	0.141443	3	0.0174206
GO:0009452	RNA capping	0.0191076	1	2	0.141443	3	0.0174206
GO:0015928	fucosidase activity	0.0191076	1	2	0.141443	3	0.0174206
GO:0016565	general transcriptional repressor activity	0.0191076	1	2	0.141443	3	0.0174206
GO:0019230	proprioception	0.0191076	1	2	0.141443	3	0.0174206
GO:0019871	sodium channel inhibitor activity	0.0191076	1	2	0.141443	3	0.0174206
GO:0021860	pyramidal neuron development	0.0191076	1	2	0.141443	3	0.0174206
GO:0030836	positive regulation of actin filament depolymerization	0.0191076	1	2	0.141443	3	0.0174206
GO:0030877	beta-catenin destruction complex	0.0191076	1	2	0.141443	3	0.0174206
GO:0032236	positive regulation of calcium ion transport via store-operated calcium channel	0.0191076	1	2	0.141443	3	0.0174206
GO:0032494	response to peptidoglycan	0.0191076	1	2	0.141443	3	0.0174206
GO:0043259	laminin-10 complex	0.0191076	1	2	0.141443	3	0.0174206
GO:0043559	insulin binding	0.0191076	1	2	0.141443	3	0.0174206
GO:0043618	regulation of transcription from RNA polymerase II promoter in response to stress	0.0191076	1	2	0.141443	3	0.0174206
GO:0043619	regulation of transcription from RNA polymerase II promoter in response to oxidative stress	0.0191076	1	2	0.141443	3	0.0174206
GO:0043620	regulation of transcription in response to stress	0.0191076	1	2	0.141443	3	0.0174206
GO:0045335	phagocytic vesicle	0.0191076	1	2	0.141443	3	0.0174206
GO:0048552	regulation of metalloenzyme activity	0.0191076	1	2	0.141443	3	0.0174206
GO:0048554	positive regulation of metalloenzyme activity	0.0191076	1	2	0.141443	3	0.0174206
GO:0051541	elastin metabolic process	0.0191076	1	2	0.141443	3	0.0174206
GO:0000940	outer kinetochore of condensed chromosome	0.0191076	1	2	0.141443	3	0.0174206
GO:0003726	double-stranded RNA adenosine deaminase activity	0.0191076	1	2	0.141443	3	0.0174206
GO:0003886	DNA (cytosine-5-)-methyltransferase activity	0.0191076	1	2	0.141443	3	0.0174206
GO:0030055	cell-matrix junction	0.0198314	1	11	0.777935	67	0.38906
GO:0030900	forebrain development	0.0198314	1	11	0.777935	67	0.38906
GO:0031589	cell-substrate adhesion	0.0198314	1	11	0.777935	67	0.38906
GO:0001890	placenta development	0.0198314	1	11	0.777935	67	0.38906
GO:0005901	caveola	0.0200442	1	6	0.424328	27	0.156785
GO:0007224	smoothened signaling pathway	0.0200442	1	6	0.424328	27	0.156785
GO:0009100	glycoprotein metabolic process	0.0200442	1	6	0.424328	27	0.156785
GO:0019210	kinase inhibitor activity	0.0200442	1	6	0.424328	27	0.156785
GO:0006470	protein amino acid dephosphorylation	0.0201331	1	17	1.20226	121	0.702631
GO:0031594	neuromuscular junction	0.0202614	1	5	0.353607	20	0.116137
GO:0051101	regulation of DNA binding	0.0202614	1	5	0.353607	20	0.116137
GO:0001836	release of cytochrome c from mitochondria	0.0202614	1	5	0.353607	20	0.116137
GO:0004674	protein serine/threonine kinase activity	0.0202858	1	46	3.25318	412	2.39243
GO:0007154	cell communication	0.0206244	1	235	16.6195	2535	14.7204
GO:0016570	histone modification	0.0209109	1	10	0.707214	59	0.342605
GO:0031668	cellular response to extracellular stimulus	0.0217197	1	7	0.495049	35	0.20324
GO:0051259	protein oligomerization	0.0225525	1	12	0.848656	77	0.447128
GO:0042415	norepinephrine metabolic process	0.0225954	1	3	0.212164	8	0.0464549
GO:0048070	regulation of developmental pigmentation	0.0225954	1	3	0.212164	8	0.0464549
GO:0050435	beta-amyloid metabolic process	0.0225954	1	3	0.212164	8	0.0464549
GO:0051928	positive regulation of calcium ion transport	0.0225954	1	3	0.212164	8	0.0464549
GO:0048732	gland development	0.0227644	1	14	0.990099	95	0.551652
GO:0030182	neuron differentiation	0.0227917	1	13	0.919378	86	0.49939
GO:0051969	regulation of transmission of nerve impulse	0.0227917	1	13	0.919378	86	0.49939
GO:0006509	membrane protein ectodomain proteolysis	0.0232336	1	4	0.282885	14	0.0812961
GO:0042287	MHC protein binding	0.0232336	1	4	0.282885	14	0.0812961
GO:0050771	negative regulation of axonogenesis	0.0232336	1	4	0.282885	14	0.0812961
GO:0001829	trophectodermal cell differentiation	0.0232336	1	4	0.282885	14	0.0812961
GO:0004714	transmembrane receptor protein tyrosine kinase activity	0.0233086	1	10	0.707214	60	0.348412
GO:0007050	cell cycle arrest	0.0242558	1	11	0.777935	69	0.400674
GO:0016571	histone methylation	0.0248411	1	5	0.353607	21	0.121944
GO:0030048	actin filament-based movement	0.0248411	1	5	0.353607	21	0.121944
GO:0035136	forelimb morphogenesis	0.0248411	1	5	0.353607	21	0.121944
GO:0045103	intermediate filament-based process	0.0248411	1	5	0.353607	21	0.121944
GO:0045814	negative regulation of gene expression, epigenetic	0.0248411	1	5	0.353607	21	0.121944
GO:0050680	negative regulation of epithelial cell proliferation	0.0248411	1	5	0.353607	21	0.121944
GO:0051656	establishment of organelle localization	0.0248411	1	5	0.353607	21	0.121944
GO:0000271	polysaccharide biosynthetic process	0.0248411	1	5	0.353607	21	0.121944
GO:0007281	germ cell development	0.0251106	1	7	0.495049	36	0.209047
GO:0022602	menstrual cycle process	0.0251447	1	8	0.565771	44	0.255502
GO:0048878	chemical homeostasis	0.0263141	1	31	2.19236	263	1.52721
GO:0007409	axonogenesis	0.0270612	1	12	0.848656	79	0.458742
GO:0040007	growth	0.027235	1	20	1.41443	154	0.894257
GO:0045444	fat cell differentiation	0.0273634	1	9	0.636492	53	0.307764
GO:0003007	heart morphogenesis	0.0273634	1	9	0.636492	53	0.307764
GO:0031110	regulation of microtubule polymerization or depolymerization	0.0279733	1	6	0.424328	29	0.168399
GO:0004725	protein tyrosine phosphatase activity	0.0283622	1	15	1.06082	107	0.621334
GO:0001570	vasculogenesis	0.0284552	1	8	0.565771	45	0.261309
GO:0000793	condensed chromosome	0.0288465	1	7	0.495049	37	0.214854
GO:0006875	metal ion homeostasis	0.0289477	1	20	1.41443	155	0.900064
GO:0065008	regulation of biological quality	0.0296029	1	57	4.03112	540	3.13571
GO:0044427	chromosomal part	0.0296034	1	38	2.68741	338	1.96272
GO:0004434	inositol or phosphatidylinositol phosphodiesterase activity	0.0296703	1	4	0.282885	15	0.087103
GO:0004435	phosphoinositide phospholipase C activity	0.0296703	1	4	0.282885	15	0.087103
GO:0004709	MAP kinase kinase kinase activity	0.0296703	1	4	0.282885	15	0.087103
GO:0021904	dorsoventral neural tube patterning	0.0296703	1	4	0.282885	15	0.087103
GO:0031069	hair follicle morphogenesis	0.0296703	1	4	0.282885	15	0.087103
GO:0046824	positive regulation of nucleocytoplasmic transport	0.0296703	1	4	0.282885	15	0.087103
GO:0048066	pigmentation during development	0.0296703	1	4	0.282885	15	0.087103
GO:0048806	genitalia development	0.0296703	1	4	0.282885	15	0.087103
GO:0006595	polyamine metabolic process	0.0300348	1	5	0.353607	22	0.127751
GO:0019902	phosphatase binding	0.0300348	1	5	0.353607	22	0.127751
GO:0030005	di-, tri-valent inorganic cation homeostasis	0.0302301	1	19	1.34371	146	0.847802
GO:0050678	regulation of epithelial cell proliferation	0.0305295	1	9	0.636492	54	0.313571
GO:0051129	negative regulation of cell organization and biogenesis	0.0305295	1	9	0.636492	54	0.313571
GO:0030054	cell junction	0.03136	1	52	3.67751	488	2.83375
GO:0005112	Notch binding	0.0318563	1	3	0.212164	9	0.0522618
GO:0006349	imprinting	0.0318563	1	3	0.212164	9	0.0522618
GO:0015924	mannosyl-oligosaccharide mannosidase activity	0.0318563	1	3	0.212164	9	0.0522618
GO:0016446	somatic hypermutation of immunoglobulin genes	0.0318563	1	3	0.212164	9	0.0522618
GO:0030742	GTP-dependent protein binding	0.0318563	1	3	0.212164	9	0.0522618
GO:0031056	regulation of histone modification	0.0318563	1	3	0.212164	9	0.0522618
GO:0042605	peptide antigen binding	0.0318563	1	3	0.212164	9	0.0522618
GO:0045075	regulation of interleukin-12 biosynthetic process	0.0318563	1	3	0.212164	9	0.0522618
GO:0001542	ovulation (sensu Mammalia)	0.0318563	1	3	0.212164	9	0.0522618
GO:0002262	myeloid cell homeostasis	0.0318563	1	3	0.212164	9	0.0522618
GO:0002566	somatic diversification of immune receptors via somatic mutation	0.0318563	1	3	0.212164	9	0.0522618
GO:0001726	ruffle	0.0320546	1	8	0.565771	46	0.267116
GO:0008757	S-adenosylmethionine-dependent methyltransferase activity	0.0321773	1	11	0.777935	72	0.418094
GO:0043523	regulation of neuron apoptosis	0.0321917	1	12	0.848656	81	0.470356
GO:0016566	specific transcriptional repressor activity	0.0326159	1	6	0.424328	30	0.174206
GO:0019884	antigen processing and presentation of exogenous antigen	0.0326159	1	6	0.424328	30	0.174206
GO:0005773	vacuole	0.0328137	1	27	1.90948	227	1.31816
GO:0005829	cytosol	0.0328908	1	50	3.53607	468	2.71761
GO:0043025	cell soma	0.0337354	1	14	0.990099	100	0.580686
GO:0000187	activation of MAPK activity	0.0339421	1	9	0.636492	55	0.319377
GO:0030030	cell projection organization and biogenesis	0.035725	1	18	1.27298	139	0.807154
GO:0007028	cytoplasm organization and biogenesis	0.0358627	1	5	0.353607	23	0.133558
GO:0043407	negative regulation of MAPK activity	0.0358627	1	5	0.353607	23	0.133558
GO:0001755	neural crest cell migration	0.0358627	1	5	0.353607	23	0.133558
GO:0030217	T cell differentiation	0.0359525	1	8	0.565771	47	0.272923
GO:0040029	regulation of gene expression, epigenetic	0.0359525	1	8	0.565771	47	0.272923
GO:0045045	secretory pathway	0.0359525	1	8	0.565771	47	0.272923
GO:0045055	regulated secretory pathway	0.0359525	1	8	0.565771	47	0.272923
GO:0004597	peptide-aspartate beta-dioxygenase activity	0.036141	1	2	0.141443	4	0.0232275
GO:0005173	stem cell factor receptor binding	0.036141	1	2	0.141443	4	0.0232275
GO:0007216	metabotropic glutamate receptor signaling pathway	0.036141	1	2	0.141443	4	0.0232275
GO:0009008	DNA-methyltransferase activity	0.036141	1	2	0.141443	4	0.0232275
GO:0015884	folic acid transport	0.036141	1	2	0.141443	4	0.0232275
GO:0016774	phosphotransferase activity, carboxyl group as acceptor	0.036141	1	2	0.141443	4	0.0232275
GO:0016833	oxo-acid-lyase activity	0.036141	1	2	0.141443	4	0.0232275
GO:0019987	negative regulation of anti-apoptosis	0.036141	1	2	0.141443	4	0.0232275
GO:0021535	cell migration in hindbrain	0.036141	1	2	0.141443	4	0.0232275
GO:0021569	rhombomere 3 development	0.036141	1	2	0.141443	4	0.0232275
GO:0021604	cranial nerve structural organization	0.036141	1	2	0.141443	4	0.0232275
GO:0021612	facial nerve structural organization	0.036141	1	2	0.141443	4	0.0232275
GO:0021696	cerebellar cortex morphogenesis	0.036141	1	2	0.141443	4	0.0232275
GO:0021938	smoothened signaling pathway in regulation of granule cell precursor cell proliferation	0.036141	1	2	0.141443	4	0.0232275
GO:0030506	ankyrin binding	0.036141	1	2	0.141443	4	0.0232275
GO:0030519	snoRNP binding	0.036141	1	2	0.141443	4	0.0232275
GO:0031060	regulation of histone methylation	0.036141	1	2	0.141443	4	0.0232275
GO:0032364	oxygen homeostasis	0.036141	1	2	0.141443	4	0.0232275
GO:0032401	establishment of melanosome localization	0.036141	1	2	0.141443	4	0.0232275
GO:0032909	regulation of transforming growth factor-beta2 production	0.036141	1	2	0.141443	4	0.0232275
GO:0035065	regulation of histone acetylation	0.036141	1	2	0.141443	4	0.0232275
GO:0035067	negative regulation of histone acetylation	0.036141	1	2	0.141443	4	0.0232275
GO:0035313	wound healing, spreading of epidermal cells	0.036141	1	2	0.141443	4	0.0232275
GO:0043547	positive regulation of GTPase activity	0.036141	1	2	0.141443	4	0.0232275
GO:0045110	intermediate filament bundle assembly	0.036141	1	2	0.141443	4	0.0232275
GO:0045198	establishment of epithelial cell polarity	0.036141	1	2	0.141443	4	0.0232275
GO:0046920	alpha(1,3)-fucosyltransferase activity	0.036141	1	2	0.141443	4	0.0232275
GO:0048739	cardiac muscle fiber development	0.036141	1	2	0.141443	4	0.0232275
GO:0051010	microtubule plus-end binding	0.036141	1	2	0.141443	4	0.0232275
GO:0000288	mRNA catabolic process, deadenylation-dependent decay	0.036141	1	2	0.141443	4	0.0232275
GO:0002318	myeloid progenitor cell differentiation	0.036141	1	2	0.141443	4	0.0232275
GO:0003969	RNA editase activity	0.036141	1	2	0.141443	4	0.0232275
GO:0005518	collagen binding	0.0370567	1	4	0.282885	16	0.0929098
GO:0019886	antigen processing and presentation of exogenous peptide antigen via MHC class II	0.0370567	1	4	0.282885	16	0.0929098
GO:0030516	regulation of axon extension	0.0370567	1	4	0.282885	16	0.0929098
GO:0032330	regulation of chondrocyte differentiation	0.0370567	1	4	0.282885	16	0.0929098
GO:0001578	microtubule bundle formation	0.0370567	1	4	0.282885	16	0.0929098
GO:0002495	antigen processing and presentation of peptide antigen via MHC class II	0.0370567	1	4	0.282885	16	0.0929098
GO:0031644	regulation of neurological process	0.0372633	1	13	0.919378	92	0.534231
GO:0048511	rhythmic process	0.0376087	1	9	0.636492	56	0.325184
GO:0001704	formation of primary germ layer	0.0377307	1	6	0.424328	31	0.180013
GO:0002761	regulation of myeloid leukocyte differentiation	0.0377307	1	6	0.424328	31	0.180013
GO:0001822	kidney development	0.0379832	1	12	0.848656	83	0.48197
GO:0003729	mRNA binding	0.0383239	1	10	0.707214	65	0.377446
GO:0019199	transmembrane receptor protein kinase activity	0.038383	1	11	0.777935	74	0.429708
GO:0022607	cellular component assembly	0.0395799	1	45	3.18246	420	2.43888
GO:0051427	hormone receptor binding	0.0401576	1	8	0.565771	48	0.278729
GO:0048812	neurite morphogenesis	0.0401953	1	13	0.919378	93	0.540038
GO:0048858	cell projection morphogenesis	0.0401953	1	13	0.919378	93	0.540038
GO:0022403	cell cycle phase	0.0402085	1	32	2.26308	283	1.64334
GO:0006816	calcium ion transport	0.0404348	1	15	1.06082	112	0.650369
GO:0016125	sterol metabolic process	0.0411382	1	12	0.848656	84	0.487777
GO:0050804	regulation of synaptic transmission	0.0411382	1	12	0.848656	84	0.487777
GO:0006260	DNA replication	0.0414856	1	16	1.13154	122	0.708437
GO:0006338	chromatin remodeling	0.0415362	1	9	0.636492	57	0.330991
GO:0000792	heterochromatin	0.0415362	1	9	0.636492	57	0.330991
GO:0005604	basement membrane	0.0419787	1	10	0.707214	66	0.383253
GO:0016702	oxidoreductase activity, acting on single donors with incorporation of molecular oxygen, incorporation of two atoms of oxygen	0.0419787	1	10	0.707214	66	0.383253
GO:0051213	dioxygenase activity	0.0419787	1	10	0.707214	66	0.383253
GO:0004715	non-membrane spanning protein tyrosine kinase activity	0.042247	1	7	0.495049	40	0.232275
GO:0009451	RNA modification	0.042247	1	7	0.495049	40	0.232275
GO:0022601	menstrual cycle phase	0.042247	1	7	0.495049	40	0.232275
GO:0031175	neurite development	0.042247	1	7	0.495049	40	0.232275
GO:0002274	myeloid leukocyte activation	0.042247	1	7	0.495049	40	0.232275
GO:0004860	protein kinase inhibitor activity	0.0423396	1	5	0.353607	24	0.139365
GO:0009954	proximal/distal pattern formation	0.0423396	1	5	0.353607	24	0.139365
GO:0042632	cholesterol homeostasis	0.0423396	1	5	0.353607	24	0.139365
GO:0000910	cytokinesis	0.0423396	1	5	0.353607	24	0.139365
GO:0001569	patterning of blood vessels	0.0423396	1	5	0.353607	24	0.139365
GO:0001657	ureteric bud development	0.0423396	1	5	0.353607	24	0.139365
GO:0005159	insulin-like growth factor receptor binding	0.042787	1	3	0.212164	10	0.0580686
GO:0005388	calcium-transporting ATPase activity	0.042787	1	3	0.212164	10	0.0580686
GO:0015085	calcium ion transporter activity	0.042787	1	3	0.212164	10	0.0580686
GO:0016307	phosphatidylinositol phosphate kinase activity	0.042787	1	3	0.212164	10	0.0580686
GO:0017145	stem cell division	0.042787	1	3	0.212164	10	0.0580686
GO:0030316	osteoclast differentiation	0.042787	1	3	0.212164	10	0.0580686
GO:0045648	positive regulation of erythrocyte differentiation	0.042787	1	3	0.212164	10	0.0580686
GO:0048566	embryonic gut development	0.042787	1	3	0.212164	10	0.0580686
GO:0051049	regulation of transport	0.0430025	1	23	1.62659	192	1.11492
GO:0003702	RNA polymerase II transcription factor activity	0.0432324	1	15	1.06082	113	0.656176
GO:0001708	cell fate specification	0.0433296	1	6	0.424328	32	0.18582
GO:0005083	small GTPase regulator activity	0.0443985	1	25	1.76803	213	1.23686
GO:0016573	histone acetylation	0.0454028	1	4	0.282885	17	0.0987167
GO:0030865	cortical cytoskeleton organization and biogenesis	0.0454028	1	4	0.282885	17	0.0987167
GO:0035115	embryonic forelimb morphogenesis	0.0454028	1	4	0.282885	17	0.0987167
GO:0043197	dendritic spine	0.0454028	1	4	0.282885	17	0.0987167
GO:0051017	actin filament bundle formation	0.0454028	1	4	0.282885	17	0.0987167
GO:0002504	antigen processing and presentation of peptide or polysaccharide antigen via MHC class II	0.0454028	1	4	0.282885	17	0.0987167
GO:0016701	oxidoreductase activity, acting on single donors with incorporation of molecular oxygen	0.0458642	1	10	0.707214	67	0.38906
GO:0001775	cell activation	0.0459517	1	29	2.05092	255	1.48075
GO:0007389	pattern specification process	0.0462589	1	31	2.19236	276	1.60269
GO:0007420	brain development	0.0465397	1	13	0.919378	95	0.551652
GO:0043087	regulation of GTPase activity	0.0465397	1	13	0.919378	95	0.551652
GO:0003723	RNA binding	0.046917	1	73	5.16266	732	4.25062
GO:0006399	tRNA metabolic process	0.0470529	1	16	1.13154	124	0.720051
GO:0005575	cellular_component	0.0472046	1	1253	88.6139	15011	87.1668
GO:0002237	response to molecule of bacterial origin	0.0474781	1	7	0.495049	41	0.238081
GO:0006576	biogenic amine metabolic process	0.0479873	1	12	0.848656	86	0.49939
GO:0007005	mitochondrion organization and biogenesis	0.0491812	1	11	0.777935	77	0.447128
GO:0008203	cholesterol metabolic process	0.0491812	1	11	0.777935	77	0.447128
GO:0032200	telomere organization and biogenesis	0.049475	1	5	0.353607	25	0.145172
GO:0000922	spindle pole	0.049475	1	5	0.353607	25	0.145172
GO:0008217	blood pressure regulation	0.049519	1	8	0.565771	50	0.290343
GO:0000165	MAPKKK cascade	0.049519	1	8	0.565771	50	0.290343
GO:0016324	apical plasma membrane	0.0500257	1	16	1.13154	125	0.725858

## Sheet: Set2-GO
GO ACCESSION	GO Term	p-value	corrected p-value	Count in Selection	% Count in Selection	Count in Total	% Count in Total
GO:0004617	phosphoglycerate dehydrogenase activity	8.92572e-28	6.79413e-24	13	8.72483	13	0.0754892
GO:0021510	spinal cord development	9.23496e-26	1.75738e-22	13	8.72483	15	0.087103
GO:0006566	threonine metabolic process	9.23496e-26	1.75738e-22	13	8.72483	15	0.087103
GO:0006564	L-serine biosynthetic process	9.23496e-26	1.75738e-22	13	8.72483	15	0.087103
GO:0019605	butyrate metabolic process	4.88916e-25	6.2026e-22	13	8.72483	16	0.0929098
GO:0009448	gamma-aminobutyric acid metabolic process	4.88916e-25	6.2026e-22	13	8.72483	16	0.0929098
GO:0019530	taurine metabolic process	7.37102e-24	8.01531e-21	13	8.72483	18	0.104524
GO:0009070	serine family amino acid biosynthetic process	2.31703e-23	1.95965e-20	13	8.72483	19	0.11033
GO:0006563	L-serine metabolic process	2.31703e-23	1.95965e-20	13	8.72483	19	0.11033
GO:0006544	glycine metabolic process	9.48643e-22	7.22093e-19	13	8.72483	23	0.133558
GO:0009066	aspartate family amino acid metabolic process	1.65092e-21	1.14241e-18	14	9.39597	31	0.180013
GO:0021915	neural tube development	8.43551e-21	5.35083e-18	13	8.72483	26	0.150978
GO:0021782	glial cell development	2.99237e-20	1.75211e-17	13	8.72483	28	0.162592
GO:0006541	glutamine metabolic process	9.43117e-20	5.12777e-17	13	8.72483	30	0.174206
GO:0022008	neurogenesis	7.0957e-19	3.37572e-16	13	8.72483	34	0.197433
GO:0009069	serine family amino acid metabolic process	7.0957e-19	3.37572e-16	13	8.72483	34	0.197433
GO:0031175	neurite development	8.8031e-18	3.94165e-15	13	8.72483	40	0.232275
GO:0009064	glutamine family amino acid metabolic process	1.70604e-17	7.21452e-15	14	9.39597	54	0.313571
GO:0008652	amino acid biosynthetic process	2.41161e-16	9.66147e-14	13	8.72483	50	0.290343
GO:0009309	amine biosynthetic process	1.58999e-14	6.0514e-12	14	9.39597	85	0.493583
GO:0044271	nitrogen compound biosynthetic process	3.64572e-14	1.32146e-11	14	9.39597	90	0.522618
GO:0006575	amino acid derivative metabolic process	1.75693e-13	6.07887e-11	15	10.0671	123	0.714244
GO:0016616	oxidoreductase activity, acting on the CH-OH group of donors, NAD or NADP as acceptor	1.71241e-12	5.66724e-10	14	9.39597	118	0.68521
GO:0016614	oxidoreductase activity, acting on CH-OH group of donors	6.56823e-12	2.08319e-09	14	9.39597	130	0.754892
GO:0051287	NAD binding	1.83715e-11	5.59364e-09	13	8.72483	114	0.661983
GO:0030030	cell projection organization and biogenesis	2.29489e-10	6.7186e-08	13	8.72483	139	0.807154
GO:0006520	amino acid metabolic process	4.1257e-10	1.16312e-07	15	10.0671	210	1.21944
GO:0006519	amino acid and derivative metabolic process	8.27264e-10	2.24893e-07	17	11.4094	297	1.72464
GO:0000902	cell morphogenesis	2.77029e-09	7.27141e-07	15	10.0671	241	1.39945
GO:0048037	cofactor binding	4.76899e-09	1.21003e-06	16	10.7383	291	1.6898
GO:0050662	coenzyme binding	1.08017e-08	2.65229e-06	14	9.39597	227	1.31816
GO:0022402	cell cycle process	1.57439e-08	3.74502e-06	23	15.4362	670	3.8906
GO:0009308	amine metabolic process	1.04998e-07	2.42191e-05	16	10.7383	363	2.10789
GO:0032787	monocarboxylic acid metabolic process	1.77472e-07	3.9732e-05	14	9.39597	284	1.64915
GO:0006807	nitrogen compound metabolic process	2.59119e-07	5.63536e-05	16	10.7383	388	2.25306
GO:0019752	carboxylic acid metabolic process	1.57876e-06	0.000324793	17	11.4094	500	2.90343
GO:0006082	organic acid metabolic process	1.57876e-06	0.000324793	17	11.4094	500	2.90343
GO:0009303	rRNA transcription	2.52449e-06	0.000505685	4	2.68456	12	0.0696824
GO:0009058	biosynthetic process	3.45499e-05	0.00674331	28	18.7919	1431	8.30962
GO:0005915	zonula adherens	7.43629e-05	0.0139665	2	1.34228	2	0.0116137
GO:0048468	cell development	7.52281e-05	0.0139665	17	11.4094	674	3.91383
GO:0016491	oxidoreductase activity	8.08278e-05	0.0146488	19	12.7517	816	4.7384
GO:0002474	antigen processing and presentation of peptide antigen via MHC class I	0.000141201	0.0249955	4	2.68456	31	0.180013
GO:0005813	centrosome	0.000166945	0.028881	8	5.36913	179	1.03943
GO:0016235	aggresome	0.000221819	0.0359246	2	1.34228	3	0.0174206
GO:0001733	galactosylceramide sulfotransferase activity	0.000221819	0.0359246	2	1.34228	3	0.0174206
GO:0050694	galactose 3-O-sulfotransferase activity	0.000221819	0.0359246	2	1.34228	3	0.0174206
GO:0005815	microtubule organizing center	0.00040435	0.064122	8	5.36913	204	1.1846
GO:0042612	MHC class I protein complex	0.000424968	0.0660163	4	2.68456	41	0.238081
GO:0044249	cellular biosynthetic process	0.000586646	0.0893094	23	15.4362	1272	7.38633
GO:0048002	antigen processing and presentation of peptide antigen	0.000779154	0.11629	4	2.68456	48	0.278729
GO:0042611	MHC protein complex	0.000909937	0.133198	4	2.68456	50	0.290343
GO:0005625	soluble fraction	0.000975998	0.140173	6	4.02685	131	0.760699
GO:0016607	nuclear speck	0.00134124	0.185624	5	3.3557	94	0.545845
GO:0006364	rRNA processing	0.00134124	0.185624	5	3.3557	94	0.545845
GO:0009653	anatomical structure morphogenesis	0.00139466	0.18957	18	12.0805	947	5.4991
GO:0007067	mitosis	0.00146517	0.195661	7	4.69799	193	1.12072
GO:0042590	antigen processing and presentation of exogenous peptide antigen via MHC class I	0.00151774	0.199005	2	1.34228	7	0.040648
GO:0016072	rRNA metabolic process	0.0015425	0.199005	5	3.3557	97	0.563266
GO:0004869	cysteine protease inhibitor activity	0.00238902	0.303081	3	2.01342	31	0.180013
GO:0042605	peptide antigen binding	0.00257242	0.320999	2	1.34228	9	0.0522618
GO:0016310	phosphorylation	0.00267082	0.327902	13	8.72483	615	3.57122
GO:0048856	anatomical structure development	0.00281881	0.340578	22	14.7651	1346	7.81604
GO:0006351	transcription, DNA-dependent	0.0031705	0.374423	4	2.68456	70	0.40648
GO:0046513	ceramide biosynthetic process	0.00319732	0.374423	2	1.34228	10	0.0580686
GO:0016043	cellular component organization and biogenesis	0.00348698	0.402157	28	18.7919	1906	11.0679
GO:0051301	cell division	0.00362764	0.412135	8	5.36913	288	1.67238
GO:0032774	RNA biosynthetic process	0.00387434	0.422535	4	2.68456	74	0.429708
GO:0016234	inclusion body	0.00388571	0.422535	2	1.34228	11	0.0638755
GO:0046520	sphingoid biosynthetic process	0.00388571	0.422535	2	1.34228	11	0.0638755
GO:0001701	embryonic development (sensu Mammalia)	0.00455499	0.488337	6	4.02685	178	1.03362
GO:0051082	unfolded protein binding	0.00467714	0.494468	4	2.68456	78	0.452935
GO:0006468	protein amino acid phosphorylation	0.00511151	0.532987	12	8.05369	588	3.41444
GO:0005871	kinesin complex	0.0054485	0.560448	2	1.34228	13	0.0754892
GO:0001916	positive regulation of T cell mediated cytotoxicity	0.00632067	0.641494	2	1.34228	14	0.0812961
GO:0018107	peptidyl-threonine phosphorylation	0.00725191	0.686037	2	1.34228	15	0.087103
GO:0006396	RNA processing	0.00738335	0.686037	10	6.71141	466	2.706
GO:0001914	regulation of T cell mediated cytotoxicity	0.00824114	0.686037	2	1.34228	16	0.0929098
GO:0019375	galactolipid biosynthetic process	0.00865223	0.686037	1	0.671141	1	0.00580686
GO:0016014	dystrobrevin complex	0.00865223	0.686037	1	0.671141	1	0.00580686
GO:0048677	axon extension involved in regeneration	0.00865223	0.686037	1	0.671141	1	0.00580686
GO:0006682	galactosylceramide biosynthetic process	0.00865223	0.686037	1	0.671141	1	0.00580686
GO:0002501	peptide antigen assembly with MHC protein complex	0.00865223	0.686037	1	0.671141	1	0.00580686
GO:0046476	glycosylceramide biosynthetic process	0.00865223	0.686037	1	0.671141	1	0.00580686
GO:0004686	eukaryotic elongation factor-2 kinase activity	0.00865223	0.686037	1	0.671141	1	0.00580686
GO:0000026	alpha-1,2-mannosyltransferase activity	0.00865223	0.686037	1	0.671141	1	0.00580686
GO:0008428	ribonuclease inhibitor activity	0.00865223	0.686037	1	0.671141	1	0.00580686
GO:0030550	acetylcholine receptor inhibitor activity	0.00865223	0.686037	1	0.671141	1	0.00580686
GO:0008445	D-aspartate oxidase activity	0.00865223	0.686037	1	0.671141	1	0.00580686
GO:0048682	sprouting of injured axon	0.00865223	0.686037	1	0.671141	1	0.00580686
GO:0019135	deoxyhypusine monooxygenase activity	0.00865223	0.686037	1	0.671141	1	0.00580686
GO:0005459	UDP-galactose transporter activity	0.00865223	0.686037	1	0.671141	1	0.00580686
GO:0004058	aromatic-L-amino-acid decarboxylase activity	0.00865223	0.686037	1	0.671141	1	0.00580686
GO:0015922	aspartate oxidase activity	0.00865223	0.686037	1	0.671141	1	0.00580686
GO:0030273	melanin-concentrating hormone receptor activity	0.00865223	0.686037	1	0.671141	1	0.00580686
GO:0002502	peptide antigen assembly with MHC class I protein complex	0.00865223	0.686037	1	0.671141	1	0.00580686
GO:0005057	receptor signaling protein activity	0.00899415	0.705796	4	2.68456	94	0.545845
GO:0018210	peptidyl-threonine modification	0.00928731	0.721364	2	1.34228	17	0.0987167
GO:0043009	embryonic development (sensu Vertebrata)	0.0101733	0.782197	6	4.02685	211	1.22525
GO:0007254	JNK cascade	0.0103894	0.790824	2	1.34228	18	0.104524
GO:0043228	non-membrane-bound organelle	0.010598	0.790887	24	16.1074	1693	9.83102
GO:0043232	intracellular non-membrane-bound organelle	0.010598	0.790887	24	16.1074	1693	9.83102
GO:0004702	receptor signaling protein serine/threonine kinase activity	0.0108432	0.801331	3	2.01342	53	0.307764
GO:0005624	membrane fraction	0.0110255	0.80388	11	7.38255	572	3.32153
GO:0009792	embryonic development (sensu Metazoa)	0.0110889	0.80388	6	4.02685	215	1.24848
GO:0016604	nuclear body	0.0112379	0.806997	5	3.3557	155	0.900064
GO:0022403	cell cycle phase	0.0116764	0.830649	7	4.69799	283	1.64334
GO:0051052	regulation of DNA metabolic process	0.0119926	0.837483	3	2.01342	55	0.319377
GO:0016782	transferase activity, transferring sulfur-containing groups	0.0119926	0.837483	3	2.01342	55	0.319377
GO:0019882	antigen processing and presentation	0.0122884	0.850343	4	2.68456	103	0.598107
GO:0031098	stress-activated protein kinase signaling pathway	0.012757	0.867005	2	1.34228	20	0.116137
GO:0031018	endocrine pancreas development	0.012757	0.867005	2	1.34228	20	0.116137
GO:0016301	kinase activity	0.0129437	0.871905	14	9.39597	830	4.8197
GO:0007049	cell cycle	0.0136754	0.913115	10	6.71141	512	2.97311
GO:0044432	endoplasmic reticulum part	0.01444	0.930163	11	7.38255	595	3.45508
GO:0044420	extracellular matrix part	0.0148637	0.930163	4	2.68456	109	0.632948
GO:0050839	cell adhesion molecule binding	0.015336	0.930163	2	1.34228	22	0.127751
GO:0000267	cell fraction	0.0156195	0.930163	12	8.05369	683	3.96609
GO:0006796	phosphate metabolic process	0.015665	0.930163	13	8.72483	766	4.44806
GO:0006793	phosphorus metabolic process	0.015665	0.930163	13	8.72483	766	4.44806
GO:0032190	acrosin binding	0.0172301	0.930163	1	0.671141	2	0.0116137
GO:0007258	JUN phosphorylation	0.0172301	0.930163	1	0.671141	2	0.0116137
GO:0016572	histone phosphorylation	0.0172301	0.930163	1	0.671141	2	0.0116137
GO:0003884	D-amino-acid oxidase activity	0.0172301	0.930163	1	0.671141	2	0.0116137
GO:0051352	negative regulation of ligase activity	0.0172301	0.930163	1	0.671141	2	0.0116137
GO:0004485	methylcrotonoyl-CoA carboxylase activity	0.0172301	0.930163	1	0.671141	2	0.0116137
GO:0043517	positive regulation of DNA damage response, signal transduction by p53 class mediator	0.0172301	0.930163	1	0.671141	2	0.0116137
GO:0051444	negative regulation of ubiquitin ligase activity	0.0172301	0.930163	1	0.671141	2	0.0116137
GO:0043512	inhibin A complex	0.0172301	0.930163	1	0.671141	2	0.0116137
GO:0043511	inhibin complex	0.0172301	0.930163	1	0.671141	2	0.0116137
GO:0048387	negative regulation of retinoic acid receptor signaling pathway	0.0172301	0.930163	1	0.671141	2	0.0116137
GO:0048385	regulation of retinoic acid receptor signaling pathway	0.0172301	0.930163	1	0.671141	2	0.0116137
GO:0005026	transforming growth factor beta receptor activity, type II	0.0172301	0.930163	1	0.671141	2	0.0116137
GO:0046516	hypusine metabolic process	0.0172301	0.930163	1	0.671141	2	0.0116137
GO:0046515	hypusine biosynthetic process	0.0172301	0.930163	1	0.671141	2	0.0116137
GO:0042824	MHC class I peptide loading complex	0.0172301	0.930163	1	0.671141	2	0.0116137
GO:0007320	insemination	0.0172301	0.930163	1	0.671141	2	0.0116137
GO:0008612	hypusine biosynthetic process from peptidyl-lysine	0.0172301	0.930163	1	0.671141	2	0.0116137
GO:0015165	pyrimidine nucleotide sugar transporter activity	0.0172301	0.930163	1	0.671141	2	0.0116137
GO:0004021	alanine transaminase activity	0.0172301	0.930163	1	0.671141	2	0.0116137
GO:0010149	senescence (sensu Magnoliophyta)	0.0172301	0.930163	1	0.671141	2	0.0116137
GO:0004857	enzyme inhibitor activity	0.019188	1	6	4.02685	243	1.41107
GO:0031072	heat shock protein binding	0.0195315	1	3	2.01342	66	0.383253
GO:0002478	antigen processing and presentation of exogenous peptide antigen	0.0195836	1	2	1.34228	25	0.145172
GO:0032502	developmental process	0.0231497	1	36	24.1611	3007	17.4612
GO:0005788	endoplasmic reticulum lumen	0.0236491	1	3	2.01342	71	0.412287
GO:0005178	integrin binding	0.0242632	1	2	1.34228	28	0.162592
GO:0005792	microsome	0.0253238	1	5	3.3557	191	1.10911
GO:0009897	external side of plasma membrane	0.0253238	1	5	3.3557	191	1.10911
GO:0006531	aspartate metabolic process	0.0257342	1	1	0.671141	3	0.0174206
GO:0008095	inositol-1,4,5-triphosphate receptor activity	0.0257342	1	1	0.671141	3	0.0174206
GO:0017049	GTP-Rho binding	0.0257342	1	1	0.671141	3	0.0174206
GO:0031284	positive regulation of guanylate cyclase activity	0.0257342	1	1	0.671141	3	0.0174206
GO:0032311	angiogenin-PRI complex	0.0257342	1	1	0.671141	3	0.0174206
GO:0043267	negative regulation of potassium ion transport	0.0257342	1	1	0.671141	3	0.0174206
GO:0043297	apical junction assembly	0.0257342	1	1	0.671141	3	0.0174206
GO:0001672	regulation of chromatin assembly or disassembly	0.0257342	1	1	0.671141	3	0.0174206
GO:0004517	nitric-oxide synthase activity	0.0257342	1	1	0.671141	3	0.0174206
GO:0004705	JUN kinase activity	0.0257342	1	1	0.671141	3	0.0174206
GO:0004792	thiosulfate sulfurtransferase activity	0.0257342	1	1	0.671141	3	0.0174206
GO:0005220	inositol 1,4,5-triphosphate-sensitive calcium-release channel activity	0.0257342	1	1	0.671141	3	0.0174206
GO:0016740	transferase activity	0.0266314	1	23	15.4362	1744	10.1272
GO:0019884	antigen processing and presentation of exogenous antigen	0.0276108	1	2	1.34228	30	0.174206
GO:0042598	vesicular fraction	0.0284319	1	5	3.3557	197	1.14395
GO:0006672	ceramide metabolic process	0.032956	1	2	1.34228	33	0.191627
GO:0001912	positive regulation of leukocyte mediated cytotoxicity	0.032956	1	2	1.34228	33	0.191627
GO:0005789	endoplasmic reticulum membrane	0.0330365	1	9	6.04027	509	2.95569
GO:0006457	protein folding	0.0334354	1	4	2.68456	140	0.812961
GO:0006527	arginine catabolic process	0.0341653	1	1	0.671141	4	0.0232275
GO:0006681	galactosylceramide metabolic process	0.0341653	1	1	0.671141	4	0.0232275
GO:0007043	intercellular junction assembly	0.0341653	1	1	0.671141	4	0.0232275
GO:0019374	galactolipid metabolic process	0.0341653	1	1	0.671141	4	0.0232275
GO:0019642	anaerobic glycolysis	0.0341653	1	1	0.671141	4	0.0232275
GO:0031557	induction of programmed cell death in response to chemical stimulus	0.0341653	1	1	0.671141	4	0.0232275
GO:0031558	induction of apoptosis in response to chemical stimulus	0.0341653	1	1	0.671141	4	0.0232275
GO:0043516	regulation of DNA damage response, signal transduction by p53 class mediator	0.0341653	1	1	0.671141	4	0.0232275
GO:0046934	phosphatidylinositol-4,5-bisphosphate 3-kinase activity	0.0341653	1	1	0.671141	4	0.0232275
GO:0001652	granular component	0.0341653	1	1	0.671141	4	0.0232275
GO:0004144	diacylglycerol O-acyltransferase activity	0.0341653	1	1	0.671141	4	0.0232275
GO:0004459	L-lactate dehydrogenase activity	0.0341653	1	1	0.671141	4	0.0232275
GO:0005783	endoplasmic reticulum	0.0344383	1	13	8.72483	855	4.96487
GO:0005913	cell-cell adherens junction	0.0348207	1	2	1.34228	34	0.197433
GO:0005681	spliceosome	0.0357234	1	4	2.68456	143	0.830381
GO:0009790	embryonic development	0.0361194	1	6	4.02685	282	1.63754
GO:0031016	pancreas development	0.0367255	1	2	1.34228	35	0.20324
GO:0046519	sphingoid metabolic process	0.0367255	1	2	1.34228	35	0.20324
GO:0004866	endopeptidase inhibitor activity	0.0381	1	4	2.68456	146	0.847802
GO:0016772	transferase activity, transferring phosphorus-containing groups	0.0407951	1	14	9.39597	967	5.61524
GO:0031965	nuclear membrane	0.0408759	1	3	2.01342	88	0.511004
GO:0016012	sarcoglycan complex	0.0425238	1	1	0.671141	5	0.0290343
GO:0030547	receptor inhibitor activity	0.0425238	1	1	0.671141	5	0.0290343
GO:0030548	acetylcholine receptor regulator activity	0.0425238	1	1	0.671141	5	0.0290343
GO:0031272	regulation of pseudopodium formation	0.0425238	1	1	0.671141	5	0.0290343
GO:0031274	positive regulation of pseudopodium formation	0.0425238	1	1	0.671141	5	0.0290343
GO:0031282	regulation of guanylate cyclase activity	0.0425238	1	1	0.671141	5	0.0290343
GO:0003846	2-acylglycerol O-acyltransferase activity	0.0425238	1	1	0.671141	5	0.0290343
GO:0004457	lactate dehydrogenase activity	0.0425238	1	1	0.671141	5	0.0290343
GO:0030414	protease inhibitor activity	0.0439911	1	4	2.68456	153	0.88845
GO:0006643	membrane lipid metabolic process	0.0453478	1	5	3.3557	224	1.30074
GO:0008152	metabolic process	0.0456367	1	76	51.0067	7546	43.8186
GO:0048812	neurite morphogenesis	0.0468728	1	3	2.01342	93	0.540038
GO:0048858	cell projection morphogenesis	0.0468728	1	3	2.01342	93	0.540038
GO:0042398	amino acid derivative biosynthetic process	0.0489504	1	2	1.34228	41	0.238081

## Sheet: Set3-GO
GO ACCESSION	GO Term	p-value	corrected p-value	Count in Selection	% Count in Selection	Count in Total	% Count in Total
GO:0044432	endoplasmic reticulum part	1.06644e-05	0.132298	29	8.3815	595	3.45508
GO:0005789	endoplasmic reticulum membrane	3.87026e-05	0.193611	25	7.22543	509	2.95569
GO:0005783	endoplasmic reticulum	5.32148e-05	0.193611	35	10.1156	855	4.96487
GO:0004739	pyruvate dehydrogenase (acetyl-transferring) activity	7.80342e-05	0.193611	3	0.867052	5	0.0290343
GO:0004738	pyruvate dehydrogenase activity	7.80342e-05	0.193611	3	0.867052	5	0.0290343
GO:0031461	cullin-RING ubiquitin ligase complex	0.000183449	0.379296	4	1.15607	15	0.087103
GO:0043161	proteasomal ubiquitin-dependent protein catabolic process	0.000253979	0.396408	5	1.44509	29	0.168399
GO:0006511	ubiquitin-dependent protein catabolic process	0.000255634	0.396408	11	3.17919	152	0.882643
GO:0009211	pyrimidine deoxyribonucleoside triphosphate metabolic process	0.000402535	0.471128	2	0.578035	2	0.0116137
GO:0050333	thiamin-triphosphatase activity	0.000402535	0.471128	2	0.578035	2	0.0116137
GO:0001967	suckling behavior	0.000417751	0.471128	3	0.867052	8	0.0464549
GO:0016624	oxidoreductase activity, acting on the aldehyde or oxo group of donors, disulfide as acceptor	0.00061731	0.589079	3	0.867052	9	0.0522618
GO:0000245	spliceosome assembly	0.00061731	0.589079	3	0.867052	9	0.0522618
GO:0016021	integral to membrane	0.000847264	0.750766	114	32.948	4366	25.3528
GO:0042723	thiamin and derivative metabolic process	0.00119152	0.869494	2	0.578035	3	0.0174206
GO:0046125	pyrimidine deoxyribonucleoside metabolic process	0.00119152	0.869494	2	0.578035	3	0.0174206
GO:0006772	thiamin metabolic process	0.00119152	0.869494	2	0.578035	3	0.0174206
GO:0031975	envelope	0.00149795	0.978042	7	2.02312	84	0.487777
GO:0031967	organelle envelope	0.00149795	0.978042	7	2.02312	84	0.487777
GO:0000151	ubiquitin ligase complex	0.00163313	0.980324	6	1.7341	63	0.365832
GO:0031224	intrinsic to membrane	0.00173195	0.980324	115	33.237	4496	26.1077
GO:0006643	membrane lipid metabolic process	0.00197573	0.980324	12	3.46821	224	1.30074
GO:0030433	ER-associated protein catabolic process	0.00197985	0.980324	3	0.867052	13	0.0754892
GO:0031090	organelle membrane	0.00220211	0.980324	46	13.2948	1488	8.64061
GO:0044425	membrane part	0.00231031	0.980324	131	37.8613	5279	30.6544
GO:0048712	negative regulation of astrocyte differentiation	0.00235136	0.980324	2	0.578035	4	0.0232275
GO:0006650	glycerophospholipid metabolic process	0.00237637	0.980324	7	2.02312	91	0.528425
GO:0043231	intracellular membrane-bound organelle	0.00243037	0.980324	177	51.1561	7500	43.5515
GO:0043227	membrane-bound organelle	0.00248107	0.980324	177	51.1561	7503	43.5689
GO:0051099	positive regulation of binding	0.00248253	0.980324	3	0.867052	14	0.0812961
GO:0006515	misfolded or incompletely synthesized protein catabolic process	0.00248253	0.980324	3	0.867052	14	0.0812961
GO:0008654	phospholipid biosynthetic process	0.00252875	0.980324	7	2.02312	92	0.534231
GO:0046474	glycerophospholipid biosynthetic process	0.00293866	1	5	1.44509	49	0.284536
GO:0019941	modification-dependent protein catabolic process	0.00340767	1	21	6.06936	544	3.15893
GO:0043632	modification-dependent macromolecule catabolic process	0.00340767	1	21	6.06936	544	3.15893
GO:0006644	phospholipid metabolic process	0.00353709	1	10	2.89017	180	1.04524
GO:0031625	ubiquitin protein ligase binding	0.00370728	1	3	0.867052	16	0.0929098
GO:0007638	mechanosensory behavior	0.0038669	1	2	0.578035	5	0.0290343
GO:0016071	mRNA metabolic process	0.00393247	1	14	4.04624	308	1.78851
GO:0046467	membrane lipid biosynthetic process	0.00500332	1	7	2.02312	104	0.603914
GO:0051603	proteolysis involved in cellular protein catabolic process	0.0056645	1	21	6.06936	569	3.30411
GO:0048710	regulation of astrocyte differentiation	0.00572349	1	2	0.578035	6	0.0348412
GO:0044257	cellular protein catabolic process	0.00588869	1	21	6.06936	571	3.31572
GO:0006213	pyrimidine nucleoside metabolic process	0.00790686	1	2	0.578035	7	0.040648
GO:0009219	pyrimidine deoxyribonucleotide metabolic process	0.00790686	1	2	0.578035	7	0.040648
GO:0044265	cellular macromolecule catabolic process	0.00815902	1	25	7.22543	741	4.30289
GO:0030163	protein catabolic process	0.00855936	1	21	6.06936	591	3.43186
GO:0021766	hippocampus development	0.00932759	1	3	0.867052	22	0.127751
GO:0004842	ubiquitin-protein ligase activity	0.0102434	1	7	2.02312	119	0.691017
GO:0004559	alpha-mannosidase activity	0.0104032	1	2	0.578035	8	0.0464549
GO:0009120	deoxyribonucleoside metabolic process	0.0104032	1	2	0.578035	8	0.0464549
GO:0005635	nuclear envelope	0.0104521	1	5	1.44509	66	0.383253
GO:0021895	cerebral cortex neuron differentiation	0.0131992	1	2	0.578035	9	0.0522618
GO:0009057	macromolecule catabolic process	0.0154438	1	25	7.22543	783	4.54677
GO:0005765	lysosomal membrane	0.0156924	1	5	1.44509	73	0.423901
GO:0006282	regulation of DNA repair	0.0162818	1	2	0.578035	10	0.0580686
GO:0009154	purine ribonucleotide catabolic process	0.0162818	1	2	0.578035	10	0.0580686
GO:0043388	positive regulation of DNA binding	0.0162818	1	2	0.578035	10	0.0580686
GO:0045739	positive regulation of DNA repair	0.0162818	1	2	0.578035	10	0.0580686
GO:0000375	RNA splicing, via transesterification reactions	0.0164581	1	3	0.867052	27	0.156785
GO:0000377	RNA splicing, via transesterification reactions with bulged adenosine as nucleophile	0.0164581	1	3	0.867052	27	0.156785
GO:0000398	nuclear mRNA splicing, via spliceosome	0.0164581	1	3	0.867052	27	0.156785
GO:0005773	vacuole	0.0167629	1	10	2.89017	227	1.31816
GO:0006986	response to unfolded protein	0.0190757	1	4	1.15607	51	0.29615
GO:0003993	acid phosphatase activity	0.0196385	1	2	0.578035	11	0.0638755
GO:0014014	negative regulation of gliogenesis	0.0196385	1	2	0.578035	11	0.0638755
GO:0015800	acidic amino acid transport	0.0196385	1	2	0.578035	11	0.0638755
GO:0015813	glutamate transport	0.0196385	1	2	0.578035	11	0.0638755
GO:0016600	flotillin complex	0.0196385	1	2	0.578035	11	0.0638755
GO:0045686	negative regulation of glial cell differentiation	0.0196385	1	2	0.578035	11	0.0638755
GO:0016568	chromatin modification	0.0197184	1	10	2.89017	233	1.353
GO:0001681	sialate O-acetylesterase activity	0.0200917	1	1	0.289017	1	0.00580686
GO:0003882	CDP-diacylglycerol-serine O-phosphatidyltransferase activity	0.0200917	1	1	0.289017	1	0.00580686
GO:0004170	dUTP diphosphatase activity	0.0200917	1	1	0.289017	1	0.00580686
GO:0004336	galactosylceramidase activity	0.0200917	1	1	0.289017	1	0.00580686
GO:0004633	phosphopantothenoylcysteine decarboxylase activity	0.0200917	1	1	0.289017	1	0.00580686
GO:0005314	high-affinity glutamate transporter activity	0.0200917	1	1	0.289017	1	0.00580686
GO:0005521	lamin binding	0.0200917	1	1	0.289017	1	0.00580686
GO:0005684	U2-dependent spliceosome	0.0200917	1	1	0.289017	1	0.00580686
GO:0006235	dTTP biosynthetic process	0.0200917	1	1	0.289017	1	0.00580686
GO:0006653	lecithin metabolic process	0.0200917	1	1	0.289017	1	0.00580686
GO:0006683	galactosylceramide catabolic process	0.0200917	1	1	0.289017	1	0.00580686
GO:0008054	cyclin catabolic process	0.0200917	1	1	0.289017	1	0.00580686
GO:0008126	acetylesterase activity	0.0200917	1	1	0.289017	1	0.00580686
GO:0008187	poly-pyrimidine tract binding	0.0200917	1	1	0.289017	1	0.00580686
GO:0008897	phosphopantetheinyltransferase activity	0.0200917	1	1	0.289017	1	0.00580686
GO:0009148	pyrimidine nucleoside triphosphate biosynthetic process	0.0200917	1	1	0.289017	1	0.00580686
GO:0009212	pyrimidine deoxyribonucleoside triphosphate biosynthetic process	0.0200917	1	1	0.289017	1	0.00580686
GO:0009449	gamma-aminobutyric acid biosynthetic process	0.0200917	1	1	0.289017	1	0.00580686
GO:0016560	protein import into peroxisome matrix, docking	0.0200917	1	1	0.289017	1	0.00580686
GO:0019376	galactolipid catabolic process	0.0200917	1	1	0.289017	1	0.00580686
GO:0021999	neural plate anterioposterior pattern formation	0.0200917	1	1	0.289017	1	0.00580686
GO:0030343	vitamin D3 25-hydroxylase activity	0.0200917	1	1	0.289017	1	0.00580686
GO:0031372	UBC13-MMS2 complex	0.0200917	1	1	0.289017	1	0.00580686
GO:0032388	positive regulation of intracellular transport	0.0200917	1	1	0.289017	1	0.00580686
GO:0035268	protein amino acid mannosylation	0.0200917	1	1	0.289017	1	0.00580686
GO:0035269	protein amino acid O-linked mannosylation	0.0200917	1	1	0.289017	1	0.00580686
GO:0042171	lysophosphatidic acid acyltransferase activity	0.0200917	1	1	0.289017	1	0.00580686
GO:0042392	sphingosine-1-phosphate phosphatase activity	0.0200917	1	1	0.289017	1	0.00580686
GO:0043274	phospholipase binding	0.0200917	1	1	0.289017	1	0.00580686
GO:0045127	N-acetylglucosamine kinase activity	0.0200917	1	1	0.289017	1	0.00580686
GO:0045130	keratan sulfotransferase activity	0.0200917	1	1	0.289017	1	0.00580686
GO:0046038	GMP catabolic process	0.0200917	1	1	0.289017	1	0.00580686
GO:0046075	dTTP metabolic process	0.0200917	1	1	0.289017	1	0.00580686
GO:0046080	dUTP metabolic process	0.0200917	1	1	0.289017	1	0.00580686
GO:0046358	butyrate biosynthetic process	0.0200917	1	1	0.289017	1	0.00580686
GO:0047173	phosphatidylcholine-retinol O-acyltransferase activity	0.0200917	1	1	0.289017	1	0.00580686
GO:0047273	galactosylgalactosylglucosylceramide beta-D-acetylgalactosaminyltransferase activity	0.0200917	1	1	0.289017	1	0.00580686
GO:0047372	acylglycerol lipase activity	0.0200917	1	1	0.289017	1	0.00580686
GO:0048137	spermatocyte division	0.0200917	1	1	0.289017	1	0.00580686
GO:0050178	phenylpyruvate tautomerase activity	0.0200917	1	1	0.289017	1	0.00580686
GO:0051443	positive regulation of ubiquitin ligase activity	0.0200917	1	1	0.289017	1	0.00580686
GO:0000729	DNA double-strand break processing	0.0200917	1	1	0.289017	1	0.00580686
GO:0006506	GPI anchor biosynthetic process	0.0218607	1	3	0.867052	30	0.174206
GO:0006766	vitamin metabolic process	0.0224458	1	5	1.44509	80	0.464549
GO:0009200	deoxyribonucleoside triphosphate metabolic process	0.023257	1	2	0.578035	12	0.0696824
GO:0009261	ribonucleotide catabolic process	0.023257	1	2	0.578035	12	0.0696824
GO:0006397	mRNA processing	0.0236628	1	11	3.17919	275	1.59689
GO:0006775	fat-soluble vitamin metabolic process	0.0238512	1	3	0.867052	31	0.180013
GO:0043285	biopolymer catabolic process	0.0253009	1	21	6.06936	658	3.82092
GO:0019787	small conjugating protein ligase activity	0.025566	1	7	2.02312	143	0.830381
GO:0005774	vacuolar membrane	0.025838	1	5	1.44509	83	0.48197
GO:0006505	GPI anchor metabolic process	0.0259365	1	3	0.867052	32	0.18582
GO:0030176	integral to endoplasmic reticulum membrane	0.0259365	1	3	0.867052	32	0.18582
GO:0004016	adenylate cyclase activity	0.0271256	1	2	0.578035	13	0.0754892
GO:0008484	sulfuric ester hydrolase activity	0.0271256	1	2	0.578035	13	0.0754892
GO:0000030	mannosyltransferase activity	0.0271256	1	2	0.578035	13	0.0754892
GO:0044248	cellular catabolic process	0.027363	1	29	8.3815	991	5.7546
GO:0005913	cell-cell adherens junction	0.0303907	1	3	0.867052	34	0.197433
GO:0046489	phosphoinositide biosynthetic process	0.0303907	1	3	0.867052	34	0.197433
GO:0006195	purine nucleotide catabolic process	0.0312328	1	2	0.578035	14	0.0812961
GO:0007405	neuroblast proliferation	0.0312328	1	2	0.578035	14	0.0812961
GO:0043488	regulation of mRNA stability	0.0312328	1	2	0.578035	14	0.0812961
GO:0051705	behavioral interaction between organisms	0.0327589	1	3	0.867052	35	0.20324
GO:0006171	cAMP biosynthetic process	0.0355675	1	2	0.578035	15	0.087103
GO:0009147	pyrimidine nucleoside triphosphate metabolic process	0.0355675	1	2	0.578035	15	0.087103
GO:0014013	regulation of gliogenesis	0.0355675	1	2	0.578035	15	0.087103
GO:0015923	mannosidase activity	0.0355675	1	2	0.578035	15	0.087103
GO:0045685	regulation of glial cell differentiation	0.0355675	1	2	0.578035	15	0.087103
GO:0000139	Golgi membrane	0.0367087	1	12	3.46821	332	1.92788
GO:0008374	O-acyltransferase activity	0.0377749	1	3	0.867052	37	0.214854
GO:0044437	vacuolar part	0.0379115	1	5	1.44509	92	0.534231
GO:0043283	biopolymer metabolic process	0.0393514	1	73	21.0983	2988	17.3509
GO:0003875	ADP-ribosylarginine hydrolase activity	0.039781	1	1	0.289017	2	0.0116137
GO:0004043	L-aminoadipate-semialdehyde dehydrogenase activity	0.039781	1	1	0.289017	2	0.0116137
GO:0004360	glutamine-fructose-6-phosphate transaminase (isomerizing) activity	0.039781	1	1	0.289017	2	0.0116137
GO:0004569	glycoprotein endo-alpha-1,2-mannosidase activity	0.039781	1	1	0.289017	2	0.0116137
GO:0004765	shikimate kinase activity	0.039781	1	1	0.289017	2	0.0116137
GO:0004795	threonine synthase activity	0.039781	1	1	0.289017	2	0.0116137
GO:0005784	translocon complex	0.039781	1	1	0.289017	2	0.0116137
GO:0006083	acetate metabolic process	0.039781	1	1	0.289017	2	0.0116137
GO:0006337	nucleosome disassembly	0.039781	1	1	0.289017	2	0.0116137
GO:0006654	phosphatidic acid biosynthetic process	0.039781	1	1	0.289017	2	0.0116137
GO:0006667	sphinganine metabolic process	0.039781	1	1	0.289017	2	0.0116137
GO:0006668	sphinganine-1-phosphate metabolic process	0.039781	1	1	0.289017	2	0.0116137
GO:0008432	JUN kinase binding	0.039781	1	1	0.289017	2	0.0116137
GO:0009088	threonine biosynthetic process	0.039781	1	1	0.289017	2	0.0116137
GO:0009125	nucleoside monophosphate catabolic process	0.039781	1	1	0.289017	2	0.0116137
GO:0009128	purine nucleoside monophosphate catabolic process	0.039781	1	1	0.289017	2	0.0116137
GO:0009158	ribonucleoside monophosphate catabolic process	0.039781	1	1	0.289017	2	0.0116137
GO:0009169	purine ribonucleoside monophosphate catabolic process	0.039781	1	1	0.289017	2	0.0116137
GO:0009202	deoxyribonucleoside triphosphate biosynthetic process	0.039781	1	1	0.289017	2	0.0116137
GO:0009296	flagellum biogenesis	0.039781	1	1	0.289017	2	0.0116137
GO:0009384	N-acylmannosamine kinase activity	0.039781	1	1	0.289017	2	0.0116137
GO:0017182	peptidyl-diphthamide metabolic process	0.039781	1	1	0.289017	2	0.0116137
GO:0017183	peptidyl-diphthamide biosynthetic process from peptidyl-histidine	0.039781	1	1	0.289017	2	0.0116137
GO:0019807	aspartoacylase activity	0.039781	1	1	0.289017	2	0.0116137
GO:0021997	neural plate pattern formation	0.039781	1	1	0.289017	2	0.0116137
GO:0030144	alpha-1,6-mannosyl-glycoprotein 6-beta-N-acetylglucosaminyltransferase activity	0.039781	1	1	0.289017	2	0.0116137
GO:0030314	junctional membrane complex	0.039781	1	1	0.289017	2	0.0116137
GO:0031223	auditory behavior	0.039781	1	1	0.289017	2	0.0116137
GO:0031371	ubiquitin conjugating enzyme complex	0.039781	1	1	0.289017	2	0.0116137
GO:0031498	chromatin disassembly	0.039781	1	1	0.289017	2	0.0116137
GO:0042339	keratan sulfate metabolic process	0.039781	1	1	0.289017	2	0.0116137
GO:0042373	vitamin K metabolic process	0.039781	1	1	0.289017	2	0.0116137
GO:0045899	positive regulation of transcriptional preinitiation complex formation	0.039781	1	1	0.289017	2	0.0116137
GO:0047749	cholestanetriol 26-monooxygenase activity	0.039781	1	1	0.289017	2	0.0116137
GO:0047804	cysteine-S-conjugate beta-lyase activity	0.039781	1	1	0.289017	2	0.0116137
GO:0048199	vesicle targeting, to, from or within Golgi	0.039781	1	1	0.289017	2	0.0116137
GO:0048670	regulation of collateral sprouting	0.039781	1	1	0.289017	2	0.0116137
GO:0048671	negative regulation of collateral sprouting	0.039781	1	1	0.289017	2	0.0116137
GO:0051725	protein amino acid de-ADP-ribosylation	0.039781	1	1	0.289017	2	0.0116137
GO:0000268	peroxisome targeting sequence binding	0.039781	1	1	0.289017	2	0.0116137
GO:0016607	nuclear speck	0.0409924	1	5	1.44509	94	0.545845
GO:0030384	phosphoinositide metabolic process	0.0416454	1	4	1.15607	65	0.377446
GO:0044464	cell part	0.0419801	1	294	84.9711	14001	81.3019
GO:0044422	organelle part	0.0429404	1	92	26.5896	3888	22.5771
GO:0044446	intracellular organelle part	0.0429404	1	92	26.5896	3888	22.5771
GO:0051098	regulation of binding	0.043159	1	3	0.867052	39	0.226468
GO:0016780	phosphotransferase activity, for other substituted phosphate groups	0.0448767	1	2	0.578035	17	0.0987167
GO:0043487	regulation of RNA stability	0.0448767	1	2	0.578035	17	0.0987167
GO:0000904	cellular morphogenesis during differentiation	0.0459871	1	3	0.867052	40	0.232275
GO:0009056	catabolic process	0.0460891	1	30	8.67052	1082	6.28303
GO:0008270	zinc ion binding	0.0468072	1	53	15.3179	2100	12.1944
GO:0035250	UDP-galactosyltransferase activity	0.0498308	1	2	0.578035	18	0.104524

## Sheet: Set4-GO
GO ACCESSION	GO Term	p-value	corrected p-value	Count in Selection	% Count in Selection	Count in Total	% Count in Total
GO:0007156	homophilic cell adhesion	2.55803e-09	2.78288e-05	16	5.03145	131	0.760699
GO:0030286	dynein complex	2.95583e-06	0.0160782	7	2.20126	35	0.20324
GO:0016337	cell-cell adhesion	2.26756e-05	0.0822292	17	5.34591	284	1.64915
GO:0016406	carnitine O-acyltransferase activity	0.00020662	0.505588	3	0.943396	7	0.040648
GO:0016746	transferase activity, transferring acyl groups	0.000232369	0.505588	12	3.77358	191	1.10911
GO:0005875	microtubule associated complex	0.000430474	0.704164	8	2.51572	97	0.563266
GO:0003777	microtubule motor activity	0.000464397	0.704164	7	2.20126	75	0.435515
GO:0008415	acyltransferase activity	0.000531034	0.704164	11	3.45912	180	1.04524
GO:0016747	transferase activity, transferring groups other than amino-acyl groups	0.000582544	0.704164	11	3.45912	182	1.05685
GO:0007286	spermatid development	0.000715661	0.778566	5	1.57233	39	0.226468
GO:0032226	positive regulation of synaptic transmission, dopaminergic	0.00100733	0.942423	2	0.628931	3	0.0174206
GO:0031224	intrinsic to membrane	0.00103954	0.942423	108	33.9623	4496	26.1077
GO:0016021	integral to membrane	0.00122116	1	105	33.0189	4366	25.3528
GO:0007126	meiosis	0.00135521	1	6	1.88679	66	0.383253
GO:0032225	regulation of synaptic transmission, dopaminergic	0.00199004	1	2	0.628931	4	0.0232275
GO:0007155	cell adhesion	0.00252246	1	22	6.91824	616	3.57703
GO:0022610	biological adhesion	0.00257261	1	22	6.91824	617	3.58284
GO:0016409	palmitoyltransferase activity	0.00292199	1	3	0.943396	16	0.0929098
GO:0007283	spermatogenesis	0.00296966	1	11	3.45912	223	1.29493
GO:0048232	male gamete generation	0.00296966	1	11	3.45912	223	1.29493
GO:0005509	calcium ion binding	0.00297784	1	28	8.80503	867	5.03455
GO:0008237	metallopeptidase activity	0.00319903	1	10	3.14465	193	1.12072
GO:0004095	carnitine O-palmitoyltransferase activity	0.00327628	1	2	0.628931	5	0.0290343
GO:0015909	long-chain fatty acid transport	0.00327628	1	2	0.628931	5	0.0290343
GO:0016012	sarcoglycan complex	0.00327628	1	2	0.628931	5	0.0290343
GO:0016416	O-palmitoyltransferase activity	0.00327628	1	2	0.628931	5	0.0290343
GO:0045737	positive regulation of cyclin-dependent protein kinase activity	0.00327628	1	2	0.628931	5	0.0290343
GO:0008374	O-acyltransferase activity	0.00466234	1	4	1.25786	37	0.214854
GO:0004784	superoxide dismutase activity	0.00485456	1	2	0.628931	6	0.0348412
GO:0016417	S-acyltransferase activity	0.00485456	1	2	0.628931	6	0.0348412
GO:0016721	oxidoreductase activity, acting on superoxide radicals as acceptor	0.00485456	1	2	0.628931	6	0.0348412
GO:0005624	membrane fraction	0.00492576	1	20	6.28931	572	3.32153
GO:0007018	microtubule-based movement	0.0049947	1	7	2.20126	113	0.656176
GO:0005929	cilium	0.00523954	1	7	2.20126	114	0.661983
GO:0003774	motor activity	0.00555713	1	8	2.51572	145	0.841995
GO:0006801	superoxide metabolic process	0.00563263	1	3	0.943396	20	0.116137
GO:0006508	proteolysis	0.00570818	1	32	10.0629	1081	6.27722
GO:0001669	acrosome	0.00674914	1	4	1.25786	41	0.238081
GO:0005778	peroxisomal membrane	0.00735318	1	4	1.25786	42	0.243888
GO:0031903	microbody membrane	0.00735318	1	4	1.25786	42	0.243888
GO:0004114	3',5'-cyclic-nucleotide phosphodiesterase activity	0.00740488	1	3	0.943396	22	0.127751
GO:0008233	peptidase activity	0.00795631	1	21	6.60377	639	3.71059
GO:0000267	cell fraction	0.00834806	1	22	6.91824	683	3.96609
GO:0004112	cyclic-nucleotide phosphodiesterase activity	0.00840079	1	3	0.943396	23	0.133558
GO:0048008	platelet-derived growth factor receptor signaling pathway	0.00840079	1	3	0.943396	23	0.133558
GO:0007176	regulation of epidermal growth factor receptor activity	0.00884296	1	2	0.628931	8	0.0464549
GO:0016671	oxidoreductase activity, acting on sulfur group of donors, disulfide as acceptor	0.00884296	1	2	0.628931	8	0.0464549
GO:0005783	endoplasmic reticulum	0.00886836	1	26	8.1761	855	4.96487
GO:0044438	microbody part	0.0101227	1	4	1.25786	46	0.267116
GO:0044439	peroxisomal part	0.0101227	1	4	1.25786	46	0.267116
GO:0016667	oxidoreductase activity, acting on sulfur group of donors	0.0106183	1	3	0.943396	25	0.145172
GO:0030705	cytoskeleton-dependent intracellular transport	0.0122682	1	7	2.20126	134	0.77812
GO:0005777	peroxisome	0.0126749	1	6	1.88679	104	0.603914
GO:0003824	catalytic activity	0.0128582	1	115	36.1635	5208	30.2421
GO:0042579	microbody	0.0132411	1	6	1.88679	105	0.609721
GO:0006998	nuclear membrane organization and biogenesis	0.0138697	1	2	0.628931	10	0.0580686
GO:0015908	fatty acid transport	0.0138697	1	2	0.628931	10	0.0580686
GO:0047555	3',5'-cyclic-GMP phosphodiesterase activity	0.0138697	1	2	0.628931	10	0.0580686
GO:0044432	endoplasmic reticulum part	0.014913	1	19	5.97484	595	3.45508
GO:0004693	cyclin-dependent protein kinase activity	0.0159814	1	3	0.943396	29	0.168399
GO:0007276	gametogenesis	0.0160533	1	11	3.45912	282	1.63754
GO:0000238	zygotene	0.0184658	1	1	0.314465	1	0.00580686
GO:0004024	alcohol dehydrogenase activity, zinc-dependent	0.0184658	1	1	0.314465	1	0.00580686
GO:0004092	carnitine O-acetyltransferase activity	0.0184658	1	1	0.314465	1	0.00580686
GO:0004371	glycerone kinase activity	0.0184658	1	1	0.314465	1	0.00580686
GO:0004561	alpha-N-acetylglucosaminidase activity	0.0184658	1	1	0.314465	1	0.00580686
GO:0004742	dihydrolipoyllysine-residue acetyltransferase activity	0.0184658	1	1	0.314465	1	0.00580686
GO:0005503	all-trans retinal binding	0.0184658	1	1	0.314465	1	0.00580686
GO:0005967	mitochondrial pyruvate dehydrogenase complex	0.0184658	1	1	0.314465	1	0.00580686
GO:0006680	glucosylceramide catabolic process	0.0184658	1	1	0.314465	1	0.00580686
GO:0008330	protein tyrosine/threonine phosphatase activity	0.0184658	1	1	0.314465	1	0.00580686
GO:0008422	beta-glucosidase activity	0.0184658	1	1	0.314465	1	0.00580686
GO:0008579	JUN kinase phosphatase activity	0.0184658	1	1	0.314465	1	0.00580686
GO:0009000	selenocysteine lyase activity	0.0184658	1	1	0.314465	1	0.00580686
GO:0009249	protein-lipoylation	0.0184658	1	1	0.314465	1	0.00580686
GO:0015141	succinate transporter activity	0.0184658	1	1	0.314465	1	0.00580686
GO:0015379	potassium:chloride symporter activity	0.0184658	1	1	0.314465	1	0.00580686
GO:0015744	succinate transport	0.0184658	1	1	0.314465	1	0.00580686
GO:0016024	CDP-diacylglycerol biosynthetic process	0.0184658	1	1	0.314465	1	0.00580686
GO:0016137	glycoside metabolic process	0.0184658	1	1	0.314465	1	0.00580686
GO:0016139	glycoside catabolic process	0.0184658	1	1	0.314465	1	0.00580686
GO:0016140	O-glycoside metabolic process	0.0184658	1	1	0.314465	1	0.00580686
GO:0016142	O-glycoside catabolic process	0.0184658	1	1	0.314465	1	0.00580686
GO:0016176	superoxide-generating NADPH oxidase activator activity	0.0184658	1	1	0.314465	1	0.00580686
GO:0016929	SUMO-specific protease activity	0.0184658	1	1	0.314465	1	0.00580686
GO:0018065	protein-cofactor linkage	0.0184658	1	1	0.314465	1	0.00580686
GO:0019115	benzaldehyde dehydrogenase activity	0.0184658	1	1	0.314465	1	0.00580686
GO:0030128	clathrin coat of endocytic vesicle	0.0184658	1	1	0.314465	1	0.00580686
GO:0030523	dihydrolipoamide S-acyltransferase activity	0.0184658	1	1	0.314465	1	0.00580686
GO:0043244	regulation of protein complex disassembly	0.0184658	1	1	0.314465	1	0.00580686
GO:0045127	N-acetylglucosamine kinase activity	0.0184658	1	1	0.314465	1	0.00580686
GO:0045254	pyruvate dehydrogenase complex	0.0184658	1	1	0.314465	1	0.00580686
GO:0045824	negative regulation of innate immune response	0.0184658	1	1	0.314465	1	0.00580686
GO:0046341	CDP-diacylglycerol metabolic process	0.0184658	1	1	0.314465	1	0.00580686
GO:0047915	ganglioside galactosyltransferase activity	0.0184658	1	1	0.314465	1	0.00580686
GO:0051790	short-chain fatty acid biosynthetic process	0.0184658	1	1	0.314465	1	0.00580686
GO:0051791	medium-chain fatty acid metabolic process	0.0184658	1	1	0.314465	1	0.00580686
GO:0051792	medium-chain fatty acid biosynthetic process	0.0184658	1	1	0.314465	1	0.00580686
GO:0005741	mitochondrial outer membrane	0.0196331	1	5	1.57233	84	0.487777
GO:0043231	intracellular membrane-bound organelle	0.0201981	1	157	49.3711	7500	43.5515
GO:0043227	membrane-bound organelle	0.0205103	1	157	49.3711	7503	43.5689
GO:0018209	peptidyl-serine modification	0.0208342	1	3	0.943396	32	0.18582
GO:0030552	cAMP binding	0.0231809	1	2	0.628931	13	0.0754892
GO:0048745	smooth muscle development	0.0231809	1	2	0.628931	13	0.0754892
GO:0000030	mannosyltransferase activity	0.0231809	1	2	0.628931	13	0.0754892
GO:0016887	ATPase activity	0.0235686	1	11	3.45912	299	1.73625
GO:0031968	organelle outer membrane	0.030141	1	5	1.57233	94	0.545845
GO:0016787	hydrolase activity	0.0304175	1	51	16.0377	2129	12.3628
GO:0019867	outer membrane	0.0313532	1	5	1.57233	95	0.551652
GO:0016758	transferase activity, transferring hexosyl groups	0.0318952	1	7	2.20126	163	0.946519
GO:0044425	membrane part	0.0338262	1	113	35.5346	5279	30.6544
GO:0019953	sexual reproduction	0.0346998	1	11	3.45912	318	1.84658
GO:0000003	reproduction	0.0353732	1	11	3.45912	319	1.85239
GO:0043167	ion binding	0.0354547	1	87	27.3585	3948	22.9255
GO:0001716	L-amino-acid oxidase activity	0.0365917	1	1	0.314465	2	0.0116137
GO:0003960	NADPH:quinone reductase activity	0.0365917	1	1	0.314465	2	0.0116137
GO:0003998	acylphosphatase activity	0.0365917	1	1	0.314465	2	0.0116137
GO:0004108	citrate (Si)-synthase activity	0.0365917	1	1	0.314465	2	0.0116137
GO:0004315	3-oxoacyl-[acyl-carrier-protein] synthase activity	0.0365917	1	1	0.314465	2	0.0116137
GO:0004348	glucosylceramidase activity	0.0365917	1	1	0.314465	2	0.0116137
GO:0004605	phosphatidate cytidylyltransferase activity	0.0365917	1	1	0.314465	2	0.0116137
GO:0004658	propionyl-CoA carboxylase activity	0.0365917	1	1	0.314465	2	0.0116137
GO:0006069	ethanol oxidation	0.0365917	1	1	0.314465	2	0.0116137
GO:0006086	acetyl-CoA biosynthetic process from pyruvate	0.0365917	1	1	0.314465	2	0.0116137
GO:0006842	tricarboxylic acid transport	0.0365917	1	1	0.314465	2	0.0116137
GO:0008078	mesodermal cell migration	0.0365917	1	1	0.314465	2	0.0116137
GO:0009384	N-acylmannosamine kinase activity	0.0365917	1	1	0.314465	2	0.0116137
GO:0015137	citrate transporter activity	0.0365917	1	1	0.314465	2	0.0116137
GO:0015142	tricarboxylic acid transporter activity	0.0365917	1	1	0.314465	2	0.0116137
GO:0015746	citrate transport	0.0365917	1	1	0.314465	2	0.0116137
GO:0016418	S-acetyltransferase activity	0.0365917	1	1	0.314465	2	0.0116137
GO:0016580	Sin3 complex	0.0365917	1	1	0.314465	2	0.0116137
GO:0016926	protein desumoylation	0.0365917	1	1	0.314465	2	0.0116137
GO:0019706	protein-cysteine S-palmitoleyltransferase activity	0.0365917	1	1	0.314465	2	0.0116137
GO:0019707	protein-cysteine S-acyltransferase activity	0.0365917	1	1	0.314465	2	0.0116137
GO:0019770	IgG receptor activity	0.0365917	1	1	0.314465	2	0.0116137
GO:0031987	locomotion during locomotory behavior	0.0365917	1	1	0.314465	2	0.0116137
GO:0032695	negative regulation of interleukin-12 production	0.0365917	1	1	0.314465	2	0.0116137
GO:0045143	homologous chromosome segregation	0.0365917	1	1	0.314465	2	0.0116137
GO:0047134	protein-disulfide reductase activity	0.0365917	1	1	0.314465	2	0.0116137
GO:0000033	alpha-1,3-mannosyltransferase activity	0.0365917	1	1	0.314465	2	0.0116137
GO:0008081	phosphoric diester hydrolase activity	0.038679	1	4	1.25786	69	0.400674
GO:0046872	metal ion binding	0.0400545	1	85	26.7296	3868	22.4609
GO:0005788	endoplasmic reticulum lumen	0.0422654	1	4	1.25786	71	0.412287
GO:0006664	glycolipid metabolic process	0.0428086	1	2	0.628931	18	0.104524
GO:0050806	positive regulation of synaptic transmission	0.0428086	1	2	0.628931	18	0.104524
GO:0004180	carboxypeptidase activity	0.0447455	1	3	0.943396	43	0.249695
GO:0006457	protein folding	0.0456236	1	6	1.88679	140	0.812961
GO:0019941	modification-dependent protein catabolic process	0.0459475	1	16	5.03145	544	3.15893
GO:0043632	modification-dependent macromolecule catabolic process	0.0459475	1	16	5.03145	544	3.15893
GO:0019783	small conjugating protein-specific protease activity	0.0460333	1	4	1.25786	73	0.423901
GO:0007017	microtubule-based process	0.0466479	1	8	2.51572	215	1.24848
GO:0001673	male germ cell nucleus	0.0472739	1	2	0.628931	19	0.11033
GO:0016208	AMP binding	0.0472739	1	2	0.628931	19	0.11033
GO:0030551	cyclic nucleotide binding	0.0472739	1	2	0.628931	19	0.11033
GO:0030901	midbrain development	0.0472739	1	2	0.628931	19	0.11033
GO:0051971	positive regulation of transmission of nerve impulse	0.0472739	1	2	0.628931	19	0.11033
GO:0008238	exopeptidase activity	0.0499825	1	4	1.25786	75	0.435515

## Sheet: Set5-GO
GO ACCESSION	GO Term	p-value	corrected p-value	Count in Selection	% Count in Selection	Count in Total	% Count in Total
GO:0007156	homophilic cell adhesion	5.92513e-11	7.02302e-07	17	5.96491	131	0.760699
GO:0016337	cell-cell adhesion	2.97061e-07	0.00176052	19	6.66667	284	1.64915
GO:0043167	ion binding	3.96816e-06	0.0156781	99	34.7368	3948	22.9255
GO:0043169	cation binding	6.15639e-06	0.0182428	91	31.9298	3569	20.7247
GO:0046872	metal ion binding	9.59178e-06	0.0227382	96	33.6842	3868	22.4609
GO:0005509	calcium ion binding	2.01877e-05	0.0398805	32	11.2281	867	5.03455
GO:0007155	cell adhesion	0.000101687	0.154439	24	8.42105	616	3.57703
GO:0022610	biological adhesion	0.000104237	0.154439	24	8.42105	617	3.58284
GO:0045039	protein import into mitochondrial inner membrane	0.000238631	0.250612	3	1.05263	8	0.0464549
GO:0042719	mitochondrial intermembrane space protein transporter complex	0.000238631	0.250612	3	1.05263	8	0.0464549
GO:0051305	chromosome movement towards spindle pole	0.000274865	0.250612	2	0.701754	2	0.0116137
GO:0040038	polar body extrusion after meiotic divisions	0.000274865	0.250612	2	0.701754	2	0.0116137
GO:0016344	meiotic chromosome movement towards spindle pole	0.000274865	0.250612	2	0.701754	2	0.0116137
GO:0043681	protein import into mitochondrion	0.000353551	0.281873	3	1.05263	9	0.0522618
GO:0001824	blastocyst development	0.000356713	0.281873	4	1.40351	21	0.121944
GO:0005624	membrane fraction	0.000603785	0.447289	21	7.36842	572	3.32153
GO:0007007	inner mitochondrial membrane organization and biogenesis	0.000677546	0.472406	3	1.05263	11	0.0638755
GO:0051295	establishment of meiotic spindle localization	0.000815528	0.520729	2	0.701754	3	0.0174206
GO:0007006	mitochondrial membrane organization and biogenesis	0.000834718	0.520729	4	1.40351	26	0.150978
GO:0006626	protein targeting to mitochondrion	0.00114583	0.679072	3	1.05263	13	0.0754892
GO:0004594	pantothenate kinase activity	0.00161315	0.869114	2	0.701754	4	0.0232275
GO:0007132	meiotic metaphase I	0.00161315	0.869114	2	0.701754	4	0.0232275
GO:0000267	cell fraction	0.00240851	1	22	7.7193	683	3.96609
GO:0019953	sexual reproduction	0.00263977	1	13	4.5614	318	1.84658
GO:0051293	establishment of spindle localization	0.00265909	1	2	0.701754	5	0.0290343
GO:0051648	vesicle localization	0.00265909	1	2	0.701754	5	0.0290343
GO:0000003	reproduction	0.00271202	1	13	4.5614	319	1.85239
GO:0007276	gametogenesis	0.00275425	1	12	4.21053	282	1.63754
GO:0016044	membrane organization and biogenesis	0.00300131	1	12	4.21053	285	1.65496
GO:0008270	zinc ion binding	0.00330266	1	51	17.8947	2100	12.1944
GO:0031497	chromatin assembly	0.00339753	1	7	2.45614	117	0.679403
GO:0006333	chromatin assembly or disassembly	0.00362264	1	8	2.80702	150	0.87103
GO:0008239	dipeptidyl-peptidase activity	0.00394496	1	2	0.701754	6	0.0348412
GO:0015937	coenzyme A biosynthetic process	0.00394496	1	2	0.701754	6	0.0348412
GO:0016806	dipeptidyl-peptidase and tripeptidyl-peptidase activity	0.00394496	1	2	0.701754	6	0.0348412
GO:0051303	establishment of chromosome localization	0.00394496	1	2	0.701754	6	0.0348412
GO:0000786	nucleosome	0.00408095	1	6	2.10526	91	0.528425
GO:0007283	spermatogenesis	0.00421212	1	10	3.50877	223	1.29493
GO:0048232	male gamete generation	0.00421212	1	10	3.50877	223	1.29493
GO:0044437	vacuolar part	0.00430626	1	6	2.10526	92	0.534231
GO:0051656	establishment of organelle localization	0.00483036	1	3	1.05263	21	0.121944
GO:0051216	cartilage development	0.00507732	1	4	1.40351	42	0.243888
GO:0008076	voltage-gated potassium channel complex	0.00542225	1	5	1.75439	68	0.394867
GO:0008443	phosphofructokinase activity	0.00546254	1	2	0.701754	7	0.040648
GO:0006334	nucleosome assembly	0.00614891	1	6	2.10526	99	0.574879
GO:0009952	anterior/posterior pattern formation	0.00655226	1	7	2.45614	132	0.766506
GO:0005952	cAMP-dependent protein kinase complex	0.00720385	1	2	0.701754	8	0.0464549
GO:0006376	mRNA splice site selection	0.00720385	1	2	0.701754	8	0.0464549
GO:0015936	coenzyme A metabolic process	0.00720385	1	2	0.701754	8	0.0464549
GO:0051323	metaphase	0.00720385	1	2	0.701754	8	0.0464549
GO:0005765	lysosomal membrane	0.0073085	1	5	1.75439	73	0.423901
GO:0019200	carbohydrate kinase activity	0.00888394	1	3	1.05263	26	0.150978
GO:0042613	MHC class II protein complex	0.00916108	1	2	0.701754	9	0.0522618
GO:0006839	mitochondrial transport	0.00987353	1	3	1.05263	27	0.156785
GO:0017038	protein import	0.0100944	1	4	1.40351	51	0.29615
GO:0005488	binding	0.0106774	1	217	76.1403	11985	69.5953
GO:0031401	positive regulation of protein modification	0.0113266	1	2	0.701754	10	0.0580686
GO:0005929	cilium	0.0119287	1	6	2.10526	114	0.661983
GO:0005774	vacuolar membrane	0.0123673	1	5	1.75439	83	0.48197
GO:0006687	glycosphingolipid metabolic process	0.0136931	1	2	0.701754	11	0.0638755
GO:0008603	cAMP-dependent protein kinase regulator activity	0.0162532	1	2	0.701754	12	0.0696824
GO:0000395	nuclear mRNA 5'-splice site recognition	0.0166076	1	1	0.350877	1	0.00580686
GO:0003947	(N-acetylneuraminyl)-galactosylglucosylceramide N-acetylgalactosaminyltransferase activity	0.0166076	1	1	0.350877	1	0.00580686
GO:0004092	carnitine O-acetyltransferase activity	0.0166076	1	1	0.350877	1	0.00580686
GO:0004375	glycine dehydrogenase (decarboxylating) activity	0.0166076	1	1	0.350877	1	0.00580686
GO:0004489	methylenetetrahydrofolate reductase (NADPH) activity	0.0166076	1	1	0.350877	1	0.00580686
GO:0004839	ubiquitin activating enzyme activity	0.0166076	1	1	0.350877	1	0.00580686
GO:0008887	glycerate kinase activity	0.0166076	1	1	0.350877	1	0.00580686
GO:0008970	phospholipase A1 activity	0.0166076	1	1	0.350877	1	0.00580686
GO:0015976	carbon utilization	0.0166076	1	1	0.350877	1	0.00580686
GO:0016263	glycoprotein-N-acetylgalactosamine 3-beta-galactosyltransferase activity	0.0166076	1	1	0.350877	1	0.00580686
GO:0016266	O-glycan processing	0.0166076	1	1	0.350877	1	0.00580686
GO:0016267	O-glycan processing, core 1	0.0166076	1	1	0.350877	1	0.00580686
GO:0016642	oxidoreductase activity, acting on the CH-NH2 group of donors, disulfide as acceptor	0.0166076	1	1	0.350877	1	0.00580686
GO:0017020	myosin phosphatase regulator activity	0.0166076	1	1	0.350877	1	0.00580686
GO:0017064	fatty acid amide hydrolase activity	0.0166076	1	1	0.350877	1	0.00580686
GO:0018872	arsonoacetate metabolic process	0.0166076	1	1	0.350877	1	0.00580686
GO:0019464	glycine decarboxylation via glycine cleavage system	0.0166076	1	1	0.350877	1	0.00580686
GO:0030322	stabilization of membrane potential	0.0166076	1	1	0.350877	1	0.00580686
GO:0030791	arsenite methyltransferase activity	0.0166076	1	1	0.350877	1	0.00580686
GO:0030792	methylarsonite methyltransferase activity	0.0166076	1	1	0.350877	1	0.00580686
GO:0032224	positive regulation of synaptic transmission, cholinergic	0.0166076	1	1	0.350877	1	0.00580686
GO:0032767	copper-dependent protein binding	0.0166076	1	1	0.350877	1	0.00580686
GO:0032790	ribosome disassembly	0.0166076	1	1	0.350877	1	0.00580686
GO:0035262	gonad morphogenesis	0.0166076	1	1	0.350877	1	0.00580686
GO:0042404	thyroid hormone catabolic process	0.0166076	1	1	0.350877	1	0.00580686
GO:0042660	positive regulation of cell fate specification	0.0166076	1	1	0.350877	1	0.00580686
GO:0042980	cystic fibrosis transmembrane conductance regulator binding	0.0166076	1	1	0.350877	1	0.00580686
GO:0043316	cytotoxic T cell degranulation	0.0166076	1	1	0.350877	1	0.00580686
GO:0045656	negative regulation of monocyte differentiation	0.0166076	1	1	0.350877	1	0.00580686
GO:0045659	negative regulation of neutrophil differentiation	0.0166076	1	1	0.350877	1	0.00580686
GO:0050430	syntaxin-6 binding	0.0166076	1	1	0.350877	1	0.00580686
GO:0050746	regulation of lipoprotein metabolic process	0.0166076	1	1	0.350877	1	0.00580686
GO:0051127	positive regulation of actin nucleation	0.0166076	1	1	0.350877	1	0.00580686
GO:0005261	cation channel activity	0.0178257	1	9	3.15789	237	1.37623
GO:0030552	cAMP binding	0.019	1	2	0.701754	13	0.0754892
GO:0005249	voltage-gated potassium channel activity	0.0202117	1	5	1.75439	94	0.545845
GO:0046914	transition metal ion binding	0.0211249	1	56	19.6491	2589	15.034
GO:0005262	calcium channel activity	0.0217302	1	4	1.40351	64	0.371639
GO:0005244	voltage-gated ion channel activity	0.0223234	1	7	2.45614	168	0.975553
GO:0006493	protein amino acid O-linked glycosylation	0.0250263	1	2	0.701754	15	0.087103
GO:0015106	bicarbonate transporter activity	0.0250263	1	2	0.701754	15	0.087103
GO:0015301	anion:anion antiporter activity	0.0250263	1	2	0.701754	15	0.087103
GO:0015380	anion exchanger activity	0.0250263	1	2	0.701754	15	0.087103
GO:0048477	oogenesis	0.0250263	1	2	0.701754	15	0.087103
GO:0032446	protein modification by small protein conjugation	0.0265945	1	5	1.75439	101	0.586493
GO:0043413	biopolymer glycosylation	0.0265945	1	5	1.75439	101	0.586493
GO:0005216	ion channel activity	0.0271831	1	11	3.85965	340	1.97433
GO:0007264	small GTPase mediated signal transduction	0.0282835	1	12	4.21053	386	2.24145
GO:0002495	antigen processing and presentation of peptide antigen via MHC class II	0.0282926	1	2	0.701754	16	0.0929098
GO:0015108	chloride transporter activity	0.0282926	1	2	0.701754	16	0.0929098
GO:0019886	antigen processing and presentation of exogenous peptide antigen via MHC class II	0.0282926	1	2	0.701754	16	0.0929098
GO:0009566	fertilization	0.0303803	1	3	1.05263	41	0.238081
GO:0002504	antigen processing and presentation of peptide or polysaccharide antigen via MHC class II	0.0317191	1	2	0.701754	17	0.0987167
GO:0031396	regulation of protein ubiquitination	0.0317191	1	2	0.701754	17	0.0987167
GO:0046851	negative regulation of bone remodeling	0.0317191	1	2	0.701754	17	0.0987167
GO:0051085	chaperone cofactor-dependent protein folding	0.0317191	1	2	0.701754	17	0.0987167
GO:0065004	protein-DNA complex assembly	0.0322726	1	6	2.10526	143	0.830381
GO:0003829	beta-1,3-galactosyl-O-glycosyl-glycoprotein beta-1,6-N-acetylglucosaminyltransferase activity	0.0329404	1	1	0.350877	2	0.0116137
GO:0004040	amidase activity	0.0329404	1	1	0.350877	2	0.0116137
GO:0004335	galactokinase activity	0.0329404	1	1	0.350877	2	0.0116137
GO:0004360	glutamine-fructose-6-phosphate transaminase (isomerizing) activity	0.0329404	1	1	0.350877	2	0.0116137
GO:0004368	glycerol-3-phosphate dehydrogenase activity	0.0329404	1	1	0.350877	2	0.0116137
GO:0004465	lipoprotein lipase activity	0.0329404	1	1	0.350877	2	0.0116137
GO:0004596	peptide alpha-N-acetyltransferase activity	0.0329404	1	1	0.350877	2	0.0116137
GO:0004800	thyroxine 5'-deiodinase activity	0.0329404	1	1	0.350877	2	0.0116137
GO:0008109	N-acetyllactosaminide beta-1,6-N-acetylglucosaminyltransferase activity	0.0329404	1	1	0.350877	2	0.0116137
GO:0009062	fatty acid catabolic process	0.0329404	1	1	0.350877	2	0.0116137
GO:0009996	negative regulation of cell fate specification	0.0329404	1	1	0.350877	2	0.0116137
GO:0010159	specification of organ position	0.0329404	1	1	0.350877	2	0.0116137
GO:0030314	junctional membrane complex	0.0329404	1	1	0.350877	2	0.0116137
GO:0030948	negative regulation of vascular endothelial growth factor receptor signaling pathway	0.0329404	1	1	0.350877	2	0.0116137
GO:0031489	myosin V binding	0.0329404	1	1	0.350877	2	0.0116137
GO:0042659	regulation of cell fate specification	0.0329404	1	1	0.350877	2	0.0116137
GO:0043320	natural killer cell degranulation	0.0329404	1	1	0.350877	2	0.0116137
GO:0045658	regulation of neutrophil differentiation	0.0329404	1	1	0.350877	2	0.0116137
GO:0045908	negative regulation of vasodilation	0.0329404	1	1	0.350877	2	0.0116137
GO:0051125	regulation of actin nucleation	0.0329404	1	1	0.350877	2	0.0116137
GO:0051583	dopamine uptake	0.0329404	1	1	0.350877	2	0.0116137
GO:0051934	catecholamine uptake during transmission of nerve impulse	0.0329404	1	1	0.350877	2	0.0116137
GO:0051937	catecholamine transport	0.0329404	1	1	0.350877	2	0.0116137
GO:0000156	two-component response regulator activity	0.0329404	1	1	0.350877	2	0.0116137
GO:0006664	glycolipid metabolic process	0.0352997	1	2	0.701754	18	0.104524
GO:0031399	regulation of protein modification	0.0352997	1	2	0.701754	18	0.104524
GO:0008238	exopeptidase activity	0.036147	1	4	1.40351	75	0.435515
GO:0015267	channel or pore class transporter activity	0.0380498	1	11	3.85965	359	2.08466
GO:0015268	alpha-type channel activity	0.0380498	1	11	3.85965	359	2.08466
GO:0005903	brush border	0.0390283	1	2	0.701754	19	0.11033
GO:0007292	female gamete generation	0.0390283	1	2	0.701754	19	0.11033
GO:0009395	phospholipid catabolic process	0.0390283	1	2	0.701754	19	0.11033
GO:0016208	AMP binding	0.0390283	1	2	0.701754	19	0.11033
GO:0030551	cyclic nucleotide binding	0.0390283	1	2	0.701754	19	0.11033
GO:0042417	dopamine metabolic process	0.0390283	1	2	0.701754	19	0.11033
GO:0051084	posttranslational protein folding	0.0390283	1	2	0.701754	19	0.11033
GO:0051640	organelle localization	0.0390283	1	2	0.701754	19	0.11033
GO:0000209	protein polyubiquitination	0.0390283	1	2	0.701754	19	0.11033
GO:0007005	mitochondrion organization and biogenesis	0.0392403	1	4	1.40351	77	0.447128
GO:0048704	embryonic skeletal morphogenesis	0.0407452	1	3	1.05263	46	0.267116
GO:0051241	negative regulation of multicellular organismal process	0.0407452	1	3	1.05263	46	0.267116
GO:0030217	T cell differentiation	0.0430061	1	3	1.05263	47	0.272923
GO:0044242	cellular lipid catabolic process	0.0430061	1	3	1.05263	47	0.272923
GO:0003002	regionalization	0.0445755	1	7	2.45614	195	1.13234
GO:0046850	regulation of bone remodeling	0.0453286	1	3	1.05263	48	0.278729
GO:0005932	basal body	0.0469064	1	2	0.701754	21	0.121944
GO:0048705	skeletal morphogenesis	0.0476149	1	4	1.40351	82	0.476163
GO:0004842	ubiquitin-protein ligase activity	0.0484368	1	5	1.75439	119	0.691017
GO:0000309	nicotinamide-nucleotide adenylyltransferase activity	0.0490028	1	1	0.350877	3	0.0174206
GO:0001574	ganglioside biosynthetic process	0.0490028	1	1	0.350877	3	0.0174206
GO:0001672	regulation of chromatin assembly or disassembly	0.0490028	1	1	0.350877	3	0.0174206
GO:0003872	6-phosphofructokinase activity	0.0490028	1	1	0.350877	3	0.0174206
GO:0004473	malate dehydrogenase (oxaloacetate-decarboxylating) (NADP+) activity	0.0490028	1	1	0.350877	3	0.0174206
GO:0004515	nicotinate-nucleotide adenylyltransferase activity	0.0490028	1	1	0.350877	3	0.0174206
GO:0005218	intracellular ligand-gated calcium channel activity	0.0490028	1	1	0.350877	3	0.0174206
GO:0005219	ryanodine-sensitive calcium-release channel activity	0.0490028	1	1	0.350877	3	0.0174206
GO:0005945	6-phosphofructokinase complex	0.0490028	1	1	0.350877	3	0.0174206
GO:0006198	cAMP catabolic process	0.0490028	1	1	0.350877	3	0.0174206
GO:0006688	glycosphingolipid biosynthetic process	0.0490028	1	1	0.350877	3	0.0174206
GO:0016531	copper chaperone activity	0.0490028	1	1	0.350877	3	0.0174206
GO:0016941	natriuretic peptide receptor activity	0.0490028	1	1	0.350877	3	0.0174206
GO:0019531	oxalate transporter activity	0.0490028	1	1	0.350877	3	0.0174206
GO:0019532	oxalate transport	0.0490028	1	1	0.350877	3	0.0174206
GO:0021860	pyramidal neuron development	0.0490028	1	1	0.350877	3	0.0174206
GO:0030853	negative regulation of granulocyte differentiation	0.0490028	1	1	0.350877	3	0.0174206
GO:0031430	M line	0.0490028	1	1	0.350877	3	0.0174206
GO:0032400	melanosome localization	0.0490028	1	1	0.350877	3	0.0174206
GO:0032402	melanosome transport	0.0490028	1	1	0.350877	3	0.0174206
GO:0042637	catagen	0.0490028	1	1	0.350877	3	0.0174206
GO:0043024	ribosomal small subunit binding	0.0490028	1	1	0.350877	3	0.0174206
GO:0045655	regulation of monocyte differentiation	0.0490028	1	1	0.350877	3	0.0174206
GO:0048027	mRNA 5'-UTR binding	0.0490028	1	1	0.350877	3	0.0174206
GO:0050951	sensory perception of temperature stimulus	0.0490028	1	1	0.350877	3	0.0174206
GO:0050955	thermoception	0.0490028	1	1	0.350877	3	0.0174206
GO:0050968	detection of chemical stimulus during sensory perception of pain	0.0490028	1	1	0.350877	3	0.0174206

## Sheet: Set6-GO
GO ACCESSION	GO Term	p-value	corrected p-value	Count in Selection	% Count in Selection	Count in Total	% Count in Total
GO:0006413	translational initiation	5.92439e-12	6.63866e-08	12	4.24028	45	0.261309
GO:0022618	protein-RNA complex assembly	1.27523e-09	7.1449e-06	12	4.24028	69	0.400674
GO:0003743	translation initiation factor activity	4.7259e-09	1.76523e-05	12	4.24028	77	0.447128
GO:0008135	translation factor activity, nucleic acid binding	9.40853e-07	0.00263572	12	4.24028	123	0.714244
GO:0045182	translation regulator activity	1.84539e-06	0.00413576	12	4.24028	131	0.760699
GO:0065003	macromolecule complex assembly	9.05396e-06	0.0169092	19	6.71378	359	2.08466
GO:0022607	cellular component assembly	2.44626e-05	0.0391599	20	7.06714	420	2.43888
GO:0004835	tubulin-tyrosine ligase activity	6.45065e-05	0.0903545	4	1.41343	14	0.0812961
GO:0004416	hydroxyacylglutathione hydrolase activity	0.000272943	0.30585	2	0.706714	2	0.0116137
GO:0005353	fructose transporter activity	0.000272943	0.30585	2	0.706714	2	0.0116137
GO:0043296	apical junction complex	0.000349934	0.356476	3	1.06007	9	0.0522618
GO:0031497	chromatin assembly	0.000733011	0.673699	8	2.82686	117	0.679403
GO:0000786	nucleosome	0.000781578	0.673699	7	2.4735	91	0.528425
GO:0006333	chromatin assembly or disassembly	0.000891907	0.713885	9	3.18021	150	0.87103
GO:0008514	organic anion transporter activity	0.00113431	0.847375	3	1.06007	13	0.0754892
GO:0006334	nucleosome assembly	0.00128548	0.900288	7	2.4735	99	0.574879
GO:0030506	ankyrin binding	0.00160199	0.997296	2	0.706714	4	0.0232275
GO:0005229	intracellular calcium activated chloride channel activity	0.00160199	0.997296	2	0.706714	4	0.0232275
GO:0048468	cell development	0.00195957	1	22	7.77385	674	3.91383
GO:0015711	organic anion transport	0.00256803	1	3	1.06007	17	0.0987167
GO:0060042	retina morphogenesis in camera-type eye	0.00391798	1	2	0.706714	6	0.0348412
GO:0001669	acrosome	0.00459629	1	4	1.41343	41	0.238081
GO:0009566	fertilization	0.00459629	1	4	1.41343	41	0.238081
GO:0002089	lens morphogenesis (sensu Vertebrata)	0.0054254	1	2	0.706714	7	0.040648
GO:0019953	sexual reproduction	0.00691005	1	12	4.24028	318	1.84658
GO:0000902	cell morphogenesis	0.00701583	1	9	3.18021	241	1.39945
GO:0000003	reproduction	0.00707729	1	12	4.24028	319	1.85239
GO:0006122	mitochondrial electron transport, ubiquinol to cytochrome c	0.00715514	1	2	0.706714	8	0.0464549
GO:0008121	ubiquinol-cytochrome-c reductase activity	0.00715514	1	2	0.706714	8	0.0464549
GO:0010259	multicellular organismal aging	0.00715514	1	2	0.706714	8	0.0464549
GO:0016679	oxidoreductase activity, acting on diphenols and related substances as donors	0.00715514	1	2	0.706714	8	0.0464549
GO:0016681	oxidoreductase activity, acting on diphenols and related substances as donors, cytochrome as acceptor	0.00715514	1	2	0.706714	8	0.0464549
GO:0000079	regulation of cyclin-dependent protein kinase activity	0.00879951	1	3	1.06007	26	0.150978
GO:0016043	cellular component organization and biogenesis	0.00901834	1	44	15.5477	1906	11.0679
GO:0015101	organic cation transporter activity	0.00909948	1	2	0.706714	9	0.0522618
GO:0015695	organic cation transport	0.00909948	1	2	0.706714	9	0.0522618
GO:0017069	snRNA binding	0.00909948	1	2	0.706714	9	0.0522618
GO:0042953	lipoprotein transport	0.00909948	1	2	0.706714	9	0.0522618
GO:0000175	3'-5'-exoribonuclease activity	0.00909948	1	2	0.706714	9	0.0522618
GO:0065004	protein-DNA complex assembly	0.00979812	1	7	2.4735	143	0.830381
GO:0004861	cyclin-dependent protein kinase inhibitor activity	0.0112509	1	2	0.706714	10	0.0580686
GO:0006820	anion transport	0.01322	1	6	2.12014	117	0.679403
GO:0015290	electrochemical potential-driven transporter activity	0.0139794	1	8	2.82686	190	1.1033
GO:0015291	porter activity	0.0139794	1	8	2.82686	190	1.1033
GO:0004532	exoribonuclease activity	0.0161458	1	2	0.706714	12	0.0696824
GO:0005217	intracellular ligand-gated ion channel activity	0.0161458	1	2	0.706714	12	0.0696824
GO:0015149	hexose transporter activity	0.0161458	1	2	0.706714	12	0.0696824
GO:0016896	exoribonuclease activity, producing 5'-phosphomonoesters	0.0161458	1	2	0.706714	12	0.0696824
GO:0045736	negative regulation of cyclin-dependent protein kinase activity	0.0161458	1	2	0.706714	12	0.0696824
GO:0000178	exosome (RNase complex)	0.0161458	1	2	0.706714	12	0.0696824
GO:0001555	oocyte growth	0.0165496	1	1	0.353357	1	0.00580686
GO:0001596	angiotensin type I receptor activity	0.0165496	1	1	0.353357	1	0.00580686
GO:0002066	columnar/cuboidal epithelial cell development	0.0165496	1	1	0.353357	1	0.00580686
GO:0003882	CDP-diacylglycerol-serine O-phosphatidyltransferase activity	0.0165496	1	1	0.353357	1	0.00580686
GO:0004397	histidine ammonia-lyase activity	0.0165496	1	1	0.353357	1	0.00580686
GO:0004723	calcium-dependent protein serine/threonine phosphatase activity	0.0165496	1	1	0.353357	1	0.00580686
GO:0004940	beta1-adrenergic receptor activity	0.0165496	1	1	0.353357	1	0.00580686
GO:0005354	galactose transporter activity	0.0165496	1	1	0.353357	1	0.00580686
GO:0005585	collagen type II	0.0165496	1	1	0.353357	1	0.00580686
GO:0006577	betaine metabolic process	0.0165496	1	1	0.353357	1	0.00580686
GO:0006578	betaine biosynthetic process	0.0165496	1	1	0.353357	1	0.00580686
GO:0007321	sperm displacement	0.0165496	1	1	0.353357	1	0.00580686
GO:0008448	N-acetylglucosamine-6-phosphate deacetylase activity	0.0165496	1	1	0.353357	1	0.00580686
GO:0008516	hexose uniporter activity	0.0165496	1	1	0.353357	1	0.00580686
GO:0008746	NAD(P) transhydrogenase activity	0.0165496	1	1	0.353357	1	0.00580686
GO:0008750	NAD(P)+ transhydrogenase (AB-specific) activity	0.0165496	1	1	0.353357	1	0.00580686
GO:0008812	choline dehydrogenase activity	0.0165496	1	1	0.353357	1	0.00580686
GO:0015284	fructose uniporter activity	0.0165496	1	1	0.353357	1	0.00580686
GO:0015292	uniporter activity	0.0165496	1	1	0.353357	1	0.00580686
GO:0015722	canalicular bile acid transport	0.0165496	1	1	0.353357	1	0.00580686
GO:0015757	galactose transport	0.0165496	1	1	0.353357	1	0.00580686
GO:0016167	glial cell line-derived neurotrophic factor receptor activity	0.0165496	1	1	0.353357	1	0.00580686
GO:0016652	oxidoreductase activity, acting on NADH or NADPH, NAD or NADP as acceptor	0.0165496	1	1	0.353357	1	0.00580686
GO:0019285	glycine betaine biosynthetic process from choline	0.0165496	1	1	0.353357	1	0.00580686
GO:0021934	hindbrain tangential cell migration	0.0165496	1	1	0.353357	1	0.00580686
GO:0021935	granule cell precursor tangential migration	0.0165496	1	1	0.353357	1	0.00580686
GO:0030116	glial cell line-derived neurotrophic factor receptor binding	0.0165496	1	1	0.353357	1	0.00580686
GO:0031455	glycine betaine metabolic process	0.0165496	1	1	0.353357	1	0.00580686
GO:0031456	glycine betaine biosynthetic process	0.0165496	1	1	0.353357	1	0.00580686
GO:0032444	activin responsive factor complex	0.0165496	1	1	0.353357	1	0.00580686
GO:0043203	axon hillock	0.0165496	1	1	0.353357	1	0.00580686
GO:0046692	sperm competition	0.0165496	1	1	0.353357	1	0.00580686
GO:0048635	negative regulation of muscle development	0.0165496	1	1	0.353357	1	0.00580686
GO:0051127	positive regulation of actin nucleation	0.0165496	1	1	0.353357	1	0.00580686
GO:0051790	short-chain fatty acid biosynthetic process	0.0165496	1	1	0.353357	1	0.00580686
GO:0051791	medium-chain fatty acid metabolic process	0.0165496	1	1	0.353357	1	0.00580686
GO:0051792	medium-chain fatty acid biosynthetic process	0.0165496	1	1	0.353357	1	0.00580686
GO:0016324	apical plasma membrane	0.0177953	1	6	2.12014	125	0.725858
GO:0015145	monosaccharide transporter activity	0.0188752	1	2	0.706714	13	0.0754892
GO:0008509	anion transporter activity	0.0197603	1	6	2.12014	128	0.743279
GO:0005887	integral to plasma membrane	0.0206978	1	11	3.88693	327	1.89884
GO:0005351	sugar porter activity	0.021415	1	3	1.06007	36	0.209047
GO:0009952	anterior/posterior pattern formation	0.0226032	1	6	2.12014	132	0.766506
GO:0005912	adherens junction	0.0243314	1	5	1.76678	99	0.574879
GO:0051119	sugar transporter activity	0.0247012	1	3	1.06007	38	0.220661
GO:0006493	protein amino acid O-linked glycosylation	0.0248638	1	2	0.706714	15	0.087103
GO:0015144	carbohydrate transporter activity	0.0264404	1	3	1.06007	39	0.226468
GO:0019207	kinase regulator activity	0.0272412	1	4	1.41343	102	0.5923
GO:0015298	solute:cation antiporter activity	0.0281099	1	2	0.706714	16	0.0929098
GO:0015299	solute:hydrogen antiporter activity	0.0281099	1	2	0.706714	16	0.0929098
GO:0030169	low-density lipoprotein binding	0.0281099	1	2	0.706714	16	0.0929098
GO:0030030	cell projection organization and biogenesis	0.0282172	1	6	2.12014	139	0.807154
GO:0009266	response to temperature stimulus	0.0301104	1	3	1.06007	41	0.238081
GO:0007339	binding of sperm to zona pellucida	0.0315155	1	2	0.706714	17	0.0987167
GO:0043197	dendritic spine	0.0315155	1	2	0.706714	17	0.0987167
GO:0046324	regulation of glucose import	0.0315155	1	2	0.706714	17	0.0987167
GO:0031226	intrinsic to plasma membrane	0.0318792	1	11	3.88693	350	2.0324
GO:0007283	spermatogenesis	0.0325621	1	8	2.82686	223	1.29493
GO:0048232	male gamete generation	0.0325621	1	8	2.82686	223	1.29493
GO:0001826	inner cell mass cell differentiation	0.0328262	1	1	0.353357	2	0.0116137
GO:0001921	positive regulation of receptor recycling	0.0328262	1	1	0.353357	2	0.0116137
GO:0002001	renin secretion into blood stream	0.0328262	1	1	0.353357	2	0.0116137
GO:0002018	renin-angiotensin regulation of aldosterone production	0.0328262	1	1	0.353357	2	0.0116137
GO:0002019	angiotensin mediated regulation of renal output	0.0328262	1	1	0.353357	2	0.0116137
GO:0003829	beta-1,3-galactosyl-O-glycosyl-glycoprotein beta-1,6-N-acetylglucosaminyltransferase activity	0.0328262	1	1	0.353357	2	0.0116137
GO:0004063	aryldialkylphosphatase activity	0.0328262	1	1	0.353357	2	0.0116137
GO:0004315	3-oxoacyl-[acyl-carrier-protein] synthase activity	0.0328262	1	1	0.353357	2	0.0116137
GO:0005030	neurotrophin receptor activity	0.0328262	1	1	0.353357	2	0.0116137
GO:0005536	glucose binding	0.0328262	1	1	0.353357	2	0.0116137
GO:0006068	ethanol catabolic process	0.0328262	1	1	0.353357	2	0.0116137
GO:0006337	nucleosome disassembly	0.0328262	1	1	0.353357	2	0.0116137
GO:0006603	phosphocreatine metabolic process	0.0328262	1	1	0.353357	2	0.0116137
GO:0008109	N-acetyllactosaminide beta-1,6-N-acetylglucosaminyltransferase activity	0.0328262	1	1	0.353357	2	0.0116137
GO:0015501	glutamate:sodium symporter activity	0.0328262	1	1	0.353357	2	0.0116137
GO:0015755	fructose transport	0.0328262	1	1	0.353357	2	0.0116137
GO:0016211	ammonia ligase activity	0.0328262	1	1	0.353357	2	0.0116137
GO:0019695	choline metabolic process	0.0328262	1	1	0.353357	2	0.0116137
GO:0021796	cerebral cortex regionalization	0.0328262	1	1	0.353357	2	0.0116137
GO:0031076	embryonic eye development (sensu Actinopterygii)	0.0328262	1	1	0.353357	2	0.0116137
GO:0031498	chromatin disassembly	0.0328262	1	1	0.353357	2	0.0116137
GO:0035054	embryonic heart tube anterior/posterior pattern formation	0.0328262	1	1	0.353357	2	0.0116137
GO:0040037	negative regulation of fibroblast growth factor receptor signaling pathway	0.0328262	1	1	0.353357	2	0.0116137
GO:0042482	positive regulation of odontogenesis	0.0328262	1	1	0.353357	2	0.0116137
GO:0042488	positive regulation of odontogenesis (sensu Vertebrata)	0.0328262	1	1	0.353357	2	0.0116137
GO:0043482	cellular pigment accumulation	0.0328262	1	1	0.353357	2	0.0116137
GO:0047696	beta-adrenergic receptor kinase activity	0.0328262	1	1	0.353357	2	0.0116137
GO:0048318	axial mesoderm development	0.0328262	1	1	0.353357	2	0.0116137
GO:0051125	regulation of actin nucleation	0.0328262	1	1	0.353357	2	0.0116137
GO:0051739	ammonia transporter activity	0.0328262	1	1	0.353357	2	0.0116137
GO:0051799	negative regulation of hair follicle development	0.0328262	1	1	0.353357	2	0.0116137
GO:0042995	cell projection	0.0328509	1	14	4.947	534	3.10087
GO:0015300	solute:solute antiporter activity	0.0350744	1	2	0.706714	18	0.104524
GO:0016796	exonuclease activity, active with either ribo- or deoxyribonucleic acids and producing 5'-phosphomonoesters	0.0350744	1	2	0.706714	18	0.104524
GO:0035036	sperm-egg recognition	0.0350744	1	2	0.706714	18	0.104524
GO:0003950	NAD+ ADP-ribosyltransferase activity	0.0387806	1	2	0.706714	19	0.11033
GO:0006637	acyl-CoA metabolic process	0.0387806	1	2	0.706714	19	0.11033
GO:0000074	regulation of progression through cell cycle	0.0402176	1	9	3.18021	319	1.85239
GO:0007389	pattern specification process	0.0407576	1	9	3.18021	276	1.60269
GO:0005929	cilium	0.0410425	1	5	1.76678	114	0.661983
GO:0005694	chromosome	0.0422451	1	7	2.4735	235	1.36461
GO:0001523	retinoid metabolic process	0.0426284	1	2	0.706714	20	0.116137
GO:0005740	mitochondrial envelope	0.0426284	1	2	0.706714	20	0.116137
GO:0006118	electron transport	0.0426284	1	2	0.706714	20	0.116137
GO:0003002	regionalization	0.0438864	1	7	2.4735	195	1.13234
GO:0008408	3'-5' exonuclease activity	0.0466121	1	2	0.706714	21	0.121944
GO:0009988	cell-cell recognition	0.0466121	1	2	0.706714	21	0.121944
GO:0016799	hydrolase activity, hydrolyzing N-glycosyl compounds	0.0466121	1	2	0.706714	21	0.121944
GO:0001996	positive regulation of heart contraction rate by epinephrine-norepinephrine	0.0488343	1	1	0.353357	3	0.0174206
GO:0001997	increased strength of heart contraction by epinephrine-norepinephrine	0.0488343	1	1	0.353357	3	0.0174206
GO:0002025	norepinephrine-epinephrine vasodilation during regulation of blood pressure	0.0488343	1	1	0.353357	3	0.0174206
GO:0002074	extraocular skeletal muscle development (sensu Mammalia)	0.0488343	1	1	0.353357	3	0.0174206
GO:0003953	NAD+ nucleosidase activity	0.0488343	1	1	0.353357	3	0.0174206
GO:0004064	arylesterase activity	0.0488343	1	1	0.353357	3	0.0174206
GO:0004090	carbonyl reductase (NADPH) activity	0.0488343	1	1	0.353357	3	0.0174206
GO:0004802	transketolase activity	0.0488343	1	1	0.353357	3	0.0174206
GO:0004939	beta-adrenergic receptor activity	0.0488343	1	1	0.353357	3	0.0174206
GO:0006659	phosphatidylserine biosynthetic process	0.0488343	1	1	0.353357	3	0.0174206
GO:0015696	ammonium transport	0.0488343	1	1	0.353357	3	0.0174206
GO:0016841	ammonia-lyase activity	0.0488343	1	1	0.353357	3	0.0174206
GO:0016880	acid-ammonia (or amide) ligase activity	0.0488343	1	1	0.353357	3	0.0174206
GO:0043476	pigment accumulation	0.0488343	1	1	0.353357	3	0.0174206
GO:0046459	short-chain fatty acid metabolic process	0.0488343	1	1	0.353357	3	0.0174206
GO:0048406	nerve growth factor binding	0.0488343	1	1	0.353357	3	0.0174206
GO:0048634	regulation of muscle development	0.0488343	1	1	0.353357	3	0.0174206
GO:0048637	skeletal muscle development	0.0488343	1	1	0.353357	3	0.0174206
GO:0051642	centrosome localization	0.0488343	1	1	0.353357	3	0.0174206

## Sheet: Set7-GO
GO ACCESSION	GO Term	p-value	corrected p-value	Count in Selection	% Count in Selection	Count in Total	% Count in Total
GO:0007276	gametogenesis	5.6e-45	7.0687e-41	67	14.7903	282	1.63754
GO:0019953	sexual reproduction	1.4e-44	7.0687e-41	70	15.4525	318	1.84658
GO:0000003	reproduction	1.7e-44	7.0687e-41	70	15.4525	319	1.85239
GO:0004617	phosphoglycerate dehydrogenase activity	2.43786e-21	7.68602e-18	13	2.86976	13	0.0754892
GO:0006566	threonine metabolic process	2.43965e-19	4.39523e-16	13	2.86976	15	0.087103
GO:0006564	L-serine biosynthetic process	2.43965e-19	4.39523e-16	13	2.86976	15	0.087103
GO:0021510	spinal cord development	2.43965e-19	4.39523e-16	13	2.86976	15	0.087103
GO:0009448	gamma-aminobutyric acid metabolic process	1.27026e-18	1.77993e-15	13	2.86976	16	0.0929098
GO:0019605	butyrate metabolic process	1.27026e-18	1.77993e-15	13	2.86976	16	0.0929098
GO:0019530	taurine metabolic process	1.85232e-17	2.33598e-14	13	2.86976	18	0.104524
GO:0009070	serine family amino acid biosynthetic process	5.72646e-17	6.01808e-14	13	2.86976	19	0.11033
GO:0006563	L-serine metabolic process	5.72646e-17	6.01808e-14	13	2.86976	19	0.11033
GO:0007283	spermatogenesis	6.95152e-16	6.26188e-13	33	7.28477	223	1.29493
GO:0048232	male gamete generation	6.95152e-16	6.26188e-13	33	7.28477	223	1.29493
GO:0006544	glycine metabolic process	2.19349e-15	1.84415e-12	13	2.86976	23	0.133558
GO:0009066	aspartate family amino acid metabolic process	1.09755e-14	8.65085e-12	14	3.09051	31	0.180013
GO:0021915	neural tube development	1.8555e-14	1.37646e-11	13	2.86976	26	0.150978
GO:0021782	glial cell development	6.36666e-14	4.46059e-11	13	2.86976	28	0.162592
GO:0006541	glutamine metabolic process	1.94095e-13	1.28829e-10	13	2.86976	30	0.174206
GO:0031175	neurite development	7.7342e-13	4.87684e-10	14	3.09051	40	0.232275
GO:0022008	neurogenesis	1.36634e-12	7.83227e-10	13	2.86976	34	0.197433
GO:0009069	serine family amino acid metabolic process	1.36634e-12	7.83227e-10	13	2.86976	34	0.197433
GO:0008652	amino acid biosynthetic process	2.45728e-11	1.34735e-08	14	3.09051	50	0.290343
GO:0009064	glutamine family amino acid metabolic process	7.72358e-11	4.05845e-08	14	3.09051	54	0.313571
GO:0009309	amine biosynthetic process	4.29514e-08	2.16666e-05	14	3.09051	85	0.493583
GO:0001669	acrosome	7.75712e-08	3.76253e-05	10	2.20751	41	0.238081
GO:0044271	nitrogen compound biosynthetic process	9.06306e-08	4.23315e-05	14	3.09051	90	0.522618
GO:0016363	nuclear matrix	1.0407e-07	4.68726e-05	11	2.42826	53	0.307764
GO:0051287	NAD binding	3.05147e-07	0.000132698	15	3.31126	114	0.661983
GO:0016616	oxidoreductase activity, acting on the CH-OH group of donors, NAD or NADP as acceptor	4.81119e-07	0.000202248	15	3.31126	118	0.68521
GO:0030030	cell projection organization and biogenesis	7.8691e-07	0.000320123	16	3.53201	139	0.807154
GO:0016614	oxidoreductase activity, acting on CH-OH group of donors	1.68584e-06	0.000664386	15	3.31126	130	0.754892
GO:0006575	amino acid derivative metabolic process	4.39106e-06	0.00167806	14	3.09051	123	0.714244
GO:0007342	fusion of sperm to egg plasma membrane	3.04132e-05	0.0112807	4	0.883002	8	0.0464549
GO:0003796	lysozyme activity	5.36055e-05	0.019315	4	0.883002	9	0.0522618
GO:0045026	plasma membrane fusion	8.74864e-05	0.0306472	4	0.883002	10	0.0580686
GO:0006508	proteolysis	0.000139199	0.0474447	49	10.8168	1081	6.27722
GO:0006520	amino acid metabolic process	0.000144059	0.0478089	16	3.53201	210	1.21944
GO:0005764	lysosome	0.000169675	0.0534947	16	3.53201	213	1.23686
GO:0000323	lytic vacuole	0.000169675	0.0534947	16	3.53201	213	1.23686
GO:0000902	cell morphogenesis	0.000227984	0.070125	17	3.75276	241	1.39945
GO:0005773	vacuole	0.000348731	0.102276	16	3.53201	227	1.31816
GO:0050662	coenzyme binding	0.000348731	0.102276	16	3.53201	227	1.31816
GO:0016998	cell wall catabolic process	0.000512139	0.146787	4	0.883002	15	0.087103
GO:0030154	cell differentiation	0.000615889	0.172601	45	9.93378	1033	5.99849
GO:0005227	calcium activated cation channel activity	0.00069047	0.185268	2	0.441501	2	0.0116137
GO:0002079	inner acrosomal membrane	0.00069047	0.185268	2	0.441501	2	0.0116137
GO:0048037	cofactor binding	0.000732076	0.192339	18	3.97351	291	1.6898
GO:0004620	phospholipase activity	0.00096462	0.248264	7	1.54525	60	0.348412
GO:0035036	sperm-egg recognition	0.00107844	0.272005	4	0.883002	18	0.104524
GO:0032318	regulation of Ras GTPase activity	0.00140073	0.343943	8	1.766	82	0.476163
GO:0005262	calcium channel activity	0.0014182	0.343943	7	1.54525	64	0.371639
GO:0009988	cell-cell recognition	0.00198166	0.458333	4	0.883002	21	0.121944
GO:0006944	membrane fusion	0.00198166	0.458333	4	0.883002	21	0.121944
GO:0002080	acrosomal membrane	0.00203524	0.458333	2	0.441501	3	0.0174206
GO:0004069	aspartate transaminase activity	0.00203524	0.458333	2	0.441501	3	0.0174206
GO:0007275	multicellular organismal development	0.00225915	0.499832	39	8.60927	919	5.33651
GO:0006519	amino acid and derivative metabolic process	0.00233129	0.506047	17	3.75276	297	1.72464
GO:0004553	hydrolase activity, hydrolyzing O-glycosyl compounds	0.0023675	0.506047	8	1.766	89	0.516811
GO:0004222	metalloendopeptidase activity	0.00297721	0.625766	9	1.98676	113	0.656176
GO:0008233	peptidase activity	0.00319137	0.659781	29	6.40177	639	3.71059
GO:0043087	regulation of GTPase activity	0.00355653	0.723415	8	1.766	95	0.551652
GO:0032856	activation of Ras GTPase	0.00399956	0.767298	2	0.441501	4	0.0232275
GO:0032862	activation of Rho GTPase	0.00399956	0.767298	2	0.441501	4	0.0232275
GO:0005519	cytoskeletal regulatory protein binding	0.00399956	0.767298	2	0.441501	4	0.0232275
GO:0015674	di-, tri-valent inorganic cation transport	0.00401564	0.767298	12	2.64901	187	1.08588
GO:0007229	integrin-mediated signaling pathway	0.00410353	0.772388	7	1.54525	77	0.447128
GO:0016298	lipase activity	0.00440859	0.817606	7	1.54525	78	0.452935
GO:0008237	metallopeptidase activity	0.00515857	0.942829	12	2.64901	193	1.12072
GO:0007338	fertilization (sensu Metazoa)	0.00530233	0.955261	3	0.662252	14	0.0812961
GO:0004623	phospholipase A2 activity	0.00586454	1	4	0.883002	28	0.162592
GO:0031638	zymogen activation	0.00655005	1	2	0.441501	5	0.0290343
GO:0042589	zymogen granule membrane	0.00655005	1	2	0.441501	5	0.0290343
GO:0009308	amine metabolic process	0.00782607	1	18	3.97351	363	2.10789
GO:0015929	hexosaminidase activity	0.00784553	1	3	0.662252	16	0.0929098
GO:0001578	microtubule bundle formation	0.00784553	1	3	0.662252	16	0.0929098
GO:0032787	monocarboxylic acid metabolic process	0.00845462	1	15	3.31126	284	1.64915
GO:0007026	negative regulation of microtubule depolymerization	0.00934319	1	3	0.662252	17	0.0987167
GO:0007339	binding of sperm to zona pellucida	0.00934319	1	3	0.662252	17	0.0987167
GO:0031114	regulation of microtubule depolymerization	0.00934319	1	3	0.662252	17	0.0987167
GO:0006816	calcium ion transport	0.00947995	1	8	1.766	112	0.650369
GO:0008081	phosphoric diester hydrolase activity	0.00950937	1	6	1.3245	69	0.400674
GO:0032321	positive regulation of Rho GTPase activity	0.00965464	1	2	0.441501	6	0.0348412
GO:0016798	hydrolase activity, acting on glycosyl bonds	0.0110236	1	8	1.766	115	0.667789
GO:0019861	flagellum	0.0125455	1	5	1.10375	53	0.307764
GO:0016042	lipid catabolic process	0.0127456	1	8	1.766	118	0.68521
GO:0060037	pharyngeal system development	0.0132825	1	2	0.441501	7	0.040648
GO:0001539	ciliary or flagellar motility	0.0132825	1	2	0.441501	7	0.040648
GO:0006807	nitrogen compound metabolic process	0.0147473	1	18	3.97351	388	2.25306
GO:0004629	phospholipase C activity	0.0147781	1	3	0.662252	20	0.116137
GO:0031111	negative regulation of microtubule polymerization or depolymerization	0.0147781	1	3	0.662252	20	0.116137
GO:0016789	carboxylic ester hydrolase activity	0.0167688	1	8	1.766	124	0.720051
GO:0004415	hyalurononglucosaminidase activity	0.0174042	1	2	0.441501	8	0.0464549
GO:0017146	N-methyl-D-aspartate selective glutamate receptor complex	0.0174042	1	2	0.441501	8	0.0464549
GO:0032320	positive regulation of Ras GTPase activity	0.0174042	1	2	0.441501	8	0.0464549
GO:0051336	regulation of hydrolase activity	0.0181995	1	11	2.42826	202	1.17299
GO:0008199	ferric iron binding	0.0192064	1	3	0.662252	22	0.127751
GO:0008236	serine-type peptidase activity	0.0200616	1	11	2.42826	205	1.19041
GO:0043666	regulation of phosphoprotein phosphatase activity	0.0219913	1	2	0.441501	9	0.0522618
GO:0048266	behavioral response to pain	0.0219913	1	2	0.441501	9	0.0522618
GO:0009566	fertilization	0.0222186	1	4	0.883002	41	0.238081
GO:0032313	regulation of Rab GTPase activity	0.0240625	1	4	0.883002	42	0.243888
GO:0009408	response to heat	0.0242882	1	3	0.662252	24	0.139365
GO:0004180	carboxypeptidase activity	0.0259963	1	4	0.883002	43	0.249695
GO:0002441	histamine secretion during acute inflammatory response	0.0263051	1	1	0.220751	1	0.00580686
GO:0002508	central tolerance induction	0.0263051	1	1	0.220751	1	0.00580686
GO:0002553	histamine secretion by mast cell	0.0263051	1	1	0.220751	1	0.00580686
GO:0002635	negative regulation of germinal center formation	0.0263051	1	1	0.220751	1	0.00580686
GO:0002646	regulation of central tolerance induction	0.0263051	1	1	0.220751	1	0.00580686
GO:0002648	positive regulation of central tolerance induction	0.0263051	1	1	0.220751	1	0.00580686
GO:0002895	regulation of central B cell tolerance induction	0.0263051	1	1	0.220751	1	0.00580686
GO:0002897	positive regulation of central B cell tolerance induction	0.0263051	1	1	0.220751	1	0.00580686
GO:0003834	beta-carotene 15,15'-monooxygenase activity	0.0263051	1	1	0.220751	1	0.00580686
GO:0004037	allantoicase activity	0.0263051	1	1	0.220751	1	0.00580686
GO:0004167	dopachrome isomerase activity	0.0263051	1	1	0.220751	1	0.00580686
GO:0004336	galactosylceramidase activity	0.0263051	1	1	0.220751	1	0.00580686
GO:0004508	steroid 17-alpha-monooxygenase activity	0.0263051	1	1	0.220751	1	0.00580686
GO:0005142	interleukin-11 receptor binding	0.0263051	1	1	0.220751	1	0.00580686
GO:0005368	taurine transporter activity	0.0263051	1	1	0.220751	1	0.00580686
GO:0005369	taurine:sodium symporter activity	0.0263051	1	1	0.220751	1	0.00580686
GO:0006683	galactosylceramide catabolic process	0.0263051	1	1	0.220751	1	0.00580686
GO:0007597	blood coagulation, intrinsic pathway	0.0263051	1	1	0.220751	1	0.00580686
GO:0008112	nicotinamide N-methyltransferase activity	0.0263051	1	1	0.220751	1	0.00580686
GO:0008296	3'-5'-exodeoxyribonuclease activity	0.0263051	1	1	0.220751	1	0.00580686
GO:0008310	single-stranded DNA specific 3'-5' exodeoxyribonuclease activity	0.0263051	1	1	0.220751	1	0.00580686
GO:0008456	alpha-N-acetylgalactosaminidase activity	0.0263051	1	1	0.220751	1	0.00580686
GO:0008859	exoribonuclease II activity	0.0263051	1	1	0.220751	1	0.00580686
GO:0015734	taurine transport	0.0263051	1	1	0.220751	1	0.00580686
GO:0016167	glial cell line-derived neurotrophic factor receptor activity	0.0263051	1	1	0.220751	1	0.00580686
GO:0018192	enzyme active site formation via L-cysteine persulfide	0.0263051	1	1	0.220751	1	0.00580686
GO:0018307	enzyme active site formation	0.0263051	1	1	0.220751	1	0.00580686
GO:0019376	galactolipid catabolic process	0.0263051	1	1	0.220751	1	0.00580686
GO:0032023	trypsinogen activation	0.0263051	1	1	0.220751	1	0.00580686
GO:0032793	activation of CREB transcription factor	0.0263051	1	1	0.220751	1	0.00580686
GO:0032863	activation of Rac GTPase	0.0263051	1	1	0.220751	1	0.00580686
GO:0042292	URM1 activating enzyme activity	0.0263051	1	1	0.220751	1	0.00580686
GO:0043045	DNA methylation during embryonic development	0.0263051	1	1	0.220751	1	0.00580686
GO:0043160	acrosomal lumen	0.0263051	1	1	0.220751	1	0.00580686
GO:0043500	muscle plasticity	0.0263051	1	1	0.220751	1	0.00580686
GO:0043501	skeletal muscle plasticity	0.0263051	1	1	0.220751	1	0.00580686
GO:0045714	regulation of low-density lipoprotein receptor biosynthetic process	0.0263051	1	1	0.220751	1	0.00580686
GO:0045715	negative regulation of low-density lipoprotein receptor biosynthetic process	0.0263051	1	1	0.220751	1	0.00580686
GO:0046700	heterocycle catabolic process	0.0263051	1	1	0.220751	1	0.00580686
GO:0051977	lysophospholipid transport	0.0263051	1	1	0.220751	1	0.00580686
GO:0000256	allantoin catabolic process	0.0263051	1	1	0.220751	1	0.00580686
GO:0001761	beta-alanine transporter activity	0.0263051	1	1	0.220751	1	0.00580686
GO:0001762	beta-alanine transport	0.0263051	1	1	0.220751	1	0.00580686
GO:0001821	histamine secretion	0.0263051	1	1	0.220751	1	0.00580686
GO:0030195	negative regulation of blood coagulation	0.0270165	1	2	0.441501	10	0.0580686
GO:0030667	secretory granule membrane	0.0270165	1	2	0.441501	10	0.0580686
GO:0046466	membrane lipid catabolic process	0.0270746	1	3	0.662252	25	0.145172
GO:0005097	Rab GTPase activator activity	0.0301366	1	4	0.883002	45	0.261309
GO:0050873	brown fat cell differentiation	0.0331355	1	3	0.662252	27	0.156785
GO:0005178	integrin binding	0.036408	1	3	0.662252	28	0.162592
GO:0016529	sarcoplasmic reticulum	0.036408	1	3	0.662252	28	0.162592
GO:0005246	calcium channel regulator activity	0.038278	1	2	0.441501	12	0.0696824
GO:0008603	cAMP-dependent protein kinase regulator activity	0.038278	1	2	0.441501	12	0.0696824
GO:0031110	regulation of microtubule polymerization or depolymerization	0.03984	1	3	0.662252	29	0.168399
GO:0051924	regulation of calcium ion transport	0.03984	1	3	0.662252	29	0.168399
GO:0009056	catabolic process	0.0423779	1	38	8.38852	1082	6.28303
GO:0032319	regulation of Rho GTPase activity	0.0444652	1	2	0.441501	13	0.0754892
GO:0043198	dendritic shaft	0.0444652	1	2	0.441501	13	0.0754892
GO:0043499	eukaryotic cell surface binding	0.0444652	1	2	0.441501	13	0.0754892
GO:0005923	tight junction	0.0452562	1	5	1.10375	74	0.429708
GO:0015629	actin cytoskeleton	0.0452562	1	5	1.10375	74	0.429708
GO:0004175	endopeptidase activity	0.0458012	1	17	3.75276	412	2.39243
GO:0008238	exopeptidase activity	0.0474876	1	5	1.10375	75	0.435515
GO:0005261	cation channel activity	0.0494524	1	11	2.42826	237	1.37623

## Sheet: Set8-GO
GO ACCESSION	GO Term	p-value	corrected p-value	Count in Selection	% Count in Selection	Count in Total	% Count in Total
GO:0006952	defense response	4.8751e-09	6.9291e-05	23	10.2679	413	2.39823
GO:0002376	immune system process	2.95741e-08	0.000210172	30	13.3929	737	4.27966
GO:0032501	multicellular organismal process	8.06603e-08	0.000382149	59	26.3393	2263	13.1409
GO:0006955	immune response	2.26273e-07	0.000804019	21	9.375	431	2.50276
GO:0044421	extracellular region part	3.30252e-07	0.00093879	29	12.9464	778	4.51774
GO:0050776	regulation of immune response	1.2395e-06	0.00293621	12	5.35714	160	0.929098
GO:0050778	positive regulation of immune response	1.65356e-06	0.00329615	11	4.91071	136	0.789733
GO:0051239	regulation of multicellular organismal process	1.85525e-06	0.00329615	20	8.92857	450	2.61309
GO:0002682	regulation of immune system process	2.65383e-06	0.00419106	12	5.35714	172	0.998781
GO:0005615	extracellular space	3.05205e-06	0.00428567	20	8.92857	465	2.70019
GO:0002684	positive regulation of immune system process	3.31679e-06	0.00428567	11	4.91071	146	0.847802
GO:0009611	response to wounding	4.97583e-06	0.00589356	14	6.25	249	1.44591
GO:0051240	positive regulation of multicellular organismal process	7.02511e-06	0.00697255	12	5.35714	189	1.0975
GO:0002253	activation of immune response	7.28882e-06	0.00697255	9	4.01786	102	0.5923
GO:0009605	response to external stimulus	8.72139e-06	0.00697255	20	8.92857	499	2.89763
GO:0030203	glycosaminoglycan metabolic process	8.8302e-06	0.00697255	6	2.67857	38	0.220661
GO:0008009	chemokine activity	8.8302e-06	0.00697255	6	2.67857	38	0.220661
GO:0006022	aminoglycan metabolic process	8.8302e-06	0.00697255	6	2.67857	38	0.220661
GO:0042379	chemokine receptor binding	1.03231e-05	0.00772236	6	2.67857	39	0.226468
GO:0042330	taxis	1.25422e-05	0.00848885	9	4.01786	109	0.632948
GO:0006935	chemotaxis	1.25422e-05	0.00848885	9	4.01786	109	0.632948
GO:0050840	extracellular matrix binding	1.52998e-05	0.00988452	5	2.23214	25	0.145172
GO:0030154	cell differentiation	3.04917e-05	0.0177111	30	13.3929	1033	5.99849
GO:0030217	T cell differentiation	3.11524e-05	0.0177111	6	2.67857	47	0.272923
GO:0050900	leukocyte migration	3.11524e-05	0.0177111	6	2.67857	47	0.272923
GO:0005576	extracellular region	3.85424e-05	0.0210697	38	16.9643	1481	8.59996
GO:0019886	antigen processing and presentation of exogenous peptide antigen via MHC class II	4.48593e-05	0.0227713	4	1.78571	16	0.0929098
GO:0002495	antigen processing and presentation of peptide antigen via MHC class II	4.48593e-05	0.0227713	4	1.78571	16	0.0929098
GO:0030595	leukocyte chemotaxis	5.38458e-05	0.0263905	5	2.23214	32	0.18582
GO:0002504	antigen processing and presentation of peptide or polysaccharide antigen via MHC class II	5.80653e-05	0.0275099	4	1.78571	17	0.0987167
GO:0006954	inflammatory response	6.37353e-05	0.0291751	11	4.91071	200	1.16137
GO:0030003	cation homeostasis	7.11892e-05	0.0291751	10	4.46429	168	0.975553
GO:0030272	5-formyltetrahydrofolate cyclo-ligase activity	7.31283e-05	0.0291751	3	1.33929	7	0.040648
GO:0030593	neutrophil chemotaxis	7.38961e-05	0.0291751	4	1.78571	18	0.104524
GO:0007159	leukocyte adhesion	7.38961e-05	0.0291751	4	1.78571	18	0.104524
GO:0045577	regulation of B cell differentiation	7.38961e-05	0.0291751	4	1.78571	18	0.104524
GO:0042110	T cell activation	8.33948e-05	0.0307466	8	3.57143	108	0.627141
GO:0004857	enzyme inhibitor activity	8.4074e-05	0.0307466	12	5.35714	243	1.41107
GO:0005539	glycosaminoglycan binding	8.61244e-05	0.0307466	9	4.01786	139	0.807154
GO:0019838	growth factor binding	8.81623e-05	0.0307466	7	3.125	81	0.470356
GO:0050896	response to stimulus	8.86925e-05	0.0307466	47	20.9821	2070	12.0202
GO:0048518	positive regulation of biological process	9.93643e-05	0.0330768	39	17.4107	1606	9.32582
GO:0006873	cell ion homeostasis	0.000100069	0.0330768	10	4.46429	175	1.0162
GO:0050870	positive regulation of T cell activation	0.00011481	0.0366013	6	2.67857	59	0.342605
GO:0016882	cyclo-ligase activity	0.000115882	0.0366013	3	1.33929	8	0.0464549
GO:0045619	regulation of lymphocyte differentiation	0.000125964	0.038921	5	2.23214	38	0.220661
GO:0030247	polysaccharide binding	0.000132238	0.0399901	9	4.01786	147	0.853609
GO:0007283	spermatogenesis	0.000167552	0.0430406	11	4.91071	223	1.29493
GO:0048232	male gamete generation	0.000167552	0.0430406	11	4.91071	223	1.29493
GO:0019982	interleukin-7 binding	0.000168446	0.0430406	2	0.892857	2	0.0116137
GO:0031952	regulation of protein amino acid autophosphorylation	0.000168446	0.0430406	2	0.892857	2	0.0116137
GO:0031953	negative regulation of protein amino acid autophosphorylation	0.000168446	0.0430406	2	0.892857	2	0.0116137
GO:0002523	leukocyte migration during inflammatory response	0.000168446	0.0430406	2	0.892857	2	0.0116137
GO:0009434	microtubule-based flagellum	0.000169579	0.0430406	4	1.78571	22	0.127751
GO:0045582	positive regulation of T cell differentiation	0.000169579	0.0430406	4	1.78571	22	0.127751
GO:0050852	T cell receptor signaling pathway	0.000169579	0.0430406	4	1.78571	22	0.127751
GO:0045321	leukocyte activation	0.000195611	0.0483749	11	4.91071	227	1.31816
GO:0001871	pattern binding	0.000197403	0.0483749	9	4.01786	155	0.900064
GO:0050801	ion homeostasis	0.000205002	0.0492424	10	4.46429	191	1.10911
GO:0030098	lymphocyte differentiation	0.00021058	0.0492424	7	3.125	93	0.540038
GO:0048869	cellular developmental process	0.000211337	0.0492424	36	16.0714	1490	8.65223
GO:0007626	locomotory behavior	0.000219184	0.0502471	11	4.91071	230	1.33558
GO:0002429	immune response-activating cell surface receptor signaling pathway	0.000229148	0.0516975	5	2.23214	43	0.249695
GO:0045621	positive regulation of lymphocyte differentiation	0.000241362	0.0536022	4	1.78571	24	0.139365
GO:0043066	negative regulation of apoptosis	0.000266564	0.0582884	12	5.35714	275	1.59689
GO:0006874	calcium ion homeostasis	0.000273307	0.0588574	7	3.125	97	0.563266
GO:0002478	antigen processing and presentation of exogenous peptide antigen	0.000284421	0.0603366	4	1.78571	25	0.145172
GO:0001664	G-protein-coupled receptor binding	0.000296702	0.0620163	6	2.67857	70	0.40648
GO:0043069	negative regulation of programmed cell death	0.000304018	0.0626245	12	5.35714	279	1.62011
GO:0002768	immune response-regulating cell surface receptor signaling pathway	0.00031615	0.0641932	5	2.23214	46	0.267116
GO:0048407	platelet-derived growth factor binding	0.000331706	0.0661232	3	1.33929	11	0.0638755
GO:0007276	gametogenesis	0.00033496	0.0661232	12	5.35714	282	1.63754
GO:0002757	immune response-activating signal transduction	0.000350078	0.068161	5	2.23214	47	0.272923
GO:0048002	antigen processing and presentation of peptide antigen	0.00038669	0.074272	5	2.23214	48	0.278729
GO:0043027	caspase inhibitor activity	0.000438038	0.0819204	3	1.33929	12	0.0696824
GO:0046339	diacylglycerol metabolic process	0.000438038	0.0819204	3	1.33929	12	0.0696824
GO:0045580	regulation of T cell differentiation	0.000446503	0.0824191	4	1.78571	28	0.162592
GO:0032831	positive regulation of CD4-positive, CD25-positive, alpha-beta regulatory T cell differentiation	0.000500995	0.0879108	2	0.892857	3	0.0174206
GO:0045591	positive regulation of regulatory T cell differentiation	0.000500995	0.0879108	2	0.892857	3	0.0174206
GO:0045589	regulation of regulatory T cell differentiation	0.000500995	0.0879108	2	0.892857	3	0.0174206
GO:0002361	CD4-positive, CD25-positive, alpha-beta regulatory T cell differentiation	0.000500995	0.0879108	2	0.892857	3	0.0174206
GO:0002764	immune response-regulating signal transduction	0.000513994	0.0890919	5	2.23214	51	0.29615
GO:0001775	cell activation	0.000526813	0.0902136	11	4.91071	255	1.48075
GO:0009396	folic acid and derivative biosynthetic process	0.000563998	0.0935944	3	1.33929	13	0.0754892
GO:0019865	immunoglobulin binding	0.000563998	0.0935944	3	1.33929	13	0.0754892
GO:0051246	regulation of protein metabolic process	0.000566311	0.0935944	15	6.69643	433	2.51437
GO:0019884	antigen processing and presentation of exogenous antigen	0.000585589	0.0956681	4	1.78571	30	0.174206
GO:0045765	regulation of angiogenesis	0.000614837	0.0990159	5	2.23214	53	0.307764
GO:0002252	immune effector process	0.000620013	0.0990159	7	3.125	111	0.644562
GO:0030005	di-, tri-valent inorganic cation homeostasis	0.000655189	0.103471	8	3.57143	146	0.847802
GO:0048878	chemical homeostasis	0.000680734	0.106324	11	4.91071	263	1.52721
GO:0005578	proteinaceous extracellular matrix	0.000747358	0.115461	11	4.91071	266	1.54463
GO:0007157	heterophilic cell adhesion	0.000848116	0.129618	4	1.78571	33	0.191627
GO:0009897	external side of plasma membrane	0.000905671	0.13336	9	4.01786	191	1.10911
GO:0046649	lymphocyte activation	0.000905671	0.13336	9	4.01786	191	1.10911
GO:0042803	protein homodimerization activity	0.000913721	0.13336	10	4.46429	231	1.34139
GO:0050865	regulation of cell activation	0.000928605	0.13336	8	3.57143	154	0.894257
GO:0030317	sperm motility	0.000951485	0.13336	4	1.78571	34	0.197433
GO:0019953	sexual reproduction	0.00096805	0.13336	12	5.35714	318	1.84658
GO:0006875	metal ion homeostasis	0.000968399	0.13336	8	3.57143	155	0.900064
GO:0032429	regulation of phospholipase A2 activity	0.000993387	0.13336	2	0.892857	4	0.0232275
GO:0045066	regulatory T cell differentiation	0.000993387	0.13336	2	0.892857	4	0.0232275
GO:0006110	regulation of glycolysis	0.000993387	0.13336	2	0.892857	4	0.0232275
GO:0045821	positive regulation of glycolysis	0.000993387	0.13336	2	0.892857	4	0.0232275
GO:0019976	interleukin-2 binding	0.000993387	0.13336	2	0.892857	4	0.0232275
GO:0000003	reproduction	0.000994576	0.13336	12	5.35714	319	1.85239
GO:0005542	folic acid binding	0.00107295	0.141205	3	1.33929	16	0.0929098
GO:0030204	chondroitin sulfate metabolic process	0.00107295	0.141205	3	1.33929	16	0.0929098
GO:0031012	extracellular matrix	0.00123555	0.161111	11	4.91071	283	1.64334
GO:0050863	regulation of T cell activation	0.00127371	0.164578	6	2.67857	92	0.534231
GO:0019901	protein kinase binding	0.00142353	0.182279	6	2.67857	94	0.545845
GO:0042802	identical protein binding	0.00145284	0.182913	14	6.25	427	2.47953
GO:0050851	antigen receptor-mediated signaling pathway	0.00145422	0.182913	4	1.78571	38	0.220661
GO:0002521	leukocyte differentiation	0.00156758	0.195442	7	3.125	130	0.754892
GO:0001959	regulation of cytokine and chemokine mediated signaling pathway	0.00164144	0.199404	2	0.892857	5	0.0290343
GO:0019864	IgG binding	0.00164144	0.199404	2	0.892857	5	0.0290343
GO:0002711	positive regulation of T cell mediated immunity	0.00164144	0.199404	2	0.892857	5	0.0290343
GO:0043028	caspase regulator activity	0.00180394	0.214644	3	1.33929	19	0.11033
GO:0006760	folic acid and derivative metabolic process	0.00180394	0.214644	3	1.33929	19	0.11033
GO:0003779	actin binding	0.0018122	0.214644	11	4.91071	297	1.72464
GO:0045121	lipid raft	0.00190811	0.224136	5	2.23214	68	0.394867
GO:0002237	response to molecule of bacterial origin	0.00193538	0.225476	4	1.78571	41	0.238081
GO:0009967	positive regulation of signal transduction	0.00202175	0.231943	8	3.57143	174	1.01039
GO:0006928	cell motility	0.00202353	0.231943	12	5.35714	347	2.01498
GO:0005581	collagen	0.00210205	0.238858	3	1.33929	20	0.116137
GO:0007204	elevation of cytosolic calcium ion concentration	0.00211756	0.238858	4	1.78571	42	0.243888
GO:0042981	regulation of apoptosis	0.00213427	0.238858	17	7.58929	597	3.4667
GO:0042592	homeostatic process	0.00218578	0.242712	15	6.69643	496	2.8802
GO:0019882	antigen processing and presentation	0.00227017	0.250127	6	2.67857	103	0.598107
GO:0046983	protein dimerization activity	0.00235044	0.255114	13	5.80357	401	2.32855
GO:0043154	negative regulation of caspase activity	0.00242903	0.255114	3	1.33929	21	0.121944
GO:0032733	positive regulation of interleukin-10 production	0.00244107	0.255114	2	0.892857	6	0.0348412
GO:0007341	penetration of zona pellucida	0.00244107	0.255114	2	0.892857	6	0.0348412
GO:0042979	ornithine decarboxylase regulator activity	0.00244107	0.255114	2	0.892857	6	0.0348412
GO:0045730	respiratory burst	0.00244107	0.255114	2	0.892857	6	0.0348412
GO:0042159	lipoprotein catabolic process	0.00244107	0.255114	2	0.892857	6	0.0348412
GO:0043067	regulation of programmed cell death	0.00249191	0.255513	17	7.58929	606	3.51896
GO:0006639	acylglycerol metabolic process	0.00251679	0.255513	4	1.78571	44	0.255502
GO:0051480	cytosolic calcium ion homeostasis	0.00251679	0.255513	4	1.78571	44	0.255502
GO:0001568	blood vessel development	0.00251679	0.255513	4	1.78571	44	0.255502
GO:0032502	developmental process	0.00265753	0.267888	56	25	3007	17.4612
GO:0046486	glycerolipid metabolic process	0.00273455	0.269488	4	1.78571	45	0.261309
GO:0019888	protein phosphatase regulator activity	0.00273455	0.269488	4	1.78571	45	0.261309
GO:0006638	neutral lipid metabolic process	0.00273455	0.269488	4	1.78571	45	0.261309
GO:0051251	positive regulation of lymphocyte activation	0.00274924	0.269488	6	2.67857	107	0.621334
GO:0002706	regulation of lymphocyte mediated immunity	0.00296487	0.284733	4	1.78571	46	0.267116
GO:0002703	regulation of leukocyte mediated immunity	0.00296487	0.284733	4	1.78571	46	0.267116
GO:0006662	glycerol ether metabolic process	0.00296487	0.284733	4	1.78571	46	0.267116
GO:0006916	anti-apoptosis	0.00301541	0.287643	6	2.67857	109	0.632948
GO:0050864	regulation of B cell activation	0.00311038	0.294725	5	2.23214	76	0.441322
GO:0043062	extracellular structure organization and biogenesis	0.0031404	0.294779	7	3.125	147	0.853609
GO:0004864	protein phosphatase inhibitor activity	0.00317318	0.294779	3	1.33929	23	0.133558
GO:0016525	negative regulation of angiogenesis	0.00317318	0.294779	3	1.33929	23	0.133558
GO:0007229	integrin-mediated signaling pathway	0.00329183	0.300988	5	2.23214	77	0.447128
GO:0051249	regulation of lymphocyte activation	0.00338456	0.300988	7	3.125	149	0.865223
GO:0050829	defense response to Gram-negative bacterium	0.00338825	0.300988	2	0.892857	7	0.040648
GO:0019800	peptide cross-linking via chondroitin 4-sulfate glycosaminoglycan	0.00338825	0.300988	2	0.892857	7	0.040648
GO:0030212	hyaluronan metabolic process	0.00338825	0.300988	2	0.892857	7	0.040648
GO:0019863	IgE binding	0.00338825	0.300988	2	0.892857	7	0.040648
GO:0032653	regulation of interleukin-10 production	0.00338825	0.300988	2	0.892857	7	0.040648
GO:0019900	kinase binding	0.00345016	0.302106	6	2.67857	112	0.650369
GO:0008201	heparin binding	0.00345016	0.302106	6	2.67857	112	0.650369
GO:0019208	phosphatase regulator activity	0.0034646	0.302106	4	1.78571	48	0.278729
GO:0001936	regulation of endothelial cell proliferation	0.00359201	0.311306	3	1.33929	24	0.139365
GO:0019725	cell homeostasis	0.00362351	0.312133	11	4.91071	325	1.88723
GO:0046982	protein heterodimerization activity	0.00377764	0.323449	7	3.125	152	0.882643
GO:0030246	carbohydrate binding	0.0038824	0.330429	11	4.91071	328	1.90465
GO:0042611	MHC protein complex	0.0040187	0.334678	4	1.78571	50	0.290343
GO:0006958	complement activation, classical pathway	0.0040187	0.334678	4	1.78571	50	0.290343
GO:0019835	cytolysis	0.00404305	0.334678	3	1.33929	25	0.145172
GO:0006275	regulation of DNA replication	0.00404305	0.334678	3	1.33929	25	0.145172
GO:0042221	response to chemical stimulus	0.00405006	0.334678	18	8.03571	690	4.00674
GO:0007610	behavior	0.00430807	0.348627	12	5.35714	381	2.21242
GO:0001817	regulation of cytokine production	0.00431495	0.348627	5	2.23214	82	0.476163
GO:0001944	vasculature development	0.00431697	0.348627	4	1.78571	51	0.29615
GO:0002697	regulation of immune effector process	0.00431697	0.348627	4	1.78571	51	0.29615
GO:0005583	fibrillar collagen	0.00447904	0.355652	2	0.892857	8	0.0464549
GO:0002709	regulation of T cell mediated immunity	0.00447904	0.355652	2	0.892857	8	0.0464549
GO:0046641	positive regulation of alpha-beta T cell proliferation	0.00447904	0.355652	2	0.892857	8	0.0464549
GO:0001782	B cell homeostasis	0.004527	0.357464	3	1.33929	26	0.150978
GO:0007167	enzyme linked receptor protein signaling pathway	0.00475397	0.371367	9	4.01786	244	1.41687
GO:0008092	cytoskeletal protein binding	0.00477019	0.371367	13	5.80357	436	2.53179
GO:0032403	protein complex binding	0.00478146	0.371367	5	2.23214	84	0.487777
GO:0065008	regulation of biological quality	0.00482459	0.37268	15	6.69643	540	3.13571
GO:0019861	flagellum	0.00495758	0.380883	4	1.78571	53	0.307764
GO:0019212	phosphatase inhibitor activity	0.00504455	0.385481	3	1.33929	27	0.156785
GO:0001932	regulation of protein amino acid phosphorylation	0.0052398	0.396141	6	2.67857	122	0.708437
GO:0006521	regulation of amino acid metabolic process	0.0052398	0.396141	6	2.67857	122	0.708437
GO:0008083	growth factor activity	0.00534193	0.399611	7	3.125	162	0.940712
GO:0009986	cell surface	0.00534193	0.399611	7	3.125	162	0.940712
GO:0030888	regulation of B cell proliferation	0.00559631	0.40374	3	1.33929	28	0.162592
GO:0006469	negative regulation of protein kinase activity	0.00565904	0.40374	4	1.78571	55	0.319377
GO:0002819	regulation of adaptive immune response	0.00565904	0.40374	4	1.78571	55	0.319377
GO:0002822	regulation of adaptive immune response (sensu Gnathostomata)	0.00565904	0.40374	4	1.78571	55	0.319377
GO:0042613	MHC class II protein complex	0.00570957	0.40374	2	0.892857	9	0.0522618
GO:0003841	1-acylglycerol-3-phosphate O-acyltransferase activity	0.00570957	0.40374	2	0.892857	9	0.0522618
GO:0030041	actin filament polymerization	0.00570957	0.40374	2	0.892857	9	0.0522618
GO:0030889	negative regulation of B cell proliferation	0.00570957	0.40374	2	0.892857	9	0.0522618
GO:0042989	sequestering of actin monomers	0.00570957	0.40374	2	0.892857	9	0.0522618
GO:0043666	regulation of phosphoprotein phosphatase activity	0.00570957	0.40374	2	0.892857	9	0.0522618
GO:0003796	lysozyme activity	0.00570957	0.40374	2	0.892857	9	0.0522618
GO:0065009	regulation of a molecular function	0.00596594	0.419779	14	6.25	500	2.90343
GO:0007169	transmembrane receptor protein tyrosine kinase signaling pathway	0.00628577	0.440105	7	3.125	167	0.969746
GO:0051248	negative regulation of protein metabolic process	0.00635387	0.442692	6	2.67857	127	0.737472
GO:0006956	complement activation	0.00642378	0.443218	4	1.78571	57	0.330991
GO:0002541	activation of plasma proteins during acute inflammatory response	0.00642378	0.443218	4	1.78571	57	0.330991
GO:0000786	nucleosome	0.00669668	0.459815	5	2.23214	91	0.528425
GO:0005201	extracellular matrix structural constituent	0.0068048	0.462311	3	1.33929	30	0.174206
GO:0017015	regulation of transforming growth factor beta receptor signaling pathway	0.0068048	0.462311	3	1.33929	30	0.174206
GO:0051348	negative regulation of transferase activity	0.00683062	0.462311	4	1.78571	58	0.336798
GO:0045740	positive regulation of DNA replication	0.00707607	0.469972	2	0.892857	10	0.0580686
GO:0001938	positive regulation of endothelial cell proliferation	0.00707607	0.469972	2	0.892857	10	0.0580686
GO:0030837	negative regulation of actin filament polymerization	0.00707607	0.469972	2	0.892857	10	0.0580686
GO:0030511	positive regulation of transforming growth factor beta receptor signaling pathway	0.00707607	0.469972	2	0.892857	10	0.0580686
GO:0048522	positive regulation of cellular process	0.00724032	0.477338	28	12.5	1322	7.67667
GO:0050730	regulation of peptidyl-tyrosine phosphorylation	0.00725415	0.477338	4	1.78571	59	0.342605
GO:0045087	innate immune response	0.00766184	0.501842	5	2.23214	94	0.545845
GO:0051235	maintenance of localization	0.00815669	0.529375	3	1.33929	32	0.18582
GO:0051091	positive regulation of transcription factor activity	0.00815669	0.529375	3	1.33929	32	0.18582
GO:0030198	extracellular matrix organization and biogenesis	0.00835659	0.539884	5	2.23214	96	0.557459
GO:0045579	positive regulation of B cell differentiation	0.00857482	0.547808	2	0.892857	11	0.0638755
GO:0043367	CD4-positive, alpha beta T cell differentiation	0.00857482	0.547808	2	0.892857	11	0.0638755
GO:0050790	regulation of catalytic activity	0.00859487	0.547808	13	5.80357	469	2.72342
GO:0051247	positive regulation of protein metabolic process	0.00877863	0.557022	6	2.67857	136	0.789733
GO:0048519	negative regulation of biological process	0.00938291	0.592719	29	12.9464	1411	8.19348
GO:0008064	regulation of actin polymerization and/or depolymerization	0.00963165	0.604567	4	1.78571	64	0.371639
GO:0006641	triacylglycerol metabolic process	0.00965555	0.604567	3	1.33929	34	0.197433
GO:0007166	cell surface receptor linked signal transduction	0.00971262	0.605474	26	11.6071	1229	7.13664
GO:0030832	regulation of actin filament length	0.0101609	0.614433	4	1.78571	65	0.377446
GO:0048872	homeostasis of number of cells	0.0101609	0.614433	4	1.78571	65	0.377446
GO:0046640	regulation of alpha-beta T cell proliferation	0.0102022	0.614433	2	0.892857	12	0.0696824
GO:0051209	release of sequestered calcium ion into cytosol	0.0102022	0.614433	2	0.892857	12	0.0696824
GO:0045408	regulation of interleukin-6 biosynthetic process	0.0102022	0.614433	2	0.892857	12	0.0696824
GO:0045576	mast cell activation	0.0102022	0.614433	2	0.892857	12	0.0696824
GO:0051282	regulation of sequestering of calcium ion	0.0102022	0.614433	2	0.892857	12	0.0696824
GO:0051283	negative regulation of sequestering of calcium ion	0.0102022	0.614433	2	0.892857	12	0.0696824
GO:0002260	lymphocyte homeostasis	0.0104611	0.622116	3	1.33929	35	0.20324
GO:0002889	regulation of immunoglobulin mediated immune response	0.0104611	0.622116	3	1.33929	35	0.20324
GO:0002712	regulation of B cell mediated immunity	0.0104611	0.622116	3	1.33929	35	0.20324
GO:0009607	response to biotic stimulus	0.0105329	0.623777	9	4.01786	277	1.6085
GO:0006950	response to stress	0.0106641	0.628925	20	8.92857	877	5.09262
GO:0002861	regulation of inflammatory response to antigenic stimulus	0.0113044	0.653276	3	1.33929	36	0.209047
GO:0046635	positive regulation of alpha-beta T cell activation	0.0119546	0.653276	2	0.892857	13	0.0754892
GO:0046463	acylglycerol biosynthetic process	0.0119546	0.653276	2	0.892857	13	0.0754892
GO:0046460	neutral lipid biosynthetic process	0.0119546	0.653276	2	0.892857	13	0.0754892
GO:0043499	eukaryotic cell surface binding	0.0119546	0.653276	2	0.892857	13	0.0754892
GO:0042325	regulation of phosphorylation	0.0121806	0.653276	6	2.67857	146	0.847802
GO:0042102	positive regulation of T cell proliferation	0.0121859	0.653276	3	1.33929	37	0.214854
GO:0006807	nitrogen compound metabolic process	0.0129351	0.653276	11	4.91071	388	2.25306
GO:0008049	male courtship behavior	0.0130074	0.653276	1	0.446429	1	0.00580686
GO:0005018	platelet-derived growth factor alpha-receptor activity	0.0130074	0.653276	1	0.446429	1	0.00580686
GO:0046911	metal chelating activity	0.0130074	0.653276	1	0.446429	1	0.00580686
GO:0042103	positive regulation of T cell homeostatic proliferation	0.0130074	0.653276	1	0.446429	1	0.00580686
GO:0048752	semicircular canal morphogenesis	0.0130074	0.653276	1	0.446429	1	0.00580686
GO:0046340	diacylglycerol catabolic process	0.0130074	0.653276	1	0.446429	1	0.00580686
GO:0001868	regulation of complement activation, lectin pathway	0.0130074	0.653276	1	0.446429	1	0.00580686
GO:0001869	negative regulation of complement activation, lectin pathway	0.0130074	0.653276	1	0.446429	1	0.00580686
GO:0002576	platelet degranulation	0.0130074	0.653276	1	0.446429	1	0.00580686
GO:0035092	sperm chromatin condensation	0.0130074	0.653276	1	0.446429	1	0.00580686
GO:0035026	leading edge cell differentiation	0.0130074	0.653276	1	0.446429	1	0.00580686
GO:0046014	negative regulation of T cell homeostatic proliferation	0.0130074	0.653276	1	0.446429	1	0.00580686
GO:0002548	monocyte chemotaxis	0.0130074	0.653276	1	0.446429	1	0.00580686
GO:0032913	negative regulation of transforming growth factor-beta3 production	0.0130074	0.653276	1	0.446429	1	0.00580686
GO:0004356	glutamate-ammonia ligase activity	0.0130074	0.653276	1	0.446429	1	0.00580686
GO:0016404	15-hydroxyprostaglandin dehydrogenase (NAD+) activity	0.0130074	0.653276	1	0.446429	1	0.00580686
GO:0032910	regulation of transforming growth factor-beta3 production	0.0130074	0.653276	1	0.446429	1	0.00580686
GO:0032805	positive regulation of low-density lipoprotein receptor catabolic process	0.0130074	0.653276	1	0.446429	1	0.00580686
GO:0002069	columnar/cuboidal epithelial cell maturation	0.0130074	0.653276	1	0.446429	1	0.00580686
GO:0032765	positive regulation of mast cytokine production	0.0130074	0.653276	1	0.446429	1	0.00580686
GO:0002923	regulation of humoral immune response mediated by circulating immunoglobulin	0.0130074	0.653276	1	0.446429	1	0.00580686
GO:0030478	actin cap	0.0130074	0.653276	1	0.446429	1	0.00580686
GO:0002071	glandular epithelial cell maturation	0.0130074	0.653276	1	0.446429	1	0.00580686
GO:0002084	protein depalmitoylation	0.0130074	0.653276	1	0.446429	1	0.00580686
GO:0032488	Cdc42 protein signal transduction	0.0130074	0.653276	1	0.446429	1	0.00580686
GO:0008780	acyl-[acyl-carrier-protein]-UDP-N-acetylglucosamine O-acyltransferase activity	0.0130074	0.653276	1	0.446429	1	0.00580686
GO:0008792	arginine decarboxylase activity	0.0130074	0.653276	1	0.446429	1	0.00580686
GO:0005586	collagen type III	0.0130074	0.653276	1	0.446429	1	0.00580686
GO:0051403	stress-activated MAPK cascade	0.0130074	0.653276	1	0.446429	1	0.00580686
GO:0001811	negative regulation of type I hypersensitivity	0.0130074	0.653276	1	0.446429	1	0.00580686
GO:0001512	dihydronicotinamide riboside quinone reductase activity	0.0130074	0.653276	1	0.446429	1	0.00580686
GO:0060005	vestibular reflex	0.0130074	0.653276	1	0.446429	1	0.00580686
GO:0002431	Fc receptor mediated stimulatory signaling pathway	0.0130074	0.653276	1	0.446429	1	0.00580686
GO:0006542	glutamine biosynthetic process	0.0130074	0.653276	1	0.446429	1	0.00580686
GO:0006959	humoral immune response	0.0130892	0.655072	4	1.78571	70	0.40648
GO:0007274	neuromuscular synaptic transmission	0.0138285	0.684131	2	0.892857	14	0.0812961
GO:0045017	glycerolipid biosynthetic process	0.0138285	0.684131	2	0.892857	14	0.0812961
GO:0046504	glycerol ether biosynthetic process	0.0138285	0.684131	2	0.892857	14	0.0812961
GO:0005737	cytoplasm	0.0138624	0.684131	69	30.8036	4166	24.1914
GO:0019220	regulation of phosphate metabolic process	0.0141895	0.695445	6	2.67857	151	0.876836
GO:0051174	regulation of phosphorus metabolic process	0.0141895	0.695445	6	2.67857	151	0.876836
GO:0009893	positive regulation of metabolic process	0.0147307	0.71949	17	7.58929	729	4.2332
GO:0002705	positive regulation of leukocyte mediated immunity	0.0150615	0.730624	3	1.33929	40	0.232275
GO:0002708	positive regulation of lymphocyte mediated immunity	0.0150615	0.730624	3	1.33929	40	0.232275
GO:0007178	transmembrane receptor protein serine/threonine kinase signaling pathway	0.0157828	0.747049	4	1.78571	74	0.429708
GO:0048306	calcium-dependent protein binding	0.0158206	0.747049	2	0.892857	15	0.087103
GO:0008154	actin polymerization and/or depolymerization	0.0158206	0.747049	2	0.892857	15	0.087103
GO:0050830	defense response to Gram-positive bacterium	0.0158206	0.747049	2	0.892857	15	0.087103
GO:0016411	acylglycerol O-acyltransferase activity	0.0158206	0.747049	2	0.892857	15	0.087103
GO:0030641	hydrogen ion homeostasis	0.0158206	0.747049	2	0.892857	15	0.087103
GO:0016998	cell wall catabolic process	0.0158206	0.747049	2	0.892857	15	0.087103
GO:0032755	positive regulation of interleukin-6 production	0.0158206	0.747049	2	0.892857	15	0.087103
GO:0042098	T cell proliferation	0.0160978	0.757622	3	1.33929	41	0.238081
GO:0044459	plasma membrane part	0.0165485	0.776265	28	12.5	1412	8.19929
GO:0051336	regulation of hydrolase activity	0.016704	0.780982	7	3.125	202	1.17299
GO:0005125	cytokine activity	0.0168164	0.78366	8	3.57143	250	1.45172
GO:0001776	leukocyte homeostasis	0.0171732	0.795071	3	1.33929	42	0.243888
GO:0002699	positive regulation of immune effector process	0.0171732	0.795071	3	1.33929	42	0.243888
GO:0007040	lysosome organization and biogenesis	0.0179274	0.827293	2	0.892857	16	0.0929098
GO:0030234	enzyme regulator activity	0.0180429	0.82993	17	7.58929	746	4.33192
GO:0016064	immunoglobulin mediated immune response	0.0194418	0.891391	3	1.33929	44	0.255502
GO:0032944	regulation of mononuclear cell proliferation	0.019608	0.893247	4	1.78571	79	0.458742
GO:0050670	regulation of lymphocyte proliferation	0.019608	0.893247	4	1.78571	79	0.458742
GO:0050789	regulation of biological process	0.0197936	0.898825	74	33.0357	4593	26.6709
GO:0008284	positive regulation of cell proliferation	0.0200741	0.906123	10	4.46429	361	2.09628
GO:0050869	negative regulation of B cell activation	0.0201456	0.906123	2	0.892857	17	0.0987167
GO:0046632	alpha-beta T cell differentiation	0.0201456	0.906123	2	0.892857	17	0.0987167
GO:0002824	positive regulation of adaptive immune response (sensu Gnathostomata)	0.0206352	0.922305	3	1.33929	45	0.261309
GO:0002821	positive regulation of adaptive immune response	0.0206352	0.922305	3	1.33929	45	0.261309
GO:0009308	amine metabolic process	0.0207656	0.925225	10	4.46429	363	2.10789
GO:0050878	regulation of body fluids	0.0212846	0.942439	4	1.78571	81	0.470356
GO:0043086	negative regulation of enzyme activity	0.0212846	0.942439	4	1.78571	81	0.470356
GO:0000323	lytic vacuole	0.0216381	0.952163	7	3.125	213	1.23686
GO:0005764	lysosome	0.0216381	0.952163	7	3.125	213	1.23686
GO:0016043	cellular component organization and biogenesis	0.0224574	0.9642	35	15.625	1906	11.0679
GO:0007033	vacuole organization and biogenesis	0.0224721	0.9642	2	0.892857	18	0.104524
GO:0007076	mitotic chromosome condensation	0.0224721	0.9642	2	0.892857	18	0.104524
GO:0009966	regulation of signal transduction	0.0231365	0.9642	13	5.80357	535	3.10667
GO:0044242	cellular lipid catabolic process	0.0231402	0.9642	3	1.33929	47	0.272923
GO:0030036	actin cytoskeleton organization and biogenesis	0.0236596	0.9642	7	3.125	217	1.26009
GO:0000287	magnesium ion binding	0.024359	0.9642	11	4.91071	427	2.47953
GO:0045807	positive regulation of endocytosis	0.0244519	0.9642	3	1.33929	48	0.278729
GO:0048146	positive regulation of fibroblast proliferation	0.0249037	0.9642	2	0.892857	19	0.11033
GO:0018149	peptide cross-linking	0.0249037	0.9642	2	0.892857	19	0.11033
GO:0045763	negative regulation of amino acid metabolic process	0.0249037	0.9642	2	0.892857	19	0.11033
GO:0001933	negative regulation of protein amino acid phosphorylation	0.0249037	0.9642	2	0.892857	19	0.11033
GO:0046634	regulation of alpha-beta T cell activation	0.0249037	0.9642	2	0.892857	19	0.11033
GO:0032946	positive regulation of mononuclear cell proliferation	0.0258031	0.9642	3	1.33929	49	0.284536
GO:0050671	positive regulation of lymphocyte proliferation	0.0258031	0.9642	3	1.33929	49	0.284536
GO:0007179	transforming growth factor beta receptor signaling pathway	0.0258031	0.9642	3	1.33929	49	0.284536
GO:0001819	positive regulation of cytokine production	0.0258031	0.9642	3	1.33929	49	0.284536
GO:0031232	extrinsic to external side of plasma membrane	0.0258463	0.9642	1	0.446429	2	0.0116137
GO:0002329	pre-B cell differentiation	0.0258463	0.9642	1	0.446429	2	0.0116137
GO:0048154	S100 beta binding	0.0258463	0.9642	1	0.446429	2	0.0116137
GO:0042134	rRNA primary transcript binding	0.0258463	0.9642	1	0.446429	2	0.0116137
GO:0048020	CCR chemokine receptor binding	0.0258463	0.9642	1	0.446429	2	0.0116137
GO:0005017	platelet-derived growth factor receptor activity	0.0258463	0.9642	1	0.446429	2	0.0116137
GO:0009313	oligosaccharide catabolic process	0.0258463	0.9642	1	0.446429	2	0.0116137
GO:0046952	ketone body catabolic process	0.0258463	0.9642	1	0.446429	2	0.0116137
GO:0019767	IgE receptor activity	0.0258463	0.9642	1	0.446429	2	0.0116137
GO:0043370	regulation of CD4-positive, alpha beta T cell differentiation	0.0258463	0.9642	1	0.446429	2	0.0116137
GO:0050855	regulation of B cell receptor signaling pathway	0.0258463	0.9642	1	0.446429	2	0.0116137
GO:0043372	positive regulation of CD4-positive, alpha beta T cell differentiation	0.0258463	0.9642	1	0.446429	2	0.0116137
GO:0045916	negative regulation of complement activation	0.0258463	0.9642	1	0.446429	2	0.0116137
GO:0047756	chondroitin 4-sulfotransferase activity	0.0258463	0.9642	1	0.446429	2	0.0116137
GO:0032743	positive regulation of interleukin-2 production	0.0258463	0.9642	1	0.446429	2	0.0116137
GO:0047749	cholestanetriol 26-monooxygenase activity	0.0258463	0.9642	1	0.446429	2	0.0116137
GO:0051043	regulation of membrane protein ectodomain proteolysis	0.0258463	0.9642	1	0.446429	2	0.0116137
GO:0051044	positive regulation of membrane protein ectodomain proteolysis	0.0258463	0.9642	1	0.446429	2	0.0116137
GO:0045071	negative regulation of viral genome replication	0.0258463	0.9642	1	0.446429	2	0.0116137
GO:0008410	CoA-transferase activity	0.0258463	0.9642	1	0.446429	2	0.0116137
GO:0043568	positive regulation of insulin-like growth factor receptor signaling pathway	0.0258463	0.9642	1	0.446429	2	0.0116137
GO:0004301	epoxide hydrolase activity	0.0258463	0.9642	1	0.446429	2	0.0116137
GO:0030194	positive regulation of blood coagulation	0.0258463	0.9642	1	0.446429	2	0.0116137
GO:0050650	chondroitin sulfate proteoglycan biosynthetic process	0.0258463	0.9642	1	0.446429	2	0.0116137
GO:0042978	ornithine decarboxylase activator activity	0.0258463	0.9642	1	0.446429	2	0.0116137
GO:0008260	3-oxoacid CoA-transferase activity	0.0258463	0.9642	1	0.446429	2	0.0116137
GO:0016211	ammonia ligase activity	0.0258463	0.9642	1	0.446429	2	0.0116137
GO:0006104	succinyl-CoA metabolic process	0.0258463	0.9642	1	0.446429	2	0.0116137
GO:0042629	mast cell granule	0.0258463	0.9642	1	0.446429	2	0.0116137
GO:0007619	courtship behavior	0.0258463	0.9642	1	0.446429	2	0.0116137
GO:0048549	positive regulation of pinocytosis	0.0258463	0.9642	1	0.446429	2	0.0116137
GO:0048548	regulation of pinocytosis	0.0258463	0.9642	1	0.446429	2	0.0116137
GO:0005584	collagen type I	0.0258463	0.9642	1	0.446429	2	0.0116137
GO:0047150	betaine-homocysteine S-methyltransferase activity	0.0258463	0.9642	1	0.446429	2	0.0116137
GO:0002840	regulation of T cell mediated immune response to tumor cell	0.0258463	0.9642	1	0.446429	2	0.0116137
GO:0002842	positive regulation of T cell mediated immune response to tumor cell	0.0258463	0.9642	1	0.446429	2	0.0116137
GO:0046950	ketone body metabolic process	0.0258463	0.9642	1	0.446429	2	0.0116137
GO:0048156	tau protein binding	0.0258463	0.9642	1	0.446429	2	0.0116137
GO:0002327	immature B cell differentiation	0.0258463	0.9642	1	0.446429	2	0.0116137
GO:0031727	CCR2 chemokine receptor binding	0.0258463	0.9642	1	0.446429	2	0.0116137
GO:0006591	ornithine metabolic process	0.0258463	0.9642	1	0.446429	2	0.0116137
GO:0006417	regulation of translation	0.0264262	0.983254	6	2.67857	174	1.01039
GO:0006940	regulation of smooth muscle contraction	0.0274372	1	2	0.892857	20	0.116137
GO:0008373	sialyltransferase activity	0.0274372	1	2	0.892857	20	0.116137
GO:0043498	cell surface binding	0.0274372	1	2	0.892857	20	0.116137
GO:0005102	receptor binding	0.027502	1	16	7.14286	724	4.20417
GO:0048609	reproductive process in a multicellular organism	0.0278303	1	4	1.78571	88	0.511004
GO:0007009	plasma membrane organization and biogenesis	0.0286233	1	3	1.33929	51	0.29615
GO:0005773	vacuole	0.0292745	1	7	3.125	227	1.31816
GO:0031225	anchored to membrane	0.0300074	1	5	2.23214	133	0.772313
GO:0030004	monovalent inorganic cation homeostasis	0.0300696	1	2	0.892857	21	0.121944
GO:0032675	regulation of interleukin-6 production	0.0300696	1	2	0.892857	21	0.121944
GO:0050818	regulation of coagulation	0.0300696	1	2	0.892857	21	0.121944
GO:0051054	positive regulation of DNA metabolic process	0.0300696	1	2	0.892857	21	0.121944
GO:0005515	protein binding	0.0311783	1	105	46.875	6983	40.5493
GO:0045444	fat cell differentiation	0.0316004	1	3	1.33929	53	0.307764
GO:0030029	actin filament-based process	0.031753	1	7	3.125	231	1.34139
GO:0045766	positive regulation of angiogenesis	0.032798	1	2	0.892857	22	0.127751
GO:0051092	activation of NF-kappaB transcription factor	0.032798	1	2	0.892857	22	0.127751
GO:0006595	polyamine metabolic process	0.032798	1	2	0.892857	22	0.127751
GO:0065007	biological regulation	0.0328203	1	77	34.375	4919	28.564
GO:0043235	receptor complex	0.0342975	1	4	1.78571	94	0.545845
GO:0051052	regulation of DNA metabolic process	0.0347333	1	3	1.33929	55	0.319377
GO:0043405	regulation of MAPK activity	0.0354533	1	4	1.78571	95	0.551652
GO:0030199	collagen fibril organization	0.0356194	1	2	0.892857	23	0.133558
GO:0043407	negative regulation of MAPK activity	0.0356194	1	2	0.892857	23	0.133558
GO:0045185	maintenance of protein localization	0.0356194	1	2	0.892857	23	0.133558
GO:0045429	positive regulation of nitric oxide biosynthetic process	0.0356194	1	2	0.892857	23	0.133558
GO:0046631	alpha-beta T cell activation	0.0356194	1	2	0.892857	23	0.133558
GO:0005520	insulin-like growth factor binding	0.0356194	1	2	0.892857	23	0.133558
GO:0048513	organ development	0.0358773	1	17	7.58929	810	4.70356
GO:0019724	B cell mediated immunity	0.0363579	1	3	1.33929	56	0.325184
GO:0009889	regulation of biosynthetic process	0.0371239	1	7	3.125	239	1.38784
GO:0046651	lymphocyte proliferation	0.0380209	1	3	1.33929	57	0.330991
GO:0007529	establishment of synaptic specificity at neuromuscular junction	0.038519	1	1	0.446429	3	0.0174206
GO:0007567	parturition	0.038519	1	1	0.446429	3	0.0174206
GO:0008474	palmitoyl-(protein) hydrolase activity	0.038519	1	1	0.446429	3	0.0174206
GO:0008898	homocysteine S-methyltransferase activity	0.038519	1	1	0.446429	3	0.0174206
GO:0016880	acid-ammonia (or amide) ligase activity	0.038519	1	1	0.446429	3	0.0174206
GO:0019563	glycerol catabolic process	0.038519	1	1	0.446429	3	0.0174206
GO:0030104	water homeostasis	0.038519	1	1	0.446429	3	0.0174206
GO:0030836	positive regulation of actin filament depolymerization	0.038519	1	1	0.446429	3	0.0174206
GO:0031528	microvillus membrane	0.038519	1	1	0.446429	3	0.0174206
GO:0032311	angiogenin-PRI complex	0.038519	1	1	0.446429	3	0.0174206
GO:0032430	positive regulation of phospholipase A2 activity	0.038519	1	1	0.446429	3	0.0174206
GO:0032431	activation of phospholipase A2	0.038519	1	1	0.446429	3	0.0174206
GO:0032763	regulation of mast cytokine production	0.038519	1	1	0.446429	3	0.0174206
GO:0032803	regulation of low-density lipoprotein receptor catabolic process	0.038519	1	1	0.446429	3	0.0174206
GO:0043020	NADPH oxidase complex	0.038519	1	1	0.446429	3	0.0174206
GO:0046013	regulation of T cell homeostatic proliferation	0.038519	1	1	0.446429	3	0.0174206
GO:0046168	glycerol-3-phosphate catabolic process	0.038519	1	1	0.446429	3	0.0174206
GO:0046479	glycosphingolipid catabolic process	0.038519	1	1	0.446429	3	0.0174206
GO:0046661	male sex differentiation	0.038519	1	1	0.446429	3	0.0174206
GO:0046696	lipopolysaccharide receptor complex	0.038519	1	1	0.446429	3	0.0174206
GO:0048488	synaptic vesicle endocytosis	0.038519	1	1	0.446429	3	0.0174206
GO:0050654	chondroitin sulfate proteoglycan metabolic process	0.038519	1	1	0.446429	3	0.0174206
GO:0050996	positive regulation of lipid catabolic process	0.038519	1	1	0.446429	3	0.0174206
GO:0051000	positive regulation of nitric-oxide synthase activity	0.038519	1	1	0.446429	3	0.0174206
GO:0001520	outer dense fiber	0.038519	1	1	0.446429	3	0.0174206
GO:0001803	regulation of type III hypersensitivity	0.038519	1	1	0.446429	3	0.0174206
GO:0001805	positive regulation of type III hypersensitivity	0.038519	1	1	0.446429	3	0.0174206
GO:0001915	negative regulation of T cell mediated cytotoxicity	0.038519	1	1	0.446429	3	0.0174206
GO:0002674	negative regulation of acute inflammatory response	0.038519	1	1	0.446429	3	0.0174206
GO:0002713	negative regulation of B cell mediated immunity	0.038519	1	1	0.446429	3	0.0174206
GO:0002720	positive regulation of cytokine production during immune response	0.038519	1	1	0.446429	3	0.0174206
GO:0002865	negative regulation of acute inflammatory response to antigenic stimulus	0.038519	1	1	0.446429	3	0.0174206
GO:0002884	negative regulation of hypersensitivity	0.038519	1	1	0.446429	3	0.0174206
GO:0002890	negative regulation of immunoglobulin mediated immune response	0.038519	1	1	0.446429	3	0.0174206
GO:0002922	positive regulation of humoral immune response	0.038519	1	1	0.446429	3	0.0174206
GO:0002925	positive regulation of humoral immune response mediated by circulating immunoglobulin	0.038519	1	1	0.446429	3	0.0174206
GO:0003715	transcription termination factor activity	0.038519	1	1	0.446429	3	0.0174206
GO:0003716	RNA polymerase I transcription termination factor activity	0.038519	1	1	0.446429	3	0.0174206
GO:0004367	glycerol-3-phosphate dehydrogenase (NAD+) activity	0.038519	1	1	0.446429	3	0.0174206
GO:0004862	cAMP-dependent protein kinase inhibitor activity	0.038519	1	1	0.446429	3	0.0174206
GO:0006463	steroid hormone receptor complex assembly	0.038519	1	1	0.446429	3	0.0174206
GO:0006689	ganglioside catabolic process	0.038519	1	1	0.446429	3	0.0174206
GO:0006907	pinocytosis	0.038519	1	1	0.446429	3	0.0174206
GO:0016289	CoA hydrolase activity	0.038531	1	2	0.892857	24	0.139365
GO:0042632	cholesterol homeostasis	0.038531	1	2	0.892857	24	0.139365
GO:0046332	SMAD binding	0.038531	1	2	0.892857	24	0.139365
GO:0051050	positive regulation of transport	0.0390548	1	4	1.78571	98	0.569073
GO:0065004	protein-DNA complex assembly	0.0391384	1	5	2.23214	143	0.830381
GO:0032943	mononuclear cell proliferation	0.0397222	1	3	1.33929	58	0.336798
GO:0050871	positive regulation of B cell activation	0.0397222	1	3	1.33929	58	0.336798
GO:0006334	nucleosome assembly	0.0403001	1	4	1.78571	99	0.574879
GO:0007596	blood coagulation	0.0414615	1	3	1.33929	59	0.342605
GO:0050817	coagulation	0.0414615	1	3	1.33929	59	0.342605
GO:0051090	regulation of transcription factor activity	0.0414615	1	3	1.33929	59	0.342605
GO:0019965	interleukin binding	0.0415299	1	2	0.892857	25	0.145172
GO:0016477	cell migration	0.042926	1	8	3.57143	300	1.74206
GO:0006508	proteolysis	0.0430671	1	21	9.375	1081	6.27722
GO:0007599	hemostasis	0.0432387	1	3	1.33929	60	0.348412
GO:0042129	regulation of T cell proliferation	0.0432387	1	3	1.33929	60	0.348412
GO:0008305	integrin complex	0.0446135	1	2	0.892857	26	0.150978
GO:0030261	chromosome condensation	0.0446135	1	2	0.892857	26	0.150978
GO:0030500	regulation of bone mineralization	0.0446135	1	2	0.892857	26	0.150978
GO:0030834	regulation of actin filament depolymerization	0.0446135	1	2	0.892857	26	0.150978
GO:0043123	positive regulation of I-kappaB kinase/NF-kappaB cascade	0.0450535	1	3	1.33929	61	0.354219
GO:0042127	regulation of cell proliferation	0.0478084	1	13	5.80357	595	3.45508
GO:0031326	regulation of cellular biosynthetic process	0.0479134	1	6	2.67857	201	1.16718
GO:0045859	regulation of protein kinase activity	0.0488688	1	6	2.67857	202	1.17299
