# Supplementary material for: A Global Expression Switch Marks Pachytene Initiation during Mouse Male Meiosis
Source: Genes (Basel). 2010 Dec 13;1(3):469–83. doi: 10.3390/genes1030469 (PMC3966219; doi:10.3390/genes1030469)
Supplement: Supplementary File 3 — Supplementary Dataset S3 (XLS, 295 KB) [file genes-01-00469-s003.xls]

## Sheet: Chr X
Probe Set ID	Gene Symbol	Entrez Gene ID	Chromosome location	Spermatogonia	pre-Leptotene	Leptotene/Zygotene	early-Pachytene	mid-Pachytene	late-Pachytene	Diplotene	Round Spermatids
1454216_at	4930408F14Rik	74851	chrX:4915942-4917619 (+) // 97.64 // qA1.1 /// chrX:30478629-30480313 (+) // 97.94 // qA3.1 /// chrX:31573581-31575294 (+) // 98.13 // qA3.1 /// chrX:72049267-72050949 (+) // 97.84 // qA7.3 /// chrX:4527485-4529167 (+) // 97.74 // qA1.1 /// chrX:30822371-30824051 (+) // 97.35 // qA3.1 /// chrX:4158764-4160471 (+) // 97.54 // qA1.1 /// chrX:31059303-31060987 (+) // 97.05 // qA3.1 /// chrX:3828703-…	6.11713	5.2152	6.37353	11.8424	10.6061	6.63928	28.5131	188.275
1426887_at	Nudt11	58242	chrX:5624624-5632228 (+) // 91.39 // qA1.1	135.926	137.672	110.989	10.6354	21.013	6.86449	6.15946	6.25087
1433456_at	AU022751	102991	chrX:5658379-5659181 (-) // 91.01 // qA1.1	69.0349	68.0969	59.0267	28.2032	10.706	9.05985	9.50176	7.87593
1420005_s_at	Bmp15	12155	chrX:5891698-5892256 (-) // 87.18 // qA1.1	6.48439	6.53207	6.23144	10.5262	6.57245	7.16607	6.61449	7.48171
1446615_at	---	---	chrX:6114428-6115071 (+) // 99.07 // qA1.1	5.2709	5.08635	4.00744	4.23598	4.07087	4.14903	4.05276	4.12618
1457465_at	Shroom4	208431	chrX:6213766-6214566 (+) // 100.0 // qA1.1	99.8484	130.175	145.846	52.4958	46.6776	12.3248	10.4278	13.9528
1442865_at	Dgkk	331374	chrX:6524535-6525489 (+) // 99.9 // qA1.1	37.4764	25.6068	32.21	7.8385	16.4023	9.20341	6.13143	4.59102
1427744_at	Ccnb3	209091	chrX:6556818-6572696 (-) // 93.52 // qA1.1	22.1563	37.8665	34.9809	28.3968	6.46887	5.0984	5.31811	5.91542
1451661_at	Akap4	11643	chrX:6644644-6655730 (+) // 99.51 // qA1.1	5536.47	743.038	633.44	1116.63	1062.96	240.026	663.815	3614.54
1451662_x_at	Akap4	11643	chrX:6644644-6655730 (+) // 99.51 // qA1.1	9674.98	1252.03	1047.48	2085.79	1898.86	397.11	1101.78	6131.57
1431868_at	---	---	chrX:6645338-6653860 (+) // 67.06 // qA1.1	8.03418	8.76181	15.319	49.4751	175.122	760.516	438.3	208.133
1419019_a_at	Akap4	11643	chrX:6645338-6655732 (+) // 99.58 // qA1.1	8276.77	1313.26	1225.34	1759.73	2141.67	475.716	1218.77	5598.33
1420295_x_at	Clcn5	12728	chrX:6730935-6731117 (-) // 94.12 // qA1.1	38.2024	42.8994	29.9034	24.4306	20.5781	22.5773	21.22	22.1961
1420296_at	Clcn5	12728	chrX:6730935-6731117 (+) // 94.12 // qA1.1	8.56035	12.6145	6.7302	7.51915	7.90754	7.32614	7.07981	7.49391
1429400_at	Clcn5	12728	chrX:6730935-6732946 (-) // 89.0 // qA1.1	211.387	282.584	150.064	82.3387	53.329	13.7551	11.9669	19.9232
1450787_at	Clcn5 /// LOC100045272	100045272 /// 12728	chrX:6736600-6765840 (-) // 99.82 // qA1.1	15.0294	21.7325	11.6537	7.25782	5.27748	4.8071	4.6193	5.35607
1436004_at	Usp27x	54651	chrX:6949716-6950372 (-) // 93.0 // qA1.1	107.776	160.713	168.621	23.4078	36.9176	10.6073	11.4902	8.1593
1427606_at	Usp27x	54651	chrX:6950444-6952293 (-) // 99.67 // qA1.1	6.33209	6.06809	5.94357	6.4691	5.91412	6.14937	5.84178	6.21864
1420734_at	Ppp1r3f	54646	chrX:7135710-7151321 (-) // 95.97 // qA1.1	83.6421	80.581	68.6446	73.8119	58.0968	34.5019	50.4513	73.7454
1430639_at	4930524L23Rik	78185	chrX:7150944-7155541 (+) // 96.22 // qA1.1	15.6038	10.1958	10.4941	8.35595	9.9203	9.90208	9.55304	21.7349
1418347_at	Ccdc22	54638	chrX:7170935-7182519 (-) // 98.24 // qA1.1	416.791	466.562	339.876	268.293	100.153	24.713	10.2491	7.71112
1448280_at	Syp	20977	chrX:7215786-7230379 (+) // 96.38 // qA1.1	20.0568	17.6531	14.1815	14.1138	13.1736	12.4985	13.1682	12.9162
1456247_x_at	Plp2	18824	chrX:7245070-7245300 (-) // 74.35 // qA1.1	8.53178	8.35083	8.279	9.42314	7.99847	8.6898	7.93054	8.56937
1453572_a_at	Plp2	18824	chrX:7245083-7248498 (-) // 99.34 // qA1.1	468.288	395.797	237.134	100.398	48.5287	6.06449	9.17101	10.031
1458023_at	Gpkow	209416	chrX:7274416-7275158 (+) // 89.38 // qA1.1	23.5867	35.5595	15.7203	21.9897	8.47263	8.22877	8.63436	9.02001
1434344_at	Gpkow	209416	chrX:7286096-7286665 (+) // 40.59 // qA1.1	1741.56	2036.17	1360.67	534.133	277.859	50.4852	71.3118	219.471
1424786_s_at	Wdr45	54636	chrX:7299351-7305326 (+) // 97.08 // qA1.1	139.84	169.596	150.368	27.3149	31.4331	9.9406	8.20971	8.20526
1451754_a_at	Wdr45	54636	chrX:7299375-7305308 (+) // 99.14 // qA1.1	68.5372	76.426	65.5956	42.5131	38.6613	41.764	38.5966	39.1149
1428066_at	Ccdc120	54648	chrX:7308830-7311104 (-) // 99.08 // qA1.1	61.6873	76.1429	75.9286	23.1713	18.1519	6.65151	6.99915	6.48276
1434318_a_at	Tcfe3	209446	chrX:7343857-7352326 (+) // 98.2 // qA1.1	165.344	167.485	154.664	44.6	75.6519	6.94686	9.61531	20.8847
1417315_at	Gripap1	54645	chrX:7366890-7397692 (+) // 65.81 // qA1.1	44.2941	38.298	49.7368	36.956	22.9996	7.42311	16.5821	55.0135
1455514_at	Kcnd1	16506	chrX:7413593-7414823 (+) // 98.31 // qA1.1	4.58737	5.8838	4.7905	4.70188	4.85122	4.61763	4.59667	4.79292
1453865_a_at	Otud5	54644	chrX:7419207-7451980 (+) // 99.72 // qA1.1	345.597	387.535	378.255	210.54	142.579	9.59594	17.3827	65.796
1436262_x_at	LOC100045117 /// Otud5	100045117 /// 54644	chrX:7451705-7452436 (+) // 89.16 // qA1.1	33.8501	47.1692	46.2124	26.9808	13.6299	11.1561	10.1615	12.0183
1438985_x_at	Otud5	54644	chrX:7452174-7452415 (+) // 84.62 // qA1.1	6.21015	7.47141	7.37074	7.04239	6.22791	6.53256	6.15967	6.45722
1435573_at	Otud5	54644	chrX:7452396-7453747 (+) // 96.29 // qA1.1	6.1337	5.2415	5.23404	5.60835	5.07404	5.1628	4.95147	5.09558
1453858_at	Slc35a2	22232	chrX:7461176-7463298 (+) // 95.45 // qA1.1	13.8871	26.5067	10.5901	8.93918	8.50425	8.46956	7.8052	8.31472
1439433_a_at	Slc35a2	22232	chrX:7470864-7471152 (+) // 98.63 // qA1.1	73.1347	41.1653	29.3709	49.6517	21.2515	9.61232	18.9014	70.0665
1457024_x_at	Slc35a2	22232	chrX:7471244-7471590 (+) // 96.7 // qA1.1	21.0041	24.3852	42.373	49.443	10.4395	8.57696	14.5504	41.9008
1456086_x_at	LOC631302 /// Pqbp1	54633 /// 631302	chrX:7471645-7471874 (-) // 75.5 // qA1.1	680.631	880.643	750.257	240.146	240.189	42.5997	15.4874	17.7308
1417731_at	Pqbp1	54633	chrX:7471645-7476034 (-) // 95.42 // qA1.1	412.615	542.539	472.161	203.107	167.803	51.8065	21.1029	23.3615
1460685_at	Timm17b	21855	chrX:7476492-7483993 (+) // 90.77 // qA1.1	680.03	691.651	566.094	477.407	128.627	23.5914	12.3684	130.609
1438656_x_at	Timm17b	21855	chrX:7483789-7483993 (+) // 57.94 // qA1.1	2125.02	2517.21	1718.37	1553.58	269.298	92.2713	66.9425	336.857
1416965_at	Pcsk1n	30052	chrX:7496947-7500941 (+) // 98.39 // qA1.1	170.204	249.283	203.255	186.804	51.9405	24.6962	14.9502	11.0538
1456511_x_at	Eras	353283	chrX:7500877-7501689 (-) // 94.86 // qA1.1	51.1865	62.5773	37.0613	15.3234	11.3321	11.2927	10.5825	10.6122
1448928_at	Hdac6	15185	chrX:7507251-7524979 (-) // 99.16 // qA1.1	6676.4	8120.89	8803.72	4205.77	2928.67	391.711	169.884	107.488
1458968_at	C80283	97600	chrX:7519865-7520482 (-) // 97.94 // qA1.1	12.5847	23.3182	15.0499	8.15656	8.67106	8.06622	7.62777	8.8264
1449232_at	Gata1	14460	chrX:7536387-7544982 (-) // 98.98 // qA1.1	5.47435	5.45106	6.14222	5.42838	5.98895	5.29563	5.69178	5.3236
1427382_a_at	Suv39h1	20937	chrX:7638785-7651541 (-) // 87.48 // qA1.1	1220.07	1229.7	1218.77	569.455	420.776	87.5127	36.1507	70.7846
1432236_a_at	Suv39h1	20937	chrX:7647554-7651540 (-) // 99.66 // qA1.1	7.30074	7.30639	8.6726	6.17819	5.95803	6.17284	5.82563	6.08846
1419631_at	Was	22376	chrX:7658734-7667578 (-) // 92.41 // qA1.1	6.28386	4.20699	4.04031	4.30568	4.14624	4.27127	4.16385	4.24981
1419894_at	EG627782	627782	chrX:7678559-7683367 (-) // 100.0 // qA1.1	15.4447	17.3107	13.5184	11.8834	17.5944	18.0366	9.33437	11.7515
1449657_at	EG627782	627782	chrX:7678559-7683367 (+) // 100.0 // qA1.1	7.59672	7.29654	8.86654	8.16225	7.49003	10.242	7.43078	9.80295
1425490_a_at	Wdr13	73447	chrX:7700426-7709678 (-) // 91.55 // qA1.1	62.1831	13.7656	14.2283	17.2403	16.149	16.9343	18.9472	75.7373
1451728_at	Wdr13	73447	chrX:7700426-7709678 (-) // 91.55 // qA1.1	38.297	19.048	19.3628	13.5828	13.485	13.4973	12.7753	34.2572
1429169_at	Rbm3	19652	chrX:7716139-7720044 (-) // 89.89 // qA1.1	6.32871	6.9048	6.46237	6.30736	5.49977	5.72218	5.40262	5.73017
1457394_at	2900002K06Rik	70226	chrX:7722671-7725090 (+) // 65.1 // qA1.1	6.48712	5.38859	7.5995	5.8636	5.35155	5.59059	5.24862	5.49065
1456113_at	Tbc1d25	209815	chrX:7731531-7732455 (-) // 99.68 // qA1.1	103.986	125.09	104.52	50.3335	57.9918	22.9665	24.8859	78.8158
1416667_at	Ebp	13595	chrX:7762450-7770638 (-) // 98.37 // qA1.1	70.1083	41.8767	61.2382	25.3888	37.4152	6.78317	29.2998	34.5018
1424220_a_at	Porcn	53627	chrX:7770973-7783630 (-) // 97.71 // qA1.1	20.3621	19.3543	23.2219	14.2275	13.2059	5.31815	13.2037	12.0993
1438753_at	---	---	chrX:7779465-7780137 (-) // 81.36 // qA1.1	5.34437	5.42451	5.38577	5.53712	5.49814	6.31562	6.39939	7.39527
1417099_at	Ftsj1 /// LOC100044636	100044636 /// 54632	chrX:7817641-7829436 (-) // 88.11 // qA1.1	358.332	387.469	358.114	195.781	158.17	30.54	17.9082	18.4366
1449912_at	LOC100044599 /// Ssxb1 /// Ssxb11	100044599 /// 387588 /// 67985	chrX:7990430-7999284 (+) // 99.89 // qA1.1 /// chrX:7904550-7913361 (+) // 97.83 // qA1.1 /// chrX:7944104-8182243 (+) // 97.49 // qA1.1 /// chrX:8213660-8386571 (+) // 88.48 // qA1.1 /// chrX:8217269-8331771 (+) // 59.64 // qA1.1 /// chrX:8031470-8168942 (-) // 97.83 // qA1.1 /// chrX:8119147-8270574 (-) // 96.58 // qA1.1	69.4314	46.451	110.361	235.003	196.947	110.51	194.808	1094.39
1419540_at	EG434726 /// Fthl17 /// OTTMUSG00000016862 /// OTTMUSG00000016933	434726 /// 434727 /// 434728 /// 83457	chrX:8610618-8611454 (+) // 94.95 // qA1.1 /// chrX:8620706-8621531 (+) // 94.38 // qA1.1 /// chrX:8640155-8640982 (+) // 92.43 // qA1.1 /// chrX:8657035-8657863 (+) // 92.2 // qA1.1 /// chrX:8552821-8553685 (-) // 98.85 // qA1.1 /// chrX:8539237-8540101 (-) // 98.17 // qA1.1 /// chrX:8563003-8563866 (-) // 98.05 // qA1.1	2145.09	1471.43	1305.76	712.975	424.394	104.922	44.5595	14.1172
1453884_at	4930402K13Rik	75775	chrX:8681687-8683468 (+) // 99.83 // qA1.1	12.5695	9.7247	9.16174	12.4533	10.2208	11.5834	22.4829	181.636
1453866_a_at	Xk	22439	chrX:8849882-8887039 (+) // 99.54 // qA1.1	28.1729	19.2941	19.0423	19.8758	12.4847	11.589	12.59	123.654
1419187_at	1700012L04Rik /// OTTMUSG00000016779 /// OTTMUSG00000016790 /// OTTMUSG00000016887	100042927 /// 547154 /// 547160 /// 76383	chrX:8860887-8861420 (+) // 92.36 // qA1.1 /// chrX:8927724-8928257 (+) // 92.36 // qA1.1 /// chrX:13788237-13788785 (+) // 94.27 // qA1.1 /// chrX:10879517-10880053 (+) // 92.36 // qA1.1 /// chrX:10889019-10889555 (+) // 92.36 // qA1.1 /// chrX:10885852-10886388 (+) // 92.01 // qA1.1 /// chrX:10895353-10895889 (+) // 92.01 // qA1.1 /// chrX:10898520-10899056 (+) // 92.01 // qA1.1 /// chrX:109016…	1392.8	104.043	243.534	646.171	439.624	153.154	388	2220.11
1436778_at	Cybb	13058	chrX:9012379-9015380 (-) // 96.86 // qA1.1	92.4721	24.7356	4.56634	13.1373	4.71861	4.93295	4.67172	4.83139
1436779_at	Cybb	13058	chrX:9012379-9015380 (-) // 96.86 // qA1.1	29.6092	5.61123	3.55504	3.75098	3.62979	3.72361	3.61307	3.702
1420614_at	Dynlt3	67117	chrX:9231392-9240085 (-) // 97.98 // qA1.1	101.006	71.8	41.8324	39.654	14.2864	7.06549	5.75195	15.5142
1449928_at	Dynlt3	67117	chrX:9231392-9240085 (-) // 97.98 // qA1.1	177.68	108.717	116.59	215.753	92.3242	20.8812	105.033	598.067
1449929_at	Dynlt3	67117	chrX:9231392-9240085 (-) // 97.98 // qA1.1	273.389	204.998	180.171	70.3849	74.8496	23.899	20.0921	24.8388
1459854_s_at	Dynlt3	67117	chrX:9231394-9231630 (-) // 94.07 // qA1.1	337.044	208.242	229.709	48.099	98.3313	19.9876	41.247	38.9394
1420424_at	1700054O13Rik	67334	chrX:9424072-9424627 (+) // 100.0 // qA1.1	5259.31	398.108	378.54	1410.23	730.161	169.24	460.949	2434.37
1431673_at	4930557A04Rik	385317	chrX:9426828-9427380 (+) // 99.64 // qA1.1	558.904	35.8337	96.9809	215.356	139.414	46.9818	145.896	981.14
1427467_a_at	Rpgr /// Srpx	19893 /// 51795	chrX:9735349-9794046 (-) // 99.37 // qA1.1	346.96	309.689	225.195	101.212	53.2845	24.2703	44.6876	278.963
1420525_a_at	Otc	18416	chrX:9829558-9897405 (+) // 97.82 // qA1.1	5.22098	5.18389	5.08759	5.96752	5.22919	5.50226	5.17917	5.56791
1448737_at	Tspan7	21912	chrX:10062257-10173728 (+) // 98.05 // qA1.1	57.1868	71.7621	54.2586	16.0938	13.5107	10.0817	15.8683	12.8083
1454778_x_at	ENSMUSG00000072940 /// Rps28	100043527 /// 54127	chrX:10062317-10161221 (+) // 44.25 // qA1.1	26695.4	26199.9	24085.9	26006	21704	18511	14170.5	12608.7
1416840_at	Mid1ip1	68041	chrX:10294608-10296823 (+) // 96.61 // qA1.1	61.7184	46.4016	68.2965	40.8072	43.2882	11.9146	25.6495	33.3369
1429438_at	Bcor	71458	chrX:11613866-11618775 (-) // 98.24 // qA1.1	11.8756	16.6884	19.3749	13.1043	16.2464	12.6555	11.808	12.387
1428773_s_at	Bcor	71458	chrX:11614451-11626269 (-) // 97.55 // qA1.1	47.524	43.1225	50.3588	23.4331	23.8798	20.2236	16.8771	21.0474
1452910_at	Bcor	71458	chrX:11614451-11626269 (-) // 97.55 // qA1.1	13.0884	12.3908	11.1623	19.3863	11.8727	12.6045	11.8262	13.6492
1423662_at	Atp6ap2	70495	chrX:12164876-12194175 (+) // 98.87 // qA1.1	1638.44	1576.92	1321.57	830.059	277.479	56.3135	46.1601	65.8398
1439456_x_at	Atp6ap2	70495	chrX:12193613-12193866 (+) // 95.47 // qA1.1	2275.88	2507.76	1840.6	1662.33	490.209	133.008	112.501	227.51
1437688_x_at	Atp6ap2	70495	chrX:12193642-12193881 (+) // 74.6 // qA1.1	4014.89	4235.89	3515.39	2445.06	848.972	231.15	175.848	323.288
1433867_at	1810030O07Rik	69155	chrX:12232009-12232402 (-) // 49.43 // qA1.1	156.459	129.39	114.021	31.3188	58.492	16.5613	34.23	17.351
1429198_at	1810030O07Rik	69155	chrX:12233221-12250702 (-) // 99.28 // qA1.1	74.8856	79.3359	60.1179	15.4264	38.187	13.4479	13.8379	29.1908
1437632_at	Med14	26896	chrX:12252446-12254152 (-) // 100.0 // qA1.1	56.6194	39.0696	41.1013	18.0914	23.0726	17.0571	16.894	23.3933
1457167_at	Med14	26896	chrX:12320066-12320504 (-) // 51.73 // qA1.1	4.65034	6.63891	6.34152	5.02296	4.65739	4.77701	4.60128	4.71286
1450229_at	Med14	26896	chrX:12320531-12339097 (-) // 87.83 // qA1.1	10.051	7.7452	11.079	6.47206	6.24235	6.15742	4.95914	6.05932
1420922_at	Usp9x	22284	chrX:12648768-12749154 (+) // 98.53 // qA1.1	120.269	115.338	142.515	28.8232	45.1582	13.314	13.8533	13.4651
1450039_at	Usp9x	22284	chrX:12648768-12749154 (+) // 98.53 // qA1.1	533.883	542.889	499.55	223.404	292.599	61.4098	61.1917	347.211
1428193_at	Usp9x	22284	chrX:12748780-12750454 (+) // 95.97 // qA1.1 /// chrX:12768971-12770645 (+) // 95.97 // qA1.1 /// chrX:12758876-12760549 (+) // 95.91 // qA1.1	12.2898	12.0081	12.2626	13.0875	7.71551	8.68861	8.34871	8.33215
1428194_at	Usp9x	22284	chrX:12748780-12750454 (+) // 95.97 // qA1.1 /// chrX:12768971-12770645 (+) // 95.97 // qA1.1 /// chrX:12758876-12760549 (+) // 95.91 // qA1.1	17.6439	16.0097	20.7607	8.42094	9.6811	8.02633	7.18608	7.57749
1449323_a_at	Rpl3	27367	chrX:12779688-12780958 (+) // 79.23 // qA1.1 /// chrX:71415982-71417286 (+) // 79.49 // qA7.3 /// chr13:116318695-116319985 (-) // 77.85 // qD2.2 /// chr3:92066124-92067407 (-) // 77.6 // qF1 /// chr3:92031322-92032605 (-) // 77.54 // qF1 /// chr4:112627612-112628903 (-) // 78.61 // qD1 /// chr6:87714930-87716207 (-) // 78.73 // qD1 /// chr15:79908223-79913763 (-) // 88.77 // qE1	17237.4	18945.8	18354.6	14350.3	12361.7	6493.7	5363.64	4543.7
1416467_at	Ddx3x	13205	chrX:12858147-12870179 (+) // 97.94 // qA1.1	298.887	161.422	328.665	36.9282	203.171	42.6927	15.6248	43.7621
1446344_at	Nyx	236690	chrX:13065780-13066445 (+) // 97.02 // qA1.1	7.05609	5.83132	6.68652	6.23355	5.81036	5.78794	5.45256	5.74285
1422518_at	Cask	12361	chrX:13098096-13423682 (-) // 99.13 // qA1.1	48.6657	62.5822	39.7514	30.6957	9.88709	4.34553	5.27763	4.71783
1422519_at	Cask	12361	chrX:13098096-13423682 (-) // 99.13 // qA1.1	78.703	60.8387	42.9218	6.05122	6.52014	5.08827	4.06341	4.88115
1427692_a_at	Cask	12361	chrX:13131709-13423682 (-) // 99.36 // qA1.1	23.1422	25.6723	11.5405	9.71396	6.89316	7.96018	6.68359	7.56707
1445152_at	---	---	chrX:13282561-13282914 (-) // 47.32 // qA1.1	5.42831	5.79697	4.73031	4.9151	4.76746	4.88188	4.77192	4.90435
1419541_at	4930403L05Rik	67395	chrX:14687711-14689038 (-) // 100.0 // qA1.1	172.039	23.1549	26.8009	41.0512	50.5102	33.1085	68.5896	369.321
1419143_at	Cypt6 /// Cypt7 /// Cypt8 /// LOC100044311	100044311 /// 664723 /// 664725 /// 66742	chrX:16099994-16100817 (+) // 99.71 // qA1.2	808.338	54.5154	204.334	828.641	499.585	143.788	565.122	2569.5
1428667_at	Maoa	17161	chrX:16196827-16262870 (+) // 99.76 // qA1.2	143.457	154.761	153.59	133.893	41.1249	31.3626	31.8375	193.2
1442676_at	Maoa	17161	chrX:16262773-16263384 (+) // 99.35 // qA1.2	5.51724	6.8638	7.20905	5.88796	5.51944	5.66045	5.59616	6.42538
1428638_at	Efhc2	74405	chrX:16709174-16896494 (-) // 99.77 // qA1.2	203.106	205.451	199.75	231.477	127.77	25.1237	107.54	788.29
1459861_s_at	Kdm2b /// OTTMUSG00000006609	100039668 /// 30841	chrX:16777074-16777286 (+) // 88.5 // qA1.2	1289.79	1269.9	1576.02	736.536	1581.83	1840.05	1816.08	1707.74
1424215_at	Fundc1	72018	chrX:17133689-17149423 (-) // 98.74 // qA1.2	14.3659	7.22167	8.41782	6.50937	6.26991	6.46312	6.12924	6.40967
1453369_a_at	Fundc1	72018	chrX:17134649-17148767 (-) // 99.9 // qA1.2	202.109	130.455	92.7933	64.9852	24.2614	19.8836	18.139	19.5886
1432469_at	Dusp21	73547	chrX:17722982-17723822 (+) // 99.88 // qA1.2	6.21004	5.24664	7.95497	24.4279	10.5448	6.43881	24.1384	208.855
1427672_a_at	Kdm6a	22289	chrX:17740544-17855992 (+) // 99.95 // qA1.2	179.402	185.943	80.3045	38.5774	14.8754	6.90812	6.85668	10.2191
1446278_at	---	---	chrX:17804913-17805592 (+) // 100.0 // qA1.3	6.58689	13.2871	5.99301	6.35493	6.2123	6.41035	6.00466	6.26342
1446234_at	---	---	chrX:17805383-17806066 (+) // 82.75 // qA1.3	15.6677	35.4149	10.4125	8.38169	7.26612	7.80916	7.27669	7.71666
1427235_at	Kdm6a	22289	chrX:17818825-17856644 (+) // 98.54 // qA1.3	255.374	221.957	131.014	49.0626	14.0837	8.82145	6.75422	7.80898
1445198_at	Kdm6a	22289	chrX:17854669-17855386 (+) // 95.95 // qA1.3	7.09034	7.50885	7.11067	7.90183	7.16766	7.53512	7.22468	7.79679
1449402_at	Chst7	60322	chrX:19636671-19674647 (+) // 97.63 // qA1.3	5.37937	11.7498	5.7289	5.47496	5.32489	5.41158	5.20466	5.52127
1437421_at	---	---	chrX:19678581-19680029 (-) // 99.93 // qA1.3	8.01343	8.52755	7.20146	7.53266	6.72946	7.37107	6.72069	7.24317
1419585_at	Rp2h	19889	chrX:19941700-19976461 (+) // 99.5 // qA1.3	328.87	105.846	166.592	44.9204	54.8735	22.8368	58.7955	305.537
1419586_at	Rp2h	19889	chrX:19941700-19976461 (+) // 99.5 // qA1.3	12.895	11.9397	10.7964	18.447	11.9377	13.0784	11.9092	15.0061
1419587_s_at	Rp2h	19889	chrX:19941700-19976461 (+) // 99.5 // qA1.3	11.958	8.85443	8.59077	10.4033	8.80191	9.45872	8.83811	10.5736
1434061_at	Rp2h	19889	chrX:19976041-19977980 (+) // 95.45 // qA1.3	30.2846	17.1347	11.0689	7.60885	8.42521	9.60963	6.09361	8.64302
1454816_at	Rp2h	19889	chrX:19976041-19977980 (+) // 95.45 // qA1.3	17.9219	14.4664	13.5328	19.4838	14.3123	14.6401	15.0725	21.4611
1455185_s_at	Phf16	382207	chrX:20095158-20097063 (+) // 99.74 // qA1.3	1517.92	1769.36	1652.52	474.38	207.88	90.2437	39.9427	48.2443
1423740_a_at	Rbm10	236732	chrX:20195050-20228015 (+) // 96.78 // qA1.3	737.444	885.31	989.613	612.639	443.437	152.573	126.083	769.186
1423741_at	Rbm10	236732	chrX:20195050-20228015 (+) // 96.78 // qA1.3	156.613	160.908	204.233	95.2903	141.406	43.2	23.4157	160.728
1423742_at	Rbm10	236732	chrX:20195050-20228015 (+) // 96.78 // qA1.3	23.0043	34.8048	32.5101	12.8657	13.0002	9.41991	8.38291	15.4089
1448116_at	Uba1	22201	chrX:20235553-20260127 (+) // 94.63 // qA1.3	2859.19	2915.67	2645.03	1293.36	894.605	134.517	115.313	305.227
1415956_a_at	Pctk1	18555	chrX:20265097-20276999 (+) // 97.36 // qA1.3	836.393	553.086	589.452	220.656	183.948	33.918	57.8922	241.707
1460169_a_at	Pctk1	18555	chrX:20265097-20276999 (+) // 97.36 // qA1.3	269.669	279.46	235.738	154.375	99.4088	31.074	51.8286	57.3918
1438625_s_at	Pctk1	18555	chrX:20276771-20277003 (+) // 61.73 // qA1.3	1915.12	2471.3	1861.45	1079.48	519.861	153.517	103.407	225.926
1426539_at	Usp11	236733	chrX:20281053-20297529 (+) // 94.38 // qA1.3	112.481	113.508	48.2752	42.3633	21.054	6.76948	9.41151	54.9095
1426602_at	Araf	11836	chrX:20425668-20437645 (+) // 97.76 // qA1.3	82.8665	61.3882	56.5714	25.5523	23.4028	14.5269	15.2489	16.6709
1428607_at	Araf	11836	chrX:20425684-20430017 (+) // 88.89 // qA1.3	25.633	23.3423	24.7834	20.796	14.5515	17.9538	16.1426	18.6913
1435566_s_at	Araf	11836	chrX:20428615-20430017 (+) // 97.98 // qA1.3	33.2681	28.7662	39.2996	10.0675	11.9335	11.7841	11.0064	9.69313
1445693_at	Araf	11836	chrX:20431205-20431688 (+) // 98.82 // qA1.3	9.81803	5.93133	6.76345	6.44547	5.94249	6.2109	5.84368	6.20195
1460227_at	Timp1	21857	chrX:20447389-20451859 (+) // 96.91 // qA1.3	5.90461	5.48476	4.29315	4.56627	4.39633	4.56549	4.39237	4.76473
1447537_at	1500032P08Rik	69025	chrX:20509038-20509301 (-) // 78.21 // qA1.3	124.278	130.701	95.3715	30.1359	32.8923	12.7498	10.4072	18.8381
1421896_at	Elk1	13712	chrX:20511274-20527723 (-) // 90.55 // qA1.3	6.61561	5.71366	5.96578	5.80967	5.64456	5.76916	5.71985	5.84698
1421897_at	Elk1	13712	chrX:20511274-20527723 (-) // 90.55 // qA1.3	17.555	20.8533	19.9591	13.7489	10.7224	12.4373	10.6114	11.3431
1445380_at	A230072C01Rik	320742	chrX:20563212-20563863 (+) // 99.39 // qA1.3	5.25105	4.73785	4.65471	5.38804	4.74771	4.87125	5.32192	4.84612
1456504_at	Zfp182	319535	chrX:20605719-20606809 (-) // 71.77 // qA1.3	12.8525	15.9459	10.4145	11.8842	9.53838	10.2224	9.5166	10.924
1431955_at	4930453H23Rik	74683	chrX:20783706-20798793 (-) // 76.76 // qA2	46.8973	9.70391	17.3883	23.92	16.7756	10.966	30.2458	253.743
1429855_at	1700023I07Rik	76705	chrX:22038757-22039524 (+) // 99.35 // qA2	940.204	43.111	97.926	74.905	137.816	49.3304	131.11	806.3
1445990_at	AU020096	102985	chrX:22746159-22746764 (-) // 66.37 // qA2	6.60884	6.71565	6.40671	13.0988	6.84123	7.22098	6.79637	7.35308
1416242_at	Klhl13	67455	chrX:22796396-22942189 (-) // 96.94 // qA2	13.3388	18.6394	15.6338	12.5151	13.4419	12.246	11.6331	13.2546
1448269_a_at	Klhl13	67455	chrX:22796396-22942189 (-) // 96.94 // qA2	508.17	684.186	767.475	112.162	216.487	64.158	24.0618	17.6872
1430775_at	Wdr44	72404	chrX:23270284-23334211 (+) // 99.82 // qA2	35.6545	74.7558	21.4559	24.4946	14.1689	17.2225	9.6782	15.7103
1435051_at	Wdr44	72404	chrX:23382013-23383149 (+) // 88.87 // qA2	311.044	305.773	138.922	55.9971	21.9242	7.61744	6.32417	5.85585
1424537_at	100040533 /// 100040606 /// 100040722 /// EG546185 /// ENSMUSG00000078216 /// Gmcl1l /// OTTMUSG00000016405 /// OTTMUSG00000016406 /// OTTMUSG00000016407 /// OTTMUSG00000016411 /// OTTMUSG00000016453	100040533 /// 100040606 /// 100040722 /// 434725 /// 546185 /// 627264 /// 630022 /// 668958 /// 668960 /// 668964 /// 71847	chrX:30732653-30734593 (+) // 99.85 // qA3.1 /// chrX:30977812-30979752 (+) // 99.85 // qA3.1 /// chrX:30598330-30600269 (+) // 99.79 // qA3.1 /// chrX:3410687-3412627 (+) // 99.69 // qA1.1 /// chrX:4074983-4076923 (+) // 99.59 // qA1.1 /// chrX:30245501-30247441 (+) // 99.59 // qA3.1 /// chrX:3907030-3908970 (+) // 99.54 // qA1.1 /// chrX:5246204-5248144 (+) // 99.54 // qA1.1 /// chrX:31832279-3…	174.89	27.7556	87.7425	417.296	306.355	133.173	462.036	2090.4
1423744_x_at	Eif2s3x	26905	chrX:31682920-31684277 (+) // 68.19 // qA3.1 /// chrX:91434045-91435407 (-) // 68.44 // qC3	942.71	776.797	581.96	297.984	145.555	49.0493	36.9878	38.6028
1451090_a_at	Eif2s3x	26905	chrX:31682920-31684277 (+) // 68.19 // qA3.1 /// chrX:91434045-91435407 (-) // 68.44 // qC3	982.943	806.836	691.669	220.234	144.346	34.2363	40.5115	35.0982
1422617_at	100039003 /// 100039030 /// 100039065 /// 100043216 /// 382277 /// 619991 /// 664810 /// 664844 /// EG546272 /// ENSMUSG00000059047 /// ENSMUSG00000068103 /// OTTMUSG00000017011 /// OTTMUSG00000017531 /// OTTMUSG00000018086 /// RP23-110D11.1 /// RP23-98M14.2	100039003 /// 100039030 /// 100039065 /// 100039120 /// 100039240 /// 100039550 /// 100039585 /// 100042109 /// 100042144 /// 100042175 /// 100043216 /// 382277 /// 546272 /// 619991 /// 664810 /// 664844	chrX:32607392-32630306 (+) // 95.09 // qA3.1 /// chrX:29483964-29506879 (+) // 95.09 // qA3.1 /// chrX:32944195-32967083 (+) // 95.09 // qA3.2 /// chrX:29130535-29153415 (+) // 94.98 // qA3.1 /// chrX:26660341-26683352 (+) // 93.68 // qA2 /// chrX:27074243-27096969 (+) // 93.68 // qA2 /// chrX:27889235-27912127 (-) // 95.09 // qA3.1 /// chrX:27574936-27597857 (-) // 94.98 // qA3.1 /// chrX:282360…	457.871	242.593	652.233	2694.59	1145.98	814.586	1582.36	7938.65
1422618_x_at	100039003 /// 100039030 /// 100039065 /// 100043216 /// 382277 /// 619991 /// 664810 /// 664844 /// EG546272 /// ENSMUSG00000059047 /// ENSMUSG00000068103 /// OTTMUSG00000017011 /// OTTMUSG00000017531 /// OTTMUSG00000018086 /// RP23-110D11.1 /// RP23-98M14.2	100039003 /// 100039030 /// 100039065 /// 100039120 /// 100039240 /// 100039550 /// 100039585 /// 100042109 /// 100042144 /// 100042175 /// 100043216 /// 382277 /// 546272 /// 619991 /// 664810 /// 664844	chrX:32607392-32630306 (+) // 95.09 // qA3.1 /// chrX:29483964-29506879 (+) // 95.09 // qA3.1 /// chrX:32944195-32967083 (+) // 95.09 // qA3.2 /// chrX:29130535-29153415 (+) // 94.98 // qA3.1 /// chrX:26660341-26683352 (+) // 93.68 // qA2 /// chrX:27074243-27096969 (+) // 93.68 // qA2 /// chrX:27889235-27912127 (-) // 95.09 // qA3.1 /// chrX:27574936-27597857 (-) // 94.98 // qA3.1 /// chrX:282360…	429.594	281.963	642.709	2618.77	1442.44	768.165	1645.94	7371.91
1443467_at	Dock11	75974	chrX:33523248-33523836 (+) // 100.0 // qA3.2	6.46864	7.92989	5.32267	5.6108	5.44134	5.54722	5.44837	5.59916
1429028_at	Dock11	75974	chrX:33584857-33616555 (+) // 99.05 // qA3.2	2197.18	2670.92	2242.16	480.373	747.344	113.217	32.6386	23.5338
1451775_s_at	Il13ra1	16164	chrX:33652125-33709238 (+) // 98.52 // qA3.3	25.2416	27.1496	21.737	7.07047	7.42328	4.49076	4.33868	4.46393
1427164_at	Il13ra1	16164	chrX:33681250-33710375 (+) // 97.17 // qA3.3	69.6112	90.9501	56.9939	14.9812	27.6215	10.3457	10.6723	11.3433
1454783_at	Il13ra1	16164	chrX:33710349-33711257 (+) // 94.94 // qA3.3	19.0285	22.5001	30.3372	9.41184	11.605	9.3362	8.23795	10.4742
1428434_at	Zcchc12	72693	chrX:33736009-33739159 (+) // 71.06 // qA3.3	49.698	62.0208	116.03	85.5392	61.982	36.2886	28.0901	51.6825
1429863_at	Lonrf3	74365	chrX:33868403-33902338 (+) // 99.44 // qA3.3	2069.36	2436.02	2400.64	1166.79	596.838	115.962	32.8335	23.606
1436200_at	Lonrf3	74365	chrX:33906123-33906851 (+) // 95.41 // qA3.3	1842.69	2749.22	2923.82	895.307	763.52	129.227	133.036	74.1889
1423451_at	Pgrmc1	53328	chrX:34138202-34146076 (+) // 90.85 // qA3.3	2680.6	2150.49	1921.91	1363.52	547.364	119.357	166.504	344.892
1457265_at	Sfrs17b	338351	chrX:34148177-34149112 (-) // 100.0 // qA3.3	719.895	1041.49	975.311	356.848	306.604	103.358	30.677	25.3783
1430542_a_at	EG433923 /// EG667030 /// Slc25a5	11740 /// 433923 /// 667030	chrX:34336970-34338795 (+) // 71.71 // qA3.3	359.877	222.636	310.342	362.33	307.765	27.4255	64.3311	83.3553
1434801_x_at	Slc25a5	11740	chrX:34337231-34338771 (+) // 81.17 // qA3.3	122.572	75.8738	117.314	66.7594	98.5871	15.6683	25.423	38.7391
1436874_x_at	Slc25a5	11740	chrX:34337733-34338802 (+) // 90.12 // qA3.3	563.166	360.286	486.726	343.139	381.269	54.7117	115.761	123.34
1429895_at	2310010G23Rik	69591	chrX:34355162-34357180 (-) // 52.82 // qA3.3	84.5935	80.3611	53.3757	8.74494	5.70475	5.10244	5.75986	6.70585
1451202_at	C330007P06Rik	77644	chrX:34388537-34414110 (-) // 98.69 // qA3.3	81.3915	70.4082	47.6566	35.0289	25.0756	17.1344	13.5928	43.8434
1417609_at	Ube2a	22209	chrX:34414304-34424221 (+) // 88.98 // qA3.3	27.2314	22.4978	72.1983	61.5262	21.8581	7.595	7.17806	8.73242
1448772_at	Ube2a	22209	chrX:34414304-34424221 (+) // 88.98 // qA3.3	417.328	436.537	1095.45	852.389	700.957	178.533	290.967	1509.87
1434398_at	Nkrf	77286	chrX:34427475-34429583 (-) // 99.81 // qA3.3	608.882	582.71	489.758	151.491	123.642	33.3091	13.7266	18.7768
1420876_a_at	2010-09-06	56526	chrX:34452227-34529440 (-) // 98.6 // qA3.3	9.80439	9.84614	10.3232	11.9799	10.3003	10.482	12.2559	11.3738
1436819_at	2010-09-06	56526	chrX:34453418-34455043 (-) // 98.96 // qA3.3	22.2101	21.4584	25.7872	24.3511	25.991	24.4105	25.9623	33.4753
1424181_at	2010-09-06	56526	chrX:34455826-34529687 (-) // 98.35 // qA3.3	7.50028	6.96115	11.8141	5.91487	7.01141	6.0635	5.63062	5.61263
1434842_s_at	Upf3b	68134	chrX:34631664-34650257 (-) // 92.63 // qA3.3	55.6718	37.5815	30.8642	28.8201	27.2311	14.169	38.956	91.0585
1419763_at	Nkap	67050	chrX:34666789-34688279 (+) // 98.5 // qA3.3	110.72	101.029	63.5923	36.0128	23.5078	15.7611	14.7815	16.9059
1449589_x_at	Nkap	67050	chrX:34666789-34688279 (+) // 98.5 // qA3.3	71.5714	59.6668	69.8325	30.2638	17.0998	15.9595	14.8157	15.9049
1435662_at	Nkap	67050	chrX:34690088-34690735 (+) // 98.48 // qA3.3	35.8212	29.4048	24.8412	18.8476	18.9898	18.7713	12.3186	14.9551
1457541_at	Akap14	434756	chrX:34690690-34703011 (-) // 100.0 // qA3.3	8.97481	5.61438	10.6682	73.3394	31.3551	25.6022	57.3197	351.03
1422241_a_at	Ndufa1	54405	chrX:34727609-34731158 (-) // 78.4 // qA3.3	9550.63	9466.81	8925.65	8113.37	4672.02	2950.95	1674.61	1013.73
1424837_at	Rnf113a1	69942	chrX:34731253-34732462 (+) // 97.66 // qA3.3	5.11256	7.0372	5.00849	5.62235	4.97941	5.12135	5.06317	5.95762
1443995_at	Gm9	194854	chrX:34748903-34750975 (-) // 100.0 // qA3.3	39.9946	41.8955	42.029	50.7753	45.3928	39.5682	43.2362	154.052
1420448_at	Rhox2a	75199	chrX:34784986-34912221 (+) // 95.55 // qA3.3 /// chrX:35053594-35057961 (-) // 97.78 // qA3.3	1219.92	1172.43	1001.59	594.813	222.297	41.0201	31.3724	16.3309
1419229_at	Rhox4a /// Rhox4b /// Rhox4c /// Rhox4d /// Rhox4e /// Rhox4f /// Rhox4g	194856 /// 434759 /// 57737 /// 636177 /// 664608 /// 664609 /// 664610	chrX:34805439-34810130 (+) // 89.24 // qA3.3 /// chrX:34972078-34976789 (+) // 88.8 // qA3.3 /// chrX:34847069-34851785 (+) // 88.59 // qA3.3 /// chrX:34928983-34933682 (+) // 88.48 // qA3.3 /// chrX:34894932-34899631 (+) // 87.83 // qA3.3 /// chrX:35061007-35065670 (-) // 87.83 // qA3.3 /// chrX:35017401-35022087 (-) // 88.26 // qA3.3	18.4733	21.6009	64.2662	26.9347	38.6699	16.2813	15.6863	23.1405
1443844_at	Rhox13	73614	chrX:35482916-35483143 (+) // 100.0 // qA3.3	5942.06	5132.39	3450.89	1902.67	661.853	158.242	119.198	108.896
1421094_at	Zbtb33	56805	chrX:35543017-35548292 (+) // 99.3 // qA3.3	36.3711	60.8894	77.8449	11.9754	15.4285	7.76139	6.45419	7.1391
1434022_at	Zbtb33	56805	chrX:35548264-35550353 (+) // 96.3 // qA3.3	1097.33	1291.06	1486.97	474.549	478.916	110.848	26.5519	27.7272
1439006_x_at	Fam70a	245386	chrX:35550473-35551272 (-) // 97.31 // qA3.3	10.848	10.9516	13.9404	16.3085	12.6179	12.0057	14.6579	14.6013
1456596_at	Fam70a	245386	chrX:35550473-35551272 (-) // 97.31 // qA3.3	11.5922	13.6373	11.7332	17.0495	11.875	12.3161	12.8698	14.6525
1436948_a_at	Fam70a	245386	chrX:35550479-35550720 (-) // 85.16 // qA3.3	63.7062	98.2204	190.707	271.771	112.824	27.0662	132.719	120.759
1416343_a_at	Lamp2	16784	chrX:35758238-35809556 (-) // 93.85 // qA3.3	458.156	474.415	364.936	127.46	53.3977	11.8721	45.3267	276.151
1416344_at	Lamp2	16784	chrX:35758238-35809556 (-) // 93.85 // qA3.3	511.147	498.811	354.984	232.446	137.778	23.262	27.1694	44.4099
1434503_s_at	Lamp2	16784	chrX:35772656-35773011 (-) // 99.72 // qA3.3	788.979	906.163	837.321	700.691	232.296	52.2719	35.2066	35.2871
1428094_at	Lamp2	16784	chrX:35772678-35809632 (-) // 95.14 // qA3.3	2054.74	2166.43	2118.95	1557.68	550.666	128.441	57.0136	53.0666
1417453_at	Cul4b	72584	chrX:35884705-35929362 (-) // 99.4 // qA3.3	1657.11	1834.56	1714.73	742.555	684.135	155.314	166.164	887.768
1417454_at	Cul4b	72584	chrX:35884705-35929362 (-) // 99.4 // qA3.3	340.478	439.154	597.117	108.841	220.315	31.868	24.7088	17.7971
1425018_at	Mcts1	68995	chrX:35953706-35966699 (+) // 97.76 // qA3.3	119.785	84.3282	91.5192	35.5401	52.7145	19.6509	29.3186	27.812
1416655_at	C1galt1c1	59048	chrX:35983961-35988284 (-) // 96.64 // qA3.3	25.7472	29.2233	32.5772	13.4015	29.2137	6.76013	10.7133	78.2921
1437634_at	Thoc2	331401	chrX:39148168-39150516 (-) // 84.76 // qA4	35.748	32.3478	15.1478	9.67963	7.09713	5.89545	4.82634	6.9016
1438736_at	Thoc2	331401	chrX:39150444-39179307 (-) // 95.56 // qA4	366.235	528.708	335.804	155.719	104.078	42.8807	36.3395	97.2098
1444004_at	Thoc2	331401	chrX:39180359-39189774 (-) // 99.17 // qA4	766.116	1248.93	742.068	579.563	245.34	65.306	63.904	197.641
1453385_at	Xiap	11798	chrX:39412936-39425700 (+) // 82.48 // qA4	4.73301	4.75362	4.64182	5.1356	4.77482	4.9236	4.78176	4.91277
1426636_a_at	Xiap	11798	chrX:39424501-39458447 (+) // 99.8 // qA4	9.13703	9.52788	8.93167	10.0511	9.16186	9.3439	9.60963	11.0498
1440351_at	---	---	chrX:39428274-39429173 (+) // 69.64 // qA4	14.4351	28.2391	9.54104	10.3692	8.77894	8.61384	8.77899	9.09539
1439298_at	---	---	chrX:39437328-39437944 (+) // 40.91 // qA4	6.85391	11.1203	6.58156	6.77893	6.19358	6.21837	6.12212	6.23401
1421394_a_at	Xiap	11798	chrX:39446904-39458742 (+) // 82.65 // qA4	13.1908	14.7099	10.7916	16.112	8.43106	8.97123	8.10125	9.60498
1450231_a_at	Xiap	11798	chrX:39446904-39458742 (+) // 82.65 // qA4	14.7757	9.82436	8.97137	7.40197	6.33873	6.46451	6.27149	7.08233
1450232_at	Xiap	11798	chrX:39446904-39458742 (+) // 82.65 // qA4	11.1058	11.0286	12.1696	10.6751	9.64619	10.4157	9.54861	10.0723
1437533_at	Xiap	11798	chrX:39458663-39462840 (+) // 87.92 // qA4	545.083	486.773	321.735	179.762	83.2647	27.2451	7.44603	7.28244
1456088_at	Xiap	11798	chrX:39458663-39462840 (+) // 87.92 // qA4	91.9026	128.532	42.1039	30.72	13.182	11.7892	8.47698	10.8527
1421849_at	Stag2	20843	chrX:39505356-39630432 (+) // 99.55 // qA4	170.404	131.677	94.3976	36.5547	29.0284	5.21463	6.39113	8.00811
1450396_at	Stag2	20843	chrX:39505356-39630432 (+) // 99.55 // qA4	682.1	981.756	825.871	420.01	231.845	66.7497	58.9398	420.375
1425919_at	Ndufa12	66414	chrX:39517496-39518353 (+) // 42.51 // qA4	19.4833	31.0779	24.5783	14.8651	11.4027	12.3534	11.3058	15.2706
1434170_at	Wdr40b	245404	chrX:42139742-42141420 (-) // 98.93 // qA4	12.0088	10.1058	10.4819	10.5095	9.59187	10.0394	9.46612	10.4052
1454869_at	Wdr40b	245404	chrX:42139742-42141420 (-) // 98.93 // qA4	11.7528	11.4631	11.1807	19.9308	12.1711	14.2958	13.2814	18.6625
1429135_at	1110059M19Rik	68800	chrX:42444121-42445968 (+) // 98.71 // qA4	4.4672	4.46162	4.41041	4.63938	5.3844	4.62734	7.31119	71.2766
1449825_at	Actrt1	73360	chrX:43682183-43683528 (+) // 99.93 // qA4	134.516	5.30745	11.4559	7.49321	7.45483	6.15356	8.2236	142.259
1460292_a_at	Smarca1	93761	chrX:45162876-45245719 (-) // 99.33 // qA4	11.9539	7.01491	7.19259	8.03223	7.534	7.34654	6.73389	7.26396
1457313_at	Ocrl	320634	chrX:45268076-45268758 (+) // 82.47 // qA4	11.34	17.2458	11.4187	8.2301	7.725	6.59825	6.90487	6.73117
1438284_at	Ocrl	320634	chrX:45309593-45310254 (+) // 97.77 // qA4	7.18189	7.22579	6.3253	5.52211	5.36363	5.31693	5.18215	5.38353
1438396_at	Ocrl	320634	chrX:45317324-45319048 (+) // 99.71 // qA4	47.3479	48.8055	37.7937	9.05283	11.1643	4.68088	5.58936	6.18251
1451038_at	Apln	30878	chrX:45378383-45388030 (-) // 93.97 // qA4	77.3082	147.275	129.001	53.2368	46.2305	22.8135	38.6506	18.976
1427007_at	Sash3	74131	chrX:45499655-45514742 (+) // 98.39 // qA4	5.52001	5.14082	4.50012	4.80127	4.73761	4.85621	5.60923	7.99613
1454787_at	Zdhhc9	208884	chrX:45525143-45525584 (-) // 76.75 // qA4	181.608	207.52	189.357	59.0009	59.3015	14.2152	10.0377	11.5429
1458142_at	Zdhhc9	208884	chrX:45559267-45559918 (-) // 96.8 // qA4	9.69205	19.3654	9.8137	9.38731	8.67489	9.2793	8.69053	9.15754
1432250_at	Utp14a	72554	chrX:45609942-45616810 (+) // 51.49 // qA4	7.43137	9.30047	8.56032	9.70959	7.28703	7.55182	8.23374	9.05345
1435099_at	Utp14a	72554	chrX:45630729-45635630 (+) // 96.17 // qA4	476.135	565.287	376.647	278.55	74.7377	12.6287	16.8561	105.133
1454172_at	Bcorl1	320376	chrX:45695237-45715600 (+) // 99.74 // qA4	6.86289	8.22787	8.19376	7.20484	6.7965	7.13747	6.94682	7.4117
1438469_at	Bcorl1	320376	chrX:45753756-45759894 (+) // 100.0 // qA4	19.9878	28.7694	28.251	16.1005	14.9463	9.37061	7.14675	57.8759
1430672_at	5033418A18Rik	75961	chrX:45794756-45796288 (-) // 93.5 // qA4	9.52226	14.4134	16.0729	9.48286	9.40966	9.76767	8.73178	8.94099
1445778_at	---	---	chrX:45799155-45800263 (-) // 99.73 // qA4	8.15949	7.14104	7.28828	10.4919	8.60072	7.5076	7.48948	7.72127
1418127_a_at	Aifm1	26926	chrX:45828120-45866740 (-) // 94.51 // qA4	1598.2	1807.92	1759.22	726.781	610.817	115.904	34.1471	26.3207
1417529_at	Rab33a	19337	chrX:45872491-45883417 (+) // 99.74 // qA4	20.0872	32.8421	27.7734	12.3263	11.5006	7.34523	7.02416	7.41536
1427983_at	Zfp280c	208968	chrX:45894839-45945310 (-) // 96.86 // qA4	13.3315	19.0929	25.0112	12.3235	10.1433	6.23001	9.1935	9.4343
1417154_at	Slc25a14	20523	chrX:45976842-46015474 (+) // 94.24 // qA4	167.023	148.477	140.388	122.264	54.7899	14.9273	12.7819	87.1517
1424705_at	Rbmx2	209003	chrX:46048255-46063854 (+) // 94.64 // qA4	446.853	461.449	392.901	218.787	80.5136	18.2287	13.0079	9.12046
1427043_s_at	Enox2	209224	chrX:46363634-46404942 (-) // 97.74 // qA4	35.5305	44.1783	46.4459	29.9379	25.2109	23.8987	22.3154	22.3919
1451657_a_at	Enox2	209224	chrX:46364625-46641419 (-) // 99.03 // qA4	8.80958	7.51519	7.92034	7.64918	6.28245	6.81299	6.34143	7.0931
1438915_at	6720401G13Rik	103012	chrX:47908927-47909357 (-) // 99.07 // qA5	11.6898	8.74546	10.1377	5.40629	5.24289	5.27507	5.30115	5.24603
1438916_x_at	6720401G13Rik	103012	chrX:47908927-47909357 (-) // 99.07 // qA5	17.1148	17.8979	14.9285	7.52321	7.49315	7.23313	6.74808	7.00218
1435744_at	6720401G13Rik	103012	chrX:47916296-47922553 (-) // 97.53 // qA5	73.498	69.2269	85.9444	10.4453	20.268	10.3456	10.0614	10.3709
1419032_at	2610018G03Rik	70415	chrX:48194223-48246471 (+) // 98.96 // qA5	13.4375	19.0384	12.5849	13.3078	12.637	11.4168	13.716	58.9665
1419033_at	2610018G03Rik	70415	chrX:48194223-48246471 (+) // 98.96 // qA5	27.7261	15.361	20.0517	8.05006	8.8786	6.68912	11.5676	8.98546
1437016_x_at	LOC100047558 /// Rap2c	100047558 /// 72065	chrX:48357460-48357771 (-) // 85.63 // qA5	517.94	563.018	588.794	265.946	223.089	49.136	10.4021	19.4397
1428119_a_at	LOC100047558 /// Rap2c	100047558 /// 72065	chrX:48357463-48371313 (-) // 92.42 // qA5	367.356	393.991	347.542	164.632	114.872	19.326	13.7729	13.7032
1460430_at	LOC100047558 /// Rap2c	100047558 /// 72065	chrX:48357463-48371313 (-) // 92.42 // qA5	327.603	304.168	251.06	61.7758	74.7111	15.2494	8.26344	11.4492
1434678_at	Mbnl3	171170	chrX:48466677-48468293 (-) // 93.78 // qA5	114.203	130.438	75.2945	9.21532	16.5771	4.94219	4.89881	4.89502
1442549_at	Mbnl3	171170	chrX:48470442-48471160 (-) // 100.0 // qA5	15.9937	27.2652	8.48146	8.41162	7.62315	7.95846	7.51939	7.85621
1422836_at	Mbnl3	171170	chrX:48473257-48559167 (-) // 96.39 // qA5	3462.1	3743.47	2090.4	1153.14	294.498	83.2839	41.7917	25.5895
1443383_at	---	---	chrX:48536289-48536909 (-) // 100.0 // qA5	70.0698	99.0454	46.2837	25.1462	16.0042	12.6531	11.9209	15.9331
1441530_at	---	---	chrX:48555706-48556377 (-) // 98.96 // qA5	25.6225	100.99	23.5269	12.1265	10.8861	10.1762	10.0173	10.2122
1442664_at	---	---	chrX:48557361-48557959 (+) // 91.49 // qA5	13.5235	46.4349	5.94265	12.5685	5.11212	5.2986	5.05408	6.71582
1450047_at	Hs6st2	50786	chrX:48739984-49034558 (-) // 94.58 // qA5	398.565	530.938	304.512	109.821	53.3269	9.3991	11.2773	14.6268
1421502_at	Usp26	83563	chrX:49107135-49154408 (-) // 99.9 // qA5	6.90855	8.25126	6.68679	5.93185	5.18498	5.89074	5.31533	5.67303
1453453_at	1700080O16Rik	74279	chrX:49321871-49325949 (-) // 99.93 // qA5	67.6409	23.6764	45.4272	92.9765	82.8336	40.4587	120.822	655.22
1436514_at	Gpc4	14735	chrX:49404062-49405714 (-) // 97.05 // qA5	10.2916	12.3466	10.8422	9.9606	9.60999	8.50867	9.01909	9.59895
1421088_at	Gpc4	14735	chrX:49406123-49518429 (-) // 90.24 // qA5	197.202	264.188	268.125	101.127	77.8125	15.0249	13.8314	11.7718
1450990_at	Gpc3	14734	chrX:49625602-49967149 (-) // 95.87 // qA5	32.097	28.1614	26.5363	16.2957	15.4505	10.1604	10.3375	12.5191
1437936_at	6330534C20Rik	434778	chrX:50151990-50152672 (+) // 96.64 // qA5	24.5926	23.7638	27.2493	40.0763	29.1477	30.1287	46.3096	86.79
1430415_at	Phf6	70998	chrX:50265416-50266573 (+) // 99.65 // qA5	61.8113	106.252	88.369	58.2267	41.7118	30.4275	33.4112	93.0127
1454625_at	Phf6	70998	chrX:50308453-50310120 (+) // 98.23 // qA5	17.4834	17.0162	13.9865	23.9511	13.9763	15.4542	14.1016	18.3474
1448736_a_at	Hprt1	15452	chrX:50341268-50374837 (+) // 97.52 // qA5	2449.94	2287.36	1986.49	1159.9	524.548	92.3746	54.4569	40.5086
1417553_at	Plac1	56096	chrX:50423174-50467703 (-) // 97.71 // qA5	6.78618	6.76298	7.73711	20.6115	8.44169	7.61022	14.1049	31.6579
1452682_at	Fam122b	78755	chrX:50596581-50622236 (-) // 99.72 // qA5	33.996	16.4635	21.8305	11.4424	5.12255	4.26085	4.19383	4.68016
1453955_a_at	Fam122c	73866	chrX:50626600-50654668 (+) // 98.39 // qA5	166.082	15.8784	28.0445	106.455	75.3139	37.2489	155.713	831.774
1454154_at	4933416I08Rik	71159	chrX:50989700-50994496 (+) // 97.53 // qA5 /// chrX_random:956424-958285 (-) // 48.48 // /// chrX:50880263-50883147 (-) // 58.67 // qA5	4.30025	4.34057	4.12162	4.55798	7.77014	4.6127	6.03856	80.1495
1429934_at	4930502E18Rik	75013	chrX:51028002-51041618 (+) // 99.72 // qA5	156.74	152.038	128.186	71.7055	32.1837	12.9467	20.9659	21.6762
1453331_at	1700013H16Rik	75514	chrX:51046076-51060990 (-) // 99.92 // qA5	659.829	508.29	297.169	179.408	71.8723	36.0064	50.6602	227.933
1422011_s_at	3830403N18Rik /// Xlr	22441 /// 70691	chrX:51086908-51100873 (-) // 92.63 // qA5	100.228	80.6735	128.335	75.8212	64.4661	37.8444	35.5051	61.5382
1446887_at	---	---	chrX:51480553-51850395 (-) // 90.68 // qA5 /// chrX:52031807-52032392 (-) // 98.64 // qA5 /// chrX:52129586-52130171 (-) // 98.64 // qA5 /// chrX:52974065-52974650 (-) // 98.47 // qA5 /// chrX:51667731-51668316 (-) // 98.47 // qA5 /// chrX:51758805-51759390 (-) // 98.47 // qA5 /// chrX:52287903-52288488 (-) // 98.47 // qA5 /// chrX:52495525-52496110 (-) // 98.47 // qA5 /// chrX:52364248-52699322 …	4.53651	4.57107	4.61034	4.79248	4.62361	4.69336	15.927	34.3246
1453217_at	4930527E24Rik	75140	chrX:52114016-52130968 (+) // 95.39 // qA5 /// chrX:52480052-52496907 (+) // 95.39 // qA5 /// chrX:51743293-51760187 (+) // 95.26 // qA5 /// chrX:51834349-51851192 (+) // 95.26 // qA5 /// chrX:51925352-51942195 (+) // 95.26 // qA5 /// chrX:52016367-52033189 (+) // 95.39 // qA5 /// chrX:52272398-52289285 (+) // 95.12 // qA5 /// chrX:52348749-52365630 (+) // 95.12 // qA5 /// chrX:51652253-51669113 …	410.064	161.275	653.325	1812.96	1254.27	823.622	2126.69	8676.31
1426074_at	---	---	chrX:52766480-52767314 (+) // 40.81 // qA5	5.77036	5.63222	5.55404	6.09249	5.75402	5.75749	7.9577	20.656
1444548_at	1600025M17Rik	72030	chrX:53570784-53573843 (+) // 99.82 // qA5	4.53499	4.54171	4.49249	4.84141	4.7021	4.78855	4.67526	62.8216
1439945_at	Zfp449	78619	chrX:53618259-53618849 (+) // 96.88 // qA5	18.8192	17.5442	40.6432	9.27369	18.3705	8.16684	8.06785	9.46748
1435200_at	Ncrna00086	320237	chrX:53630002-53630977 (+) // 98.48 // qA5 /// chrX:50815189-50816153 (+) // 94.54 // qA5 /// chrX:51016856-51017820 (-) // 94.44 // qA5	11.5639	11.3342	12.9085	12.1244	11.1579	12.2522	11.4263	12.242
1426832_at	Ddx26b	236790	chrX:53752788-53761020 (+) // 97.19 // qA5	164.098	158.912	82.3984	32.6662	21.269	9.24651	8.44955	12.5105
1436705_at	Mmgt1	236792	chrX:53838692-53840710 (-) // 71.9 // qA5	1164.14	1053.65	807.756	263.099	158.755	29.497	12.8405	12.8094
1436706_at	Mmgt1	236792	chrX:53838692-53840710 (-) // 71.9 // qA5	14.2437	13.0542	12.0091	7.58389	7.15952	7.38739	7.20842	7.26574
1435008_at	Slc9a6	236794	chrX:53891488-53917406 (+) // 99.48 // qA5	879.107	1665.68	1708.84	1009.25	529.441	115.938	26.5802	21.4573
1435009_at	Slc9a6	236794	chrX:53891488-53917406 (+) // 99.48 // qA5	1071.03	1102.97	584.796	522.244	72.52	23.2006	11.4338	11.6064
1417872_at	Fhl1	14199	chrX:53984937-54046523 (+) // 96.35 // qA5	486.476	531.84	467.717	185.172	224.83	30.2347	22.0233	24.6397
1431058_at	Htatsf1	72459	chrX:54306640-54310333 (+) // 80.54 // qA5	78.696	98.372	61.3162	42.1031	25.6528	20.7408	19.9531	25.3002
1431059_x_at	Htatsf1	72459	chrX:54306640-54310333 (+) // 80.54 // qA5	69.1478	96.4259	70.3406	26.3988	17.0668	9.96022	9.53345	13.0857
1454760_at	Htatsf1	72459	chrX:54307208-54320357 (+) // 97.17 // qA5	2029.31	2134.09	2124.73	677.833	592.064	119.924	92.8752	105.101
1440933_at	4732460I02Rik	320929	chrX:54631631-54632303 (-) // 99.55 // qA5	7.66167	7.54234	7.30393	7.81266	7.4662	7.74877	7.94244	8.16365
1426863_at	Rbmx	19655	chrX:54636524-54646143 (-) // 97.88 // qA5	34.8138	25.9804	16.0855	7.17811	6.16956	4.45568	9.64794	38.7688
1416354_at	Rbmx	19655	chrX:54638759-54646204 (-) // 99.14 // qA5	41.5797	57.5412	34.8871	21.8458	19.9733	11.054	20.2592	21.0389
1416355_at	Rbmx	19655	chrX:54638759-54646204 (-) // 99.14 // qA5	6.18551	9.29978	5.63603	6.0362	5.75271	5.9021	6.92931	5.84114
1437847_x_at	Rbmx	19655	chrX:54639524-54639709 (-) // 63.36 // qA5	5.96687	5.98112	5.89751	6.10022	5.8087	6.0884	5.88721	6.03781
1440692_at	Gm364	245423	chrX:54717440-54741946 (+) // 100.0 // qA5	2801.02	3278.28	2475.01	3327.94	419.504	84.6923	84.5985	274.052
1423424_at	Zic3	22773	chrX:55283819-55289087 (+) // 92.38 // qA6	6.54081	6.29618	7.30145	6.76949	6.44948	6.47846	6.26539	23.7474
1450793_at	4930550L24Rik	75352	chrX:56162536-56173487 (+) // 99.65 // qA6	258.613	180.52	207.394	188.724	115.078	21.9802	35.6674	196.591
1418497_at	Fgf13	14168	chrX:56315326-56387613 (-) // 98.77 // qA6	770.001	955.376	797.052	235.09	190.759	32.4987	8.04448	7.2488
1430929_at	9430082L08Rik	77374	chrX:56345815-56347352 (-) // 97.01 // qA6	6.9085	6.52182	6.71216	7.6267	6.81668	6.80242	6.55699	7.1167
1419021_at	Mcf2	109904	chrX:57309125-57400877 (-) // 99.3 // qA6	7.48577	7.15224	7.19122	8.5945	7.38363	7.65647	7.41226	8.26144
1455083_at	Atp11c	320940	chrX:57476196-57477128 (-) // 90.97 // qA6	569.036	761.922	449.451	319.317	91.0772	24.296	23.5267	43.1477
1452496_at	Atp11c	320940	chrX:57478799-57520007 (-) // 97.87 // qA6	680.03	874.928	462.519	167.066	92.3309	19.3697	40.7188	236.458
1437600_at	---	---	chrX:57480169-57480887 (-) // 94.06 // qA6	11.4856	21.8804	9.5936	10.6595	9.33201	10.9111	9.97996	10.5731
1442367_at	Atp11c	320940	chrX:57523004-57534908 (-) // 99.67 // qA6	8.28085	6.44749	8.39996	7.25203	6.37773	6.72373	6.38764	6.93661
1443003_at	---	---	chrX:57537264-57537862 (-) // 83.52 // qA6	20.7697	43.3247	13.8443	9.06999	7.46074	7.96831	7.4921	11.3916
1445379_at	---	---	chrX:57602731-57603242 (-) // 78.49 // qA6	10.9113	67.3247	16.9765	9.88662	8.27286	8.95562	8.26225	9.42282
1445503_at	Gm715	279618	chrX:57801795-57802292 (+) // 83.25 // qA6	296.508	385.046	371.433	82.7101	64.8216	6.67427	6.37366	7.01083
1435192_at	Sox3	20675	chrX:58144540-58145249 (-) // 94.24 // qA6	1313.18	1808.31	2130.4	742.299	972.586	170.027	39.5192	25.7192
1445342_at	---	---	chrX:58441950-58442614 (+) // 98.65 // qA6	7.84147	7.78871	7.41543	11.1192	8.03118	8.56455	8.04135	8.87939
1435815_at	Ldoc1	434784	chrX:58963393-58964128 (+) // 98.0 // qA6	4.08213	4.10241	4.03478	4.22272	4.11472	4.24312	4.12901	4.16643
1429511_at	4933402E13Rik	74437	chrX:59540316-59545257 (+) // 99.85 // qA6	50.062	52.7797	92.6955	65.5889	51.7529	29.9331	64.3691	32.9681
1431532_at	4931400O07Rik	70936	chrX:59721165-59721987 (+) // 99.54 // qA6	11.8401	11.7673	10.8594	18.3418	12.6178	14.8948	15.3613	175.404
1430162_at	3830417A13Rik	70696	chrX:61426725-61431938 (+) // 99.08 // qA6	11.7199	9.07437	22.5343	40.484	34.5386	15.9527	73.1671	403.127
1429928_at	Ctag2	70062	chrX:62300818-62302192 (+) // 99.77 // qA7.1	281.661	30.3593	52.3086	115.224	148.656	48.449	166.488	893.049
1432516_at	4930447F04Rik	74862	chrX:63556535-63557399 (-) // 99.43 // qA7.1	9.22802	9.23512	8.59396	13.3969	9.95545	11.0193	16.0456	189.021
1446051_at	Gm1140	382217	chrX:64959442-64960163 (+) // 99.59 // qA7.1 /// chrX:64935436-64936157 (-) // 99.59 // qA7.1	794.227	858.552	763.41	449.211	171.34	41.0898	21.6232	12.8825
1420787_at	4933436I01Rik	66780	chrX:65173036-65174625 (-) // 100.0 // qA7.1	9.62969	7.46412	11.4473	16.5786	24.3567	8.72333	56.1421	407.46
1423369_at	Fmr1	14265	chrX:65931756-65971138 (+) // 97.6 // qA7.1	2337.89	2332.66	1881.96	773.819	403.483	81.1997	43.3394	113.369
1452550_a_at	Fmr1	14265	chrX:65948186-65951046 (+) // 94.09 // qA7.1	19.6573	21.4549	16.2689	16.3703	13.6603	16.9095	12.7289	19.5584
1434739_at	Fmr1nb	207854	chrX:66015028-66057768 (+) // 98.02 // qA7.1	935.581	1080.68	1231.73	1661.47	235.093	86.2588	97.2713	373.097
1421664_a_at	Styx	56291	chrX:66074283-66075384 (+) // 84.29 // qA7.1	2306.28	2488.56	2482.42	2145.17	2817.28	2269.79	3715.01	3072.3
1422116_at	Aff2	14266	chrX:66613614-67121212 (+) // 97.37 // qA7.1	6.08747	5.94628	5.95789	6.58923	6.06303	6.41965	8.32245	6.31332
1453542_at	2610007B07Rik	72439	chrX:66662400-66664367 (+) // 99.85 // qA7.1	4.25088	4.27574	4.15567	4.66906	4.32474	4.46272	4.44556	6.07495
1443847_x_at	Aff2	14266	chrX:67125014-67125227 (+) // 100.0 // qA7.1	6.04897	5.94935	5.89864	6.63201	6.09466	6.37802	5.95063	6.43563
1430524_at	1700020N15Rik /// EG627927	627927 /// 75509	chrX:67198474-67199153 (+) // 99.62 // qA7.1 /// chrX:66145549-66146228 (-) // 99.05 // qA7.1	2015.14	173.17	195.14	241.412	361.955	121.202	285.874	1286.06
1455481_at	Ids	15931	chrX:67596146-67597072 (-) // 96.2 // qA7.1	434.952	487.552	333.202	46.0684	30.9221	6.23544	5.34741	4.52181
1434751_at	Ids	15931	chrX:67596970-67598973 (-) // 87.81 // qA7.1	308.067	291.607	209.549	112.272	26.7913	6.41129	6.37022	6.26531
1450166_at	Ids	15931	chrX:67598981-67618066 (-) // 96.27 // qA7.1	4.94402	4.26361	5.12221	5.02935	4.29975	4.42217	4.26553	4.36788
1451302_at	1110012L19Rik	68618	chrX:67639051-67642592 (+) // 98.47 // qA7.1	224.452	166.744	228.949	142.1	146.047	31.8904	12.04	14.2226
1435228_at	BC023829 /// LOC100045774	100045774 /// 236848	chrX:67712927-67713571 (-) // 93.6 // qA7.1	613.04	671.888	610.838	447.945	189.375	54.2693	104.427	615.436
1416934_at	Mtm1	17772	chrX:68463941-68568470 (+) // 97.71 // qA7.2	62.7615	43.9663	45.8684	26.7575	13.1828	13.0149	17.4289	26.9892
1421879_at	Mtmr1	53332	chrX:68617964-68672368 (+) // 97.28 // qA7.2	8.6038	6.71493	5.86352	6.03488	5.76743	5.99865	5.73349	6.01293
1421880_at	Mtmr1	53332	chrX:68617964-68672368 (+) // 97.28 // qA7.2	35.0317	25.3385	12.116	10.3884	8.14498	9.12541	7.80661	8.95401
1423965_at	Cd99l2	171486	chrX:68673238-68745820 (-) // 98.25 // qA7.2	16.2757	22.2941	17.0494	9.32241	10.6094	8.59255	8.51054	7.65933
1423966_at	Cd99l2	171486	chrX:68673238-68745820 (-) // 98.25 // qA7.2	25.3769	24.6809	23.1216	5.60912	6.56393	4.63677	4.51858	4.96986
1456746_a_at	Cd99l2	171486	chrX:68674228-68674488 (-) // 96.93 // qA7.2	84.3417	81.2813	70.2754	18.3609	23.8362	34.538	13.9205	20.3975
1416155_at	Hmgb3	15354	chrX:68809091-68813829 (+) // 94.4 // qA7.2	4953.01	4627.57	4947.56	2258.84	1508.85	258.472	197.217	103.471
1455498_at	Gpr50	14765	chrX:68921945-68922431 (+) // 97.96 // qA7.2	8.32665	16.8135	9.46169	6.96547	6.20205	6.58426	6.15107	6.56658
1427937_at	2610030H06Rik	67048	chrX:69062119-69068353 (+) // 97.11 // qA7.2	157.471	174.64	94.1222	10.8904	7.20993	7.13457	6.97437	7.11691
1452607_at	2610030H06Rik	67048	chrX:69062119-69068353 (+) // 97.11 // qA7.2	392.404	403.347	324.594	113.113	73.8973	20.6632	14.9074	7.66199
1434232_a_at	2610030H06Rik	67048	chrX:69068131-69070045 (+) // 90.91 // qA7.2	44.8861	47.6031	45.8743	5.36288	10.4836	5.41584	5.17542	5.20987
1434233_at	2610030H06Rik	67048	chrX:69068131-69070045 (+) // 90.91 // qA7.2	16.6964	22.046	22.2007	9.05483	8.61702	4.82201	7.93794	7.62956
1439549_at	Prrg3	208748	chrX:69217393-69218061 (+) // 97.94 // qA7.3	7.89455	6.29783	5.55671	5.6526	4.98792	5.48945	5.38165	4.95755
1450594_at	Magea4	17140	chrX:69467355-69468303 (+) // 99.47 // qA7.3	28.6605	20.0324	18.4349	13.8213	13.3902	8.86999	9.11873	11.32
1421629_at	Gabre	14404	chrX:69502770-69520060 (-) // 62.5 // qA7.3	4.5028	4.57119	4.48885	4.85973	4.59188	4.69316	4.5666	4.65202
1418579_at	Cetn2	26370	chrX:70158828-70163745 (-) // 99.4 // qA7.3	896.553	813.349	850.949	428.479	227.497	13.8333	9.11258	50.8369
1438647_x_at	Cetn2	26370	chrX:70159044-70159312 (-) // 93.03 // qA7.3	2802.87	3029.99	3085.16	1509.85	782.089	166.953	74.1856	155.264
1416222_at	Nsdhl	18194	chrX:70163859-70203867 (+) // 99.51 // qA7.3	499.688	490.014	457.737	220.866	182.92	17.4601	32.9556	63.2743
1458831_at	Nsdhl	18194	chrX:70196977-70197598 (-) // 35.73 // qA7.3	8.44392	8.35406	7.96474	9.56595	8.4991	9.69784	9.98498	9.73817
1420943_at	Zfp185	22673	chrX:70232677-70276879 (+) // 99.66 // qA7.3	38.5917	35.094	26.3029	24.1784	8.78874	4.76733	7.74183	48.7123
1420944_at	Zfp185	22673	chrX:70232677-70276879 (+) // 99.66 // qA7.3	263.71	269.752	255.733	118.912	47.6859	10.7359	8.27282	14.0486
1439207_at	Pnma5	385377	chrX:70279321-70280685 (-) // 99.81 // qA7.3	631.872	592.14	522.626	211.989	192.002	21.6501	9.47802	9.51606
1429745_at	DXBay18 /// EG434797 /// EG546325 /// EG667413 /// OTTMUSG00000017677	434797 /// 546325 /// 574404 /// 574405 /// 667413	chrX:70362385-70374617 (+) // 99.69 // qA7.3 /// chrX:70537661-70553119 (+) // 92.96 // qA7.3 /// chrX:72077279-72088708 (+) // 95.21 // qA7.3 /// chrX:70382552-70394789 (-) // 99.83 // qA7.3 /// chrX:71884443-71896226 (-) // 95.28 // qA7.3	37.0908	38.4714	42.6711	38.5543	35.6724	21.8552	50.4846	376.007
1422933_at	Xlr5a /// Xlr5b /// Xlr5c	27084 /// 574438 /// 627081	chrX:70396595-70403739 (+) // 95.64 // qA7.3 /// chrX:71898017-71905162 (+) // 94.21 // qA7.3 /// chrX:70353443-70360579 (-) // 99.43 // qA7.3 /// chrX:70528706-70535854 (-) // 99.53 // qA7.3 /// chrX:72068337-72075488 (-) // 94.4 // qA7.3	2404.93	2528.95	2243.36	1155.22	881.202	174.475	66.2639	125.927
1443483_at	Xlr5a /// Xlr5b /// Xlr5c	27084 /// 574438 /// 627081	chrX:70403644-70404225 (+) // 99.14 // qA7.3 /// chrX:71905067-71905646 (+) // 98.11 // qA7.3 /// chrX:70528220-70528801 (-) // 99.83 // qA7.3 /// chrX:70352959-70353538 (-) // 99.48 // qA7.3 /// chrX:72067853-72068432 (-) // 98.11 // qA7.3 /// chrX:71873091-71873682 (-) // 94.33 // qA7.3	154.151	158.797	178.551	37.0463	75.1182	8.46505	7.60793	10.3639
1449347_a_at	Xlr4a /// Xlr4b /// Xlr4c	27083 /// 434794 /// 72891	chrX:70459703-70467795 (+) // 98.25 // qA7.3 /// chrX:72189392-72197691 (+) // 96.96 // qA7.3 /// chrX:71971657-71979788 (+) // 96.35 // qA7.3 /// chrX:70319656-70488415 (-) // 99.7 // qA7.3 /// chrX:70322071-70327822 (-) // 61.95 // qA7.3	5049.19	5590.36	5573.72	2729.91	1333.74	240.314	94.3981	51.709
1417412_at	F8a	14070	chrX:70473356-70474858 (+) // 80.61 // qA7.3	30.6193	21.9287	16.7436	15.4862	10.9715	9.9328	9.67466	11.9411
1418397_at	Zfp275	27081	chrX:70587973-70604309 (+) // 93.85 // qA7.3	122.237	95.3868	100.496	33.5324	35.8334	10.1658	16.5273	9.82801
1424277_at	Haus7 /// LOC100044098	100044098 /// 73738	chrX:70682653-70704383 (-) // 99.0 // qA7.3	461.097	473.536	500.135	200.563	161.437	28.5384	39.9309	133.806
1416405_at	Bgn	12111	chrX:70728982-70741722 (+) // 95.4 // qA7.3	86.7607	7.96	7.57709	6.22733	6.92816	3.46707	4.73008	19.8622
1448323_a_at	Bgn	12111	chrX:70728982-70741722 (+) // 95.4 // qA7.3	86.9517	9.20536	10.8554	11.1281	11.3874	10.0396	10.0558	30.1211
1437889_x_at	Bgn	12111	chrX:70740858-70741271 (+) // 45.27 // qA7.3	60.5209	11.0195	10.7065	12.7857	11.6975	10.9401	11.3886	19.767
1442645_at	Atp2b3	320707	chrX:70802923-70803553 (+) // 99.84 // qA7.3	4.09421	4.48504	4.11565	4.28716	4.10731	4.32829	4.39695	4.27586
1433844_a_at	Dusp9	75590	chrX:70886957-70888851 (+) // 96.77 // qA7.3	198.86	257.267	401.716	170.863	102.142	40.9275	25.2294	24.1329
1433845_x_at	Dusp9	75590	chrX:70886957-70888851 (+) // 96.77 // qA7.3	641.756	968.984	1180.56	469.547	264.676	41.1174	17.6409	10.1244
1454737_at	Dusp9	75590	chrX:70886957-70888851 (+) // 96.77 // qA7.3	726.866	1135.25	1302.79	576.462	318.9	71.5031	10.1489	9.28262
1417116_at	Slc6a8	102857	chrX:70918488-70927841 (+) // 96.7 // qA7.3	98.1091	82.9425	61.9258	92.9434	48.3498	56.4618	48.0297	63.2845
1448596_at	Slc6a8	102857	chrX:70918488-70927841 (+) // 96.7 // qA7.3	11.6135	10.4689	8.07397	6.86564	8.14452	8.51574	8.29627	9.61382
1451049_at	Bcap31	27061	chrX:70931516-70961761 (-) // 94.28 // qA7.3	1416.92	1538.95	1430.87	874.421	421.194	73.3171	64.4556	146.749
1418838_at	Abcd1	11666	chrX:70961935-70983867 (+) // 98.3 // qA7.3	65.3953	52.3416	58.8491	51.7884	47.1361	44.4734	46.8608	251.678
1432139_at	Srpk3	56504	chrX:71021566-71024255 (+) // 98.25 // qA7.3	6.12206	6.17175	5.97101	6.94823	6.26481	6.6857	6.15673	6.57219
1416788_a_at	Idh3g	15929	chrX:71024301-71032302 (-) // 93.88 // qA7.3	1426.2	1454.92	736.372	405.012	302.635	53.1788	54.1923	68.992
1416789_at	Idh3g	15929	chrX:71024301-71032302 (-) // 93.88 // qA7.3	963.469	723.936	514.274	196.154	193.754	17.3114	16.1513	20.1794
1448524_s_at	Ssr4	20832	chrX:71032389-71036169 (+) // 88.77 // qA7.3	720.542	540.633	369.258	370.789	113.171	32.201	46.7118	40.9992
1435457_at	Pdzd4	245469	chrX:71038695-71039126 (-) // 86.9 // qA7.3	7.42746	7.63012	7.83772	8.65267	8.77971	8.34898	8.51421	8.67734
1450435_at	L1cam	16728	chrX:71099122-71126096 (-) // 98.11 // qA7.3	12.4072	7.44169	12.5321	7.52764	7.3642	5.34114	5.72236	7.66703
1419296_at	Arhgap4	171207	chrX:71139696-71156633 (-) // 89.29 // qA7.3	13.1652	10.4034	9.73054	9.53742	8.64553	9.84578	8.51852	8.83985
1443360_x_at	Arhgap4	171207	chrX:71144663-71145650 (-) // 96.51 // qA7.3	2.93313	3.10086	2.9039	3.09083	2.95364	2.99399	3.42517	3.20112
1458190_at	Arhgap4	171207	chrX:71144663-71145650 (-) // 96.51 // qA7.3	2.95146	3.65484	2.91586	3.09281	2.95877	3.01098	2.94459	3.10882
1417118_a_at	Ard1a	56292	chrX:71162211-71167279 (-) // 99.58 // qA7.3	169.456	169.611	130.432	68.2879	59.0434	22.956	15.6033	16.3137
1450107_a_at	Renbp	19703	chrX:71167460-71176148 (-) // 98.36 // qA7.3	14.8416	27.0324	28.9535	8.53222	17.4852	10.8059	10.3214	12.0395
1433736_at	Hcfc1	15161	chrX:71188130-71189421 (-) // 97.58 // qA7.3	2353.67	2352.9	2378.16	676.701	868.675	103.931	55.1221	60.1546
1421972_s_at	Hcfc1	15161	chrX:71188732-71211692 (-) // 98.52 // qA7.3	91.8448	60.8138	46.9667	19.7528	19.3878	10.0475	16.6227	12.1358
1450439_at	Hcfc1	15161	chrX:71188732-71211692 (-) // 98.52 // qA7.3	14.4761	19.228	14.9467	6.7448	7.34961	5.6465	5.96858	7.66592
1448668_a_at	Irak1	16179	chrX:71259452-71269254 (-) // 91.15 // qA7.3	328.711	292.432	200.577	130.414	71.1287	18.5008	31.46	16.96
1460649_at	Irak1	16179	chrX:71259452-71269254 (-) // 91.15 // qA7.3	250.011	199.959	154.526	103.307	47.3768	11.0328	9.54145	27.4298
1438857_x_at	Irak1	16179	chrX:71260143-71260513 (-) // 59.59 // qA7.3	84.6723	91.0517	57.3317	48.167	33.2753	47.028	30.7255	27.1184
1438120_x_at	Irak1	16179	chrX:71260144-71260308 (-) // 64.43 // qA7.3	212.822	191.285	126.415	109.536	67.7822	17.7475	11.3852	32.9857
1438930_s_at	Mecp2	17257	chrX:71271927-71272270 (-) // 98.55 // qA7.3	9.06191	9.32234	4.09022	4.20336	4.01485	4.10985	3.9805	4.06527
1449266_at	Mecp2	17257	chrX:71271930-71330951 (-) // 99.02 // qA7.3	76.9449	66.1645	62.4287	31.0554	26.0101	7.68545	9.99473	9.4547
1460246_at	Mecp2	17257	chrX:71271930-71330951 (-) // 99.02 // qA7.3	90.9024	71.6625	48.1038	21.3982	19.5574	10.6497	12.124	12.5959
1438538_at	Mecp2	17257	chrX:71326386-71327034 (-) // 97.74 // qA7.3	10.564	32.5553	9.56367	7.98031	6.26767	6.60267	6.90947	6.64833
1449567_at	Tktl1	83553	chrX:71422597-71453837 (+) // 99.88 // qA7.3	2448.59	2305	2479.69	968.016	609.347	119.622	41.7358	29.6322
1420065_at	Tktl1	83553	chrX:71453373-71453826 (-) // 95.91 // qA7.3	215.973	253.214	157.95	92.6331	59.1062	12.7928	12.2436	12.7121
1420064_s_at	Tktl1	83553	chrX:71453373-71453826 (+) // 95.91 // qA7.3	3150.48	3181.37	2865.62	1221.02	1067.06	186.555	61.9387	48.0878
1426677_at	Flna	192176	chrX:71468799-71481154 (-) // 97.84 // qA7.3	333.519	280.292	275.523	131.26	153.289	33.3557	27.6966	102.814
1417357_at	Emd	13726	chrX:71500065-71503226 (+) // 99.74 // qA7.3	435.621	483.582	405.229	358.04	131.826	14.7718	25.0802	102.289
1416207_at	Taz	66826	chrX:71528059-71535490 (+) // 95.4 // qA7.3	184.775	176.82	128.493	95.308	51.6137	12.8406	17.4725	14.6336
1453785_at	Taz	66826	chrX:71528088-71531577 (+) // 70.6 // qA7.3	5.57544	5.54385	5.42231	6.32389	5.59016	5.83252	5.55542	6.0885
1449622_s_at	Atp6ap1	54411	chrX:71549521-71550030 (+) // 97.27 // qA7.3	781.536	697.311	493.869	428.412	106.02	48.435	25.777	30.5873
1451070_at	Gdi1	14567	chrX:71550350-71557201 (+) // 94.18 // qA7.3	485.138	435.997	379.143	124.663	103.592	9.72816	14.2782	11.5324
1419516_at	Fam50a	108160	chrX:71558371-71565488 (+) // 92.59 // qA7.3	1157.84	1204.02	928.567	455.103	348.438	49.0366	25.0317	25.603
1420995_at	Plxna3	18846	chrX:71574437-71589954 (+) // 98.57 // qA7.3	6.78918	6.77572	10.151	7.11882	6.87223	7.08984	6.74418	7.02806
1420996_at	Plxna3	18846	chrX:71574437-71589954 (+) // 98.57 // qA7.3	14.7436	21.6453	24.3193	6.59263	7.59121	6.10126	7.18921	6.40502
1424538_at	Ubl4	27643	chrX:71611371-71614007 (-) // 83.68 // qA7.3	537.403	555.256	494.286	563.119	192.136	43.6031	33.6953	250.66
1424539_at	Ubl4	27643	chrX:71611371-71614007 (-) // 83.68 // qA7.3	156.604	105.582	106.909	21.7144	47.4012	13.5095	21.0858	39.3614
1451227_a_at	Slc10a3	214601	chrX:71614555-71618688 (-) // 99.07 // qA7.3	101.886	122.228	100.134	47.5462	45.055	31.1289	20.2932	88.7138
1428202_at	Fam3a	66294	chrX:71630057-71638579 (-) // 98.67 // qA7.3	12.3133	10.9054	10.7707	6.38371	10.1	10.7133	9.74365	10.4554
1448354_at	G6pdx	14381	chrX:71654824-71674529 (-) // 99.36 // qA7.3	142.121	152.562	132.77	62.4267	61.1027	12.7471	21.3837	53.4566
1421208_at	Ikbkg	16151	chrX:71669950-71694950 (+) // 99.35 // qA7.3	9.62593	7.68235	8.09583	7.55853	7.46923	7.58756	7.66734	7.61554
1421209_s_at	Ikbkg	16151	chrX:71669950-71694950 (+) // 99.35 // qA7.3	17.7801	16.0158	12.4392	8.14504	10.5161	5.97004	7.74023	8.9924
1435646_at	Ikbkg	16151	chrX:71694331-71696556 (+) // 85.3 // qA7.3	18.0474	15.9455	16.47	4.44265	4.61366	4.35744	4.16485	4.30915
1435647_at	Ikbkg	16151	chrX:71694331-71696556 (+) // 85.3 // qA7.3	5.82558	5.74907	6.61798	5.06507	5.04749	4.6655	4.5716	4.65233
1454690_at	Ikbkg	16151	chrX:71696243-71697073 (+) // 96.04 // qA7.3	32.9268	20.6404	21.8566	4.87903	9.83794	4.8292	4.4757	4.70014
1420357_s_at	Xlr3a /// Xlr3b /// Xlr3c	22445 /// 22446 /// 574437	chrX:71941362-71950247 (+) // 97.14 // qA7.3 /// chrX:70439515-70448267 (+) // 96.43 // qA7.3 /// chrX:72157731-72166492 (+) // 94.29 // qA7.3 /// chrX:70331633-70340414 (-) // 99.68 // qA7.3 /// chrX:70499878-70508784 (-) // 98.25 // qA7.3	1064.19	982.919	1045.42	452.567	386.223	76.7963	23.2541	12.995
1438015_at	Dkc1	245474	chrX:72341884-72355114 (+) // 89.31 // qA7.3	714.305	912.322	668.256	171.881	151.114	45.2213	20.5914	15.8391
1438016_at	Dkc1	245474	chrX:72341884-72355114 (+) // 89.31 // qA7.3	2398.68	2502.45	2052.14	769.953	574.482	111.364	51.5134	24.0809
1441788_s_at	Dkc1	245474	chrX:72354684-72355115 (+) // 100.0 // qA7.3	1263.65	1160.02	871.751	556.019	92.1328	90.4478	22.069	23.7826
1450919_at	Mpp1	17524	chrX:72355071-72376355 (-) // 99.53 // qA7.3	31.0539	22.3109	23.9492	12.5593	10.4479	7.96064	8.367	8.24672
1449558_at	F8	14069	chrX:72418146-72625380 (-) // 98.35 // qA7.3	4.94194	4.7542	4.96845	4.97362	4.70326	4.76764	4.64325	4.7359
1428316_a_at	Fundc2	67391	chrX:72632438-72642194 (+) // 82.45 // qA7.3	402.082	358.168	372.526	216.148	122.498	54.0439	22.0539	20.42
1455710_x_at	Mtcp1	17763	chrX:72650114-72661549 (-) // 99.53 // qA7.3	21.7255	21.7985	32.3192	12.794	12.589	4.8509	5.91108	4.74955
1449897_a_at	Mtcp1	17763	chrX:72650189-72661935 (-) // 98.26 // qA7.3	218.303	190.541	262.464	96.882	80.0835	16.8752	6.48749	10.839
1425755_at	Mtcp1	17763	chrX:72655782-72661882 (-) // 72.25 // qA7.3	6.85187	6.46588	6.7341	7.41764	6.63704	7.02002	6.65514	6.9987
1452128_a_at	Brcc3	210766	chrX:72662036-72696517 (+) // 71.93 // qA7.3	378.411	351.004	328.37	98.6656	149.443	46.9586	23.3409	11.1821
1437553_at	Brcc3	210766	chrX:72698469-72698860 (+) // 35.4 // qA7.3	13.2869	12.9048	13.5358	17.212	13.2341	14.6064	14.7927	19.2883
1421750_a_at	Vbp1	22327	chrX:72759691-72780262 (+) // 97.45 // qA7.3	3881.14	3220.08	2382.25	1332.27	483.66	137.649	93.9005	466.303
1435014_at	Rab39b	67790	chrX:72817383-72818632 (-) // 100.0 // qA7.3	6.50136	6.58524	6.29449	7.43077	6.68828	7.05062	6.65867	7.08549
1453417_at	4933407K13Rik	74396	chrX:72987152-73005802 (-) // 35.46 // qA7.3 /// chrX:72976356-72987386 (-) // 35.4 // qA7.3 /// chrX:72981429-72992247 (-) // 35.4 // qA7.3	8.9721	9.3625	8.586	10.3606	8.94106	9.0694	8.94252	35.1289
1423725_at	Pls3	102866	chrX:73030998-73119885 (-) // 97.5 // qA7.3	636.585	564.313	473.393	228.374	148.172	57.0724	44.5676	48.3487
1432326_at	1700042B14Rik	73347	chrX:73509649-73513077 (+) // 93.31 // qA7.3 /// chrX:151559459-151562955 (-) // 99.91 // qF3 /// chrX:151321347-151324810 (-) // 97.12 // qF3	10.8115	8.24897	24.6684	167.719	89.5101	12.1154	142.08	709.676
1422357_at	Magea6	17142	chrX:73592732-73593714 (+) // 91.0 // qA7.3 /// chrX:151358623-151359601 (-) // 100.0 // qF3 /// chrX:151383063-151384048 (-) // 97.03 // qF3 /// chrX:151420669-151421654 (-) // 97.03 // qF3 /// chrX:151462144-151463129 (-) // 97.03 // qF3 /// chrX:151523286-151524271 (-) // 96.93 // qF3 /// chrX:151487952-151488937 (-) // 96.42 // qF3	57.9837	45.9227	39.6841	4.35438	7.13755	4.30842	4.2624	4.26905
1431639_at	4930468A15Rik	74987	chrX:73827948-73848263 (-) // 99.8 // qA7.3	4.07692	4.07475	4.83837	27.9928	28.2576	9.02129	51.588	348.234
1434643_at	Tbl1x	21372	chrX:74756361-74908324 (+) // 97.98 // qA7.3	657.435	990.941	717.024	334.099	179.517	25.2007	11.0399	10.1899
1434644_at	Tbl1x	21372	chrX:74756361-74908324 (+) // 97.98 // qA7.3	71.9544	89.9393	54.1362	14.2078	10.4156	7.47876	6.85431	9.84032
1455042_at	---	---	chrX:74756361-74908324 (+) // 97.98 // qA7.3	989.039	956.902	818.562	277.047	233.465	47.4359	23.7278	22.4102
1441435_at	---	---	chrX:74763578-74763992 (+) // 58.31 // qA7.3	94.3307	247.436	115.127	27.1448	34.2282	39.4979	48.8337	35.5144
1446345_at	---	---	chrX:74766892-74767409 (+) // 55.14 // qA7.3	28.3667	59.8422	36.2074	9.3973	10.1256	5.7459	5.63606	7.8507
1446736_at	---	---	chrX:74801980-74802452 (+) // 75.97 // qA7.3	6.03881	7.9388	5.32367	5.28799	4.94117	5.16152	4.96882	5.14867
1424286_at	Prkx	19108	chrX:75006310-75041319 (-) // 93.57 // qA7.3	429.725	429.495	366.185	135.46	90.2023	22.4807	10.22	21.6092
1424287_at	Prkx	19108	chrX:75006310-75041319 (-) // 93.57 // qA7.3	59.5228	72.6599	54.6208	9.03992	9.18479	8.41938	7.18597	38.4006
1451299_at	Prkx	19108	chrX:75006310-75041319 (-) // 93.57 // qA7.3	231.429	236.716	166.585	68.8246	36.9055	7.95945	8.15267	10.615
1454100_at	4930480E11Rik	74910	chrX:75614981-75616467 (+) // 99.19 // qB	6.47236	6.48964	6.78338	7.46006	6.85059	7.09686	8.85063	81.3385
1445714_at	B930042K01Rik	320668	chrX:75819997-75821078 (-) // 39.74 // qB	5.55831	5.70317	5.45797	6.25046	5.74996	6.078	5.66005	5.96422
1431445_at	Fam47a	70864	chrX:75983101-75984710 (+) // 97.32 // qB	9.7575	8.57381	10.6083	70.2942	20.5037	16.7014	43.1385	344.796
1420514_at	---	---	chrX:78316031-78343289 (+) // 99.11 // qB	177.159	116.522	74.2036	53.9962	28.7635	29.1464	17.8352	23.7504
1449885_at	Tmem47	192216	chrX:78316031-78343289 (+) // 99.11 // qB	182.775	152.19	62.9026	7.3438	12.5063	6.32363	6.03726	6.28067
1446150_at	---	---	chrX:78334031-78334729 (+) // 100.0 // qB	6.0017	4.83387	4.99306	4.85269	4.75383	4.82445	4.67167	4.99587
1417307_at	Dmd	13405	chrX:80194208-82450389 (+) // 99.03 // qB	9.73993	8.52321	9.10205	5.43804	5.24237	5.31684	5.06103	5.26344
1448665_at	Dmd	13405	chrX:80194208-82450389 (+) // 99.03 // qB	68.498	62.1461	45.3211	23.4236	18.1826	16.8875	11.8949	14.0169
1420552_s_at	Tsga8	60600	chrX:80732013-80733263 (-) // 82.93 // qC1	321.541	171.231	481.841	4931.03	1586.31	614.508	1772.88	9471.18
1430320_at	Dmd	13405	chrX:82293640-82386077 (+) // 99.58 // qC1	6.51141	6.47239	6.54443	8.1363	6.58691	7.12433	6.56114	7.17504
1429793_at	1600014K23Rik	71996	chrX:82514833-82515627 (+) // 97.78 // qC1	9.91055	7.97278	11.0408	45.5813	21.0505	12.1153	46.4212	399.305
1428762_at	Map3k7ip3	66724	chrX:82876816-82879809 (+) // 99.4 // qC1	1453.45	1707.18	1522.12	647.94	414.661	59.7167	27.9356	19.8404
1422703_at	Gyk	14933	chrX:82947934-83021992 (-) // 98.57 // qC1	15.7749	6.38087	6.07388	6.45347	6.14549	6.3894	6.06959	6.31945
1422704_at	Gyk	14933	chrX:82947934-83021992 (-) // 98.57 // qC1	52.1903	59.5958	29.8959	29.8291	23.8987	28.7684	25.4921	27.9151
1449985_at	1700072E05Rik /// LOC100046978	100046978 /// 73495	chrX:83289537-83292654 (+) // 99.71 // qC1	6.02175	6.0454	5.99926	7.18522	7.67968	6.34639	11.7656	135.114
1417760_at	Nr0b1	11614	chrX:83437102-83441286 (+) // 98.69 // qC1	28.3018	20.2595	45.6084	21.1071	52.5105	19.0462	31.7018	17.3295
1420157_s_at	Abcf1	224742	chrX:83564233-83564578 (+) // 91.04 // qC1 /// chr17:36093761-36094108 (-) // 100.0 // qB1	1337.49	1656.75	1528.12	1505.84	1550	1991	1518.53	1234.38
1426758_s_at	Meg3	17263	chrX:86004810-86005658 (-) // 41.62 // qC1	7.35104	6.80369	6.7281	7.20317	7.0738	7.11767	7.00349	7.1815
1421566_at	Pet2	18630	chrX:86649218-86655043 (-) // 96.65 // qC1	214.737	181.571	202.588	139.926	33.2727	10.46	8.86591	48.5826
1453280_at	Mageb5 /// OTTMUSG00000017976	629542 /// 74271	chrX:88877532-88881010 (+) // 99.56 // qC2 /// chrX:89024882-89028357 (-) // 99.78 // qC2	17.2122	11.4887	29.0656	70.3828	53.5206	22.7843	99.1505	579.678
1429636_at	1700010D01Rik /// EG546347	546347 /// 76386	chrX:89735344-89736016 (+) // 99.6 // qC2	3640.24	308.572	658.66	1789.36	1412.48	419.188	1238.97	5524.9
1437988_x_at	1700003E24Rik	100042663	chrX:90428969-90429284 (+) // 97.52 // qC3 /// chrX:90401896-90402211 (+) // 97.52 // qC3 /// chrX:88820546-88820872 (-) // 93.19 // qC1	5850.91	613.779	836.859	1272.2	1445.62	460.442	1194.06	5224.88
1419397_at	Pola1	18968	chrX:90550080-90877494 (-) // 99.07 // qC3	116.666	130.754	147.195	31.6644	60.614	22.57	10.4683	10.6119
1426410_at	Pdk3	236900	chrX:91009951-91077513 (-) // 98.95 // qC3	2249.94	2288.88	2202.3	1445.03	588.439	124.108	167.466	951.297
1444038_at	AU015836	385493	chrX:91220129-91220808 (+) // 59.62 // qC3	116.069	133.515	141.156	82.062	71.9396	20.891	53.5435	55.0502
1419565_a_at	Zfx	22764	chrX:91319959-91368239 (-) // 98.23 // qC3	196.06	198.962	134.045	83.9165	72.3611	74.0707	23.8474	76.9161
1449512_a_at	Zfx	22764	chrX:91319959-91368239 (-) // 98.23 // qC3	16.7189	29.5138	12.6031	16.74	12.4246	14.1485	12.6788	14.912
1425972_a_at	Zfx	22764	chrX:91319970-91368454 (-) // 100.0 // qC3	208.127	291.999	248.375	42.2291	25.2707	8.65402	7.74145	11.1741
1439404_x_at	Zfa /// Zfx	22639 /// 22764	chrX:91326108-91326825 (-) // 73.04 // qC3	2.11765	2.11041	2.09827	2.14253	2.11162	2.13404	2.10693	2.1307
1438002_at	---	---	chrX:91344898-91345420 (-) // 78.14 // qC3	7.21763	7.33211	6.83642	7.88108	7.35911	7.79037	7.30396	9.88111
1421895_at	Eif2s3x /// LOC100048746	100048746 /// 26905	chrX:91435260-91457988 (-) // 73.91 // qC3	153.373	235.571	173.213	83.8418	69.3717	43.0279	53.3064	44.4021
1438247_at	Klhl15	236904	chrX:91481149-91499405 (+) // 94.5 // qC3	213.719	513.857	521.51	199.846	106.755	23.5721	12.9307	94.3882
1435818_at	Klhl15	236904	chrX:91522460-91523034 (+) // 94.86 // qC3	392.781	394.443	311.475	125.293	76.5501	22.593	11.0117	16.7079
1431809_at	4932442L08Rik	74432	chrX:91600389-91612116 (-) // 99.8 // qC3	1408.8	1681.71	1059.77	447.266	235.623	45.4831	33.4889	117.359
1450062_a_at	Maged1	94275	chrX:91780800-91787380 (-) // 94.1 // qC3	3059.15	3082.9	3257.42	1740.62	854.931	150.541	145.688	281.703
1418109_at	Gspt2	14853	chrX:91881415-91883901 (+) // 99.96 // qC3	370.787	431.583	353.105	101.171	86.226	17.3162	9.40366	14.0805
1455817_x_at	Zxdb	668166	chrX:91975143-91975523 (+) // 94.99 // qC3	8.32412	7.28667	7.9647	8.69722	7.13888	7.74923	7.1785	7.80599
1427985_at	Spin4	270624	chrX:92217842-92222021 (-) // 86.91 // qC3	10.7983	8.37355	5.43541	5.94685	5.73318	5.84595	5.94869	7.29321
1439565_at	Fam123b	72345	chrX:92615654-92616517 (-) // 99.54 // qC3	4.72547	4.23626	4.43678	5.61105	4.2669	4.32548	4.26823	4.31942
1453774_at	Fam123b	72345	chrX:92622706-92640163 (-) // 92.34 // qC3	29.8224	27.6072	26.4637	29.6313	27.3792	29.0311	34.4084	45.1876
1420346_at	Asb12	70392	chrX:92665537-92673471 (-) // 99.92 // qC3	17.3603	6.29584	6.64929	7.4434	8.22008	8.61261	9.03079	80.7905
1434729_at	Zc4h2	245522	chrX:92834534-92835231 (-) // 98.31 // qC3	11.3648	9.43252	12.4849	8.75255	7.45711	7.37646	7.16334	7.361
1452266_at	Las1l	76130	chrX:93130660-93152279 (-) // 92.93 // qC3	480.039	575.586	466.201	219.899	104.252	35.4965	14.7155	27.7991
1446743_at	Las1l	76130	chrX:93144847-93145368 (-) // 83.17 // qC3	4.87257	4.8058	4.63446	5.0561	4.78242	4.98563	4.78213	4.9516
1421814_at	Msn	17698	chrX:93291380-93363895 (+) // 95.9 // qC3	319.769	141.474	160.835	71.4959	116.425	63.6178	64.5054	59.1366
1440085_at	Eda2r	245527	chrX:94529175-94529807 (-) // 97.98 // qC3	7.19455	8.04619	7.11787	7.35527	7.18782	7.49769	7.25414	7.64369
1445782_at	---	---	chrX:94588054-94589046 (+) // 75.98 // qC3	6.19461	6.22847	5.96092	7.77316	6.47064	6.81706	6.33395	6.95063
1422982_at	Ar	11835	chrX:95345000-95512642 (+) // 97.74 // qC3	11.9621	6.15996	10.6663	7.20092	7.82552	7.13237	7.18896	13.5339
1455647_at	Ar	11835	chrX:95517026-95518558 (+) // 97.26 // qC3	21.873	11.7721	13.2894	13.904	13.13	13.1025	13.1413	20.9702
1419107_at	Ophn1	94190	chrX:95752847-96086120 (-) // 99.13 // qC3	167.254	172.619	174.354	92.5582	40.5487	9.01387	9.03775	43.1878
1419108_at	Ophn1	94190	chrX:95752847-96086120 (-) // 99.13 // qC3	159.179	293.039	255.539	91.503	57.4644	11.1863	10.3369	11.0554
1430024_at	Yipf6	77929	chrX:96132906-96139291 (+) // 84.26 // qC3	177.429	112.046	88.8676	98.8682	70.2744	29.8367	68.8085	229.944
1441485_at	Yipf6	77929	chrX:96136752-96137270 (+) // 75.62 // qC3	6.87477	8.26265	7.02348	7.23983	6.53528	6.96581	6.51023	7.48361
1455111_at	Yipf6	77929	chrX:96142418-96144355 (+) // 77.17 // qC3	537.017	596.513	367.159	88.1883	47.9146	10.09	10.0631	15.591
1427072_at	Stard8	236920	chrX:96265193-96270067 (+) // 96.53 // qC3	27.7105	12.8696	13.1963	8.96735	8.45203	6.26872	9.19812	10.42
1451591_a_at	Efnb1	13641	chrX:96331468-96344323 (+) // 98.84 // qC3	21.7255	15.988	19.3705	13.8497	13.4366	13.7089	12.4029	11.9322
1418285_at	Efnb1	13641	chrX:96331507-96344330 (+) // 98.28 // qC3	36.722	57.3753	31.9383	21.6767	13.846	12.1465	9.66095	10.631
1418286_a_at	Efnb1	13641	chrX:96331507-96344330 (+) // 98.28 // qC3	71.501	116.819	78.9005	34.2606	22.3383	22.615	38.4529	30.7321
1426448_at	Pja1	18744	chrX:96661106-96666064 (-) // 97.86 // qC3	33.1811	28.1249	36.0518	37.9445	22.4277	21.6845	18.7208	19.5926
1426449_a_at	Pja1	18744	chrX:96661106-96666064 (-) // 97.86 // qC3	194.663	102.636	101.273	105.645	72.6754	37.5329	54.6466	150.574
1452083_a_at	Pja1	18744	chrX:96661106-96666064 (-) // 97.86 // qC3	71.2608	87.3387	84.2952	47.9502	28.4982	26.6377	25.0703	33.3559
1460737_at	Igbp1	18518	chrX:97689683-97711464 (+) // 97.69 // qC3	23.0059	14.7394	14.4156	14.6883	15.344	15.6896	14.705	16.1183
1420000_s_at	Igbp1	18518	chrX:97701278-97711337 (+) // 96.77 // qC3	154.661	65.6407	59.7129	23.5257	59.539	19.577	25.9963	33.1533
1422276_at	P2ry4	57385	chrX:97788543-97790208 (-) // 99.93 // qC3	5.72092	5.75307	5.57013	5.97259	5.7711	6.03212	5.73816	5.92777
1441144_at	Arr3	170735	chrX:97813384-97813832 (+) // 100.0 // qC3	10.2652	10.3018	9.57191	11.4118	10.561	11.0564	11.1328	13.6841
1453518_at	Pdzd11	72621	chrX:97815086-97816250 (-) // 72.21 // qC3	5.45637	5.37288	5.29081	6.04981	5.44742	5.80447	7.95094	5.65602
1451269_at	Pdzd11	72621	chrX:97818218-97821249 (-) // 94.71 // qC3	144.764	133.173	137.557	39.6554	30.9032	8.22386	10.1431	9.21194
1447865_x_at	Pdzd11	72621	chrX:97818222-97818448 (-) // 94.25 // qC3	6.37851	6.39614	6.41509	6.90359	6.50657	6.95105	6.3888	7.1567
1450692_at	Kif4	16571	chrX:97821075-97922610 (+) // 99.96 // qC3	369.003	492.779	399.704	109.972	54.1365	12.4729	10.7106	15.7578
1416918_at	Dlg3	53310	chrX:97963090-98013749 (+) // 98.22 // qC3	49.4862	44.1201	32.2618	8.59606	8.43036	7.14775	7.07243	7.78783
1419729_at	Tex11	83558	chrX:98033986-98255006 (-) // 94.82 // qC3	3778.84	3715.32	2502.55	724.219	392.72	77.9355	36.5891	39.5392
1417022_at	Slc7a3	11989	chrX:98274550-98280707 (-) // 99.67 // qC3	8.6707	6.86586	7.13072	6.06408	6.14135	6.86503	6.27436	35.4554
1456892_at	D030036P13Rik	320105	chrX:98397408-98397848 (-) // 51.83 // qC3	7.25251	7.3982	8.05366	7.27036	6.73836	7.16365	7.84627	7.93202
1454807_a_at	Snx12	55988	chrX:98407297-98417880 (-) // 90.41 // qC3	480.783	718.893	631.147	257.265	224.189	36.1174	20.4206	11.4484
1421797_a_at	Snx12	55988	chrX:98407606-98417829 (-) // 99.84 // qC3	170.273	200.182	269.081	91.7984	87.2551	12.2075	7.53664	8.36235
1422149_at	Foxo4	54601	chrX:98449866-98455028 (+) // 99.2 // qC3	4.14391	4.06584	3.95794	4.34056	4.16304	4.33151	4.16468	4.33666
1456753_at	---	---	chrX:98455335-98456211 (+) // 98.98 // qD	57.5953	70.3841	74.4551	21.7243	51.5469	12.0425	16.7887	48.6746
1458481_at	Gm614 /// Il2rg	16186 /// 245536	chrX:98456711-98459331 (-) // 97.74 // qD	1020.34	88.4367	64.2923	108.758	107.268	26.2212	48.7697	239.526
1416295_a_at	Il2rg	16186	chrX:98459719-98463545 (-) // 89.99 // qD	11.9486	6.18561	5.84603	7.08564	6.22048	6.51223	6.12734	6.48245
1425585_at	Med12	59024	chrX:98469569-98492801 (+) // 91.77 // qD	818.785	1066.64	809.362	410.481	269.98	39.8533	38.6808	102.54
1459818_x_at	Zmym3	56364	chrX:98599723-98599990 (-) // 97.0 // qD	418.808	476.641	494.208	150.79	263.893	82.6956	69.3305	113.486
1417794_at	Zmym3	56364	chrX:98599723-98616188 (-) // 99.16 // qD	270.147	286.114	276.463	83.8894	155.353	20.0826	19.0542	65.3615
1455017_a_at	Zmym3	56364	chrX:98610154-98611656 (-) // 97.63 // qD	159.659	230.618	229.4	140.275	80.5945	26.6974	16.3689	18.2918
1415820_x_at	Nono	53610	chrX:98625021-98643928 (+) // 94.78 // qD	410.906	411.612	292.95	110.596	67.907	10.1246	11.3073	12.4357
1448103_s_at	Nono	53610	chrX:98625021-98643928 (+) // 94.78 // qD	2197.8	2155.58	1775.27	685.439	632.793	91.3232	227.945	238.979
1431239_at	Nono	53610	chrX:98625830-98637473 (+) // 73.0 // qD	10.569	22.3615	10.502	8.68157	7.23464	7.12725	6.42583	6.54663
1447160_at	Nono	53610	chrX:98643413-98643926 (+) // 92.98 // qD /// chrX:77778221-77778734 (-) // 92.2 // qB	6.33792	5.1579	5.77698	5.221	5.02974	5.22717	5.10896	5.15
1455513_at	Taf1	270627	chrX:98765162-98796368 (+) // 94.19 // qD	2480.2	2594.36	2189.86	381.051	542.274	97.6923	38.8372	36.0265
1425516_at	Ogt	108155	chrX:98835431-98878743 (+) // 98.91 // qD	275.771	220.259	156.375	77.5233	75.1492	31.6087	20.6034	23.7524
1425517_s_at	Ogt	108155	chrX:98835431-98878743 (+) // 98.91 // qD	99.1022	55.6992	57.621	10.0647	15.4885	6.51197	8.11047	9.51627
1451738_at	Ogt	108155	chrX:98835431-98878743 (+) // 98.91 // qD	177.96	135.075	106.636	84.0748	65.6143	10.0894	19.1985	55.5653
1436780_at	Ogt	108155	chrX:98839423-98848227 (+) // 92.93 // qD	26.734	30.3686	27.6924	11.3894	11.1777	5.90598	5.74677	6.55689
1460631_at	Ogt	108155	chrX:98878217-98879690 (+) // 84.5 // qD	731.204	770.616	658.189	239.207	208.117	35.1416	21.1913	43.2361
1449925_at	Cxcr3	12766	chrX:98926874-98929486 (-) // 99.32 // qD	6.51397	5.82042	5.8991	6.17509	6.0942	6.15035	5.96202	6.23497
1444797_at	8030474K03Rik	382231	chrX:98990948-98993886 (+) // 74.63 // qD	3257.5	4148.26	3020.04	2150.6	909.468	124.538	81.2156	258.406
1435419_at	Rgag4	331474	chrX:99261883-99262570 (-) // 97.43 // qD	5.40663	5.45853	5.26736	5.96844	5.50227	5.72545	5.88673	5.67462
1438732_at	RP23-448C18.1	100042480	chrX:99278755-99279956 (+) // 99.25 // qD	6.91959	17.8697	8.42393	7.27025	6.49598	7.34295	6.49023	6.81714
1456765_at	6430511F03	331475	chrX:99280468-99281567 (+) // 99.82 // qD	90.6122	192.508	157.57	20.2721	31.2331	11.2949	7.53976	5.84702
1455040_s_at	Nhsl2	621083	chrX:99286968-99287393 (+) // 97.0 // qD	27.4876	37.4736	27.0414	10.4873	8.90356	9.43411	8.34669	9.45605
1424766_at	Ercc6l	236930	chrX:99338271-99340062 (-) // 99.83 // qD	699.059	831.709	703.057	321.159	284.223	63.2391	28.5176	115.964
1449031_at	Cited1	12705	chrX:99442720-99447503 (-) // 94.75 // qD	2342.24	2326.76	2287.57	1318.62	493.289	88.1031	97.2851	41.0021
1435567_at	Phka1	18679	chrX:99709308-99709862 (-) // 100.0 // qD	52.9531	71.8382	49.9058	21.4314	25.2665	8.58893	15.0012	15.5421
1422743_at	Phka1	18679	chrX:99709818-99839585 (-) // 97.67 // qD	249.19	383.426	317.294	122.898	57.9236	5.48028	3.95397	4.19892
1422744_at	Phka1	18679	chrX:99709818-99839585 (-) // 97.67 // qD	10.1134	6.32017	10.028	6.65644	6.04989	6.29297	6.21445	6.30576
1440060_at	EG331480	331480	chrX:99877566-99878231 (+) // 99.1 // qD /// chrX:100127382-100128047 (-) // 100.0 // qD	8.28872	7.32777	9.68515	7.75947	7.24524	7.90734	8.25835	7.865
1456942_x_at	EG668339	668339	chrX:99902226-99902686 (-) // 93.99 // qD	116.216	115.438	211.103	596.461	161.075	66.3296	168.467	119.258
1449762_at	EG668339	668339	chrX:99902234-99902682 (+) // 87.46 // qD	5.12675	5.152	5.21649	5.6231	5.23614	5.48626	5.28411	5.54123
1437711_x_at	EG627245 /// EG665017 /// EG666231 /// EG668343 /// Odc1	18263 /// 627245 /// 665017 /// 666231 /// 668343	chrX:99919360-99919605 (-) // 75.24 // qD	1613.46	1064.1	1721.37	2213.57	3012.64	5714.67	4099.71	3691.65
1438761_a_at	EG627245 /// EG666231 /// EG668343 /// LOC677259 /// Odc1	18263 /// 627245 /// 666231 /// 668343 /// 677259	chrX:99919361-99919874 (-) // 83.67 // qD	1836.76	1289.89	1854.1	3078.49	3505.77	5899.85	5053	5280.23
1432116_at	1700031F05Rik	73300	chrX:99988117-99993727 (+) // 95.89 // qD /// chrX:99948826-99954367 (+) // 93.09 // qD /// chrX:99930026-99935516 (+) // 92.06 // qD /// chrX:100025014-100030689 (+) // 91.04 // qD /// chrX:100054525-100061692 (-) // 99.85 // qD	5.41023	4.38841	7.45829	3.98131	4.63074	4.03596	12.0281	6.60031
1453544_at	Dmrtc1c /// Dmrtc1c2	668357 /// 71083	chrX:99998301-100005289 (+) // 99.69 // qD /// chrX:100042969-100049955 (-) // 99.69 // qD	200.539	268.218	182.212	189.327	64.8907	10.7459	19.3103	17.4324
1429573_at	Dmrtc1a	70887	chrX:100098557-100104026 (-) // 99.84 // qD	62.971	54.7845	78.4825	121.066	39.0652	15.3263	49.591	100.677
1431360_s_at	Dmrtc1a	70887	chrX:100098841-100101897 (-) // 97.75 // qD	24.9517	14.4603	18.7607	27.608	16.1344	10.7821	17.297	31.1167
1436683_at	1700011M02Rik	75443	chrX:100104254-100104992 (+) // 99.27 // qD	76.6482	66.9293	129.4	440.648	124.761	39.6007	113.164	80.834
1441861_at	1700018G05Rik	69388	chrX:100123991-100124441 (+) // 98.68 // qD	38.7891	37.2574	58.3406	167.191	67.6849	27.1523	73.9087	62.6263
1447725_at	C030034E14Rik	77469	chrX:100211276-100211547 (+) // 100.0 // qD	20.1691	29.0291	38.5471	11.3032	11.9287	6.52007	6.02476	6.25799
1432276_at	4930519F16Rik	75106	chrX:100378310-100451953 (-) // 99.55 // qD	5.86604	5.92624	5.69985	21.4661	17.1409	6.54315	41.8877	269.56
1418046_at	Nap1l2	17954	chrX:100379397-100381979 (-) // 99.65 // qD	6.10515	6.11113	5.95076	6.82153	6.21705	6.65784	6.29547	6.72051
1427573_at	Chic1	12212	chrX:100551841-100585381 (+) // 99.92 // qD	95.5317	78.0413	69.644	9.85646	15.7215	5.7141	5.10873	4.21456
1439300_at	Chic1	12212	chrX:100586283-100587014 (+) // 97.97 // qD	71.1249	74.5048	23.2024	21.3624	12.194	7.82647	7.25829	7.77274
1440522_at	ENSMUSG00000073019	331484	chrX:100590759-100591430 (+) // 99.7 // qD	42.6323	15.6617	17.2369	7.10623	8.75773	5.52721	6.3274	6.40358
1420439_at	Tsx	22127	chrX:100609820-100619924 (+) // 99.75 // qD	116.433	114.319	189.488	181.049	167.195	59.7229	151.17	82.4717
1427263_at	Xist	213742	chrX:100655713-100678556 (-) // 95.01 // qD	6.93055	7.32661	6.934	8.08691	7.03098	7.22819	7.15474	7.48337
1436936_s_at	Xist	213742	chrX:100677542-100678588 (-) // 93.98 // qD	4.17904	4.30789	7.688	4.45269	5.19358	4.3303	4.5433	4.3397
1438838_at	B230206F22Rik	78878	chrX:100764844-100765429 (-) // 99.83 // qD	14.8224	11.9534	11.6994	14.0817	11.0426	11.9537	10.7339	12.605
1439305_at	---	---	chrX:100772965-100773674 (-) // 72.39 // qD	7.9839	8.93654	6.75107	6.60991	6.22701	6.45282	6.05963	6.73568
1432321_at	Zcchc13	75064	chrX:100825924-100827003 (+) // 99.81 // qD	682.369	49.8783	88.1546	245.701	195.02	48.033	186.044	940.641
1418446_at	Slc16a2	20502	chrX:100892752-101017298 (-) // 92.52 // qD	7.91851	8.93112	6.84061	7.31839	7.46297	5.92776	7.11526	8.35495
1417250_at	Rlim	19820	chrX:101152500-101156914 (-) // 92.22 // qD	380.19	364.827	277.03	91.1899	78.6559	11.9799	18.7042	12.4934
1439403_x_at	Rlim	19820	chrX:101152502-101152806 (-) // 93.13 // qD	67.567	68.5801	40.589	27.2096	20.6871	23.8106	20.7785	24.3683
1418730_at	Rlim	19820	chrX:101156467-101176615 (-) // 99.39 // qD	89.6359	108.092	96.9154	55.6233	60.1102	36.5123	57.572	298.926
1418731_at	Rlim	19820	chrX:101156467-101176615 (-) // 99.39 // qD	11.9619	11.7604	9.80382	15.3423	9.40186	10.5558	9.86133	11.3132
1440850_at	Rlim	19820	chrX:101173133-101173909 (-) // 81.75 // qD	86.244	128.786	80.3915	98.1881	69.2283	86.5322	75.8985	114.269
1440910_at	C77370	245555	chrX:101272771-101273705 (-) // 53.37 // qD	192.754	217.42	123.774	26.4515	5.68235	5.63632	5.30322	5.73176
1457046_s_at	C77370	245555	chrX:101281880-101283096 (-) // 98.13 // qD	58.3801	100.926	44.6347	38.3953	16.8269	10.1515	11.1857	19.0384
1419968_at	C77370	245555	chrX:101281881-101282455 (-) // 97.94 // qD	19.6601	27.4332	21.0661	17.893	14.3335	12.9173	15.4447	16.7932
1435006_s_at	Abcb7	11306	chrX:101475902-101478539 (-) // 87.47 // qD	245.448	283.226	203.16	50.8179	63.0517	14.0679	10.9638	11.0718
1419931_at	Abcb7	11306	chrX:101476000-101476624 (+) // 99.68 // qD	12.7478	19.6397	10.8443	10.2538	8.77084	9.40674	8.51867	9.38034
1427490_at	Abcb7	11306	chrX:101478782-101609185 (-) // 98.83 // qD	268.319	333.913	278.468	106.421	48.3622	13.8267	11.5355	10.7696
1435822_at	D830012I24Rik	320070	chrX:101705781-101706895 (+) // 62.15 // qD	9.08046	6.10432	6.51726	6.61876	6.10235	6.36566	6.05279	6.42533
1438893_at	5530601H04Rik	71445	chrX:102237611-102238014 (-) // 61.25 // qD	6.74075	7.26157	6.48496	7.06979	6.82626	7.49468	6.72132	7.18568
1436347_a_at	5530601H04Rik	71445	chrX:102239106-102265435 (-) // 67.15 // qD	67.6311	52.8374	50.485	16.9046	17.2663	7.4189	6.46876	7.12372
1422431_at	Magee1	107528	chrX:102316530-102319302 (+) // 99.86 // qD	4.5554	4.59571	4.74258	4.76368	4.53872	4.69087	4.51695	6.4972
1433537_at	Atrx	22589	chrX:102992735-102993644 (-) // 99.89 // qD	774.861	814.963	651.516	155.177	200.662	24.69	22.9125	16.606
1453734_at	Atrx	22589	chrX:102993154-102995719 (-) // 98.4 // qD	22.2195	29.7862	26.8135	13.7989	12.2972	13.4142	12.1089	13.484
1420946_at	Atrx	22589	chrX:102994813-103124711 (-) // 99.43 // qD	58.5499	79.3228	34.9116	7.08838	8.02317	6.2497	5.86355	6.36706
1420947_at	Atrx	22589	chrX:102994813-103124711 (-) // 99.43 // qD	269.558	494.101	174.462	76.1396	41.1761	9.06685	8.06212	7.85416
1420948_s_at	Atrx	22589	chrX:102994813-103124711 (-) // 99.43 // qD	16.2762	14.4798	13.282	7.71638	6.98065	6.70968	6.28266	5.63553
1450051_at	Atrx	22589	chrX:102994813-103124711 (-) // 99.43 // qD	126.572	207.861	55.5764	22.984	13.6852	8.22322	7.33986	7.82797
1441771_at	---	---	chrX:103045233-103045541 (-) // 67.47 // qD	21.9849	62.2718	18.1761	14.1693	8.66533	8.91732	8.66123	9.22736
1438750_at	Atrx	22589	chrX:103060790-103061608 (-) // 99.88 // qD	26.0084	14.6507	16.4816	11.6871	10.4037	11.4524	10.1	10.8334
1419886_at	DXErtd223e	52197	chrX:103068800-103069482 (-) // 93.17 // qD	9.50227	16.3851	10.4608	8.38288	7.85869	7.8238	7.57313	7.81315
1428624_at	2810482I07Rik	67243	chrX:103163404-103165367 (-) // 75.68 // qD	331.602	268.029	188.331	82.037	70.2949	34.6387	28.1722	30.6408
1419459_a_at	Magt1	67075	chrX:103165487-103207236 (-) // 88.83 // qD	180.612	175.399	93.3181	14.5015	15.7805	7.93661	9.13715	8.16404
1418774_a_at	Atp7a	11977	chrX:103222614-103320808 (+) // 97.56 // qD	357.291	591.635	412.449	148.809	120.881	25.3367	17.547	21.772
1436921_at	Atp7a	11977	chrX:103321257-103323499 (+) // 92.31 // qD	616.555	820.827	613.781	226.988	131.04	12.7245	7.72601	15.4348
1434960_at	Taf9b	407786	chrX:103402212-103403108 (-) // 100.0 // qD	2350.96	2471.14	1992.36	1034.64	528.709	101.686	35.2978	61.8774
1456326_at	Fndc3c1 /// LOC676436	333564 /// 676436	chrX:103615381-103616188 (-) // 79.17 // qD	15.6396	19.8401	46.9537	13.8409	16.9996	16.4922	12.8593	42.4068
1418944_at	Cysltr1	58861	chrX:103771855-103798998 (-) // 96.22 // qD	7.06412	5.15912	4.97441	5.53042	5.17375	5.45797	5.17329	5.4444
1452815_at	P2ry10	78826	chrX:104284572-104300312 (+) // 98.25 // qD	18.1138	9.94465	9.42702	13.193	9.84835	11.1705	10.2773	12.1322
1423608_at	Itm2a	16431	chrX:104592533-104598677 (-) // 95.55 // qD	89.862	44.4516	27.2354	15.6937	9.57755	6.37968	7.4627	19.6707
1451047_at	Itm2a	16431	chrX:104592533-104598677 (-) // 95.55 // qD	16.2775	5.95477	6.18107	5.389	4.49102	5.32442	5.06323	7.60312
1453874_at	4933401B06Rik	71011	chrX:104737920-104739143 (+) // 99.43 // qD	9.15113	7.71265	7.17779	12.1524	7.96993	8.86532	11.0967	83.0848
1438586_at	Tbx22	245572	chrX:104883640-104884319 (+) // 99.71 // qD	9.40222	9.25429	8.7871	12.5208	9.37288	10.5021	10.0062	13.2697
1453078_at	2610002M06Rik	67028	chrX:104978084-104980434 (-) // 78.48 // qD	6.32768	5.97955	5.86716	7.44883	6.0587	6.31735	6.01016	6.3951
1419690_at	2610002M06Rik	67028	chrX:104982603-105011630 (-) // 95.19 // qD	197.958	174.761	135.016	36.9398	37.6541	12.7894	11.9722	43.958
1445435_at	Gm732	213450	chrX:105141073-105141699 (-) // 98.56 // qD	9.06094	8.81483	8.5746	12.3644	9.21639	9.48943	15.5391	77.7004
1457811_at	---	---	chrX:105931276-105931729 (-) // 82.75 // qD	5.61497	6.8582	5.69754	5.9796	6.07557	5.94314	5.69514	5.81735
1439775_at	Brwd3	382236	chrX:105933422-105936951 (-) // 98.98 // qD	24.0163	21.1744	33.0604	12.7079	11.6614	9.39403	10.1856	13.9105
1440881_at	Brwd3	382236	chrX:105937546-105938619 (-) // 88.39 // qD	155.138	218.338	248.794	36.3425	141.616	90.8247	87.7195	93.8546
1441182_at	Brwd3	382236	chrX:105938781-105946164 (-) // 100.0 // qD	5.93102	4.70932	5.31935	5.11556	4.92175	5.01213	4.89189	5.54166
1440039_at	---	---	chrX:106017003-106017393 (-) // 56.56 // qD	5.14355	5.18697	5.09103	5.43411	5.18453	5.35896	5.14482	5.30991
1444678_at	2810403D21Rik	69964	chrX:106030034-106069951 (+) // 57.72 // qD	7.38751	7.43572	7.26032	8.81526	7.64749	8.28008	7.94326	8.39778
1433342_at	5730416F02Rik	70550	chrX:106196827-106197869 (+) // 97.73 // qD	10.7324	10.8512	10.4187	20.5641	11.6858	12.2905	11.0557	13.138
1418152_at	Nsbp1	50887	chrX:106199766-106208719 (-) // 98.72 // qD	296.699	256.652	391.264	26.1178	186.998	34.0623	33.6539	21.893
1421871_at	Sh3bgrl	56726	chrX:106290703-106357275 (+) // 94.63 // qD	28.4956	16.7056	13.8149	6.24739	6.00079	6.38479	5.82504	6.16561
1428107_at	Sh3bgrl	56726	chrX:106356680-106357810 (+) // 97.5 // qD	86.2533	28.8024	28.9977	22.0966	17.4186	7.11397	11.346	19.6405
1436997_x_at	Sh3bgrl	56726	chrX:106357516-106357809 (+) // 89.85 // qD	67.9945	33.3466	33.0402	8.10769	19.4555	5.52021	9.80315	13.3207
1441887_x_at	EG622976	622976	chrX:106395423-106395710 (+) // 98.96 // qD	15.349	8.92342	8.05428	11.2786	8.9016	9.836	9.05636	10.2264
1421591_at	Cylc1	67407	chrX:108316066-108318433 (+) // 99.71 // qE1	63.5621	21.0252	37.5163	73.8905	43.5843	44.7345	56.6885	309.028
1429759_at	Rps6ka6	67071	chrX:108501487-108530752 (-) // 99.85 // qE1	2236.29	2321.13	1304.87	567.761	138.199	23.5396	15.9363	14.7688
1429760_at	Rps6ka6	67071	chrX:108501487-108530752 (-) // 99.85 // qE1	6.73201	9.25294	5.86931	6.40294	5.60193	5.89711	5.45147	5.74448
1421700_at	Tex16	83556	chrX:109207128-109240934 (+) // 99.6 // qE1	777.247	1223.88	795.151	432.166	144.199	37.1082	29.2268	51.2543
1453533_at	4933403O08Rik	71030	chrX:109354064-109357461 (+) // 99.8 // qE1	27.8449	13.051	9.98851	11.6954	9.67817	9.58072	9.0335	53.2138
1418384_at	Apool	68117	chrX:109424966-109486363 (+) // 97.56 // qE1	170.819	123.09	150.097	16.5192	56.8603	11.4431	8.06678	12.1732
1429926_at	Apool	68117	chrX:109424989-109426113 (+) // 93.2 // qE1	3.68535	3.99092	4.47624	3.79941	3.72056	3.77787	3.68959	3.75255
1431573_at	Satl1	73809	chrX:109497913-109519431 (-) // 99.59 // qE1	595.712	56.1787	63.5791	98.614	154.519	46.2132	163.079	937.328
1454334_at	Zfp711	245595	chrX:109747414-109748671 (-) // 99.84 // qE1	6.24608	9.23632	6.42711	5.77809	5.39636	5.66373	5.35186	5.62709
1432750_at	Zfp711	245595	chrX:109747414-109748671 (+) // 99.84 // qE1	2074.7	2566.48	1768.44	604.572	357.777	74.5113	70.5997	373.184
1459877_x_at	Rnf185	193670	chrX:110068995-110069121 (+) // 56.25 // qE1	365.329	423.283	322.167	265.987	312.015	397.861	258.684	273.921
1439824_at	Chm	12662	chrX:110154200-110154892 (-) // 97.32 // qE1	243.339	204.491	201.378	71.1749	66.0846	44.4168	34.1633	43.0678
1448712_at	Chm	12662	chrX:110154783-110299124 (-) // 94.39 // qE1	45.0161	46.6921	38.4593	28.5056	11.5684	10.4397	9.57044	10.2895
1447156_at	---	---	chrX:110222914-110223306 (-) // 76.41 // qE1	24.4599	29.855	19.8438	9.76791	8.05378	6.66313	6.17264	7.82939
1458805_at	---	---	chrX:113109652-113110420 (+) // 89.81 // qE1	5.40793	5.47923	5.29221	5.81802	5.54591	5.82702	5.59747	5.82423
1453894_at	4933434C23Rik	71210	chrX:114823014-114824101 (+) // 99.45 // qE1 /// chrX:114982307-115000963 (-) // 90.28 // qE1	10.5297	9.56915	10.4277	14.789	15.4243	12.4658	27.6059	252.426
1427968_at	Tgif2lx /// Tgif2lx2	100039551 /// 245583	chrX:115540835-115541864 (+) // 98.47 // qE1 /// chrX:115593317-115594346 (-) // 98.56 // qE1	25.4426	10.7476	59.9049	204.719	158.24	78.3534	291.6	1297.1
1452640_at	3110007F17Rik	73061	chrX:120695307-120716100 (+) // 83.41 // qE3 /// chrX:122736136-122737164 (-) // 79.78 // qE3	6.31167	6.40413	6.10804	7.28365	6.7911	6.8694	11.962	59.3117
1432477_at	4930412D23Rik	73934	chrX:124255711-124271086 (-) // 99.51 // qE3	12.5687	11.2646	15.358	111.577	62.3255	10.1651	106.229	619.513
1432795_at	2310058F05Rik	71915	chrX:126534729-126535763 (-) // 96.17 // qE3	5.5909	5.59354	5.39646	7.23177	5.63852	6.03888	5.66422	6.34659
1427564_at	Diap2	54004	chrX:126608370-126995734 (+) // 98.35 // qE3	66.2245	75.6117	45.6313	10.6652	15.2797	9.25131	14.4026	12.9526
1442003_at	Diap2	54004	chrX:126999800-127000367 (+) // 40.85 // qE3	81.1411	77.9049	64.5679	29.1201	33.3369	13.4667	27.1809	23.2055
1455145_at	Pcdh19	279653	chrX:130117410-130119033 (-) // 85.42 // qE3	15.2576	22.0553	12.507	15.3973	8.59262	6.89589	8.43849	8.72768
1437360_at	Pcdh19	279653	chrX:130121674-130122948 (-) // 99.45 // qE3	38.9113	57.4932	59.7029	5.90618	5.86722	5.45708	5.90517	6.01297
1444422_at	Pcdh19	279653	chrX:130216630-130220168 (-) // 93.69 // qE3	5.92011	6.09514	8.52877	6.0534	5.38179	5.67676	5.35847	5.62365
1416872_at	Tspan6	56496	chrX:130425608-130432950 (-) // 96.03 // qE3	30.8343	24.1818	13.2563	8.22547	6.96068	6.78528	6.20546	6.74277
1448501_at	Tspan6	56496	chrX:130425608-130432950 (-) // 96.03 // qE3	2881.94	483.826	380.17	405.531	489.147	94.3905	263.751	1468.32
1417336_a_at	Sytl4	27359	chrX:130470924-130516322 (-) // 98.77 // qE3	6.08127	6.06976	6.72315	6.90276	6.13003	6.24864	7.52556	7.61666
1419644_at	Cstf2	108062	chrX:130593729-130621361 (+) // 99.06 // qE3	282.924	264.681	194.76	173.847	46.7616	24.6764	45.5832	253.705
1419645_at	Cstf2	108062	chrX:130593729-130621361 (+) // 99.06 // qE3	1302.47	1348.46	881.959	396.011	292.232	67.9699	30.7501	27.0705
1455523_at	Cstf2	108062	chrX:130609798-130610406 (+) // 64.8 // qE3	15.5663	26.0836	23.7929	8.91601	7.36871	7.11615	6.78622	7.5286
1431945_at	Arl13a	74448	chrX:130722039-130742567 (+) // 99.77 // qE3	73.1939	8.54101	6.90131	11.1034	11.1508	7.5571	16.6969	146.465
1433672_at	Trmt2b	215201	chrX:130757493-130758158 (-) // 59.02 // qE3	173.374	107.663	118.211	52.1189	37.2537	26.0342	19.5475	24.2811
1416710_at	Tmem35	67564	chrX:130829767-130840511 (+) // 96.17 // qE3	9.24054	8.89106	11.3807	10.616	9.99276	8.70071	10.3369	12.649
1436723_at	Cenpi	102920	chrX:130885962-130897181 (+) // 99.41 // qE3	516.944	647.403	494.301	227.811	109.639	10.2011	20.7303	116.023
1440452_at	Drp2	13497	chrX:130987342-130987941 (+) // 97.53 // qE3	20.2589	23.0962	30.6983	22.0204	26.0997	20.2739	19.7198	19.5319
1420433_at	Taf7l	74469	chrX:130994650-131011029 (-) // 98.68 // qE3	4518.01	4908.34	4720.97	1962.73	1759.92	286.846	162.893	262.884
1457385_at	---	---	chrX:131070733-131071589 (-) // 97.32 // qE3	7.50793	7.52591	7.27476	7.75147	7.13919	7.6792	7.42049	7.6483
1416807_at	EG624713 /// EG666243 /// EG667549 /// OTTMUSG00000005111 /// OTTMUSG00000009278 /// Rpl36a	19982 /// 624713 /// 665197 /// 665277 /// 666243 /// 667549	chrX:131120240-131122656 (+) // 94.02 // qE3	11671.2	11374.9	12038.5	6683.83	5151.62	800.366	398.844	406.311
1418248_at	Gla	11605	chrX:131123208-131135505 (-) // 75.64 // qE3	86.7708	107.815	89.6418	59.446	13.7786	7.11119	7.75683	8.39271
1427167_at	Armcx4	102910	chrX:131229368-131231292 (+) // 98.67 // qE3	57.6755	52.9763	74.8131	7.30805	36.6236	6.64637	6.55992	6.70357
1425914_a_at	Armcx1	78248	chrX:131252558-131256449 (+) // 93.54 // qE3	57.8973	53.9452	53.7238	27.0237	29.0554	16.0869	17.6899	22.3901
1415780_a_at	Armcx2	67416	chrX:131338680-131343525 (-) // 97.36 // qE3	105.198	59.3508	73.7235	33.0178	46.9315	9.00029	5.40387	9.03134
1437849_x_at	Armcx2	67416	chrX:131338685-131338919 (-) // 76.9 // qE3	138.508	147.748	114.462	16.8466	42.6748	64.1297	39.7016	42.4537
1456739_x_at	Armcx2	67416	chrX:131338685-131338978 (-) // 93.33 // qE3	362.811	320.173	416.026	124.785	207.324	45.4502	13.8342	15.6237
1420585_a_at	Nxf2	83454	chrX:131479069-131499293 (-) // 98.83 // qE3	3589.73	3598.81	2951.26	1471.74	911.5	138.093	58.5923	260.463
1435829_at	Zmat1	215693	chrX:131505899-131506643 (-) // 100.0 // qE3	350.683	318.155	170.14	49.4289	40.3959	11.8478	14.3967	14.6942
1440079_at	3632454L22Rik	320606	chrX:131557266-131557915 (-) // 99.54 // qE3	8.06655	8.11279	7.81277	10.1945	8.25623	8.86061	8.18284	9.10221
1449962_at	AV320801 /// EG331529 /// OTTMUSG00000018782 /// Pramel3	100040635 /// 331529 /// 331531 /// 83565	chrX:131836850-131847339 (+) // 99.25 // qF1 /// chrX:132029131-132039281 (+) // 98.73 // qF1 /// chrX:131907822-131917926 (+) // 98.21 // qF1 /// chrX:131968373-131978530 (+) // 98.21 // qF1 /// chrX:131702014-131712166 (-) // 98.81 // qF1	3354.36	3431.28	3655.03	1510.68	1034.48	294.613	243.098	1044.84
1427399_a_at	Nxf7	170722	chrX:132114085-132123519 (-) // 99.58 // qF1	6.54636	6.57206	6.31184	6.91598	6.62498	6.93605	6.5736	7.13591
1431851_at	Prame	75829	chrX:132147540-132162244 (-) // 94.05 // qF1	5.47251	4.46371	5.44576	5.64694	5.74144	4.42292	4.74548	60.0431
1453339_at	1700008I05Rik	71841	chrX:132189240-132228329 (-) // 99.61 // qF1	97.8599	9.90142	20.7101	75.4726	33.5679	16.2603	68.9503	572.701
1447007_at	1700008I05Rik	71841	chrX:132203853-132204624 (+) // 84.77 // qF1	11.206	11.0452	10.0841	13.5072	11.2235	17.7811	15.6402	15.7237
1432566_at	Tmsb15a	78478	chrX:132253205-132255214 (-) // 99.67 // qF1	4562.19	475.166	681.129	1524.54	750.77	375.281	785.821	4066.89
1424481_s_at	Armcx5	494468	chrX:132278960-132281863 (+) // 98.07 // qF1	111.288	100.824	109.199	48.1866	12.7324	6.89728	11.6699	9.78719
1441970_at	E430010N07Rik	399572	chrX:132299599-132300915 (+) // 88.89 // qF1	120.54	158.9	83.2103	65.4124	19.5177	7.69842	10.1443	16.2065
1424455_at	Gprasp1	67298	chrX:132333728-132338006 (+) // 99.19 // qF1	407.726	397.611	397.345	61.5044	153.597	28.7452	27.0886	25.482
1434073_at	Gprasp2	245607	chrX:132378575-132379266 (+) // 89.95 // qF1	33.0251	31.4002	33.5091	17.0656	13.422	8.77494	11.5813	10.2356
1428512_at	Bhlhb9	70237	chrX:132424218-132425617 (+) // 99.22 // qF1	1212.08	1012.09	794.084	222.191	169.098	32.5694	20.7641	11.6799
1428333_at	2900062L11Rik /// 6530401D17Rik	76219 /// 76976	chrX:132528375-132530030 (+) // 98.57 // qF1 /// chrX:132567922-132568657 (+) // 42.29 // qF1	115.3	112.04	147.53	21.7872	31.3228	10.6445	13.1061	12.5244
1451679_at	6530401D17Rik	76219	chrX:132567899-132569485 (+) // 97.9 // qF1 /// chrX:132528352-132529087 (+) // 45.11 // qF1	28.9879	34.3686	37.9903	17.2502	20.2434	4.46375	4.2683	4.59991
1417388_at	Bex2	12069	chrX:132601102-132602671 (-) // 96.85 // qF1	325.588	260.576	176.325	65.9231	46.1804	28.1605	18.9374	21.7578
1456035_at	Nxf3	245610	chrX:132606646-132607182 (-) // 91.0 // qF1	180.624	148.792	178.865	155.809	86.197	22.1142	70.25	51.4064
1428209_at	Bex4	406217	chrX:132673583-132674982 (+) // 95.96 // qF1	1125.46	1248.48	1394.13	595.628	523.24	101.489	102.303	63.9984
1418171_at	LOC100045031 /// Tceal8	100045031 /// 66684	chrX:132704605-132706881 (-) // 81.48 // qF1	123.747	63.7723	78.4472	32.7084	27.0952	6.92166	22.8768	17.1785
1448595_a_at	Bex1	19716	chrX:132748510-132749998 (-) // 93.76 // qF1	4040.6	4634.75	5327.53	1971.8	1670.23	470.669	93.858	59.3229
1435585_at	RP23-105O4.2	100040972	chrX:132760162-132760633 (+) // 95.33 // qF1	6.3735	6.57831	6.43768	7.25946	8.52004	7.36838	6.59352	7.05193
1451230_a_at	Wbp5	22381	chrX:132779633-132781675 (+) // 72.09 // qF1	2050.25	1344.96	906.529	753.386	365.018	75.6071	146.981	169.195
1428842_a_at	Ngfrap1	12070	chrX:132804874-132806675 (+) // 95.06 // qF1	724.338	721.954	744.59	349.799	407.73	130.83	95.3421	100.655
1459521_at	---	---	chrX:132936735-132976619 (-) // 40.55 // qF1	11.0009	10.7926	11.1322	16.8202	11.165	12.6439	11.8724	15.0474
1424634_at	Tceal1	237052	chrX:133242529-133244411 (+) // 98.83 // qF1	51.9359	29.6368	28.9194	33.3745	33.011	26.3226	36.6725	64.1668
1456743_x_at	EG433261 /// LOC674828 /// Morf4l2	433261 /// 56397 /// 674828	chrX:133267489-133267781 (-) // 93.22 // qF1	7384.19	6542.26	6166.35	2979.67	1956.43	389.621	410.233	1183.98
1438330_at	BC065397	436230	chrX:133300145-133337898 (+) // 86.48 // qF1	19.6089	21.7741	20.0286	27.8573	16.492	16.5867	16.0627	17.0269
1425467_a_at	Plp1	18823	chrX:133354968-133372872 (+) // 92.73 // qF1	4.95914	4.91519	4.99361	5.02498	4.9468	6.74174	4.95575	17.2873
1451718_at	Plp1	18823	chrX:133354968-133372872 (+) // 92.73 // qF1	221.795	158.184	145.653	57.9419	53.3802	35.0363	51.2167	156.248
1433791_at	Rab9b	319642	chrX:133392685-133393540 (-) // 95.92 // qF1	5.98109	6.16157	5.79912	8.17501	6.13893	6.58331	6.50616	6.85682
1454199_at	1700014N06Rik	69389	chrX:133461863-133462912 (+) // 99.05 // qF1	17.6624	12.931	7.4136	6.33644	5.05828	5.40365	5.10689	6.00169
1455213_at	LOC100034363 /// Tmsb15b1-Tmsb15b2	100034363 /// 399591	chrX:133489530-133511408 (-) // 99.51 // qF1	1138.77	983.277	1162.1	871.441	291.273	151.085	236.166	1155.05
1459914_at	Mcart6	67062	chrX:133515815-133516435 (-) // 69.33 // qF1	11.1441	6.75639	7.87151	5.79315	5.67343	5.73316	7.07465	4.78142
1425293_a_at	Zcchc18	66995	chrX:133527740-133530640 (+) // 71.33 // qF1	14.5403	13.555	11.3902	11.2292	9.51408	9.4866	9.70486	9.43855
1440046_at	BC031748	245622	chrX:133611350-133612027 (+) // 99.41 // qF1	13.7152	20.5486	8.15693	6.54361	5.58337	6.82737	6.22994	6.71274
1439059_at	BC031748	245622	chrX:133612149-133614097 (+) // 63.47 // qF1	383.922	413.229	295.072	87.6785	17.9042	15.8052	10.1018	11.8999
1420602_a_at	Esx1	13984	chrX:133649903-133654710 (-) // 99.94 // qF1	336.647	317.855	200.255	134.656	47.0316	12.3418	21.1538	36.2045
1431531_at	1700025D03Rik	67944	chrX:134742703-134743391 (-) // 99.85 // qF1	555.252	66.3076	58.6986	137.011	85.4893	46.2229	79.1513	490.243
1446875_at	---	---	chrX:135064006-135064222 (+) // 36.42 // qF1	4.65314	4.70047	4.5712	5.03297	4.74396	5.02637	5.33364	4.88717
1450079_at	Nrk	27206	chrX:135448973-135543651 (+) // 99.79 // qF1	212.649	41.5043	58.795	17.2698	26.7731	5.51877	11.0242	19.4814
1436399_s_at	Nrk	27206	chrX:135543775-135545070 (+) // 77.61 // qF1	17.1436	6.96411	11.4405	6.01803	6.09428	6.87547	6.7962	8.98231
1431503_at	4930513O06Rik	75125	chrX:135620781-135627944 (+) // 99.75 // qF1	8.65226	7.99406	10.6044	22.4566	18.6436	9.22917	30.3444	218.621
1454210_at	4933428M09Rik	71248	chrX:135713766-135715550 (+) // 99.71 // qF1	9.99055	8.35736	11.4702	13.0429	27.0038	21.4379	75.0082	467.229
1455238_at	Mum1l1	245631	chrX:135772121-135772798 (+) // 87.93 // qF1	574.231	609.297	612.975	314.262	226.086	49.6717	74.1754	199.593
1460226_at	Trap1a	22037	chrX:135868221-135872707 (+) // 100.0 // qF1	2111.28	1678.17	1056.49	644.948	225.921	49.0863	46.1069	81.7919
1418318_at	Rnf128	66889	chrX:136145158-136207908 (+) // 99.13 // qF1	618.391	656.47	451.973	248.407	46.091	8.81964	9.2393	13.1016
1449036_at	Rnf128	66889	chrX:136145158-136207908 (+) // 99.13 // qF1	1020.01	870.352	694.535	106.332	90.9869	30.4602	29.1136	30.4127
1430133_at	Tbc1d8b	245638	chrX:136286370-136288757 (+) // 89.0 // qF1	396.44	344.296	244.437	110.702	46.077	8.92816	10.732	6.51294
1434436_at	Morc4	75746	chrX:136356173-136369049 (-) // 99.21 // qF1	145.818	124.561	86.1899	8.07244	9.74571	7.52981	7.28338	8.94775
1456027_at	Rbm41	237073	chrX:136476076-136477604 (-) // 67.25 // qF1	4.9341	5.21487	5.00031	4.95089	4.71823	4.83981	4.6948	4.80283
1446506_at	Frmpd3	245643	chrX:136928428-136929076 (+) // 98.32 // qF1	5.10842	9.9611	5.12129	5.74211	5.16392	5.48081	5.15739	5.37588
1441363_at	Frmpd3	245643	chrX:136965338-136970006 (+) // 100.0 // qF1	6.326	10.1979	9.011	4.85041	4.65439	4.77745	4.54032	4.74934
1416052_at	Prps1	19139	chrX:136991147-137010679 (+) // 98.25 // qF1	1221.45	1059.31	602.253	321.992	81.8233	11.8466	25.8472	110.364
1448192_s_at	AU021838 /// Prps1	19139 /// 328099	chrX:136991147-137010679 (+) // 98.25 // qF1	894.321	644.891	677.736	282.233	267.647	155.547	432.989	1014.25
1420772_a_at	Tsc22d3	14605	chrX:137074052-137077710 (-) // 94.59 // qF1	2312.85	1981.78	2740.73	954.518	803.57	92.0614	27.9645	20.6228
1425557_x_at	Tsc22d3	14605	chrX:137074066-137077724 (-) // 82.9 // qF1	26.3763	41.2752	29.9334	29.5947	31.7841	27.7712	25.1137	17.2848
1425281_a_at	Tsc22d3	14605	chrX:137074800-137133101 (-) // 93.85 // qF1	3100.8	3262.31	3805.91	1488.91	1169.51	197.88	68.8339	56.3402
1444365_at	---	---	chrX:137086122-137086967 (-) // 99.18 // qF1	3.70093	3.76559	3.86642	3.86729	3.74779	3.82132	3.72942	3.93776
1422216_at	Mid2	23947	chrX:137199494-137302251 (+) // 92.34 // qF1	5.1317	6.59324	4.5102	4.58728	4.45622	4.56017	4.36479	4.49084
1450537_at	Mid2	23947	chrX:137199494-137302251 (+) // 92.34 // qF1	21.3266	31.1432	16.2831	7.83	6.20561	6.95597	6.11076	7.05613
1450555_at	Tex13	83555	chrX:137343377-137347972 (-) // 74.44 // qF1	7141.13	6716.58	4685.93	1633.56	667.777	176.41	79.7836	86.3962
1432159_a_at	Tex13	83555	chrX:137343806-137345226 (-) // 87.01 // qF1	1527.69	1897.91	921.327	665.513	110.958	29.8702	18.9267	28.039
1430553_at	Vsig1	78789	chrX:137442146-137474011 (+) // 98.23 // qF1	5.62164	5.66118	5.70317	6.11311	5.72535	5.92592	6.08403	5.9883
1436559_a_at	Psmd10	53380	chrX:137483478-137491218 (-) // 98.34 // qF1	411.407	348.232	468.849	235.64	180.258	26.5507	84.8097	495.909
1434662_at	Atg4a	666468	chrX:137598076-137598807 (+) // 100.0 // qF1	52.2729	48.9706	39.1886	22.1246	10.3519	4.65063	4.55983	6.06622
1425475_at	Col4a5	12830	chrX:137909933-138123778 (+) // 99.13 // qF2	7.75913	5.64698	5.81067	5.75946	6.76927	5.95665	7.32314	8.57287
1425476_at	Col4a5	12830	chrX:137909933-138123778 (+) // 99.13 // qF2	41.1175	10.8047	10.6301	12.2019	9.14173	7.73563	8.99318	10.4076
1441429_at	Irs4	16370	chrX:138145540-138146261 (-) // 99.86 // qF2	15.7754	6.76005	9.46679	6.05497	7.15693	5.33201	6.0238	22.0418
1456599_at	Nxt2	237082	chrX:138673393-138674237 (+) // 94.4 // qF2	148.554	111.347	72.7062	55.9891	12.4343	8.86633	8.28275	47.526
1433531_at	Acsl4	50790	chrX:138752531-138753685 (-) // 92.4 // qF2	217.306	187.261	196.831	47.6904	52.1775	17.5918	35.6291	26.39
1451828_a_at	Acsl4	50790	chrX:138755177-138825078 (-) // 99.55 // qF2	254.199	195.602	114.55	30.4568	19.849	7.30648	5.44224	7.91255
1433854_at	Tmem164	209497	chrX:139269949-139272918 (+) // 97.62 // qF2	12.4405	20.3113	19.997	10.575	9.33633	9.1194	8.27891	9.46362
1454741_s_at	Tmem164	209497	chrX:139269949-139272918 (+) // 97.62 // qF2	20.2954	12.4814	24.1192	9.56862	15.3668	9.11762	8.59619	9.07537
1430697_at	Ammecr1	56068	chrX:139287928-139289449 (-) // 95.9 // qF2	223.81	307.771	150.866	21.1643	20.0764	12.7973	5.34503	5.62582
1450546_at	Ammecr1	56068	chrX:139289312-139401271 (-) // 99.34 // qF2	6.65074	6.83942	6.30042	8.08676	6.755	7.11211	6.69818	7.26264
1456722_at	Chrdl1	83453	chrX:139720253-139720664 (-) // 92.15 // qF2	22.2712	24.4636	27.276	13.2226	16.3033	11.1448	10.8847	12.449
1424945_at	Chrdl1	83453	chrX:139722040-139824628 (-) // 94.79 // qF2	13.7755	7.16319	11.5206	6.96068	8.01737	6.03469	6.43826	6.86622
1417923_at	Pak3	18481	chrX:140100287-140227805 (+) // 99.56 // qF2	7.7332	7.92438	7.67962	9.856	8.11609	7.29953	8.79007	21.3994
1437318_at	Pak3	18481	chrX:140227801-140229021 (+) // 98.07 // qF2	6.97897	7.05959	7.84086	7.6656	7.20833	7.4718	7.13038	9.21631
1435486_at	Pak3	18481	chrX:140231283-140232339 (+) // 99.81 // qF2	5.98024	6.23235	6.48456	6.87941	6.09715	6.13941	6.10705	6.92824
1450429_at	Capn6	12338	chrX:140236778-140261935 (-) // 97.22 // qF2	10.7764	11.4826	15.3301	13.1116	11.6263	10.7289	15.4255	14.6781
1418681_at	Alg13	67574	chrX:140752559-140759743 (+) // 99.81 // qF2	48.577	49.5333	38.0255	10.735	12.2537	15.0815	12.2641	12.2146
1422048_at	Trpc5	22067	chrX:140816213-141122723 (-) // 99.93 // qF2	3.45949	3.4931	3.40429	3.57976	3.49552	3.60809	3.48053	3.56742
1459367_at	---	---	chrX:141088458-141089109 (+) // 99.85 // qF2	6.76128	6.98899	6.61639	7.93308	6.92128	7.43802	6.79138	7.28194
1454890_at	Amot	27494	chrX:141880965-141883551 (-) // 97.61 // qF2	162.713	152.106	230.509	29.1914	152.051	20.9107	35.3957	21.72
1425907_s_at	Amot	27494	chrX:141884487-141921589 (-) // 97.07 // qF2	5.79376	5.84213	5.80715	6.02749	5.68464	6.03877	5.87484	6.23492
1422177_at	Il13ra2	16165	chrX:143818020-143838362 (-) // 97.19 // qF2	5.58209	8.18989	5.5251	6.13696	5.782	6.005	5.87447	5.98825
1436877_at	Lrch2	210297	chrX:143904920-143905890 (-) // 97.68 // qF2	16.4789	9.41746	9.38086	10.3222	8.06733	8.11475	7.73209	8.83013
1427346_at	Luzp4 /// Ott /// OTTMUSG00000019001 /// OTTMUSG00000019138 /// OTTMUSG00000019145	18422 /// 382243 /// 434863 /// 434864 /// 434865	chrX:145532494-145572695 (+) // 99.46 // qF3 /// chrX:145882159-145922327 (+) // 99.46 // qF3 /// chrX:145522857-145739546 (+) // 99.46 // qF3 /// chrX:144615266-144789273 (+) // 99.41 // qF2 /// chrX:144427535-144467717 (+) // 99.31 // qF2 /// chrX:146219015-146261237 (+) // 99.17 // qF3 /// chrX:144749072-144955989 (+) // 99.26 // qF2 /// chrX:145098140-145138392 (+) // 98.92 // qF3 /// chrX:14…	10698.5	8702.82	8344.17	4618.22	3021.84	626.242	575.514	1089.17
1428930_at	Tmem29	382245	chrX:146843122-146893683 (-) // 99.24 // qF3	139.542	167.545	250.318	92.7852	64.9424	18.135	12.804	9.76838
1424322_at	Apex2	77622	chrX:147006047-147024387 (-) // 98.02 // qF3	89.4605	54.0615	75.2263	48.0271	44.8739	10.6189	8.92593	14.3244
1427213_at	Pfkfb1	18639	chrX:147069065-147078420 (+) // 95.75 // qF3	38.6626	26.4568	29.4745	23.8941	22.7559	14.6356	14.7682	72.1233
1421201_a_at	Tro	56191	chrX:147079843-147090473 (-) // 99.85 // qF3	137.853	170.429	136.392	111.664	37.7152	21.0526	12.6217	13.16
1426016_a_at	Tro	56191	chrX:147079843-147091942 (-) // 96.14 // qF3	63.4732	63.0872	91.9304	53.0567	44.1924	56.9824	47.3448	32.401
1426306_a_at	LOC100046560 /// Maged2	100046560 /// 80884	chrX:147241252-147247504 (-) // 80.42 // qF3	109.761	83.0352	69.1714	50.9521	41.1131	29.4811	36.3441	36.0267
1444891_at	---	---	chrX:147337078-147337957 (+) // 91.95 // qF3	6.1204	6.20916	6.02718	10.1449	6.42094	6.60796	7.93017	6.88648
1441686_at	---	---	chrX:147440721-147441291 (-) // 99.3 // qF3	6.34151	6.6824	6.07738	7.60112	6.50587	6.95625	6.58266	7.75547
1416865_at	Fgd1	14163	chrX:147481775-147524069 (+) // 96.23 // qF3	169.185	209.932	243.713	79.0363	110.528	26.1901	15.8124	13.2561
1435170_at	Tsr2	69499	chrX:147521637-147522745 (-) // 92.85 // qF3	34.8303	29.8932	24.6227	7.49023	6.45463	6.26537	6.55837	6.70069
1437369_at	Fgd1	14163	chrX:147523711-147524229 (+) // 76.6 // qF3	10.491	14.9325	15.4284	10.2024	9.00275	8.30921	7.80017	8.31176
1426939_at	Tsr2	69499	chrX:147524023-147531061 (-) // 98.15 // qF3	738.309	678.263	551.798	295.619	166.548	28.7908	20.9324	17.3279
1443924_at	Wnk3	279561	chrX:147754058-147754735 (+) // 99.26 // qF3	43.9815	46.4671	101.247	67.8217	75.9085	42.7887	46.6466	64.5639
1456063_at	Fam120c	207375	chrX:147907553-147908681 (+) // 95.95 // qF3	103.777	55.2084	35.5946	5.20037	5.47785	5.01074	4.74905	5.09806
1439132_at	Phf8	320595	chrX:148032442-148064786 (+) // 98.92 // qF3	14.075	16.2288	14.1497	13.3477	11.3137	12.739	11.2009	12.8896
1459392_at	Phf8	320595	chrX:148059732-148060116 (+) // 58.6 // qF3	8.39872	29.2543	8.06388	7.36539	6.56675	6.70449	6.20041	13.3652
1460398_at	Phf8	320595	chrX:148064360-148068402 (+) // 99.01 // qF3	412.042	358.078	293.135	65.2474	75.6626	8.18952	28.3215	46.0718
1443649_at	---	---	chrX:148250102-148250547 (+) // 99.55 // qF3	174.87	286.485	177.316	138.614	62.6456	16.9003	31.0178	50.2269
1444279_at	Huwe1	59026	chrX:148298447-148306743 (+) // 99.53 // qF3	28.5659	67.2581	16.8258	7.39774	6.20395	5.62465	6.14575	6.13225
1448056_at	Huwe1	59026	chrX:148344336-148345154 (+) // 98.55 // qF3	6.93643	21.7849	6.69646	6.22913	6.18237	6.22519	5.83964	6.17709
1415703_at	Huwe1	59026	chrX:148351680-148369960 (+) // 95.33 // qF3	2984.38	3572.39	3260.16	1334.63	1011.24	120.955	58.8539	185.209
1424949_at	Huwe1	59026	chrX:148351680-148369960 (+) // 95.33 // qF3	8.20043	11.7214	12.0679	7.09182	6.42579	6.35656	6.09603	6.56286
1448286_at	Hsd17b10	15108	chrX:148436430-148438985 (+) // 86.7 // qF3	520.614	383.986	313.847	173.338	96.7091	22.7327	12.1556	9.61443
1438391_x_at	Hsd17b10	15108	chrX:148438744-148438974 (+) // 81.08 // qF3	207.99	158.946	113.569	44.5634	33.1364	9.90005	9.30404	11.6298
1449914_at	Ribc1	66611	chrX:148439124-148450853 (-) // 100.0 // qF3	206.414	166.539	129.46	426.579	128.029	58.6523	204.348	1519.45
1417830_at	Smc1a	24061	chrX:148450970-148496516 (+) // 95.84 // qF3	522.75	486.919	277.27	89.1916	88.7185	23.9148	17.3817	15.1401
1417831_at	Smc1a	24061	chrX:148450970-148496516 (+) // 95.84 // qF3	123.987	141.66	42.2133	44.0016	11.3234	9.29422	9.26173	11.0087
1448063_at	Iqsec2	245666	chrX:148659364-148659778 (+) // 95.17 // qF3	9.06877	10.8537	6.61484	6.05953	5.99016	6.27298	6.43933	6.33124
1426497_at	Kdm5c	20591	chrX:148667784-148708632 (+) // 97.56 // qF3	19.6421	20.1601	20.9515	22.2428	19.8895	20.7721	20.1901	21.9043
1440123_at	---	---	chrX:148699366-148700273 (+) // 69.93 // qF3	8.05178	7.28833	9.58367	8.66237	7.09029	7.44622	6.93886	7.68354
1444157_a_at	Kdm5c	20591	chrX:148708383-148708873 (+) // 66.71 // qF3	24.5876	20.6464	19.0904	58.9003	11.0829	8.27943	11.1581	59.2081
1444158_at	Kdm5c	20591	chrX:148708383-148708873 (+) // 66.71 // qF3	35.7617	29.9377	29.1264	31.5616	24.407	30.6872	28.0584	65.8658
1435348_at	D930009K15Rik	399585	chrX:148712508-148713640 (+) // 46.19 // qF3	8.04355	8.03466	7.33225	8.07521	7.10263	7.55261	7.09737	7.5157
1441816_at	2900056M20Rik	72997	chrX:148749759-148750040 (-) // 76.57 // qF3	26.1176	28.1729	23.0386	21.8296	15.5488	16.273	14.5874	17.2268
1434849_at	Tspyl2	52808	chrX:148771387-148773778 (-) // 99.43 // qF3	103.508	78.4741	55.7755	30.2519	40.3495	14.162	21.6634	23.5973
1433992_at	Shroom2	110380	chrX:149044532-149046561 (-) // 86.62 // qF3	256.556	319.871	265.908	69.4819	80.2622	7.79054	7.96029	8.07511
1442046_at	Shroom2	110380	chrX:149046609-149048137 (-) // 100.0 // qF3	44.75	38.8207	27.0815	6.13685	5.19871	6.05604	5.87446	6.05225
1459570_at	---	---	chrX:149233941-149234252 (+) // 49.63 // qF3	9.18829	9.04707	8.35022	11.3679	9.41204	10.0201	9.21854	10.5389
1435593_x_at	Rps7	20115	chrX:149344029-149344683 (-) // 84.14 // qF3	31509.4	28756.7	34226.7	27672.7	26812.5	30410.9	24728.8	21703.3
1455364_a_at	EG640050 /// Rps7	20115 /// 640050	chrX:149344029-149344683 (-) // 84.14 // qF3	17104.5	15814.8	18446.6	15143.4	16324.4	15029.1	13600.9	10668.6
1422498_at	Mageh1	75625	chrX:149470708-149472081 (-) // 97.23 // qF3	18.0635	11.693	11.3349	12.5928	11.0268	12.3204	10.1218	13.5469
1450021_at	Ubqln2	54609	chrX:149932718-149936079 (+) // 94.63 // qF3	1201.65	1229.44	1226.86	320.261	350.218	65.8003	69.2278	61.9096
1456192_x_at	Cypt3	69361	chrX:149993638-149993978 (+) // 90.93 // qF3	1041.88	87.5899	208.046	937.655	379.657	166.34	416.261	2257.39
1430538_at	2210013O21Rik	70123	chrX:150158096-150175958 (+) // 67.83 // qF3	232.087	145.767	97.9386	67.8683	24.1155	4.77434	6.31937	5.78662
1455297_at	Spin2	278240	chrX:150266863-150268796 (+) // 99.85 // qF3	19.2305	15.9912	14.4776	21.4075	10.5264	7.32568	11.1181	11.4264
1430624_at	4921511M17Rik /// EG434879 /// LOC635580 /// OTTMUSG00000019256	434879 /// 625713 /// 635580 /// 78092	chrX:150436131-150447183 (-) // 86.43 // qF3 /// chrX:150457321-150468370 (-) // 86.43 // qF3 /// chrX:150478527-150489582 (-) // 86.34 // qF3 /// chrX:150544174-150555228 (-) // 86.34 // qF3 /// chrX:150499734-150591430 (-) // 85.81 // qF3 /// chrX:150565379-150569961 (-) // 84.58 // qF3 /// chrX:150514106-150590134 (-) // 78.59 // qF3 /// chrX:150587110-150587916 (-) // 69.78 // qF3	9.46197	7.05599	10.6303	48.9306	13.3649	12.8952	49.0891	208.475
1421676_at	4930542N07Rik	75185	chrX:150916544-150919225 (+) // 99.69 // qF3	7.16776	7.17561	6.86858	14.8881	8.76734	9.65735	47.7498	322.09
1432433_at	4930524N10Rik	75071	chrX:151069558-151073680 (+) // 92.08 // qF3 /// chrX:150671704-150777935 (-) // 99.67 // qF3 /// chrX:151009780-151013903 (-) // 92.95 // qF3	6.89681	5.69768	8.7814	69.9055	54.0321	27.6962	111.769	658.12
1450542_s_at	Magea1 /// Magea2 /// Magea3 /// Magea5 /// Magea6 /// Magea8	17137 /// 17138 /// 17139 /// 17141 /// 17142 /// 17144	chrX:151383085-151467833 (-) // 99.48 // qF3 /// chrX:151462166-151497671 (-) // 98.1 // qF3 /// chrX:151523308-151525363 (-) // 95.24 // qF3 /// chrX:151358645-151372173 (-) // 96.02 // qF3 /// chrX:151420691-151422745 (-) // 94.11 // qF3 /// chrX:151487974-151489002 (-) // 86.75 // qF3	332.396	267.849	363.802	105.688	98.3811	26.0304	11.65	17.5615
1422325_at	Magea5	17141	chrX:151487603-151496096 (-) // 100.0 // qF3 /// chrX:151420315-151428801 (-) // 96.74 // qF3 /// chrX:151382710-151466227 (-) // 95.59 // qF3 /// chrX:151522940-151527378 (-) // 95.01 // qF3 /// chrX:151358334-151391962 (-) // 91.62 // qF3	386.715	426.228	445.048	175.182	107.645	23.0787	12.4134	9.98303
1456436_x_at	Rps20	67427	chrX:151585477-151585784 (-) // 78.96 // qF3	32315.4	28578.1	29248.3	27188.2	28325.4	33788.2	26868.4	25644
1456373_x_at	Rps20	67427	chrX:151585480-151585785 (-) // 86.11 // qF3	30557.1	26488.4	27056.1	25481.6	22361.4	29921.6	21990.4	21687.7
1432919_at	4921511E18Rik	70879	chrX:151735293-151737233 (-) // 97.88 // qF3	16.8278	17.2766	12.6476	12.0382	9.6702	10.5911	10.0771	11.9256
1416166_a_at	Prdx4	53381	chrX:151758460-151773001 (-) // 91.95 // qF3	1696.19	1488.7	1241.62	496.05	246.71	157.627	116.958	372.261
1416167_at	Prdx4	53381	chrX:151758460-151773001 (-) // 91.95 // qF3	8279.33	7442.87	6156.52	8375.52	2529.53	396.873	535.918	1704.38
1431269_at	Prdx4	53381	chrX:151771284-151773017 (-) // 88.9 // qF3	11.4446	14.31	11.0048	8.44316	8.08843	8.01945	7.4276	8.11994
1456681_at	Ptchd1	211612	chrX:152004278-152005001 (-) // 90.88 // qF3	10.0556	10.1849	9.48569	10.8417	10.2329	11.1615	10.5965	11.7904
1457649_x_at	Ptchd1	211612	chrX:152004368-152004656 (-) // 92.31 // qF3	4.17818	3.95652	3.88832	6.35519	3.95061	4.12423	3.94069	4.05718
1421979_at	Phex	18675	chrX:153596536-153853218 (-) // 98.08 // qF4	5.6275	5.69459	5.44585	6.29008	5.76072	6.04745	5.74242	7.31649
1450445_at	Phex	18675	chrX:153596536-153853218 (-) // 98.08 // qF4	5.38732	5.44233	5.21866	5.96604	5.54986	5.72062	6.16034	29.6912
1434190_at	Sms	20603	chrX:153881783-153882829 (-) // 88.01 // qF4	11.0523	8.47137	9.49517	7.71997	6.57349	6.77411	7.58343	7.27278
1436883_at	Mbtps2	270669	chrX:153985756-153988361 (-) // 92.58 // qF4	229.893	243.405	128.914	46.3983	26.1869	8.03043	7.9638	15.7199
1437495_at	Mbtps2 /// Yy2	100073351 /// 270669	chrX:154003881-154004651 (-) // 99.61 // qF4	450.181	352.323	254.189	112.342	34.909	12.6437	9.48747	9.59194
1418095_at	Smpx	66106	chrX:154137049-154190521 (+) // 98.23 // qF4	113.754	35.6103	80.4477	108.937	92.6975	17.6179	133.077	398.104
1440371_at	---	---	chrX:154253224-154253952 (-) // 91.46 // qF4	5.7268	5.10806	5.32527	5.34452	5.08361	5.26419	5.06356	5.19026
1445194_at	Cnksr2	245684	chrX:154259363-154260079 (-) // 98.74 // qF4	36.4358	39.8142	25.3081	17.4105	14.5823	16.8193	15.2263	16.6595
1441360_at	---	---	chrX:155711288-155712075 (+) // 81.28 // qF4	38.1499	85.1287	20.772	8.81844	8.91014	8.10186	7.8806	8.88075
1427299_at	Rps6ka3	110651	chrX:155768754-155802982 (+) // 98.51 // qF4	686.876	872.455	609.623	248.768	157.629	20.0727	10.4677	11.1068
1455206_at	---	---	chrX:155803349-155806175 (+) // 99.02 // qF4	199.214	199.527	109.768	17.7848	23.4673	7.56392	7.2044	9.58233
1419736_a_at	Eif1ay	66235	chrX:155810139-155825990 (+) // 90.22 // qF4	7594.51	7409	7691.84	4254.44	2906.18	517.833	370.619	867.503
1437071_at	Eif1ay	66235	chrX:155825683-155827553 (+) // 98.33 // qF4	20.1707	20.6949	15.9524	10.8096	9.77143	10.6756	9.17742	10.3764
1431403_a_at	Mtap7d2	78283	chrX:155897056-155924555 (+) // 99.63 // qF4	2263.27	2718.08	2451.97	660.415	571.209	87.2487	45.0758	23.7959
1429013_at	Mtap7d2	78283	chrX:155935625-155936689 (+) // 97.88 // qF4	1324.88	1568.38	1299.84	433.456	306.852	56.9875	10.8089	11.9007
1432995_at	2900057E15Rik	73021	chrX:155974795-155976219 (+) // 61.27 // qF4	38.0278	52.0972	32.3393	15.4314	14.666	15.2985	9.75848	11.7813
1453375_at	4930422N03Rik	76871	chrX:155997909-155999463 (+) // 77.82 // qF4	1927.81	1830.94	1620.14	524.312	362.362	68.7526	30.2064	18.5057
1434910_at	A830080D01Rik	382252	chrX:156005038-156030999 (+) // 75.45 // qF4	281.748	297.922	206.161	29.9253	63.0387	13.7769	8.50529	4.40067
1432269_a_at	Sh3kbp1	58194	chrX:156135247-156355234 (+) // 99.73 // qF4	11.9305	12.9303	10.4151	8.69919	8.55281	8.85619	7.8898	9.29034
1460337_at	Sh3kbp1	58194	chrX:156146532-156412355 (+) // 99.29 // qF4	219	240.497	175.05	65.2916	49.6455	10.9483	33.2275	78.3556
1431592_a_at	Sh3kbp1	58194	chrX:156380652-156411262 (+) // 96.71 // qF4	300.649	81.0889	83.4445	89.8513	79.7967	32.5729	117.24	511.959
1418560_at	Pdha1	18597	chrX:156560146-156576345 (-) // 98.71 // qF4	122.309	88.1771	104.903	15.4618	70.6014	13.9587	7.966	7.98974
1449137_at	Pdha1	18597	chrX:156560146-156576345 (-) // 98.71 // qF4	112.936	97.256	104.476	25.941	48.5159	18.3525	10.5326	9.40779
1437941_at	Phka2	110094	chrX:156967261-156967745 (+) // 78.36 // qF4	16.7879	19.0189	8.60659	10.5646	7.90881	7.91855	8.44002	8.05904
1434518_at	Phka2	110094	chrX:157016574-157029654 (+) // 99.93 // qF4	689.913	814.928	680.78	303.554	208.197	42.9233	39.5202	162.144
1443402_at	---	---	chrX:157018212-157018821 (+) // 99.51 // qF4	8.20751	21.5759	8.85204	10.2373	8.22709	9.18058	8.33597	9.69754
1441882_at	---	---	chrX:157028893-157029071 (+) // 59.45 // qF4	7.26449	5.64716	5.53227	6.68841	5.75161	6.86802	5.76448	6.1287
1421085_at	Rs1	20147	chrX:157205946-157237320 (+) // 53.07 // qF4	4.51878	4.54196	4.44464	4.67174	4.57457	4.78691	5.16866	5.01956
1429625_at	2900054C01Rik	73049	chrX:157239323-157241894 (-) // 99.61 // qF4	43.2298	52.7757	47.3783	20.0895	9.4215	5.1448	5.06064	5.30643
1421514_a_at	LOC100047360 /// Scml2	100047360 /// 107815	chrX:157562199-157694818 (+) // 94.87 // qF4	2625.98	3166.16	2734.68	1560.4	720.198	114.414	40.0454	79.1063
1456984_at	LOC100047360 /// Scml2	100047360 /// 107815	chrX:157695467-157696145 (+) // 99.41 // qF4	384.048	450.426	435.265	247.177	105.136	29.2443	20.6703	18.7042
1452358_at	Rai2	24004	chrX:158154967-158217429 (+) // 95.95 // qF4	10.2416	9.87096	9.49054	15.8541	10.4337	11.7808	11.0348	20.8552
1441564_at	---	---	chrX:158251610-158252271 (-) // 100.0 // qF4	8.75347	9.56059	51.9824	70.5876	8.42674	8.65449	8.28082	42.0158
1435389_at	Reps2	194590	chrX:158849880-158850612 (-) // 98.39 // qF4	197.28	181.043	125.089	30.865	22.2743	9.23247	8.57163	14.9157
1446652_at	Reps2	194590	chrX:158854394-158855029 (-) // 99.84 // qF4	5.80293	6.90041	6.21322	5.65226	7.71183	5.7877	5.45936	5.69264
1415775_at	Rbbp7	245688	chrX:159198317-159217030 (+) // 99.38 // qF4 /// chrX:138645115-138646725 (+) // 68.53 // qF2	6814.33	7229.84	5961.04	3126.36	2205.8	398.638	221.629	335.437
1456227_x_at	Rbbp7	245688	chrX:159216443-159216721 (+) // 96.8 // qF4	17009.1	17819.4	15421.5	8164.12	6654.72	1339.81	728.39	985.812
1439131_at	4932441K18Rik	353170	chrX:159226721-159227414 (-) // 67.03 // qF4	13.567	10.1906	9.51743	8.70235	7.7025	7.88517	7.15552	7.76027
1416472_at	Syap1	67043	chrX:159294777-159326379 (-) // 99.09 // qF4	1336.03	1253.6	954.503	617.588	304.066	51.9302	57.1166	99.5538
1441906_x_at	Syap1	67043	chrX:159294778-159295004 (-) // 81.68 // qF4	57.4327	37.5855	32.4494	14.7898	9.92431	4.55107	5.14723	5.4585
1448111_at	Ctps2	55936	chrX:159340115-159469264 (+) // 95.71 // qF4	27.3401	23.3735	30.1474	15.9427	15.994	6.44339	11.1677	31.746
1450260_at	Grpr	14829	chrX:159951835-159987609 (-) // 99.92 // qF5	4.50067	4.55111	4.48977	4.79732	4.57961	4.73077	4.54365	4.69729
1449239_at	1700045I19Rik	74264	chrX:160198053-160199261 (-) // 98.52 // qF5	13.9232	7.0873	9.13026	28.1823	15.8864	8.58755	19.0105	159.486
1452657_at	Ap1s2	108012	chrX:160346948-160371598 (+) // 98.34 // qF5	26.972	7.89742	7.80286	7.05078	6.62882	5.31105	7.27934	7.49914
1460036_at	Ap1s2	108012	chrX:160365816-160367478 (+) // 99.34 // qF5	284.172	306.932	256.817	209.196	73.3004	48.4943	98.0549	253.947
1444361_at	---	---	chrX:160367526-160368393 (+) // 99.54 // qF5	11.7149	15.581	14.8749	14.267	11.7354	12.5733	12.0783	19.7573
1447903_x_at	Ap1s2	108012	chrX:160371150-160371299 (+) // 76.04 // qF5	17.2317	10.0578	8.89605	18.6635	9.71057	10.5585	9.32754	10.8805
1442154_at	Zrsr2	22184	chrX:160388304-160389335 (-) // 96.6 // qF5	8.82234	8.70226	7.28093	9.76291	7.24531	7.55415	7.35306	8.25568
1455727_at	Zrsr2	22184	chrX:160390544-160396252 (-) // 100.0 // qF5	3140.59	4134.05	5088.27	2020.92	1548.05	248.628	86.6036	44.2891
1444611_at	---	---	chrX:160413857-160414178 (+) // 93.86 // qF5	14.0518	11.5643	11.0069	12.9256	11.1305	12.3353	11.2338	12.525
1419705_at	Car5b	56078	chrX:160416897-160452931 (-) // 87.21 // qF5	6.38645	6.26814	9.55519	6.35293	6.1706	6.22107	6.10583	6.27985
1419404_s_at	Siah1a /// Siah1b	20437 /// 20438	chrX:160508588-160513981 (-) // 99.55 // qF5	627.407	725.123	673.175	184.637	169.411	190.648	196.382	164.594
1429001_at	Pir	69656	chrX:160707368-160810839 (+) // 99.73 // qF5	36.4682	20.6657	30.6026	7.7192	10.0595	12.7606	7.26837	8.70351
1438953_at	Figf /// LOC100047108	100047108 /// 14205	chrX:160838594-160838901 (+) // 99.35 // qF5	7.33211	6.86481	7.47476	7.0893	6.9128	7.01026	6.76539	7.03645
1438954_x_at	Figf	14205	chrX:160838594-160838901 (+) // 99.35 // qF5	7.83771	7.30373	6.94266	7.04882	7.15571	6.88469	6.56528	6.81959
1427305_at	Piga	18700	chrX:160857749-160871848 (+) // 97.42 // qF5	527.935	476.847	484.357	140.636	98.0641	13.8851	34.4352	237.622
1453497_a_at	Piga	18700	chrX:160863294-160869989 (+) // 99.83 // qF5	167.828	139.029	105.782	53.3081	35.1879	12.5275	19.7941	204.38
1426309_at	Asb9	69299	chrX:160944299-160977686 (+) // 97.0 // qF5	662.362	528.761	849.699	737.147	516.681	89.7185	216.828	962.028
1424124_at	Mospd2	76763	chrX:161374107-161418260 (-) // 98.29 // qF5	15.1433	8.31246	13.6923	9.18732	9.50062	7.35237	7.6702	8.24629
1446226_at	Fancb	237211	chrX:161430633-161431185 (+) // 80.58 // qF5	6.37763	6.52662	7.30522	7.24989	6.50618	6.66056	6.47268	6.77261
1444239_at	Gemin8	237221	chrX:162615242-162616184 (+) // 73.52 // qF5	12.756	9.81087	10.6164	6.84869	6.49297	6.67861	6.46014	7.0278
1424587_at	Gemin8	237221	chrX:162616357-162628083 (+) // 77.83 // qF5	8.07405	8.19672	8.05247	7.0951	5.61272	7.07232	6.7277	7.378
1451400_at	Gemin8	237221	chrX:162616357-162628083 (+) // 77.83 // qF5	284.058	229.071	270.281	189.521	124.489	36.0645	35.6276	229.043
1423091_a_at	Gpm6b	14758	chrX:162676966-162826964 (+) // 97.22 // qF5	26.0511	29.8165	47.5498	38.5834	21.9116	12.1994	26.3944	29.3093
1427172_at	Ofd1	237222	chrX:162828855-162846632 (-) // 99.38 // qF5	1042.41	1283.45	1328.61	383.935	261.027	75.6648	36.0732	110.318
1448391_at	Rab9	56382	chrX:162895190-162917609 (-) // 94.13 // qF5	1327.26	1224.22	1157.78	574.514	388.888	66.2261	42.7815	61.5151
1435236_at	Tceanc	245695	chrX:162937743-162938503 (-) // 100.0 // qF5	153.89	123.567	101.829	52.7927	27.9141	20.3001	6.38989	10.0234
1419332_at	Egfl6	54156	chrX:162960929-163023644 (-) // 99.63 // qF5	5.53994	5.49315	5.65552	6.17819	5.42949	5.79153	5.41523	5.62856
1415906_at	Tmsb4x	19241	chrX:163645025-163645984 (-) // 71.91 // qF5	3316.85	1188.2	983.779	1171.6	777.812	250.258	607.832	989.402
1454843_at	Prps2	110639	chrX:163784253-163785400 (-) // 93.94 // qF5	14.9794	8.71559	12.1878	8.48219	10.4387	8.74965	8.18208	8.85253
1420637_at	Prps2	110639	chrX:163784853-163820664 (-) // 98.16 // qF5	8.22493	7.02203	10.2813	6.20111	5.84574	5.01695	5.31275	5.80416
1448645_at	Msl3	17692	chrX:165092039-165111830 (-) // 95.33 // qF5	8.56571	7.11403	8.38674	8.00842	6.85652	7.44403	7.09875	17.1483
1451867_x_at	Arhgap6	11856	chrX:165233904-165742367 (+) // 90.91 // qF5	6.29362	6.91013	5.99062	7.81057	6.3455	7.168	6.28901	7.26981
1451614_a_at	Amelx	11704	chrX:165617952-165625132 (-) // 98.25 // qF5	4.62002	4.63293	4.53608	5.41935	4.72987	4.88206	4.68243	4.9116
1420889_at	Hccs	15159	chrX:165749397-165758252 (-) // 99.69 // qF5	120.371	82.2006	78.1029	4.91184	4.59626	4.82429	4.62583	4.74813
1420890_at	Hccs	15159	chrX:165749397-165758252 (-) // 99.69 // qF5	2504.22	2237.37	1770.75	944.382	477.943	66.0108	29.5248	8.57738
1427198_at	BC022960	237246	chrX:165806836-165808074 (+) // 97.94 // qF5	798.489	864.747	1035.55	555.264	337.742	68.8975	97.0277	566.299
1420777_a_at	4933400A11Rik	66747	chrX:166214132-166217567 (-) // 99.64 // qF5	264.034	25.742	33.0163	65.5186	64.3041	21.4269	57.7709	375.833
1438239_at	Mid1	17318	chrX:166413161-166413986 (+) // 97.62 // qF5	72.9661	98.8035	42.3955	15.4042	9.04009	6.29118	9.48191	44.3285

## Sheet: Multicopy probe sets
Probe Set ID	Gene Symbol	Entrez Gene ID	Spermatogonia	pre-Leptotene	Leptotene/Zygotene	early-Pachytene	mid-Pachytene	late-Pachytene	Diplotene	Round Spermatids
Ampliconic
1424537_at	100040533 /// 100040606 /// 100040722 /// EG546185 /// ENSMUSG00000078216 /// Gmcl1l /// OTTMUSG00000016405 /// OTTMUSG00000016406 /// OTTMUSG00000016407 /// OTTMUSG00000016411 /// OTTMUSG00000016453	100040533 /// 100040606 /// 100040722 /// 434725 /// 546185 /// 627264 /// 630022 /// 668958 /// 668960 /// 668964 /// 71847	174.89	27.7556	87.7425	417.296	306.355	133.173	462.036	2090.4
1454216_at	4930408F14Rik	74851	6.11713	5.2152	6.37353	11.8424	10.6061	6.63928	28.5131	188.275
1449912_at	LOC100044599 /// Ssxb1 /// Ssxb11	100044599 /// 387588 /// 67985	69.4314	46.451	110.361	235.003	196.947	110.51	194.808	1094.39
1419540_at	EG434726 /// Fthl17 /// OTTMUSG00000016862 /// OTTMUSG00000016933	434726 /// 434727 /// 434728 /// 83457	2145.09	1471.43	1305.76	712.975	424.394	104.922	44.5595	14.1172
1420448_at	Rhox2a	75199	1219.92	1172.43	1001.59	594.813	222.297	41.0201	31.3724	16.3309
1419229_at	Rhox4a /// Rhox4b /// Rhox4c /// Rhox4d /// Rhox4e /// Rhox4f /// Rhox4g	194856 /// 434759 /// 57737 /// 636177 /// 664608 /// 664609 /// 664610	18.4733	21.6009	64.2662	26.9347	38.6699	16.2813	15.6863	23.1405
1419018_at	Rhox6	19202	5.60829	5.6747	5.5169	6.14607	5.68626	5.84867	5.68397	5.85314
1449540_at	Rhox9	104384	5.56589	5.64494	7.8423	6.00749	5.40168	5.64967	5.31632	5.71896
1453217_at	4930527E24Rik	75140	410.064	161.275	653.325	1812.96	1254.27	823.622	2126.69	8676.31
1450542_s_at	Magea1 /// Magea2 /// Magea3 /// Magea5 /// Magea6 /// Magea8	17137 /// 17138 /// 17139 /// 17141 /// 17142 /// 17144	332.396	267.849	363.802	105.688	98.3811	26.0304	11.65	17.5615
1420357_s_at	Xlr3a /// Xlr3b /// Xlr3c	22445 /// 22446 /// 574437	1064.19	982.919	1045.42	452.567	386.223	76.7963	23.2541	12.995
1430226_at	Xlr4c	72891	5.617	5.63923	5.46947	6.34764	5.735	6.10909	5.65955	5.96376
1429745_at	DXBay18 /// EG434797 /// EG546325 /// EG667413 /// OTTMUSG00000017677	434797 /// 546325 /// 574404 /// 574405 /// 667413	37.0908	38.4714	42.6711	38.5543	35.6724	21.8552	50.4846	376.007
1450293_at	Mageb3	17147	40.4878	30.9344	62.1647	29.5951	103.089	250.835	209.634	135.552
1453280_at	Mageb5 /// OTTMUSG00000017976	629542 /// 74271	17.2122	11.4887	29.0656	70.3828	53.5206	22.7843	99.1505	579.678
1460441_at	Zxdb	668166	6.10416	5.25048	5.96215	5.53213	5.56611	5.48668	5.40634	5.47734
1455817_x_at	Zxdb	668166	8.32412	7.28667	7.9647	8.69722	7.13888	7.74923	7.1785	7.80599
1456942_x_at	EG668339	668339	116.216	115.438	211.103	596.461	161.075	66.3296	168.467	119.258
1432116_at	1700031F05Rik	73300	5.41023	4.38841	7.45829	3.98131	4.63074	4.03596	12.0281	6.60031
1453544_at	Dmrtc1c /// Dmrtc1c2	668357 /// 71083	200.539	268.218	182.212	189.327	64.8907	10.7459	19.3103	17.4324
1447725_at	C030034E14Rik	77469	20.1691	29.0291	38.5471	11.3032	11.9287	6.52007	6.02476	6.25799
1427968_at	Tgif2lx /// Tgif2lx2	100039551 /// 245583	25.4426	10.7476	59.9049	204.719	158.24	78.3534	291.6	1297.1
1449962_at	AV320801 /// EG331529 /// OTTMUSG00000018782 /// Pramel3	100040635 /// 331529 /// 331531 /// 83565	3354.36	3431.28	3655.03	1510.68	1034.48	294.613	243.098	1044.84
1427346_at	Luzp4 /// Ott /// OTTMUSG00000019001 /// OTTMUSG00000019138 /// OTTMUSG00000019145	18422 /// 382243 /// 434863 /// 434864 /// 434865	10698.5	8702.82	8344.17	4618.22	3021.84	626.242	575.514	1089.17
Non-Ampliconic
1419187_at	1700012L04Rik /// OTTMUSG00000016779 /// OTTMUSG00000016790 /// OTTMUSG00000016887	100042927 /// 547154 /// 547160 /// 76383	1392.8	104.043	243.534	646.171	439.624	153.154	388	2220.11
1460378_a_at	Tes	21753	290.228	157.763	232.087	531.386	304.353	169.058	361.14	1653.83
1430524_at	1700020N15Rik /// EG627927	627927 /// 75509	2015.14	173.17	195.14	241.412	361.955	121.202	285.874	1286.06
1432326_at	1700042B14Rik	73347	10.8115	8.24897	24.6684	167.719	89.5101	12.1154	142.08	709.676
1437988_x_at	1700003E24Rik	100042663	5850.91	613.779	836.859	1272.2	1445.62	460.442	1194.06	5224.88
1429636_at	1700010D01Rik /// EG546347	546347 /// 76386	3640.24	308.572	658.66	1789.36	1412.48	419.188	1238.97	5524.9
1432433_at	4930524N10Rik	75071	6.89681	5.69768	8.7814	69.9055	54.0321	27.6962	111.769	658.12
