# Supplementary material for: A Global Expression Switch Marks Pachytene Initiation during Mouse Male Meiosis
Source: Genes (Basel). 2010 Dec 13;1(3):469–83. doi: 10.3390/genes1030469 (PMC3966219; doi:10.3390/genes1030469)
Supplement: Supplementary File 4 — Supplementary Dataset S4 (XLS, 214 KB) [file genes-01-00469-s004.xls]

## Sheet: Spermatogonia
#1-SpermatagoniaTop50
Probeset ID	Spermatogonia-PRJB02	Spermatogonia-PRJB05	Spermatogonia-PRJ07	Spermatogonia-PRJB08	pre-Leptotene-PRJB02	pre-Leptotene-PRJB05	pre-Leptotene-PRJB08	Leptotene/Zygotene-PRJB02	Leptotene/Zygotene-PRJB06	Leptotene/Zygotene-PRJB08	early-Pachytene-PRJB05	mid-Pachytene-PRJB04	mid-Pachytene-PRJB06	late-Pachytene-PRJB02	Diplotene-PRJB04	Diplotene-PRJB06	Round Spermatids-PRJB04	Round Spermatids-PRJB05	Round Spermatids-PRJB06	Round Spermatids-PRJB08	GeneSymbolAffy	EntrezIDAffy
1436996_x_at	1434.2	1278.57	1313.22	2796.47	371.206	20.6164	73.2485	37.2994	19.2933	25.0411	7.48255	17.697	21.6032	12.634	12.4154	13.1605	64.0658	12.1391	26.8624	21.2512	Lyz1	17110
1435290_x_at	2935.6	871.886	150.477	2248.27	1676.66	36.8177	16.5544	127.92	6.54801	13.7035	7.37959	24.8595	7.09197	8.27628	6.47663	6.30061	19.0878	6.43442	5.93876	5.17489	H2-Aa	14960
1425519_a_at	2892.83	1032.49	386.837	3575.57	1317.6	53.5187	25.4345	136.257	10.7279	30.3053	9.43414	23.9163	13.2484	13.4551	10.5964	12.8495	28.693	13.218	13.5689	13.2587	Cd74	16149
1439426_x_at	825.376	710.954	642.237	1425.96	141.778	9.80653	27.4777	21.992	8.84147	11.44	12.5896	11.0485	10.9811	11.5722	11.3595	14.6692	51.1502	56.5871	17.3341	13.7749	Lyz1	17110
1423547_at	222.049	470.856	559.312	1246.97	60.9937	9.11009	9.1462	9.96223	8.80465	11.4677	8.9382	13.1397	10.9143	8.13181	10.7882	9.04415	15.2873	9.3952	11.3289	8.56538	Lyz2	17105
1422892_s_at	959.16	299.635	58.3982	942.053	539.925	17.4112	6.20543	43.6524	5.68447	5.49406	7.07099	7.04046	6.35753	4.76627	4.85013	5.17383	6.3811	4.70829	7.00053	6.73149	H2-Ea	14968
1448591_at	1065.2	215.006	171.153	899.663	516.157	9.29111	9.14083	20.1748	9.81663	9.62275	12.7436	9.99866	11.6001	10.5845	10.9339	12.5937	12.1648	10.3921	12.696	20.6701	Ctss	13040
1449984_at	518.164	143.272	163.037	1052.94	253.589	7.03205	5.74162	8.66643	5.04717	5.99491	6.23436	5.92746	5.98548	6.1792	5.26581	5.53924	6.0842	6.05005	6.24475	6.07438	Cxcl2	20310
1417025_at	848.828	266.8	90.1172	781.744	341.577	22.6117	8.29164	27.991	7.99235	13.3582	7.87829	12.5954	8.49132	9.17808	7.88561	7.5222	17.2745	14.7932	8.07937	9.21795	H2-Eb1	14969
1422124_a_at	247.973	129.151	240.112	689.163	40.0651	5.40608	12.2985	5.52605	5.20546	5.6213	5.60546	5.46729	5.50371	7.02823	5.80711	5.31202	5.55225	5.49159	5.785	5.59602	Ptprc	19264
1438858_x_at	1321.51	334.787	72.3604	802.026	771.641	20.3529	13.0016	83.1186	5.05525	12.083	16.133	18.3428	7.91234	14.9591	9.13062	5.25942	17.8617	9.12851	10.4327	6.06407	H2-Aa	14960
1436905_x_at	588.217	279.164	202.986	418.464	302.163	13.9122	32.7137	27.8936	8.57331	13.9735	19.64	10.5208	10.1193	12.179	11.6663	11.0973	11.5436	18.9087	12.1992	11.7651	Laptm5	16792
1419561_at	1135.51	102.391	58.8343	480.752	459.807	4.40195	4.40385	28.7745	4.19933	4.85288	4.57863	4.52801	4.42586	4.63326	4.57333	4.36824	4.62286	4.5192	4.65651	4.56937	Ccl3	20302
1424542_at	94.2191	201.369	208.231	507.124	5.42693	5.10894	23.3533	5.28584	4.74271	5.0968	6.69106	5.26668	5.29848	5.42664	5.34915	5.02689	5.33259	5.26029	5.51161	5.31467	S100a4	20198
1420394_s_at	250.425	154.056	109.381	452.432	169.386	6.37962	6.5282	24.8869	5.9321	6.24125	7.45855	7.47168	6.8739	7.57252	7.27973	6.3479	7.72751	7.24251	7.98275	21.9556	Gp49a /// Lilrb4	14727 /// 14728
1449399_a_at	286.842	131.292	77.6866	511.724	114.968	7.53177	8.05091	19.0358	6.7766	7.27991	8.78708	8.16052	8.62415	8.75895	8.73568	8.39326	9.78477	8.61175	8.80662	12.7015	Il1b	16176
1452431_s_at	284.928	164.095	46.7637	651.05	167.404	8.97329	8.78539	14.6075	7.7716	8.80655	10.003	8.96253	8.94894	9.75382	9.72074	8.40454	9.48365	10.018	9.68279	9.19361	H2-Aa	14960
1419872_at	833.638	119.438	47.1985	228.758	534.058	4.42842	4.33755	6.68094	4.37721	4.30703	4.57388	4.46458	4.35681	4.41832	4.63378	4.40049	25.5306	4.90203	4.57106	5.08839	Csf1r	12978
1436434_at	254.272	378.001	586.07	112.98	90.4935	176.6	147.497	18.0912	19.379	21.9224	18.4864	8.18508	7.09537	11.0047	7.6619	7.6675	11.2971	7.14008	7.39122	8.37006	E2f2	242705
1421578_at	399.484	70.2098	37.4708	243.973	229.409	7.58462	8.70572	16.2408	7.18079	7.52575	7.53491	7.20356	7.64584	7.35217	7.32156	7.35673	7.30545	7.28016	7.38034	11.4769	Ccl4	20303
1450792_at	252.21	105.591	57.3398	158.98	117.728	6.67604	4.04952	7.56134	3.92012	4.13648	4.34166	4.09182	4.05647	4.21786	4.19709	3.98098	4.14567	4.12538	4.25181	4.14262	Tyrobp	22177
1417268_at	215.402	106.7	32.861	243.473	105.37	3.95274	3.94162	4.83237	3.92129	5.05471	4.12077	3.98361	4.02928	4.10949	4.0577	3.93416	4.04012	4.02803	4.13185	4.04211	Cd14	12475
1460218_at	107.497	74.5063	98.7653	227.418	29.7597	6.02194	13.9477	6.14684	5.82314	6.11294	6.14542	5.99968	5.9887	6.63206	6.08682	5.99237	6.12289	6.02532	6.26586	6.05122	Cd52	23833
1416246_a_at	132.647	150.346	148.976	311.203	79.1839	15.5583	41.9706	49.2758	14.8175	26.5384	13.1106	28.0332	14.4645	10.197	13.3378	8.06834	11.8361	9.78002	13.6232	13.8584	Coro1a	12721
1455790_at	112.525	95.3799	170.944	63.0751	72.0597	49.7747	75.202	11.8645	25.8927	9.05916	8.12154	5.00668	4.243	4.4884	5.05157	8.5046	5.18367	4.01296	4.64334	6.77209	E2f2	242705
1437874_s_at	812.726	188.227	73.037	414.331	442.138	20.4494	20.1808	64.3915	32.9579	37.2328	25.0496	30.0152	10.5143	17.1633	8.82685	10.675	25.9015	20.0046	18.2659	9.72147	Hexb	15212
1421375_a_at	109.78	116.849	112.013	390.315	18.3586	15.5857	27.3032	16.0573	12.5729	15.0216	15.793	22.8377	12.7418	13.5843	14.7841	12.3205	24.331	14.8835	15.6806	15.0562	S100a6	20200
1427742_a_at	43.5025	103.814	80.3228	246.918	30.9973	66.2717	92.3102	9.62155	44.9421	62.8228	10.2021	9.19104	9.67282	6.12369	6.66912	6.16507	7.25361	7.17476	10.206	8.47523	Klf6	23849
1426025_s_at	132.33	93.0472	42.6938	154.843	75.2584	9.12487	18.1404	8.46849	8.56041	8.06194	8.80588	8.43157	8.4183	8.58864	8.52597	8.18752	8.56929	8.45859	8.5577	8.52819	Laptm5	16792
1415983_at	196.046	74.8752	146.586	399.753	52.9146	14.8832	46.0745	18.0835	20.6694	34.5988	14.5976	18.0406	17.525	13.5565	13.3681	11.6508	15.081	22.4274	14.3335	16.4514	Lcp1	18826
1448617_at	63.8298	82.9188	74.7016	188.817	18.591	7.03944	7.29745	7.29159	6.68354	7.01142	7.66138	7.23609	7.38026	7.54534	7.50443	6.99021	8.03129	7.46645	7.90755	7.65846	Cd53	12508
1432466_a_at	141.599	390.555	105.608	852.667	31.2278	56.7263	23.2369	25.8219	27.3227	37.0429	23.8048	28.6197	29.6007	23.5458	23.4952	18.6565	22.9886	47.875	30.586	29.6372	Apoe	11816
1416111_at	166.843	30.675	30.3111	376.694	47.3286	7.33143	7.26329	7.5969	6.74756	7.07103	7.77316	7.56663	7.56311	7.7832	7.67294	7.19752	7.75359	7.62057	9.69834	8.60659	Cd83	12522
1416168_at	105.88	63.4582	19.723	424.16	40.0928	6.00208	6.18061	7.36133	5.63174	9.21965	6.80809	7.24314	7.25193	6.69987	6.61067	5.72874	29.8765	28.2045	11.9317	7.39749	Serpinf1	20317
1460180_at	213.186	66.0596	35.7495	232.756	80.093	11.5693	11.5879	25.0867	11.2829	24.704	12.302	11.8095	11.9244	12.1884	11.9962	9.41695	11.9968	11.8675	12.3232	11.9324	Hexb	15212
1421855_at	33.1857	43.2789	70.7797	543.599	13.6829	7.91065	9.03375	9.49153	7.99039	8.7071	10.7273	9.87306	9.67608	10.1146	9.89563	8.20753	15.7584	31.4013	25.2995	43.5437	Fgl2	14190
1456014_s_at	160.006	59.7236	57.3831	85.4328	83.3997	15.1928	26.068	7.62163	20.654	7.74509	7.82632	8.63161	7.21549	7.63553	7.4376	6.8397	16.9992	7.49281	9.16188	7.41616	Fermt3	108101
1448748_at	118.045	42.8616	40.4627	199.025	26.9853	7.06984	7.14174	7.43254	6.70356	6.94204	8.39407	7.56861	7.45793	8.07109	7.92249	7.50722	8.0386	7.69572	8.92143	10.4009	Plek	56193
1423488_at	44.3496	82.1799	198.26	132.231	30.9825	56.9975	89.0764	16.8958	50.5601	99.0514	6.36313	8.03977	5.50845	4.26927	4.31342	4.06431	5.44151	4.17237	4.30646	4.21586	Mmd	67468
1436778_at	153.019	60.6881	31.6709	124.51	64.9989	4.60775	4.60011	4.72239	4.46885	4.50778	13.1373	4.68546	4.75177	4.93295	4.78512	4.55831	4.80448	4.72417	4.97711	4.8198	Cybb	13058
1423809_at	838.962	1113.95	1200.4	381.91	460.327	565.132	391.201	231.781	164.332	118.673	90.1213	65.3247	12.5006	35.1873	34.1011	10.638	13.9142	11.2423	8.25433	11.4507	Tcf19	106795
1432568_at	279.411	541.089	40.8617	10.9599	6.74262	10.9535	7.92034	17.5572	10.8369	10.5244	10.8912	29.5255	11.6966	6.39073	11.9408	7.61423	98.6005	74.7818	41.6432	25.9993	Cby3	76653
1434564_at	126.972	171.585	282.708	71.5509	67.7473	97.7785	71.8209	19.6981	64.1513	60.7631	19.8241	18.3729	14.2789	7.19622	7.20267	11.1323	9.05784	6.85199	7.81478	8.46554	E2f3	13557
1415899_at	134.317	262.455	78.6196	1244.4	55.1734	49.7113	88.258	44.203	15.2639	97.098	17.4831	31.7222	15.7179	8.75835	12.6317	7.46532	16.0096	23.7773	16.6402	34.4953	Junb	16477
1417063_at	158.207	112.986	10.1215	145.959	93.3213	5.6227	5.57141	5.9497	5.41378	5.55501	7.15723	5.7882	5.80549	5.95673	5.89938	5.61433	7.51916	5.89476	6.46127	6.19665	C1qb	12260
1427076_at	136.664	38.8631	33.5058	130.651	36.1886	5.42239	5.38737	8.97744	6.69082	5.40329	5.44127	5.52736	5.20849	5.45379	9.73198	5.08596	6.2728	5.31741	5.48922	5.32306	Mpeg1	17476
1437401_at	63.0834	47.1546	16.6853	505.171	23.0874	5.4573	4.68886	10.017	5.99021	10.8668	6.90106	10.1697	9.23191	8.43543	10.3534	7.505	31.7987	18.2952	15.6812	10.7386	Igf1	16000
1449363_at	555.933	295.379	104.711	1009.36	332.121	56.6529	119.638	114.918	27.4411	130.6	40.8278	81.1655	31.6974	35.0998	31.1354	28.7803	54.5714	44.8048	44.3355	42.6897	Atf3	11910
1430284_at	1340.7	2157.52	270.316	91.8279	81.4182	51.9007	40.0099	72.033	57.7236	38.6423	59.8249	107.676	78.1378	24.7	55.1158	27.2453	360.478	178.206	213.827	182.984	1700008P02Rik	69347
1429864_at	577.234	1676.59	203.606	63.0616	39.8714	60.329	38.1826	42.7243	35.3957	30.306	38.6754	79.9773	39.851	15.8512	40.672	37.7435	284.262	182.039	172.233	252.798	Spatc1	74281

## Sheet: Pre-Leptotene
#2-preLeptoteneTop50
Probeset ID	Spermatogonia-PRJB02	Spermatogonia-PRJB05	Spermatogonia-PRJ07	Spermatogonia-PRJB08	pre-Leptotene-PRJB02	pre-Leptotene-PRJB05	pre-Leptotene-PRJB08	Leptotene/Zygotene-PRJB02	Leptotene/Zygotene-PRJB06	Leptotene/Zygotene-PRJB08	early-Pachytene-PRJB05	mid-Pachytene-PRJB04	mid-Pachytene-PRJB06	late-Pachytene-PRJB02	Diplotene-PRJB04	Diplotene-PRJB06	Round Spermatids-PRJB04	Round Spermatids-PRJB05	Round Spermatids-PRJB06	Round Spermatids-PRJB08	GeneSymbolAffy	EntrezIDAffy
1457851_at	59.1187	66.7195	23.6192	35.3406	82.6239	271.482	82.3304	40.1344	103.444	11.8066	9.01537	5.77488	8.7049	5.84501	5.76393	5.61767	5.745	5.48407	5.93051	8.60298	---	---
1430151_at	63.5487	75.5283	35.1239	26.1504	69.3635	214.632	93.5713	31.2572	101.472	16.255	7.96468	9.23401	11.3017	5.72985	5.67363	6.27095	5.6528	5.54119	5.80468	5.67847	Nisch	64652
1424142_at	136.112	95.6857	11.3163	110.99	138.356	113.794	143.694	143.782	51.9785	40.7875	11.7429	20.3363	9.77332	12.5139	11.3265	6.31111	8.96481	7.19807	6.02483	11.2796	Ikbkap	230233
1430697_at	370.003	201.281	158.889	165.066	361.807	258.525	302.982	239.426	158.693	54.4783	21.1643	23.4729	16.6798	12.7973	6.08821	4.60185	8.69682	3.43184	3.69335	6.68128	Ammecr1	56068
1420946_at	139.851	67.0029	8.90362	18.4421	104.423	78.0715	55.4738	71.546	25.0256	8.16324	7.08838	10.0793	5.96709	6.2497	6.17192	5.55518	6.15158	6.3479	6.48214	6.48662	Atrx	22589
1449480_at	21.9675	42.7849	31.3147	71.6195	31.2009	163.163	145.097	12.1894	88.1284	62.4789	10.0157	8.95098	10.8093	9.73648	9.11157	8.07932	8.88865	11.4708	10.0323	9.2963	Sap18	20220
1436434_at	254.272	378.001	586.07	112.98	90.4935	176.6	147.497	18.0912	19.379	21.9224	18.4864	8.18508	7.09537	11.0047	7.6619	7.6675	11.2971	7.14008	7.39122	8.37006	E2f2	242705
1436382_at	109.101	93.5343	33.7536	97.9682	164.192	105.337	161.042	89.0522	44.6615	56.0258	8.13256	6.54176	5.43628	5.22181	5.17549	4.99262	5.44106	5.1325	5.74837	6.13027	Zbtb12	193736
1435290_x_at	2935.6	871.886	150.477	2248.27	1676.66	36.8177	16.5544	127.92	6.54801	13.7035	7.37959	24.8595	7.09197	8.27628	6.47663	6.30061	19.0878	6.43442	5.93876	5.17489	H2-Aa	14960
1441869_x_at	151.615	111.811	40.8881	29.6339	156.277	353.28	60.9505	111.939	91.0721	19.5539	22.6743	23.2816	14.9567	15.6001	10.6338	17.568	15.3071	10.1077	11.515	15.3459	---	---
1459488_at	147.704	128.778	32.7768	50.7252	200.962	344.909	86.0745	126.57	79.9919	20.829	75.4721	19.2858	22.9593	16.0166	14.0157	15.2508	15.4437	13.2623	16.8601	16.1418	---	---
1444295_at	55.4381	32.2474	9.73997	10.7311	91.5696	128.534	23.9766	89.9674	19.4844	9.9614	11.7164	10.2499	6.78238	7.00027	6.2174	7.38953	7.07778	6.78014	7.26767	9.05063	Neo1	18007
1421106_at	30.7561	47.4054	82.119	108.319	40.093	107.317	130.887	15.978	44.1327	95.8785	9.43113	8.63463	7.80979	7.21085	6.35397	7.65203	7.52969	7.31959	7.96136	9.56897	Jag1	16449
1455790_at	112.525	95.3799	170.944	63.0751	72.0597	49.7747	75.202	11.8645	25.8927	9.05916	8.12154	5.00668	4.243	4.4884	5.05157	8.5046	5.18367	4.01296	4.64334	6.77209	E2f2	242705
1436244_a_at	68.5396	115.334	123.738	28.1637	96.5175	134.129	61.4686	14.6393	39.9072	27.9442	14.3057	12.0275	12.1611	6.14886	7.89787	5.75911	11.3177	12.9407	9.50869	6.19708	Tle2	21886
1430216_at	43.1629	64.807	16.4886	41.627	51.6427	107.791	127.83	58.7851	37.9044	9.98927	66.8423	11.5586	10.8812	11.9918	11.0331	10.6106	11.5231	10.6614	11.4754	10.9715	Zfp292	30046
1423184_at	1091.21	756.93	156.959	325.968	1282.51	1335.41	787.286	933.196	430.012	104.374	451.993	195.485	43.9307	45.6097	37.3947	6.126	28.7217	6.70226	5.01328	13.1219	Itsn2	20403
1445273_at	55.5548	26.6628	17.0781	28.2775	132.46	169.941	56.2933	82.7401	21.4217	16.33	17.9812	30.3605	11.1783	14.5293	13.357	15.4299	14.4714	13.2138	13.6647	10.2238	D10Ertd638e	52658
1441052_at	82.6834	40.3033	40.5132	9.33147	132.418	146.653	43.2046	47.3228	71.7561	14.7481	30.5588	5.94563	16.0888	5.89722	6.19979	13.0412	5.14291	5.12258	5.83567	5.9222	---	---
1450140_a_at	332.966	1844.92	63.3304	61.5753	325.232	1652.37	56.948	285.763	51.6361	32.5516	715.191	50.9774	23.1336	23.5001	10.4496	14.9416	10.9857	22.7635	13.755	5.34676	Cdkn2a	12578
1441530_at	27.8407	39.0055	15.0657	20.5783	42.4723	217.183	43.3154	35.4278	24.6686	10.4842	12.1265	12.042	9.73016	10.1762	9.9384	10.0961	9.86804	10.2705	10.3419	10.3685	---	---
1457107_at	52.5782	69.7404	24.352	21.5818	78.5822	308.859	82.762	78.0059	76.4087	20.4108	35.3517	16.7628	11.5966	11.3644	4.45669	5.41365	11.3386	14.3685	8.56419	11.6045	---	---
1442641_at	40.5632	17.3801	9.19888	11.8346	77.2495	116.423	27.609	39.8412	37.5803	11.7447	13.5124	6.76586	7.16473	5.71943	5.6586	5.2345	6.87234	5.62327	5.75148	6.16292	---	---
1420947_at	315.114	262.001	79.8443	421.274	373.535	365.692	743.076	234.547	201.983	86.8567	76.1396	63.4831	18.8691	9.06685	6.29859	9.82565	7.30815	8.61167	9.15579	6.34103	Atrx	22589
1459211_at	165.702	101.837	200.979	78.4056	344.974	220.621	335.087	154.659	221.14	198.681	15.8863	20.2736	15.7033	15.1166	6.96507	9.05138	6.9273	6.90172	7.09335	11.8522	Gli2	14633
1444151_at	11.5091	18.2493	11.2467	17.5392	12.2474	231.029	123.489	17.4023	38.1103	16.6198	38.8226	7.86445	11.2631	7.83317	4.78901	13.2698	7.5161	4.48759	7.90018	7.67744	---	---
1443212_at	52.7783	59.7163	17.8155	32.9107	74.5515	249.074	60.1437	47.0595	28.1314	17.1816	20.7967	9.8565	13.3438	7.88209	8.86893	9.14936	7.82302	6.6664	10.1858	9.6329	---	---
1441984_at	451.718	198.732	63.6258	295.565	529.433	286.675	467.919	315.235	118.03	76.5113	52.8662	81.3229	19.3103	21.2838	21.118	19.2119	20.341	21.3414	10.1967	14.7252	Clspn	269582
1446948_at	79.7012	61.3106	66.3838	62.0484	107.535	109.596	183.718	33.2791	85.5076	24.4787	16.7448	14.1667	19.9009	9.67516	8.576	9.05847	7.06905	7.09089	6.38033	7.63639	---	---
1418449_at	10.9608	7.21927	9.5826	10.1046	54.1179	40.4049	90.3129	50.0833	43.4471	20.7298	6.35365	7.17677	7.17655	5.92614	4.89417	5.87237	5.22278	5.69247	6.13356	5.56479	Lad1	16763
1419359_at	20.2214	44.4014	60.1038	215.034	13.9768	184.426	482.321	14.2599	115.342	203.666	16.9677	13.6269	13.7345	12.201	13.8336	20.2748	13.8576	14.2011	14.2622	78.0194	Hexim1	192231
1445881_at	113.765	161.116	52.0462	248.518	202.127	953.218	698.388	115.413	532.221	223.745	47.163	44.3732	117.516	35.576	29.736	64.1996	11.434	38.041	28.4099	27.2045	2310035P21Rik	75683
1458924_at	60.8925	39.4425	13.1553	27.2984	70.4817	117.205	73.409	31.9845	61.1606	14.6592	15.4073	14.959	10.3485	8.6482	8.4703	9.32448	10.0979	12.0185	8.66388	14.8367	D430013B06Rik	399594
1443241_at	100.826	21.3327	16.2132	67.3906	183.305	161.12	76.3405	118.037	61.8699	32.2589	29.6714	15.7353	14.1032	9.9445	9.7801	13.6259	9.76054	9.58239	15.2298	24.9248	---	---
1427742_a_at	43.5025	103.814	80.3228	246.918	30.9973	66.2717	92.3102	9.62155	44.9421	62.8228	10.2021	9.19104	9.67282	6.12369	6.66912	6.16507	7.25361	7.17476	10.206	8.47523	Klf6	23849
1426446_at	36.2745	26.463	24.3277	28.3853	111.043	66.7417	78.9151	37.4071	42.0737	18.6632	8.60208	11.0491	7.37939	7.47254	7.44337	7.11331	8.89766	7.52318	7.66785	7.5652	6430548M08Rik	234797
1444279_at	29.2322	49.6327	20.5559	14.843	29.9871	125.766	46.0211	26.607	11.4408	12.4296	7.39774	6.16234	6.24556	5.62465	6.28062	6.01087	6.25297	6.21952	5.81172	6.2448	Huwe1	59026
1421905_at	613.425	334.246	94.6814	341.271	611.316	428.902	468.624	433.635	255.239	77.4916	116.409	84.3129	57.6388	27.8213	18.3462	26.897	19.5129	18.7439	20.4165	16.7368	Tgs1	116940
1417831_at	194.052	123.463	36.304	142.128	134.812	122.033	168.134	80.8867	35.0038	10.7493	44.0016	15.5403	7.10655	9.29422	8.32604	10.1974	11.5592	11.3189	9.54042	11.6161	Smc1a	24061
1439739_at	987.915	1263.52	1317.26	118.069	916.192	2294.8	507.259	639.448	1631.02	192.081	2093.12	156.916	178.684	16.0515	36.141	8.34855	36.6771	8.28558	7.39424	7.21923	LOC100047259 /// Tsp50	100047259 /// 235631
1459185_at	49.9909	12.7094	46.4125	15.8404	74.7134	104.307	42.2489	14.4475	12.6322	9.89618	15.2698	11.7226	5.44605	12.9225	5.2801	9.56589	5.82992	12.2801	9.77657	5.72032	Npat	244879
1441360_at	24.6736	37.7543	67.3153	22.8565	34.5884	144.903	75.895	16.0304	25.678	20.6077	8.81844	9.64916	8.17111	8.10186	7.98024	7.78095	8.0496	8.22832	8.52415	10.7209	---	---
1428936_at	1805.48	1177.79	349.746	1236.76	1914.84	1644.7	1471.16	1340.08	930.066	525.274	275.927	253.227	142.618	69.7711	40.7956	10.394	54.5432	26.3188	11.7244	13.6258	Atp2b1	67972
1429668_at	171.877	247.256	350.752	73.9011	114.502	253.4	209.039	71.2255	119.958	58.5053	10.661	6.82757	8.12602	6.22005	6.1218	7.63658	6.61323	6.00339	6.37898	6.72583	Pou4f1	18996
1440868_at	103.329	73.0154	45.0252	79.1009	103.787	91.8219	136.651	83.5764	54.1533	20.138	21.049	9.98506	8.93755	20.4144	7.6464	13.4494	5.98486	7.0826	6.98984	9.93039	Gabpb2	213054
1434469_at	95.2456	153.886	385.85	558.499	153.786	205.297	411.354	57.861	72.0781	517.929	32.0581	25.08	23.3216	8.98034	6.28474	8.05937	5.4083	11.4786	6.12909	17.5413	Otud4	73945
1444757_at	17.9475	24.049	27.2085	23.7607	18.1911	101.449	76.0585	9.22376	33.7376	12.7526	7.52491	10.7348	9.18987	7.50263	4.05678	5.53088	4.26163	4.03328	9.23044	7.2805	---	---
1446735_at	138.181	67.6297	92.998	33.3524	112.655	253.531	146.99	94.9883	85.3492	47.9025	28.8919	16.202	10.9195	6.17148	10.7293	5.99144	8.66801	8.99363	6.19797	20.4846	---	---
1437487_at	49.1813	32.9019	8.1282	43.524	65.7767	61.7864	61.317	59.5367	24.5536	7.58899	7.2531	22.6802	6.94121	16.2064	6.99321	4.97747	6.94198	4.90278	5.2335	6.0507	Myst3	244349
1445307_at	28.1147	21.6015	16.3358	13.989	33.4837	175.917	22.8044	28.545	19.347	9.84579	6.98983	8.11198	6.1731	4.84923	4.77321	4.77202	4.85681	5.5753	4.8808	6.93667	---	---

## Sheet: Leptotene-Zygotene
#3-Leptotene-Zygot-Top50
Probeset ID	Spermatogonia-PRJB02	Spermatogonia-PRJB05	Spermatogonia-PRJ07	Spermatogonia-PRJB08	pre-Leptotene-PRJB02	pre-Leptotene-PRJB05	pre-Leptotene-PRJB08	Leptotene/Zygotene-PRJB02	Leptotene/Zygotene-PRJB06	Leptotene/Zygotene-PRJB08	early-Pachytene-PRJB05	mid-Pachytene-PRJB04	mid-Pachytene-PRJB06	late-Pachytene-PRJB02	Diplotene-PRJB04	Diplotene-PRJB06	Round Spermatids-PRJB04	Round Spermatids-PRJB05	Round Spermatids-PRJB06	Round Spermatids-PRJB08	GeneSymbolAffy	EntrezIDAffy
1420310_at	12.2718	19.1973	42.0113	174.525	13.6044	16.9741	134.61	12.7454	670.999	466.424	13.475	9.69834	461.155	9.6007	15.175	2307.69	14.7507	11.1797	1098.51	1653.49	---	---
1447329_at	5.40976	7.13084	25.0619	221.724	5.61848	5.84947	30.4959	5.39659	262.057	406.558	5.64597	5.45722	466.775	5.54247	5.50217	2027.76	5.52918	7.23197	628.083	1852.04	---	---
1427048_at	63.2694	7.98732	70.8061	201.374	96.715	36.4976	134.19	91.3644	191.829	171.747	6.51558	25.3205	13.9892	5.49766	5.28432	4.99868	5.21736	5.27878	5.6355	5.39764	Smo	319757
1427512_a_at	27.3636	5.12153	6.38957	71.3724	47.9828	5.71873	56.5622	59.2668	67.8092	74.7612	5.5215	42.658	6.52037	5.43508	5.25132	4.55374	6.46787	4.25048	5.50705	5.3285	Lama3	16774
1453196_a_at	59.4032	10.0588	11.0785	185.164	113.416	8.76937	31.5955	121.815	71.6239	103.332	15.4209	152.678	67.6623	10.7849	8.92934	7.20031	14.481	5.31872	5.64962	5.45604	Oasl2	23962
1440244_at	132.129	25.9382	47.6509	360.413	255.854	47.8016	243.589	342.66	289.999	292.222	45.7194	121.602	51.4615	15.0454	12.9472	26.4408	13.2319	10.9974	12.7137	13.242	Erg	13876
1448201_at	21.3279	7.69109	12.9017	125.223	37.6481	21.9562	80.7166	47.4622	135.942	111.656	14.1127	26.8765	15.9572	6.53816	6.47572	6.9104	6.448	6.10597	6.55807	8.1931	Sfrp2	20319
1455172_at	47.6685	22.251	19.3775	97.6535	83.2503	38.0187	62.6558	134.945	114.082	118.552	18.1733	42.3373	17.6461	11.7084	12.2573	6.68169	12.5381	10.2817	8.80141	9.34567	AU020094	105596
1457657_at	6.03481	5.13456	5.18976	162.133	5.34782	4.98283	70.2908	5.18706	142.852	272.591	5.60698	5.14732	192.514	5.35374	5.34673	456.006	5.26853	5.33252	154.875	890.441	---	---
1459679_s_at	44.7699	15.6229	82.3016	116.654	48.3097	35.3804	83.492	58.5947	46.6119	88.9233	6.51931	5.23516	5.40594	4.99449	5.03476	4.75367	5.0223	4.96816	5.1894	4.97546	Myo1b	17912
1433939_at	336.463	65.8134	88.699	990.7	625.327	84.8536	228.167	634.68	382.193	469.744	45.4738	551.352	224.682	51.6982	30.0454	18.5533	29.9142	12.5506	20.1098	18.9622	Aff3	16764
1420967_at	34.7288	9.03806	9.674	62.1933	64.9485	7.00893	27.2424	85.0774	42.213	93.3847	15.1619	39.5811	11.8826	8.53942	8.3816	6.84329	13.5278	8.27832	7.29783	8.23796	Slc25a15	18408
1455400_at	23.5101	4.22083	9.94857	64.4717	68.9758	15.9293	36.9969	95.5729	57.8324	59.3293	10.0579	51.5907	23.5213	4.68919	7.26121	4.62163	8.74202	4.77116	3.09039	3.62848	Ddah1	69219
1448991_a_at	78.3879	5.5723	17.3322	82.9525	111.121	7.99095	42.2287	128.159	66.9768	33.9938	5.43253	96.0496	22.8623	6.22675	5.29608	5.22849	4.87895	4.87481	4.90395	5.33911	Ina /// LOC100047943	100047943 /// 226180
1422825_at	15.4683	9.587	13.8112	63.0939	25.3217	24.0461	47.3721	47.9866	102.09	86.2479	13.6734	24.8038	20.759	5.65172	5.37154	5.33061	4.48038	5.25997	5.89903	4.73024	Cartpt	27220
1421816_at	81.0701	360.348	1049.33	2109.15	112.201	361.665	1452.75	112.745	852.706	1952.36	203.982	63.7886	240.205	6.53114	6.3848	18.9003	7.12291	8.78392	31.0096	5.77461	LOC630729	630729
1416239_at	73.9524	44.3442	104.749	329.9	105.455	66.1003	251.632	122.157	222.659	315.373	24.2387	36.9248	34.6746	6.59321	6.48694	6.56879	7.61641	8.76	12.4432	27.3489	Ass1	11898
1422050_at	10.3291	8.8669	7.88545	33.2122	26.1548	23.35	32.7434	65.4763	40.3094	47.1609	7.83587	7.64633	7.11062	7.58648	7.36823	6.83114	7.36973	7.23801	7.80409	7.12148	Nkx1-2	20231
1456789_at	137.371	16.4241	40.0343	210.544	211.226	20.3487	80.0962	195.097	151.789	119.792	17.7428	153.023	52.9451	13.7601	10.2238	20.0501	12.7947	7.53467	7.37789	21.1508	Zfp462	242466
1422544_at	14.3934	9.14082	63.8862	124.728	9.27874	27.5088	91.3024	18.0116	66.1464	103.901	8.46758	5.98619	8.905	5.72927	5.62384	7.91995	7.0631	5.66021	5.92128	9.35914	Myo10	17909
1433468_at	6.27997	5.34384	23.2407	139.727	12.6073	23.4862	111.677	8.61085	105.602	130.857	6.35965	6.58559	27.3373	4.60035	4.43109	4.46252	4.4122	4.47453	4.53281	4.1882	6430527G18Rik	238330
1424062_at	13.1243	13.1009	16.7877	82.5928	29.3999	18.7201	45.5221	49.457	67.2442	95.9017	8.75449	14.6997	25.4339	7.15824	7.92183	6.42516	7.9333	7.19812	7.85305	7.01947	Ube2d1	216080
1416467_at	87.6517	64.3964	64.6362	978.863	114.38	62.9527	306.934	226.157	360.51	399.327	36.9282	176.918	229.424	42.6927	12.0037	19.2459	57.2808	16.4598	65.4721	35.8356	Ddx3x	13205
1423413_at	27.4886	7.77171	18.5263	62.0626	16.6363	16.4285	69.3403	44.0419	52.8415	47.6549	4.28188	9.3358	4.35809	4.25375	4.19188	3.98941	4.17456	4.14812	4.28991	4.22004	Ndrg1	17988
1427307_a_at	25.1972	17.1474	16.7504	89.9895	75.3453	28.3196	68.0784	73.4666	99.4759	106.585	9.6442	21.2443	22.1758	9.53271	12.0625	9.09728	9.44379	4.89623	7.09623	9.4163	Dab1	13131
1436907_at	30.0285	9.78862	18.7703	110.95	83.0493	33.4192	50.0741	71.1123	89.7705	83.1777	15.078	19.8839	5.27696	4.85731	4.60468	4.61519	4.78158	4.87366	4.88846	4.82721	Nav1	215690
1450629_at	62.5521	21.275	18.5473	254.276	68.1893	33.1891	81.1654	141.168	74.3505	169.305	19.1089	104.068	27.8248	15.5526	22.9551	14.3006	20.5539	14.1196	15.645	18.6774	Lima1	65970
1427680_a_at	17.9695	10.6921	8.30353	98.6655	21.953	13.7223	47.9495	77.9468	35.0887	65.7808	9.84161	29.0424	10.8108	7.70682	6.99673	5.63108	9.90981	6.15525	7.74055	13.0004	Nfib	18028
1425326_at	74.0584	278.062	660.83	2078.93	141.633	340.441	1008.4	133.766	1605.03	1232.47	185.004	87.8506	612.216	27.9705	14.8966	65.3114	17.7425	17.6425	18.3865	29.0889	Acly	104112
1434850_at	18.9248	11.3968	15.5545	54.1006	47.3688	14.1116	47.9444	64.3415	53.8958	59.8834	5.37738	36.2099	11.3304	8.64653	5.22049	5.06006	7.19964	6.31955	6.55946	4.45031	Iqgap3	404710
1439106_at	315.601	62.2459	37.2748	443.68	555.356	66.1006	143.97	498.091	239.072	255.833	69.3558	347.474	145.371	51.1987	10.7531	24.998	10.2007	10.031	8.90076	51.207	Zfp462	242466
1448940_at	31.7426	10.2704	11.753	72.6702	40.4252	14.2879	17.399	83.8539	41.6898	59.6557	8.98429	75.7513	18.137	8.71372	8.64221	8.10933	6.77192	4.54016	8.7469	8.62186	Trim21	20821
1455893_at	30.3094	10.4848	12.109	41.8081	66.6259	24.0224	45.5508	68.6628	66.702	55.9676	15.8238	34.408	11.6451	3.73178	4.45334	4.3531	4.43369	4.42158	4.5136	4.43715	Rspo2	239405
1419355_at	59.2495	19.9151	44.0598	168.657	92.2611	36.1823	128.834	74.6599	132.704	112.262	13.9254	25.8965	18.2049	5.8906	4.45015	2.66993	4.43246	4.40812	4.51498	4.43256	Klf7	93691
1440990_at	22.8448	15.2082	8.41426	61.1744	70.8178	13.4978	56.5965	71.6647	63.7434	58.1419	8.42675	14.9766	16.5217	8.59788	8.26826	7.82531	10.376	7.65046	9.09519	7.75461	Kif26b	269152
1450931_at	178.321	124.803	364.663	557.116	282.085	132.76	455.137	211.315	619.834	602.738	38.9451	67.2151	63.9648	10.937	7.54003	6.76121	9.09327	8.91217	10.4778	10.3795	Dock9	105445
1450478_a_at	84.007	481.85	1069.7	918.278	98.5859	639.286	1070.49	65.8739	1147.01	1164.65	102.853	86.9246	205.892	38.4609	33.4167	104.953	19.8181	19.8089	32.9775	21.3943	Ptpn12	19248
1422520_at	74.0364	19.8064	21.1966	28.7955	35.2337	28.3946	64.2537	114.745	108.608	58.5788	14.4021	51.5745	13.9965	14.5049	13.8065	12.7312	13.7552	13.643	14.3818	13.7785	Nefm	18040
1438410_at	105.62	26.3225	51.1621	359.53	178.302	73.093	165.557	239.227	310.522	272.841	19.0313	128.328	144.669	20.1631	10.0979	11.1677	10.2295	6.85602	10.866	10.3085	Prtg	235472
1436387_at	121.46	42.6034	96.3256	164.656	175.688	39.2582	135.055	211.206	145.274	188.124	33.1749	78.8289	25.8929	17.5038	18.5561	12.591	20.9213	20.2066	14.0828	21.0951	C330006P03Rik	320588
1437752_at	997.49	266.264	244.52	2159.92	1653.7	405.536	838.018	1651.55	1484.72	1558.9	309.455	1223.5	732.414	125.546	44.6536	12.8701	42.7964	11.5416	26.5919	14.6762	Lin28	83557
1439068_at	37.7035	8.66197	14.21	92.6957	58.4267	17.9024	53.4731	91.4639	68.8534	53.2644	13.4293	30.8203	22.0987	9.46917	8.59675	6.18393	8.54771	8.5411	7.24353	6.96139	Erap1	80898
1429831_at	143.748	46.2229	96.932	195.294	249.825	115.98	193.088	178.398	176.351	203.54	31.816	39.7793	8.03084	6.83551	7.90568	6.02457	7.83896	18.2983	7.18686	6.30256	Pik3ap1	83490
1449084_s_at	173.999	52.5138	58.5077	434.926	380.473	107.689	162.02	512.471	289.074	311.8	26.8241	301.634	160.785	49.5071	51.8678	12.4872	45.7738	7.94337	7.88158	7.19363	Sh3d19	27059
1420667_at	19.9843	10.2688	22.0677	25.6982	17.9995	37.2144	49.0508	45.3434	69.8464	37.4994	8.61433	12.5411	7.8538	7.5827	7.51047	7.27553	7.46713	7.45422	7.61551	7.47905	Doc2b	13447
1453015_at	196.647	58.1595	68.4233	626.887	440.874	74.6692	160.945	416.784	314.315	222.478	46.6197	363.686	220.577	20.6243	43.7275	20.052	54.1979	18.728	16.4856	20.537	4933407C03Rik	74440
1428663_at	67.1215	13.0905	47.7545	53.0897	46.6471	25.3232	54.2923	41.0722	46.0631	63.519	9.99581	9.24704	8.07293	8.48556	7.88461	6.01706	8.30738	7.35314	8.73226	8.36121	Sgms2	74442
1443669_at	36.0033	25.1719	21.6082	48.6482	63.8223	41.4026	135.917	115.394	128.836	90.4285	19.9125	42.0585	21.2167	19.7511	18.9789	19.3107	19.5562	27.1017	20.3465	19.3837	---	---
1444646_at	65.2783	19.7239	33.2594	192.483	101.674	39.4858	107.007	129.289	153.701	195.152	38.866	93.9104	35.5815	11.6084	9.52545	14.0607	9.69217	9.13186	13.6163	15.4723	8430420F16Rik	71498
1423644_at	57.2776	20.731	23.1021	157.175	108.862	45.3788	72.9154	103.593	110.428	79.5456	10.8056	80.9065	22.8439	7.14259	6.11453	5.72402	8.97818	5.96696	6.115	5.54702	Aco1	11428

## Sheet: Early Pachytene
#4-earlyPachytTop50
Probeset ID	Spermatogonia-PRJB02	Spermatogonia-PRJB05	Spermatogonia-PRJ07	Spermatogonia-PRJB08	pre-Leptotene-PRJB02	pre-Leptotene-PRJB05	pre-Leptotene-PRJB08	Leptotene/Zygotene-PRJB02	Leptotene/Zygotene-PRJB06	Leptotene/Zygotene-PRJB08	early-Pachytene-PRJB05	mid-Pachytene-PRJB04	mid-Pachytene-PRJB06	late-Pachytene-PRJB02	Diplotene-PRJB04	Diplotene-PRJB06	Round Spermatids-PRJB04	Round Spermatids-PRJB05	Round Spermatids-PRJB06	Round Spermatids-PRJB08	GeneSymbolAffy	EntrezIDAffy
1455930_at	987.138	23936.7	88.7717	863.123	875.576	56476.5	697.128	3109.64	239.601	773.12	14675.6	450.811	441.85	329.381	501.56	999.786	371.404	1028.36	1196.69	4119.66	---	---
1450140_a_at	332.966	1844.92	63.3304	61.5753	325.232	1652.37	56.948	285.763	51.6361	32.5516	715.191	50.9774	23.1336	23.5001	10.4496	14.9416	10.9857	22.7635	13.755	5.34676	Cdkn2a	12578
1453713_s_at	4.53353	7.63426	5.38055	4.63591	5.79855	5.68112	5.59772	5.65531	6.54466	11.2657	171.753	36.1807	176.159	16.2805	54.2405	286.709	521.285	1597.63	1659.13	436.166	4930546H06Rik	75202
1430223_at	6.02285	9.92871	5.97352	13.8648	6.83897	834.26	19.6001	221.907	2613.59	35.8603	1596.13	1402.34	13208.7	2052.01	1083.7	3805.27	119.58	147.135	110.455	66.9578	4930442P07Rik	74692
1432550_at	27.0129	77.1566	27.6453	33.8895	17.2986	54.5977	11.998	56.082	46.831	60.0568	1072.35	123.251	635.229	109.347	344.356	756.513	4466.81	5356.43	4414.48	1381.86	Tmem190	78052
1439739_at	987.915	1263.52	1317.26	118.069	916.192	2294.8	507.259	639.448	1631.02	192.081	2093.12	156.916	178.684	16.0515	36.141	8.34855	36.6771	8.28558	7.39424	7.21923	LOC100047259 /// Tsp50	100047259 /// 235631
1443661_at	13.8968	14.2362	8.37067	13.3015	10.2444	14.5217	12.4965	22.1592	9.29896	26.5463	332.822	50.6719	55.1535	37.4656	120.391	118.788	1886.31	1027.34	724.411	303.68	---	---
1429721_s_at	8.67428	18.615	14.3489	10.1085	7.33585	9.70432	6.98917	11.8897	12.0014	21.6397	290.88	66.8659	189.824	35.6553	132.221	322.793	944.703	1739.68	1684.24	496.825	4930579C15Rik	67753
1459443_at	10.2577	47.5388	5.03514	9.51681	10.2193	319.829	5.18251	10.181	8.9828	9.7592	99.9556	9.95667	9.56274	10.0823	11.3889	9.80958	15.4431	75.664	23.0291	28.3002	---	---
1433276_at	25.3279	45.3498	21.9651	24.5617	32.4126	639.469	44.9001	238.737	2891.06	75.2512	1112.6	1200.98	8364.95	1411.38	1099.6	2291.76	121	117.241	82.83	58.4927	4930556A12Rik	75333
1445662_x_at	8.22931	11.2494	6.11141	5.5837	11.1125	10.8219	10.6025	11.07	2.97569	10.6534	103.322	10.9726	11.2695	23.0771	32.8004	19.1973	21.7444	37.3438	12.1439	15.3878	---	---
1421754_at	1132.17	5564.6	276.687	658.858	1125.55	10757.6	712.857	1862.28	336.544	611.316	5954.92	1048.2	233.481	629.052	676.162	247.614	859.699	668.387	206.422	344.557	AY036118	170798
1432326_at	7.41465	11.2607	15.6386	8.93189	6.57348	11.9376	6.23578	8.85117	42.342	22.8122	167.719	15.2736	163.747	12.1154	57.8542	226.306	288.713	996.471	1174.87	378.65	1700042B14Rik	73347
1454078_a_at	102.484	67.8237	76.4446	9.46095	113.384	165.33	51.6778	84.9574	183.718	15.6906	197.346	31.5314	11.6662	14.9884	12.4205	13.9956	11.6135	17.4879	10.791	14.1387	Gal3st1	53897
1456133_x_at	130.184	139.929	70.6649	100.799	137.315	153.441	71.4877	153.167	86.4628	98.2485	630.512	96.3472	54.4708	45.811	50.0485	15.8466	60.2325	44.0261	35.4703	7.5321	Itgb5	16419
1418546_a_at	21.8938	59.8808	25.44	31.561	18.3063	36.1748	19.3905	35.4071	27.1261	54.2412	389.499	44.1643	249.502	38.1053	120.658	260.99	1438.61	1465.12	1815.7	894.284	Stambpl1	76630
1432812_at	8.00714	9.68167	4.82243	5.10331	5.46005	5.28775	5.13721	8.54377	5.18084	9.80108	79.0894	17.2237	19.0357	6.28994	45.8282	41.7061	570.484	338.464	268.162	11.6448	4930554P06Rik	75249
1432481_a_at	26.3873	49.9263	13.9589	18.001	14.8996	31.7249	13.0048	37.3806	17.8975	34.3701	347.167	64.8141	51.3666	37.9078	187.612	145.343	1392.42	1020.43	788.287	411.202	Lyzl6	69444
1441952_x_at	33.9707	21.2844	21.4963	11.514	89.0641	47.1383	32.6657	81.5223	40.6446	22.931	129.406	11.2975	8.41437	8.60878	5.10714	6.93077	4.40713	8.28311	5.2729	5.08489	Lynx1	23936
1425407_s_at	14.5291	16.5563	11.0397	11.6451	10.7017	10.673	9.61781	10.3972	9.48202	10.565	112.89	14.3789	48.5001	12.0987	36.4769	74.4752	533.537	589.455	428.636	101.974	Clec4a2 /// Clec4b1	26888 /// 69810
1424911_a_at	20.5475	56.3765	14.2408	21.9229	21.4337	26.1415	8.73118	28.4308	17.7923	42.0961	392.404	91.8288	202.066	44.313	175.22	229.964	1319.89	1958.5	1550.52	652.853	Lyzl4	69032
1454192_at	12.9368	30.4314	24.3723	13.4997	6.31992	31.0209	7.1485	18.0827	25.955	32.0028	257.201	39.5317	199.802	34.8483	121.426	332.463	880.993	1599.77	1385.59	479.714	4930579C15Rik	67753
1458356_at	7.87303	9.30738	7.69356	6.90204	9.70927	7.40715	7.43081	8.57878	6.94834	7.16381	83.4208	15.6793	19.3622	11.9828	12.3427	46.7525	214.048	370.666	184.103	32.6246	---	---
1429912_at	22.0071	101.98	17.8783	26.3062	5.15922	62.6742	5.87616	29.9613	31.3438	102.311	777.748	170.829	661.032	83.3027	264.72	813.911	2223.34	3976.87	3645.88	1184.55	LOC100045098 /// Spag4l	100045098 /// 76407
1429065_at	14.3116	18.2576	24.0338	35.4627	8.84066	24.8215	10.3919	8.14287	93.7126	8.94752	76.1269	10.9739	52.0222	8.55856	7.30666	9.30014	8.20837	8.28507	8.61964	7.39732	1200009F10Rik	67454
1421614_at	4.46132	4.47457	4.42858	4.09861	4.57555	5.16299	4.32758	5.32653	4.17182	4.2886	75.7127	19.6094	48.8088	13.8035	41.9141	88.9854	412.975	584.964	466.341	334.523	Zan	22635
1437792_at	150.053	334.465	66.4577	98.3796	10.6885	112.69	23.1604	100.134	83.433	205.134	1830.01	291.234	1098.05	137.754	598.177	1473.14	5440.37	6139.69	5354.83	2363.6	1700013D24Rik	76921
1436683_at	85.6364	122.969	54.0023	43.9851	56.1881	96.3825	48.2173	255.866	68.4518	63.8833	440.648	214.381	35.1405	39.6007	219.372	6.95605	261.673	36.2086	20.7207	4.73342	1700011M02Rik	75443
1420552_s_at	195.056	642.655	140.154	308.298	70.9836	377.474	65.2354	449.452	275.514	720.556	4931.03	1090.95	2081.66	614.508	1754.56	1791.19	9328.76	12203.8	9201.89	7150.28	Tsga8	60600
1432477_at	13.3039	15.4759	11.6634	9.83153	10.0388	13.0371	10.7179	15.2933	15.7702	15.0103	111.577	25.3422	99.3088	10.1651	53.188	159.269	434.852	727.54	1133.76	181.901	4930412D23Rik	73934
1417899_at	21.4994	149.017	39.8916	73.0414	18.7119	76.4752	15.6668	56.2294	87.9152	269.578	1490.02	272.351	973.181	133.628	517.706	1678.73	3449.05	8042.78	6619.27	2937.38	Zp3r	22789
1431648_at	16.8216	12.4836	19.9761	15.4521	50.7031	234.312	18.2529	297.95	842.081	72.6408	599.749	327.305	751.396	403.097	277.662	362.122	76.1979	93.5464	51.7944	47.0775	4930528F23Rik	75178
1419151_at	18.1346	44.9194	17.83	125.362	11.5697	38.8071	43.7733	42.7546	127.762	396.832	1612.3	268.216	2100.48	188.518	318.421	3075.22	1911.51	7219.68	13979.6	8368.92	100041548 /// 4930449I24Rik /// 622924	100041548 /// 622924 /// 67410
1430091_at	7.87958	21.9909	4.57884	8.27178	7.41475	11.5149	4.48914	20.2908	8.19051	28.7055	184.726	34.128	106.479	23.866	145.754	111.74	1042.96	930.98	768.859	239.323	1700001P01Rik	72215
1450198_at	37.8401	259.39	45.3618	60.2418	37.7602	96.2206	14.7036	85.0018	47.9607	194.333	1566.54	255.447	490.854	142.508	573.19	552.968	2805.29	4053.31	3584.08	2345.14	Dusp13	27389
1441564_at	8.54472	8.36271	10.1165	7.98994	10.2679	10.6382	7.77568	71.6016	72.2774	12.0682	70.5876	8.677	8.17647	8.65449	8.87971	7.68193	34.4545	58.7897	22.5468	52.2722	---	---
1431447_at	21.7742	55.4361	26.672	20.1726	15.7539	35.089	15.4598	28.3794	36.0671	53.8182	389.463	117.194	402.523	58.2483	195.672	837.495	2159.92	3944.64	3442.51	1024.49	4930432K09Rik	73779
1432146_at	42.2565	123.556	41.7518	38.7257	15.2132	48.6362	38.5735	54.6044	63.5838	83.5955	705.354	152.328	620.987	74.4522	249.185	811.54	3104.64	4787.32	4270.83	1290.59	Catsper3	76856
1429705_at	35.1916	66.1806	21.2766	24.2567	17.4884	56.4057	16.9338	49.8758	32.1977	50.5231	403.521	66.1822	177.098	52.9323	191.583	254.194	1790.28	1449.63	1316.03	538.126	Spaca4	69363
1418878_at	112.2	434.647	144.645	195.903	33.3285	240.132	32.291	256.241	306.5	549.955	3336.53	894.259	3740.32	467.826	1453.4	4441.12	7598.06	16497	16452.3	5599.08	Acrv1	11451
1456671_at	16.7493	16.0294	12.9485	12.5956	17.7881	41.2186	16.351	15.9348	26.3286	15.7443	113.286	17.0125	24.8571	17.2025	17.2472	23.2578	17.9016	18.0811	18.6974	21.7259	Tbrg3	21378
1437384_at	41.0425	110.375	32.2907	40.4757	14.1647	33.0425	7.61052	65.1826	25.6255	93.934	685.11	111.642	266.612	106.612	344.735	339.385	2255.06	1638.84	1780.78	1276.49	1700015E13Rik	76925
1430235_at	10.1568	55.9844	7.50054	15.3473	8.16927	18.4086	9.14137	7.42817	20.1668	40.4368	572.154	125.565	279.889	191.289	291.464	513.912	1449.03	2192.7	2103.89	832.69	4933424G06Rik	71166
1420717_at	18.4433	33.7364	9.64061	20.1132	12.0222	13.6032	10.0784	26.3769	15.6386	86.3673	480.588	67.3458	101.694	88.8912	318.845	443.923	2002.39	2606.77	1660.03	1869.2	A930018P22Rik	68243
1432482_at	57.8728	180.39	53.7859	74.9652	14.3345	67.5901	25.5507	100.015	106.251	235.481	1328.29	325.124	951.013	190.223	858.672	1079.85	4889.74	4705.65	5028.48	2169.45	Lyzl6	69444
1430211_at	51.1796	99.6658	10.6922	6.33639	12.2056	39.9069	6.92122	51.9341	10.188	11.8616	543.848	92.8839	82.7966	98.9331	228.06	155.729	2782.08	2520.42	867.259	178.908	4930415O20Rik	73863
1430968_at	5.2613	12.8752	4.73618	6.60758	4.80831	8.55036	4.46589	9.0654	6.48735	10.2929	75.8955	31.4693	52.6292	11.6477	55.2038	109.872	602.254	481.592	587.554	253.849	4930517O19Rik	75075
1449892_at	51.213	124.92	26.6479	35.4408	14.9202	37.4032	13.6598	60.7728	50.6168	73.3514	766.388	186.707	631.889	124.818	424.834	782.731	2760.32	2949.52	3498.23	944.241	Lyzl1	67328
1441737_s_at	426.03	1286.81	407.523	422.929	632.079	1283.11	419.469	688.816	603.676	618.08	7301.07	2006.94	2678.26	3238.58	3105.88	2999.04	1273.54	1415.76	1126.99	1035.55	Rassf1	56289
1453962_at	58.1574	187.139	19.3947	11.3486	8.5199	39.1425	10.8059	43.1099	22.7332	38.9849	422.734	71.0203	192.699	68.1259	198.913	238.264	2236.03	1545.14	1290.56	708.567	Pfn3	75477

## Sheet: Mid Pachytene
#5-mid-pachytTop50
Probeset ID	Spermatogonia-PRJB02	Spermatogonia-PRJB05	Spermatogonia-PRJ07	Spermatogonia-PRJB08	pre-Leptotene-PRJB02	pre-Leptotene-PRJB05	pre-Leptotene-PRJB08	Leptotene/Zygotene-PRJB02	Leptotene/Zygotene-PRJB06	Leptotene/Zygotene-PRJB08	early-Pachytene-PRJB05	mid-Pachytene-PRJB04	mid-Pachytene-PRJB06	late-Pachytene-PRJB02	Diplotene-PRJB04	Diplotene-PRJB06	Round Spermatids-PRJB04	Round Spermatids-PRJB05	Round Spermatids-PRJB06	Round Spermatids-PRJB08	GeneSymbolAffy	EntrezIDAffy
1433198_at	8.93425	9.85129	6.45591	15.8968	8.12553	79.4979	5.52716	44.9783	436.169	32.9916	239.111	758.272	5628.53	1089.94	855.587	1754.74	53.1211	63.8936	53.9523	15.4524	4930445B03Rik	74867
1432694_at	7.60628	7.98214	12.1391	11.5337	9.90425	12.3649	13.401	15.2242	96.3695	12.5821	57.7944	320.113	1747.26	782.185	326.028	547.656	21.5279	20.5005	19.6183	27.1392	4921527H02Rik	70929
1430223_at	6.02285	9.92871	5.97352	13.8648	6.83897	834.26	19.6001	221.907	2613.59	35.8603	1596.13	1402.34	13208.7	2052.01	1083.7	3805.27	119.58	147.135	110.455	66.9578	4930442P07Rik	74692
1454139_at	9.40986	25.6269	3.67213	8.94196	6.02085	49.6128	7.93759	44.1245	348.747	77.1791	550.253	2348.93	10689.8	3254.36	2863.66	4839.22	260.606	298.262	229.9	86.1651	4930405N21Rik	73797
1428525_at	6.92371	7.73799	7.65043	7.16383	7.93066	8.14612	9.40796	11.1963	28.0973	8.68127	17.8058	280.699	364.604	609.572	402.882	291.061	30.1176	15.7015	10.4495	7.85483	4930488B01Rik	75036
1433351_at	8.12478	21.3752	8.67272	12.1233	8.38206	45.1955	8.5731	26.4869	268.003	33.9024	139.255	606.96	6879.15	1014.55	1255.66	3793.1	75.1994	132.019	128.83	68.3755	4933412L11Rik	74078
1433276_at	25.3279	45.3498	21.9651	24.5617	32.4126	639.469	44.9001	238.737	2891.06	75.2512	1112.6	1200.98	8364.95	1411.38	1099.6	2291.76	121	117.241	82.83	58.4927	4930556A12Rik	75333
1446643_at	7.64948	8.75959	7.70162	9.58919	8.45187	78.3938	10.5381	25.6646	228.533	20.4797	237.212	839.631	4478.69	1303.95	1231.9	2630.97	166.494	220.898	72.6374	25.7439	5330409N07Rik	319766
1456202_at	9.35854	9.89305	8.36261	8.65302	9.55571	20.0348	9.04176	31.3012	107.552	25.2149	95.7593	440.018	2779.72	859.536	611.044	1381.87	81.6304	97.1891	68.3856	11.5129	Elfn2	207393
1443290_at	8.53841	11.8796	10.1318	11.8209	11.9712	7.55505	11.6396	11.8454	15.6327	11.5241	12.0544	301.152	243.289	598.658	389.354	207.843	43.7589	62.701	58.8827	13.4796	---	---
1436470_at	5.50667	5.48576	5.39565	5.04515	5.58925	5.31963	5.29276	9.5499	8.98774	6.58065	6.08269	243.431	173.016	378.377	225.466	145.612	20.2917	28.4711	13.833	7.9797	Rims2	116838
1454536_at	7.86478	7.44525	6.94377	8.09269	7.92849	7.50944	7.61199	12.0213	37.4382	26.0892	21.8761	393.573	1049.22	735.321	837.315	1472.84	40.5662	140.766	57.6205	52.2868	Tmem30c	71027
1434474_at	45.9487	46.0508	72.2718	22.3065	32.7609	148.186	38.9562	72.6386	367.463	25.555	208.446	753.234	3628.02	564.778	429.2	998.74	54.0116	100.967	97.9264	71.5959	Abca5	217265
1419163_s_at	8.2582	16.9614	17.0794	21.7949	11.624	28.7463	13.9461	21.0378	190.4	30.3283	131.234	166.834	1719.09	266.16	167.962	593.381	11.5493	31.9638	26.9236	13.9105	Dnajc3	100037258
1431806_at	17.4601	29.6294	5.05993	13.971	9.48848	29.1182	15.7397	70.7271	138.255	127.98	273.936	2122.1	4385.45	3256.4	3624.3	6241.82	625.915	479.38	420.566	187.151	4931408D14Rik	77059
1446524_at	7.74831	7.73343	7.61653	6.35398	7.93407	6.84054	7.1161	7.84755	14.5355	11.9248	9.23243	130.468	463.471	196.236	371.025	894.381	34.0751	87.0901	88.4706	45.2755	---	---
1447534_at	9.20904	41.4492	5.55806	9.12043	5.79304	133.362	9.60758	187.895	881.787	83.0685	445.037	1763.35	10218	3217.93	2434.99	6038.72	324.398	323.804	270.605	77.5072	---	---
1433073_at	4.74331	4.93965	4.37225	5.19542	5.00089	44.2632	4.65116	34.6628	187.402	18.1633	154.238	379.651	2081.96	772.275	343.303	637.346	54.1721	148.857	117.172	44.9747	4933425E08Rik	71127
1429472_at	4.66274	9.35001	5.25624	4.92031	6.1007	8.91707	4.54107	26.9596	166.908	15.0584	100.854	795.856	4880.7	1197.87	1090.56	3686.83	130.962	169.539	215.288	121.167	4921525O09Rik	74050
1442537_at	38.892	15.5291	16.3098	30.6951	15.9004	9.05073	14.979	18.5128	15.4002	20.4789	14.2248	365.003	319.543	637.455	579.321	386.418	51.7247	49.5817	16.1458	16.0172	---	---
1418736_at	60.9222	29.8684	32.1161	84.3947	55.7929	145.142	39.5893	320.361	695.579	153.258	841.248	2191.08	4448.64	1603.29	987.276	1058.82	262.16	209.138	135.611	126.298	B3galnt1	26879
1424357_at	8.96665	9.39205	8.85223	8.58718	9.56083	8.72753	9.51954	12.7826	18.9648	20.4383	42.6023	370.384	683.684	460.504	375.931	399.85	214.438	213.293	176.96	128.859	Tmem45b	235135
1441755_at	5.27814	6.26806	3.81055	5.73562	5.29821	6.27884	5.18574	11.9126	14.0163	11.907	20.5097	138.512	514.799	243.753	452.937	608.568	91.3415	87.6047	62.1743	39.4645	Mapk15	332110
1443960_at	8.1935	8.8429	9.12183	11.1678	8.3506	9.43497	8.4842	17.1071	16.2477	13.3911	19.5032	407.298	194.806	701.074	529.206	220.656	36.8104	73.9898	20.8374	42.5238	---	---
1459321_at	4.85278	4.83828	4.6002	4.40009	4.72658	4.78998	4.74794	4.62158	17.9394	4.61368	5.19612	50.5382	456.66	115.855	155.589	642.603	10.1534	48.6711	50.7687	6.37612	---	---
1426190_at	21.1931	28.2622	18.8993	21.283	13.8398	35.9818	26.3885	71.8006	316.873	54.0229	156.201	861.151	5679.27	968.523	974.061	3559.94	311.557	241.054	243.716	142.607	Aym1	503692
1459661_at	7.39584	7.85316	6.3359	6.62604	7.70995	5.88931	7.30518	8.93676	8.75065	6.64083	9.83694	158.824	135.904	500.519	260.921	172.81	32.4021	33.3076	18.6896	15.3721	Dcdc2a	195208
1443831_s_at	37.2971	30.2736	13.5346	11.2939	26.1529	99.3941	17.1916	330.023	383.062	78.5529	761.241	3744.15	2499.73	4444.48	2352.37	878.008	526.713	317.132	103.954	47.2754	Mtl5	17771
1433887_at	114.419	76.104	119.278	113.834	141.15	218.021	68.0793	281.325	906.54	171.29	464.781	1444.54	3888.22	1320.42	1016.42	1326.04	123.352	156.742	101.855	75.0495	Dnajc3	100037258
1435417_at	4.56761	4.71911	5.76007	13.1531	9.59833	16.046	12.9106	17.0054	16.6356	15.7272	13.5461	201.782	292.436	435.199	301.494	265.542	18.4977	34.7263	19.4144	17.151	AI464131	329828
1441220_at	10.9344	10.876	9.83082	6.05013	11.083	12.9073	9.56333	10.8485	17.4966	11.6744	21.3085	127.222	407.314	212.88	404.324	1389.69	14.3915	32.6516	52.9584	21.9239	---	---
1449147_at	58.7272	101.792	48.4245	48.6824	100.989	243.475	118.206	375.516	870.591	342.719	1026.89	4581.34	9210.1	6006.9	4694.09	6008.24	898.725	924.363	535.837	383.948	Chst1	76969
1447223_at	12.1222	8.37915	7.09511	9.08849	6.3421	9.11	9.22535	15.9523	26.7364	9.72776	59.5774	205.585	242.46	203.221	218.785	73.4688	35.5452	17.2645	8.81428	16.028	---	---
1432833_at	20.2889	34.0239	7.31006	25.345	11.4525	34.2468	17.2649	118.589	347.454	131.73	427.329	2891.79	8492.59	5213.27	4290.81	4915.78	501.812	542.015	365.169	446.117	4933435G04Rik	71237
1433109_at	14.6545	14.6342	15.852	14.9773	16.9263	15.0801	13.8654	19.2757	80.5971	20.4024	112.865	562.876	1334.72	899.592	766.988	762.131	99.6646	144.073	132.829	45.629	Mif	17319
1447836_x_at	20.4445	71.6987	10.6554	27.6929	11.6263	112.35	24.0421	210.703	531.799	252.084	773.258	4696.89	12819.5	6187.23	5382.06	10160.9	1123.8	1026.33	716.893	609.556	4921525O09Rik	74050
1439571_at	11.3964	7.5967	12.6317	10.8792	7.79029	11.2633	11.8104	15.2993	22.7171	16.703	18.5292	264.48	283.741	387.505	235.993	139.819	27.109	22.5749	21.8897	22.2745	E230008J23Rik	319683
1458567_at	45.2956	49.9778	44.7711	35.2749	39.6626	48.9567	49.2625	50.161	106.15	91.146	124.57	914.45	2670.28	1416.84	1587.45	1764.49	297.449	155.895	188.424	207.445	D130017N08Rik	320064
1454470_at	14.9571	13.975	16.3978	17.3962	9.25864	19.9465	12.5366	63.2347	178.33	91.0319	132.657	1578.02	2761.14	2567.3	2422.72	1712	341.507	236.591	246.121	203.031	4930404F17Rik	73817
1435827_at	53.6699	54.1484	93.6218	31.5935	44.6209	54.6559	55.2382	84.8747	183.318	55.9255	160.219	1262.75	1993.9	1625.87	958.006	843.275	146.528	166.064	207.553	66.9974	4933404O12Rik	66752
1441488_at	6.04559	7.36681	7.30163	6.81141	7.50994	7.12386	7.19366	7.35392	7.93843	7.41681	7.62925	125.991	129.666	334.519	283.388	195.71	47.5306	56.674	40.4657	7.51715	---	---
1431967_at	6.64612	16.1063	8.18898	11.7996	6.76257	29.5916	7.40885	69.7312	532.703	294.522	734.146	3201.16	14396.7	4891.12	4566.71	10535.7	630.375	867.729	764.996	536.515	1700006A11Rik	71824
1459282_at	4.21441	4.0511	4.18667	3.91604	4.27478	6.50474	4.08447	4.21315	7.34815	4.01976	21.422	69.5149	224.792	281.533	190.458	258.564	5.1974	27.1783	4.4177	4.68301	---	---
1434918_at	4.89524	6.71325	6.65747	6.60169	7.17363	10.1774	7.41122	7.18688	11.8681	12.7077	13.9011	179.195	154.055	402.896	384.402	185.763	43.7147	121.675	110.575	37.8982	Sox6	20679
1433637_at	8.90793	11.2447	9.65592	7.9683	9.69037	13.823	7.97311	11.1384	17.6333	10.8812	10.7501	113.062	214.042	182.651	146.312	122.402	27.2178	57.3183	17.9654	11.4352	Adck2	57869
1447218_at	3.9862	4.31795	8.79283	5.25891	4.12855	3.87771	4.07259	13.3732	26.1651	14.8381	8.76478	161.708	381.179	220.395	276.018	418.236	173.209	290.755	323.807	248.865	1110003F02Rik	68466
1438873_at	34.5129	19.5325	16.7261	28.1339	29.8229	53.9823	24.8981	104.861	185.188	136.351	196.101	957.16	5424.47	2237.95	1987.96	6950.57	324.936	325.381	445.855	215.75	Zfp389	100038371
1416474_at	7.49065	7.37723	7.4037	28.9521	7.57765	6.99237	7.05398	8.80112	10.0486	7.21352	8.91181	119.08	119.813	95.17	147.692	115.548	13.0053	22.6512	9.30277	10.4884	Igdcc4	56741
1432832_at	6.39725	5.35989	6.53696	6.48102	6.7673	6.58123	5.35826	6.84302	11.4064	6.54922	7.0312	76.9492	185.283	146.332	146.59	177.319	29.9174	16.2015	8.19997	21.4662	4933435G04Rik	71237
1439331_at	5.07527	6.18463	4.89207	5.40388	6.40418	7.46242	5.88237	6.73065	14.4595	10.9792	23.972	124.697	418.719	270.989	370.7	705.733	65.3895	105.874	43.1209	36.3882	4932439E07Rik	103405

## Sheet: Late Pachytene
#6-latePachyt-Top50
Probeset ID	Spermatogonia-PRJB02	Spermatogonia-PRJB05	Spermatogonia-PRJ07	Spermatogonia-PRJB08	pre-Leptotene-PRJB02	pre-Leptotene-PRJB05	pre-Leptotene-PRJB08	Leptotene/Zygotene-PRJB02	Leptotene/Zygotene-PRJB06	Leptotene/Zygotene-PRJB08	early-Pachytene-PRJB05	mid-Pachytene-PRJB04	mid-Pachytene-PRJB06	late-Pachytene-PRJB02	Diplotene-PRJB04	Diplotene-PRJB06	Round Spermatids-PRJB04	Round Spermatids-PRJB05	Round Spermatids-PRJB06	Round Spermatids-PRJB08	GeneSymbolAffy	EntrezIDAffy
1428525_at	6.92371	7.73799	7.65043	7.16383	7.93066	8.14612	9.40796	11.1963	28.0973	8.68127	17.8058	280.699	364.604	609.572	402.882	291.061	30.1176	15.7015	10.4495	7.85483	4930488B01Rik	75036
1459661_at	7.39584	7.85316	6.3359	6.62604	7.70995	5.88931	7.30518	8.93676	8.75065	6.64083	9.83694	158.824	135.904	500.519	260.921	172.81	32.4021	33.3076	18.6896	15.3721	Dcdc2a	195208
1443290_at	8.53841	11.8796	10.1318	11.8209	11.9712	7.55505	11.6396	11.8454	15.6327	11.5241	12.0544	301.152	243.289	598.658	389.354	207.843	43.7589	62.701	58.8827	13.4796	---	---
1432694_at	7.60628	7.98214	12.1391	11.5337	9.90425	12.3649	13.401	15.2242	96.3695	12.5821	57.7944	320.113	1747.26	782.185	326.028	547.656	21.5279	20.5005	19.6183	27.1392	4921527H02Rik	70929
1443960_at	8.1935	8.8429	9.12183	11.1678	8.3506	9.43497	8.4842	17.1071	16.2477	13.3911	19.5032	407.298	194.806	701.074	529.206	220.656	36.8104	73.9898	20.8374	42.5238	---	---
1436470_at	5.50667	5.48576	5.39565	5.04515	5.58925	5.31963	5.29276	9.5499	8.98774	6.58065	6.08269	243.431	173.016	378.377	225.466	145.612	20.2917	28.4711	13.833	7.9797	Rims2	116838
1436087_at	5.10608	5.19474	5.0866	4.65498	5.35721	4.96458	4.90803	5.11092	5.15542	14.4247	5.55031	123.855	43.0609	372.886	501.033	260.883	353.851	238.377	289.967	96.5256	Dpp10 /// LOC100047231	100047231 /// 269109
1441488_at	6.04559	7.36681	7.30163	6.81141	7.50994	7.12386	7.19366	7.35392	7.93843	7.41681	7.62925	125.991	129.666	334.519	283.388	195.71	47.5306	56.674	40.4657	7.51715	---	---
1442537_at	38.892	15.5291	16.3098	30.6951	15.9004	9.05073	14.979	18.5128	15.4002	20.4789	14.2248	365.003	319.543	637.455	579.321	386.418	51.7247	49.5817	16.1458	16.0172	---	---
1434918_at	4.89524	6.71325	6.65747	6.60169	7.17363	10.1774	7.41122	7.18688	11.8681	12.7077	13.9011	179.195	154.055	402.896	384.402	185.763	43.7147	121.675	110.575	37.8982	Sox6	20679
1433182_at	4.21148	5.42212	5.37797	3.98248	4.15118	4.9109	4.07789	4.39093	7.6979	8.30434	5.5584	133.151	76.3209	287.381	268.464	169.124	60.4958	139.818	117.06	110.773	4930431N21Rik	74623
1423843_at	18.0561	17.9535	17.7791	18.3382	16.6528	15.2408	15.0611	22.6501	17.7715	16.5529	22.5769	209.19	190.959	647.981	631.587	291.481	54.3346	92.8682	37.4567	44.4114	Lrrc61	243371
1459282_at	4.21441	4.0511	4.18667	3.91604	4.27478	6.50474	4.08447	4.21315	7.34815	4.01976	21.422	69.5149	224.792	281.533	190.458	258.564	5.1974	27.1783	4.4177	4.68301	---	---
1435939_s_at	7.58491	7.58934	8.03745	10.4455	7.80964	6.98161	7.31169	8.68768	6.60969	8.62262	8.81001	65.7347	57.7078	281.403	120.579	59.9408	7.70666	9.86035	8.30921	7.23735	Hepacam2	101202
1456656_at	8.40573	8.76048	6.31254	4.86363	8.59675	8.1267	5.43267	8.36399	8.06045	8.19851	8.9002	48.46	34.6029	278.828	233.604	44.5214	75.4982	102.554	12.9257	14.6681	Lin7a	108030
1440409_at	5.27147	5.25627	5.19521	7.05214	5.37806	6.10807	5.15537	5.41664	6.6399	8.32509	9.91638	77.9458	44.1106	273.443	294.75	206.5	82.6586	67.5875	60.5884	30.987	Gcnt3	72077
1432347_at	15.046	10.6934	10.2887	11.3148	10.6896	9.99612	9.9963	13.3691	12.6994	13.0816	20.5185	250.902	124.706	460.563	369.524	99.523	72.9648	44.3512	36.902	30.9413	4931428L18Rik	70988
1435417_at	4.56761	4.71911	5.76007	13.1531	9.59833	16.046	12.9106	17.0054	16.6356	15.7272	13.5461	201.782	292.436	435.199	301.494	265.542	18.4977	34.7263	19.4144	17.151	AI464131	329828
1435022_at	8.82061	10.118	9.7093	8.54917	10.3709	8.59734	8.55684	10.0692	8.64975	9.54996	12.008	105.939	30.1712	279.16	244.759	116.557	79.7755	90.672	25.6042	11.4818	Alx1	216285
1454567_at	9.69197	7.77066	7.69834	7.306	7.92189	7.7289	3.24105	8.43496	8.16264	9.47324	10.108	35.239	29.1428	255.422	243.632	91.3677	251.499	212.179	157.026	45.8456	4933404K13Rik	71018
1457030_at	5.5854	5.56262	5.44899	4.18537	5.62824	4.34676	5.33042	5.54597	4.48928	9.03325	10.3819	54.1481	50.928	253.549	353.084	305	115.987	172.405	158.45	89.0281	Mirg	373070
1433306_at	7.61356	15.8239	5.46416	7.64695	7.8294	4.93356	6.96765	15.7444	14.7465	45.5748	49.3292	493.915	358.799	1201.34	939.482	761.913	266.147	274.071	284.816	124.578	4930456K20Rik	74898
1458395_at	11.5317	23.3983	18.738	17.1142	9.95136	25.9086	12.6601	29.8394	28.2758	36.3638	67.7254	470.033	256.672	1293.94	1015.59	402.681	186.334	203.658	90.9919	101.683	B930054O08	327837
1454196_at	9.04719	7.4908	7.25592	9.57606	7.55011	9.91034	7.0418	7.30835	11.9101	17.806	19.4567	186.543	114.461	459.4	322.813	222.36	70.3891	107.708	64.4359	20.587	4930568A13Rik	75902
1447655_x_at	5.77664	5.77385	5.78891	7.7812	8.85567	9.61643	7.12565	10.8729	10.8361	13.6222	11.924	98.9031	71.1016	304.522	254.201	111.058	90.9568	51.072	64.1999	13.4268	Sox6	20679
1448557_at	13.9533	6.17556	5.94146	28.7374	18.5585	5.74069	6.20352	24.4144	14.897	21.8778	7.44092	244.875	154.271	551.213	385.088	234.739	35.7551	54.5077	32.8058	23.0955	Fam13c	71721
1454536_at	7.86478	7.44525	6.94377	8.09269	7.92849	7.50944	7.61199	12.0213	37.4382	26.0892	21.8761	393.573	1049.22	735.321	837.315	1472.84	40.5662	140.766	57.6205	52.2868	Tmem30c	71027
1426231_at	7.7393	11.2684	7.32726	11.8239	7.58762	9.00427	7.41002	7.37176	16.4343	24.6785	17.542	128.92	140.106	479.386	365.635	268.31	255.773	224.989	255.72	195.543	Vit	74199
1429096_at	9.36341	10.7481	11.1369	9.95922	10.9895	10.3818	10.3868	10.7205	17.0759	22.6313	11.976	115.448	130.093	439.733	434.305	351.991	143.082	252.394	259.951	269.896	2810455D13Rik	72810
1442407_at	18.0879	18.4451	13.55	8.47123	18.6993	10.8648	10.518	20.5706	18.9489	15.2965	45.0388	148.334	116.7	501.677	274.589	128.051	26.5888	55.496	25.2672	33.8757	---	---
1428536_at	5.2733	7.15657	5.20298	4.76113	5.27739	4.65158	4.9622	5.23479	8.05039	13.0398	6.58847	68.6004	66.4545	230.822	293.793	232.101	216.347	219.788	201.374	247.959	Kcng4	66733
1430323_at	8.19266	8.19037	7.88958	8.7049	9.6065	6.90432	7.6522	8.79039	12.9636	8.90995	8.50136	70.5386	35.1988	217.371	164.014	64.9421	10.2698	9.10229	10.6348	34.5099	1700049E17Rik1	666214
1445583_x_at	4.84868	4.32568	4.45364	4.68906	4.94728	4.545	4.82923	4.87075	10.9137	29.5598	21.5365	156.056	237.103	554.762	727.074	718.202	228.998	153.094	127.393	68.5569	---	---
1427012_at	5.8525	7.17253	5.83711	6.32787	5.89973	5.66644	5.48622	7.39166	8.55568	9.01089	7.62381	52.5472	74.2868	216.716	166.553	98.35	84.5477	78.0042	63.9634	50.7087	Lancl1	14768
1443831_s_at	37.2971	30.2736	13.5346	11.2939	26.1529	99.3941	17.1916	330.023	383.062	78.5529	761.241	3744.15	2499.73	4444.48	2352.37	878.008	526.713	317.132	103.954	47.2754	Mtl5	17771
1459923_at	6.60517	6.5957	6.51393	6.18712	6.65175	6.00452	6.26297	7.70234	6.1876	6.02119	8.15247	20.8723	9.35154	210.587	210.709	81.3511	81.5568	44.0006	11.473	13.064	Bex6	328660
1431868_at	8.18467	8.15142	8.00506	7.7956	10.3909	8.23027	7.66426	22.7611	10.9949	12.201	49.4751	255.243	95.002	760.516	625.131	251.468	297.927	225.354	182.498	126.755	---	---
1457525_at	3.89879	3.31589	3.8292	8.81175	4.03323	3.80991	4.41647	10.5678	9.18012	10.1552	3.45743	129.974	73.6927	217.425	138.705	68.3864	38.3453	34.8344	10.7972	10.6558	---	---
1430400_at	9.0678	9.08089	8.94514	7.66267	13.9865	7.93703	8.90452	14.0491	16.8012	19.3837	45.1359	160.739	78.2243	491.503	389.406	323.224	88.2051	138.181	146.274	27.6146	4930521A18Rik	74708
1419239_at	7.61502	7.68776	7.62935	7.17531	7.73959	7.04126	7.34134	8.5554	7.48832	15.8978	13.6279	117.307	45.544	307.176	345.079	220.854	191.278	204.44	197.06	202.042	Zfp54	22712
1454139_at	9.40986	25.6269	3.67213	8.94196	6.02085	49.6128	7.93759	44.1245	348.747	77.1791	550.253	2348.93	10689.8	3254.36	2863.66	4839.22	260.606	298.262	229.9	86.1651	4930405N21Rik	73797
1444417_at	5.41031	8.81563	5.34812	8.61475	6.31299	8.95833	6.11448	11.5466	12.7124	15.4361	13.1459	38.4225	112.595	292.15	190.577	110.017	102.057	158.765	126.478	153.093	9330101J02Rik	664857
1433198_at	8.93425	9.85129	6.45591	15.8968	8.12553	79.4979	5.52716	44.9783	436.169	32.9916	239.111	758.272	5628.53	1089.94	855.587	1754.74	53.1211	63.8936	53.9523	15.4524	4930445B03Rik	74867
1431806_at	17.4601	29.6294	5.05993	13.971	9.48848	29.1182	15.7397	70.7271	138.255	127.98	273.936	2122.1	4385.45	3256.4	3624.3	6241.82	625.915	479.38	420.566	187.151	4931408D14Rik	77059
1416804_at	8.67476	8.97194	7.20155	12.3475	6.30384	7.21146	8.06125	7.43194	10.3623	9.02484	9.00911	98.5171	29.7586	223.218	171.427	87.8608	52.0733	71.1518	44.4616	44.6425	Ehbp1l1	114601
1455340_at	114.018	40.7875	124.005	57.5865	90.5403	64.9166	111.945	92.8199	99.5998	103.869	95.9846	1147.22	842.451	2178.48	1561.51	825.075	165.542	197.313	191.008	73.7522	Dennd5b	320560
1428571_at	7.79122	7.80969	7.72187	8.9465	8.08577	7.26343	5.32103	7.95991	7.74519	11.9719	8.34388	79.2826	42.3498	201.423	243.659	185.341	136.256	136.026	170.08	105.819	Col9a1	12839
1442743_at	20.2978	13.607	14.1757	11.6524	13.8939	12.1235	13.2467	16.3074	22.1646	12.7291	13.6411	80.2797	48.4092	271.98	137.192	63.0489	15.1972	13.6	14.0782	13.2798	---	---
1439571_at	11.3964	7.5967	12.6317	10.8792	7.79029	11.2633	11.8104	15.2993	22.7171	16.703	18.5292	264.48	283.741	387.505	235.993	139.819	27.109	22.5749	21.8897	22.2745	E230008J23Rik	319683
1436630_at	8.05679	7.02582	6.9992	7.74957	6.34951	6.50964	6.92175	7.02586	9.01519	17.0098	10.8176	62.2352	61.8055	265.387	346.552	256.676	178.937	167.792	149.757	76.2678	---	---

## Sheet: Diplotene
#7-DiploteneTop50
Probeset ID	Spermatogonia-PRJB02	Spermatogonia-PRJB05	Spermatogonia-PRJ07	Spermatogonia-PRJB08	pre-Leptotene-PRJB02	pre-Leptotene-PRJB05	pre-Leptotene-PRJB08	Leptotene/Zygotene-PRJB02	Leptotene/Zygotene-PRJB06	Leptotene/Zygotene-PRJB08	early-Pachytene-PRJB05	mid-Pachytene-PRJB04	mid-Pachytene-PRJB06	late-Pachytene-PRJB02	Diplotene-PRJB04	Diplotene-PRJB06	Round Spermatids-PRJB04	Round Spermatids-PRJB05	Round Spermatids-PRJB06	Round Spermatids-PRJB08	GeneSymbolAffy	EntrezIDAffy
1441220_at	10.9344	10.876	9.83082	6.05013	11.083	12.9073	9.56333	10.8485	17.4966	11.6744	21.3085	127.222	407.314	212.88	404.324	1389.69	14.3915	32.6516	52.9584	21.9239	---	---
1446524_at	7.74831	7.73343	7.61653	6.35398	7.93407	6.84054	7.1161	7.84755	14.5355	11.9248	9.23243	130.468	463.471	196.236	371.025	894.381	34.0751	87.0901	88.4706	45.2755	---	---
1436087_at	5.10608	5.19474	5.0866	4.65498	5.35721	4.96458	4.90803	5.11092	5.15542	14.4247	5.55031	123.855	43.0609	372.886	501.033	260.883	353.851	238.377	289.967	96.5256	Dpp10 /// LOC100047231	100047231 /// 269109
1454536_at	7.86478	7.44525	6.94377	8.09269	7.92849	7.50944	7.61199	12.0213	37.4382	26.0892	21.8761	393.573	1049.22	735.321	837.315	1472.84	40.5662	140.766	57.6205	52.2868	Tmem30c	71027
1457030_at	5.5854	5.56262	5.44899	4.18537	5.62824	4.34676	5.33042	5.54597	4.48928	9.03325	10.3819	54.1481	50.928	253.549	353.084	305	115.987	172.405	158.45	89.0281	Mirg	373070
1428525_at	6.92371	7.73799	7.65043	7.16383	7.93066	8.14612	9.40796	11.1963	28.0973	8.68127	17.8058	280.699	364.604	609.572	402.882	291.061	30.1176	15.7015	10.4495	7.85483	4930488B01Rik	75036
1459321_at	4.85278	4.83828	4.6002	4.40009	4.72658	4.78998	4.74794	4.62158	17.9394	4.61368	5.19612	50.5382	456.66	115.855	155.589	642.603	10.1534	48.6711	50.7687	6.37612	---	---
1441755_at	5.27814	6.26806	3.81055	5.73562	5.29821	6.27884	5.18574	11.9126	14.0163	11.907	20.5097	138.512	514.799	243.753	452.937	608.568	91.3415	87.6047	62.1743	39.4645	Mapk15	332110
1433351_at	8.12478	21.3752	8.67272	12.1233	8.38206	45.1955	8.5731	26.4869	268.003	33.9024	139.255	606.96	6879.15	1014.55	1255.66	3793.1	75.1994	132.019	128.83	68.3755	4933412L11Rik	74078
1431806_at	17.4601	29.6294	5.05993	13.971	9.48848	29.1182	15.7397	70.7271	138.255	127.98	273.936	2122.1	4385.45	3256.4	3624.3	6241.82	625.915	479.38	420.566	187.151	4931408D14Rik	77059
1445583_x_at	4.84868	4.32568	4.45364	4.68906	4.94728	4.545	4.82923	4.87075	10.9137	29.5598	21.5365	156.056	237.103	554.762	727.074	718.202	228.998	153.094	127.393	68.5569	---	---
1439331_at	5.07527	6.18463	4.89207	5.40388	6.40418	7.46242	5.88237	6.73065	14.4595	10.9792	23.972	124.697	418.719	270.989	370.7	705.733	65.3895	105.874	43.1209	36.3882	4932439E07Rik	103405
1428536_at	5.2733	7.15657	5.20298	4.76113	5.27739	4.65158	4.9622	5.23479	8.05039	13.0398	6.58847	68.6004	66.4545	230.822	293.793	232.101	216.347	219.788	201.374	247.959	Kcng4	66733
1440409_at	5.27147	5.25627	5.19521	7.05214	5.37806	6.10807	5.15537	5.41664	6.6399	8.32509	9.91638	77.9458	44.1106	273.443	294.75	206.5	82.6586	67.5875	60.5884	30.987	Gcnt3	72077
1442537_at	38.892	15.5291	16.3098	30.6951	15.9004	9.05073	14.979	18.5128	15.4002	20.4789	14.2248	365.003	319.543	637.455	579.321	386.418	51.7247	49.5817	16.1458	16.0172	---	---
1446643_at	7.64948	8.75959	7.70162	9.58919	8.45187	78.3938	10.5381	25.6646	228.533	20.4797	237.212	839.631	4478.69	1303.95	1231.9	2630.97	166.494	220.898	72.6374	25.7439	5330409N07Rik	319766
1454139_at	9.40986	25.6269	3.67213	8.94196	6.02085	49.6128	7.93759	44.1245	348.747	77.1791	550.253	2348.93	10689.8	3254.36	2863.66	4839.22	260.606	298.262	229.9	86.1651	4930405N21Rik	73797
1441488_at	6.04559	7.36681	7.30163	6.81141	7.50994	7.12386	7.19366	7.35392	7.93843	7.41681	7.62925	125.991	129.666	334.519	283.388	195.71	47.5306	56.674	40.4657	7.51715	---	---
1433198_at	8.93425	9.85129	6.45591	15.8968	8.12553	79.4979	5.52716	44.9783	436.169	32.9916	239.111	758.272	5628.53	1089.94	855.587	1754.74	53.1211	63.8936	53.9523	15.4524	4930445B03Rik	74867
1443290_at	8.53841	11.8796	10.1318	11.8209	11.9712	7.55505	11.6396	11.8454	15.6327	11.5241	12.0544	301.152	243.289	598.658	389.354	207.843	43.7589	62.701	58.8827	13.4796	---	---
1459282_at	4.21441	4.0511	4.18667	3.91604	4.27478	6.50474	4.08447	4.21315	7.34815	4.01976	21.422	69.5149	224.792	281.533	190.458	258.564	5.1974	27.1783	4.4177	4.68301	---	---
1447368_at	5.30675	13.2515	4.89269	5.24907	12.5095	5.7209	4.83006	5.44672	5.07508	14.4064	13.6631	112.646	74.5528	235.379	321.601	293.361	117.811	147.466	91.7283	70.0335	6430706D22Rik /// LOC100040766	100040766 /// 381280
1436630_at	8.05679	7.02582	6.9992	7.74957	6.34951	6.50964	6.92175	7.02586	9.01519	17.0098	10.8176	62.2352	61.8055	265.387	346.552	256.676	178.937	167.792	149.757	76.2678	---	---
1433182_at	4.21148	5.42212	5.37797	3.98248	4.15118	4.9109	4.07789	4.39093	7.6979	8.30434	5.5584	133.151	76.3209	287.381	268.464	169.124	60.4958	139.818	117.06	110.773	4930431N21Rik	74623
1459661_at	7.39584	7.85316	6.3359	6.62604	7.70995	5.88931	7.30518	8.93676	8.75065	6.64083	9.83694	158.824	135.904	500.519	260.921	172.81	32.4021	33.3076	18.6896	15.3721	Dcdc2a	195208
1432694_at	7.60628	7.98214	12.1391	11.5337	9.90425	12.3649	13.401	15.2242	96.3695	12.5821	57.7944	320.113	1747.26	782.185	326.028	547.656	21.5279	20.5005	19.6183	27.1392	4921527H02Rik	70929
1423691_x_at	7.47524	6.15239	8.20704	6.64489	6.9649	6.02111	7.16333	7.43713	6.90557	8.64413	9.01786	55.9963	35.4342	111.385	201.483	218.011	284.182	386.398	203.839	137.79	Krt8	16691
1432642_at	11.9417	12.076	11.8047	10.4333	12.2188	11.1108	11.5188	12.6503	53.1245	11.2416	18.977	82.9394	587.622	256.755	358.667	670.304	46.5977	27.8319	92.4421	46.5002	4933411E06Rik	71181
1428571_at	7.79122	7.80969	7.72187	8.9465	8.08577	7.26343	5.32103	7.95991	7.74519	11.9719	8.34388	79.2826	42.3498	201.423	243.659	185.341	136.256	136.026	170.08	105.819	Col9a1	12839
1421613_at	7.04248	15.1891	6.57364	33.4184	6.96786	9.6913	6.44779	44.8573	64.3463	83.1887	76.8409	421.508	661.106	1260.12	1552.19	1697.65	444.348	313.781	379.143	240.186	H2afy3	67552
1434918_at	4.89524	6.71325	6.65747	6.60169	7.17363	10.1774	7.41122	7.18688	11.8681	12.7077	13.9011	179.195	154.055	402.896	384.402	185.763	43.7147	121.675	110.575	37.8982	Sox6	20679
1424341_s_at	3.30743	4.08862	3.32384	5.04931	3.32396	3.80388	3.87372	3.57847	10.9549	67.8409	21.9756	24.1706	289.632	159.65	239.184	877.411	218.47	435.201	516.991	454.939	Pcdha1 /// Pcdha10 /// Pcdha11 /// Pcdha12 /// Pcdha2 /// Pcdha3 /// Pcdha4 /// Pcdha5 /// Pcdha6 /// Pcdha7 /// Pcdha8 /// Pcdha9 /// Pcdhac1 /// Pcdhac2	116731 /// 12936 /// 12937 /// 12939 /// 12941 /// 12942 /// 12943 /// 192161 /// 192163 /// 192164 /// 353234 /// 353235 /// 353236 /// 353237
1429096_at	9.36341	10.7481	11.1369	9.95922	10.9895	10.3818	10.3868	10.7205	17.0759	22.6313	11.976	115.448	130.093	439.733	434.305	351.991	143.082	252.394	259.951	269.896	2810455D13Rik	72810
1445813_at	7.20786	9.75795	9.66884	8.64563	7.13159	9.44658	5.77879	9.74314	19.2039	14.8522	11.4226	98.3384	238.798	212.508	265.856	420.276	224.197	327.473	388.462	255.232	Wdr27	71682
1433466_at	9.31167	9.67241	9.01392	15.7122	9.03136	8.61415	9.15167	11.2996	16.8103	19.7771	21.043	102.727	300.147	270.296	290.734	526.516	29.4617	41.9011	20.6572	20.1051	AI467606	101602
1438873_at	34.5129	19.5325	16.7261	28.1339	29.8229	53.9823	24.8981	104.861	185.188	136.351	196.101	957.16	5424.47	2237.95	1987.96	6950.57	324.936	325.381	445.855	215.75	Zfp389	100038371
1459725_s_at	10.2717	12.376	11.6531	11.3278	10.7517	10.3132	12.1288	10.3956	11.0041	14.9925	15.9507	26.0875	16.4977	162.467	284.74	317.078	168.837	134.37	81.0797	72.4884	Dcpp1 /// Dcpp2 /// Dcpp3 /// LOC100046800	100046800 /// 13184 /// 620253 /// 630537
1423843_at	18.0561	17.9535	17.7791	18.3382	16.6528	15.2408	15.0611	22.6501	17.7715	16.5529	22.5769	209.19	190.959	647.981	631.587	291.481	54.3346	92.8682	37.4567	44.4114	Lrrc61	243371
1419239_at	7.61502	7.68776	7.62935	7.17531	7.73959	7.04126	7.34134	8.5554	7.48832	15.8978	13.6279	117.307	45.544	307.176	345.079	220.854	191.278	204.44	197.06	202.042	Zfp54	22712
1443960_at	8.1935	8.8429	9.12183	11.1678	8.3506	9.43497	8.4842	17.1071	16.2477	13.3911	19.5032	407.298	194.806	701.074	529.206	220.656	36.8104	73.9898	20.8374	42.5238	---	---
1456202_at	9.35854	9.89305	8.36261	8.65302	9.55571	20.0348	9.04176	31.3012	107.552	25.2149	95.7593	440.018	2779.72	859.536	611.044	1381.87	81.6304	97.1891	68.3856	11.5129	Elfn2	207393
1427749_at	10.3238	6.27337	6.22908	9.72066	6.32112	9.915	10.7835	11.3871	11.5407	17.9371	18.1461	39.1985	228.553	119.325	188.879	581.169	320.325	277.763	307.141	215.525	Galnt3	14425
1436470_at	5.50667	5.48576	5.39565	5.04515	5.58925	5.31963	5.29276	9.5499	8.98774	6.58065	6.08269	243.431	173.016	378.377	225.466	145.612	20.2917	28.4711	13.833	7.9797	Rims2	116838
1429472_at	4.66274	9.35001	5.25624	4.92031	6.1007	8.91707	4.54107	26.9596	166.908	15.0584	100.854	795.856	4880.7	1197.87	1090.56	3686.83	130.962	169.539	215.288	121.167	4921525O09Rik	74050
1433306_at	7.61356	15.8239	5.46416	7.64695	7.8294	4.93356	6.96765	15.7444	14.7465	45.5748	49.3292	493.915	358.799	1201.34	939.482	761.913	266.147	274.071	284.816	124.578	4930456K20Rik	74898
1421943_at	7.57134	12.7578	14.2105	22.1502	12.3161	15.6505	14.6898	14.2865	16.8157	32.5337	24.3033	90.871	160.075	233.524	405.257	621.448	55.7587	116.343	86.4364	85.5256	Tgfa	21802
1427770_a_at	5.86428	6.01498	5.79712	5.42722	6.01793	5.62819	5.78567	5.98454	5.50535	5.6304	6.31257	10.1409	52.9258	81.057	81.5936	381.86	6.66484	34.808	145.02	7.41371	Slc2a3	20527
1432473_a_at	9.60091	7.91641	9.49254	16.5786	10.2134	10.3891	11.4109	9.95084	36.1494	161.961	41.4317	244.481	1104.11	778.968	1010.47	3183.98	176.874	838.74	1319.78	702.916	Abca14	67928
1420798_s_at	6.13748	12.682	5.8703	6.1091	6.04677	7.39169	6.92396	9.15149	16.3298	64.4378	31.4871	96.0994	333.73	410.73	602.717	1120.15	378.426	372.776	467.504	482.331	Pcdha1 /// Pcdha10 /// Pcdha11 /// Pcdha12 /// Pcdha2 /// Pcdha3 /// Pcdha4 /// Pcdha5 /// Pcdha6 /// Pcdha7 /// Pcdha8 /// Pcdha9 /// Pcdhac1 /// Pcdhac2	116731 /// 12936 /// 12937 /// 12939 /// 12941 /// 12942 /// 12943 /// 192161 /// 192163 /// 192164 /// 353234 /// 353235 /// 353236 /// 353237
1445425_at	6.90394	9.77847	6.75455	6.48288	6.91801	6.45143	6.54373	9.36241	6.30998	8.04743	7.45176	23.2466	19.8691	154.132	161.066	181.023	90.2426	55.1541	51.8615	52.4154	LOC432958	432958

## Sheet: Round Spermatids
#8-RoundSpermatidsTop50
Probeset ID	Spermatogonia-PRJB02	Spermatogonia-PRJB05	Spermatogonia-PRJ07	Spermatogonia-PRJB08	pre-Leptotene-PRJB02	pre-Leptotene-PRJB05	pre-Leptotene-PRJB08	Leptotene/Zygotene-PRJB02	Leptotene/Zygotene-PRJB06	Leptotene/Zygotene-PRJB08	early-Pachytene-PRJB05	mid-Pachytene-PRJB04	mid-Pachytene-PRJB06	late-Pachytene-PRJB02	Diplotene-PRJB04	Diplotene-PRJB06	Round Spermatids-PRJB04	Round Spermatids-PRJB05	Round Spermatids-PRJB06	Round Spermatids-PRJB08	GeneSymbolAffy	EntrezIDAffy
1453713_s_at	4.53353	7.63426	5.38055	4.63591	5.79855	5.68112	5.59772	5.65531	6.54466	11.2657	171.753	36.1807	176.159	16.2805	54.2405	286.709	521.285	1597.63	1659.13	436.166	4930546H06Rik	75202
1437435_at	16.5672	19.9195	15.4758	18.6595	13.5046	19.0847	13.5483	19.4613	15.5419	57.5231	155.917	35.7852	207.358	21.0288	180.125	213.497	1708.91	1532.59	1546.17	1176.89	1700061G19Rik	78625
1432871_at	5.22189	8.75168	5.15705	5.05026	5.51281	5.59659	5.59493	6.65608	10.2179	9.76816	12.0551	70.0345	67.4305	12.4548	42.2381	93.9304	520.728	709.813	647.103	456.317	4932429P19Rik	74389
1439821_at	8.15004	8.08916	8.03491	7.93703	7.69199	7.39339	7.99351	7.67813	7.2231	11.7858	10.1918	11.5925	27.5291	54.7223	80.4014	36.0681	419.707	634.115	468.611	650.101	Lrp2bp	67620
1453292_at	6.75349	11.4026	6.30619	8.36166	8.48818	5.65614	5.92347	10.6422	8.2075	18.3766	37.6599	16.959	90.4089	11.6395	55.524	113.58	646.564	769.794	839.461	468.963	4921501E09Rik	74042
1421614_at	4.46132	4.47457	4.42858	4.09861	4.57555	5.16299	4.32758	5.32653	4.17182	4.2886	75.7127	19.6094	48.8088	13.8035	41.9141	88.9854	412.975	584.964	466.341	334.523	Zan	22635
1431447_at	21.7742	55.4361	26.672	20.1726	15.7539	35.089	15.4598	28.3794	36.0671	53.8182	389.463	117.194	402.523	58.2483	195.672	837.495	2159.92	3944.64	3442.51	1024.49	4930432K09Rik	73779
1431979_at	7.43384	6.71741	7.30638	6.88339	7.58442	7.36201	8.92183	7.38779	8.68652	14.4549	78.6334	54.9802	73.4501	12.2583	34.6308	155.108	385.348	648.456	725.099	497.667	4930444M15Rik	75789
1454432_at	6.22002	8.19581	6.10098	5.83139	6.37643	6.14688	5.98614	6.71802	6.36175	19.0065	19.1489	6.35261	37.6369	13.9429	64.9797	55.3721	508.805	430.353	567.299	322.034	4933423N03Rik	71170
1429721_s_at	8.67428	18.615	14.3489	10.1085	7.33585	9.70432	6.98917	11.8897	12.0014	21.6397	290.88	66.8659	189.824	35.6553	132.221	322.793	944.703	1739.68	1684.24	496.825	4930579C15Rik	67753
1432550_at	27.0129	77.1566	27.6453	33.8895	17.2986	54.5977	11.998	56.082	46.831	60.0568	1072.35	123.251	635.229	109.347	344.356	756.513	4466.81	5356.43	4414.48	1381.86	Tmem190	78052
1430968_at	5.2613	12.8752	4.73618	6.60758	4.80831	8.55036	4.46589	9.0654	6.48735	10.2929	75.8955	31.4693	52.6292	11.6477	55.2038	109.872	602.254	481.592	587.554	253.849	4930517O19Rik	75075
1440128_s_at	5.78385	6.17583	5.02616	4.91578	5.73906	5.41732	4.92205	5.69998	5.14576	9.92303	26.1465	27.0229	32.8222	9.08872	35.4811	78.4847	408.847	429.083	536.417	192.582	Sez6l	56747
1430199_at	11.9273	15.1497	11.7648	25.2834	9.32532	15.4416	17.4874	11.9509	24.9566	34.5315	79.3607	25.787	197.29	30.9769	39.9529	253.411	382.906	1374.74	1541.3	1435.63	1700007E05Rik	114672
1422726_x_at	9.10483	13.479	9.52763	20.2487	9.34369	9.38755	9.11126	13.4398	19.0794	44.1285	103.176	23.0122	180.384	26.2818	28.8777	398.488	340.594	997.087	1691.48	1152.17	Speer4a	75657
1449832_at	4.41734	5.22198	5.18025	22.7098	5.27949	6.37615	7.51033	5.16981	30.9768	64.3781	140.566	25.0345	326.655	18.2544	31.1822	429.054	278.298	1023.28	2196.66	1693.9	1700091H14Rik	73553
1428030_at	10.6415	23.4051	9.11591	8.88122	10.5262	14.9416	8.4744	11.3816	11.5757	11.5896	120.463	24.3652	88.6724	20.9919	60.6181	128.775	963.388	936.61	731.336	589.534	Adam34	252866
1454081_at	6.02281	6.01577	6.68842	7.97865	5.50449	6.12889	5.95046	6.88897	6.16449	9.10014	10.9329	24.5745	19.1714	12.1308	26.0732	72.5325	329.12	316.601	445.511	332.005	---	---
1454210_at	8.49509	13.7977	8.99696	8.67241	8.63794	8.2391	8.19503	9.3399	7.82801	17.2427	13.0429	12.275	41.7325	21.4379	75.9384	74.078	436.545	412.393	607.958	412.02	4933428M09Rik	71248
1454033_at	8.08398	55.8877	23.876	28.1694	7.93001	34.2242	10.4596	20.1397	34.3593	81.4727	340.107	58.8068	351.385	43.0881	177.922	580.528	1537.04	3120.92	2671.25	1126.88	Pdilt	71830
1432433_at	5.72269	7.4996	4.95094	9.41402	5.12639	5.98357	5.98308	7.87224	8.69452	9.77743	69.9055	26.4154	81.6487	27.6962	81.9787	141.559	449.741	879.346	989.508	313.884	4930524N10Rik	75071
1432477_at	13.3039	15.4759	11.6634	9.83153	10.0388	13.0371	10.7179	15.2933	15.7702	15.0103	111.577	25.3422	99.3088	10.1651	53.188	159.269	434.852	727.54	1133.76	181.901	4930412D23Rik	73934
1432326_at	7.41465	11.2607	15.6386	8.93189	6.57348	11.9376	6.23578	8.85117	42.342	22.8122	167.719	15.2736	163.747	12.1154	57.8542	226.306	288.713	996.471	1174.87	378.65	1700042B14Rik	73347
1431902_at	11.4029	13.0884	10.0312	11.3551	11.147	12.4014	10.465	16.0067	8.87494	20.6429	15.1326	46.567	25.1482	23.9118	87.4434	57.0669	880.945	488.959	467.677	511.274	Ttc23l	75777
1446251_at	5.63309	7.54194	5.58491	5.34763	5.41282	5.48232	5.4578	6.15512	6.95535	10.2848	19.7126	24.4352	30.1679	8.47345	29.0398	74.6514	412.57	411.508	374.748	134.912	4930565A17	327760
1454274_at	57.0069	170.825	27.3099	27.3432	5.4937	27.9131	10.2903	57.4747	34.2004	53.5139	575.579	103.123	370.954	58.6449	283.02	410.535	3911.17	3721.87	3201.31	747.916	Tmem210	78217
1454192_at	12.9368	30.4314	24.3723	13.4997	6.31992	31.0209	7.1485	18.0827	25.955	32.0028	257.201	39.5317	199.802	34.8483	121.426	332.463	880.993	1599.77	1385.59	479.714	4930579C15Rik	67753
1436129_at	11.8344	24.595	12.6406	8.67582	12.2064	11.1892	10.6734	11.1344	10.4205	10.9892	34.916	10.9912	37.7796	11.5181	12.5551	85.2487	354.397	471.622	385.086	271.106	Adam6a /// Adam6b	238405 /// 238406
1429790_at	5.23636	5.58912	5.50573	7.11611	5.40432	8.83961	6.19715	6.74595	6.2596	7.43199	15.6921	25.7536	34.0606	8.45303	25.2165	58.3938	247.836	371.762	332.532	241.253	Brunol6	76183
1451008_at	9.91011	13.9446	11.7935	8.03239	6.87761	8.99339	4.02293	10.6862	9.38141	11.2517	23.9649	26.4421	16.484	11.4515	62.456	21.8771	627.475	394.585	381.371	210.953	St8sia3	20451
1432095_at	7.89925	8.43157	6.77717	8.3034	8.35173	9.52657	5.90159	8.13243	6.99841	19.1834	31.1555	10.6587	34.2249	8.38146	38.8959	78.4507	591.963	430.458	387.71	75.7764	4921534H16Rik	66737
1432146_at	42.2565	123.556	41.7518	38.7257	15.2132	48.6362	38.5735	54.6044	63.5838	83.5955	705.354	152.328	620.987	74.4522	249.185	811.54	3104.64	4787.32	4270.83	1290.59	Catsper3	76856
1420787_at	7.84696	12.7744	9.53387	8.36353	7.89769	7.23514	7.25953	13.2984	8.42074	12.6228	16.5786	13.284	35.4295	8.72333	38.3587	73.9255	665.939	363.628	375.867	224.404	4933436I01Rik	66780
1430905_at	6.29657	12.6498	5.64064	15.8941	4.93727	11.7737	8.20174	10.76	9.06749	45.1938	118.883	88.2343	116.191	55.1673	164.727	218.12	1609.58	1363.39	1372.77	1487.07	4921504E06Rik	70909
1431639_at	3.99763	4.57412	3.92122	3.81471	3.99445	4.4075	3.82231	3.96562	3.83255	6.71694	27.9928	4.06193	52.4533	9.02129	23.0349	80.1411	157.417	396.615	670.746	168.159	4930468A15Rik	74987
1432040_at	4.89354	4.88618	4.9715	4.82437	5.08454	4.90175	4.73135	4.86384	4.84867	4.97237	26.6065	5.10804	30.5089	5.72998	7.741	65.3984	171.172	285.651	514.91	273.526	4933417O13Rik	71153
1432335_at	6.38058	10.6873	5.80521	9.38619	5.51692	9.53472	5.65595	7.17274	9.01316	10.7135	11.7994	10.9179	15.5762	10.9456	42.9902	45.7088	608.639	213.127	267.583	269.271	4930551O13Rik	75263
1417852_x_at	7.56817	7.38932	7.27956	9.46111	7.25685	7.07174	6.91804	7.65303	7.30708	10.4246	9.2752	17.887	43.3441	42.9241	67.2062	127.619	223.195	380.998	414.707	181.68	Clca1	12722
1452018_at	8.30087	10.5564	8.78009	8.68547	7.74693	7.61033	8.92751	7.90522	7.04198	11.3837	9.31939	9.04899	29.8366	12.5457	17.8455	21.2673	346.568	467.785	456.827	83.3697	Nkx2-6	18092
1431448_at	9.09911	11.2986	6.77743	6.08154	6.48453	6.12879	6.07345	6.85151	6.77506	11.0862	32.9887	17.0759	58.0094	11.5947	67.8205	65.3047	439.511	403.543	381.27	155.146	4930474N09Rik	67639
1419151_at	18.1346	44.9194	17.83	125.362	11.5697	38.8071	43.7733	42.7546	127.762	396.832	1612.3	268.216	2100.48	188.518	318.421	3075.22	1911.51	7219.68	13979.6	8368.92	100041548 /// 4930449I24Rik /// 622924	100041548 /// 622924 /// 67410
1418546_a_at	21.8938	59.8808	25.44	31.561	18.3063	36.1748	19.3905	35.4071	27.1261	54.2412	389.499	44.1643	249.502	38.1053	120.658	260.99	1438.61	1465.12	1815.7	894.284	Stambpl1	76630
1435596_at	8.61365	7.39682	8.50411	8.24517	8.6704	8.36976	8.35878	8.5288	8.21133	8.2598	13.8856	8.51131	12.586	17.472	19.7888	39.6843	143.616	410.072	488.812	201.947	Pion	212167
1442101_at	3.99679	4.87491	3.9935	5.77732	4.16339	3.8953	4.01954	10.0484	6.68687	42.5993	46.4737	19.0932	50.7275	22.2515	147.479	231.012	576.365	517.526	612.708	549.941	Elfn1	243312
1421676_at	7.12361	7.52303	7.26345	6.76094	7.51674	6.96343	7.04666	7.1599	6.52235	6.92351	14.8881	7.77621	9.75846	9.65735	25.1518	70.3479	347.251	428.852	425.467	86.7882	4930542N07Rik	75185
1431441_at	4.17149	4.22016	4.11954	3.92822	4.2724	4.13435	4.04149	4.27168	3.9243	3.99774	61.2723	4.2601	10.8729	4.42564	9.95781	44.7004	261.542	416.923	446.598	112.195	1700106J16Rik	74297
1427690_a_at	7.8345	10.346	10.2106	11.9583	9.97933	11.8877	10.8895	10.7297	11.2417	16.8877	22.9279	29.8531	46.334	18.6895	56.2118	99.9719	475.803	487.116	619.071	379.719	Tpte	234129
1431509_at	9.33806	7.73545	9.2941	6.47336	7.14027	11.7935	7.19157	19.2768	8.59253	14.6968	43.9686	35.6831	60.4231	10.6672	61.6192	110.866	748.315	477.115	647.103	193.571	4933404G15Rik	74066
1453390_at	4.32043	4.93255	4.26184	4.57767	4.39084	4.25495	4.26904	4.29297	4.22159	11.819	27.3114	5.13836	18.0168	11.2058	64.1937	236.004	185.329	198.726	427.051	336.722	4930428F12Rik	74632
1427957_at	3.94801	7.0769	5.08206	6.16933	4.65709	10.1579	4.75186	5.71262	6.14836	13.88	47.2535	14.151	47.6262	11.9081	42.7895	77.0652	386.996	449.416	497.695	149.307	9530008L14Rik	109254

## Sheet: Centrins Tektins
Gene Symbol	Spermatogonia	pre-Leptotene	Leptotene/Zygotene	early-Pachytene	mid-Pachytene	late-Pachytene	Diplotene	Round Spermatids	Probe Set ID	Entrez Gene ID
Cetn1	645.598	144.905	1881.48	5183.18	8292	13094.1	16618.5	15090.2	1423203_a_at	26369
Cetn1	116.114	33.3604	208.658	792.407	862.512	1850	2001.2	2414.82	1453881_x_at	26369
Cetn2	2802.87	3029.99	3085.16	1509.85	782.089	166.953	74.1856	155.264	1438647_x_at	26370
Cetn2	896.553	813.349	850.949	428.479	227.497	13.8333	9.11258	50.8369	1418579_at	26370
Cetn3	3745.63	3115.73	4574.01	3322.03	4452.25	6699.44	7777.34	7942.31	1417239_at	12626
Cetn4	21.5293	22.0765	20.9355	46.0738	143.394	351.154	418.163	300.089	1445511_at	207175
Cetn4	1306.9	468.705	2293.89	7498.97	7744.21	11422.2	13971.9	15216.4	1436617_at	207175
Tekt1	220.552	107.655	594.828	2344.72	2140.8	2699.57	4421.41	7412.54	1432075_a_at	21689
Tekt2	209.242	139.314	355.819	1970.01	1172.39	1395.87	2262.6	5790.29	1418484_at	24084
Tekt3	93.4214	36.9562	253.894	1224.47	683.035	1359.5	2640.85	5035.42	1429143_at	71062
Tekt4	94.6752	41.7076	212.416	1788.37	574.261	440.283	1483.64	5464.39	1453121_at	71840
Tekt5	52.5551	12.2126	49.5861	244.197	273.308	622.798	891.675	887.325	1429355_at	70426
