# Supplementary material for: A Global Expression Switch Marks Pachytene Initiation during Mouse Male Meiosis
Source: Genes (Basel). 2010 Dec 13;1(3):469–83. doi: 10.3390/genes1030469 (PMC3966219; doi:10.3390/genes1030469)
Supplement: Supplementary File 8 — Supplementary Table S1 (XLS, 36 KB) [file genes-01-00469-s008.xls]

## Sheet: Sheet1
Sample Name	Array Name	Sertoli cell rep1 (MP)	Sertoli cell rep2 (MP)	spermatogonium rep1 (MP)	spermatogonium rep2 (MP)	Type A spermatogonia rep1 (JL)	Type A spermatogonia rep2 (JL)	Type B spermatogonia rep3 (JL)	Type B spermatogonia rep4 (JL)	Spermatogonia rep1 (PB)	Spermatogonia rep2 (PB)	Spermatogonia rep3 (PB)	Spermatogonia rep4 (PB)	pre-Leptotene rep1 (PB)	pre-Leptotene rep2 (PB)	pre-Leptotene rep3 (PB)	Leptotene-Zygotene rep1 (PB)	Leptotene-Zygotene rep2 (PB)	Leptotene-Zygotene rep3 (PB)	early-Pachytene rep1 (PB)	mid-Pachytene rep1 (PB)	mid-Pachytene rep2 (PB)	late-Pachytene rep1 (PB)	Diplotene rep1 (PB)	Diplotene rep2 (PB)	Pachytene spermatocytes rep1 (JL)	Pachytene spermatocytes rep2 (JL)	spermatocyte rep1 (MP)	spermatocyte rep2 (MP)	Round Spermatids rep1 (PB)	Round Spermatids rep2 (PB)	Round Spermatids rep3 (PB)	Round Spermatids rep4 (PB)	Round spermatids rep1 (JL)	Round spermatids rep2 (JL)	spermatid rep1 (MP)	spermatid rep2 (MP)	seminiferous tubule rep1 (MP)	seminiferous tubule rep2 (MP)	total testis rep1 (MP)	total testis rep2 (MP)
		MSE1_MOE430_2_philippe_demougin_011204.CEL	MSE2_MOE430_2_philippe_demougin_011204.CEL	MSG1_MOE430_2_philippe_demougin_011204.CEL	MSG2_MOE430_2_philippe_demougin_011204.CEL	GSM95928.CEL	GSM95929.CEL	GSM95930.CEL	GSM95947.CEL	P3.CEL	PRJB00002_P3.CEL	PRJB00005_P3.CEL	PRJB00007_SP1.CEL	P4.CEL	PRJB00002_P4.CEL	PRJB00005_P4.CEL	P5.CEL	PRJB00002_P5.CEL	PRJB00006_P5.CEL	PRJB00005_P5.CEL	PRJB00004_P7.CEL	PRJB00006_P6.CEL	PRJB00002_P6.CEL	PRJB00004_P8.CEL	PRJB00006_P10.CEL	GSM95948.CEL	GSM95949.CEL	MSC1_MOE430_2_philippe_demougin_011204.CEL	MSC2_MOE430_2_philippe_demougin_011204.CEL	P9.CEL	PRJB00004_P9.CEL	PRJB00005_P9.CEL	PRJB00006_P12.CEL	GSM95950.CEL	GSM95951.CEL	MST1_MOE430_2_philippe_demougin_011204.CEL	MST2_MOE430_2_philippe_demougin_011204.CEL	MTU1_MOE430_2_philippe_demougin_011204.CEL	MTU2_MOE430_2_philippe_demougin_011204.CEL	MTT1_MOE430_2_philippe_demougin_011204.CEL	MTT2_MOE430_2_philippe_demougin_011204.CEL
Sertoli cell rep1 (MP)	MSE1_MOE430_2_philippe_demougin_011204.CEL	1	0.978601	0.866609	0.879003	0.756055	0.754852	0.729887	0.755686	0.672105	0.639108	0.606055	0.653873	0.652337	0.652696	0.644304	0.64951	0.65619	0.657428	0.592978	0.596991	0.514819	0.479419	0.456098	0.375449	0.404098	0.436865	0.455165	0.454084	0.350326	0.418649	0.381583	0.353651	0.333676	0.362089	0.352726	0.354459	0.478143	0.487757	0.449655	0.462803
Sertoli cell rep2 (MP)	MSE2_MOE430_2_philippe_demougin_011204.CEL		1	0.901228	0.911567	0.789678	0.793379	0.774484	0.80138	0.726871	0.694426	0.653236	0.709561	0.709148	0.707933	0.69308	0.703405	0.709499	0.710418	0.632058	0.640725	0.548209	0.520906	0.490662	0.402226	0.434254	0.467809	0.484064	0.483254	0.376174	0.448013	0.40859	0.381917	0.362937	0.394052	0.374159	0.376261	0.497166	0.507378	0.468461	0.482034
spermatogonium rep1 (MP)	MSG1_MOE430_2_philippe_demougin_011204.CEL			1	0.994765	0.858994	0.855807	0.854823	0.885209	0.861692	0.814738	0.764722	0.835657	0.841469	0.835081	0.818431	0.829386	0.833303	0.836791	0.732342	0.743591	0.629019	0.592354	0.552031	0.445526	0.463151	0.496857	0.533734	0.531451	0.417006	0.500995	0.454397	0.425256	0.393061	0.430324	0.40851	0.410903	0.536423	0.547769	0.508149	0.521235
spermatogonium rep2 (MP)	MSG2_MOE430_2_philippe_demougin_011204.CEL				1	0.855364	0.854197	0.851421	0.882393	0.838033	0.79748	0.746618	0.816598	0.819205	0.816358	0.797316	0.806536	0.814747	0.815046	0.714202	0.726909	0.613405	0.579842	0.54007	0.434354	0.45664	0.488987	0.523517	0.521834	0.404925	0.489212	0.441465	0.412334	0.385036	0.421328	0.399424	0.401662	0.528021	0.539611	0.498014	0.511425
Type A spermatogonia rep1 (JL)	GSM95928.CEL					1	0.96316	0.95899	0.917902	0.868928	0.836319	0.776822	0.851985	0.868318	0.86771	0.838676	0.847426	0.860786	0.864322	0.735018	0.754483	0.653893	0.61664	0.570269	0.472573	0.561011	0.573285	0.480654	0.484296	0.456498	0.528094	0.478448	0.442454	0.470401	0.487797	0.3633	0.364254	0.470651	0.481753	0.440138	0.455247
Type A spermatogonia rep2 (JL)	GSM95929.CEL						1	0.983487	0.919215	0.846903	0.80519	0.743348	0.832784	0.846933	0.83344	0.801266	0.826812	0.827075	0.836788	0.693913	0.723568	0.626678	0.593192	0.548838	0.457978	0.565045	0.579322	0.473208	0.476587	0.435199	0.500227	0.455762	0.427198	0.47533	0.486895	0.355182	0.356455	0.455246	0.466717	0.425025	0.441296
Type B spermatogonia rep3 (JL)	GSM95930.CEL							1	0.932959	0.871468	0.841875	0.776353	0.870922	0.876655	0.86676	0.83335	0.854288	0.858959	0.866986	0.724696	0.752989	0.651675	0.624169	0.576899	0.480512	0.583387	0.597484	0.495402	0.498636	0.455213	0.526358	0.479259	0.448617	0.496976	0.51136	0.372147	0.373735	0.47074	0.482667	0.439096	0.455717
Type B spermatogonia rep4 (JL)	GSM95947.CEL								1	0.880772	0.867924	0.811147	0.868001	0.867224	0.874313	0.840224	0.880749	0.882964	0.871992	0.798945	0.835969	0.725656	0.738286	0.694062	0.587267	0.64098	0.674616	0.614138	0.61719	0.560122	0.63857	0.592305	0.563878	0.556793	0.588116	0.474726	0.479438	0.578082	0.589532	0.54392	0.560677
Spermatogonia rep1 (PB)	P3.CEL									1	0.949882	0.907438	0.974345	0.987973	0.966672	0.95533	0.976982	0.967844	0.977075	0.861735	0.874298	0.764315	0.711408	0.669745	0.565883	0.555204	0.579018	0.566219	0.565317	0.550545	0.626429	0.577477	0.542129	0.502572	0.535927	0.455902	0.457966	0.559442	0.569249	0.536722	0.549331
Spermatogonia rep2 (PB)	PRJB00002_P3.CEL										1	0.960027	0.965671	0.944132	0.972989	0.943266	0.932925	0.972665	0.94024	0.869142	0.875452	0.738619	0.721118	0.679586	0.552366	0.539223	0.565844	0.562586	0.563847	0.553899	0.682229	0.60106	0.555721	0.538109	0.583401	0.524332	0.522483	0.622956	0.629845	0.598714	0.608968
Spermatogonia rep3 (PB)	PRJB00005_P3.CEL											1	0.930623	0.89459	0.909415	0.935069	0.902216	0.921205	0.899354	0.904615	0.870479	0.767857	0.726725	0.699611	0.60178	0.553012	0.577174	0.603846	0.603332	0.624066	0.72996	0.670686	0.617389	0.589609	0.638571	0.62009	0.615234	0.711163	0.714976	0.695452	0.702262
Spermatogonia rep4 (PB)	PRJB00007_SP1.CEL												1	0.979649	0.97065	0.9638	0.960726	0.965601	0.969879	0.865624	0.8644	0.75247	0.702974	0.661337	0.55599	0.549296	0.570329	0.55559	0.555087	0.538603	0.629472	0.57423	0.535149	0.509075	0.542213	0.461594	0.462777	0.563131	0.573082	0.538801	0.551456
pre-Leptotene rep1 (PB)	P4.CEL													1	0.971619	0.96048	0.974511	0.967943	0.980494	0.851827	0.859242	0.751346	0.696209	0.651377	0.548539	0.552305	0.570677	0.543224	0.542734	0.52914	0.601501	0.553739	0.516755	0.487547	0.514742	0.421218	0.423581	0.522728	0.533712	0.49834	0.511502
pre-Leptotene rep2 (PB)	PRJB00002_P4.CEL														1	0.964754	0.950552	0.99232	0.962599	0.869955	0.870572	0.731351	0.705018	0.655762	0.529906	0.530259	0.551012	0.523731	0.524112	0.514666	0.624547	0.557589	0.507357	0.475362	0.506154	0.414318	0.416082	0.515597	0.525908	0.489494	0.502163
pre-Leptotene rep3 (PB)	PRJB00005_P4.CEL															1	0.947371	0.967485	0.962682	0.918418	0.877755	0.776757	0.715193	0.673394	0.577422	0.540641	0.55889	0.549802	0.548176	0.563607	0.643584	0.603713	0.546676	0.48627	0.516308	0.442364	0.444578	0.545745	0.555253	0.52545	0.535996
Leptotene-Zygotene rep1 (PB)	P5.CEL																1	0.96368	0.977333	0.906169	0.925929	0.839461	0.799871	0.768554	0.682242	0.657801	0.681256	0.66948	0.668808	0.661553	0.717321	0.684745	0.654214	0.592443	0.620789	0.532384	0.53768	0.625909	0.636941	0.602331	0.616446
Leptotene-Zygotene rep2 (PB)	PRJB00002_P5.CEL																	1	0.968032	0.902479	0.9056	0.774134	0.747487	0.70196	0.579894	0.565425	0.588225	0.566157	0.566402	0.562531	0.668402	0.605534	0.554347	0.509515	0.542798	0.453606	0.456264	0.556971	0.567156	0.530717	0.543104
Leptotene-Zygotene rep3 (PB)	PRJB00006_P5.CEL																		1	0.885923	0.896509	0.818474	0.748394	0.707239	0.620239	0.59955	0.619366	0.596001	0.595638	0.584404	0.651396	0.61334	0.579729	0.525335	0.553161	0.462681	0.466271	0.567236	0.578473	0.542793	0.556145
early-Pachytene rep1 (PB)	PRJB00005_P5.CEL																			1	0.939932	0.879926	0.854657	0.836344	0.770465	0.672566	0.6978	0.724414	0.721776	0.764479	0.818307	0.810665	0.750252	0.626052	0.65939	0.607824	0.614707	0.691385	0.699074	0.674097	0.68375
mid-Pachytene rep1 (PB)	PRJB00004_P7.CEL																				1	0.932613	0.93309	0.915971	0.827785	0.760596	0.782643	0.792448	0.790998	0.784754	0.851635	0.820546	0.784445	0.667489	0.698646	0.633087	0.640681	0.725774	0.733772	0.705499	0.717175
mid-Pachytene rep2 (PB)	PRJB00006_P6.CEL																					1	0.90689	0.906536	0.911957	0.792623	0.804452	0.820429	0.81845	0.8387	0.829992	0.851235	0.836001	0.687231	0.705793	0.649575	0.659002	0.726063	0.733848	0.712422	0.722808
late-Pachytene rep1 (PB)	PRJB00002_P6.CEL																						1	0.987216	0.926864	0.872284	0.89304	0.896118	0.896326	0.877937	0.903232	0.90592	0.888582	0.748037	0.765281	0.694357	0.707486	0.752832	0.76141	0.734196	0.748168
Diplotene rep1 (PB)	PRJB00004_P8.CEL																							1	0.952817	0.870233	0.892079	0.914403	0.913674	0.911058	0.930317	0.935764	0.924765	0.769401	0.786518	0.732852	0.7459	0.780833	0.787353	0.765456	0.778174
Diplotene rep2 (PB)	PRJB00006_P10.CEL																								1	0.873868	0.887502	0.915311	0.913541	0.946123	0.884692	0.944786	0.952826	0.7784	0.780548	0.73119	0.745953	0.757703	0.763886	0.748737	0.760932
Pachytene spermatocytes rep1 (JL)	GSM95948.CEL																									1	0.987657	0.884586	0.891926	0.846437	0.787357	0.826217	0.833532	0.841952	0.813505	0.679095	0.69219	0.700807	0.712013	0.681537	0.700666
Pachytene spermatocytes rep2 (JL)	GSM95949.CEL																										1	0.908287	0.914813	0.856393	0.810876	0.848716	0.857537	0.848398	0.832797	0.70609	0.719853	0.733167	0.744235	0.711432	0.731122
spermatocyte rep1 (MP)	MSC1_MOE430_2_philippe_demougin_011204.CEL																											1	0.997499	0.898748	0.863899	0.901737	0.915615	0.819245	0.831021	0.839707	0.853495	0.868999	0.877377	0.855277	0.870264
spermatocyte rep2 (MP)	MSC2_MOE430_2_philippe_demougin_011204.CEL																												1	0.898278	0.861871	0.899514	0.91363	0.824207	0.835883	0.83869	0.852537	0.867436	0.876169	0.852989	0.867848
Round Spermatids rep1 (PB)	P9.CEL																													1	0.923139	0.972041	0.972337	0.847585	0.849147	0.813184	0.825463	0.806334	0.810497	0.801173	0.813048
Round Spermatids rep2 (PB)	PRJB00004_P9.CEL																														1	0.959005	0.93929	0.835202	0.860045	0.843111	0.851641	0.853839	0.855602	0.843235	0.85171
Round Spermatids rep3 (PB)	PRJB00005_P9.CEL																															1	0.982228	0.839838	0.855575	0.830955	0.842944	0.831585	0.835149	0.82368	0.834025
Round Spermatids rep4 (PB)	PRJB00006_P12.CEL																																1	0.852415	0.866724	0.846025	0.85924	0.837349	0.840579	0.829473	0.84048
Round spermatids rep1 (JL)	GSM95950.CEL																																	1	0.979903	0.868496	0.87399	0.820022	0.826452	0.803821	0.820186
Round spermatids rep2 (JL)	GSM95951.CEL																																		1	0.905353	0.909602	0.868582	0.873237	0.850189	0.864116
spermatid rep1 (MP)	MST1_MOE430_2_philippe_demougin_011204.CEL																																			1	0.998055	0.969061	0.967551	0.966873	0.970213
spermatid rep2 (MP)	MST2_MOE430_2_philippe_demougin_011204.CEL																																				1	0.967799	0.967152	0.964485	0.969095
seminiferous tubule rep1 (MP)	MTU1_MOE430_2_philippe_demougin_011204.CEL																																					1	0.997578	0.992979	0.995902
seminiferous tubule rep2 (MP)	MTU2_MOE430_2_philippe_demougin_011204.CEL																																						1	0.989348	0.993978
total testis rep1 (MP)	MTT1_MOE430_2_philippe_demougin_011204.CEL																																							1	0.99577
total testis rep2 (MP)	MTT2_MOE430_2_philippe_demougin_011204.CEL																																								1
